# Supplementary material for: A cryptic K48 ubiquitin chain binding site on UCH37 is required for its role in proteasomal degradation
Source: eLife. 2022 Apr 22;11:e76100. doi: 10.7554/eLife.76100 (PMC9033301; doi:10.7554/eLife.76100)
Supplement: Figure 1—source data 1. [file elife-76100-fig1-data1.xlsx]

## Sheet:  ITC
		Bio Reps
Protein	Ligand	#1		#2		Average (µM)
		Kd (µM)	Error of fitting (µM)	Kd (µM)	Error of fitting (µM)
UCH37 C88A 1-226	K48 tri-Ub	0.11	0.01	0.15	0.03	0.13
	K48 tetra-Ub	0.032	0.008	0.024	0.005	0.028
	K6 tri-Ub	NB	NB	NB	NB	NB
	K6 tetra-Ub	NB	NB	NB	NB	NB
	K63 tri-Ub	NB	NB	NB	NB	NB
	K63 tetra-Ub	NB	NB	NB	NB	NB
		Bio Reps
Protein	Ligand	#1		#2		Average (µM)
		Kd (µM)	Error of fitting (µM)	Kd (µM)	Error of fitting (µM)
Ub~UCH37•RPN13DEUBAD	Ub	7.2	1	4.9	0.8	6.05
	K48 di-Ub	0.31	0.1	0.54	0.1	0.425
	K6/K48 tri-Ub	0.44	0.2	0.39	0.1	0.415
		Bio Reps
Protein	Ligand	#1		#2		Average (µM)
		Kd (µM)	Error of fitting (µM)	Kd (µM)	Error of fitting (µM)
UCH37 C88A/F117A•RPN13	Ub	6.8	1.2	4.9	0.8	5.85
	K48 di-Ub	2.5	0.4	1.7	0.2	2.1
UCH37 C88A/F121A•RPN13	Ub	9.1	1	8.5	1	8.8
	K48 di-Ub	3.1	0.5	4.5	0.7	3.8
UCH37 C88A/I216E•RPN13	Ub	11	2	8	2	9.5
	K48 di-Ub	0.38	0.02	0.17	0.005	0.275
UCH37 C88A/L181A•RPN13	Ub	8.7	1	6.9	1	7.8
	K48 di-Ub	4.9	1	6.8	0.5	5.85
		Bio Reps
Protein	Ligand	#1		#2		Average (µM)
		Kd (µM)	Error of fitting (µM)	Kd (µM)	Error of fitting (µM)
UCH37 C88A/E113A•RPN13	Ub	5.4	1.2	3.8	0.8	4.6
	K48 di-Ub	0.41	0.3	0.62	0.4	0.515
UCH37 C88A/K115A•RPN13	Ub	9.9	1.8	7.4	1.6	8.65
	K48 di-Ub	0.56	0.4	0.34	0.2	0.45
UCH37 C88A/F117A•RPN13	Ub	6.8	1.2	4.9	0.8	5.85
	K48 di-Ub	2.5	0.4	1.7	0.2	2.1
UCH37 C88A/Q119A•RPN13	Ub	7.2	1.1	6.1	0.7	6.65
	K48 di-Ub	0.46	0.2	0.61	0.4	0.535
UCH37 C88A/S120A•RPN13	Ub	8.8	1.6	5.4	1.1	7.1
	K48 di-Ub	0.64	0.2	0.42	0.1	0.53
UCH37 C88A/F121A•RPN13	Ub	9.1	1	8.5	1	8.8
	K48 di-Ub	3.1	0.5	4.5	0.7	3.8
UCH37 C88A/M125A•RPN13	Ub	11.9	2.1	8.2	1.5	10.05
	K48 di-Ub	0.85	0.2	0.67	0.2	0.76
UCH37 C88A/K126A•RPN13	Ub	12.5	2.1	11.5	1.8	12
	K48 di-Ub	0.92	0.4	0.78	0.2	0.85
UCH37 C88A/G127A•RPN13	Ub	8.5	1	7.1	0.8	7.8
	K48 di-Ub	0.82	0.2	0.76	0.2	0.79
UCH37 C88A/L128A•RPN13	Ub	9.4	1.2	7	1.4	8.2
	K48 di-Ub	0.58	0.2	0.76	0.3	0.67
UCH37 C88A/L130A•RPN13	Ub	8.8	1.3	4.8	1	6.8
	K48 di-Ub	0.33	0.1	0.77	0.3	0.55
UCH37 C88A/S131A•RPN13	Ub	6.8	1.4	4.9	1.1	5.85
	K48 di-Ub	0.38	0.1	0.58	0.1	0.48
UCH37 C88A/N132A•RPN13	Ub	7.6	1.2	5.4	1.1	6.5
	K48 di-Ub	0.46	0.1	0.69	0.2	0.575
UCH37 C88A/S133A•RPN13	Ub	9.2	2	7.4	1.7	8.3
	K48 di-Ub	0.7	0.3	0.54	0.2	0.62
UCH37 C88A/D134A•RPN13	Ub	10	1.8	7.6	1.3	8.8
	K48 di-Ub	0.57	0.2	0.39	0.1	0.48

## Sheet:  SEC-MALs
	raw UV absorbance data: detector voltage (V)										Molar Mass (g/mol)
time (min)	K48 Ub3	K6/48 Ub3	UCH37 C88A 1-226	UCH37 C88A-DEUBAD	UCH37 C88A 1-226:K48 Ub3	UCH37 C88A-DEUBAD:K48 Ub3 complex	UCH37 C88A-DEUBAD:K6/48 Ub3 complex			time (min)	K48 Ub3	K6/48 Ub3	UCH37 C88A 1-226	UCH37 C88A-DEUBAD	UCH37 C88A 1-226:K48 Ub3	UCH37 C88A-DEUBAD:K48 Ub3 complex	UCH37 C88A-DEUBAD:K6/48 Ub3 complex
0.000927	0.053054	0.052438	0.052851	0.053009	0.052854	0.053076	0.0530647			0.000927
0.009117	0.053048	0.052435	0.052851	0.053006	0.052852	0.053078	0.0530649			0.009117
0.017307	0.053044	0.052435	0.052846	0.053004	0.052851	0.053077	0.0530629			0.017307
0.025497	0.053044	0.05243	0.052839	0.053002	0.052855	0.053076	0.0530617			0.025497
0.033686	0.053038	0.052428	0.052831	0.052992	0.052855	0.053076	0.0530565			0.033686
0.041876	0.053035	0.052424	0.052826	0.052986	0.052849	0.053079	0.0530519			0.041876
0.050066	0.05303	0.05242	0.052821	0.052985	0.052847	0.053082	0.053058			0.050066
0.058256	0.053025	0.052419	0.052819	0.052983	0.052848	0.053082	0.053074			0.058256
0.066445	0.053024	0.052422	0.052822	0.052986	0.052848	0.053082	0.0530918			0.066445
0.074635	0.053027	0.052426	0.052829	0.052984	0.052846	0.053081	0.0531067			0.074635
0.082825	0.053032	0.052426	0.052842	0.052985	0.052846	0.053077	0.053114			0.082825
0.091015	0.053033	0.052431	0.052869	0.052989	0.05285	0.053079	0.0531072			0.091015
0.099205	0.053039	0.052435	0.052916	0.052992	0.052851	0.053079	0.0530888			0.099205
0.107394	0.053044	0.052437	0.05298	0.052992	0.052848	0.053078	0.0530715			0.107394
0.115584	0.053046	0.052436	0.053055	0.052995	0.052846	0.053076	0.0530621			0.115584
0.123774	0.053045	0.052435	0.053129	0.053001	0.052841	0.053076	0.0530605			0.123774
0.131964	0.053044	0.052437	0.053187	0.053	0.052838	0.05308	0.0530721			0.131964
0.140154	0.053046	0.052437	0.05321	0.053	0.052836	0.053082	0.0531049			0.140154
0.148343	0.053046	0.052438	0.053197	0.053003	0.052832	0.053078	0.0531726			0.148343
0.156533	0.053047	0.052437	0.053167	0.053003	0.052835	0.053077	0.0533207			0.156533
0.164723	0.053046	0.052437	0.053132	0.053001	0.052841	0.053078	0.0536242			0.164723
0.172913	0.053046	0.052434	0.053101	0.053002	0.052845	0.053081	0.0541545			0.172913
0.181102	0.053043	0.05243	0.053088	0.053003	0.052847	0.053079	0.054949			0.181102
0.189292	0.053038	0.05243	0.053095	0.053004	0.05285	0.053073	0.0559986			0.189292
0.197482	0.053038	0.052432	0.05311	0.053007	0.052853	0.053072	0.0572358			0.197482
0.205672	0.05304	0.052434	0.053125	0.053009	0.05285	0.053072	0.0585456			0.205672
0.213862	0.053042	0.052434	0.053137	0.05301	0.052845	0.053072	0.0598118			0.213862
0.222051	0.053043	0.052436	0.053144	0.05301	0.052843	0.053072	0.0609575			0.222051
0.230241	0.053045	0.052438	0.053147	0.053008	0.052844	0.053074	0.0619539			0.230241
0.238431	0.053048	0.05244	0.053146	0.053005	0.052845	0.053074	0.0628089			0.238431
0.246621	0.05305	0.052441	0.053143	0.053005	0.052843	0.053072	0.0635638			0.246621
0.254811	0.053051	0.052442	0.053141	0.053008	0.052846	0.053073	0.0642608			0.254811
0.263	0.053053	0.052444	0.053138	0.053009	0.052853	0.053073	0.0649147			0.263
0.27119	0.053055	0.052446	0.053134	0.053007	0.052851	0.053073	0.0654985			0.27119
0.27938	0.053057	0.052447	0.053132	0.053007	0.052848	0.053076	0.0659611			0.27938
0.28757	0.053059	0.052446	0.053129	0.053006	0.052848	0.05308	0.0662591			0.28757
0.295759	0.053058	0.05245	0.053126	0.053008	0.052846	0.053086	0.0663734			0.295759
0.303949	0.053062	0.05245	0.053126	0.053011	0.052845	0.053087	0.0663132			0.303949
0.312139	0.053062	0.052446	0.053128	0.053012	0.052844	0.053081	0.0661161			0.312139
0.320329	0.053058	0.052445	0.053131	0.053014	0.052842	0.05308	0.0658372			0.320329
0.328519	0.053056	0.052444	0.053133	0.053012	0.052841	0.053082	0.0655212			0.328519
0.336708	0.053055	0.052449	0.053137	0.053011	0.052843	0.05308	0.0651942			0.336708
0.344898	0.053061	0.052451	0.053139	0.053009	0.052845	0.053079	0.0648816			0.344898
0.353088	0.053064	0.05245	0.053142	0.053007	0.052848	0.053076	0.0646018			0.353088
0.361278	0.053063	0.052449	0.053148	0.05301	0.05285	0.053074	0.0643606			0.361278
0.369468	0.053061	0.052447	0.05315	0.053011	0.052854	0.053076	0.0641586			0.369468
0.377657	0.053059	0.052446	0.053148	0.053009	0.052856	0.053074	0.0639812			0.377657
0.385847	0.053058	0.052443	0.053149	0.053006	0.052859	0.053075	0.0638207			0.385847
0.394037	0.053054	0.052445	0.053154	0.053004	0.052862	0.053077	0.0636755			0.394037
0.402227	0.053056	0.05245	0.053159	0.053005	0.05286	0.053074	0.0635514			0.402227
0.410416	0.053062	0.05245	0.053163	0.053005	0.052858	0.053073	0.0634627			0.410416
0.418606	0.053063	0.05245	0.053167	0.053006	0.052859	0.053076	0.063402			0.418606
0.426796	0.053063	0.052451	0.053176	0.053011	0.05286	0.053074	0.0633495			0.426796
0.434986	0.053064	0.052453	0.053179	0.053015	0.052858	0.053071	0.0632929			0.434986
0.443176	0.053066	0.052451	0.053179	0.053014	0.052855	0.053072	0.0632154			0.443176
0.451365	0.053064	0.05245	0.05318	0.053012	0.052854	0.053074	0.0631032			0.451365
0.459555	0.053062	0.052446	0.053174	0.053011	0.052853	0.053076	0.0629549			0.459555
0.467745	0.053057	0.052446	0.053165	0.053013	0.052854	0.053083	0.0627656			0.467745
0.475935	0.053057	0.052448	0.053152	0.053012	0.052858	0.053083	0.0625344			0.475935
0.484125	0.05306	0.052448	0.053133	0.053011	0.052862	0.053083	0.0622759			0.484125
0.492314	0.05306	0.052449	0.053116	0.053013	0.052861	0.053084	0.0619994			0.492314
0.500504	0.053061	0.052448	0.053103	0.053012	0.052861	0.05308	0.0617063			0.500504
0.508694	0.05306	0.052447	0.053093	0.053013	0.052859	0.053078	0.0614078			0.508694
0.516884	0.053059	0.05245	0.053089	0.053015	0.052857	0.05308	0.0611122			0.516884
0.525073	0.053063	0.052451	0.053089	0.053012	0.052858	0.053078	0.0608201			0.525073
0.533263	0.053064	0.052454	0.053088	0.053015	0.052858	0.053076	0.0605341			0.533263
0.541453	0.053068	0.052454	0.053082	0.053017	0.052856	0.053078	0.0602624			0.541453
0.549643	0.053067	0.052454	0.053075	0.053014	0.052856	0.053078	0.06001			0.549643
0.557833	0.053067	0.052455	0.053065	0.053008	0.052859	0.053075	0.0597702			0.557833
0.566022	0.053069	0.052454	0.053057	0.053005	0.052859	0.053072	0.0595497			0.566022
0.574212	0.053067	0.052452	0.053051	0.05301	0.052856	0.053072	0.0593458			0.574212
0.582402	0.053065	0.05245	0.053048	0.053013	0.052852	0.053074	0.0591462			0.582402
0.590592	0.053062	0.052452	0.053053	0.053014	0.052851	0.053076	0.0589495			0.590592
0.598781	0.053065	0.052454	0.053055	0.053014	0.052857	0.053079	0.0587541			0.598781
0.606971	0.053068	0.052452	0.053052	0.053011	0.052859	0.053079	0.0585662			0.606971
0.615161	0.053065	0.052452	0.053048	0.053009	0.052858	0.053077	0.0583944			0.615161
0.623351	0.053065	0.052452	0.053044	0.053011	0.052857	0.053079	0.058234			0.623351
0.631541	0.053065	0.05245	0.053037	0.053013	0.052856	0.053082	0.0580755			0.631541
0.63973	0.053063	0.052447	0.053029	0.053014	0.052857	0.053081	0.0579185			0.63973
0.64792	0.053059	0.052449	0.053027	0.053015	0.052856	0.053082	0.0577656			0.64792
0.65611	0.053061	0.052452	0.053028	0.053015	0.052852	0.053082	0.0576147			0.65611
0.6643	0.053065	0.052452	0.053027	0.053017	0.052846	0.05308	0.0574663			0.6643
0.67249	0.053065	0.052453	0.053026	0.053017	0.052844	0.053078	0.0573308			0.67249
0.680679	0.053066	0.052456	0.053023	0.053014	0.052843	0.053078	0.0572071			0.680679
0.688869	0.05307	0.052454	0.05302	0.053016	0.052841	0.053079	0.0570883			0.688869
0.697059	0.053068	0.052451	0.053017	0.053016	0.052841	0.053076	0.0569705			0.697059
0.705249	0.053064	0.052454	0.053016	0.053012	0.052845	0.053074	0.0568564			0.705249
0.713438	0.053068	0.052456	0.053016	0.053013	0.052848	0.053073	0.0567456			0.713438
0.721628	0.05307	0.052454	0.053017	0.053012	0.052848	0.053073	0.0566362			0.721628
0.729818	0.053068	0.052455	0.053018	0.053011	0.052847	0.053076	0.0565352			0.729818
0.738008	0.053069	0.052455	0.05302	0.053013	0.052845	0.053079	0.0564424			0.738008
0.746198	0.053069	0.052454	0.053021	0.053018	0.052845	0.053078	0.0563589			0.746198
0.754387	0.053067	0.052454	0.053019	0.053021	0.052844	0.053076	0.0562892			0.754387
0.762577	0.053068	0.052455	0.053016	0.053021	0.052846	0.053074	0.0562178			0.762577
0.770767	0.053069	0.052451	0.053014	0.05302	0.05285	0.053074	0.056139			0.770767
0.778957	0.053064	0.05245	0.053012	0.05302	0.052854	0.053076	0.0560565			0.778957
0.787147	0.053063	0.05245	0.053013	0.053021	0.052856	0.053076	0.055972			0.787147
0.795336	0.053063	0.05245	0.053013	0.053018	0.052855	0.053074	0.0558915			0.795336
0.803526	0.053062	0.052453	0.05301	0.053016	0.052852	0.053074	0.0558155			0.803526
0.811716	0.053066	0.052454	0.053006	0.053013	0.052852	0.053076	0.0557456			0.811716
0.819906	0.053068	0.052454	0.053002	0.053011	0.052853	0.053077	0.0556808			0.819906
0.828095	0.053068	0.052458	0.053001	0.053008	0.052855	0.053077	0.0556224			0.828095
0.836285	0.053073	0.052462	0.053	0.053006	0.052858	0.053075	0.0555655			0.836285
0.844475	0.053078	0.052461	0.052996	0.053012	0.052861	0.053072	0.05551			0.844475
0.852665	0.053076	0.052458	0.052994	0.053017	0.052862	0.053068	0.0554601			0.852665
0.860855	0.053072	0.052455	0.052996	0.053011	0.052861	0.05307	0.0554133			0.860855
0.869044	0.053069	0.052455	0.052997	0.053006	0.052859	0.053074	0.0553702			0.869044
0.877234	0.053069	0.052456	0.052996	0.053011	0.052856	0.053075	0.0553245			0.877234
0.885424	0.05307	0.052454	0.052996	0.053015	0.052855	0.053074	0.0552818			0.885424
0.893614	0.053068	0.052456	0.052995	0.053014	0.052858	0.053071	0.0552425			0.893614
0.901804	0.05307	0.052456	0.052993	0.053012	0.052858	0.053067	0.0552026			0.901804
0.909993	0.05307	0.052458	0.052994	0.053011	0.052856	0.05307	0.0551643			0.909993
0.918183	0.053072	0.05246	0.052993	0.053006	0.052859	0.053077	0.0551252			0.918183
0.926373	0.053075	0.052458	0.05299	0.053003	0.052862	0.053077	0.0550915			0.926373
0.934563	0.053072	0.05246	0.052989	0.053005	0.052861	0.053077	0.0550617			0.934563
0.942752	0.053075	0.052461	0.052988	0.053007	0.052859	0.053077	0.0550304			0.942752
0.950942	0.053076	0.052458	0.052987	0.053007	0.052855	0.053071	0.054999			0.950942
0.959132	0.053073	0.052458	0.052985	0.053005	0.052848	0.053074	0.0549657			0.959132
0.967322	0.053073	0.052458	0.052984	0.053005	0.052846	0.053076	0.0549354			0.967322
0.975512	0.053073	0.052461	0.052986	0.053008	0.05285	0.053073	0.0549086			0.975512
0.983701	0.053076	0.052461	0.05299	0.05301	0.052848	0.053071	0.0548738			0.983701
0.991891	0.053076	0.052462	0.052991	0.053012	0.052846	0.053068	0.0548385			0.991891
1.00008	0.053077	0.05246	0.05299	0.053014	0.05285	0.053068	0.0548083			1.00008
1.00827	0.053075	0.052457	0.052989	0.05301	0.052852	0.053073	0.0547836			1.00827
1.01646	0.053071	0.052457	0.052987	0.053003	0.052854	0.053075	0.0547615			1.01646
1.02465	0.053071	0.052455	0.052983	0.053001	0.052854	0.053074	0.0547404			1.02465
1.03284	0.053069	0.052453	0.052979	0.053002	0.05285	0.053072	0.0547181			1.03284
1.04103	0.053066	0.052454	0.052975	0.053006	0.052851	0.053073	0.0546956			1.04103
1.04922	0.053068	0.052459	0.052975	0.053012	0.052853	0.053081	0.0546741			1.04922
1.05741	0.053074	0.052459	0.052979	0.053016	0.05285	0.053083	0.0546444			1.05741
1.0656	0.053074	0.05246	0.052979	0.053019	0.052848	0.053084	0.0546148			1.0656
1.07379	0.053075	0.052461	0.052977	0.053018	0.052848	0.053085	0.0545959			1.07379
1.08198	0.053076	0.05246	0.052977	0.053017	0.052845	0.053086	0.054582			1.08198
1.09017	0.053075	0.052462	0.052976	0.053018	0.052845	0.053086	0.0545648			1.09017
1.09836	0.053077	0.052462	0.052976	0.053013	0.052845	0.053083	0.0545485			1.09836
1.10655	0.053077	0.052462	0.052977	0.053011	0.052846	0.05308	0.0545364			1.10655
1.11474	0.053078	0.052464	0.052976	0.053015	0.052847	0.053074	0.0545253			1.11474
1.12293	0.05308	0.052462	0.05297	0.053016	0.052845	0.05307	0.0545084			1.12293
1.13112	0.053078	0.05246	0.052967	0.053017	0.052842	0.053072	0.0544873			1.13112
1.13931	0.053075	0.052459	0.05297	0.053016	0.05284	0.053072	0.0544693			1.13931
1.1475	0.053074	0.052462	0.052973	0.053015	0.052838	0.053075	0.0544542			1.1475
1.15569	0.053077	0.052462	0.052971	0.053015	0.052838	0.05308	0.0544385			1.15569
1.16388	0.053078	0.052462	0.052962	0.053014	0.052842	0.053077	0.054418			1.16388
1.17207	0.053077	0.052463	0.052955	0.05301	0.052846	0.053074	0.0543983			1.17207
1.18026	0.053079	0.052463	0.052958	0.053011	0.052847	0.053076	0.0543868			1.18026
1.18845	0.053079	0.052461	0.052962	0.053014	0.052847	0.05308	0.0543777			1.18845
1.19664	0.053076	0.052461	0.052961	0.053017	0.052849	0.053077	0.0543684			1.19664
1.20483	0.053076	0.052462	0.052962	0.053021	0.052849	0.053073	0.0543592			1.20483
1.21301	0.053077	0.052463	0.052966	0.053022	0.052849	0.053077	0.0543498			1.21301
1.22121	0.053079	0.052464	0.052967	0.05302	0.052847	0.053076	0.0543362			1.22121
1.2294	0.05308	0.052462	0.052966	0.05302	0.052842	0.053076	0.0543193			1.2294
1.23758	0.053078	0.052462	0.052963	0.053019	0.05284	0.053076	0.0543017			1.23758
1.24577	0.053078	0.052462	0.052961	0.053019	0.052839	0.053073	0.0542858			1.24577
1.25396	0.053078	0.052461	0.052962	0.05302	0.052847	0.053074	0.0542725			1.25396
1.26215	0.053076	0.052462	0.052966	0.053016	0.052851	0.053075	0.0542587			1.26215
1.27034	0.053077	0.052463	0.052969	0.053014	0.052849	0.053078	0.0542433			1.27034
1.27853	0.053079	0.052465	0.052967	0.053018	0.052847	0.05308	0.0542272			1.27853
1.28672	0.053081	0.052466	0.052964	0.053019	0.052843	0.053079	0.0542142			1.28672
1.29491	0.053083	0.052466	0.052959	0.053015	0.052839	0.053081	0.0542051			1.29491
1.3031	0.053083	0.052466	0.052957	0.053018	0.052834	0.05308	0.0541976			1.3031
1.31129	0.053083	0.052468	0.052953	0.053018	0.052834	0.053078	0.0541907			1.31129
1.31948	0.053085	0.052468	0.052951	0.053016	0.052841	0.053075	0.0541831			1.31948
1.32767	0.053085	0.052469	0.052955	0.053016	0.052844	0.053069	0.0541734			1.32767
1.33586	0.053086	0.052469	0.052959	0.053017	0.052842	0.05307	0.0541698			1.33586
1.34405	0.053086	0.052467	0.052962	0.053021	0.052841	0.053075	0.0541664			1.34405
1.35224	0.053084	0.052464	0.052961	0.053023	0.052845	0.053076	0.0541553			1.35224
1.36043	0.05308	0.052462	0.05296	0.053023	0.052848	0.053074	0.0541418			1.36043
1.36862	0.053077	0.052462	0.052961	0.053022	0.052847	0.053074	0.0541284			1.36862
1.37681	0.053078	0.052463	0.052958	0.053022	0.052846	0.053074	0.0541175			1.37681
1.385	0.053079	0.052462	0.052958	0.053016	0.052848	0.053076	0.0541067			1.385
1.39319	0.053078	0.052462	0.052964	0.053016	0.052851	0.053073	0.0540962			1.39319
1.40138	0.053077	0.052462	0.052969	0.053019	0.052852	0.053074	0.0540871			1.40138
1.40957	0.053078	0.052462	0.052969	0.053018	0.052854	0.053078	0.0540766			1.40957
1.41776	0.053078	0.052459	0.052967	0.05302	0.052859	0.053079	0.0540626			1.41776
1.42595	0.053074	0.052458	0.052966	0.053021	0.052862	0.05308	0.0540503			1.42595
1.43414	0.053072	0.052461	0.052963	0.05302	0.052861	0.053078	0.054043			1.43414
1.44233	0.053076	0.052463	0.052959	0.053018	0.05286	0.053077	0.0540366			1.44233
1.45052	0.053079	0.052462	0.052957	0.053018	0.052857	0.053074	0.0540313			1.45052
1.45871	0.053078	0.05246	0.052957	0.053019	0.052851	0.053073	0.0540247			1.45871
1.4669	0.053075	0.05246	0.052957	0.053016	0.052848	0.053074	0.0540165			1.4669
1.47509	0.053075	0.052462	0.052957	0.053012	0.052848	0.053073	0.0540118			1.47509
1.48328	0.053077	0.052461	0.052957	0.053009	0.052846	0.053074	0.0540085			1.48328
1.49147	0.053076	0.052463	0.052957	0.053006	0.052846	0.053076	0.054001			1.49147
1.49966	0.053079	0.052463	0.052956	0.053006	0.052848	0.053076	0.0539914			1.49966
1.50785	0.053079	0.052462	0.052956	0.053008	0.05285	0.053076	0.0539832			1.50785
1.51604	0.053077	0.052464	0.052956	0.053013	0.052848	0.053072	0.0539762			1.51604
1.52423	0.05308	0.052466	0.052953	0.053015	0.052847	0.05307	0.0539691			1.52423
1.53242	0.053082	0.052463	0.05295	0.053016	0.052848	0.05307	0.0539609			1.53242
1.54061	0.053079	0.052463	0.052952	0.053018	0.052846	0.05307	0.0539545			1.54061
1.5488	0.053079	0.052462	0.052956	0.053018	0.052849	0.053067	0.0539495			1.5488
1.55699	0.053077	0.052463	0.052961	0.053016	0.052851	0.053067	0.0539426			1.55699
1.56518	0.053079	0.052465	0.052964	0.053016	0.052849	0.053071	0.0539391			1.56518
1.57337	0.053081	0.052462	0.052965	0.053017	0.052846	0.05307	0.0539383			1.57337
1.58156	0.053078	0.052463	0.052964	0.05302	0.052844	0.053067	0.05393			1.58156
1.58974	0.053079	0.052465	0.052962	0.053025	0.052843	0.053068	0.0539211			1.58974
1.59794	0.053081	0.052466	0.052959	0.053022	0.052844	0.053069	0.0539112			1.59794
1.60613	0.053082	0.052466	0.052956	0.053019	0.052842	0.053069	0.0538939			1.60613
1.61431	0.053082	0.052467	0.052954	0.053016	0.052841	0.053069	0.053879			1.61431
1.62251	0.053084	0.05247	0.052954	0.053012	0.052844	0.053067	0.0538732			1.62251
1.63069	0.053087	0.052471	0.052955	0.053014	0.052847	0.053071	0.0538714			1.63069
1.63888	0.053089	0.05247	0.052955	0.053015	0.052845	0.053074	0.0538697			1.63888
1.64707	0.053088	0.05247	0.052955	0.053016	0.052841	0.053072	0.0538727			1.64707
1.65526	0.053088	0.052468	0.052957	0.053015	0.052837	0.053073	0.0538788			1.65526
1.66345	0.053085	0.052468	0.05296	0.053018	0.052836	0.053072	0.0538796			1.66345
1.67164	0.053085	0.052468	0.052963	0.053018	0.05284	0.053071	0.0538752			1.67164
1.67983	0.053085	0.052468	0.052969	0.053012	0.052844	0.053074	0.0538677			1.67983
1.68802	0.053085	0.052466	0.05297	0.053009	0.05285	0.053077	0.053862			1.68802
1.69621	0.053083	0.052464	0.052969	0.053014	0.052854	0.053077	0.0538605			1.69621
1.7044	0.05308	0.052463	0.05297	0.053019	0.052852	0.053075	0.0538577			1.7044
1.71259	0.053079	0.052466	0.052968	0.05302	0.05285	0.053072	0.053852			1.71259
1.72078	0.053083	0.052469	0.052965	0.053013	0.05285	0.053071	0.0538464			1.72078
1.72897	0.053086	0.052468	0.052964	0.053009	0.052851	0.053067	0.0538432			1.72897
1.73716	0.053085	0.05247	0.052962	0.053006	0.052852	0.053068	0.0538372			1.73716
1.74535	0.053087	0.052474	0.052958	0.053007	0.05285	0.053074	0.053828			1.74535
1.75354	0.053093	0.052477	0.052957	0.053012	0.05285	0.053073	0.0538222			1.75354
1.76173	0.053096	0.052478	0.052963	0.053013	0.052852	0.053071	0.0538181			1.76173
1.76992	0.053097	0.052475	0.052967	0.053014	0.052851	0.053075	0.0538129			1.76992
1.77811	0.053094	0.05247	0.052967	0.053014	0.052851	0.053075	0.0538078			1.77811
1.7863	0.053088	0.05247	0.052969	0.053015	0.05285	0.053074	0.0538064			1.7863
1.79449	0.053088	0.05247	0.052967	0.053019	0.052847	0.053074	0.0538047			1.79449
1.80268	0.053088	0.05247	0.052967	0.053019	0.052844	0.053075	0.0537965			1.80268
1.81087	0.053088	0.052466	0.052967	0.053019	0.052841	0.053079	0.0537879			1.81087
1.81906	0.053082	0.052466	0.052963	0.053018	0.052842	0.053079	0.0537799			1.81906
1.82725	0.053082	0.05247	0.052958	0.053019	0.052846	0.053079	0.0537741			1.82725
1.83544	0.053087	0.05247	0.052955	0.053017	0.052849	0.053078	0.0537702			1.83544
1.84363	0.053088	0.052472	0.052954	0.053014	0.052849	0.053077	0.053762			1.84363
1.85182	0.05309	0.05247	0.052953	0.05301	0.052847	0.053072	0.0537567			1.85182
1.86001	0.053088	0.052467	0.052951	0.053006	0.052847	0.053068	0.0537569			1.86001
1.8682	0.053084	0.052467	0.052949	0.053008	0.052848	0.053067	0.0537573			1.8682
1.87639	0.053084	0.052466	0.052944	0.05301	0.052849	0.053067	0.0537565			1.87639
1.88458	0.053082	0.052467	0.052938	0.053012	0.052852	0.053071	0.0537522			1.88458
1.89277	0.053084	0.052471	0.052937	0.053015	0.052852	0.053068	0.0537481			1.89277
1.90096	0.053089	0.052471	0.052936	0.053016	0.05285	0.05307	0.0537468			1.90096
1.90915	0.053089	0.052471	0.052938	0.053015	0.05285	0.053075	0.0537443			1.90915
1.91734	0.053089	0.052472	0.052945	0.053013	0.052848	0.053072	0.0537401			1.91734
1.92553	0.05309	0.052474	0.05295	0.053009	0.052846	0.053073	0.0537353			1.92553
1.93372	0.053093	0.052478	0.052954	0.05301	0.052848	0.053077	0.0537324			1.93372
1.94191	0.053098	0.052477	0.05296	0.05301	0.052847	0.05308	0.0537323			1.94191
1.9501	0.053096	0.052473	0.05296	0.053011	0.052843	0.053083	0.0537343			1.9501
1.95829	0.053091	0.052474	0.05296	0.053014	0.052844	0.053085	0.0537329			1.95829
1.96648	0.053093	0.052475	0.052962	0.053016	0.052843	0.053082	0.0537254			1.96648
1.97466	0.053094	0.052474	0.052958	0.053016	0.052837	0.053079	0.0537167			1.97466
1.98286	0.053093	0.052473	0.05295	0.053015	0.052837	0.053082	0.0537083			1.98286
1.99104	0.053091	0.052471	0.052942	0.053014	0.05284	0.05308	0.0537055			1.99104
1.99924	0.053089	0.052471	0.052936	0.053014	0.052839	0.053077	0.0537038			1.99924
2.00742	0.053089	0.052473	0.052935	0.053012	0.05284	0.053075	0.0536985			2.00742
2.01561	0.053091	0.052472	0.052941	0.053011	0.052846	0.053076	0.053694			2.01561
2.0238	0.05309	0.052473	0.05295	0.053011	0.05285	0.053077	0.0536894			2.0238
2.03199	0.053091	0.052478	0.052952	0.05301	0.052851	0.053079	0.0536831			2.03199
2.04018	0.053097	0.052481	0.052954	0.053011	0.052851	0.053079	0.0536795			2.04018
2.04837	0.053101	0.052479	0.052953	0.053014	0.05285	0.05308	0.0536769			2.04837
2.05656	0.053099	0.052478	0.052953	0.053018	0.052848	0.053082	0.0536727			2.05656
2.06475	0.053098	0.05248	0.05295	0.05302	0.052846	0.053083	0.0536718			2.06475
2.07294	0.0531	0.052481	0.052944	0.053021	0.052845	0.053078	0.0536736			2.07294
2.08113	0.053101	0.052479	0.05294	0.053019	0.052847	0.053075	0.053674			2.08113
2.08932	0.053099	0.052476	0.052937	0.053017	0.052847	0.053073	0.0536697			2.08932
2.09751	0.053095	0.052472	0.052936	0.053015	0.052847	0.05307	0.0536677			2.09751
2.1057	0.05309	0.05247	0.052936	0.053014	0.052846	0.053072	0.0536676			2.1057
2.11389	0.053088	0.052471	0.052933	0.053017	0.052845	0.053078	0.0536642			2.11389
2.12208	0.053089	0.052468	0.052933	0.053016	0.052847	0.053083	0.0536653			2.12208
2.13027	0.053085	0.052466	0.052934	0.053015	0.05285	0.053083	0.0536658			2.13027
2.13846	0.053082	0.052468	0.052928	0.053015	0.052849	0.053081	0.0536615			2.13846
2.14665	0.053085	0.052467	0.052925	0.053016	0.052848	0.053077	0.0536586			2.14665
2.15484	0.053084	0.052468	0.052925	0.05302	0.052847	0.053074	0.0536572			2.15484
2.16303	0.053085	0.052471	0.052926	0.053021	0.052844	0.053075	0.0536563			2.16303
2.17122	0.053089	0.052474	0.05293	0.053018	0.052844	0.05308	0.0536559			2.17122
2.17941	0.053092	0.052475	0.052933	0.053018	0.052846	0.053083	0.0536563			2.17941
2.1876	0.053094	0.052475	0.052937	0.053018	0.052849	0.053083	0.0536526			2.1876
2.19579	0.053094	0.052477	0.052943	0.053014	0.052854	0.053078	0.0536436			2.19579
2.20398	0.053096	0.052477	0.052948	0.053015	0.052856	0.053074	0.0536387			2.20398
2.21217	0.053096	0.052474	0.052946	0.053013	0.052856	0.053074	0.0536361			2.21217
2.22036	0.053093	0.052476	0.052941	0.053014	0.052856	0.053075	0.0536305			2.22036
2.22855	0.053095	0.052477	0.052938	0.053017	0.052854	0.053076	0.0536257			2.22855
2.23674	0.053096	0.052475	0.052935	0.053016	0.052851	0.053076	0.0536244			2.23674
2.24493	0.053094	0.052472	0.052934	0.053012	0.052847	0.053072	0.0536252			2.24493
2.25312	0.05309	0.052472	0.052934	0.053013	0.052846	0.053068	0.0536251			2.25312
2.26131	0.05309	0.052472	0.052933	0.053016	0.052848	0.05307	0.0536226			2.26131
2.2695	0.05309	0.052474	0.052934	0.053014	0.05285	0.053076	0.053617			2.2695
2.27769	0.053092	0.052478	0.052934	0.053013	0.052851	0.053078	0.0536075			2.27769
2.28588	0.053098	0.052482	0.052934	0.053013	0.052848	0.053076	0.0535979			2.28588
2.29407	0.053102	0.052486	0.052936	0.053013	0.052848	0.053076	0.0535965			2.29407
2.30226	0.053107	0.052486	0.052937	0.053014	0.052851	0.053077	0.0535984			2.30226
2.31045	0.053107	0.052481	0.052937	0.053015	0.052851	0.053076	0.0536006			2.31045
2.31864	0.053101	0.052478	0.052937	0.053013	0.052853	0.053077	0.0536043			2.31864
2.32683	0.053098	0.052475	0.05293	0.05301	0.052852	0.053075	0.0535993			2.32683
2.33502	0.053094	0.052475	0.052927	0.053012	0.05285	0.053072	0.0535902			2.33502
2.34321	0.053094	0.052474	0.05293	0.053011	0.052854	0.053076	0.0535837			2.34321
2.3514	0.053093	0.052476	0.052928	0.05301	0.052859	0.053078	0.0535809			2.3514
2.35959	0.053095	0.052478	0.052928	0.053007	0.052863	0.053078	0.0535787			2.35959
2.36777	0.053097	0.052479	0.052927	0.053008	0.052863	0.053081	0.0535741			2.36777
2.37596	0.053099	0.052482	0.052929	0.053014	0.052858	0.053081	0.0535715			2.37596
2.38415	0.053102	0.052486	0.052933	0.053018	0.052852	0.053081	0.0535697			2.38415
2.39234	0.053107	0.052483	0.052934	0.053016	0.052846	0.053082	0.0535686			2.39234
2.40053	0.053104	0.05248	0.052935	0.053014	0.052843	0.05308	0.0535715			2.40053
2.40872	0.0531	0.05248	0.052935	0.053018	0.052844	0.053079	0.0535774			2.40872
2.41691	0.0531	0.052478	0.052931	0.053019	0.052845	0.053085	0.0535818			2.41691
2.4251	0.053098	0.05248	0.052931	0.053016	0.052847	0.053084	0.0535861			2.4251
2.43329	0.0531	0.052483	0.052933	0.053016	0.052851	0.053083	0.0535855			2.43329
2.44148	0.053104	0.052485	0.052936	0.053016	0.052853	0.053083	0.0535774			2.44148
2.44967	0.053106	0.052482	0.052931	0.053017	0.052851	0.05308	0.0535693			2.44967
2.45786	0.053102	0.05248	0.052928	0.05302	0.05285	0.053077	0.053561			2.45786
2.46605	0.0531	0.05248	0.052929	0.053015	0.052848	0.053076	0.0535568			2.46605
2.47424	0.0531	0.052482	0.052929	0.053015	0.052846	0.053075	0.0535567			2.47424
2.48243	0.053102	0.052482	0.052929	0.053019	0.052847	0.053076	0.0535555			2.48243
2.49062	0.053103	0.052482	0.052934	0.053018	0.052848	0.053077	0.0535552			2.49062
2.49881	0.053102	0.052486	0.052937	0.053014	0.052849	0.053078	0.0535539			2.49881
2.507	0.053107	0.052488	0.052939	0.053014	0.052847	0.053078	0.0535504			2.507
2.51519	0.05311	0.052488	0.052941	0.053018	0.052846	0.053076	0.0535489			2.51519
2.52338	0.05311	0.052488	0.052936	0.053015	0.052847	0.053078	0.0535498			2.52338
2.53157	0.05311	0.052486	0.052931	0.053014	0.052849	0.053085	0.0535511			2.53157
2.53976	0.053107	0.052485	0.052929	0.053018	0.052848	0.053087	0.053551			2.53976
2.54795	0.053106	0.052484	0.052928	0.053025	0.052844	0.053086	0.0535528			2.54795
2.55614	0.053105	0.05248	0.05293	0.053028	0.052842	0.053082	0.0535555			2.55614
2.56433	0.0531	0.052479	0.052934	0.053026	0.052847	0.053081	0.0535536			2.56433
2.57252	0.053099	0.052478	0.052934	0.053024	0.052848	0.053081	0.0535531			2.57252
2.58071	0.053098	0.05248	0.052934	0.05302	0.052844	0.053082	0.0535557			2.58071
2.5889	0.0531	0.052485	0.052933	0.053014	0.052845	0.053084	0.0535562			2.5889
2.59709	0.053106	0.052482	0.052931	0.053011	0.052851	0.053088	0.053555			2.59709
2.60528	0.053102	0.05248	0.05293	0.053011	0.052854	0.053091	0.0535521			2.60528
2.61347	0.0531	0.052487	0.052931	0.053011	0.052853	0.053087	0.0535456			2.61347
2.62166	0.053109	0.05249	0.052931	0.053012	0.052851	0.053087	0.0535373			2.62166
2.62985	0.053113	0.05249	0.052931	0.053016	0.052846	0.053084	0.0535326			2.62985
2.63804	0.053112	0.052488	0.052931	0.053014	0.052846	0.053078	0.0535329			2.63804
2.64623	0.05311	0.052486	0.052928	0.053009	0.05285	0.05308	0.0535355			2.64623
2.65442	0.053107	0.052483	0.052921	0.053007	0.05285	0.05308	0.0535361			2.65442
2.66261	0.053104	0.052482	0.052917	0.053006	0.052847	0.05308	0.0535354			2.66261
2.6708	0.053102	0.052481	0.052919	0.053006	0.052842	0.053081	0.0535357			2.6708
2.67899	0.053101	0.05248	0.052919	0.053009	0.052841	0.053083	0.0535377			2.67899
2.68718	0.0531	0.052483	0.052918	0.053013	0.052841	0.053082	0.0535358			2.68718
2.69537	0.053104	0.052484	0.052917	0.053015	0.052838	0.053078	0.0535296			2.69537
2.70356	0.053105	0.052482	0.052915	0.053017	0.052838	0.053081	0.0535268			2.70356
2.71175	0.053102	0.052482	0.052916	0.053018	0.052843	0.053081	0.0535236			2.71175
2.71994	0.053102	0.052485	0.052921	0.053017	0.052844	0.053078	0.0535185			2.71994
2.72813	0.053106	0.052489	0.052922	0.053018	0.052846	0.05308	0.0535145			2.72813
2.73631	0.053111	0.05249	0.052924	0.05302	0.052852	0.053081	0.0535159			2.73631
2.74451	0.053112	0.05249	0.052924	0.053016	0.052854	0.053078	0.0535203			2.74451
2.7527	0.053112	0.052492	0.052921	0.05301	0.052853	0.053079	0.0535172			2.7527
2.76089	0.053115	0.052493	0.052921	0.053013	0.052854	0.053081	0.0535146			2.76089
2.76907	0.053116	0.05249	0.052921	0.053016	0.052854	0.053081	0.0535171			2.76907
2.77726	0.053113	0.052489	0.052922	0.053014	0.052855	0.053078	0.0535143			2.77726
2.78545	0.053111	0.05249	0.052923	0.053011	0.052856	0.053077	0.0535103			2.78545
2.79364	0.053112	0.052486	0.052923	0.053007	0.052856	0.053077	0.0535107			2.79364
2.80183	0.053107	0.052486	0.052918	0.053009	0.052855	0.053079	0.0535094			2.80183
2.81002	0.053107	0.05249	0.052915	0.053009	0.052855	0.053085	0.0535087			2.81002
2.81821	0.053112	0.052487	0.052913	0.053009	0.052855	0.053085	0.0535119			2.81821
2.8264	0.053109	0.052488	0.05291	0.053012	0.052854	0.053084	0.0535097			2.8264
2.83459	0.05311	0.05249	0.052909	0.053013	0.052853	0.053084	0.0535061			2.83459
2.84278	0.053112	0.052489	0.052914	0.053015	0.052851	0.053084	0.0535058			2.84278
2.85097	0.053111	0.052489	0.052919	0.053015	0.052849	0.053081	0.0535022			2.85097
2.85916	0.053111	0.052494	0.052919	0.053014	0.052843	0.053077	0.0535025			2.85916
2.86735	0.053118	0.052494	0.052918	0.053013	0.052839	0.053074	0.0535055			2.86735
2.87554	0.053118	0.05249	0.052919	0.053009	0.052841	0.053072	0.0535065			2.87554
2.88373	0.053113	0.05249	0.052918	0.053008	0.052842	0.053067	0.0535038			2.88373
2.89192	0.053112	0.052489	0.052917	0.053011	0.052841	0.053065	0.0534952			2.89192
2.90011	0.053111	0.052487	0.052918	0.053011	0.052841	0.053072	0.0534882			2.90011
2.9083	0.053109	0.05249	0.052917	0.053011	0.052843	0.053074	0.0534833			2.9083
2.91649	0.053113	0.052492	0.052917	0.053013	0.052844	0.053074	0.0534787			2.91649
2.92468	0.053115	0.05249	0.052915	0.053015	0.052843	0.053072	0.053477			2.92468
2.93287	0.053113	0.052487	0.052911	0.053015	0.052844	0.053073	0.0534762			2.93287
2.94106	0.053109	0.052486	0.05291	0.053015	0.052843	0.053079	0.0534766			2.94106
2.94925	0.053108	0.052485	0.052912	0.053016	0.052844	0.053081	0.0534778			2.94925
2.95744	0.053106	0.052482	0.052913	0.053017	0.052849	0.053081	0.0534774			2.95744
2.96563	0.053102	0.052482	0.052915	0.053017	0.052852	0.05308	0.0534751			2.96563
2.97382	0.053103	0.052482	0.052918	0.053015	0.052853	0.053079	0.0534728			2.97382
2.98201	0.053102	0.052488	0.052919	0.053014	0.052852	0.05308	0.0534751			2.98201
2.9902	0.05311	0.052492	0.052919	0.053009	0.052847	0.053083	0.0534767			2.9902
2.99839	0.053115	0.052493	0.052919	0.053011	0.052845	0.053086	0.0534778			2.99839
3.00658	0.053116	0.052496	0.052915	0.053015	0.052847	0.053088	0.053476			3.00658
3.01477	0.05312	0.052497	0.052914	0.053011	0.05285	0.053089	0.0534677			3.01477
3.02296	0.053121	0.052496	0.052918	0.053007	0.052852	0.053088	0.0534619			3.02296
3.03115	0.05312	0.052494	0.05292	0.053005	0.052847	0.053089	0.0534637			3.03115
3.03934	0.053118	0.052494	0.052922	0.053007	0.052844	0.053089	0.0534673			3.03934
3.04753	0.053117	0.052494	0.052925	0.053011	0.052841	0.053086	0.0534695			3.04753
3.05572	0.053118	0.052493	0.052929	0.053013	0.052841	0.053086	0.0534707			3.05572
3.06391	0.053116	0.052491	0.052928	0.053011	0.052843	0.053087	0.0534701			3.06391
3.0721	0.053114	0.052492	0.052924	0.053011	0.052846	0.053086	0.0534701			3.0721
3.08029	0.053115	0.052493	0.052923	0.053012	0.052851	0.053088	0.0534692			3.08029
3.08848	0.053116	0.052494	0.052921	0.053011	0.052853	0.053089	0.0534679			3.08848
3.09667	0.053117	0.052494	0.052919	0.053007	0.052852	0.053088	0.0534662			3.09667
3.10486	0.053117	0.052493	0.052919	0.053009	0.052851	0.053086	0.0534621			3.10486
3.11305	0.053116	0.052494	0.052923	0.053012	0.052849	0.053083	0.0534592			3.11305
3.12123	0.053117	0.052492	0.052926	0.053013	0.052848	0.053083	0.0534556			3.12123
3.12942	0.053115	0.052491	0.052927	0.053018	0.052846	0.05308	0.0534519			3.12942
3.13761	0.053114	0.052492	0.052924	0.05302	0.052846	0.053081	0.0534532			3.13761
3.14581	0.053115	0.052494	0.052919	0.053014	0.052848	0.053086	0.0534554			3.14581
3.15399	0.053117	0.052493	0.052916	0.053011	0.052849	0.053088	0.053454			3.15399
3.16218	0.053116	0.05249	0.052913	0.053012	0.052848	0.053089	0.0534528			3.16218
3.17037	0.053113	0.052487	0.052915	0.053013	0.052848	0.053087	0.0534543			3.17037
3.17856	0.053109	0.052486	0.05292	0.053014	0.052854	0.05309	0.0534595			3.17856
3.18675	0.053108	0.052491	0.05292	0.053013	0.05286	0.053089	0.0534643			3.18675
3.19494	0.053114	0.052493	0.052918	0.053014	0.05286	0.053081	0.0534654			3.19494
3.20313	0.053116	0.052491	0.052917	0.053011	0.052855	0.053079	0.0534679			3.20313
3.21132	0.053114	0.052492	0.052917	0.053011	0.052849	0.05308	0.0534682			3.21132
3.21951	0.053115	0.052494	0.052916	0.053018	0.052844	0.053082	0.0534657			3.21951
3.2277	0.053117	0.052494	0.052914	0.053017	0.052841	0.053082	0.0534628			3.2277
3.23589	0.053117	0.052493	0.052915	0.053011	0.052842	0.053078	0.0534584			3.23589
3.24408	0.053116	0.052491	0.052918	0.053013	0.052845	0.053077	0.0534517			3.24408
3.25227	0.053114	0.052488	0.05292	0.053018	0.052845	0.053076	0.053445			3.25227
3.26046	0.05311	0.052489	0.052921	0.053018	0.052845	0.053077	0.0534426			3.26046
3.26865	0.053111	0.05249	0.052922	0.053018	0.052844	0.053082	0.0534443			3.26865
3.27684	0.053112	0.052491	0.052926	0.053022	0.05284	0.053081	0.0534488			3.27684
3.28503	0.053114	0.052494	0.052927	0.053026	0.052838	0.053079	0.0534534			3.28503
3.29322	0.053117	0.052494	0.052924	0.053024	0.05284	0.053079	0.0534536			3.29322
3.30141	0.053117	0.052494	0.052917	0.053021	0.052842	0.053077	0.0534527			3.30141
3.3096	0.053117	0.052493	0.052912	0.053016	0.052845	0.053077	0.0534484			3.3096
3.31779	0.053116	0.052492	0.052912	0.053017	0.05285	0.053082	0.0534401			3.31779
3.32598	0.053115	0.052493	0.052913	0.053021	0.052852	0.053082	0.0534337			3.32598
3.33417	0.053116	0.052494	0.052916	0.053021	0.052853	0.053082	0.0534301			3.33417
3.34236	0.053117	0.052494	0.052916	0.053021	0.052854	0.053086	0.0534299			3.34236
3.35055	0.053117	0.052495	0.052914	0.053027	0.052851	0.05309	0.0534295			3.35055
3.35874	0.053119	0.052491	0.052916	0.053021	0.052847	0.053088	0.0534348			3.35874
3.36693	0.053114	0.05249	0.052919	0.053013	0.052846	0.053085	0.053441			3.36693
3.37512	0.053113	0.052491	0.052919	0.05301	0.052847	0.053081	0.0534424			3.37512
3.38331	0.053114	0.05249	0.05292	0.053011	0.052846	0.053078	0.0534429			3.38331
3.3915	0.053113	0.052487	0.052922	0.053012	0.052846	0.053083	0.0534399			3.3915
3.39969	0.053109	0.052486	0.052921	0.053013	0.052848	0.053084	0.0534352			3.39969
3.40788	0.053108	0.05249	0.052918	0.05301	0.052848	0.053079	0.0534356			3.40788
3.41607	0.053112	0.052489	0.052918	0.053011	0.052848	0.053078	0.0534388			3.41607
3.42426	0.053111	0.052492	0.052921	0.053018	0.052847	0.053081	0.0534425			3.42426
3.43245	0.053115	0.052496	0.052921	0.053019	0.052848	0.053082	0.0534473			3.43245
3.44064	0.05312	0.052496	0.052917	0.053016	0.052849	0.053083	0.0534478			3.44064
3.44883	0.05312	0.052498	0.052919	0.053013	0.052846	0.053083	0.0534427			3.44883
3.45702	0.053123	0.0525	0.052918	0.053014	0.052844	0.053081	0.0534361			3.45702
3.46521	0.053125	0.0525	0.052915	0.053018	0.052843	0.053076	0.0534294			3.46521
3.4734	0.053125	0.052502	0.052913	0.053022	0.052844	0.053075	0.0534228			3.4734
3.48159	0.053127	0.052499	0.052914	0.053024	0.052848	0.053078	0.0534187			3.48159
3.48977	0.053124	0.052494	0.052917	0.05302	0.052849	0.053077	0.053418			3.48977
3.49797	0.053117	0.052493	0.052919	0.053016	0.05285	0.053074	0.0534192			3.49797
3.50616	0.053116	0.052497	0.052927	0.053016	0.052851	0.053074	0.0534208			3.50616
3.51435	0.053121	0.052496	0.052932	0.053016	0.052847	0.053074	0.0534223			3.51435
3.52253	0.05312	0.052495	0.05293	0.053017	0.052845	0.053072	0.053425			3.52253
3.53072	0.053119	0.052497	0.052927	0.053022	0.052846	0.053075	0.0534284			3.53072
3.53891	0.053121	0.052496	0.052926	0.05302	0.052846	0.053072	0.053426			3.53891
3.5471	0.05312	0.052494	0.052926	0.053018	0.052847	0.053073	0.053423			3.5471
3.55529	0.053118	0.052492	0.052928	0.053018	0.052846	0.053075	0.0534227			3.55529
3.56348	0.053115	0.052491	0.052926	0.053019	0.052844	0.053074	0.0534216			3.56348
3.57167	0.053114	0.052491	0.052922	0.053021	0.052845	0.053076	0.0534221			3.57167
3.57986	0.053114	0.052492	0.052923	0.05302	0.052846	0.053076	0.0534238			3.57986
3.58805	0.053115	0.052492	0.052923	0.053018	0.052848	0.05308	0.0534265			3.58805
3.59624	0.053115	0.052493	0.052925	0.053017	0.05285	0.053082	0.0534288			3.59624
3.60443	0.053116	0.052497	0.052927	0.053021	0.052853	0.05308	0.0534266			3.60443
3.61262	0.053121	0.052499	0.052925	0.053023	0.052853	0.053078	0.0534231			3.61262
3.62081	0.053124	0.052498	0.052919	0.053024	0.052849	0.053079	0.0534191			3.62081
3.629	0.053122	0.052491	0.052912	0.053018	0.052845	0.05308	0.0534143			3.629
3.63719	0.053114	0.052488	0.052907	0.053013	0.052841	0.053078	0.0534106			3.63719
3.64538	0.05311	0.05249	0.052906	0.053015	0.052838	0.053077	0.053409			3.64538
3.65357	0.053112	0.052494	0.052909	0.053016	0.05284	0.053075	0.0534077			3.65357
3.66176	0.053117	0.052495	0.052912	0.053021	0.052842	0.053077	0.053406			3.66176
3.66995	0.053119	0.052496	0.052917	0.053022	0.052844	0.053081	0.05341			3.66995
3.67814	0.05312	0.052499	0.052921	0.053022	0.052848	0.053079	0.0534139			3.67814
3.68633	0.053124	0.052502	0.052922	0.05302	0.052847	0.053076	0.0534149			3.68633
3.69452	0.053128	0.0525	0.052921	0.053018	0.052842	0.05307	0.0534174			3.69452
3.70271	0.053125	0.052495	0.052921	0.053018	0.052839	0.053069	0.0534218			3.70271
3.7109	0.053119	0.052492	0.052924	0.053022	0.05284	0.053071	0.0534241			3.7109
3.71909	0.053115	0.052493	0.052926	0.053023	0.052842	0.053073	0.0534213			3.71909
3.72728	0.053116	0.052494	0.052927	0.053021	0.052843	0.053072	0.0534173			3.72728
3.73547	0.053118	0.052494	0.052924	0.053023	0.052846	0.053071	0.053413			3.73547
3.74366	0.053117	0.052496	0.052923	0.053019	0.052847	0.053074	0.0534108			3.74366
3.75185	0.05312	0.052499	0.052924	0.053012	0.052846	0.053075	0.0534115			3.75185
3.76004	0.053124	0.0525	0.052921	0.053007	0.052844	0.053075	0.0534104			3.76004
3.76823	0.053125	0.0525	0.052921	0.053009	0.05284	0.053078	0.0534084			3.76823
3.77642	0.053125	0.052497	0.052923	0.053013	0.052838	0.053082	0.0534073			3.77642
3.78461	0.053121	0.052497	0.052927	0.053013	0.052842	0.053081	0.0534039			3.78461
3.7928	0.053121	0.0525	0.052928	0.053012	0.052846	0.05308	0.0534021			3.7928
3.80099	0.053125	0.0525	0.052927	0.053011	0.052842	0.053079	0.0534057			3.80099
3.80918	0.053125	0.052498	0.052922	0.053011	0.052841	0.053073	0.0534104			3.80918
3.81737	0.053123	0.052495	0.052915	0.05301	0.052842	0.053071	0.0534153			3.81737
3.82556	0.053119	0.052493	0.052914	0.053012	0.052845	0.05307	0.0534185			3.82556
3.83375	0.053116	0.052492	0.052915	0.053013	0.052849	0.053068	0.053419			3.83375
3.84194	0.053115	0.052489	0.052914	0.053013	0.052846	0.053067	0.0534187			3.84194
3.85013	0.053111	0.052488	0.052913	0.053013	0.05284	0.053067	0.0534183			3.85013
3.85832	0.05311	0.05249	0.052914	0.053015	0.052838	0.053069	0.0534193			3.85832
3.86651	0.053113	0.05249	0.052916	0.053015	0.052837	0.053072	0.0534194			3.86651
3.8747	0.053112	0.052488	0.052914	0.053014	0.052837	0.053077	0.0534146			3.8747
3.88288	0.05311	0.05249	0.05291	0.053016	0.052839	0.053078	0.0534098			3.88288
3.89107	0.053113	0.052491	0.052911	0.05302	0.052839	0.053077	0.0534093			3.89107
3.89927	0.053114	0.052492	0.05291	0.053018	0.05284	0.053076	0.0534103			3.89927
3.90746	0.053115	0.052492	0.052908	0.053015	0.052842	0.053071	0.0534137			3.90746
3.91564	0.053115	0.052492	0.052909	0.053016	0.052843	0.053068	0.0534181			3.91564
3.92383	0.053115	0.052493	0.052914	0.053018	0.052843	0.053071	0.0534162			3.92383
3.93202	0.053116	0.052489	0.052918	0.053022	0.052842	0.053074	0.0534128			3.93202
3.94021	0.053111	0.052486	0.05292	0.053026	0.052842	0.053072	0.0534106			3.94021
3.9484	0.053107	0.052483	0.052922	0.053027	0.052841	0.053076	0.0534063			3.9484
3.95659	0.053104	0.052482	0.052921	0.05302	0.052842	0.053081	0.0534025			3.95659
3.96478	0.053103	0.052487	0.052918	0.053013	0.052844	0.053078	0.053404			3.96478
3.97297	0.053109	0.052492	0.052918	0.053014	0.052846	0.053077	0.0534106			3.97297
3.98116	0.053115	0.05249	0.052919	0.053013	0.052849	0.053073	0.0534124			3.98116
3.98935	0.053113	0.052486	0.05292	0.053013	0.05285	0.05307	0.0534087			3.98935
3.99754	0.053108	0.052486	0.052919	0.053017	0.052849	0.05307	0.0534069			3.99754
4.00573	0.053108	0.05249	0.052917	0.053018	0.052849	0.053076	0.0534073			4.00573
4.01392	0.053113	0.052494	0.052918	0.053015	0.052849	0.053078	0.0534067			4.01392
4.02211	0.053118	0.052498	0.052919	0.053014	0.052852	0.053075	0.0534069			4.02211
4.0303	0.053122	0.0525	0.052918	0.053015	0.052852	0.053074	0.0534077			4.0303
4.03849	0.053125	0.052499	0.052921	0.053017	0.05285	0.053077	0.0534058			4.03849
4.04668	0.053124	0.052496	0.052925	0.05302	0.052847	0.053077	0.0534047			4.04668
4.05487	0.05312	0.052495	0.052925	0.053023	0.052844	0.053076	0.053408			4.05487
4.06306	0.053119	0.052498	0.052921	0.053019	0.052845	0.053076	0.0534094			4.06306
4.07125	0.053122	0.052496	0.052918	0.053019	0.052844	0.053078	0.053406			4.07125
4.07944	0.05312	0.052494	0.052917	0.053024	0.052843	0.053077	0.0534031			4.07944
4.08763	0.053117	0.052494	0.052917	0.053023	0.052842	0.053074	0.0534002			4.08763
4.09582	0.053117	0.052493	0.052916	0.053024	0.052844	0.053072	0.0534004			4.09582
4.10401	0.053116	0.052494	0.052913	0.053026	0.052844	0.053069	0.0533996			4.10401
4.1122	0.053117	0.052497	0.052916	0.053021	0.052842	0.053065	0.0533933			4.1122
4.12039	0.053121	0.052498	0.05292	0.053021	0.052839	0.053068	0.0533886			4.12039
4.12858	0.053122	0.052496	0.052921	0.053024	0.052836	0.053073	0.0533847			4.12858
4.13677	0.05312	0.052496	0.05292	0.053022	0.052837	0.053072	0.0533838			4.13677
4.14496	0.05312	0.052498	0.052921	0.053025	0.052842	0.053071	0.0533832			4.14496
4.15315	0.053122	0.052496	0.052923	0.05303	0.052844	0.053075	0.0533836			4.15315
4.16134	0.05312	0.052494	0.05292	0.05303	0.052842	0.053081	0.0533897			4.16134
4.16953	0.053117	0.052494	0.052917	0.053031	0.052845	0.053082	0.0533929			4.16953
4.17772	0.053117	0.052496	0.052919	0.053028	0.05285	0.053079	0.0533933			4.17772
4.18591	0.05312	0.052498	0.052918	0.053022	0.052852	0.053075	0.0533966			4.18591
4.1941	0.053122	0.052496	0.052916	0.053021	0.052849	0.053077	0.0533975			4.1941
4.20229	0.05312	0.052498	0.052918	0.053025	0.052845	0.053083	0.053394			4.20229
4.21048	0.053122	0.052499	0.052921	0.053026	0.052841	0.053084	0.0533936			4.21048
4.21867	0.053124	0.052496	0.05292	0.053021	0.052839	0.053081	0.0533958			4.21867
4.22686	0.05312	0.052493	0.052919	0.053019	0.052837	0.053078	0.0533962			4.22686
4.23505	0.053116	0.052494	0.052919	0.053019	0.052841	0.053078	0.0533962			4.23505
4.24324	0.053117	0.052494	0.052918	0.05302	0.052845	0.053076	0.0533947			4.24324
4.25143	0.053117	0.052494	0.052919	0.053019	0.052846	0.053076	0.0533919			4.25143
4.25962	0.053117	0.052496	0.05292	0.05302	0.052849	0.053081	0.0533918			4.25962
4.26781	0.05312	0.052498	0.052924	0.053027	0.052853	0.05308	0.0533893			4.26781
4.27599	0.053123	0.052501	0.052924	0.05303	0.052854	0.053073	0.0533853			4.27599
4.28418	0.053126	0.052503	0.05292	0.053026	0.052851	0.053073	0.0533854			4.28418
4.29237	0.053129	0.052502	0.052914	0.053023	0.052846	0.053075	0.053388			4.29237
4.30056	0.053128	0.0525	0.052912	0.053025	0.052843	0.053075	0.0533878			4.30056
4.30875	0.053125	0.0525	0.052918	0.053023	0.052841	0.053079	0.0533841			4.30875
4.31694	0.053125	0.052502	0.052923	0.053023	0.052837	0.053085	0.0533807			4.31694
4.32513	0.053127	0.052501	0.052924	0.053024	0.052836	0.053086	0.0533787			4.32513
4.33332	0.053126	0.052499	0.052924	0.053022	0.052841	0.053085	0.053377			4.33332
4.34151	0.053124	0.052499	0.052925	0.053026	0.052844	0.053088	0.0533733			4.34151
4.3497	0.053124	0.052497	0.052925	0.053028	0.052844	0.053088	0.0533713			4.3497
4.35789	0.053121	0.052493	0.052924	0.053025	0.052842	0.053083	0.053372			4.35789
4.36608	0.053116	0.052492	0.052924	0.053027	0.052841	0.053083	0.0533739			4.36608
4.37427	0.053115	0.052496	0.052925	0.053031	0.052842	0.053085	0.0533756			4.37427
4.38246	0.05312	0.052496	0.05292	0.053028	0.052843	0.053084	0.0533754			4.38246
4.39065	0.05312	0.052495	0.052917	0.053027	0.052838	0.053084	0.0533758			4.39065
4.39884	0.053119	0.052496	0.05292	0.053023	0.052835	0.053087	0.0533766			4.39884
4.40703	0.05312	0.052496	0.052922	0.053019	0.052836	0.053089	0.0533781			4.40703
4.41522	0.05312	0.052496	0.052922	0.05302	0.052839	0.053089	0.0533793			4.41522
4.42341	0.05312	0.052495	0.052924	0.053018	0.05284	0.053084	0.0533809			4.42341
4.4316	0.053119	0.052493	0.052926	0.053017	0.052841	0.053079	0.0533829			4.4316
4.43979	0.053116	0.052493	0.052923	0.053021	0.052845	0.053079	0.0533793			4.43979
4.44798	0.053116	0.052494	0.05292	0.053023	0.052845	0.053081	0.053377			4.44798
4.45617	0.053118	0.052497	0.052922	0.053022	0.052843	0.05308	0.0533783			4.45617
4.46436	0.053121	0.052501	0.052923	0.05302	0.05284	0.053082	0.0533766			4.46436
4.47255	0.053126	0.052499	0.052925	0.053018	0.052837	0.053085	0.0533719			4.47255
4.48074	0.053124	0.052495	0.052929	0.053016	0.052838	0.053086	0.0533686			4.48074
4.48893	0.053119	0.052494	0.052932	0.053013	0.052839	0.053086	0.0533629			4.48893
4.49712	0.053118	0.052494	0.052929	0.053018	0.05284	0.053089	0.0533577			4.49712
4.50531	0.053118	0.052495	0.052926	0.053023	0.052841	0.053089	0.0533577			4.50531
4.5135	0.053119	0.052494	0.052926	0.053025	0.052841	0.053085	0.0533573			4.5135
4.52169	0.053118	0.052491	0.052926	0.053026	0.05284	0.053087	0.0533578			4.52169
4.52988	0.053114	0.052494	0.052924	0.053024	0.052841	0.053086	0.053362			4.52988
4.53807	0.053118	0.052494	0.052919	0.053023	0.052844	0.05308	0.0533688			4.53807
4.54626	0.053117	0.052492	0.05292	0.05302	0.052846	0.05308	0.0533709			4.54626
4.55445	0.053115	0.052493	0.052924	0.053017	0.052848	0.053081	0.0533718			4.55445
4.56264	0.053116	0.052492	0.052922	0.053018	0.052846	0.053082	0.0533748			4.56264
4.57083	0.053115	0.052493	0.052919	0.053018	0.052841	0.053081	0.0533753			4.57083
4.57902	0.053116	0.052494	0.052919	0.053021	0.052837	0.053079	0.0533769			4.57902
4.58721	0.053117	0.052495	0.052922	0.053023	0.052837	0.053077	0.0533789			4.58721
4.5954	0.053119	0.052494	0.052926	0.053026	0.052838	0.053079	0.0533805			4.5954
4.60359	0.053118	0.052494	0.052927	0.053027	0.05284	0.053082	0.0533809			4.60359
4.61178	0.053117	0.052498	0.052929	0.053027	0.052844	0.053082	0.0533766			4.61178
4.61997	0.053122	0.0525	0.052935	0.053027	0.052844	0.053085	0.0533716			4.61997
4.62816	0.053125	0.052498	0.052934	0.053026	0.052845	0.053088	0.0533663			4.62816
4.63635	0.053122	0.052497	0.052931	0.053027	0.052849	0.053083	0.0533639			4.63635
4.64454	0.053121	0.052498	0.05293	0.053027	0.052847	0.053082	0.0533636			4.64454
4.65273	0.053122	0.052498	0.052929	0.053022	0.052843	0.053088	0.0533603			4.65273
4.66092	0.053122	0.052498	0.052928	0.053018	0.052841	0.053089	0.0533621			4.66092
4.6691	0.053123	0.052501	0.052932	0.053021	0.052842	0.053087	0.0533658			4.6691
4.67729	0.053126	0.052499	0.052931	0.053023	0.05284	0.053087	0.0533636			4.67729
4.68548	0.053124	0.052496	0.052927	0.053024	0.052836	0.053088	0.0533615			4.68548
4.69367	0.05312	0.052495	0.052924	0.053025	0.052839	0.053089	0.05336			4.69367
4.70186	0.053119	0.052493	0.052924	0.053022	0.052843	0.053089	0.0533583			4.70186
4.71005	0.053116	0.052492	0.052925	0.053023	0.052844	0.053086	0.0533604			4.71005
4.71824	0.053115	0.052492	0.05292	0.053028	0.052847	0.053084	0.0533611			4.71824
4.72643	0.053115	0.052494	0.052916	0.05303	0.05285	0.053087	0.0533608			4.72643
4.73462	0.053118	0.052494	0.052915	0.053032	0.052847	0.053086	0.0533622			4.73462
4.74281	0.053118	0.052494	0.052917	0.053028	0.052841	0.053084	0.0533605			4.74281
4.751	0.053117	0.052495	0.052923	0.053026	0.052838	0.05308	0.0533581			4.751
4.75919	0.053119	0.052496	0.052931	0.053028	0.052838	0.053079	0.0533582			4.75919
4.76738	0.05312	0.052498	0.052935	0.053026	0.052836	0.053086	0.0533604			4.76738
4.77557	0.053122	0.052498	0.052936	0.053024	0.052835	0.053088	0.0533612			4.77557
4.78376	0.053122	0.052495	0.052934	0.053025	0.052838	0.053085	0.0533586			4.78376
4.79195	0.053119	0.052494	0.05293	0.053025	0.052844	0.053086	0.0533591			4.79195
4.80014	0.053118	0.052495	0.052929	0.053024	0.052844	0.05309	0.0533571			4.80014
4.80833	0.053119	0.052491	0.052927	0.053024	0.05284	0.053089	0.0533513			4.80833
4.81652	0.053114	0.052489	0.052928	0.053026	0.052837	0.053085	0.0533473			4.81652
4.82471	0.053111	0.052493	0.052932	0.053023	0.052835	0.053083	0.0533482			4.82471
4.8329	0.053116	0.052494	0.052934	0.053016	0.052836	0.053085	0.0533522			4.8329
4.84109	0.053117	0.052492	0.052934	0.053017	0.052838	0.053088	0.0533539			4.84109
4.84928	0.053115	0.052492	0.052935	0.053018	0.05284	0.053086	0.0533549			4.84928
4.85747	0.053115	0.052494	0.052934	0.053018	0.052845	0.053085	0.053354			4.85747
4.86566	0.053117	0.052493	0.052929	0.053019	0.05285	0.053085	0.0533508			4.86566
4.87385	0.053116	0.052495	0.052926	0.053021	0.052853	0.053084	0.0533457			4.87385
4.88204	0.053119	0.052494	0.052929	0.053025	0.052857	0.053085	0.0533447			4.88204
4.89023	0.053118	0.05249	0.052928	0.053031	0.052858	0.053089	0.0533444			4.89023
4.89842	0.053113	0.052494	0.052926	0.053038	0.052855	0.053089	0.0533431			4.89842
4.90661	0.053118	0.052494	0.052924	0.053037	0.052854	0.053089	0.0533445			4.90661
4.9148	0.053118	0.052492	0.052919	0.053031	0.052853	0.053087	0.053344			4.9148
4.92299	0.053115	0.052492	0.052915	0.053024	0.052849	0.053085	0.0533449			4.92299
4.93118	0.053115	0.05249	0.052914	0.053024	0.05285	0.053084	0.0533458			4.93118
4.93937	0.053113	0.052494	0.052918	0.053026	0.052851	0.053087	0.053345			4.93937
4.94756	0.053117	0.052498	0.052925	0.053025	0.052846	0.053089	0.0533437			4.94756
4.95575	0.053122	0.052495	0.052927	0.053025	0.052842	0.053089	0.0533413			4.95575
4.96394	0.053119	0.052493	0.052927	0.053022	0.052842	0.053089	0.0533415			4.96394
4.97213	0.053116	0.052494	0.052926	0.053023	0.052844	0.053088	0.0533409			4.97213
4.98032	0.053117	0.052494	0.052927	0.053029	0.052849	0.053089	0.0533386			4.98032
4.98851	0.053118	0.052497	0.052929	0.053032	0.052849	0.053088	0.0533397			4.98851
4.9967	0.053121	0.052498	0.052928	0.053035	0.052846	0.053087	0.0533413			4.9967
5.00489	0.053123	0.0525	0.052928	0.053031	0.052844	0.053083	0.0533401			5.00489
5.01307	0.053125	0.052502	0.052928	0.053029	0.052842	0.053086	0.0533384			5.01307
5.02126	0.053128	0.052505	0.05293	0.053031	0.052841	0.053089	0.0533336			5.02126
5.02945	0.053131	0.052506	0.052931	0.053033	0.05284	0.053083	0.0533278			5.02945
5.03765	0.053133	0.052506	0.05293	0.053036	0.05284	0.053082	0.0533279			5.03765
5.04584	0.053132	0.052502	0.052928	0.053034	0.052838	0.053082	0.0533295			5.04584
5.05402	0.053127	0.052497	0.052926	0.053032	0.052838	0.053078	0.0533285			5.05402
5.06221	0.053121	0.052497	0.052925	0.053033	0.05284	0.053079	0.0533292			5.06221
5.0704	0.053121	0.052498	0.052925	0.053032	0.052841	0.053084	0.053333			5.0704
5.07859	0.053122	0.052498	0.052927	0.05303	0.052843	0.05308	0.0533333			5.07859
5.08678	0.053122	0.0525	0.052928	0.053028	0.052843	0.053077	0.0533303			5.08678
5.09497	0.053125	0.052502	0.052926	0.053027	0.052839	0.053081	0.0533329			5.09497
5.10316	0.053127	0.052502	0.052925	0.053028	0.052838	0.053085	0.0533343			5.10316
5.11135	0.053128	0.052502	0.052928	0.05303	0.052838	0.053085	0.0533314			5.11135
5.11954	0.053128	0.052504	0.052928	0.053031	0.052836	0.053085	0.0533333			5.11954
5.12773	0.05313	0.052505	0.052926	0.053031	0.052839	0.053089	0.0533344			5.12773
5.13592	0.053131	0.052502	0.052924	0.05303	0.052845	0.053089	0.05333			5.13592
5.14411	0.053128	0.052502	0.052925	0.053028	0.052845	0.05309	0.0533248			5.14411
5.1523	0.053127	0.052502	0.052929	0.053024	0.052842	0.053089	0.0533267			5.1523
5.16049	0.053128	0.0525	0.05293	0.053025	0.052842	0.053088	0.0533315			5.16049
5.16868	0.053125	0.0525	0.052931	0.053025	0.052843	0.053088	0.0533331			5.16868
5.17687	0.053125	0.052499	0.052933	0.053022	0.052845	0.053086	0.0533343			5.17687
5.18506	0.053124	0.052499	0.052933	0.053026	0.052846	0.053085	0.0533305			5.18506
5.19325	0.053124	0.052501	0.052933	0.053032	0.052852	0.053085	0.0533259			5.19325
5.20144	0.053126	0.052501	0.052936	0.053035	0.052856	0.053086	0.0533256			5.20144
5.20963	0.053126	0.052498	0.052933	0.053038	0.05285	0.053086	0.0533254			5.20963
5.21782	0.053123	0.052499	0.052925	0.053036	0.052847	0.053083	0.0533263			5.21782
5.22601	0.053124	0.052501	0.052921	0.053033	0.052845	0.053083	0.0533262			5.22601
5.2342	0.053126	0.0525	0.052923	0.053028	0.052842	0.053085	0.0533248			5.2342
5.24239	0.053125	0.052499	0.052925	0.053026	0.052843	0.05309	0.053325			5.24239
5.25058	0.053124	0.052497	0.052927	0.053027	0.052842	0.053092	0.0533234			5.25058
5.25877	0.053121	0.052497	0.052929	0.053027	0.052839	0.053088	0.0533204			5.25877
5.26696	0.053121	0.052498	0.052927	0.053026	0.052841	0.053086	0.0533161			5.26696
5.27515	0.053122	0.052495	0.052924	0.053028	0.052842	0.053083	0.0533124			5.27515
5.28334	0.053119	0.052492	0.052925	0.053026	0.052845	0.053084	0.0533113			5.28334
5.29153	0.053115	0.052495	0.052923	0.053022	0.052848	0.053087	0.0533131			5.29153
5.29972	0.053119	0.052498	0.052921	0.053021	0.052847	0.05309	0.053317			5.29972
5.30791	0.053123	0.0525	0.052922	0.053023	0.052843	0.05309	0.053321			5.30791
5.3161	0.053125	0.052502	0.052924	0.053023	0.052841	0.053089	0.0533225			5.3161
5.32429	0.053128	0.052502	0.052928	0.053025	0.05284	0.053091	0.0533224			5.32429
5.33248	0.053128	0.052502	0.05293	0.053028	0.052842	0.053092	0.0533209			5.33248
5.34067	0.053128	0.052502	0.052927	0.053027	0.052843	0.053091	0.0533194			5.34067
5.34886	0.053127	0.052498	0.052926	0.053026	0.052841	0.053095	0.053318			5.34886
5.35705	0.053123	0.052495	0.052926	0.053027	0.052841	0.053096	0.0533137			5.35705
5.36524	0.053119	0.052496	0.052924	0.053028	0.05284	0.053099	0.0533099			5.36524
5.37343	0.05312	0.0525	0.052923	0.053027	0.052837	0.0531	0.0533088			5.37343
5.38162	0.053125	0.052498	0.052922	0.053028	0.052833	0.053096	0.0533092			5.38162
5.38981	0.053123	0.052497	0.052923	0.053028	0.052831	0.053097	0.0533078			5.38981
5.39799	0.053121	0.052497	0.052927	0.05303	0.052834	0.053096	0.0533089			5.39799
5.40618	0.053121	0.052498	0.052929	0.05303	0.052839	0.053094	0.0533116			5.40618
5.41437	0.053123	0.052502	0.052927	0.053028	0.052844	0.053096	0.0533142			5.41437
5.42256	0.053127	0.0525	0.052922	0.05303	0.052845	0.053098	0.0533191			5.42256
5.43075	0.053125	0.052498	0.052919	0.05303	0.052844	0.053096	0.0533162			5.43075
5.43894	0.053123	0.052498	0.05292	0.053031	0.052842	0.053094	0.0533127			5.43894
5.44713	0.053123	0.052498	0.052918	0.05303	0.052841	0.053094	0.0533129			5.44713
5.45532	0.053122	0.052502	0.052918	0.053025	0.05284	0.053096	0.0533102			5.45532
5.46351	0.053128	0.052502	0.052923	0.053023	0.052839	0.053095	0.053312			5.46351
5.4717	0.053127	0.0525	0.052927	0.053027	0.052841	0.053092	0.0533158			5.4717
5.47989	0.053125	0.052503	0.052934	0.05303	0.052842	0.053097	0.0533156			5.47989
5.48808	0.053129	0.052505	0.052937	0.05303	0.052842	0.053101	0.053314			5.48808
5.49627	0.053131	0.052505	0.052933	0.053029	0.052842	0.053101	0.0533106			5.49627
5.50446	0.053131	0.052502	0.052934	0.053026	0.052839	0.0531	0.053308			5.50446
5.51265	0.053128	0.052501	0.052936	0.053022	0.052837	0.053098	0.0533074			5.51265
5.52084	0.053126	0.052502	0.052935	0.053022	0.052836	0.053095	0.0533045			5.52084
5.52903	0.053128	0.052503	0.052934	0.053024	0.052835	0.053094	0.0533035			5.52903
5.53722	0.053129	0.052502	0.052934	0.053023	0.052834	0.053094	0.0533037			5.53722
5.54541	0.053127	0.052502	0.052937	0.05302	0.052833	0.053097	0.0533014			5.54541
5.5536	0.053127	0.052502	0.052934	0.053022	0.052831	0.053101	0.053301			5.5536
5.56179	0.053127	0.052499	0.052926	0.05302	0.05283	0.0531	0.0533016			5.56179
5.56998	0.053124	0.052501	0.052924	0.053018	0.052832	0.053098	0.0533017			5.56998
5.57817	0.053126	0.052503	0.052927	0.053025	0.052834	0.053096	0.0533024			5.57817
5.58636	0.053129	0.052502	0.052932	0.05303	0.052839	0.053099	0.0533006			5.58636
5.59455	0.053127	0.052499	0.052937	0.053031	0.052843	0.053099	0.0532981			5.59455
5.60274	0.053124	0.052498	0.05294	0.053028	0.052844	0.053098	0.0532985			5.60274
5.61093	0.053123	0.052502	0.052939	0.053026	0.052845	0.0531	0.0532967			5.61093
5.61912	0.053127	0.052502	0.052941	0.053023	0.052845	0.053102	0.0532951			5.61912
5.62731	0.053127	0.052498	0.05294	0.053021	0.052839	0.053105	0.0532978			5.62731
5.6355	0.053123	0.0525	0.052935	0.053023	0.052832	0.053103	0.053299			5.6355
5.64369	0.053125	0.052502	0.05293	0.053023	0.052831	0.053103	0.0532964			5.64369
5.65188	0.053127	0.052502	0.05293	0.053022	0.052832	0.053105	0.0532929			5.65188
5.66007	0.053127	0.052502	0.05293	0.053022	0.052829	0.053107	0.0532897			5.66007
5.66826	0.053127	0.052501	0.05293	0.053024	0.052827	0.053109	0.0532886			5.66826
5.67645	0.053126	0.052499	0.052929	0.053021	0.052825	0.053111	0.0532907			5.67645
5.68464	0.053124	0.052501	0.052925	0.053022	0.052824	0.053112	0.0532967			5.68464
5.69283	0.053126	0.052502	0.052925	0.053024	0.05283	0.05311	0.0533015			5.69283
5.70102	0.053128	0.052502	0.052929	0.053024	0.052838	0.053108	0.0533055			5.70102
5.70921	0.053127	0.052502	0.052932	0.053027	0.052841	0.053106	0.0533079			5.70921
5.7174	0.053127	0.052505	0.052933	0.053029	0.05284	0.053105	0.0533042			5.7174
5.72559	0.053131	0.052502	0.052933	0.053032	0.052839	0.053105	0.0533031			5.72559
5.73378	0.053128	0.052499	0.05293	0.05303	0.052838	0.053105	0.0533016			5.73378
5.74197	0.053124	0.0525	0.052928	0.053028	0.05284	0.053106	0.0532934			5.74197
5.75016	0.053125	0.052499	0.05293	0.053031	0.052842	0.053103	0.0532852			5.75016
5.75835	0.053124	0.052498	0.05293	0.053033	0.052842	0.053102	0.0532843			5.75835
5.76654	0.053123	0.052498	0.05293	0.053029	0.052841	0.053104	0.0532849			5.76654
5.77473	0.053122	0.052497	0.052927	0.053026	0.052843	0.053104	0.0532835			5.77473
5.78292	0.053121	0.052497	0.052922	0.053025	0.052845	0.053104	0.0532823			5.78292
5.7911	0.053121	0.052498	0.052923	0.053025	0.052844	0.053105	0.0532785			5.7911
5.79929	0.053123	0.0525	0.052927	0.053028	0.052845	0.053107	0.0532762			5.79929
5.80748	0.053125	0.052501	0.052927	0.053025	0.052848	0.053112	0.0532793			5.80748
5.81567	0.053126	0.052502	0.052928	0.053023	0.052847	0.053111	0.0532851			5.81567
5.82386	0.053127	0.052499	0.052931	0.053022	0.052847	0.053107	0.0532896			5.82386
5.83205	0.053124	0.052495	0.052931	0.053019	0.05285	0.053108	0.0532912			5.83205
5.84024	0.053119	0.052495	0.052931	0.05302	0.052851	0.053107	0.0532916			5.84024
5.84843	0.053119	0.052496	0.052931	0.053023	0.052847	0.053102	0.053292			5.84843
5.85662	0.05312	0.052496	0.052933	0.053024	0.052846	0.0531	0.0532896			5.85662
5.86481	0.05312	0.052497	0.052933	0.053024	0.052844	0.053105	0.053287			5.86481
5.873	0.053121	0.052498	0.052932	0.053022	0.052843	0.053107	0.0532857			5.873
5.88119	0.053122	0.052496	0.052932	0.053023	0.05284	0.05311	0.053285			5.88119
5.88938	0.05312	0.052493	0.052931	0.053023	0.05284	0.053113	0.0532824			5.88938
5.89757	0.053116	0.052495	0.052931	0.053026	0.052842	0.053108	0.0532807			5.89757
5.90576	0.053119	0.052498	0.052928	0.053028	0.052843	0.053105	0.0532798			5.90576
5.91395	0.053123	0.052498	0.052924	0.053024	0.052843	0.053105	0.0532779			5.91395
5.92214	0.053123	0.0525	0.052925	0.053023	0.052842	0.053103	0.0532779			5.92214
5.93033	0.053125	0.0525	0.052924	0.053026	0.052844	0.053098	0.053279			5.93033
5.93852	0.053125	0.052498	0.052926	0.053028	0.052843	0.053095	0.0532801			5.93852
5.94671	0.053123	0.052504	0.052932	0.053029	0.052838	0.053101	0.0532812			5.94671
5.9549	0.05313	0.052506	0.052933	0.053032	0.052838	0.053106	0.0532786			5.9549
5.96309	0.053133	0.052505	0.052933	0.053034	0.052837	0.053106	0.0532745			5.96309
5.97128	0.053131	0.052505	0.052934	0.053037	0.052833	0.053109	0.0532746			5.97128
5.97947	0.053131	0.052504	0.052931	0.053036	0.052834	0.053115	0.0532754			5.97947
5.98766	0.05313	0.052504	0.052927	0.053034	0.052837	0.053109	0.0532761			5.98766
5.99585	0.05313	0.052503	0.052922	0.053035	0.052842	0.053102	0.0532771			5.99585
6.00404	0.053129	0.052502	0.05292	0.053034	0.052847	0.053102	0.0532758			6.00404
6.01223	0.053127	0.052501	0.052922	0.053034	0.052848	0.053099	0.0532753			6.01223
6.02042	0.053126	0.0525	0.052924	0.053031	0.052852	0.053099	0.0532738			6.02042
6.02861	0.053125	0.052502	0.052925	0.053027	0.052854	0.053098	0.0532718			6.02861
6.0368	0.053128	0.052503	0.052924	0.053028	0.052853	0.053095	0.0532712			6.0368
6.04499	0.053129	0.052506	0.052923	0.053028	0.052856	0.053096	0.0532692			6.04499
6.05318	0.053133	0.052507	0.052927	0.053028	0.052854	0.053098	0.0532697			6.05318
6.06137	0.053134	0.052506	0.052931	0.053031	0.05285	0.053097	0.0532735			6.06137
6.06956	0.053133	0.052503	0.05293	0.05303	0.05285	0.053096	0.0532776			6.06956
6.07775	0.053129	0.052502	0.052931	0.05303	0.052847	0.053097	0.0532753			6.07775
6.08594	0.053127	0.052502	0.052932	0.053031	0.052838	0.053099	0.0532716			6.08594
6.09413	0.053128	0.052501	0.05293	0.053025	0.052834	0.053098	0.0532712			6.09413
6.10232	0.053126	0.052499	0.052928	0.053026	0.052834	0.053094	0.0532716			6.10232
6.11051	0.053124	0.052498	0.052928	0.053026	0.052835	0.053092	0.0532707			6.11051
6.1187	0.053123	0.052498	0.05293	0.053026	0.052836	0.053094	0.0532692			6.1187
6.12689	0.053123	0.052498	0.052933	0.053027	0.052835	0.053098	0.0532705			6.12689
6.13508	0.053123	0.052501	0.052932	0.053026	0.052834	0.053097	0.0532728			6.13508
6.14327	0.053126	0.052501	0.052932	0.053028	0.052836	0.053096	0.0532699			6.14327
6.15146	0.053126	0.052498	0.052934	0.053027	0.052837	0.053098	0.0532667			6.15146
6.15965	0.053122	0.0525	0.052934	0.053029	0.052839	0.053094	0.0532684			6.15965
6.16784	0.053125	0.052503	0.052934	0.053031	0.052842	0.053089	0.0532674			6.16784
6.17603	0.053129	0.052503	0.05293	0.053032	0.052843	0.053091	0.0532676			6.17603
6.18422	0.053129	0.052502	0.052928	0.053033	0.052845	0.053093	0.0532695			6.18422
6.1924	0.053128	0.052505	0.052928	0.05303	0.052845	0.053095	0.0532706			6.1924
6.20059	0.053131	0.052507	0.052927	0.053025	0.052845	0.053098	0.0532704			6.20059
6.20878	0.053134	0.052502	0.052923	0.053021	0.052844	0.053095	0.053269			6.20878
6.21697	0.053127	0.052498	0.052922	0.05302	0.052841	0.053096	0.0532689			6.21697
6.22516	0.053123	0.052501	0.052926	0.053022	0.05284	0.0531	0.053266			6.22516
6.23335	0.053126	0.052502	0.052928	0.053026	0.05284	0.053104	0.0532619			6.23335
6.24154	0.053127	0.052503	0.052924	0.053029	0.05284	0.0531	0.0532622			6.24154
6.24973	0.053129	0.052504	0.052923	0.05303	0.052842	0.053096	0.0532621			6.24973
6.25792	0.05313	0.052505	0.052924	0.05303	0.052843	0.053097	0.0532582			6.25792
6.26611	0.053131	0.052506	0.052924	0.053029	0.052842	0.053095	0.0532586			6.26611
6.2743	0.053132	0.052504	0.052927	0.053025	0.052842	0.053094	0.0532628			6.2743
6.28249	0.05313	0.052506	0.052929	0.053026	0.052841	0.053093	0.0532673			6.28249
6.29068	0.053132	0.052504	0.052928	0.053029	0.052842	0.053093	0.0532686			6.29068
6.29887	0.05313	0.052501	0.052926	0.05303	0.052844	0.053093	0.0532682			6.29887
6.30706	0.053126	0.052505	0.052925	0.053029	0.052846	0.053096	0.0532677			6.30706
6.31525	0.053131	0.052506	0.052924	0.05303	0.052848	0.053097	0.0532651			6.31525
6.32344	0.053133	0.052504	0.052922	0.053032	0.052848	0.053091	0.0532644			6.32344
6.33163	0.05313	0.052506	0.052922	0.053034	0.052849	0.053087	0.053264			6.33163
6.33982	0.053132	0.052507	0.052925	0.053033	0.052852	0.053087	0.0532643			6.33982
6.34801	0.053134	0.052507	0.052927	0.053031	0.052854	0.053088	0.0532621			6.34801
6.3562	0.053134	0.052506	0.05293	0.05303	0.052856	0.053083	0.0532589			6.3562
6.36439	0.053133	0.052504	0.05293	0.053029	0.052857	0.053082	0.0532595			6.36439
6.37258	0.05313	0.052503	0.052931	0.05303	0.052855	0.053084	0.0532604			6.37258
6.38077	0.053129	0.052505	0.052932	0.053031	0.052854	0.053085	0.0532609			6.38077
6.38896	0.053131	0.052502	0.052929	0.05303	0.052854	0.053087	0.0532626			6.38896
6.39715	0.053128	0.052498	0.052925	0.053029	0.052857	0.053086	0.0532661			6.39715
6.40534	0.053123	0.052502	0.052923	0.053026	0.052857	0.053085	0.0532644			6.40534
6.41353	0.053128	0.052505	0.052921	0.053027	0.052855	0.053086	0.0532586			6.41353
6.42172	0.053131	0.052503	0.052922	0.053027	0.052857	0.053085	0.0532545			6.42172
6.42991	0.053129	0.052503	0.052921	0.053025	0.052856	0.053088	0.0532519			6.42991
6.4381	0.053129	0.052502	0.052925	0.053025	0.052856	0.053095	0.0532512			6.4381
6.44629	0.053128	0.052502	0.052932	0.053025	0.052858	0.053097	0.0532493			6.44629
6.45448	0.053127	0.052502	0.052934	0.053024	0.052858	0.053095	0.053247			6.45448
6.46267	0.053128	0.052502	0.052933	0.053023	0.052856	0.053094	0.0532515			6.46267
6.47086	0.053128	0.052503	0.052933	0.053022	0.052853	0.053093	0.0532598			6.47086
6.47905	0.053129	0.052503	0.052932	0.053024	0.05285	0.05309	0.0532628			6.47905
6.48724	0.053129	0.052502	0.052929	0.053024	0.05285	0.053089	0.0532614			6.48724
6.49543	0.053128	0.052502	0.052926	0.053025	0.052852	0.05309	0.0532598			6.49543
6.50362	0.053128	0.052502	0.052923	0.053031	0.052853	0.053088	0.0532584			6.50362
6.51181	0.053128	0.052502	0.052922	0.053034	0.052854	0.05309	0.0532561			6.51181
6.52	0.053128	0.052502	0.052919	0.053033	0.052856	0.053091	0.0532558			6.52
6.52819	0.053127	0.052499	0.052918	0.053033	0.052856	0.053089	0.05326			6.52819
6.53637	0.053124	0.0525	0.05292	0.05303	0.052856	0.053089	0.0532616			6.53637
6.54457	0.053125	0.052502	0.052925	0.053027	0.052857	0.053088	0.0532586			6.54457
6.55276	0.053128	0.052502	0.052929	0.05303	0.052855	0.053088	0.0532585			6.55276
6.56095	0.053128	0.052502	0.052934	0.053026	0.052854	0.053088	0.0532591			6.56095
6.56914	0.053127	0.052502	0.05294	0.053026	0.052856	0.053093	0.0532578			6.56914
6.57732	0.053127	0.052498	0.05294	0.053029	0.052858	0.053092	0.0532556			6.57732
6.58551	0.053122	0.052498	0.052935	0.053026	0.052858	0.053087	0.0532521			6.58551
6.5937	0.053122	0.052499	0.05293	0.053027	0.052855	0.053089	0.0532507			6.5937
6.60189	0.053124	0.052501	0.052929	0.053025	0.052851	0.053089	0.0532485			6.60189
6.61008	0.053126	0.052503	0.05293	0.053022	0.052846	0.053086	0.0532444			6.61008
6.61827	0.053129	0.052505	0.052929	0.053023	0.052846	0.053087	0.0532439			6.61827
6.62646	0.053131	0.052506	0.05293	0.053022	0.05285	0.053088	0.0532468			6.62646
6.63465	0.053133	0.052504	0.052934	0.053023	0.052853	0.053093	0.0532497			6.63465
6.64284	0.05313	0.052506	0.052937	0.053022	0.052852	0.053093	0.0532512			6.64284
6.65103	0.053133	0.052508	0.052941	0.053023	0.052847	0.05309	0.0532515			6.65103
6.65922	0.053135	0.052505	0.052946	0.053026	0.052846	0.053095	0.0532506			6.65922
6.66741	0.053131	0.0525	0.052948	0.053024	0.05285	0.053095	0.0532507			6.66741
6.6756	0.053125	0.052499	0.052947	0.053024	0.052857	0.053094	0.0532495			6.6756
6.68379	0.053124	0.052502	0.052949	0.053026	0.052857	0.053095	0.0532509			6.68379
6.69198	0.053128	0.052506	0.052951	0.053029	0.052858	0.053091	0.0532549			6.69198
6.70017	0.053133	0.052506	0.05295	0.053031	0.052858	0.053089	0.0532546			6.70017
6.70836	0.053133	0.052502	0.052949	0.053031	0.052856	0.053089	0.0532525			6.70836
6.71655	0.053128	0.052502	0.052948	0.053026	0.052855	0.053087	0.0532506			6.71655
6.72474	0.053128	0.052503	0.052949	0.053023	0.052853	0.053085	0.0532528			6.72474
6.73293	0.053129	0.052504	0.052946	0.053025	0.052851	0.053085	0.0532579			6.73293
6.74112	0.05313	0.052506	0.052944	0.053026	0.052851	0.053089	0.0532618			6.74112
6.74931	0.053132	0.052503	0.052941	0.053024	0.052849	0.053093	0.0532665			6.74931
6.7575	0.053129	0.052506	0.052937	0.053025	0.052848	0.053096	0.0532688			6.7575
6.76569	0.053132	0.052509	0.052939	0.053025	0.052852	0.053098	0.0532662			6.76569
6.77388	0.053136	0.052507	0.052942	0.053023	0.052854	0.053093	0.0532653			6.77388
6.78207	0.053134	0.052505	0.052946	0.053024	0.052856	0.05309	0.0532662			6.78207
6.79026	0.053131	0.052506	0.052947	0.053026	0.052857	0.05309	0.0532664			6.79026
6.79845	0.053133	0.052508	0.052947	0.053024	0.052857	0.053093	0.0532675			6.79845
6.80664	0.053135	0.052505	0.052944	0.053023	0.052857	0.053094	0.0532676			6.80664
6.81483	0.053131	0.052504	0.052939	0.053027	0.052856	0.053094	0.0532647			6.81483
6.82302	0.05313	0.052506	0.052937	0.053029	0.052855	0.053097	0.053265			6.82302
6.83121	0.053133	0.052506	0.052937	0.053025	0.052854	0.053095	0.0532702			6.83121
6.8394	0.053133	0.052505	0.052937	0.053023	0.052849	0.053092	0.0532748			6.8394
6.84759	0.053131	0.052503	0.052936	0.053024	0.052847	0.053092	0.053272			6.84759
6.85578	0.053129	0.052502	0.052938	0.053023	0.052846	0.053091	0.0532666			6.85578
6.86397	0.053128	0.052504	0.052938	0.053023	0.052845	0.05309	0.0532663			6.86397
6.87216	0.05313	0.052502	0.052938	0.053024	0.052844	0.053086	0.0532701			6.87216
6.88035	0.053128	0.052502	0.052945	0.053024	0.052842	0.05309	0.0532744			6.88035
6.88854	0.053128	0.052505	0.052949	0.053024	0.052844	0.053097	0.0532747			6.88854
6.89673	0.053131	0.052502	0.052947	0.053027	0.052847	0.053095	0.0532755			6.89673
6.90492	0.053128	0.052501	0.052948	0.05303	0.052852	0.053095	0.0532782			6.90492
6.9131	0.053126	0.052502	0.052951	0.053028	0.052855	0.053094	0.0532811			6.9131
6.92129	0.053127	0.052505	0.052952	0.053025	0.052858	0.053093	0.0532827			6.92129
6.92948	0.053131	0.052507	0.052952	0.053026	0.052858	0.053096	0.0532813			6.92948
6.93767	0.053134	0.052507	0.052949	0.053025	0.052854	0.053097	0.0532782			6.93767
6.94587	0.053134	0.052507	0.052946	0.053026	0.052856	0.053094	0.0532757			6.94587
6.95405	0.053134	0.05251	0.052943	0.05303	0.052858	0.053093	0.0532751			6.95405
6.96224	0.053137	0.05251	0.052939	0.053034	0.052858	0.053096	0.0532774			6.96224
6.97043	0.053138	0.052509	0.052939	0.053034	0.05286	0.053095	0.0532833			6.97043
6.97862	0.053136	0.052509	0.052942	0.053033	0.052861	0.053091	0.0532839			6.97862
6.98681	0.053136	0.052509	0.052941	0.053033	0.052862	0.05309	0.0532821			6.98681
6.995	0.053136	0.05251	0.052942	0.053034	0.052865	0.053093	0.0532849			6.995
7.00319	0.053137	0.05251	0.052944	0.053037	0.052867	0.053095	0.0532899			7.00319
7.01138	0.053137	0.052506	0.052946	0.053036	0.052868	0.053091	0.0532906			7.01138
7.01957	0.053132	0.052502	0.052949	0.053033	0.052869	0.053087	0.0532882			7.01957
7.02776	0.053128	0.052502	0.052947	0.053036	0.052867	0.053087	0.0532857			7.02776
7.03595	0.053127	0.052504	0.052948	0.053036	0.052862	0.053092	0.0532823			7.03595
7.04414	0.05313	0.052506	0.052953	0.053032	0.052859	0.053099	0.0532816			7.04414
7.05233	0.053132	0.052506	0.052952	0.053026	0.052858	0.053102	0.0532837			7.05233
7.06052	0.053132	0.05251	0.052954	0.053025	0.052856	0.053103	0.0532883			7.06052
7.06871	0.053138	0.052514	0.052959	0.053026	0.052854	0.053105	0.0532914			7.06871
7.0769	0.053142	0.052513	0.052962	0.053023	0.052852	0.053103	0.0532938			7.0769
7.08509	0.053141	0.052508	0.052962	0.053022	0.05285	0.053101	0.0532993			7.08509
7.09328	0.053135	0.052506	0.052961	0.053029	0.052852	0.053101	0.0533048			7.09328
7.10147	0.053132	0.052506	0.052958	0.053034	0.052855	0.053102	0.0533065			7.10147
7.10966	0.053133	0.052506	0.052955	0.05303	0.052857	0.053099	0.0533081			7.10966
7.11785	0.053133	0.052507	0.05295	0.053029	0.052859	0.053099	0.0533099			7.11785
7.12604	0.053134	0.052506	0.052947	0.053031	0.052858	0.053099	0.0533103			7.12604
7.13423	0.053132	0.052505	0.052946	0.053032	0.052855	0.053099	0.0533131			7.13423
7.14242	0.053131	0.052505	0.052946	0.05303	0.052854	0.0531	0.0533123			7.14242
7.15061	0.053131	0.052505	0.052944	0.053026	0.052856	0.053097	0.0533093			7.15061
7.1588	0.053131	0.052507	0.052945	0.053027	0.052855	0.053094	0.0533104			7.1588
7.16699	0.053134	0.05251	0.052947	0.053026	0.052851	0.053092	0.0533092			7.16699
7.17518	0.053137	0.052511	0.052945	0.053027	0.05285	0.05309	0.0533116			7.17518
7.18337	0.053139	0.052514	0.05294	0.053027	0.05285	0.053096	0.053316			7.18337
7.19156	0.053142	0.052514	0.052936	0.053025	0.052852	0.053097	0.0533148			7.19156
7.19975	0.053143	0.052514	0.052937	0.053025	0.052854	0.053094	0.0533139			7.19975
7.20794	0.053142	0.052512	0.052939	0.053024	0.052856	0.053097	0.0533173			7.20794
7.21613	0.05314	0.052513	0.052939	0.053025	0.052857	0.053096	0.0533251			7.21613
7.22432	0.053141	0.052512	0.05294	0.053026	0.052857	0.053092	0.0533291			7.22432
7.23251	0.05314	0.052511	0.052939	0.053027	0.052855	0.053092	0.053331			7.23251
7.2407	0.053139	0.052509	0.052937	0.053026	0.052853	0.053093	0.0533331			7.2407
7.24889	0.053136	0.052504	0.052934	0.05303	0.052851	0.053093	0.0533349			7.24889
7.25708	0.05313	0.052503	0.052934	0.053036	0.052849	0.053097	0.053337			7.25708
7.26527	0.053129	0.052505	0.052932	0.053037	0.052852	0.053098	0.0533392			7.26527
7.27346	0.053131	0.052502	0.052931	0.053035	0.052857	0.053099	0.0533429			7.27346
7.28165	0.053128	0.052502	0.052933	0.053031	0.052859	0.0531	0.0533473			7.28165
7.28984	0.053128	0.052506	0.052932	0.053029	0.052858	0.053102	0.0533495			7.28984
7.29802	0.053133	0.052503	0.052931	0.053028	0.052859	0.053101	0.0533465			7.29802
7.30621	0.053129	0.052501	0.052934	0.053029	0.052858	0.053098	0.0533468			7.30621
7.3144	0.053126	0.052499	0.052936	0.05303	0.052861	0.053095	0.0533506			7.3144
7.32259	0.053124	0.052498	0.052934	0.053032	0.052863	0.053093	0.0533515			7.32259
7.33078	0.053123	0.052498	0.052936	0.053032	0.052859	0.053092	0.0533525			7.33078
7.33897	0.053123	0.052501	0.052939	0.053033	0.052858	0.053093	0.0533566			7.33897
7.34716	0.053126	0.052504	0.052938	0.053038	0.052858	0.053093	0.0533601			7.34716
7.35535	0.05313	0.052506	0.052934	0.053039	0.052856	0.053091	0.0533623			7.35535
7.36354	0.053132	0.052507	0.052934	0.053037	0.052851	0.053092	0.0533641			7.36354
7.37173	0.053134	0.052508	0.052935	0.053035	0.052848	0.053095	0.0533669			7.37173
7.37992	0.053135	0.052506	0.052936	0.053031	0.052849	0.053096	0.0533724			7.37992
7.38811	0.053133	0.052505	0.052932	0.053029	0.052848	0.053097	0.053378			7.38811
7.3963	0.053131	0.052506	0.052927	0.053026	0.052845	0.053095	0.0533837			7.3963
7.40449	0.053132	0.052506	0.052926	0.053024	0.052849	0.053093	0.0533871			7.40449
7.41268	0.053132	0.052505	0.052924	0.053025	0.052853	0.05309	0.0533886			7.41268
7.42087	0.053131	0.052508	0.052922	0.053027	0.052851	0.053088	0.0533909			7.42087
7.42906	0.053135	0.052507	0.052922	0.053028	0.05285	0.053087	0.0533915			7.42906
7.43725	0.053134	0.052507	0.052924	0.05303	0.052852	0.053085	0.0533898			7.43725
7.44544	0.053134	0.052507	0.052925	0.053032	0.052851	0.053089	0.0533868			7.44544
7.45363	0.053134	0.052502	0.052924	0.053029	0.05285	0.053096	0.0533863			7.45363
7.46182	0.053127	0.052502	0.05292	0.053028	0.052853	0.0531	0.0533911			7.46182
7.47001	0.053127	0.052499	0.052919	0.053028	0.052856	0.0531	0.0533977			7.47001
7.4782	0.053124	0.052496	0.052919	0.053026	0.052859	0.0531	0.0534051			7.4782
7.48639	0.05312	0.052497	0.052918	0.053024	0.052857	0.053101	0.053413			7.48639
7.49458	0.053121	0.052497	0.05292	0.053022	0.05285	0.053097	0.0534191			7.49458
7.50277	0.053121	0.052499	0.052924	0.053023	0.052847	0.053095	0.0534226			7.50277
7.51096	0.053124	0.052502	0.052927	0.053025	0.052847	0.053095	0.0534209			7.51096
7.51915	0.053128	0.052503	0.052929	0.053026	0.052848	0.053094	0.0534194			7.51915
7.52734	0.053129	0.052506	0.052927	0.053028	0.052851	0.053093	0.0534234			7.52734
7.53553	0.053133	0.052506	0.052922	0.053028	0.052855	0.053094	0.0534283			7.53553
7.54372	0.053132	0.052503	0.052922	0.053028	0.052856	0.053094	0.0534341			7.54372
7.55191	0.053129	0.052507	0.052922	0.053034	0.052853	0.053094	0.0534416			7.55191
7.5601	0.053134	0.052508	0.052921	0.053035	0.052855	0.053093	0.053449			7.5601
7.56829	0.053135	0.052509	0.052915	0.053027	0.052855	0.053093	0.0534557			7.56829
7.57648	0.053136	0.05251	0.052911	0.053027	0.052851	0.053094	0.0534599			7.57648
7.58467	0.053138	0.052509	0.05291	0.053029	0.052848	0.053099	0.0534621			7.58467
7.59286	0.053136	0.052509	0.052911	0.053028	0.052848	0.053097	0.0534664			7.59286
7.60105	0.053136	0.05251	0.052909	0.05303	0.052849	0.053094	0.053471			7.60105
7.60924	0.053137	0.052507	0.05291	0.053029	0.05285	0.053096	0.0534732			7.60924
7.61743	0.053134	0.052507	0.052914	0.053025	0.052852	0.053095	0.0534761			7.61743
7.62562	0.053134	0.05251	0.052919	0.053024	0.052851	0.053095	0.0534778			7.62562
7.63381	0.053137	0.052511	0.052921	0.053026	0.052848	0.053096	0.0534807			7.63381
7.642	0.053139	0.05251	0.052921	0.053029	0.052849	0.053091	0.0534882			7.642
7.65019	0.053138	0.052509	0.05292	0.053029	0.052851	0.053089	0.0534919			7.65019
7.65838	0.053136	0.052506	0.052914	0.053028	0.052848	0.053088	0.053493			7.65838
7.66657	0.053132	0.052502	0.05291	0.053027	0.052845	0.053084	0.0534951			7.66657
7.67476	0.053127	0.052499	0.05291	0.053032	0.052844	0.053083	0.0534979			7.67476
7.68295	0.053124	0.0525	0.052909	0.053035	0.052846	0.053087	0.0535045			7.68295
7.69114	0.053125	0.052505	0.052912	0.053033	0.052848	0.053092	0.0535134			7.69114
7.69932	0.053131	0.052506	0.052918	0.05303	0.052849	0.05309	0.0535187			7.69932
7.70751	0.053133	0.052508	0.052915	0.05303	0.052852	0.05309	0.0535209			7.70751
7.7157	0.053135	0.05251	0.052913	0.05303	0.052852	0.053095	0.0535256			7.7157
7.72389	0.053138	0.05251	0.052914	0.053032	0.052853	0.053095	0.0535329			7.72389
7.73208	0.053138	0.05251	0.052911	0.053034	0.052853	0.053092	0.0535375			7.73208
7.74027	0.053137	0.052509	0.052911	0.053035	0.052851	0.053096	0.0535399			7.74027
7.74846	0.053136	0.052506	0.052912	0.053036	0.052853	0.053103	0.0535441			7.74846
7.75665	0.053133	0.052506	0.052915	0.053039	0.052855	0.053102	0.0535485			7.75665
7.76484	0.053133	0.052507	0.052919	0.053036	0.052858	0.053093	0.0535534			7.76484
7.77303	0.053134	0.05251	0.052921	0.053029	0.052862	0.05309	0.0535565			7.77303
7.78122	0.053138	0.052511	0.052922	0.053032	0.052861	0.053094	0.0535616			7.78122
7.78941	0.053139	0.052507	0.052922	0.053037	0.052861	0.053094	0.0535705			7.78941
7.7976	0.053134	0.052507	0.05292	0.05304	0.052861	0.053096	0.0535782			7.7976
7.80579	0.053134	0.052508	0.052919	0.053038	0.052856	0.053102	0.0535843			7.80579
7.81398	0.053135	0.052508	0.05292	0.053035	0.052854	0.053102	0.0535868			7.81398
7.82217	0.053135	0.05251	0.05292	0.05304	0.052857	0.053099	0.0535881			7.82217
7.83036	0.053137	0.05251	0.052921	0.053044	0.052854	0.053099	0.053592			7.83036
7.83855	0.053137	0.052507	0.052921	0.053042	0.052852	0.053097	0.0535966			7.83855
7.84674	0.053134	0.052504	0.05292	0.053042	0.052851	0.053097	0.0535984			7.84674
7.85493	0.05313	0.052501	0.052921	0.053038	0.05285	0.053101	0.0535994			7.85493
7.86312	0.053126	0.052501	0.052919	0.053032	0.052851	0.053101	0.0536027			7.86312
7.87131	0.053126	0.052501	0.052915	0.053033	0.052851	0.053099	0.0536065			7.87131
7.8795	0.053126	0.052501	0.05291	0.053038	0.052848	0.053099	0.0536081			7.8795
7.88769	0.053126	0.052502	0.052907	0.053037	0.05285	0.053101	0.0536114			7.88769
7.89588	0.053128	0.052506	0.052909	0.053032	0.052856	0.053102	0.0536174			7.89588
7.90407	0.053132	0.052506	0.052911	0.053031	0.052857	0.0531	0.0536232			7.90407
7.91226	0.053133	0.052506	0.052911	0.053033	0.052858	0.053093	0.0536289			7.91226
7.92045	0.053133	0.05251	0.052913	0.053037	0.052858	0.05309	0.0536329			7.92045
7.92864	0.053137	0.052514	0.052916	0.05304	0.052857	0.05309	0.0536359			7.92864
7.93683	0.053142	0.052515	0.052916	0.053046	0.052857	0.053093	0.0536423			7.93683
7.94502	0.053144	0.052516	0.052914	0.053048	0.052857	0.053095	0.0536503			7.94502
7.95321	0.053145	0.052512	0.052913	0.053044	0.052856	0.053096	0.0536556			7.95321
7.9614	0.05314	0.052508	0.052915	0.053043	0.052855	0.053097	0.0536645			7.9614
7.96959	0.053135	0.052507	0.052914	0.053042	0.052854	0.053095	0.0536729			7.96959
7.97778	0.053134	0.052507	0.052908	0.053041	0.052855	0.053093	0.0536773			7.97778
7.98597	0.053134	0.05251	0.052903	0.053043	0.052861	0.053096	0.0536808			7.98597
7.99416	0.053137	0.05251	0.052903	0.053044	0.052864	0.053101	0.0536838			7.99416
8.00235	0.053137	0.05251	0.052905	0.053043	0.052865	0.053103	0.0536885			8.00235
8.01054	0.053137	0.05251	0.052906	0.053041	0.052866	0.053103	0.0536922			8.01054
8.01873	0.053138	0.052509	0.052907	0.053038	0.052867	0.053101	0.053695			8.01873
8.02692	0.053136	0.052508	0.052907	0.053032	0.052867	0.053097	0.0536984			8.02692
8.03511	0.053135	0.052509	0.052906	0.053032	0.052867	0.053094	0.0537013			8.03511
8.0433	0.053136	0.052509	0.052904	0.053039	0.052866	0.053094	0.0537044			8.0433
8.05149	0.053136	0.052508	0.052904	0.05304	0.052864	0.053094	0.0537072			8.05149
8.05968	0.053135	0.052506	0.052906	0.053039	0.052864	0.053094	0.0537089			8.05968
8.06786	0.053133	0.052505	0.052904	0.053036	0.052865	0.053097	0.0537144			8.06786
8.07606	0.053131	0.052504	0.052902	0.053032	0.052864	0.053101	0.0537216			8.07606
8.08424	0.05313	0.052506	0.052906	0.053033	0.052861	0.053101	0.0537255			8.08424
8.09243	0.053133	0.052507	0.052909	0.053038	0.052856	0.053096	0.0537282			8.09243
8.10062	0.053134	0.052506	0.052907	0.053038	0.052856	0.053095	0.0537314			8.10062
8.10881	0.053132	0.052508	0.052906	0.053034	0.052854	0.0531	0.0537364			8.10881
8.117	0.053135	0.05251	0.052908	0.053035	0.052852	0.0531	0.053742			8.117
8.12519	0.053138	0.05251	0.052912	0.053039	0.052854	0.053102	0.0537453			8.12519
8.13338	0.053138	0.052512	0.052916	0.05304	0.052857	0.053106	0.0537484			8.13338
8.14157	0.05314	0.052514	0.052919	0.053042	0.052857	0.053105	0.0537536			8.14157
8.14976	0.053143	0.052512	0.052919	0.053043	0.052861	0.053102	0.0537572			8.14976
8.15795	0.05314	0.052508	0.052918	0.053043	0.052861	0.053098	0.0537627			8.15795
8.16614	0.053135	0.052506	0.052914	0.053043	0.052856	0.053096	0.0537708			8.16614
8.17433	0.053133	0.05251	0.05291	0.05304	0.052852	0.053094	0.0537759			8.17433
8.18252	0.053138	0.052511	0.052907	0.053036	0.052852	0.053094	0.0537815			8.18252
8.19071	0.053139	0.052509	0.052909	0.053036	0.052855	0.053095	0.05379			8.19071
8.1989	0.053136	0.052509	0.052911	0.053039	0.052859	0.053097	0.053798			8.1989
8.20709	0.053136	0.052513	0.052912	0.053044	0.052864	0.053098	0.0537996			8.20709
8.21528	0.053141	0.052516	0.052913	0.053047	0.052865	0.053099	0.0537983			8.21528
8.22347	0.053145	0.052518	0.052912	0.053047	0.052861	0.053098	0.0538005			8.22347
8.23166	0.053147	0.052521	0.052915	0.053045	0.052859	0.053096	0.0538001			8.23166
8.23985	0.053151	0.052519	0.052918	0.053042	0.052854	0.053097	0.0538019			8.23985
8.24804	0.053149	0.052518	0.052918	0.05304	0.052851	0.053098	0.0538058			8.24804
8.25623	0.053147	0.052514	0.052914	0.05304	0.052847	0.053098	0.0538093			8.25623
8.26442	0.053142	0.052506	0.052908	0.05304	0.052841	0.053093	0.0538148			8.26442
8.27261	0.053132	0.052504	0.052912	0.053041	0.052844	0.053095	0.0538206			8.27261
8.2808	0.05313	0.052503	0.05292	0.053043	0.052847	0.053102	0.0538271			8.2808
8.28899	0.053129	0.052505	0.052921	0.053043	0.052845	0.053101	0.0538301			8.28899
8.29718	0.053131	0.052509	0.052921	0.053041	0.052845	0.053099	0.0538324			8.29718
8.30537	0.053136	0.05251	0.052924	0.053042	0.052848	0.053102	0.0538351			8.30537
8.31356	0.053137	0.052511	0.052924	0.053041	0.052849	0.053104	0.053842			8.31356
8.32175	0.053139	0.052511	0.052923	0.05304	0.052851	0.053104	0.0538484			8.32175
8.32994	0.053139	0.052511	0.052923	0.053042	0.052856	0.053104	0.0538471			8.32994
8.33813	0.053139	0.052513	0.052922	0.053042	0.052858	0.053102	0.0538487			8.33813
8.34632	0.053141	0.05251	0.052923	0.05304	0.05286	0.053103	0.053855			8.34632
8.35451	0.053138	0.052506	0.052927	0.05304	0.052866	0.053102	0.0538564			8.35451
8.3627	0.053133	0.052502	0.05293	0.053037	0.052866	0.0531	0.0538566			8.3627
8.37089	0.053127	0.0525	0.05293	0.053035	0.052861	0.053102	0.0538618			8.37089
8.37908	0.053125	0.052504	0.052928	0.053035	0.052852	0.053101	0.0538673			8.37908
8.38727	0.05313	0.052508	0.052928	0.053035	0.052852	0.053102	0.053867			8.38727
8.39546	0.053135	0.052513	0.052928	0.053032	0.052859	0.053106	0.0538644			8.39546
8.40365	0.053141	0.052515	0.052928	0.053033	0.052862	0.053103	0.0538649			8.40365
8.41184	0.053144	0.052517	0.05293	0.053036	0.052864	0.0531	0.0538666			8.41184
8.42003	0.053146	0.052519	0.052933	0.053039	0.052866	0.053102	0.0538684			8.42003
8.42822	0.053149	0.052518	0.052939	0.053038	0.052866	0.0531	0.0538702			8.42822
8.43641	0.053148	0.052516	0.052946	0.053036	0.052867	0.053105	0.0538718			8.43641
8.44459	0.053145	0.052515	0.052951	0.053035	0.052872	0.053112	0.0538754			8.44459
8.45279	0.053144	0.052516	0.05295	0.053035	0.052878	0.05311	0.0538798			8.45279
8.46097	0.053145	0.052514	0.052952	0.053037	0.052879	0.053107	0.0538837			8.46097
8.46917	0.053143	0.052515	0.052956	0.053039	0.052871	0.053107	0.0538872			8.46917
8.47735	0.053144	0.052518	0.052953	0.053038	0.052863	0.053104	0.0538908			8.47735
8.48554	0.053147	0.052518	0.052954	0.05304	0.05286	0.053102	0.0538918			8.48554
8.49373	0.053147	0.052517	0.05296	0.053044	0.05286	0.053102	0.0538904			8.49373
8.50192	0.053146	0.052517	0.052964	0.053046	0.05286	0.053099	0.0538912			8.50192
8.51011	0.053146	0.052516	0.052968	0.053047	0.052858	0.053098	0.0538973			8.51011
8.5183	0.053145	0.052516	0.052971	0.053045	0.05286	0.053104	0.0539003			8.5183
8.52649	0.053145	0.052513	0.052974	0.053048	0.052864	0.053103	0.0539011			8.52649
8.53468	0.053141	0.052513	0.052979	0.053046	0.052869	0.053102	0.0539068			8.53468
8.54287	0.053141	0.052514	0.052986	0.053039	0.052869	0.053105	0.0539083			8.54287
8.55106	0.053143	0.052514	0.052987	0.053036	0.052867	0.053105	0.053908			8.55106
8.55925	0.053143	0.052514	0.05299	0.053037	0.052865	0.053104	0.053911			8.55925
8.56744	0.053143	0.052515	0.052995	0.053041	0.052862	0.053105	0.0539126			8.56744
8.57563	0.053144	0.052517	0.052996	0.053039	0.052859	0.053107	0.0539149			8.57563
8.58382	0.053146	0.052515	0.052998	0.053035	0.052859	0.053106	0.0539235			8.58382
8.59201	0.053144	0.052511	0.053	0.053038	0.052862	0.053104	0.0539293			8.59201
8.6002	0.053139	0.052509	0.053004	0.053034	0.052864	0.053104	0.0539301			8.6002
8.60839	0.053136	0.05251	0.053006	0.053028	0.052865	0.053103	0.0539316			8.60839
8.61658	0.053137	0.052512	0.053007	0.053028	0.052866	0.053102	0.0539333			8.61658
8.62477	0.05314	0.052512	0.053014	0.05303	0.052868	0.053106	0.0539352			8.62477
8.63296	0.05314	0.052509	0.053021	0.053032	0.052866	0.053109	0.0539361			8.63296
8.64115	0.053136	0.052505	0.053025	0.053035	0.052863	0.05311	0.0539392			8.64115
8.64934	0.053131	0.052506	0.053026	0.053039	0.052862	0.053107	0.0539418			8.64934
8.65753	0.053132	0.052509	0.053028	0.053038	0.052866	0.053101	0.0539414			8.65753
8.66572	0.053136	0.05251	0.053028	0.053037	0.052869	0.053099	0.0539434			8.66572
8.67391	0.053138	0.052513	0.053026	0.053043	0.052866	0.053102	0.0539478			8.67391
8.6821	0.053141	0.05251	0.05303	0.053047	0.052866	0.0531	0.0539495			8.6821
8.69029	0.053138	0.052509	0.053032	0.053047	0.052868	0.053097	0.0539528			8.69029
8.69848	0.053136	0.05251	0.053036	0.05305	0.05287	0.0531	0.0539587			8.69848
8.70667	0.053138	0.052514	0.05304	0.053052	0.052874	0.053101	0.0539619			8.70667
8.71486	0.053143	0.052516	0.053044	0.05305	0.052876	0.0531	0.0539616			8.71486
8.72305	0.053145	0.052513	0.053047	0.053048	0.05288	0.053103	0.0539612			8.72305
8.73124	0.053141	0.052511	0.053049	0.053044	0.052883	0.053106	0.0539616			8.73124
8.73943	0.053139	0.052511	0.053052	0.053043	0.052881	0.05311	0.0539664			8.73943
8.74762	0.053139	0.052512	0.053061	0.053042	0.05288	0.05311	0.0539744			8.74762
8.75581	0.05314	0.052514	0.05307	0.053044	0.05288	0.053106	0.0539731			8.75581
8.764	0.053143	0.052514	0.053077	0.053043	0.05288	0.053105	0.0539676			8.764
8.77219	0.053143	0.052512	0.05308	0.053042	0.052878	0.053106	0.0539666			8.77219
8.78038	0.05314	0.05251	0.05308	0.053045	0.052872	0.05311	0.0539657			8.78038
8.78857	0.053138	0.052511	0.053083	0.053044	0.052869	0.053111	0.0539668			8.78857
8.79676	0.053139	0.05251	0.053087	0.053042	0.052869	0.053108	0.0539723			8.79676
8.80495	0.053138	0.052512	0.053091	0.053043	0.052875	0.053106	0.0539824			8.80495
8.81314	0.05314	0.052512	0.053095	0.053045	0.052879	0.053108	0.0539923			8.81314
8.82132	0.05314	0.052512	0.053101	0.053039	0.052878	0.053114	0.053996			8.82132
8.82952	0.05314	0.052513	0.053108	0.053033	0.052876	0.053113	0.0539959			8.82952
8.8377	0.053141	0.052512	0.053112	0.053033	0.052872	0.053112	0.053995			8.8377
8.8459	0.05314	0.052512	0.053115	0.053033	0.052869	0.053118	0.0539967			8.8459
8.85408	0.05314	0.052511	0.053121	0.053037	0.052869	0.05312	0.0539974			8.85408
8.86227	0.053139	0.052512	0.053124	0.053041	0.052868	0.053119	0.0539971			8.86227
8.87046	0.05314	0.052511	0.053126	0.053042	0.052867	0.05312	0.0539995			8.87046
8.87865	0.053139	0.052511	0.053133	0.05304	0.052868	0.053125	0.0540042			8.87865
8.88684	0.053139	0.052513	0.053138	0.053043	0.052866	0.053125	0.054007			8.88684
8.89503	0.053141	0.05251	0.053143	0.053047	0.052865	0.053126	0.0540095			8.89503
8.90322	0.053138	0.052513	0.053148	0.053046	0.052866	0.053129	0.0540139			8.90322
8.91141	0.053141	0.052516	0.053153	0.053047	0.052868	0.053122	0.0540154			8.91141
8.9196	0.053145	0.052515	0.053157	0.05305	0.052868	0.053122	0.0540153			8.9196
8.92779	0.053144	0.052517	0.053159	0.053051	0.052869	0.053127	0.0540181			8.92779
8.93598	0.053146	0.052518	0.053161	0.05305	0.05287	0.053128	0.0540186			8.93598
8.94417	0.053147	0.052518	0.053164	0.053047	0.052872	0.05313	0.0540158			8.94417
8.95236	0.053147	0.052514	0.053166	0.053047	0.052875	0.053131	0.0540186			8.95236
8.96055	0.053143	0.05251	0.053168	0.053045	0.052877	0.053128	0.0540248			8.96055
8.96874	0.053137	0.05251	0.053172	0.053045	0.052881	0.053127	0.0540281			8.96874
8.97693	0.053137	0.052512	0.053176	0.053043	0.052881	0.053131	0.0540303			8.97693
8.98512	0.05314	0.052514	0.05318	0.053041	0.052876	0.053134	0.0540343			8.98512
8.99331	0.053143	0.052514	0.053182	0.053047	0.052873	0.053135	0.0540375			8.99331
9.0015	0.053142	0.052514	0.053183	0.05305	0.052874	0.053132	0.0540392			9.0015
9.00969	0.053142	0.052513	0.053188	0.053047	0.052875	0.053131	0.0540418			9.00969
9.01788	0.053141	0.052516	0.053189	0.053046	0.052876	0.053134	0.0540443			9.01788
9.02607	0.053145	0.052518	0.053189	0.053047	0.052871	0.053135	0.0540475			9.02607
9.03426	0.053148	0.052517	0.053196	0.053042	0.052865	0.053135	0.0540516			9.03426
9.04245	0.053146	0.052518	0.053204	0.053039	0.052864	0.053137	0.0540528			9.04245
9.05064	0.053148	0.052518	0.053212	0.05304	0.052864	0.053135	0.0540504			9.05064
9.05883	0.053148	0.052516	0.053216	0.05304	0.052865	0.053131	0.0540507			9.05883
9.06702	0.053145	0.052517	0.053216	0.053043	0.052864	0.05313	0.0540519			9.06702
9.07521	0.053146	0.052518	0.053218	0.053047	0.052867	0.053133	0.0540514			9.07521
9.0834	0.053147	0.052517	0.053223	0.053046	0.052875	0.053132	0.0540539			9.0834
9.09159	0.053146	0.052518	0.053232	0.053044	0.052879	0.053128	0.0540583			9.09159
9.09978	0.053147	0.052518	0.053237	0.05305	0.052877	0.053129	0.0540622			9.09978
9.10797	0.053147	0.052517	0.053239	0.053056	0.052876	0.05313	0.0540652			9.10797
9.11616	0.053146	0.052516	0.053243	0.053052	0.052876	0.053134	0.0540678			9.11616
9.12435	0.053145	0.052517	0.053245	0.053046	0.052874	0.053138	0.0540676			9.12435
9.13254	0.053146	0.052519	0.053248	0.053042	0.052875	0.053137	0.0540691			9.13254
9.14073	0.053149	0.052519	0.053252	0.053041	0.052878	0.053135	0.0540749			9.14073
9.14892	0.053149	0.052516	0.053255	0.053042	0.05288	0.053132	0.0540776			9.14892
9.15711	0.053145	0.052518	0.053258	0.053041	0.052881	0.053129	0.0540805			9.15711
9.1653	0.053147	0.052517	0.053261	0.053042	0.05288	0.053129	0.0540843			9.1653
9.17349	0.053146	0.052518	0.053261	0.053042	0.052876	0.053131	0.0540868			9.17349
9.18168	0.053147	0.052521	0.05326	0.053048	0.052871	0.053131	0.0540861			9.18168
9.18987	0.053151	0.052523	0.053261	0.053052	0.052864	0.053132	0.0540842			9.18987
9.19806	0.053154	0.052527	0.053263	0.053049	0.052861	0.053129	0.0540849			9.19806
9.20624	0.053159	0.052528	0.053266	0.053045	0.052862	0.05313	0.0540853			9.20624
9.21443	0.05316	0.052523	0.053269	0.053049	0.052864	0.053135	0.0540855			9.21443
9.22263	0.053154	0.05252	0.053274	0.053051	0.052869	0.053132	0.0540848			9.22263
9.23081	0.05315	0.052518	0.053277	0.053048	0.052874	0.05313	0.0540842			9.23081
9.239	0.053148	0.052519	0.053278	0.053048	0.052878	0.053134	0.0540859			9.239
9.24719	0.053149	0.052522	0.053275	0.053048	0.052875	0.053133	0.0540856			9.24719
9.25538	0.053152	0.052522	0.053274	0.053047	0.052869	0.053133	0.0540858			9.25538
9.26357	0.053153	0.052523	0.053278	0.05305	0.052865	0.053135	0.0540919			9.26357
9.27176	0.053154	0.052522	0.053279	0.053052	0.052864	0.053134	0.0540964			9.27176
9.27995	0.053153	0.052523	0.053283	0.053049	0.052869	0.053135	0.0540965			9.27995
9.28814	0.053154	0.05253	0.05329	0.053046	0.052872	0.053133	0.0540949			9.28814
9.29633	0.053162	0.052534	0.053293	0.053049	0.052874	0.053132	0.0540946			9.29633
9.30452	0.053167	0.052534	0.053297	0.053049	0.052875	0.053137	0.0540942			9.30452
9.31271	0.053168	0.052541	0.053302	0.053046	0.052876	0.053138	0.0540935			9.31271
9.3209	0.053176	0.052543	0.053305	0.05305	0.052879	0.053141	0.0540942			9.3209
9.32909	0.053179	0.052538	0.053303	0.053054	0.052876	0.053142	0.0540933			9.32909
9.33728	0.053173	0.052534	0.0533	0.053055	0.052872	0.053141	0.0540938			9.33728
9.34547	0.053167	0.05253	0.053301	0.053055	0.052871	0.053144	0.0540965			9.34547
9.35366	0.053163	0.05253	0.053308	0.053054	0.05287	0.053142	0.054097			9.35366
9.36185	0.053162	0.052532	0.053317	0.053054	0.05287	0.053137	0.0540959			9.36185
9.37004	0.053165	0.052535	0.053323	0.053056	0.052868	0.053134	0.0540964			9.37004
9.37823	0.053169	0.052536	0.053326	0.053058	0.052867	0.053136	0.0540953			9.37823
9.38642	0.05317	0.052538	0.053327	0.053057	0.052869	0.053137	0.0540939			9.38642
9.39461	0.053173	0.052543	0.053329	0.053052	0.052868	0.053134	0.0540955			9.39461
9.4028	0.053179	0.052544	0.053329	0.053047	0.052868	0.053133	0.0540974			9.4028
9.41099	0.05318	0.052542	0.053327	0.053049	0.052872	0.053133	0.0540991			9.41099
9.41918	0.053178	0.052544	0.053328	0.05305	0.052872	0.053137	0.0540957			9.41918
9.42737	0.05318	0.052544	0.053328	0.053049	0.052872	0.053142	0.0540908			9.42737
9.43556	0.05318	0.052545	0.053328	0.053047	0.05287	0.053144	0.0540902			9.43556
9.44375	0.053181	0.052546	0.053329	0.05305	0.052865	0.053147	0.0540891			9.44375
9.45194	0.053183	0.052547	0.053331	0.053055	0.05286	0.05315	0.0540872			9.45194
9.46013	0.053184	0.052544	0.053332	0.053053	0.05286	0.053146	0.0540893			9.46013
9.46832	0.05318	0.052542	0.053333	0.053052	0.052862	0.053142	0.0540928			9.46832
9.47651	0.053178	0.052544	0.053337	0.053052	0.052866	0.053142	0.0540921			9.47651
9.4847	0.05318	0.052541	0.053341	0.053052	0.052869	0.053142	0.0540912			9.4847
9.49289	0.053176	0.05254	0.053344	0.053052	0.052869	0.053144	0.054092			9.49289
9.50108	0.053175	0.052542	0.053348	0.053055	0.05287	0.053149	0.0540896			9.50108
9.50927	0.053178	0.052544	0.053351	0.053058	0.052874	0.053153	0.0540881			9.50927
9.51746	0.05318	0.052546	0.053353	0.053056	0.052872	0.05315	0.0540869			9.51746
9.52565	0.053182	0.052545	0.053356	0.053053	0.052869	0.053147	0.0540799			9.52565
9.53384	0.053181	0.052544	0.05336	0.053054	0.052869	0.053146	0.054075			9.53384
9.54203	0.05318	0.052543	0.053365	0.053058	0.052869	0.053148	0.0540728			9.54203
9.55022	0.053179	0.052542	0.053366	0.053061	0.052867	0.053153	0.0540697			9.55022
9.55841	0.053178	0.052542	0.053368	0.053056	0.052869	0.053157	0.0540694			9.55841
9.5666	0.053177	0.052545	0.053372	0.053055	0.052868	0.053161	0.0540713			9.5666
9.57479	0.053181	0.052549	0.053375	0.053055	0.052866	0.053163	0.0540679			9.57479
9.58297	0.053186	0.052553	0.053381	0.053056	0.052864	0.05316	0.0540628			9.58297
9.59117	0.053191	0.052551	0.053385	0.053061	0.052863	0.053158	0.0540612			9.59117
9.59935	0.053189	0.052547	0.053389	0.05306	0.052864	0.053158	0.0540574			9.59935
9.60755	0.053184	0.05255	0.053389	0.053057	0.052865	0.053154	0.0540524			9.60755
9.61573	0.053187	0.05255	0.053389	0.053057	0.052864	0.053156	0.0540464			9.61573
9.62392	0.053187	0.052547	0.053388	0.053057	0.052861	0.053159	0.0540395			9.62392
9.63211	0.053184	0.052548	0.053387	0.053062	0.052862	0.05316	0.0540367			9.63211
9.6403	0.053185	0.052546	0.053392	0.053065	0.052863	0.053158	0.0540354			9.6403
9.64849	0.053182	0.052546	0.053397	0.05306	0.052864	0.053158	0.0540307			9.64849
9.65668	0.053182	0.052547	0.053399	0.053059	0.052866	0.053164	0.0540255			9.65668
9.66487	0.053184	0.052546	0.053403	0.053062	0.052866	0.053171	0.0540212			9.66487
9.67306	0.053183	0.05255	0.05341	0.053062	0.052864	0.053174	0.0540171			9.67306
9.68125	0.053187	0.052553	0.053416	0.053063	0.052863	0.053174	0.0540102			9.68125
9.68944	0.053191	0.052553	0.053417	0.053069	0.052862	0.053174	0.0540015			9.68944
9.69763	0.053191	0.052554	0.053415	0.053071	0.052863	0.053175	0.0539976			9.69763
9.70582	0.053192	0.052554	0.053418	0.053066	0.052866	0.053174	0.0539925			9.70582
9.71401	0.053193	0.052556	0.05342	0.053065	0.052865	0.053177	0.0539848			9.71401
9.7222	0.053195	0.052555	0.053419	0.053067	0.05286	0.053179	0.0539833			9.7222
9.73039	0.053194	0.052556	0.053424	0.053069	0.052857	0.053179	0.053982			9.73039
9.73858	0.053195	0.052559	0.053432	0.053071	0.052856	0.053179	0.0539785			9.73858
9.74677	0.053199	0.052557	0.053439	0.053073	0.052855	0.053176	0.0539766			9.74677
9.75496	0.053196	0.052557	0.05344	0.053072	0.052856	0.053173	0.0539711			9.75496
9.76315	0.053196	0.052557	0.053441	0.053069	0.05286	0.053174	0.0539671			9.76315
9.77134	0.053196	0.052555	0.053444	0.05307	0.052864	0.053174	0.0539647			9.77134
9.77953	0.053194	0.052554	0.053448	0.053072	0.052865	0.053173	0.0539606			9.77953
9.78772	0.053192	0.052555	0.053451	0.05307	0.052862	0.053178	0.0539559			9.78772
9.79591	0.053194	0.052558	0.053455	0.053071	0.052863	0.053177	0.0539496			9.79591
9.8041	0.053197	0.052558	0.053459	0.053074	0.052863	0.053171	0.0539466			9.8041
9.81229	0.053198	0.052556	0.053459	0.053072	0.052862	0.05317	0.0539423			9.81229
9.82048	0.053195	0.052553	0.053459	0.053073	0.052859	0.053173	0.053934			9.82048
9.82867	0.053191	0.05255	0.053462	0.05308	0.052855	0.053174	0.0539246			9.82867
9.83686	0.053188	0.052551	0.053467	0.053079	0.052855	0.05317	0.0539158			9.83686
9.84505	0.053189	0.052554	0.053472	0.053072	0.052857	0.053163	0.0539055			9.84505
9.85324	0.053192	0.052557	0.053476	0.053069	0.052858	0.053163	0.0538962			9.85324
9.86143	0.053196	0.052561	0.053484	0.05307	0.052862	0.053165	0.0538898			9.86143
9.86962	0.053201	0.052562	0.053492	0.053072	0.052867	0.053164	0.0538812			9.86962
9.87781	0.053202	0.052561	0.053498	0.053077	0.052872	0.053168	0.0538742			9.87781
9.886	0.053201	0.052562	0.053501	0.05308	0.052877	0.053167	0.0538714			9.886
9.89419	0.053203	0.052563	0.053499	0.053079	0.052878	0.053163	0.0538664			9.89419
9.90238	0.053204	0.052564	0.053496	0.053076	0.052872	0.053159	0.0538605			9.90238
9.91057	0.053205	0.052562	0.053495	0.053074	0.052869	0.053161	0.0538545			9.91057
9.91876	0.053202	0.052562	0.053496	0.053077	0.052867	0.053169	0.0538462			9.91876
9.92695	0.053202	0.052564	0.053499	0.053079	0.052867	0.053168	0.0538363			9.92695
9.93514	0.053205	0.052561	0.053501	0.053078	0.052868	0.053165	0.0538259			9.93514
9.94333	0.053201	0.052559	0.053504	0.053079	0.052869	0.053166	0.0538185			9.94333
9.95152	0.053199	0.052561	0.053509	0.05308	0.052868	0.053168	0.0538107			9.95152
9.9597	0.053201	0.052562	0.05351	0.05308	0.052864	0.053171	0.0538025			9.9597
9.9679	0.053203	0.052563	0.053509	0.05308	0.052868	0.05317	0.0537961			9.9679
9.97608	0.053204	0.052566	0.053512	0.053078	0.052871	0.053167	0.0537922			9.97608
9.98428	0.053207	0.052567	0.053516	0.05308	0.052868	0.053166	0.0537882			9.98428
9.99246	0.053209	0.052572	0.053519	0.053083	0.052865	0.053165	0.0537824			9.99246
10.0007	0.053215	0.052573	0.053518	0.05308	0.052864	0.053166	0.0537758			10.0007
10.0088	0.053216	0.052567	0.053513	0.053075	0.052863	0.053168	0.0537701			10.0088
10.017	0.053209	0.052566	0.053511	0.053076	0.052867	0.05317	0.0537644			10.017
10.0252	0.053208	0.05257	0.053512	0.053082	0.052868	0.053168	0.0537551			10.0252
10.0334	0.053213	0.052569	0.053513	0.053084	0.052867	0.053171	0.0537459			10.0334
10.0416	0.053211	0.052566	0.053517	0.053085	0.052869	0.053177	0.0537373			10.0416
10.0498	0.053207	0.052566	0.053521	0.053086	0.05287	0.053176	0.0537288			10.0498
10.058	0.053207	0.052568	0.053522	0.053086	0.05287	0.05317	0.0537224			10.058
10.0662	0.05321	0.05257	0.053524	0.053091	0.05287	0.05317	0.0537126			10.0662
10.0744	0.053212	0.052568	0.053524	0.053097	0.05287	0.053171	0.0537036			10.0744
10.0825	0.05321	0.052568	0.053521	0.053096	0.052868	0.053169	0.0537006			10.0825
10.0907	0.05321	0.052572	0.053517	0.053094	0.052867	0.053171	0.0536941			10.0907
10.0989	0.053215	0.052574	0.053512	0.053094	0.052868	0.053174	0.0536824			10.0989
10.1071	0.053217	0.05257	0.053509	0.053098	0.052865	0.053175	0.053677			10.1071
10.1153	0.053213	0.052569	0.053508	0.0531	0.052866	0.053177	0.0536705			10.1153
10.1235	0.053211	0.05257	0.053511	0.053099	0.05287	0.053176	0.0536586			10.1235
10.1317	0.053213	0.052566	0.053513	0.0531	0.052871	0.053176	0.0536491			10.1317
10.1399	0.053208	0.052566	0.05351	0.053102	0.052873	0.053177	0.0536361			10.1399
10.1481	0.053207	0.052569	0.053511	0.053105	0.052874	0.053174	0.0536253			10.1481
10.1563	0.053211	0.052565	0.053511	0.053106	0.052878	0.053171	0.0536241			10.1563
10.1645	0.053206	0.052563	0.05351	0.053105	0.052886	0.053171	0.0536225			10.1645
10.1726	0.053204	0.052565	0.05351	0.053108	0.052888	0.053168	0.0536216			10.1726
10.1808	0.053206	0.052564	0.053508	0.05311	0.052886	0.053163	0.0536215			10.1808
10.189	0.053205	0.052566	0.053506	0.053112	0.052885	0.053163	0.0536196			10.189
10.1972	0.053207	0.052566	0.053505	0.053114	0.052885	0.053165	0.0536156			10.1972
10.2054	0.053207	0.052564	0.053504	0.053112	0.052883	0.053167	0.0536082			10.2054
10.2136	0.053205	0.052563	0.053501	0.053112	0.052881	0.05317	0.0536026			10.2136
10.2218	0.053204	0.052563	0.053497	0.053115	0.052881	0.053175	0.0535956			10.2218
10.23	0.053204	0.052563	0.053493	0.053116	0.052877	0.053177	0.0535877			10.23
10.2382	0.053204	0.052565	0.053488	0.053116	0.052875	0.053171	0.0535821			10.2382
10.2463	0.053206	0.052566	0.053483	0.05312	0.052879	0.053171	0.0535767			10.2463
10.2545	0.053207	0.052563	0.05348	0.05312	0.052881	0.053179	0.0535708			10.2545
10.2627	0.053204	0.052562	0.053478	0.053115	0.052883	0.053181	0.0535623			10.2627
10.2709	0.053202	0.052565	0.053476	0.053112	0.052887	0.053178	0.0535566			10.2709
10.2791	0.053206	0.052567	0.053474	0.053114	0.052891	0.053178	0.053554			10.2791
10.2873	0.053209	0.052567	0.053469	0.053116	0.052893	0.053183	0.0535516			10.2873
10.2955	0.053209	0.052569	0.053463	0.053113	0.052899	0.053189	0.0535507			10.2955
10.3037	0.053211	0.052569	0.05346	0.053112	0.052903	0.053191	0.0535505			10.3037
10.3119	0.053211	0.05257	0.05346	0.053115	0.052903	0.05319	0.0535484			10.3119
10.3201	0.053212	0.052568	0.053458	0.053119	0.052905	0.053189	0.0535447			10.3201
10.3283	0.05321	0.052568	0.053453	0.053121	0.052902	0.053191	0.0535408			10.3283
10.3364	0.05321	0.052568	0.053449	0.05312	0.052894	0.053196	0.0535352			10.3364
10.3446	0.05321	0.052567	0.053444	0.053119	0.052891	0.053203	0.05353			10.3446
10.3528	0.053209	0.052568	0.053438	0.053116	0.052895	0.05321	0.0535285			10.3528
10.361	0.05321	0.052565	0.053434	0.053114	0.052896	0.053211	0.0535283			10.361
10.3692	0.053206	0.052566	0.053426	0.053117	0.052897	0.053209	0.0535258			10.3692
10.3774	0.053208	0.05257	0.053416	0.053116	0.0529	0.053212	0.0535234			10.3774
10.3856	0.053212	0.052571	0.053408	0.053112	0.052905	0.053217	0.053521			10.3856
10.3938	0.053214	0.052573	0.053404	0.053113	0.05291	0.053222	0.0535185			10.3938
10.4019	0.053216	0.052574	0.053401	0.053114	0.052909	0.053229	0.0535154			10.4019
10.4101	0.053217	0.05257	0.053398	0.053116	0.052907	0.053237	0.0535128			10.4101
10.4183	0.053213	0.052568	0.053393	0.053119	0.052909	0.053238	0.0535094			10.4183
10.4265	0.05321	0.052572	0.053388	0.053121	0.052908	0.053238	0.0535026			10.4265
10.4347	0.053215	0.052574	0.053386	0.053123	0.052903	0.053243	0.0535023			10.4347
10.4429	0.053217	0.052571	0.05338	0.053119	0.052903	0.05325	0.0535043			10.4429
10.4511	0.053214	0.05257	0.053374	0.053113	0.052906	0.053259	0.0535041			10.4511
10.4593	0.053213	0.05257	0.053367	0.053113	0.052906	0.053269	0.0535057			10.4593
10.4675	0.053212	0.052568	0.053361	0.05311	0.052904	0.053278	0.0535089			10.4675
10.4757	0.05321	0.052566	0.053356	0.053107	0.052903	0.053285	0.0535145			10.4757
10.4839	0.053208	0.052568	0.053348	0.053107	0.052902	0.053289	0.0535192			10.4839
10.492	0.05321	0.05257	0.053343	0.053107	0.052904	0.053294	0.0535243			10.492
10.5002	0.053213	0.052572	0.053341	0.053111	0.052904	0.053298	0.0535303			10.5002
10.5084	0.053215	0.052574	0.053342	0.053112	0.052902	0.053304	0.0535343			10.5084
10.5166	0.053217	0.052574	0.053339	0.05311	0.0529	0.053309	0.0535346			10.5166
10.5248	0.053218	0.052574	0.053329	0.053111	0.0529	0.053311	0.0535353			10.5248
10.533	0.053217	0.052574	0.053321	0.053116	0.052899	0.053319	0.0535418			10.533
10.5412	0.053217	0.052577	0.053314	0.053121	0.052899	0.053324	0.0535471			10.5412
10.5494	0.053221	0.052577	0.053303	0.053123	0.052901	0.05333	0.0535505			10.5494
10.5576	0.053221	0.052574	0.053293	0.053123	0.052905	0.05334	0.0535593			10.5576
10.5657	0.053217	0.052573	0.053289	0.053122	0.052909	0.053349	0.0535686			10.5657
10.5739	0.053216	0.052572	0.053285	0.053123	0.05291	0.053354	0.0535769			10.5739
10.5821	0.053215	0.052568	0.053282	0.053126	0.052908	0.05336	0.0535882			10.5821
10.5903	0.05321	0.052567	0.053281	0.05313	0.052906	0.053369	0.053597			10.5903
10.5985	0.053209	0.05257	0.053281	0.053128	0.052907	0.05338	0.0536012			10.5985
10.6067	0.053212	0.052574	0.05328	0.053124	0.052909	0.053388	0.0536028			10.6067
10.6149	0.053217	0.052576	0.053279	0.053126	0.052907	0.05339	0.0536047			10.6149
10.6231	0.05322	0.052578	0.053277	0.053124	0.052905	0.053397	0.0536119			10.6231
10.6313	0.053222	0.052579	0.053272	0.053123	0.052907	0.053406	0.0536244			10.6313
10.6395	0.053224	0.052577	0.053265	0.053126	0.052911	0.053412	0.0536375			10.6395
10.6477	0.053221	0.052576	0.053259	0.053128	0.052914	0.053421	0.0536505			10.6477
10.6558	0.05322	0.052576	0.053259	0.053128	0.052912	0.053431	0.0536612			10.6558
10.664	0.05322	0.052574	0.053264	0.053127	0.052907	0.053437	0.0536695			10.664
10.6722	0.053218	0.052575	0.05326	0.053129	0.052904	0.053444	0.0536806			10.6722
10.6804	0.053219	0.052574	0.053257	0.053129	0.052905	0.053457	0.0536928			10.6804
10.6886	0.053217	0.052577	0.053258	0.053134	0.052911	0.053469	0.0537064			10.6886
10.6968	0.053221	0.05258	0.053255	0.053137	0.052914	0.053476	0.0537231			10.6968
10.705	0.053225	0.052581	0.053249	0.053134	0.052912	0.053481	0.0537381			10.705
10.7132	0.053226	0.052584	0.053246	0.053138	0.052914	0.053492	0.053751			10.7132
10.7214	0.05323	0.052584	0.053246	0.053138	0.052921	0.053502	0.053762			10.7214
10.7295	0.05323	0.052581	0.053251	0.053135	0.052922	0.053508	0.0537709			10.7295
10.7377	0.053226	0.052579	0.053251	0.053135	0.052918	0.053521	0.0537788			10.7377
10.7459	0.053224	0.052578	0.053249	0.053133	0.052913	0.053532	0.0537898			10.7459
10.7541	0.053223	0.052579	0.053252	0.053136	0.052912	0.053541	0.0537978			10.7541
10.7623	0.053224	0.052581	0.053254	0.053143	0.052917	0.053548	0.0538027			10.7623
10.7705	0.053226	0.052583	0.053251	0.053145	0.05292	0.053559	0.0538087			10.7705
10.7787	0.053229	0.052586	0.053251	0.053148	0.05292	0.05358	0.0538126			10.7787
10.7869	0.053232	0.05259	0.05325	0.053154	0.052919	0.053593	0.0538168			10.7869
10.7951	0.053237	0.05259	0.053252	0.053157	0.052918	0.053602	0.0538234			10.7951
10.8033	0.053237	0.052589	0.053258	0.053163	0.052919	0.053616	0.0538284			10.8033
10.8114	0.053236	0.052594	0.053262	0.053171	0.052921	0.053627	0.0538291			10.8114
10.8196	0.053242	0.052598	0.053266	0.053174	0.052926	0.053633	0.0538306			10.8196
10.8278	0.053248	0.052603	0.05327	0.053177	0.052929	0.053642	0.0538335			10.8278
10.836	0.053254	0.052606	0.053274	0.053185	0.05293	0.053652	0.0538333			10.836
10.8442	0.053257	0.052606	0.05328	0.053195	0.052928	0.053662	0.0538314			10.8442
10.8524	0.053258	0.05261	0.053287	0.053203	0.052924	0.053673	0.0538292			10.8524
10.8606	0.053262	0.052618	0.053293	0.053212	0.052923	0.053678	0.0538293			10.8606
10.8688	0.053272	0.05262	0.053299	0.053221	0.052924	0.053684	0.0538315			10.8688
10.877	0.053275	0.052621	0.053307	0.053227	0.052926	0.05369	0.05383			10.877
10.8851	0.053276	0.052626	0.053314	0.053235	0.052929	0.053694	0.0538273			10.8851
10.8933	0.053282	0.052632	0.053322	0.053245	0.052934	0.053698	0.0538257			10.8933
10.9015	0.05329	0.052639	0.053331	0.053261	0.052939	0.053706	0.053825			10.9015
10.9097	0.053299	0.052646	0.053343	0.053275	0.052941	0.053714	0.0538195			10.9097
10.9179	0.053307	0.052654	0.053352	0.053286	0.05294	0.053719	0.0538105			10.9179
10.9261	0.053317	0.05266	0.053354	0.053299	0.052941	0.053721	0.0538035			10.9261
10.9343	0.053325	0.052667	0.053361	0.053314	0.052944	0.053723	0.0538009			10.9343
10.9425	0.053334	0.052674	0.053371	0.053333	0.052945	0.053728	0.0538002			10.9425
10.9507	0.053342	0.052679	0.053378	0.053349	0.052946	0.053735	0.0537966			10.9507
10.9589	0.053349	0.052686	0.053388	0.053366	0.052948	0.05374	0.0537934			10.9589
10.9671	0.053358	0.052692	0.053404	0.053385	0.052954	0.053743	0.0537895			10.9671
10.9752	0.053365	0.052694	0.053419	0.053401	0.05296	0.053745	0.0537858			10.9752
10.9834	0.053368	0.052701	0.053428	0.053413	0.052966	0.053753	0.053781			10.9834
10.9916	0.053376	0.052708	0.05344	0.053428	0.052969	0.053763	0.0537771			10.9916
10.9998	0.053385	0.052714	0.053459	0.053447	0.052972	0.053767	0.0537762			10.9998
11.008	0.053393	0.05272	0.053475	0.053464	0.052978	0.053769	0.0537731			11.008
11.0162	0.0534	0.052726	0.053487	0.053479	0.052985	0.053773	0.0537696			11.0162
11.0244	0.053408	0.052737	0.0535	0.053494	0.052987	0.053776	0.0537622			11.0244
11.0326	0.053421	0.052746	0.053513	0.053508	0.05299	0.053781	0.0537526			11.0326
11.0408	0.053432	0.052755	0.053528	0.053522	0.052993	0.053784	0.0537453			11.0408
11.0489	0.053444	0.052766	0.053544	0.053542	0.052994	0.053786	0.0537368			11.0489
11.0571	0.053457	0.052775	0.05356	0.053562	0.052997	0.05379	0.0537308			11.0571
11.0653	0.053469	0.052782	0.053576	0.053581	0.053006	0.053794	0.0537267			11.0653
11.0735	0.053477	0.052785	0.053595	0.0536	0.053015	0.053801	0.0537227			11.0735
11.0817	0.053481	0.052789	0.053611	0.053618	0.053026	0.053804	0.0537149			11.0817
11.0899	0.053486	0.052796	0.053626	0.053639	0.053034	0.053807	0.053708			11.0899
11.0981	0.053495	0.052807	0.053646	0.053662	0.053038	0.053812	0.0537045			11.0981
11.1063	0.053509	0.052817	0.053667	0.05368	0.053044	0.053812	0.0537015			11.1063
11.1145	0.053521	0.052826	0.053688	0.053699	0.053052	0.053813	0.0537002			11.1145
11.1227	0.053532	0.052833	0.053706	0.053726	0.05306	0.053821	0.0536943			11.1227
11.1308	0.053541	0.052841	0.053723	0.053743	0.053066	0.053824	0.0536885			11.1308
11.139	0.053551	0.05285	0.053743	0.05376	0.053069	0.053819	0.053684			11.139
11.1472	0.053563	0.05286	0.053764	0.053783	0.053068	0.053818	0.0536777			11.1472
11.1554	0.053575	0.052871	0.053785	0.053802	0.05307	0.05382	0.0536728			11.1554
11.1636	0.053589	0.052882	0.053804	0.053827	0.053075	0.053821	0.0536698			11.1636
11.1718	0.053602	0.05289	0.053822	0.053855	0.053079	0.053823	0.0536642			11.1718
11.18	0.053613	0.052898	0.05384	0.053881	0.053084	0.053823	0.053658			11.18
11.1882	0.053623	0.052909	0.053861	0.053907	0.05309	0.053823	0.0536562			11.1882
11.1964	0.053636	0.052925	0.053881	0.053933	0.053093	0.053821	0.0536506			11.1964
11.2045	0.053656	0.052941	0.053906	0.053963	0.053099	0.053818	0.0536428			11.2045
11.2127	0.053676	0.052953	0.053927	0.053992	0.053104	0.053817	0.0536372			11.2127
11.2209	0.053691	0.052964	0.053938	0.054017	0.053102	0.053819	0.0536324			11.2209
11.2291	0.053705	0.052976	0.053953	0.054044	0.0531	0.053821	0.0536288			11.2291
11.2373	0.05372	0.05299	0.053965	0.054073	0.053101	0.05382	0.0536276			11.2373
11.2455	0.053737	0.053005	0.053976	0.054105	0.0531	0.053817	0.0536311			11.2455
11.2537	0.053756	0.053017	0.053988	0.05414	0.053094	0.053815	0.0536306			11.2537
11.2619	0.053771	0.05303	0.053997	0.054179	0.053089	0.053813	0.0536273			11.2619
11.2701	0.053787	0.053046	0.054006	0.054215	0.053082	0.053813	0.053626			11.2701
11.2783	0.053808	0.053062	0.054014	0.054247	0.053079	0.053814	0.0536244			11.2783
11.2865	0.053828	0.053078	0.054019	0.054286	0.053078	0.053811	0.0536206			11.2865
11.2946	0.053848	0.05309	0.05402	0.054323	0.053074	0.053805	0.0536121			11.2946
11.3028	0.053862	0.053102	0.054016	0.054354	0.05307	0.053802	0.0536075			11.3028
11.311	0.053878	0.053116	0.054012	0.054389	0.053064	0.053799	0.0536075			11.311
11.3192	0.053895	0.053123	0.054012	0.054424	0.053057	0.053795	0.0536018			11.3192
11.3274	0.053904	0.05313	0.054008	0.054456	0.053053	0.053791	0.0535955			11.3274
11.3356	0.053912	0.053138	0.053999	0.054495	0.053047	0.053789	0.0535925			11.3356
11.3438	0.053922	0.053146	0.053986	0.054537	0.053038	0.053787	0.053588			11.3438
11.352	0.053932	0.053153	0.05397	0.054576	0.053033	0.053786	0.0535835			11.352
11.3602	0.053941	0.053164	0.053961	0.054614	0.05303	0.053783	0.0535811			11.3602
11.3683	0.053955	0.053176	0.053955	0.054654	0.053027	0.053777	0.0535771			11.3683
11.3765	0.05397	0.053185	0.053946	0.054691	0.053021	0.053772	0.0535719			11.3765
11.3847	0.053981	0.053195	0.053937	0.054725	0.053012	0.053764	0.0535698			11.3847
11.3929	0.053994	0.053206	0.053931	0.054757	0.053007	0.053761	0.0535671			11.3929
11.4011	0.054008	0.053218	0.053921	0.054795	0.053004	0.053756	0.0535666			11.4011
11.4093	0.054022	0.053223	0.053907	0.05483	0.053002	0.053749	0.0535681			11.4093
11.4175	0.054029	0.053227	0.053895	0.054864	0.053001	0.053745	0.0535647			11.4175
11.4257	0.054034	0.053236	0.053885	0.054904	0.053	0.05374	0.0535596			11.4257
11.4339	0.054045	0.053242	0.053872	0.054943	0.052997	0.053735	0.053559			11.4339
11.4421	0.054052	0.053246	0.053855	0.054977	0.052991	0.053729	0.0535599			11.4421
11.4503	0.054057	0.053254	0.053843	0.055012	0.052988	0.053728	0.0535589			11.4503
11.4584	0.054068	0.053264	0.053835	0.055047	0.052984	0.053724	0.0535568			11.4584
11.4666	0.05408	0.053275	0.053826	0.055078	0.052982	0.053715	0.0535542			11.4666
11.4748	0.054094	0.053282	0.053819	0.055109	0.052983	0.053712	0.0535505			11.4748
11.483	0.054103	0.053287	0.053816	0.055141	0.052983	0.053711	0.053547			11.483
11.4912	0.054109	0.053295	0.053811	0.055173	0.052979	0.053702	0.053548			11.4912
11.4994	0.054119	0.053301	0.053799	0.055199	0.052975	0.053693	0.0535488			11.4994
11.5076	0.054126	0.053302	0.053793	0.05523	0.052975	0.053688	0.0535424			11.5076
11.5158	0.054128	0.053309	0.053788	0.055261	0.052978	0.053679	0.0535348			11.5158
11.5239	0.054136	0.053318	0.053779	0.055287	0.052979	0.053669	0.0535301			11.5239
11.5321	0.054147	0.053325	0.053771	0.055313	0.052983	0.053666	0.0535291			11.5321
11.5403	0.054156	0.053333	0.053765	0.055336	0.052985	0.053659	0.0535344			11.5403
11.5485	0.054166	0.053342	0.053755	0.055365	0.052979	0.053651	0.0535415			11.5485
11.5567	0.054178	0.053347	0.053744	0.055394	0.052975	0.053651	0.0535454			11.5567
11.5649	0.054184	0.053354	0.053738	0.055412	0.052972	0.053648	0.0535454			11.5649
11.5731	0.054192	0.053363	0.053726	0.055424	0.05297	0.05364	0.0535434			11.5731
11.5813	0.054204	0.053368	0.053715	0.055439	0.052971	0.053631	0.0535389			11.5813
11.5895	0.05421	0.05337	0.053709	0.055451	0.052974	0.053622	0.0535361			11.5895
11.5977	0.054212	0.053376	0.053701	0.055465	0.052975	0.053615	0.0535372			11.5977
11.6059	0.05422	0.053378	0.053695	0.055484	0.052977	0.05361	0.0535387			11.6059
11.614	0.054223	0.053379	0.05369	0.0555	0.052981	0.053605	0.0535406			11.614
11.6222	0.054224	0.053383	0.053686	0.055507	0.05298	0.053601	0.0535414			11.6222
11.6304	0.054229	0.053385	0.053684	0.055515	0.052975	0.053599	0.0535411			11.6304
11.6386	0.054231	0.053386	0.053678	0.055527	0.052973	0.053597	0.0535396			11.6386
11.6468	0.054232	0.053386	0.053668	0.055533	0.052969	0.053591	0.0535394			11.6468
11.655	0.054232	0.053388	0.053659	0.055535	0.052966	0.053582	0.0535406			11.655
11.6632	0.054235	0.053391	0.053653	0.05554	0.052969	0.053576	0.0535398			11.6632
11.6714	0.054239	0.05339	0.053647	0.055544	0.052972	0.053574	0.0535389			11.6714
11.6796	0.054237	0.05339	0.053636	0.05555	0.052973	0.053567	0.0535383			11.6796
11.6877	0.054237	0.053389	0.053626	0.055555	0.052975	0.053564	0.0535398			11.6877
11.6959	0.054236	0.053387	0.053619	0.055555	0.052973	0.053563	0.0535411			11.6959
11.7041	0.054234	0.053388	0.053615	0.055556	0.052973	0.053558	0.0535429			11.7041
11.7123	0.054235	0.05339	0.053609	0.055556	0.052975	0.053551	0.0535474			11.7123
11.7205	0.054238	0.05339	0.053604	0.05555	0.052974	0.053551	0.0535504			11.7205
11.7287	0.054237	0.053384	0.053598	0.05554	0.052973	0.053549	0.0535496			11.7287
11.7369	0.05423	0.053379	0.053592	0.055529	0.052971	0.053541	0.0535512			11.7369
11.7451	0.054224	0.053378	0.053592	0.055523	0.052971	0.053539	0.0535547			11.7451
11.7533	0.054223	0.05338	0.053593	0.055516	0.052971	0.053538	0.0535545			11.7533
11.7615	0.054225	0.053378	0.053589	0.055504	0.052969	0.053533	0.0535537			11.7615
11.7697	0.054222	0.053376	0.053585	0.055492	0.052967	0.053529	0.0535572			11.7697
11.7778	0.05422	0.053375	0.05358	0.055482	0.052968	0.053528	0.0535622			11.7778
11.786	0.054219	0.05337	0.053572	0.055468	0.052969	0.053529	0.0535668			11.786
11.7942	0.054212	0.053364	0.053564	0.055454	0.052969	0.053525	0.0535756			11.7942
11.8024	0.054205	0.053358	0.053557	0.05544	0.052969	0.053518	0.0535854			11.8024
11.8106	0.054197	0.053352	0.05355	0.055424	0.052968	0.053516	0.053591			11.8106
11.8188	0.05419	0.05335	0.053547	0.05541	0.052969	0.053513	0.0535935			11.8188
11.827	0.054188	0.053348	0.053542	0.055398	0.052966	0.053514	0.0535991			11.827
11.8352	0.054185	0.053342	0.053535	0.05538	0.052961	0.053513	0.0536091			11.8352
11.8434	0.054177	0.053337	0.053526	0.055354	0.05296	0.053509	0.0536179			11.8434
11.8515	0.054171	0.053332	0.053518	0.055332	0.052958	0.053508	0.0536255			11.8515
11.8597	0.054165	0.053328	0.05351	0.055312	0.05296	0.053501	0.0536362			11.8597
11.8679	0.05416	0.053326	0.053504	0.055292	0.052964	0.053497	0.0536489			11.8679
11.8761	0.054158	0.053322	0.0535	0.055274	0.052963	0.053493	0.0536601			11.8761
11.8843	0.054153	0.053318	0.053498	0.055254	0.052963	0.053489	0.0536714			11.8843
11.8925	0.054147	0.053312	0.053497	0.055231	0.052963	0.053492	0.0536822			11.8925
11.9007	0.05414	0.053305	0.053494	0.055205	0.052963	0.053493	0.0536958			11.9007
11.9089	0.054131	0.053299	0.053493	0.055175	0.052963	0.053493	0.0537115			11.9089
11.9171	0.054124	0.053294	0.053491	0.055157	0.052958	0.053493	0.0537275			11.9171
11.9253	0.054118	0.053287	0.053485	0.055138	0.052955	0.053488	0.0537484			11.9253
11.9334	0.054109	0.053278	0.053479	0.055112	0.052954	0.053486	0.0537696			11.9334
11.9416	0.054098	0.053272	0.053477	0.055085	0.052954	0.053485	0.0537898			11.9416
11.9498	0.05409	0.053267	0.053474	0.055057	0.052954	0.053487	0.0538104			11.9498
11.958	0.054084	0.053262	0.053469	0.055029	0.052953	0.053489	0.0538346			11.958
11.9662	0.054078	0.053251	0.053465	0.054999	0.05295	0.053492	0.053858			11.9662
11.9744	0.054064	0.053242	0.053462	0.054969	0.052948	0.053494	0.0538735			11.9744
11.9826	0.054052	0.053235	0.053464	0.054938	0.052948	0.053495	0.0538868			11.9826
11.9908	0.054044	0.053222	0.053466	0.054911	0.052948	0.053499	0.053906			11.9908
11.999	0.054028	0.053211	0.05346	0.054891	0.05295	0.0535	0.0539284			11.999
12.0071	0.054014	0.053205	0.053457	0.054869	0.052949	0.053499	0.05395			12.0071
12.0153	0.054006	0.053201	0.053456	0.054843	0.052947	0.053504	0.0539779			12.0153
12.0235	0.054001	0.053196	0.053452	0.054816	0.052948	0.053506	0.0540106			12.0235
12.0317	0.053995	0.053187	0.053446	0.054789	0.052947	0.053506	0.0540455			12.0317
12.0399	0.053984	0.053179	0.053443	0.054764	0.052946	0.053509	0.0540808			12.0399
12.0481	0.053974	0.053172	0.053438	0.054739	0.052944	0.053508	0.0541104			12.0481
12.0563	0.053965	0.053165	0.053432	0.05471	0.052943	0.053507	0.0541378			12.0563
12.0645	0.053956	0.053156	0.053426	0.054686	0.052945	0.053516	0.0541653			12.0645
12.0727	0.053945	0.053147	0.053421	0.054667	0.052947	0.053526	0.0541907			12.0727
12.0809	0.053934	0.053141	0.053418	0.054641	0.052946	0.053532	0.0542148			12.0809
12.0891	0.053926	0.053134	0.053417	0.054615	0.052945	0.053539	0.054243			12.0891
12.0972	0.053917	0.053124	0.053413	0.054591	0.052947	0.053549	0.0542769			12.0972
12.1054	0.053905	0.053116	0.053404	0.054566	0.052949	0.053556	0.0543116			12.1054
12.1136	0.053895	0.053111	0.053398	0.054539	0.052947	0.053563	0.0543419			12.1136
12.1218	0.053889	0.053104	0.053398	0.054516	0.052945	0.053574	0.0543688			12.1218
12.13	0.05388	0.053094	0.053399	0.054497	0.052945	0.053584	0.0543974			12.13
12.1382	0.053867	0.053086	0.053399	0.054477	0.052942	0.053596	0.054426			12.1382
12.1464	0.053857	0.053083	0.053396	0.054457	0.052939	0.053615	0.0544568			12.1464
12.1546	0.053854	0.05308	0.053396	0.054435	0.05294	0.053625	0.0544903			12.1546
12.1628	0.05385	0.053071	0.053395	0.054415	0.05294	0.053628	0.0545216			12.1628
12.1709	0.053839	0.053061	0.053392	0.054401	0.052937	0.053649	0.0545534			12.1709
12.1791	0.053826	0.053055	0.053391	0.054385	0.052935	0.053675	0.0545903			12.1791
12.1873	0.053819	0.05305	0.053382	0.054367	0.052935	0.053693	0.0546264			12.1873
12.1955	0.053813	0.053044	0.053374	0.05435	0.052936	0.053712	0.0546594			12.1955
12.2037	0.053805	0.053036	0.053368	0.05433	0.052938	0.053733	0.0546955			12.2037
12.2119	0.053795	0.053029	0.053363	0.054308	0.052936	0.053757	0.0547316			12.2119
12.2201	0.053786	0.053022	0.053365	0.054289	0.052935	0.053783	0.0547629			12.2201
12.2283	0.053778	0.053014	0.053365	0.054271	0.052937	0.053809	0.0547985			12.2283
12.2365	0.053767	0.053007	0.053363	0.054252	0.052936	0.053837	0.0548414			12.2365
12.2447	0.053759	0.053003	0.053363	0.054235	0.05293	0.053864	0.0548851			12.2447
12.2529	0.053754	0.053	0.05336	0.054219	0.052926	0.053894	0.0549308			12.2529
12.261	0.05375	0.052994	0.053354	0.054204	0.052927	0.053926	0.0549805			12.261
12.2692	0.053743	0.052987	0.053349	0.05419	0.052932	0.053955	0.0550332			12.2692
12.2774	0.053734	0.05298	0.053345	0.054177	0.052938	0.05399	0.0550869			12.2774
12.2856	0.053725	0.052975	0.05334	0.054162	0.052939	0.054023	0.0551456			12.2856
12.2938	0.053719	0.052972	0.05334	0.054149	0.052935	0.054056	0.0552087			12.2938
12.302	0.053715	0.052968	0.053344	0.054137	0.052936	0.054095	0.0552746			12.302
12.3102	0.05371	0.052961	0.053343	0.054121	0.052938	0.054129	0.0553488			12.3102
12.3184	0.053701	0.052954	0.053338	0.054104	0.052936	0.054162	0.0554334			12.3184
12.3265	0.053692	0.052946	0.053331	0.054096	0.052933	0.054205	0.055526			12.3265
12.3347	0.053682	0.052937	0.053327	0.054086	0.052932	0.054249	0.0556271			12.3347
12.3429	0.053671	0.052928	0.053323	0.054069	0.052935	0.054288	0.0557359			12.3429
12.3511	0.05366	0.052926	0.053318	0.054059	0.05294	0.054327	0.0558513			12.3511
12.3593	0.053657	0.052923	0.053316	0.054049	0.052943	0.054364	0.0559794			12.3593
12.3675	0.053654	0.052918	0.053315	0.054038	0.052942	0.054398	0.0561215			12.3675
12.3757	0.053647	0.052917	0.053315	0.054028	0.052937	0.054437	0.0562817			12.3757
12.3839	0.053646	0.052914	0.053316	0.05402	0.052933	0.054475	0.0564607			12.3839
12.3921	0.053643	0.05291	0.05332	0.05401	0.05293	0.054508	0.0566581			12.3921
12.4003	0.053638	0.052902	0.053316	0.054003	0.05293	0.054542	0.0568789			12.4003
12.4085	0.053628	0.052895	0.053307	0.053995	0.052931	0.054577	0.0571259			12.4085
12.4166	0.053619	0.05289	0.053301	0.053984	0.052931	0.054612	0.0574014			12.4166
12.4248	0.053613	0.052882	0.053294	0.053974	0.052933	0.054649	0.0577076			12.4248
12.433	0.053603	0.05288	0.05329	0.053967	0.052932	0.054682	0.0580427			12.433
12.4412	0.0536	0.052881	0.053291	0.05396	0.052928	0.054708	0.058409			12.4412
12.4494	0.053601	0.052878	0.05329	0.053953	0.052926	0.054734	0.0588128			12.4494
12.4576	0.053597	0.052873	0.053287	0.053946	0.052929	0.054762	0.0592541			12.4576
12.4658	0.053591	0.052868	0.053284	0.05394	0.052933	0.054787	0.0597349			12.4658
12.474	0.053585	0.052865	0.053283	0.053936	0.052935	0.054807	0.0602586			12.474
12.4822	0.053581	0.052864	0.053278	0.053931	0.052933	0.054826	0.0608251			12.4822
12.4903	0.05358	0.052862	0.053271	0.053922	0.052932	0.054845	0.0614334			12.4903
12.4985	0.053577	0.052858	0.053263	0.053914	0.052934	0.054864	0.0620864			12.4985
12.5067	0.053572	0.052852	0.053256	0.053909	0.052935	0.05488	0.0627863			12.5067
12.5149	0.053565	0.052848	0.053252	0.053907	0.052935	0.054892	0.0635252			12.5149
12.5231	0.05356	0.052847	0.053254	0.053907	0.052937	0.054903	0.0643032			12.5231
12.5313	0.053559	0.052843	0.053256	0.053904	0.052937	0.05491	0.0651196			12.5313
12.5395	0.053554	0.052835	0.053258	0.053901	0.052937	0.054916	0.0659652			12.5395
12.5477	0.053544	0.052828	0.053261	0.053898	0.05294	0.054922	0.0668343			12.5477
12.5559	0.053535	0.052823	0.05326	0.053896	0.052946	0.054927	0.0677271			12.5559							80412.9
12.5641	0.053529	0.052822	0.053258	0.053897	0.052949	0.054931	0.0686403			12.5641							77232.3
12.5723	0.053528	0.05282	0.053257	0.053901	0.052945	0.054929	0.0695616			12.5723							74594.6
12.5804	0.053525	0.052815	0.053253	0.053905	0.052935	0.054925	0.0704875			12.5804							72579.3
12.5886	0.053519	0.052812	0.05325	0.05391	0.052931	0.054924	0.0714084			12.5886							71294.3
12.5968	0.053515	0.052812	0.05325	0.053912	0.052935	0.054923	0.0723231			12.5968							70677
12.605	0.053515	0.052814	0.053253	0.053912	0.052935	0.054924	0.0732321			12.605							70694.7
12.6132	0.053518	0.052812	0.053255	0.053917	0.052935	0.054926	0.0741285			12.6132							71514.3
12.6214	0.053515	0.052807	0.053256	0.053923	0.052937	0.05492	0.0750065			12.6214							73039.1
12.6296	0.053509	0.052805	0.053255	0.053927	0.052938	0.054913	0.0758627			12.6296							74608.9
12.6378	0.053506	0.052802	0.053256	0.053937	0.052936	0.05491	0.0766944			12.6378							75516.2
12.6459	0.053502	0.052802	0.053263	0.053945	0.052935	0.054905	0.0774963			12.6459							75562.9
12.6541	0.053503	0.052802	0.05327	0.053951	0.052933	0.054899	0.0782638			12.6541							74996.3
12.6623	0.053503	0.052801	0.053264	0.053961	0.05293	0.05489	0.0789991			12.6623							74125.9
12.6705	0.053501	0.052798	0.053259	0.053974	0.052931	0.054884	0.0796967			12.6705							73148.9
12.6787	0.053498	0.052794	0.053261	0.053989	0.05293	0.054881	0.0803526			12.6787							72144.9
12.6869	0.053492	0.052786	0.053261	0.054008	0.052927	0.054882	0.0809717			12.6869							71141.7
12.6951	0.053483	0.052782	0.053258	0.054027	0.052928	0.054881	0.08155			12.6951							70185.5
12.7033	0.053477	0.052782	0.053254	0.054043	0.05293	0.054876	0.0820866			12.7033							69328.8
12.7115	0.053478	0.052779	0.053252	0.054061	0.052935	0.054869	0.0825795			12.7115							68623.3
12.7197	0.053474	0.05277	0.053253	0.054082	0.052939	0.054863	0.0830196			12.7197							68098.1
12.7279	0.053463	0.05277	0.053256	0.0541	0.052934	0.054867	0.0834098			12.7279							67771.9
12.736	0.053463	0.05277	0.05326	0.054127	0.052927	0.054871	0.0837589			12.736							67658.9
12.7442	0.053462	0.052764	0.053266	0.054155	0.052929	0.054873	0.0840649			12.7442							67755.8
12.7524	0.053455	0.052762	0.053273	0.054177	0.052932	0.054879	0.084327			12.7524							68034.2
12.7606	0.053452	0.052765	0.053275	0.054201	0.052932	0.054888	0.0845439			12.7606							68425.1
12.7688	0.053456	0.052766	0.053275	0.054226	0.052931	0.054898	0.0847142			12.7688							68797
12.777	0.053457	0.052765	0.053279	0.054254	0.052927	0.054907	0.0848437			12.777							69117.5
12.7852	0.053456	0.052763	0.053284	0.054284	0.052922	0.054918	0.084929			12.7852							69423.7
12.7934	0.053454	0.052758	0.053285	0.054314	0.052926	0.05494	0.0849676			12.7934							69664.4
12.8016	0.053448	0.052756	0.053283	0.054347	0.052933	0.054966	0.084962			12.8016							69923.7
12.8097	0.053445	0.052755	0.053279	0.054383	0.052935	0.054991	0.084919			12.8097							70167.9
12.8179	0.053444	0.052754	0.053276	0.05442	0.052937	0.05502	0.0848431			12.8179							70429.1
12.8261	0.053443	0.052751	0.053273	0.054456	0.052936	0.055046	0.0847319			12.8261							70713.8
12.8343	0.053439	0.05275	0.05327	0.054492	0.052935	0.055076	0.0845879			12.8343							71069.4
12.8425	0.053437	0.052754	0.053267	0.054525	0.052932	0.055114	0.0844093			12.8425							71481.8
12.8507	0.053442	0.052755	0.053264	0.054561	0.052931	0.055156	0.0842007			12.8507							71921.4
12.8589	0.053444	0.05275	0.053261	0.054597	0.052936	0.055204	0.0839614			12.8589							72313.8
12.8671	0.053437	0.052749	0.053259	0.05463	0.052939	0.055251	0.0836892			12.8671							72595.4
12.8753	0.053436	0.05275	0.053253	0.054661	0.05294	0.055302	0.0833941			12.8753							72826.2
12.8835	0.053437	0.052745	0.053247	0.05469	0.052944	0.055367	0.0830758			12.8835							73065.7
12.8917	0.053431	0.052743	0.053243	0.054721	0.052947	0.05544	0.0827372			12.8917							73332.8
12.8998	0.053429	0.052741	0.053235	0.054751	0.052946	0.055515	0.0823786			12.8998							73618.8
12.908	0.053426	0.05274	0.053228	0.054782	0.052947	0.055596	0.0819977			12.908							73914.2
12.9162	0.053425	0.052744	0.05322	0.054815	0.052946	0.055686	0.0816025			12.9162							74201.4
12.9244	0.05343	0.052742	0.053213	0.054844	0.052944	0.055784	0.0811937			12.9244							74479.2
12.9326	0.053428	0.052738	0.053214	0.05487	0.052949	0.055892	0.0807712			12.9326							74782.7
12.9408	0.053422	0.052735	0.053211	0.054896	0.052951	0.056011	0.0803384			12.9408							75145.1
12.949	0.053419	0.052734	0.053204	0.054921	0.052946	0.056137	0.0798942			12.949							75577.4
12.9572	0.053417	0.05273	0.053203	0.054943	0.052945	0.056273	0.0794379			12.9572							76059.9
12.9654	0.053412	0.05273	0.053204	0.054959	0.052948	0.056425	0.0789765			12.9654							76555.4
12.9735	0.053413	0.05273	0.0532	0.054978	0.052951	0.056591	0.0785105			12.9735							77027.9
12.9817	0.053413	0.052726	0.053194	0.054999	0.052949	0.056767	0.0780378			12.9817							77450.5
12.9899	0.053408	0.052724	0.053188	0.055019	0.052947	0.056958	0.077561			12.9899							77817.5
12.9981	0.053405	0.052722	0.053181	0.055037	0.052946	0.05716	0.0770829			12.9981							78155.5
13.0063	0.053403	0.052719	0.053174	0.055051	0.052943	0.057375	0.0766029			13.0063							78510.5
13.0145	0.053399	0.052719	0.053171	0.055061	0.052945	0.05761	0.0761195			13.0145							78944.2
13.0227	0.053399	0.052716	0.053169	0.055068	0.052949	0.057866	0.075635			13.0227							79539.1
13.0309	0.053395	0.052714	0.053168	0.055078	0.052949	0.058145	0.0751556			13.0309							80376.6
13.0391	0.053392	0.052714	0.053166	0.055086	0.052948	0.058441	0.0746779			13.0391
13.0473	0.053393	0.052717	0.053162	0.055089	0.052948	0.05876	0.0741996			13.0473
13.0554	0.053396	0.052714	0.053157	0.05509	0.052947	0.059102	0.0737249			13.0554
13.0636	0.053393	0.052711	0.053152	0.05509	0.052949	0.059462	0.0732555			13.0636
13.0718	0.053389	0.052712	0.053149	0.055088	0.052947	0.059851	0.0727884			13.0718
13.08	0.05339	0.052713	0.053146	0.055085	0.052945	0.06027	0.0723243			13.08
13.0882	0.053391	0.052713	0.053142	0.055082	0.052946	0.060713	0.0718717			13.0882
13.0964	0.053391	0.052713	0.053142	0.055079	0.052948	0.061178	0.0714299			13.0964
13.1046	0.053391	0.052716	0.053143	0.055077	0.052948	0.061672	0.070996			13.1046
13.1128	0.053395	0.052717	0.05314	0.055071	0.052945	0.062198	0.0705697			13.1128
13.121	0.053396	0.052716	0.053133	0.055067	0.052941	0.062753	0.070151			13.121
13.1291	0.053395	0.052715	0.053131	0.055067	0.05294	0.06334	0.0697416			13.1291
13.1373	0.053394	0.052713	0.05313	0.055065	0.052941	0.063961	0.0693394			13.1373
13.1455	0.053391	0.052711	0.053128	0.055061	0.052942	0.064607	0.0689459			13.1455
13.1537	0.053389	0.052712	0.053128	0.055057	0.052939	0.06528	0.0685597			13.1537
13.1619	0.05339	0.052709	0.053132	0.055053	0.052936	0.065988	0.0681814			13.1619
13.1701	0.053386	0.052704	0.053136	0.055053	0.052941	0.066724	0.0678188			13.1701
13.1783	0.05338	0.052701	0.053135	0.055046	0.052946	0.067493	0.0674647			13.1783
13.1865	0.053376	0.052695	0.053136	0.055037	0.052947	0.068295	0.0671142			13.1865
13.1947	0.053369	0.052693	0.05314	0.055038	0.052947	0.069121	0.0667719			13.1947
13.2029	0.053366	0.052694	0.053144	0.055039	0.052949	0.069973	0.0664399			13.2029
13.2111	0.053367	0.052693	0.053146	0.055037	0.05295	0.070844	0.0661208			13.2111
13.2192	0.053366	0.052693	0.053145	0.05504	0.05295	0.071737	0.0658112			13.2192
13.2274	0.053366	0.052694	0.053144	0.055049	0.052947	0.072657	0.0655092			13.2274
13.2356	0.053368	0.052695	0.053148	0.05506	0.052946	0.073594	0.065219			13.2356
13.2438	0.053369	0.052695	0.053154	0.055065	0.052946	0.074546	0.0649388			13.2438
13.252	0.053369	0.052696	0.053159	0.055073	0.052947	0.075507	0.0646683			13.252
13.2602	0.05337	0.052697	0.053162	0.055091	0.052948	0.07648	0.0644042			13.2602
13.2684	0.053371	0.052695	0.053163	0.055111	0.052951	0.077458	0.0641482			13.2684
13.2766	0.053369	0.052694	0.05317	0.055129	0.052954	0.078437	0.0639025			13.2766
13.2848	0.053368	0.052695	0.053179	0.05515	0.052956	0.079422	0.0636614			13.2848
13.2929	0.053369	0.052694	0.053183	0.055178	0.052956	0.080398	0.0634269			13.2929
13.3011	0.053368	0.052694	0.053187	0.055209	0.052953	0.08137	0.0632023			13.3011
13.3093	0.053367	0.052697	0.053193	0.055243	0.052952	0.082337	0.0629824			13.3093
13.3175	0.053371	0.052697	0.053198	0.055284	0.05295	0.08329	0.0627695			13.3175
13.3257	0.053371	0.052694	0.053203	0.055333	0.052951	0.084225	0.0625642			13.3257
13.3339	0.053368	0.052697	0.053211	0.055383	0.052952	0.085138	0.0623622			13.3339
13.3421	0.053371	0.052695	0.053218	0.055439	0.052952	0.086028	0.0621655			13.3421
13.3503	0.053369	0.052693	0.053226	0.055503	0.052954	0.086898	0.0619794			13.3503
13.3585	0.053366	0.052696	0.053234	0.055571	0.052956	0.087734	0.0617992			13.3585
13.3667	0.05337	0.052698	0.05324	0.055646	0.052958	0.088542	0.0616203			13.3667
13.3749	0.053372	0.052697	0.053247	0.055728	0.05296	0.089322	0.0614465			13.3749
13.383	0.053371	0.052693	0.053252	0.055817	0.05296	0.090067	0.061276			13.383
13.3912	0.053366	0.052693	0.053257	0.055917	0.052956	0.090773	0.0611117			13.3912
13.3994	0.053366	0.052692	0.053263	0.056024	0.052955	0.091439	0.0609571			13.3994
13.4076	0.053365	0.052688	0.053268	0.056141	0.05296	0.092065	0.0608081			13.4076
13.4158	0.05336	0.052683	0.053274	0.056273	0.052963	0.092654	0.0606668			13.4158
13.424	0.053354	0.052682	0.053282	0.056414	0.052965	0.093208	0.0605295			13.424
13.4322	0.053353	0.052683	0.05329	0.05657	0.052965	0.093719	0.0603948			13.4322
13.4404	0.053354	0.052685	0.053298	0.056737	0.052966	0.094182	0.0602654			13.4404
13.4485	0.053356	0.052685	0.053307	0.056919	0.052966	0.09461	0.0601411			13.4485
13.4567	0.053356	0.052682	0.053314	0.057113	0.052964	0.095001	0.0600288			13.4567
13.4649	0.053352	0.052683	0.053318	0.057316	0.052964	0.095349	0.0599252			13.4649
13.4731	0.053354	0.052685	0.053321	0.05754	0.052966	0.095653	0.0598253			13.4731
13.4813	0.053356	0.052682	0.053321	0.057782	0.052964	0.095915	0.0597306			13.4813
13.4895	0.053353	0.052678	0.053327	0.058048	0.052962	0.096139	0.0596427			13.4895
13.4977	0.053347	0.052677	0.053333	0.058335	0.05296	0.096321	0.0595621			13.4977
13.5059	0.053346	0.052677	0.053334	0.058637	0.05296	0.096465	0.0594906			13.5059
13.5141	0.053346	0.052674	0.053337	0.058963	0.052965	0.096575	0.0594283			13.5141
13.5223	0.053343	0.052672	0.053339	0.059315	0.052972	0.09665	0.059374			13.5223
13.5305	0.05334	0.052674	0.053338	0.05969	0.052973	0.09669	0.0593244			13.5305
13.5386	0.053343	0.052677	0.053333	0.060087	0.052972	0.096698	0.0592791			13.5386
13.5468	0.053346	0.052677	0.053331	0.060509	0.052973	0.096675	0.0592455			13.5468
13.555	0.053346	0.052678	0.053333	0.060966	0.052976	0.09662	0.0592197			13.555
13.5632	0.053347	0.052678	0.053333	0.061448	0.052973	0.096536	0.0592002			13.5632
13.5714	0.053348	0.052676	0.053328	0.061956	0.052967	0.096426	0.0591871			13.5714
13.5796	0.053345	0.052678	0.053323	0.062497	0.052965	0.096288	0.0591815			13.5796
13.5878	0.053347	0.052676	0.053318	0.063071	0.052966	0.096123	0.0591893			13.5878
13.596	0.053345	0.052674	0.053313	0.063675	0.052963	0.095936	0.0592052			13.596
13.6042	0.053342	0.052674	0.053307	0.064306	0.052958	0.095725	0.0592265			13.6042
13.6123	0.053343	0.052673	0.0533	0.064968	0.052959	0.095495	0.0592565			13.6123
13.6205	0.053341	0.052671	0.053293	0.065661	0.052962	0.095241	0.0592937			13.6205
13.6287	0.053339	0.052671	0.053285	0.066383	0.052961	0.094964	0.0593337			13.6287
13.6369	0.053339	0.052673	0.05328	0.067139	0.052958	0.094674	0.0593777			13.6369
13.6451	0.053341	0.052671	0.053271	0.067923	0.05296	0.094367	0.0594317			13.6451
13.6533	0.053339	0.052667	0.053261	0.06873	0.052963	0.094042	0.0594953			13.6533
13.6615	0.053334	0.052666	0.053256	0.069572	0.052967	0.093702	0.0595581			13.6615
13.6697	0.053332	0.052667	0.053251	0.070445	0.052968	0.093348	0.0596192			13.6697
13.6779	0.053334	0.052668	0.053242	0.071344	0.052967	0.092981	0.0596843			13.6779
13.6861	0.053335	0.052669	0.053231	0.072266	0.052965	0.0926	0.0597512			13.6861
13.6943	0.053336	0.05267	0.053229	0.073207	0.052962	0.092208	0.059819			13.6943
13.7024	0.053337	0.05267	0.053226	0.074166	0.052959	0.091805	0.0598863			13.7024
13.7106	0.053337	0.052667	0.053214	0.075139	0.052955	0.091397	0.0599512			13.7106
13.7188	0.053334	0.052665	0.053201	0.076131	0.052951	0.09098	0.060012			13.7188
13.727	0.053331	0.052667	0.053194	0.077133	0.052946	0.090548	0.0600671			13.727
13.7352	0.053334	0.052669	0.053188	0.078142	0.052945	0.090114	0.0601157			13.7352
13.7434	0.053336	0.052669	0.053182	0.079159	0.052947	0.089679	0.060159			13.7434
13.7516	0.053336	0.05267	0.053175	0.08017	0.052954	0.089232	0.0601982			13.7516
13.7598	0.053337	0.052668	0.053166	0.081178	0.052959	0.088779	0.0602326			13.7598
13.768	0.053335	0.052667	0.053155	0.082186	0.05296	0.088323	0.0602614			13.768
13.7761	0.053334	0.052667	0.053147	0.083183	0.052959	0.087862	0.0602812			13.7761
13.7843	0.053334	0.052667	0.053144	0.084167	0.052962	0.087397	0.0602928			13.7843
13.7925	0.053334	0.052671	0.053138	0.085138	0.052967	0.086926	0.0602933			13.7925
13.8007	0.053339	0.052671	0.053129	0.08609	0.052971	0.086455	0.0602844			13.8007
13.8089	0.053339	0.05267	0.05312	0.08702	0.05297	0.085981	0.0602709			13.8089
13.8171	0.053338	0.052674	0.05311	0.087925	0.052967	0.0855	0.0602526			13.8171
13.8253	0.053342	0.052673	0.053101	0.088802	0.052966	0.085018	0.0602315			13.8253
13.8335	0.053341	0.052668	0.053093	0.089655	0.052967	0.084537	0.0602022			13.8335
13.8417	0.053335	0.052664	0.053089	0.09047	0.052971	0.084057	0.0601658			13.8417
13.8498	0.05333	0.052665	0.053089	0.091253	0.052969	0.083576	0.0601226			13.8498
13.858	0.053331	0.052669	0.053088	0.092003	0.052971	0.083091	0.0600704			13.858
13.8662	0.053336	0.052667	0.053085	0.092712	0.052977	0.082602	0.0600129			13.8662						82747.5
13.8744	0.053334	0.052666	0.053082	0.093381	0.052979	0.082112	0.0599532			13.8744						81975
13.8826	0.053333	0.052666	0.053076	0.094003	0.052977	0.081628	0.0598877			13.8826						80998.2
13.8908	0.053332	0.052662	0.053068	0.094586	0.052978	0.081146	0.0598123			13.8908						80236.7
13.899	0.053327	0.052663	0.053061	0.09513	0.052985	0.08066	0.0597297			13.899						79451.2
13.9072	0.053329	0.052665	0.053057	0.095627	0.052988	0.080175	0.0596429			13.9072						78679.4
13.9154	0.053331	0.052664	0.053054	0.096087	0.052985	0.07969	0.0595559			13.9154						77958.4
13.9236	0.05333	0.052665	0.05305	0.096511	0.052984	0.079204	0.0594658			13.9236						77296
13.9317	0.053331	0.052665	0.05305	0.096887	0.052984	0.078723	0.0593718			13.9317						76698.2
13.9399	0.053331	0.052663	0.053049	0.097214	0.052982	0.07824	0.0592782			13.9399						76223
13.9481	0.053329	0.052663	0.053045	0.097504	0.052981	0.077758	0.0591838			13.9481						76053.4
13.9563	0.053329	0.052665	0.053042	0.097758	0.052984	0.077281	0.0590877			13.9563						75862.1
13.9645	0.053331	0.052666	0.05304	0.097966	0.052992	0.076804	0.0589837			13.9645						75518.8
13.9727	0.053332	0.052668	0.05304	0.09813	0.052998	0.076326	0.0588755			13.9727						75078.8
13.9809	0.053335	0.052673	0.053037	0.09826	0.053003	0.075846	0.0587705			13.9809						74612.5
13.9891	0.053341	0.052674	0.053032	0.098355	0.053003	0.075373	0.058666			13.9891						74175
13.9973	0.053342	0.052672	0.053026	0.098409	0.053001	0.074906	0.0585587			13.9973						73745.9
14.0055	0.05334	0.052673	0.053021	0.09843	0.053001	0.074438	0.0584462			14.0055						73348.7
14.0137	0.053341	0.052677	0.053018	0.09842	0.053003	0.073972	0.0583331			14.0137						73017.2
14.0218	0.053346	0.052678	0.053017	0.098381	0.05301	0.073511	0.0582212			14.0218						72757.8
14.03	0.053347	0.052674	0.05302	0.098314	0.053013	0.073051	0.0581131			14.03						72621.5
14.0382	0.053343	0.052676	0.05302	0.098206	0.053017	0.072592	0.0580024			14.0382						72603.1
14.0464	0.053345	0.052678	0.053016	0.098069	0.053021	0.07214	0.0578902			14.0464						72621.9
14.0546	0.053347	0.052678	0.053015	0.097907	0.053023	0.071693	0.0577854			14.0546						72657.9
14.0628	0.053348	0.052682	0.053013	0.097722	0.05303	0.071246	0.0576811			14.0628						72746.3
14.071	0.053352	0.052683	0.053011	0.097514	0.053035	0.070805	0.0575763			14.071						72801.9
14.0792	0.053354	0.052683	0.053006	0.097282	0.053043	0.070365	0.057472			14.0792						72722.2
14.0874	0.053354	0.052681	0.053004	0.09703	0.053053	0.069927	0.0573696			14.0874				55548.9		72413.7
14.0955	0.053351	0.05268	0.053005	0.096757	0.053059	0.069494	0.0572702			14.0955				55066.2		72376.1
14.1037	0.05335	0.052684	0.053004	0.096462	0.053067	0.069068	0.0571688			14.1037				54574.7		72486.4
14.1119	0.053355	0.052686	0.053003	0.096149	0.053076	0.068653	0.0570717			14.1119				54174.5		72599.3
14.1201	0.053358	0.052688	0.053	0.095817	0.053085	0.068239	0.056977			14.1201				53931.4		72633.9
14.1283	0.05336	0.05269	0.053	0.095472	0.0531	0.067825	0.0568843			14.1283				53804.1		72494.8
14.1365	0.053362	0.052691	0.052996	0.095114	0.053113	0.067419	0.0567983			14.1365				53784.5		72377
14.1447	0.053364	0.05269	0.052994	0.094736	0.05312	0.067026	0.0567109			14.1447				53776.7		72394.8
14.1529	0.053363	0.052692	0.052993	0.094346	0.053127	0.066635	0.056621			14.1529				53715.4		72460.6
14.1611	0.053365	0.05269	0.052992	0.093949	0.05314	0.066246	0.0565344			14.1611				53570.3		72496.4
14.1692	0.053363	0.052691	0.052993	0.093539	0.053149	0.065864	0.0564471			14.1692				53241.2		72389.5
14.1774	0.053364	0.052697	0.052996	0.093121	0.053155	0.065485	0.0563597			14.1774				52981.2		72412.6
14.1856	0.053371	0.052698	0.052996	0.092697	0.053168	0.065118	0.0562787			14.1856				52749.6		72568.7
14.1938	0.053373	0.052696	0.052994	0.092257	0.053188	0.064761	0.0562002			14.1938				52486.3
14.202	0.05337	0.052694	0.052995	0.091812	0.053213	0.064407	0.0561216			14.202				52130.9
14.2102	0.053368	0.052697	0.052995	0.091364	0.053242	0.064065	0.056049			14.2102				51861.2
14.2184	0.053371	0.052698	0.052993	0.090908	0.053267	0.063737	0.0559822			14.2184				51627.1
14.2266	0.053373	0.052699	0.052992	0.090446	0.053287	0.063415	0.0559145			14.2266				51334.6
14.2348	0.053374	0.0527	0.052993	0.089977	0.053311	0.063092	0.0558473			14.2348				50965.8
14.243	0.053375	0.052701	0.052987	0.089502	0.053342	0.062776	0.0557801			14.243				50610.9
14.2512	0.053376	0.052704	0.052986	0.089026	0.053374	0.062473	0.055717			14.2512				50273.6
14.2593	0.05338	0.052708	0.052986	0.088547	0.053407	0.062181	0.0556557			14.2593				49996.8
14.2675	0.053385	0.052713	0.052983	0.088065	0.053447	0.061898	0.0555924			14.2675				49780.8
14.2757	0.053391	0.052714	0.052983	0.087576	0.053491	0.061621	0.0555349			14.2757				49592
14.2839	0.053392	0.052714	0.052984	0.087088	0.053541	0.061352	0.0554816			14.2839				49421.5
14.2921	0.053392	0.052718	0.052983	0.086599	0.053595	0.061091	0.0554274			14.2921				49303.2
14.3003	0.053397	0.05272	0.052982	0.086103	0.053651	0.060836	0.0553713			14.3003				49168.9
14.3085	0.0534	0.052724	0.052984	0.085613	0.053712	0.060593	0.0553166			14.3085				48926.8
14.3167	0.053405	0.052727	0.052987	0.085122	0.053786	0.060358	0.0552686			14.3167				48657.2
14.3249	0.053409	0.052731	0.05299	0.084625	0.053872	0.060128	0.0552249			14.3249				48319.6
14.3331	0.053414	0.052738	0.052999	0.08413	0.053968	0.059912	0.0551819			14.3331				47955.6
14.3412	0.053422	0.052738	0.053003	0.08364	0.054078	0.059705	0.0551389			14.3412				47685.2
14.3494	0.053423	0.052736	0.053008	0.083145	0.054207	0.059503	0.0550968			14.3494				47548.2
14.3576	0.05342	0.052733	0.053015	0.082646	0.054357	0.05931	0.0550562			14.3576				47487.9
14.3658	0.053416	0.052732	0.053014	0.082154	0.054538	0.059124	0.055015			14.3658				47472.9
14.374	0.053415	0.052732	0.053013	0.081662	0.054757	0.058947	0.0549778			14.374				47432.2
14.3822	0.053415	0.052734	0.053015	0.081169	0.055023	0.058779	0.0549444			14.3822				47388.1
14.3904	0.053417	0.052734	0.053018	0.080679	0.055355	0.058619	0.0549105			14.3904				47346.5
14.3986	0.053418	0.052734	0.053021	0.080191	0.055769	0.058468	0.0548755			14.3986				47105.5
14.4068	0.053417	0.052736	0.053028	0.079706	0.056293	0.058323	0.0548414			14.4068				46824.2
14.4149	0.05342	0.052738	0.053036	0.079224	0.056963	0.058183	0.0548092			14.4149				46578.9
14.4231	0.053423	0.052739	0.053041	0.078737	0.057827	0.058049	0.0547785			14.4231				46298.5
14.4313	0.053424	0.052742	0.053051	0.078254	0.05895	0.057922	0.0547458			14.4313				45949.2
14.4395	0.053428	0.052742	0.053065	0.077771	0.060394	0.0578	0.0547166			14.4395				45717.9
14.4477	0.053428	0.052743	0.05308	0.077289	0.062238	0.057684	0.0546919			14.4477				45688
14.4559	0.053429	0.052745	0.053095	0.076812	0.064563	0.057571	0.0546645			14.4559				45749.3
14.4641	0.053431	0.052745	0.053104	0.076337	0.067455	0.057468	0.0546356			14.4641				45779.6
14.4723	0.053431	0.052743	0.053112	0.075864	0.070993	0.057372	0.0546107			14.4723				45583.4
14.4805	0.053429	0.052742	0.053119	0.075389	0.075235	0.057278	0.0545882			14.4805				45252.9
14.4887	0.053427	0.052746	0.053132	0.074917	0.080248	0.05719	0.0545633			14.4887				45009.2
14.4969	0.053432	0.052747	0.05315	0.07445	0.086102	0.057104	0.0545428			14.4969				44865.3
14.505	0.053434	0.052744	0.05317	0.073986	0.09283	0.057022	0.0545249			14.505				44676.2
14.5132	0.05343	0.052744	0.053191	0.073524	0.100464	0.056944	0.0545014			14.5132				44468
14.5214	0.05343	0.052743	0.053215	0.073066	0.108985	0.056869	0.0544793			14.5214				44377.4
14.5296	0.053429	0.052742	0.053241	0.072616	0.118328	0.0568	0.0544637			14.5296				44366.3
14.5378	0.053427	0.052742	0.053272	0.07217	0.128367	0.056738	0.054448			14.5378
14.546	0.053427	0.052739	0.053308	0.071723	0.138882	0.056676	0.0544321			14.546
14.5542	0.053424	0.052737	0.053347	0.07128	0.149656	0.056618	0.0544177			14.5542
14.5624	0.053421	0.052741	0.053389	0.070837	0.160377	0.05656	0.0544026			14.5624
14.5706	0.053426	0.052742	0.053433	0.070394	0.170748	0.056504	0.0543848			14.5706					53939.9
14.5787	0.053427	0.052738	0.053483	0.069964	0.180531	0.05645	0.0543663			14.5787					53834.8
14.5869	0.053422	0.052737	0.053544	0.069538	0.189488	0.056396	0.0543499			14.5869					53223.2
14.5951	0.053421	0.052736	0.053616	0.069118	0.197477	0.056346	0.0543365			14.5951					52612.1
14.6033	0.05342	0.052734	0.053696	0.068705	0.204377	0.056301	0.0543266			14.6033					52033.8
14.6115	0.053417	0.052732	0.053785	0.068292	0.210148	0.05626	0.0543173			14.6115					51525.1
14.6197	0.053415	0.05273	0.053885	0.067886	0.214814	0.056219	0.0543089			14.6197					51094.8
14.6279	0.053413	0.05273	0.053994	0.067487	0.218398	0.056179	0.0542996			14.6279					50754.6
14.6361	0.053412	0.052725	0.054119	0.067091	0.220966	0.05614	0.0542877			14.6361					50536.3
14.6443	0.053406	0.052722	0.054266	0.066702	0.22261	0.056101	0.0542775			14.6443					50460.7
14.6524	0.053402	0.052722	0.054433	0.06632	0.223417	0.056064	0.0542673			14.6524					50520.7
14.6606	0.053402	0.052717	0.054624	0.065943	0.22348	0.056029	0.0542551			14.6606					50709
14.6688	0.053396	0.052714	0.054841	0.065571	0.222878	0.055992	0.0542445			14.6688					51049.5
14.677	0.053392	0.052711	0.055088	0.065205	0.221698	0.055958	0.0542316			14.677					51396.1
14.6852	0.053389	0.052708	0.055369	0.064849	0.220018	0.055926	0.0542191			14.6852					51765.6
14.6934	0.053385	0.052704	0.055689	0.064502	0.217907	0.055897	0.0542133			14.6934					52224.4
14.7016	0.05338	0.052703	0.056056	0.064157	0.215412	0.055863	0.0542071			14.7016					52645.2
14.7098	0.053379	0.052703	0.056469	0.063822	0.212598	0.055828	0.0541996			14.7098
14.718	0.053379	0.052706	0.056931	0.0635	0.209514	0.055792	0.0541934			14.718
14.7262	0.053382	0.052708	0.057454	0.063187	0.206199	0.055757	0.0541859			14.7262
14.7343	0.053385	0.052702	0.058049	0.06288	0.202702	0.055727	0.0541768			14.7343
14.7425	0.053377	0.052694	0.058713	0.062575	0.199056	0.055699	0.0541693			14.7425
14.7507	0.053368	0.052691	0.059451	0.062278	0.195285	0.055675	0.0541636			14.7507
14.7589	0.053364	0.05269	0.060274	0.06199	0.191424	0.055647	0.0541563			14.7589
14.7671	0.053362	0.052693	0.061188	0.061715	0.187482	0.055617	0.0541462			14.7671
14.7753	0.053366	0.052691	0.0622	0.061446	0.183486	0.055591	0.0541376			14.7753
14.7835	0.053364	0.052686	0.063312	0.061182	0.17946	0.055565	0.0541319			14.7835
14.7917	0.053358	0.052685	0.064528	0.060931	0.175414	0.055537	0.0541243			14.7917
14.7999	0.053356	0.052682	0.065862	0.060687	0.171368	0.055509	0.0541166			14.7999
14.8081	0.053352	0.052682	0.067313	0.060452	0.167326	0.055484	0.054112			14.8081
14.8163	0.053353	0.052684	0.068875	0.060228	0.163312	0.055456	0.0541087			14.8163
14.8244	0.053355	0.052683	0.070558	0.060009	0.159343	0.055429	0.0541064			14.8244
14.8326	0.053354	0.052682	0.072362	0.059798	0.155413	0.055404	0.054104			14.8326
14.8408	0.053352	0.05268	0.074286	0.059595	0.151538	0.055385	0.0540983			14.8408
14.849	0.05335	0.052681	0.076331	0.059402	0.147725	0.055364	0.054092			14.849
14.8572	0.053351	0.052679	0.078485	0.059215	0.143984	0.055339	0.0540894			14.8572
14.8654	0.053349	0.052675	0.080747	0.059038	0.140324	0.05532	0.0540872			14.8654
14.8736	0.053344	0.052674	0.083112	0.058872	0.136746	0.055298	0.0540836			14.8736
14.8818	0.053343	0.052674	0.085562	0.058711	0.133259	0.055278	0.054079			14.8818
14.89	0.053342	0.052672	0.088089	0.05855	0.129865	0.055259	0.0540717			14.89			25700.9
14.8981	0.05334	0.05267	0.090685	0.058396	0.126564	0.055235	0.0540664			14.8981			25788.1
14.9063	0.053337	0.052669	0.093333	0.058254	0.123366	0.055216	0.0540653			14.9063			25803.2
14.9145	0.053336	0.052669	0.096006	0.05812	0.120261	0.055197	0.0540597			14.9145			25720.4
14.9227	0.053336	0.052666	0.09869	0.057991	0.117257	0.055176	0.0540558			14.9227			25579.9
14.9309	0.053332	0.052663	0.101368	0.057869	0.114362	0.055161	0.0540534			14.9309			25415.7
14.9391	0.053329	0.052659	0.104017	0.057751	0.111567	0.05515	0.0540458			14.9391			25237.7
14.9473	0.053324	0.052655	0.106625	0.057635	0.108871	0.055138	0.0540426			14.9473			25076.1
14.9555	0.053319	0.052656	0.109163	0.057524	0.106272	0.055127	0.0540415			14.9555			24973.1
14.9637	0.05332	0.052656	0.111602	0.057424	0.103776	0.055115	0.0540393			14.9637			24966.7
14.9718	0.05332	0.052658	0.113927	0.057333	0.101385	0.055103	0.0540387			14.9718			25074.5
14.98	0.053322	0.052661	0.116118	0.057244	0.099089	0.055097	0.0540412			14.98			25300.3
14.9882	0.053326	0.052661	0.11815	0.057156	0.096887	0.055088	0.0540394			14.9882			25643.5
14.9964	0.053326	0.05266	0.120002	0.057077	0.094779	0.055077	0.0540337			14.9964			25087.7
15.0046	0.053325	0.052659	0.121659	0.057003	0.092757	0.055069	0.0540355			15.0046			25603.6
15.0128	0.053324	0.052662	0.123111	0.056933	0.090824	0.055063	0.0540395			15.0128			25167.6
15.021	0.053327	0.052663	0.124339	0.056866	0.088974	0.055063	0.0540377			15.021			25763.4
15.0292	0.053329	0.052664	0.125331	0.056802	0.087204	0.055059	0.0540324			15.0292			25354.3
15.0374	0.05333	0.052664	0.126076	0.056737	0.085511	0.05505	0.0540293			15.0374			25886.1
15.0456	0.05333	0.052662	0.126573	0.056676	0.083897	0.055046	0.0540273			15.0456			25315.4
15.0538	0.053327	0.052662	0.126825	0.05662	0.082357	0.055044	0.0540245			15.0538			25535.9
15.0619	0.053327	0.052664	0.126824	0.056564	0.080888	0.055037	0.0540255			15.0619			25526.2
15.0701	0.05333	0.052666	0.12657	0.05651	0.079492	0.055033	0.0540244			15.0701			25307.7
15.0783	0.053332	0.052664	0.126076	0.056459	0.078162	0.055031	0.0540189			15.0783			25971
15.0865	0.05333	0.052663	0.12535	0.056413	0.07689	0.055027	0.054018			15.0865			25565.1
15.0947	0.053329	0.052663	0.124399	0.056367	0.075679	0.055024	0.0540202			15.0947			25119.9
15.1029	0.053329	0.05266	0.123237	0.056321	0.074526	0.055027	0.0540214			15.1029			25666.7
15.1111	0.053325	0.052657	0.121882	0.056281	0.073432	0.055036	0.054023			15.1111			25228.5
15.1193	0.053321	0.052655	0.120348	0.056241	0.072393	0.055035	0.0540237			15.1193			26827.3
15.1275	0.053319	0.052654	0.11866	0.056197	0.071409	0.055032	0.0540194			15.1275			26478.6
15.1357	0.053318	0.052657	0.11684	0.056159	0.07047	0.055035	0.0540117			15.1357			26194.4
15.1438	0.053321	0.052659	0.114906	0.056122	0.069571	0.055036	0.0540073			15.1438			25977.3
15.152	0.053324	0.052659	0.112873	0.056083	0.068718	0.055037	0.0540079			15.152			25825.3
15.1602	0.053324	0.052661	0.110756	0.056047	0.067914	0.055036	0.0540072			15.1602			25765.1
15.1684	0.053326	0.052661	0.108585	0.056012	0.06715	0.055036	0.0540066			15.1684			25823.5
15.1766	0.053326	0.052662	0.106378	0.05598	0.066426	0.055039	0.0540105			15.1766			26014.3
15.1848	0.053327	0.052662	0.104148	0.055947	0.065742	0.05504	0.0540127			15.1848			26347.8
15.193	0.053328	0.052662	0.101913	0.055915	0.065095	0.055037	0.0540144			15.193			26833.8
15.2012	0.053328	0.052663	0.099683	0.055884	0.064485	0.055034	0.0540123			15.2012
15.2094	0.053329	0.052664	0.097474	0.055853	0.063907	0.055032	0.0540066			15.2094
15.2175	0.05333	0.052666	0.095302	0.055824	0.06336	0.055031	0.054002			15.2175
15.2257	0.053333	0.052667	0.093175	0.055793	0.062838	0.055031	0.0539968			15.2257
15.2339	0.053334	0.052667	0.091109	0.055765	0.062346	0.055031	0.0539964			15.2339
15.2421	0.053334	0.052666	0.0891	0.055738	0.061882	0.055029	0.0539969			15.2421
15.2503	0.053332	0.052665	0.087152	0.055706	0.061441	0.055023	0.0539946			15.2503
15.2585	0.053331	0.052664	0.085276	0.055678	0.061027	0.055021	0.0539942			15.2585
15.2667	0.05333	0.052662	0.083472	0.055654	0.06064	0.055016	0.0539969			15.2667
15.2749	0.053327	0.052662	0.081748	0.055628	0.060274	0.055005	0.0539953			15.2749
15.2831	0.053328	0.052666	0.080099	0.055599	0.059927	0.055001	0.0539897			15.2831
15.2913	0.053333	0.052666	0.078519	0.055574	0.059595	0.054995	0.0539876			15.2913
15.2995	0.053333	0.052665	0.07702	0.055551	0.059278	0.054988	0.0539902			15.2995
15.3076	0.053331	0.052667	0.075595	0.055525	0.05898	0.054983	0.0539923			15.3076
15.3158	0.053334	0.052669	0.074241	0.055499	0.058699	0.054979	0.0539911			15.3158
15.324	0.053336	0.052668	0.072965	0.055472	0.058435	0.054975	0.0539905			15.324
15.3322	0.053335	0.05267	0.071758	0.055447	0.058188	0.054966	0.0539916			15.3322
15.3404	0.053338	0.052674	0.07062	0.055426	0.057956	0.054962	0.0539882			15.3404
15.3486	0.053342	0.052674	0.069544	0.055406	0.05774	0.05496	0.0539853			15.3486
15.3568	0.053343	0.052674	0.068526	0.055383	0.057533	0.054961	0.0539831			15.3568
15.365	0.053342	0.052676	0.067566	0.055362	0.057335	0.054965	0.0539793			15.365
15.3732	0.053345	0.052678	0.066663	0.055341	0.05715	0.054965	0.0539775			15.3732
15.3813	0.053348	0.05268	0.065811	0.05532	0.056974	0.054962	0.0539755			15.3813
15.3895	0.05335	0.05268	0.065007	0.055299	0.056811	0.054965	0.0539766			15.3895
15.3977	0.05335	0.052679	0.064256	0.055279	0.056655	0.05497	0.0539777			15.3977
15.4059	0.053349	0.052682	0.063556	0.055261	0.056506	0.054978	0.0539742			15.4059
15.4141	0.053353	0.052683	0.062894	0.055242	0.05637	0.054989	0.0539682			15.4141
15.4223	0.053354	0.052682	0.062271	0.055226	0.05624	0.054996	0.0539638			15.4223
15.4305	0.053352	0.052682	0.061686	0.055211	0.05612	0.055009	0.0539623			15.4305
15.4387	0.053352	0.052682	0.061137	0.055198	0.056007	0.055027	0.0539588			15.4387
15.4469	0.053353	0.052682	0.060627	0.055189	0.0559	0.055046	0.0539529			15.4469
15.455	0.053352	0.052684	0.060151	0.055178	0.055798	0.055072	0.0539489			15.455
15.4632	0.053355	0.052686	0.0597	0.05517	0.055701	0.055098	0.0539469			15.4632
15.4714	0.053358	0.052688	0.059276	0.055161	0.055616	0.05513	0.0539465			15.4714
15.4796	0.05336	0.052687	0.058883	0.055146	0.055535	0.055168	0.0539476			15.4796
15.4878	0.053359	0.052686	0.058515	0.055136	0.055455	0.055211	0.0539496			15.4878
15.496	0.053357	0.052687	0.058168	0.055124	0.05538	0.05526	0.0539477			15.496
15.5042	0.053359	0.05269	0.057847	0.055112	0.055308	0.055316	0.0539427			15.5042
15.5124	0.053363	0.052692	0.057547	0.055106	0.055244	0.055063	0.0539363			15.5124
15.5206	0.053365	0.052691	0.057264	0.0551	0.055183	0.055063	0.0539296			15.5206
15.5288	0.053364	0.052694	0.057	0.055095	0.055124	0.055059	0.0539268			15.5288
15.5369	0.053368	0.052694	0.056754	0.055091	0.055068	0.05505	0.0539247			15.5369
15.5451	0.053368	0.052695	0.056519	0.055088	0.055015	0.055046	0.05392			15.5451
15.5533	0.053369	0.052698	0.056297	0.055086	0.054963	0.055044	0.0539159			15.5533
15.5615	0.053372	0.052696	0.056089	0.055087	0.054914	0.055037	0.0539171			15.5615
15.5697	0.05337	0.052699	0.055898	0.055086	0.054869	0.055033	0.0539153			15.5697
15.5779	0.053374	0.052702	0.055719	0.055083	0.054828	0.055031	0.0539098			15.5779
15.5861	0.053377	0.052702	0.055555	0.055081	0.054791	0.055027	0.0539088			15.5861
15.5943	0.053377	0.052705	0.055402	0.055082	0.054758	0.055024	0.0539051			15.5943
15.6025	0.053381	0.052706	0.055253	0.05508	0.054724	0.055027	0.0538975			15.6025
15.6107	0.053383	0.052705	0.055113	0.055074	0.054695	0.055036	0.0538932			15.6107
15.6189	0.053381	0.052706	0.054983	0.055075	0.054669	0.055035	0.0538915			15.6189
15.627	0.053383	0.052709	0.054863	0.055077	0.05464	0.055032	0.0538854			15.627
15.6352	0.053386	0.052711	0.054748	0.055075	0.054613	0.055035	0.0538763			15.6352
15.6434	0.053389	0.052715	0.054639	0.055072	0.054591	0.055036	0.0538693			15.6434
15.6516	0.053394	0.052718	0.054541	0.055071	0.054568	0.055037	0.0538647			15.6516
15.6598	0.053397	0.052719	0.054448	0.055072	0.054543	0.055036	0.0538606			15.6598
15.668	0.053399	0.052722	0.054361	0.055074	0.054522	0.055036	0.0538567			15.668
15.6762	0.053403	0.052723	0.054283	0.055073	0.054503	0.055039	0.0538529			15.6762
15.6844	0.053404	0.052726	0.05421	0.055068	0.054488	0.05504	0.0538494			15.6844
15.6926	0.053408	0.052733	0.054136	0.055066	0.054471	0.055037	0.0538466			15.6926
15.7007	0.053416	0.052737	0.054066	0.055064	0.054455	0.055034	0.0538456			15.7007
15.7089	0.053421	0.052742	0.054002	0.055056	0.054439	0.055032	0.0538471			15.7089
15.7171	0.053428	0.052751	0.053947	0.05505	0.054422	0.055031	0.0538453			15.7171
15.7253	0.053439	0.05276	0.053891	0.055048	0.054408	0.055031	0.0538414			15.7253
15.7335	0.05345	0.052768	0.053836	0.055038	0.054397	0.055031	0.0538371			15.7335
15.7417	0.05346	0.052774	0.053788	0.055027	0.054387	0.055029	0.0538298			15.7417
15.7499	0.053467	0.052782	0.053743	0.055018	0.054374	0.055023	0.0538236			15.7499
15.7581	0.053477	0.052794	0.053703	0.055009	0.054361	0.055021	0.0538191			15.7581
15.7663	0.053492	0.052806	0.053666	0.055	0.054353	0.055016	0.0538132			15.7663
15.7744	0.053507	0.05282	0.053629	0.054985	0.054347	0.055005	0.0538101			15.7744
15.7826	0.053525	0.052832	0.053595	0.054972	0.054342	0.055001	0.0538097			15.7826
15.7908	0.05354	0.052844	0.053561	0.054958	0.054337	0.054995	0.053805			15.7908
15.799	0.053555	0.052862	0.053525	0.05494	0.054333	0.054988	0.0538005			15.799
15.8072	0.053577	0.05288	0.053496	0.054924	0.054328	0.054983	0.0537996			15.8072
15.8154	0.0536	0.052898	0.053472	0.054907	0.054319	0.054979	0.0537955			15.8154
15.8236	0.053622	0.052918	0.05345	0.05489	0.054306	0.054975	0.0537922			15.8236
15.8318	0.053648	0.052945	0.053428	0.05487	0.054297	0.054966	0.0537929			15.8318
15.84	0.053681	0.052974	0.053404	0.05485	0.054291	0.054962	0.0537919			15.84
15.8482	0.053717	0.053002	0.053384	0.054826	0.054284	0.05496	0.0537861			15.8482
15.8564	0.053752	0.053032	0.053369	0.054806	0.054277	0.054961	0.053775			15.8564
15.8645	0.05379	0.053068	0.053346	0.054787	0.054274	0.054965	0.0537667			15.8645
15.8727	0.053835	0.053105	0.05332	0.054764	0.054273	0.054965	0.0537618			15.8727
15.8809	0.053881	0.05314	0.0533	0.054744	0.054271	0.054962	0.0537567			15.8809
15.8891	0.053925	0.053178	0.053284	0.054725	0.054269	0.054965	0.0537529			15.8891
15.8973	0.053972	0.053223	0.053268	0.054702	0.054268	0.05497	0.0537493			15.8973
15.9055	0.054029	0.053274	0.053251	0.054683	0.054269	0.054978	0.0537447			15.9055
15.9137	0.054092	0.05333	0.053236	0.054669	0.054268	0.054989	0.053741			15.9137
15.9219	0.054162	0.053386	0.053222	0.05465	0.054264	0.054996	0.0537376			15.9219
15.9301	0.054233	0.053449	0.05321	0.05463	0.054265	0.055009	0.0537329			15.9301
15.9383	0.054311	0.053515	0.053202	0.054612	0.054263	0.055027	0.0537293			15.9383
15.9464	0.054394	0.053584	0.053192	0.054592	0.054256	0.055046	0.0537294			15.9464
15.9546	0.05448	0.053661	0.053184	0.054571	0.054253	0.055072	0.0537297			15.9546
15.9628	0.054576	0.053746	0.053173	0.054551	0.054252	0.055098	0.0537232			15.9628
15.971	0.054682	0.053838	0.053159	0.054533	0.054251	0.05513	0.0537176			15.971
15.9792	0.054798	0.053938	0.05315	0.054515	0.054248	0.055168	0.053715			15.9792
15.9874	0.054923	0.054045	0.053143	0.054498	0.054242	0.055211	0.0537126			15.9874
15.9956	0.055056	0.054157	0.053134	0.054485	0.054238	0.05526	0.0537094			15.9956
16.0038	0.055196	0.054275	0.053126	0.054468	0.054234	0.055316	0.053706			16.0038
16.012	0.055344	0.054406	0.053118	0.054453	0.054233	0.055382	0.0537057			16.012
16.0202	0.055508	0.054549	0.053107	0.054438	0.054236	0.055452	0.0537029			16.0202
16.0283	0.055686	0.054703	0.0531	0.054425	0.054235	0.055527	0.0536966			16.0283
16.0365	0.055879	0.054866	0.053098	0.054416	0.054233	0.055611	0.0536936			16.0365
16.0447	0.056083	0.055039	0.053094	0.054409	0.054232	0.055696	0.0536956			16.0447
16.0529	0.056299	0.055226	0.053089	0.0544	0.054231	0.055791	0.0536973			16.0529
16.0611	0.056533	0.055428	0.053084	0.054389	0.054234	0.055898	0.0536965			16.0611
16.0693	0.056785	0.055641	0.053078	0.05438	0.054234	0.05601	0.0536959			16.0693
16.0775	0.057051	0.055866	0.053072	0.05437	0.054235	0.056128	0.0536946			16.0775
16.0857	0.057332	0.056112	0.053068	0.054361	0.054238	0.056255	0.0536919			16.0857
16.0938	0.05764	0.056372	0.053064	0.054353	0.054239	0.056391	0.0536882			16.0938
16.102	0.057965	0.056647	0.053057	0.054347	0.054238	0.056534	0.0536814			16.102
16.1102	0.058309	0.056942	0.053052	0.054341	0.054241	0.056685	0.0536775			16.1102
16.1184	0.058677	0.057248	0.053047	0.054332	0.054245	0.056848	0.0536772			16.1184
16.1266	0.05906	0.057567	0.053038	0.054326	0.054246	0.057021	0.0536751			16.1266
16.1348	0.059459	0.057903	0.053033	0.054316	0.054247	0.0572	0.0536736			16.1348
16.143	0.059879	0.058256	0.053028	0.054305	0.054244	0.057388	0.0536717			16.143
16.1512	0.06032	0.058623	0.053021	0.054294	0.054243	0.057586	0.0536706			16.1512
16.1594	0.060779	0.059002	0.053019	0.054283	0.054247	0.057789	0.0536684			16.1594
16.1676	0.061252	0.05939	0.053017	0.054278	0.054247	0.057991	0.053666			16.1676
16.1758	0.061738	0.05979	0.053013	0.054271	0.054243	0.058201	0.053662			16.1758
16.1839	0.062238	0.060202	0.053011	0.054268	0.054241	0.058416	0.0536575			16.1839
16.1921	0.062752	0.060619	0.05301	0.054268	0.054242	0.058626	0.0536562			16.1921
16.2003	0.063274	0.061046	0.053009	0.054263	0.054245	0.058838	0.0536518			16.2003
16.2085	0.063808	0.061473	0.053008	0.054258	0.054248	0.059054	0.0536489			16.2085
16.2167	0.064341	0.061898	0.053002	0.054253	0.054253	0.059265	0.0536492			16.2167		24687.2
16.2249	0.064872	0.062322	0.052995	0.054247	0.054255	0.059473	0.0536501			16.2249		25872.3
16.2331	0.065402	0.06274	0.052995	0.05424	0.054252	0.059678	0.0536491			16.2331		25990.2
16.2413	0.065925	0.063149	0.052995	0.054232	0.054256	0.059872	0.0536484			16.2413		25098.8
16.2495	0.066436	0.063548	0.052993	0.054224	0.054259	0.060058	0.0536489			16.2495		25890.4
16.2577	0.066935	0.063941	0.052993	0.054216	0.05426	0.060233	0.0536497			16.2577		25789.4
16.2658	0.067426	0.064316	0.052995	0.05421	0.05426	0.060398	0.0536489			16.2658		25923.4
16.274	0.067895	0.064669	0.052992	0.054204	0.054258	0.060553	0.053647			16.274	19865.2	25649
16.2822	0.068336	0.065002	0.052989	0.054199	0.054258	0.060691	0.0536452			16.2822	20308.4	24902.3
16.2904	0.068753	0.065306	0.052988	0.054193	0.054258	0.060813	0.0536404			16.2904	20700.4	24980.4
16.2986	0.069133	0.065586	0.052984	0.054183	0.054261	0.06092	0.0536371			16.2986	21062.4	24802.6
16.3068	0.069482	0.065834	0.052977	0.054174	0.054266	0.061015	0.0536331			16.3068	21442.3	24532.2
16.315	0.069792	0.066051	0.052968	0.054163	0.054272	0.061087	0.0536259			16.315	21747	24848.5
16.3232	0.070064	0.066239	0.052962	0.054147	0.054275	0.061139	0.0536212			16.3232	21966.8	24904.8
16.3314	0.070299	0.066392	0.052961	0.054134	0.054274	0.061176	0.053621			16.3314	22094.2	24413
16.3395	0.07049	0.06651	0.052964	0.054122	0.054272	0.06119	0.053622			16.3395	22187	24757.7
16.3477	0.070637	0.066589	0.052965	0.054112	0.054272	0.061186	0.0536233			16.3477	22314.7	24127.2
16.3559	0.070736	0.066633	0.052962	0.054101	0.054271	0.061164	0.0536263			16.3559	22474.7	24708.2
[truncated: 2,264 more rows]

## Sheet: FP
	Ub (uM)	FP (mP)			K48 Ub2 (uM)	FP (mP)			K6/K48 Ub3 (uM)	FP (mP)
	200	159	166		150	159	158		200	208	225
	100	173	171		75	159	158		100	196	198
	50	193	172		37.5	153	168		50	192	171
	25	203	200		18.75	168	179		25	189	180
	12.5	201	210		9.375	169	162		12.5	186	210
	6.25	236	229		4.6875	189	195		6.25	209	197
	3.125	259	259		2.34375	202	209		3.125	228	208
	1.5625	266	251		1.17188	225	225		1.5625	240	235
	0.78125	279	280		0.585938	260	279		0.78125	268	279
	0.390625	284	276		0.292969	268	268		0.390625	280	282
	0.195312	278	291		0.146484	279	275		0.195312	284	280
	0.0976562	278	288		0.0732422	288	278		0.0976562	278	284
	0.0488281	284	284		0.0366211	266	282		0.0488281	279	288

## Sheet: Ub-AMC
Time (s)	UCH37•RPN13	F117A	F121A	I216E	L181A
0	0	0	0	0	0
10	10.8	15.4	13	0	11.2
20	18.9	25.2	16.9	0	14
30	20.25	30.8	22.1	2	22.4
40	28.35	40.6	28.6	1	28
50	31.05	44.8	31.2	3	33.6
60	37.8	49	35.1	4	36.4
70	40.5	47.6	39	6	36.4
80	39.15	50.4	41.6	6	39.2
90	41.85	53.2	45.5	5	47.6
100	47.25	51.8	49.4	7	50.4
110	47.25	56	50.7	7	50.4
120	45.9	54.6	50.7	9	44.8
130	44.55	54.6	52	8	50.4
140	48.6	54.6	53.3	9	47.6
150	51.3	57.4	52	9	53.2
160	52.65	57.4	54.6	11	47.6
170	51.3	53.2	54.6	11	53.2
180	52.65	57.4	58.5	11	53.2
190	52.65	58.8	57.2	12	53.2
200	52.65	50.4	57.2	14	50.4
210	49.95	60.2	59.8	14	56
220	52.65	54.6	59.8	15	53.2
230	48.6	54.6	57.2	15	50.4
240	56.7	56	59.8	15	50.4
250	48.6	53.2	62.4	16	50.4
260	49.95	53.2	58.5	17	56
270	51.3	53.2	59.8	15	53.2
280	52.65	57.4	58.5	18	53.2
290	51.3	56	61.1	16	44.8
300	49.95	56	59.8	18	53.2
310	54	54.6	58.5	18	50.4
320	54	56	58.5	18	53.2
330	49.95	56	59.8	20	47.6
340	55.35	54.6	55.9	21	44.8
350	51.3	53.2	59.8	20	56
360	51.3	57.4	58.5	21	53.2
370	52.65	58.8	57.2	21	53.2
380	52.65	53.2	58.5	22	47.6
390	55.35	56	58.5	22	47.6
400	55.35	54.6	59.8	21	53.2
410	52.65	56	58.5	21	47.6
420	55.35	56	58.5	23	50.4
430	51.3	54.6	58.5	22	47.6
440	51.3	54.6	55.9	24	50.4
450	54	56	58.5	25	47.6
460	52.65	56	58.5	22	53.2
470	52.65	54.6	58.5	26	50.4
480	54	56	58.5	23	47.6
490	52.65	57.4	55.9	26	44.8
500	51.3	57.4	59.8	26	50.4
510	52.65	51.8	57.2	27	47.6
520	55.35	53.2	57.2	28	47.6
530	56.7	56	53.3	26	53.2
540	54	57.4	53.3	25	47.6
550	55.35	54.6	58.5	26	47.6
560	54	53.2	58.5	28	53.2
570	55.35	58.8	59.8	27	50.4
580	51.3	56	55.9	30	42
590	55.35	56	54.6	27	53.2
600	51.3	57.4	57.2	29	53.2
610	55.35	53.2	57.2	29	50.4
620	52.65	54.6	58.5	27	47.6
630	54	53.2	57.2	31	50.4
640	54	57.4	55.9	30	44.8
650	51.3	54.6	53.3	31	50.4
660	52.65	54.6	57.2	29	50.4
670	52.65	56	55.9	30	50.4
680	51.3	56	52	31	42
690	51.3	57.4	57.2	31	47.6
700	54	57.4	55.9	32	47.6
710	51.3	58.8	52	30	50.4
720	54	51.8	55.9	31	44.8
730	48.6	54.6	55.9	33	47.6
740	54	53.2	52	30	42
750	55.35	57.4	55.9	30	50.4
760	52.65	53.2	58.5	32	47.6
770	54	51.8	55.9	32	44.8
780	54	56	57.2	32	44.8
790	52.65	54.6	53.3	34	47.6
800	55.35	54.6	54.6	32	53.2
810	52.65	54.6	53.3	33	47.6
820	54	54.6	58.5	32	53.2
830	48.6	53.2	52	33	47.6
840	58.05	53.2	52	32	50.4
850	52.65	53.2	55.9	34	50.4
860	51.3	54.6	54.6	32	47.6
870	49.95	54.6	55.9	34	53.2
880	55.35	53.2	52	33	47.6
890	49.95	50.4	54.6	35	44.8
900	52.65	56	50.7	32	42
910	54	53.2	53.3	33	50.4
920	55.35	54.6	52	30	53.2
930	51.3	57.4	53.3	36	47.6
940	55.35	56	52	36	47.6
950	51.3	53.2	50.7	35	53.2
960	54	51.8	52	34	44.8
970	51.3	57.4	53.3	35	44.8
980	55.35	53.2	54.6	34	44.8
990	52.65	58.8	50.7	34	50.4
1000	54	53.2	50.7	36	47.6
1010	55.35	54.6	52	36	44.8
1020	54	54.6	52	33	47.6
1030	51.3	54.6	54.6	36	42
1040	51.3	50.4	50.7	37	50.4
1050	54	54.6	49.4	35	44.8
1060	52.65	53.2	49.4	35	50.4
1070	54	53.2	50.7	36	53.2
1080	51.3	51.8	52	36	50.4
1090	54	53.2	52	38	50.4
1100	55.35	53.2	50.7	36	47.6
1110	55.35	51.8	52	37	42
1120	55.35	53.2	50.7	37	44.8
1130	55.35	54.6	50.7	37	47.6
1140	51.3	53.2	52	37	47.6
1150	55.35	51.8	52	38	47.6
1160	54	56	49.4	38	50.4
1170	55.35	51.8	50.7	38	50.4
1180	54	53.2	48.1	37	47.6
1190	52.65	51.8	50.7	39	47.6
1200	52.65	53.2	50.7	38	42
1210	54	54.6	49.4	39	44.8
1220	54	57.4	48.1	38	44.8
1230	52.65	53.2	50.7	38	47.6
1240	55.35	51.8	49.4	40	47.6
1250	58.05	51.8	49.4	37	42
1260	55.35	54.6	49.4	39	47.6
1270	55.35	51.8	49.4	39	44.8
1280	52.65	50.4	49.4	41	44.8
1290	54	51.8	50.7	38	47.6
1300	56.7	50.4	49.4	39	44.8
1310	55.35	51.8	49.4	40	50.4
1320	55.35	54.6	50.7	40	42
1330	56.7	53.2	50.7	37	47.6
1340	51.3	51.8	48.1	41	44.8
1350	55.35	51.8	49.4	38	42
1360	55.35	51.8	52	41	44.8
1370	56.7	56	49.4	40	50.4
1380	51.3	53.2	50.7	39	47.6
1390	54	51.8	49.4	40	44.8
1400	54	51.8	49.4	40	42
1410	55.35	54.6	48.1	40	47.6
1420	54	53.2	48.1	40	47.6
1430	55.35	50.4	48.1	40	44.8
1440	55.35	58.8	46.8	42	42
1450	52.65	56	52	40	47.6
1460	52.65	53.2	48.1	39	47.6
1470	51.3	50.4	52	41	47.6
1480	49.95	50.4	49.4	39	47.6
1490	54	53.2	52	42	47.6
1500	52.65	54.6	52	42	44.8
1510	52.65	54.6	53.3	41	53.2
1520	56.7	54.6	52	41	42
1530	56.7	54.6	53.3	42	47.6
1540	54	54.6	46.8	41	42
1550	51.3	54.6	46.8	43	47.6
1560	55.35	56	48.1	43	47.6
1570	56.7	56	50.7	42	47.6
1580	54	51.8	48.1	42	47.6
1590	58.05	54.6	52	42	44.8
1600	56.7	53.2	49.4	40	47.6
1610	54	51.8	48.1	39	47.6
1620	52.65	50.4	50.7	42	44.8
1630	51.3	53.2	49.4	43	47.6
1640	55.35	53.2	45.5	41	50.4
1650	54	51.8	49.4	43	50.4
1660	51.3	51.8	49.4	43	44.8
1670	52.65	47.6	48.1	43	42
1680	55.35	51.8	49.4	42	39.2
1690	51.3	51.8	48.1	40	50.4
1700	52.65	53.2	52	42	44.8
1710	55.35	53.2	53.3	42	47.6
1720	51.3	56	52	42	44.8
1730	52.65	53.2	49.4	43	44.8
1740	51.3	53.2	50.7	43	42
1750	51.3	56	49.4	45	42
1760	54	54.6	49.4	41	44.8
1770	54	53.2	46.8	42	50.4
1780	56.7	50.4	50.7	43	53.2
1790	52.65	50.4	52	44	47.6
1800	49.95	49	48.1	43	50.4

## Sheet: Debranch kinetics
	K6/K48 Ub3 (uM)	UCH37•RPN13			UCH37F117A•RPN13			UCH37F121A•RPN13			UCH37I216E•RPN13			UCH37L181A•RPN13
	200	8	7.7	8.8	1.8	1.9	1.6	0.39	0.43	0.42	6.9	7.2	7.8	2	2.3	2
	100	-	-	7.3	1.1	1.3	1.1	0.26	0.24	0.33	5.7	5.7	6.2	1.8	1.4	1.5
	50	7.3	6.5	5.2	0.54	0.62	0.65	0.11	0.097	0.24	4.6	5	5.3	1.3	0.8	1
	30	5.7	4.7	3.6	0.36	0.35	0.55	0.069	0.062	0.19	3.4	3.1	4.4	0.84	0.55	0.68
	20	3.8	3.9	2.9	0.17	0.2	0.37	0.026	0.033	0.14	2.8	2.4	3.8	0.55	0.42	0.45
	10	2.1	2	2	0.12	0.1	0.23	0.019	0.022	0.043	2.1	1.8	1.6	0.39	0.19	0.035
	5	0.96	0.92	-	-	-	-	-	-	-	-	-	-	-	-	-
	Initial rate in uM/min

## Sheet: Emetine Chase AHA Pulse Chase
	Percent GFPu degradation
Time (min)	WT GFPu			UCH37KO GFPu
0	100	100	100	100	100	100
30	74.3902	75.1231	76.5281	89.0212	85.8586	90.7792
60	67.0732	67.4877	66.9927	78.0423	73.3586	75.4545
120	62.9268	63.3005	62.8362	73.545	68.5606	73.8961
Time (min)	F117A rescue			I216E rescue
0	100	100	100	100	100	100
30	98.6003	96.2825	97.5872	85.6658	78.4404	82.7875
60	91.6796	85.1301	88.4579	79.3893	71.0245	75.5894
120	85.07	88.5502	86.8679	68.2782	64.4495	66.358
Chase time (h)	F117A		I216E
0	1	1	1	1
1	1.01483	0.91314	0.817896	0.694332
2	0.887242	0.870363	0.719459	0.643787
3	0.97834	0.858071	0.693789	0.608174
4	1.07093	0.841741	0.600418	0.536872
POLR2D	WT HEK293					UCH37KO HEK293							POLR2D	UCH37 KO rescued by UCH37 I216E					UCH37 KO rescued by UCH37 F117A
	Densitometry		Pecent degraded			Densitometry		Pecent degraded						Densitometry		Pecent degraded			Densitometry		Pecent degraded
Time (h)	BR1	BR2	BR1	BR2		BR1	BR2	BR1	BR2				Time (h)	BR1	BR2	BR1	BR2		BR1	BR2	BR1	BR2
0	1140	3180	100	100	0	1640	4010	100	100				0	704	1400	100	100	0	1120	1280	100	100
1	795	2480	69.7368	77.9874	1	1250	3230	76.2195	80.5486				1	521	523	74.0057	37.3571	1	900	1120	80.3571	87.5
2	703	2200	61.6667	69.1824	2	1170	2710	71.3415	67.581				2	363	321	51.5625	22.9286	2	790	788	70.5357	61.5625
4	361	1350	31.6667	42.4528	4	1130	2970	68.9024	74.0648				4	195	174	27.6989	12.4286	4	612	539	54.6429	42.1094
8	111	430	9.73684	13.522	8	600	1350	36.5854	33.6658				8	72.4	146	10.2841	10.4286	8	531	356	47.4107	27.8125
Mfn2	WT HEK293					UCH37KO HEK293							Mfn2	UCH37 KO rescued by UCH37 I216E					UCH37 KO rescued by UCH37 F117A
	Densitometry		Pecent degraded			Densitometry		Pecent degraded						Densitometry		Pecent degraded			Densitometry		Pecent degraded
Time (h)	BR1	BR2	BR1	BR2		BR1	BR2	BR1	BR2				Time (h)	BR1	BR2	BR1	BR2		BR1	BR2	BR1	BR2
0	68.5	213	100	100	0	119	348	100	100				0	48.4	37.9	100	100	0	98.9	69.1	100	100
1	48.7	160	71.0949	75.1174	1	81.4	237	68.4034	68.1034				1	38.1	29.3	78.719	77.3087	1	73.9	64.1	74.7219	92.7641
2	39.8	124	58.1022	58.216	2	62.2	177	52.2689	50.8621				2	31.1	13.3	64.2562	35.0923	2	65.6	54.8	66.3296	79.3054
4	19.2	68.8	28.0292	32.3005	4	80.8	178	67.8992	51.1494				4	13.2	8.8	27.2727	23.219	4	46.8	35.5	47.3205	51.3748
8	2.13	13.7	3.10949	6.43192	8	47.8	106	40.1681	30.4598				8	9.93	4.78	20.5165	12.6121	8	30	21.4	30.3337	30.9696

## Sheet: Ptsm Ub-AMC
time (s)	WT	WT rep	C88A rep	I216E rep	F117A rep	F121A rep
0	0	0	0	0	0	0
5	3.125	4.25532	5	0.833333	3	2.5
10	2.08333	7.44681	6	1.66667	5	2.5
15	5.20833	5.31915	4	2.5	6	5.83333
20	5.20833	8.51064	2	2.5	11	7.5
25	8.33333	12.766	6	2.5	10	9.16667
30	9.375	11.7021	4	3.33333	13	13.3333
35	13.5417	13.8298	4	3.33333	15	15
40	12.5	17.0213	4	5	17	18.3333
45	16.6667	19.1489	5	4.16667	19	19.1667
50	16.6667	24.4681	4	4.16667	24	20
55	15.625	22.3404	2	6.66667	22	22.5
60	23.9583	23.4043	5	5.83333	25	24.1667
65	23.9583	28.7234	4	5.83333	26	27.5
70	25	29.7872	4	5	29	28.3333
75	26.0417	26.5957	4	6.66667	30	29.1667
80	25	29.7872	2	5.83333	27	29.1667
85	27.0833	29.7872	3	8.33333	33	32.5
90	27.0833	30.8511	5	7.5	32	32.5
95	29.1667	30.8511	4	8.33333	32	35
100	28.125	30.8511	3	9.16667	35	35
105	28.125	34.0425	3	8.33333	36	34.1667
110	30.2083	34.0425	5	10	38	36.6667
115	30.2083	34.0425	4	10	38	39.1667
120	28.125	35.1064	5	9.16667	38	36.6667
125	30.2083	39.3617	3	10	38	38.3333
130	33.3333	35.1064	3	11.6667	38	40.8333
135	32.2917	37.234	3	11.6667	37	38.3333
140	32.2917	36.1702	3	10.8333	39	39.1667
145	33.3333	37.234	2	13.3333	40	40
150	32.2917	39.3617	3	13.3333	41	40.8333
155	34.375	39.3617	2	15	40	40.8333
160	33.3333	39.3617	3	14.1667	41	40.8333
165	33.3333	39.3617	5	14.1667	41	41.6667
170	34.375	40.4255	1	15	41	41.6667
175	34.375	36.1702	1	14.1667	42	43.3333
180	36.4583	41.4894	4	14.1667	41	40.8333
185	33.3333	40.4255	3	15.8333	41	43.3333
190	36.4583	39.3617	3	15	41	43.3333
195	36.4583	39.3617	2	15.8333	41	41.6667
200	35.4167	40.4255	4	17.5	40	43.3333
205	37.5	37.234	5	16.6667	39	43.3333
210	35.4167	42.5532	3	15	39	45
215	35.4167	40.4255	2	16.6667	41	41.6667
220	37.5	40.4255	4	17.5	42	42.5
225	37.5	40.4255	3	17.5	43	44.1667
230	38.5417	41.4894	3	16.6667	41	44.1667
235	36.4583	43.617	3	19.1667	40	45
240	36.4583	41.4894	1	19.1667	43	42.5
245	37.5	40.4255	3	18.3333	41	42.5
250	37.5	39.3617	3	17.5	43	44.1667
255	39.5833	41.4894	1	20	40	43.3333
260	37.5	39.3617	0	21.6667	42	43.3333
265	41.6667	39.3617	2	21.6667	41	42.5
270	38.5417	40.4255	3	20	41	43.3333
275	37.5	40.4255	3	21.6667	41	44.1667
280	38.5417	42.5532	3	21.6667	42	44.1667
285	37.5	42.5532	2	21.6667	41	43.3333
290	39.5833	38.2979	1	21.6667	41	46.6667
295	38.5417	43.617	2	20.8333	42	42.5
300	38.5417	42.5532	4	21.6667	43	43.3333
305	39.5833	41.4894	3	23.3333	43	42.5
310	38.5417	42.5532	2	23.3333	44	44.1667
315	39.5833	40.4255	3	23.3333	43	45
320	39.5833	42.5532	3	23.3333	41	42.5
325	40.625	41.4894	2	23.3333	43	44.1667
330	39.5833	40.4255	1	24.1667	41	42.5
335	40.625	43.617	3	24.1667	43	45
340	37.5	40.4255	1	23.3333	42	44.1667
345	40.625	42.5532	2	24.1667	43	45.8333
350	40.625	41.4894	2	25	41	45
355	43.75	40.4255	1	25.8333	41	43.3333
360	39.5833	40.4255	2	24.1667	41	44.1667
365	39.5833	43.617	2	25.8333	42	41.6667
370	40.625	40.4255	4	25	44	44.1667
375	42.7083	40.4255	4	26.6667	40	46.6667
380	40.625	43.617	2	25.8333	40	45
385	42.7083	43.617	3	27.5	40	44.1667
390	41.6667	41.4894	3	27.5	43	43.3333
395	41.6667	43.617	3	25	42	43.3333
400	40.625	41.4894	0	27.5	42	44.1667
405	40.625	44.6808	1	27.5	42	44.1667
410	39.5833	40.4255	3	30	42	45
415	42.7083	42.5532	3	28.3333	41	44.1667
420	41.6667	42.5532	1	30.8333	41	41.6667
425	41.6667	42.5532	1	28.3333	43	43.3333
430	41.6667	42.5532	0	30.8333	42	42.5
435	43.75	42.5532	2	30	42	44.1667
440	40.625	43.617	3	29.1667	43	45
445	41.6667	42.5532	3	32.5	43	43.3333
450	43.75	42.5532	1	28.3333	41	43.3333
455	43.75	41.4894	2	31.6667	43	44.1667
460	41.6667	42.5532	2	30	42	45
465	41.6667	42.5532	2	30	42	42.5
470	42.7083	42.5532	4	30.8333	44	43.3333
475	42.7083	42.5532	2	31.6667	44	45
480	43.75	42.5532	3	30	41	43.3333
485	42.7083	43.617	1	30.8333	41	44.1667
490	40.625	42.5532	3	32.5	41	45
495	40.625	43.617	5	30.8333	45	44.1667
500	42.7083	41.4894	1	32.5	44	45
505	42.7083	43.617	2	34.1667	41	45
510	41.6667	42.5532	4	32.5	44	45.8333
515	41.6667	42.5532	2	34.1667	43	45
520	43.75	44.6808	1	35	40	44.1667
525	42.7083	42.5532	1	34.1667	42	45.8333
530	42.7083	43.617	1	32.5	43	45.8333
535	43.75	44.6808	2	34.1667	43	44.1667
540	42.7083	44.6808	1	34.1667	43	43.3333
545	44.7917	43.617	2	35.8333	42	44.1667
550	43.75	44.6808	2	35	44	44.1667
555	42.7083	41.4894	2	35	44	43.3333
560	43.75	44.6808	2	35	44	45
565	44.7917	43.617	4	34.1667	45	44.1667
570	43.75	43.617	1	36.6667	42	42.5
575	43.75	43.617	3	35.8333	43	43.3333
580	44.7917	44.6808	4	35.8333	46	43.3333
585	42.7083	43.617	3	34.1667	43	45
590	41.6667	42.5532	2	35	43	43.3333
595	44.7917	42.5532	1	36.6667	44	44.1667
600	43.75	43.617	3	34.1667	43	45
605	44.7917	44.6808	2	36.6667	44	44.1667
610	40.625	42.5532	2	35.8333	43	45
615	41.6667	45.7447	4	35.8333	44	44.1667
620	43.75	43.617	2	37.5	44	45.8333
625	44.7917	42.5532	3	35.8333	44	43.3333
630	43.75	44.6808	0	37.5	43	43.3333
635	43.75	43.617	2	37.5	43	44.1667
640	46.875	46.8085	3	36.6667	45	45.8333
645	42.7083	43.617	0	37.5	43	43.3333
650	43.75	43.617	1	37.5	45	47.5
655	42.7083	43.617	1	37.5	43	45.8333
660	43.75	45.7447	2	37.5	44	46.6667
665	44.7917	42.5532	2	36.6667	45	46.6667
670	45.8333	44.6808	1	35.8333	45	45
675	44.7917	44.6808	1	40	44	42.5
680	47.9167	45.7447	3	37.5	43	44.1667
685	44.7917	45.7447	3	37.5	45	46.6667
690	45.8333	45.7447	2	39.1667	44	45.8333
695	44.7917	43.617	0	37.5	45	43.3333
700	45.8333	45.7447	2	38.3333	45	46.6667
705	45.8333	42.5532	2	39.1667	45	45
710	46.875	45.7447	1	37.5	42	45.8333
715	46.875	43.617	3	40	43	43.3333
720	44.7917	42.5532	2	38.3333	45	45
725	45.8333	41.4894	0	39.1667	46	45
730	43.75	42.5532	1	38.3333	42	47.5
735	44.7917	43.617	2	40	44	45.8333
740	44.7917	46.8085	2	40	45	45
745	45.8333	44.6808	3	39.1667	45	44.1667
750	43.75	45.7447	3	41.6667	44	43.3333
755	45.8333	42.5532	1	39.1667	46	45
760	44.7917	45.7447	3	41.6667	45	45
765	44.7917	41.4894	3	40.8333	45	43.3333
770	44.7917	43.617	2	40.8333	43	43.3333
775	45.8333	45.7447	1	40.8333	45	46.6667
780	43.75	44.6808	2	40.8333	45	45
785	43.75	43.617	3	41.6667	44	45.8333
790	46.875	43.617	0	40.8333	44	44.1667
795	47.9167	44.6808	3	40.8333	46	45
800	43.75	46.8085	1	40.8333	44	45
805	43.75	42.5532	0	39.1667	45	45.8333
810	45.8333	44.6808	3	42.5	45	45.8333
815	44.7917	42.5532	1	39.1667	46	44.1667
820	44.7917	40.4255	2	42.5	45	45
825	44.7917	45.7447	2	40.8333	45	48.3333
830	45.8333	47.8723	2	41.6667	44	45
835	44.7917	44.6808	1	38.3333	46	44.1667
840	42.7083	43.617	1	40	46	45.8333
845	45.8333	44.6808	1	42.5	45	44.1667
850	44.7917	47.8723	3	42.5	44	47.5
855	46.875	44.6808	2	40.8333	47	45.8333
860	46.875	45.7447	1	41.6667	44	44.1667
865	46.875	45.7447	3	41.6667	44	45.8333
870	46.875	48.9362	2	40	43	45.8333
875	44.7917	46.8085	2	41.6667	46	47.5
880	46.875	44.6808	1	43.3333	48	45.8333
885	45.8333	46.8085	0	42.5	45	45.8333
890	45.8333	46.8085	1	42.5	45	43.3333
895	44.7917	44.6808	0	44.1667	46	45.8333
900	43.75	44.6808	1	43.3333	43	45.8333
905	46.875	44.6808	1	43.3333	46	45.8333
910	45.8333	44.6808	2	41.6667	45	46.6667
915	46.875	44.6808	2	42.5	44	45.8333
920	44.7917	45.7447	1	41.6667	44	45.8333
925	45.8333	44.6808	2	43.3333	48	45.8333
930	48.9583	45.7447	1	44.1667	44	45.8333
935	46.875	45.7447	0	42.5	43	46.6667
940	48.9583	46.8085	1	43.3333	46	45.8333
945	46.875	44.6808	0	42.5	45	46.6667
950	44.7917	43.617	0	44.1667	45	45.8333
955	47.9167	44.6808	2	41.6667	47	45
960	45.8333	43.617	3	44.1667	45	45
965	44.7917	44.6808	1	42.5	44	45.8333
970	43.75	47.8723	1	44.1667	45	44.1667
975	47.9167	47.8723	1	44.1667	47	45
980	47.9167	45.7447	3	44.1667	47	45
985	45.8333	45.7447	3	43.3333	48	43.3333
990	46.875	44.6808	2	45	45	45.8333
995	46.875	45.7447	3	43.3333	45	46.6667
1000	46.875	45.7447	1	43.3333	45	43.3333
1005	44.7917	47.8723	1	42.5	46	44.1667
1010	46.875	47.8723	2	42.5	46	45.8333
1015	45.8333	48.9362	2	43.3333	48	45
1020	46.875	48.9362	2	42.5	45	47.5
1025	47.9167	48.9362	2	44.1667	44	45
1030	47.9167	44.6808	1	44.1667	46	44.1667
1035	46.875	45.7447	1	45.8333	46	45.8333
1040	46.875	48.9362	0	44.1667	45	45
1045	47.9167	45.7447	-1	44.1667	46	46.6667
1050	47.9167	47.8723	1	45	46	45
1055	46.875	45.7447	2	44.1667	47	46.6667
1060	47.9167	47.8723	0	44.1667	45	46.6667
1065	45.8333	46.8085	1	45.8333	46	46.6667
1070	47.9167	51.0638	3	45.8333	46	48.3333
1075	46.875	44.6808	-1	43.3333	48	45.8333
1080	46.875	45.7447	2	44.1667	47	45
1085	46.875	45.7447	1	44.1667	46	46.6667
1090	46.875	44.6808	2	44.1667	45	45
1095	45.8333	45.7447	1	44.1667	48	47.5
1100	47.9167	46.8085	0	43.3333	45	45.8333
1105	47.9167	45.7447	0	42.5	45	44.1667
1110	45.8333	46.8085	0	44.1667	48	45.8333
1115	47.9167	44.6808	1	44.1667	47	45.8333
1120	45.8333	46.8085	0	45	47	45
1125	48.9583	47.8723	0	45	47	45.8333
1130	46.875	48.9362	0	45	46	47.5
1135	47.9167	47.8723	0	45.8333	45	47.5
1140	46.875	45.7447	1	45	48	45.8333
1145	47.9167	47.8723	1	44.1667	47	45
1150	46.875	45.7447	2	47.5	48	46.6667
1155	47.9167	47.8723	1	45	46	45.8333
1160	48.9583	47.8723	0	45	45	46.6667
1165	47.9167	47.8723	2	45.8333	46	44.1667
1170	47.9167	46.8085	0	45.8333	46	45.8333
1175	47.9167	47.8723	1	45.8333	45	45.8333
1180	46.875	44.6808	1	46.6667	50	45.8333
1185	47.9167	47.8723	2	45.8333	45	45.8333
1190	48.9583	46.8085	0	45	48	46.6667
1195	46.875	46.8085	2	45	46	44.1667
1200	47.9167	44.6808	0	48.3333	48	45.8333
1205	46.875	47.8723	1	46.6667	45	46.6667
1210	48.9583	44.6808	2	45.8333	48	46.6667
1215	47.9167	46.8085	0	45	46	45.8333
1220	46.875	46.8085	0	45	48	46.6667
1225	45.8333	46.8085	0	45.8333	50	46.6667
1230	46.875	45.7447	2	45.8333	46	47.5
1235	47.9167	45.7447	1	47.5	47	46.6667
1240	46.875	46.8085	1	45	46	45
1245	46.875	44.6808	0	45.8333	46	46.6667
1250	48.9583	47.8723	1	46.6667	46	45
1255	48.9583	46.8085	1	47.5	49	47.5
1260	50	48.9362	2	45	46	45.8333
1265	48.9583	46.8085	5	46.6667	45	46.6667
1270	46.875	43.617	1	45.8333	48	44.1667
1275	47.9167	47.8723	1	45.8333	49	45.8333
1280	45.8333	44.6808	-1	47.5	46	45.8333
1285	47.9167	46.8085	0	45	45	48.3333
1290	48.9583	47.8723	0	46.6667	48	46.6667
1295	48.9583	47.8723	1	49.1667	47	45.8333
1300	46.875	50	1	45.8333	48	45.8333
1305	46.875	47.8723	1	47.5	48	47.5
1310	47.9167	47.8723	2	46.6667	47	46.6667
1315	50	48.9362	2	48.3333	46	44.1667
1320	47.9167	48.9362	1	46.6667	47	46.6667
1325	47.9167	46.8085	0	48.3333	50	45.8333
1330	47.9167	50	1	45	46	45.8333
1335	47.9167	47.8723	3	46.6667	47	48.3333
1340	47.9167	47.8723	2	46.6667	45	45
1345	48.9583	48.9362	2	45.8333	48	47.5
1350	50	48.9362	-1	46.6667	47	47.5
1355	48.9583	47.8723	0	46.6667	49	46.6667
1360	47.9167	47.8723	2	45.8333	45	45.8333
1365	48.9583	46.8085	1	48.3333	48	49.1667
1370	45.8333	47.8723	1	45	49	47.5
1375	46.875	45.7447	0	45.8333	48	45.8333
1380	46.875	45.7447	0	49.1667	47	45.8333
1385	48.9583	44.6808	1	48.3333	48	45.8333
1390	47.9167	47.8723	0	47.5	47	47.5
1395	47.9167	47.8723	1	46.6667	48	46.6667
1400	48.9583	47.8723	1	47.5	47	46.6667
1405	47.9167	45.7447	0	49.1667	47	46.6667
1410	47.9167	45.7447	1	46.6667	48	47.5
1415	47.9167	47.8723	0	46.6667	48	47.5
1420	48.9583	46.8085	1	48.3333	48	45.8333
1425	47.9167	47.8723	0	48.3333	49	48.3333
1430	47.9167	47.8723	1	47.5	48	49.1667
1435	45.8333	47.8723	-1	48.3333	46	46.6667
1440	46.875	46.8085	1	48.3333	48	46.6667
1445	50	47.8723	1	46.6667	49	48.3333
1450	46.875	46.8085	0	48.3333	47	46.6667
1455	46.875	46.8085	0	47.5	46	47.5
1460	50	45.7447	0	47.5	49	46.6667
1465	47.9167	47.8723	3	48.3333	48	47.5
1470	48.9583	48.9362	-1	48.3333	48	46.6667
1475	47.9167	47.8723	2	48.3333	48	47.5
1480	46.875	50	1	48.3333	48	45.8333
1485	47.9167	46.8085	1	45.8333	47	47.5
1490	46.875	48.9362	2	47.5	48	49.1667
1495	47.9167	46.8085	1	50	45	47.5
1500	46.875	47.8723	-2	47.5	48	45.8333
1505	51.0417	46.8085	1	50	48	47.5
1510	50	46.8085	0	46.6667	47	45.8333
1515	50	51.0638	0	47.5	47	47.5
1520	48.9583	44.6808	1	50	49	48.3333
1525	46.875	48.9362	2	50	49	45
1530	48.9583	47.8723	0	47.5	48	47.5
1535	48.9583	47.8723	1	47.5	49	46.6667
1540	50	50	2	47.5	46	47.5
1545	51.0417	48.9362	0	48.3333	50	47.5
1550	48.9583	47.8723	2	48.3333	49	46.6667
1555	48.9583	46.8085	1	48.3333	47	47.5
1560	50	46.8085	1	48.3333	47	48.3333
1565	52.0833	47.8723	0	50	49	48.3333
1570	47.9167	50	1	48.3333	48	48.3333
1575	46.875	46.8085	2	47.5	47	48.3333
1580	51.0417	47.8723	2	45.8333	51	47.5
1585	50	46.8085	1	48.3333	49	49.1667
1590	47.9167	48.9362	0	45.8333	48	47.5
1595	47.9167	47.8723	1	48.3333	47	47.5
1600	50	47.8723	1	49.1667	49	48.3333
1605	48.9583	48.9362	1	46.6667	49	45.8333
1610	48.9583	44.6808	0	47.5	49	47.5
1615	50	47.8723	0	50	49	46.6667
1620	51.0417	45.7447	0	49.1667	50	50
1625	50	46.8085	1	50	49	47.5
1630	48.9583	48.9362	1	47.5	48	46.6667
1635	48.9583	47.8723	0	50	49	48.3333
1640	47.9167	51.0638	0	48.3333	47	49.1667
1645	51.0417	48.9362	0	49.1667	50	47.5
1650	50	46.8085	1	48.3333	49	49.1667
1655	50	47.8723	1	49.1667	49	47.5
1660	46.875	50	1	47.5	47	46.6667
1665	50	46.8085	1	49.1667	49	46.6667
1670	52.0833	45.7447	0	48.3333	50	47.5
1675	48.9583	47.8723	0	48.3333	48	49.1667
1680	50	47.8723	2	49.1667	47	50
1685	48.9583	47.8723	1	47.5	48	47.5
1690	47.9167	46.8085	2	47.5	50	47.5
1695	48.9583	48.9362	2	45.8333	48	48.3333
1700	51.0417	47.8723	2	49.1667	50	46.6667
1705	51.0417	46.8085	1	49.1667	47	49.1667
1710	52.0833	50	0	49.1667	48	48.3333
1715	48.9583	50	2	49.1667	48	49.1667
1720	50	47.8723	1	48.3333	49	50.8333
1725	47.9167	44.6808	1	50	50	48.3333
1730	52.0833	48.9362	0	50	49	49.1667
1735	48.9583	45.7447	0	49.1667	48	48.3333
1740	47.9167	48.9362	0	49.1667	48	49.1667
1745	45.8333	48.9362	0	48.3333	48	50
1750	48.9583	48.9362	1	49.1667	48	47.5
1755	48.9583	48.9362	2	48.3333	49	49.1667
1760	51.0417	50	0	49.1667	51	49.1667
1765	48.9583	46.8085	0	49.1667	49	48.3333
1770	48.9583	52.1277	0	49.1667	50	49.1667
1775	48.9583	47.8723	0	50.8333	47	48.3333
1780	50	47.8723	3	49.1667	46	47.5
1785	48.9583	46.8085	1	47.5	46	46.6667
1790	50	48.9362	0	49.1667	48	48.3333
1795	50	46.8085	2	48.3333	49	48.3333
1800	52.0833	50	0	48.3333	50	50.8333

## Sheet: Ptsm SucLLVY
time (s)	WT	WT rep	C88A rep	I216E rep	F117A rep	F121A rep
0	0.0222222	0.00340659	0.0461539	0	0.00733333	0
10	-1.36667	0.00340659	3.89231	1	-1.326	4
20	-2.75556	-1.0955	2.61026	4	1.34067	2
30	2.8	1.10231	7.73846	3	1.34067	1
40	-1.36667	1.10231	5.17436	1	1.34067	3
50	2.8	1.10231	5.17436	2	1.34067	6
60	4.18889	0.00340659	7.73846	3	2.674	5
70	2.8	3.30011	9.02051	3	2.674	5
80	1.41111	3.30011	10.3026	6	4.00733	4
90	1.41111	1.10231	7.73846	4	3.34067	6
100	1.41111	5.49791	9.02051	6	4.00733	5
110	2.8	3.30011	9.02051	3	6.674	7
120	5.57778	4.39901	10.3026	8	5.34067	9
130	4.18889	3.30011	9.02051	5	5.34067	10
140	6.96667	5.49791	12.8667	6	6.674	10
150	4.18889	8.79462	12.8667	6	8.00733	10
160	5.57778	6.59681	11.5846	12	6.674	11
170	6.96667	7.69571	14.1487	9	7.34067	9
180	8.35556	10.9924	15.4308	10	8.674	11
190	5.57778	8.79462	12.8667	10	8.674	14
200	9.74445	7.69571	12.8667	12	10.0073	13
210	5.57778	10.9924	14.1487	12	9.34067	13
220	9.74445	9.89352	12.8667	13	8.674	14
230	9.74445	9.89352	17.9949	14	10.0073	13
240	11.1333	12.0913	14.1487	13	11.3407	13
250	12.5222	13.1902	15.4308	13	11.3407	14
260	12.5222	10.9924	19.2769	13	12.0073	16
270	11.1333	14.2891	16.7128	14	13.3407	17
280	13.9111	12.0913	16.7128	15	14.674	15
290	12.5222	13.1902	23.1231	15	12.674	17
300	12.5222	14.2891	16.7128	13	14.674	16
310	15.3	16.4869	17.9949	17	16.674	16
320	13.9111	17.5858	23.1231	16	15.3407	20
330	15.3	16.4869	17.9949	19	15.3407	19
340	13.9111	18.6847	17.9949	18	14.674	21
350	15.3	19.7836	24.4051	22	16.0073	19
360	19.4667	18.6847	24.4051	18	17.3407	19
370	15.3	20.8825	23.1231	21	20.0073	19
380	16.6889	21.9814	26.9692	20	18.674	22
390	19.4667	18.6847	24.4051	25	17.3407	22
400	18.0778	19.7836	28.2513	23	20.0073	22
410	20.8556	19.7836	26.9692	25	21.3407	24
420	22.2444	23.0803	28.2513	26	19.3407	26
430	20.8556	23.0803	26.9692	25	21.3407	23
440	23.6333	21.9814	28.2513	26	22.0073	23
450	20.8556	26.377	32.0974	24	22.674	26
460	26.4111	23.0803	32.0974	25	22.0073	26
470	19.4667	27.4759	33.3795	27	24.0073	26
480	26.4111	29.6737	32.0974	26	25.3407	26
490	23.6333	24.1792	33.3795	26	24.674	27
500	26.4111	27.4759	35.9436	28	25.3407	29
510	22.2444	25.2781	34.6615	29	27.3407	26
520	27.8	29.6737	41.0718	28	27.3407	31
530	29.1889	26.377	33.3795	28	26.674	29
540	25.0222	28.5748	37.2256	30	28.674	31
550	26.4111	29.6737	39.7897	31	28.0073	31
560	27.8	31.8715	35.9436	33	30.0073	31
570	30.5778	34.0693	42.3539	31	30.674	34
580	34.7445	30.7726	39.7897	33	28.674	36
590	33.3556	34.0693	44.9179	35	30.674	32
600	29.1889	34.0693	39.7897	36	30.674	35
610	31.9667	34.0693	42.3539	36	33.3407	35
620	30.5778	34.0693	42.3539	36	34.0073	38
630	33.3556	34.0693	41.0718	34	34.0073	36
640	33.3556	34.0693	42.3539	36	34.0073	37
650	37.5222	37.366	47.4821	37	33.3407	40
660	34.7445	36.2671	46.2	38	35.3407	38
670	33.3556	37.366	46.2	36	34.674	39
680	34.7445	40.6628	46.2	37	35.3407	41
690	34.7445	39.5639	51.3282	41	36.674	44
700	37.5222	42.8606	47.4821	40	39.3407	41
710	38.9111	41.7617	50.0461	42	38.674	42
720	40.3	42.8606	51.3282	43	39.3407	44
730	41.6889	43.9594	52.6103	41	36.674	45
740	38.9111	46.1572	50.0461	42	38.674	44
750	44.4667	46.1572	51.3282	47	42.0073	49
760	40.3	46.1572	55.1744	45	41.3407	49
770	44.4667	47.2561	55.1744	43	43.3407	45
780	45.8556	46.1572	55.1744	45	42.0073	50
790	45.8556	48.3551	56.4564	45	42.674	48
800	45.8556	50.5529	57.7385	49	42.674	49
810	45.8556	50.5529	55.1744	46	44.0073	52
820	48.6333	51.6518	59.0205	49	44.674	50
830	47.2445	49.454	60.3026	49	44.674	51
840	48.6333	53.8496	62.8667	51	46.0073	54
850	45.8556	56.0474	60.3026	55	50.0073	55
860	48.6333	56.0474	62.8667	50	48.674	54
870	54.1889	52.7507	61.5846	53	48.0073	53
880	52.8	57.1463	64.1487	52	50.0073	56
890	50.0222	61.5419	67.9949	56	48.674	59
900	50.0222	59.3441	67.9949	56	51.3407	57
910	58.3556	61.5419	64.1487	54	51.3407	61

## Sheet: TMT_correlation
F117A, BR1, Abundance	F117A, BR2, Abundance	F117A DOX, BR1, Abundance	F117A DOX, BR2, Abundance	F117A DOX, BR1, Abundance	F117A DOX, BR3, Abundance	F117A DOX, BR2, Abundance	F117A DOX, BR3, Abundance	WT, BR1, Abundance	WT, BR1, Abundance	WT DOX, BR1, Abundance	WT DOX, BR2, Abundance	WT DOX, BR1, Abundance	WT DOX, BR3, Abundance	WT DOX, BR2, Abundance	WT DOX, BR3, Abundance		I216E, BR1, Abundance	I216E, BR2, Abundance	I216E DOX, BR1, Abundance	I216E DOX, BR2, Abundance	I216E DOX, BR1, Abundance	I216E DOX, BR3, Abundance	I216E DOX, BR2, Abundance	I216E DOX, BR3, Abundance	WT, BR1, Abundance	WT, BR1, Abundance	WT DOX, BR1, Abundance	WT DOX, BR2, Abundance	WT DOX, BR1, Abundance	WT DOX, BR3, Abundance	WT DOX, BR2, Abundance	WT DOX, BR3, Abundance		WT, BR1, Abundance	F117A, BR1, Abundance		WT DOX, BR1, Abundance	F117A DOX, BR1, Abundance		WT, BR1, Abundance	I216E, BR1, Abundance		WT DOX, BR1, Abundance	I216E DOX, BR1, Abundance
27847.7	35045.1	45463.7	44690.5	45463.7	33002.4	44690.5	33002.4	38608	47439.7	45292.7	46425	45292.7	45253.9	46425	45253.9		19987.2	18778.1	8.5	7.6	18313.9	16747.1	7.6	12.4	16158.7	17403	17713.9	13992.9	62160.1	19770.8	49799.7	19770.8		35045.1	47439.7		33002.4	45253.9		19987.2	17713.9		17411.9	17713.9
18063.2	23770.8	46648.4	47982.1	46648.4	30403.9	47982.1	30403.9	33818.9	40802.1	29977.5	27329.2	29977.5	28067	46231.3	41670.4		73884.9	71346.6	10.9	8.2	54393.2	66613.8	8.5	14.9	65629.4	63080.3	62160.1	49799.7	47800.9	15274.3	40025.6	15274.3		23770.8	40802.1		30403.9	41670.4		73884.9	62160.1		67099.1	62160.1
6820.4	8234.2	21038.3	20782.3	21038.3	11492.3	20782.3	11492.3	31374.8	39161.2	25927.6	26745.3	25927.6	26073.2	35431.4	38913.6		45514.8	45886.1	14.8	8.2	28585.5	34871.8	8.6	13.4	22489.8	23671.5	23754.3	19433.7	36783.4	14169.9	28528.6	14169.9		8234.2	39161.2		11492.3	38913.6		45514.8	23754.3		40918.8	23754.3
3662.5	6842.4	31814.8	24270.8	31814.8	12264	24270.8	12264	47652.4	59379.5	28480	27154.3	28480	25767.9	34222.1	37661.8		38759.8	36845.5	11.4	8.5	26433	27423	10.9	8.4	39778.2	40322	38833.1	33263.3	38269.2	14154.9	31568.5	14154.9		6842.4	59379.5		12264	37661.8		38759.8	38833.1		33952.1	38833.1
11451.7	12924	19244.5	18954.2	19244.5	15627.6	18954.2	15627.6	24302.2	30953.8	27630.3	25144.6	27630.3	25736.1	29423.2	31316.2		31437.9	30782.6	13.9	8.8	31663.5	38380.8	10.9	10.5	31423.1	28150.7	32065.4	25532.7	27700.9	11464.1	24541	11464.1		12924	30953.8		15627.6	31316.2		31437.9	32065.4		26036.9	32065.4
20902.9	25314.1	30678.9	30031.6	30678.9	21209.6	30031.6	21209.6	23477.9	28833.1	23639.3	20278.3	23639.3	23808.9	27329.2	28067		43019.9	41124	15.8	9.1	22479.3	28625	10.9	8.2	48981.8	46968.7	47800.9	40025.6	25749	11104.6	21680.7	11104.6		25314.1	28833.1		21209.6	28067		43019.9	47800.9		37520	47800.9
4442	7744.4	26673.2	25434.7	26673.2	12877.9	25434.7	12877.9	23366.3	28483.2	22695.8	22273.7	22695.8	23083	26553.6	26869.1		60332.8	60414.9	21.6	10.1	18578.5	21810.6	11	11.7	43701.2	44853.9	36783.4	28528.6	27499.1	10878.2	24047.4	10878.2		7744.4	28483.2		12877.9	26869.1		60332.8	36783.4		59683.8	36783.4
17626.3	21137.3	25753.5	25173.7	25753.5	18141.2	25173.7	18141.2	23357.7	28556.7	23369.5	22548.6	19216.2	21526.1	26745.3	26073.2		26948	27500.2	16.4	10.2	25659	31803.9	11.2	13.6	39270.5	39463.2	38269.2	31568.5	26641.9	10368.1	20452.8	10368.1		21137.3	28556.7		18141.2	26073.2		26948	38269.2		31537.2	38269.2
16645.4	22800.6	26935.4	26483	26935.4	18318.9	26483	18318.9	23268.7	27816.4	16428	20413.1	23369.5	21203.6	27154.3	25767.9		24039	23398.3	16.7	10.2	26014.7	27712	11.3	13.5	24744.1	25390.3	24257.9	19485	24468.4	10039	20300.9	10039		22800.6	27816.4		18318.9	25767.9		24039	24257.9		21805.8	24257.9
19246.2	23490.7	28278.2	27947.1	28278.2	19461.9	27947.1	19461.9	21418.5	25990.1	22207.7	20943.2	22207.7	20795.3	25144.6	25736.1		33718	32572.3	10.9	10.5	24240.2	26355	11.4	11	30164.1	33751.5	27700.9	24541	23624.7	9636.8	19835.7	9636.8		23490.7	25990.1		19461.9	25736.1		33718	27700.9		33039.7	27700.9
6809.9	9575.1	25989.1	26286.9	25989.1	15284.7	26286.9	15284.7	19907.2	23831.3	21780.4	21152.9	21780.4	20487.6	24274.7	23848.4		30624.7	29531.3	20.5	10.7	20861.6	24212.2	11.4	8.5	28156.7	28882.5	25749	21680.7	28984.4	9587.2	24833.9	9587.2		9575.1	23831.3		15284.7	23848.4		30624.7	25749		27018.8	25749
12575.5	15942.6	20846.6	20174	20846.6	15059.1	20174	15059.1	18575	23753.1	21431.7	21089.3	21431.7	20314.9	20278.3	23808.9		28020.4	27357.7	9.3	10.9	13975.5	17345.2	11.5	12	30462.3	30097.6	27499.1	24047.4	26826.7	9290.9	24361.3	9290.9		15942.6	23753.1		15059.1	23808.9		28020.4	27499.1		24452.1	27499.1
16211.6	19822.3	24410.2	23717.8	24410.2	17356.8	23717.8	17356.8	19810.7	24576.3	18023.2	20038.2	18023.2	19672.4	22273.7	23083		26819.5	26745.3	11.4	11	25490.9	29719.6	12	14.8	26999.2	25169.4	26641.9	20452.8	23990.7	8715.5	19765.3	8715.5		19822.3	24576.3		17356.8	23083		26819.5	26641.9		24802.7	26641.9
7143.5	11051.6	20437.4	20304.7	20437.4	13253.6	20304.7	13253.6	17789.7	21693	21951.9	21104	21951.9	19311.7	23131.3	21526.1		16357.9	17736.1	11.2	11.2	16559.1	21333.8	12.5	12.2	18887.3	20317.2	19747	17398.4	19110.3	8432.6	15403.6	8432.6		11051.6	21693		13253.6	21526.1		16357.9	19747		34546	19747
15908.8	19008.5	22985	22941.5	22985	16058.9	22941.5	16058.9	18046.5	22160.6	19026.8	18985.3	19026.8	18938.7	22548.6	21203.6		31390.9	30533	9.6	11.3	10108.2	12128.4	13.1	12.9	26992.3	28246.3	24468.4	20300.9	22142.6	8096.9	20000.5	8096.9		19008.5	22160.6		16058.9	21203.6		31390.9	24468.4		28673.6	24468.4
7525.6	9982.5	17071.9	17032	17071.9	11675.5	17032	11675.5	17685.1	21675.2	12143.2	16775.7	15443.5	17784.4	20413.1	21202.7		18498.4	19047.3	11	11.7	19021.1	22613.9	13.6	30.3	18601.8	19746.8	18452.1	15367.5	23677.6	7971.7	22477.6	7971.7		9982.5	21675.2		11675.5	21202.7		18498.4	18452.1		37994.7	18452.1
14254.1	17072.3	20053.4	19674.9	20053.4	15667.4	19674.9	15667.4	17112.8	21070.2	10724	16552.5	18263.5	17699.4	20943.2	20795.3		12512.7	12421.2	11.5	12	15241.8	15836.4	13.8	12.3	11400.9	12436.8	11765.5	10165	18132.3	7584.4	14284.2	7584.4		17072.3	21070.2		15667.4	20795.3		12512.7	11765.5		14869.1	11765.5
15981.9	19730.7	23437.4	23032	23437.4	16181.2	23032	16181.2	17251.3	21025.3	15443.5	17912.6	19318.5	17699	21152.9	20487.6		23105.3	23172.8	12.5	12.2	17912.2	22096.7	13.9	19.9	23760.2	23974.8	23624.7	19835.7	17990.5	7460.5	16156.8	7460.5		19730.7	21025.3		16181.2	20487.6		23105.3	23624.7		22381.7	23624.7
12582.8	16254.6	21703.3	21443.2	21703.3	15727.7	21443.2	15727.7	17007.6	20846.9	18263.5	19058.7	18215.8	17463.3	21089.3	20314.9		17438.3	16985.8	13.8	12.3	15445.2	19803.1	13.9	8.8	16193.8	17442.7	15801.5	13303.4	25400.7	7366.5	21804.7	7366.5		16254.6	20846.9		15727.7	20314.9		17438.3	15801.5		15618.1	15801.5
6429.3	8835.9	15464.7	15738.2	15464.7	10959.2	15738.2	10959.2	16298.4	19957.4	19318.5	18215.7	18937.1	17245.1	20038.2	19672.4		20858.9	21118.7	18.3	12.5	12606.9	14495.8	14.4	19.2	28256.5	28216.5	28984.4	24833.9	24753.6	7271.7	19340.3	7271.7		8835.9	19957.4		10959.2	19672.4		20858.9	28984.4		24381.1	28984.4
11881.8	15504.6	19162.7	18764.6	19162.7	13744.4	18764.6	13744.4	16784.7	20440.1	18215.8	16688.6	14687.5	17057.7	21104	19311.7		17008.8	17587	13.1	12.9	16421.8	20675.2	14.8	8.2	25329.4	25488.2	26826.7	24361.3	12270.4	7191.1	10268.5	7191.1		15504.6	20440.1		13744.4	19311.7		17008.8	26826.7		26276.7	26826.7
10555.9	16711.2	20154.4	19858.4	20154.4	14648.4	19858.4	14648.4	15638.5	19528.4	18937.1	18036.2	17167.5	16678.3	18985.3	18938.7		15380.6	14890	8.6	13.4	17204.7	19271.4	15.1	16.4	15448.8	15102.5	15563.4	13694.6	17549.5	7141.2	14709.2	7141.2		16711.2	19528.4		14648.4	18938.7		15380.6	15563.4		14117.3	15563.4
6023.6	8091.3	14508.9	14775.9	14508.9	9544.6	14775.9	9544.6	15672.6	19631.2	14687.5	16929.6	16726.8	16626.2	16775.7	18539.9		22558.9	22262.2	9.1	13.6	6834	8378.5	15.1	13.6	24470.3	24480.5	23990.7	19765.3	23441	7140.9	19334.4	7140.9		8091.3	19631.2		9544.6	18539.9		22558.9	23990.7		21499.1	23990.7
4600	6301	16603.1	16541	16603.1	7852.9	16541	7852.9	16702.1	20351.4	17167.5	17100.1	17172	16482.9	16552.5	18473.2		21317.1	20681.9	15.1	13.6	16865.9	18993.6	15.7	16.1	20218.3	19803.4	19110.3	15403.6	20300.6	7115.6	17463.8	7115.6		6301	20351.4		7852.9	18473.2		21317.1	19110.3		18775.7	19110.3
7595.3	9727	14882.5	15159.7	14882.5	10207	15159.7	10207	14614.1	17810.3	16726.8	16289.9	14913.7	16205.1	17912.6	17784.4		8667.5	8671.6	20	13.8	24909.9	24680.1	15.8	9.1	9882.6	10800.5	10397.9	8831.3	11703.8	6982.7	18345.9	7093.1		9727	17810.3		10207	17784.4		8667.5	10397.9		9203.1	10397.9
13381.2	17383	20754.8	20655	20754.8	14607.9	20655	14607.9	15556.4	18964.9	17172	16715.2	19423.8	15996.5	19058.7	17699.4		19274	19276.8	12	14.8	13407.8	16531.6	15.9	16.9	22109.7	23085.2	22142.6	20000.5	17801.3	6942.5	10020.9	6982.7		17383	18964.9		14607.9	17699.4		19274	22142.6		18248.8	22142.6
13464	16388	20428.6	20028	20428.6	14207.1	20028	14207.1	14847.3	18254.5	11675.7	15173.8	17273.9	15903.7	18215.7	17699		24494.8	25505.4	8.5	14.9	19406.7	23355.5	16.1	19.6	25099.2	26527.5	23677.6	22477.6	19125.4	6905.5	14834.7	6942.5		16388	18254.5		14207.1	17699		24494.8	23677.6		22810.8	23677.6
12744.3	14807	17724.3	17381.2	17724.3	12854.1	17381.2	12854.1	14660.5	17791.2	14913.7	17417.7	17500.2	15769.6	16688.6	17463.3		46008.9	54159.6	12.7	15.1	18554.3	21386.9	16.2	18.1	24126.5	24495.3	18132.3	14284.2	23438.5	6867.2	17008.3	6905.5		14807	17791.2		12854.1	17463.3		46008.9	18132.3		48572.5	18132.3
11461.3	14145.5	18566.3	18519.6	18566.3	12929.6	18519.6	12929.6	14247.1	17514.3	19423.8	18819	13778.6	15457.3	18036.2	17245.1		17413.1	17053.1	18.1	15.4	9167.1	10664.2	16.4	10.2	18364.3	19387.8	17990.5	16156.8	21222.5	6749.4	20391.9	6867.2		14145.5	17514.3		12929.6	17245.1		17413.1	17990.5		18799.4	17990.5
5790.8	7253.9	9751.1	9808.3	9751.1	8300.1	9808.3	8300.1	13841.1	16904.1	11608.6	15969.6	15768.3	15288.1	16929.6	17057.7		25587	24695.1	16.7	15.6	23880.1	24791	16.6	17.8	27415.8	27617.8	25400.7	21804.7	11294.5	6602.3	18211.5	6749.4		7253.9	16904.1		8300.1	17057.7		25587	25400.7		23337	25400.7
10005.2	12496.1	16851.9	16619.5	16851.9	12016.6	16619.5	12016.6	13844.3	16900.2	17273.9	15789.4	17038	15031.8	17100.1	16678.3		22036.7	22836.6	21.4	16	17157.4	19730.8	16.7	16.7	25033.2	21973.2	24753.6	19340.3	17543	6594.6	8511.7	6602.3		12496.1	16900.2		12016.6	16678.3		22036.7	24753.6		21844.8	24753.6
10701.5	13507.8	15973.7	15504.8	15973.7	11259.3	15504.8	11259.3	14028.3	17480	17500.2	16757.2	18094.2	14897.7	16289.9	16626.2		10827.5	11069.4	15	16.1	14793.2	17042.6	16.7	15.6	10856.7	11504	12270.4	10268.5	14074.5	6507.5	14011.3	6594.6		13507.8	17480		11259.3	16626.2		10827.5	12270.4		12725.3	12270.4
1924.8	4166.2	14929.1	13343.1	14929.1	7950.7	13343.1	7950.7	16566.6	20405.5	13778.6	16066.4	15876	14875.1	16809.8	16510.3		27334.7	26556.3	15.7	16.1	18432.4	21784.6	16.7	10.2	21828.2	21479.5	17549.5	14709.2	13320.2	6413	11861	6507.5		4166.2	20405.5		7950.7	16510.3		27334.7	17549.5		24020.3	17549.5
10274.8	12328	16710.1	16592.5	16710.1	11877.5	16592.5	11877.5	13822.5	16879.4	15768.3	14900.7	15309.2	14833.7	16715.2	16482.9		18912.4	19415.8	12.1	16.2	19756.2	23949.5	16.9	18.8	23283.6	22200.4	23441	19334.4	15833.4	6411.1	10901.4	6413		12328	16879.4		11877.5	16482.9		18912.4	23441		19806.8	23441
4423.3	5867.2	12339.8	12467.5	12339.8	8088.2	12467.5	8088.2	13266.4	16206.8	17038	15749.8	16194.2	14772.1	15173.8	16385.5		16225.4	16115.2	18.4	16.3	27712.7	24421.5	17.3	17	19393.7	19340.9	20300.6	17463.8	21970.3	6347.4	14123.4	6411.1		5867.2	16206.8		8088.2	16385.5		16225.4	20300.6		18235.1	20300.6
4043.6	7043.8	13991.8	13601.1	13991.8	9395.2	13601.1	9395.2	13865.4	16818.9	18094.2	17794.1	14195.3	14455.6	17417.7	16205.1		24230.6	23493.6	19.7	16.6	13593.9	15173.8	17.4	19.5	25011.3	24824.5	22453.2	18345.9	16012	6291.6	18957.6	6347.4		7043.8	16818.9		9395.2	16205.1		24230.6	22453.2		21390.7	22453.2
13037	15811.2	18392.5	18728.2	18392.5	12563	18728.2	12563	15217.4	18798.7	15876	15015	16453.3	14314	18819	15996.5		25782.9	25848.8	17.7	16.6	15617.4	18713	17.7	16.6	30718.4	29147.4	30966.1	25056.4	17035	6174	13565.5	6291.6		15811.2	18798.7		12563	15996.5		25782.9	30966.1		24332.3	30966.1
4386.5	5608.6	12419.1	12358.8	12419.1	6835.8	12358.8	6835.8	13218	16014.7	15309.2	15087.2	14965.9	13874.5	15969.6	15958.7		24918.2	27961.3	17.5	16.7	18983.8	21937	17.8	17.3	13675.8	13914.7	11703.8	10020.9	20789.3	6142.9	14175.1	6174		5608.6	16014.7		6835.8	15958.7		24918.2	11703.8		23363.8	11703.8
11863.9	14371.5	17818.7	17486.5	17818.7	12746.3	17486.5	12746.3	13215.1	16170.3	16194.2	15521	15659.6	13835.9	15789.4	15903.7		16442.3	16081.7	22.3	16.7	20943.8	23803.6	18.1	15.4	17772.3	16914.7	17801.3	14834.7	23269.6	5977.9	18151.5	6142.9		14371.5	16170.3		12746.3	15903.7		16442.3	17801.3		13913.7	17801.3
12482.2	14795.6	17663.7	17506.5	17663.7	12699.4	17506.5	12699.4	13138.8	16131.7	14195.3	14885.7	14527	13718.6	16757.2	15769.6		20188.5	19457.1	18	16.9	18434.8	17471.9	18.3	12.5	21410.2	22187	19125.4	17008.3	8883.9	5894	19353.4	5977.9		14795.6	16131.7		12699.4	15769.6		20188.5	19125.4		18320.1	19125.4
5039.1	7272.6	14463	13969.7	14463	9042.1	13969.7	9042.1	13549	16625.8	16453.3	15946.1	13892.2	13508.9	16066.4	15457.3		20906.6	20801.6	15.9	16.9	14424.1	17296	18.3	19.2	22807.3	22851.2	23438.5	20391.9	11531.8	5887.6	8019.3	5894		7272.6	16625.8		9042.1	15457.3		20906.6	23438.5		21630.2	23438.5
10390.8	12730.6	16206.3	15878.9	16206.3	11465.4	15878.9	11465.4	12766.4	15577.3	14965.9	14399	12968.9	13443.3	14900.7	15288.1		25425.3	25082.8	17.3	17	9099.4	10639.6	18.4	17.2	23986.7	25103.7	21222.5	18211.5	13030.5	5845.7	9457.5	5887.6		12730.6	15577.3		11465.4	15288.1		25425.3	21222.5		22938.5	21222.5
2168	3714.3	14729	15014.8	14729	6676.3	15014.8	6676.3	13279.1	16017.1	15659.6	15871.8	13725.5	13396.7	12781.7	15058.3		19077.1	20897.3	20.3	17.2	10105.3	12287.1	18.4	16.3	11475.6	11670.1	11294.5	8511.7	8204.4	5807.8	10299	5845.7		3714.3	16017.1		6676.3	15058.3		19077.1	11294.5		19227.1	11294.5
3474.6	4688.6	13837.7	13856	13837.7	6269.1	13856	6269.1	12761.1	14971.4	14527	14903.2	14123	13233.1	13585.1	15057.9		18505.9	17960.2	18.4	17.2	13018.3	14438.7	18.8	17.6	18705.1	18679	17543	14011.3	16940.5	5752.6	7390.4	5807.8		4688.6	14971.4		6269.1	15057.9		18505.9	17543		17126.1	17543
9788.7	13733.5	15901.9	15384.5	15901.9	11290.7	15384.5	11290.7	12650.1	15549.4	8698.9	13632	13326.3	13171.8	15749.8	15031.8		10810.6	10889.3	17.8	17.3	16893.6	20723.5	18.9	16.3	12315.4	12900.6	14074.5	11861	20098.6	5724.9	14624.6	5752.6		13733.5	15549.4		11290.7	15031.8		10810.6	14074.5		13807.1	14074.5
11218.1	14252.7	15922.4	16371	15922.4	11716.7	16371	11716.7	12784.7	15432.5	13892.2	13737.6	13277.4	13088.5	17794.1	14897.7		13369.6	13028.5	12	17.4	12577	14457.8	19.2	19.1	13962	13170.2	13320.2	10901.4	15091.7	5612.5	16504.1	5724.9		14252.7	15432.5		11716.7	14897.7		13369.6	13320.2		12758.7	13320.2
12002.7	14873	17313.9	17098.1	17313.9	11984.4	17098.1	11984.4	12793.9	15842.2	12968.9	13483	12644.6	13007.3	15015	14875.1		15705.9	15329.6	18.8	17.6	15202.9	16461.6	19.3	18.2	15431.8	16270.7	15833.4	14123.4	14914.7	5601.8	13071.5	5612.5		14873	15842.2		11984.4	14875.1		15705.9	15833.4		14615.3	15833.4
10313.1	12192.1	14729.7	14574.4	14729.7	10774	14574.4	10774	12263.6	15084.7	13725.5	13700.5	12470.8	12959.4	15087.2	14833.7		20843.9	20779.7	48.4	17.7	15904.2	21083.2	19.3	18.6	22609	21984.8	21970.3	18957.6	13215.5	5486.5	12889.5	5601.8		12192.1	15084.7		10774	14833.7		20843.9	21970.3		21964.2	21970.3
9469.9	13380.9	15487.9	14894.7	15487.9	11406	14894.7	11406	12228.6	15074.3	14123	13021	9784.4	12899.7	15521	14772.1		15154.1	15030.8	16.6	17.8	17530.6	21039.6	19.4	21.6	15114.1	14669.5	16012	13565.5	7734.8	5360.9	11354.4	5486.5		13380.9	15074.3		11406	14772.1		15154.1	16012		15090.7	16012
6555.7	8215.6	11482.4	11319	11482.4	8126	11319	8126	11878.3	14417.2	13326.3	12218.4	14228.1	12628.3	14885.7	14455.6		17929.4	17796.2	22.4	18.1	7932.3	6264.2	19.7	16.6	16734.2	16115.5	17035	14175.1	9171.7	5223.7	6213.3	5360.9		8215.6	14417.2		8126	14455.6		17929.4	17035		16179.2	17035
9907.5	12940.6	13419.6	13346.5	13419.6	10007.6	13346.5	10007.6	12364.8	14939.1	13277.4	12928.8	11926.5	12440	15946.1	14314		20668.6	18669.5	21.6	18.1	6555	8229.3	19.8	23.5	22185.7	20835.2	20789.3	18151.5	13900.7	5153	7716.3	5223.7		12940.6	14939.1		10007.6	14314		20668.6	20789.3		32103.1	20789.3
8227.4	11275.6	10738.5	10510.2	10738.5	9468.2	10510.2	9468.2	11580.5	14476.3	12644.6	12437	11831.9	12410.6	14399	13874.5		22460.2	21852.6	19.3	18.2	8476.4	10221	20	13.8	24540.2	23627.9	23269.6	19353.4	12017.7	5147.6	11582.2	5153		11275.6	14476.3		9468.2	13874.5		22460.2	23269.6		20536.7	23269.6
10080.8	12157.4	14395.1	14003.6	14395.1	9997.3	14003.6	9997.3	12758.1	15562.2	12470.8	12731	13413.4	12337.5	15871.8	13835.9		8409.8	8748.2	20.8	18.5	10026.1	11928.7	20.2	19.7	3241	3428.6	3110.9	2569.2	11779.1	5125.9	9968.4	5147.6		12157.4	15562.2		9997.3	13835.9		8409.8	3110.9		8491.4	3110.9
8909.3	11250.1	13828.1	13432.1	13828.1	9664.9	13432.1	9664.9	12322.6	15068.1	9784.4	12906.9	13111.8	12314.9	14903.2	13718.6		8288.6	7987.5	19.3	18.6	6772	7874.8	20.3	21.8	8620.8	9343.8	8883.9	8019.3	8593.3	5114.2	9773.6	5125.9		11250.1	15068.1		9664.9	13718.6		8288.6	8883.9		9055.5	8883.9
2371.4	5474.8	14132.5	11180.6	14132.5	7388.8	11180.6	7388.8	16627.1	20727.2	14228.1	13293.1	12693.2	12298.4	13632	13563.6		10577.3	10534.7	15.7	18.9	15518.9	18413.2	20.3	17.2	11374.1	10997.8	11531.8	9457.5	12047.1	5101.3	6826.9	5114.2		5474.8	20727.2		7388.8	13563.6		10577.3	11531.8		10552.4	11531.8
9725.3	11423.2	14226.7	13895.1	14226.7	10206	13895.1	10206	11303.2	13983.4	11926.5	12600.5	8835.3	12210.1	13737.6	13508.9		12504.7	12707.4	19.2	19.1	14336.3	16945.4	20.4	20.2	12616.4	12508.8	13030.5	10299	15748.7	5096.6	10362.7	5101.3		11423.2	13983.4		10206	13508.9		12504.7	13030.5		12567.2	13030.5
7503	8833.6	14369.7	14275.9	14369.7	8650.3	14275.9	8650.3	11289.3	13600.4	11831.9	12382.7	11747.7	12117.1	13483	13443.3		8244.4	8224.4	14.4	19.2	10329.6	13046.9	20.5	10.7	8157.5	8829.2	8204.4	7390.4	7374.5	5064.9	13035.4	5096.6		8833.6	13600.4		8650.3	13443.3		8244.4	8204.4		8427.7	8204.4
9664.7	11411.8	13563.7	13167.9	13563.7	9490.7	13167.9	9490.7	12272.8	14873	13413.4	12867.1	14107.5	12038.3	13700.5	13396.7		19530.4	18771.3	22.5	19.2	12357.3	14057.7	20.8	18.5	19312	19710.2	16940.5	14624.6	10716.9	5057.3	6430.5	5064.9		11411.8	14873		9490.7	13396.7		19530.4	16940.5		17768.8	16940.5
8762.9	10706.3	12551.7	12413.6	12551.7	9812.5	12413.6	9812.5	10907.8	13506.9	13111.8	11966.3	11583.3	11904.6	13021	13233.1		16372.2	16637.1	18.3	19.2	13688.6	15045.3	20.9	20.3	20299.8	17857.2	20098.6	16504.1	9059.4	5049.5	9209.2	5057.3		10706.3	13506.9		9812.5	13233.1		16372.2	20098.6		17782.4	20098.6
7929.4	9104.4	10227.1	9859.3	10227.1	9114.3	9859.3	9114.3	10389	13217.3	12693.2	12716.5	13398.3	11740.2	12218.4	13171.8		12984.8	12595.3	16.9	19.8	16628	15857.1	20.9	21	15666.3	16221.6	15091.7	13071.5	14653.6	4950.9	6994	5049.5		9104.4	13217.3		9114.3	13171.8		12984.8	15091.7		14104.5	15091.7
6843.3	8526.6	12991.2	12942.7	12991.2	8504.9	12942.7	8504.9	10800.2	13404.9	8835.3	13124.2	12545.5	11173.6	12928.8	13088.5		15215.9	14734	24	19.8	16309	18157.9	21	22.6	15479.6	15602.1	14914.7	12889.5	15038.5	4920.4	11630.2	4950.9		8526.6	13404.9		8504.9	13088.5		15215.9	14914.7		13674.8	14914.7
10529.9	12530.7	15833.9	14935.9	15833.9	10642	14935.9	10642	11574.7	14413.1	11747.7	12936.9	12671.6	10938.4	12437	13007.3		16237.9	15763.7	13.9	19.9	11511.1	13426	21.1	13.7	15362.2	15875.1	13215.5	11354.4	5203	4889.6	12942.8	4920.4		12530.7	14413.1		10642	13007.3		16237.9	13215.5		14624.8	13215.5
5149.5	8921.2	11699.1	10034.3	11699.1	7687.5	10034.3	7687.5	14054.8	17493.4	14107.5	13601	8872.3	10922.3	12731	12959.4		17217.5	17654	22.2	20	9072	10546.7	21.1	21	10162.8	10358.4	7734.8	6213.3	9074.1	4858	4921.7	4889.6		8921.2	17493.4		7687.5	12959.4		17217.5	7734.8		16370.3	7734.8
2826.7	4838.7	10095.5	10223.4	10095.5	6097.1	10223.4	6097.1	10998.5	13237.2	11583.3	12924.1	11550.6	10906.6	12906.9	12899.7		19452	18888.1	26.8	20.1	20681.6	21350.1	21.2	25.5	10664	12463.8	9171.7	7716.3	7825.2	4825.5	7808.8	4858		4838.7	13237.2		6097.1	12899.7		19452	9171.7		18679.3	9171.7
10095	11835.7	12619	12677.4	12619	9210.6	12677.4	9210.6	10980.7	13642.4	13398.3	13310.6	10933.6	10781.6	13293.1	12628.3		14377.9	14098.4	15.2	20.2	16780.3	17271.2	21.4	16	13946.3	14184.4	13900.7	11582.2	8121.1	4801.1	6622.7	4825.5		11835.7	13642.4		9210.6	12628.3		14377.9	13900.7		15948.5	13900.7
7952.3	10011.8	13674.5	14298.5	13674.5	9486.8	14298.5	9486.8	9567.3	11305.1	5886.3	9193.7	8513.3	10747.7	12600.5	12440		11862.4	11732.3	21.2	20.4	8592.2	10810.5	21.6	10.1	12709.8	12785.7	12017.7	9968.4	14283.8	4779.1	7716	4801.1		10011.8	11305.1		9486.8	12440		11862.4	12017.7		10820.5	12017.7
8367.3	11231.6	14274.1	13710.8	14274.1	10076.9	13710.8	10076.9	10946.2	13396.4	12545.5	12223	11195.8	10617.5	12382.7	12410.6		22938.1	22926	18.9	20.6	13119.9	15123	21.6	18.1	14372.1	15383	11779.1	9773.6	10415.4	4727.4	12047.5	4779.1		11231.6	13396.4		10076.9	12410.6		22938.1	11779.1		20933.9	11779.1
6906.7	9652.8	12061.7	11639.6	12061.7	8101.4	11639.6	8101.4	11288.9	13176.5	12671.6	11824.4	6062	10541.8	12867.1	12337.5		19425.7	18362	17.6	20.9	7025.1	6593.3	21.7	24.1	10083.3	9808.5	8593.3	6826.9	8411.4	4724.3	9052.1	4727.4		9652.8	13176.5		8101.4	12337.5		19425.7	8593.3		18030.2	8593.3
9139.2	10289.4	12439	12086.1	12439	8545.5	12086.1	8545.5	10198.6	12424.6	3945.5	8638.8	10738.6	10456.6	11966.3	12314.9		10826	10798.1	20.9	21	7871.2	9573.8	22.2	19.1	11987.7	12510.4	12047.1	10362.7	6740.5	4708.1	7447.8	4724.3		10289.4	12424.6		8545.5	12314.9		10826	12047.1		11486.3	12047.1
8030.7	9992.5	12754.9	12970	12754.9	9179.3	12970	9179.3	10188.8	12440.7	8872.3	10706.5	10777.9	10286.6	12716.5	12298.4		16184.1	16066.5	21.1	21	15736.8	15308.2	22.2	20	15828.7	15599.7	15748.7	13035.4	4306.1	4688.1	5819.6	4708.1		9992.5	12440.7		9179.3	12298.4		16184.1	15748.7		14411.8	15748.7
3963.9	5504.9	12532.9	12594.4	12532.9	6883.3	12594.4	6883.3	10294.6	12283.1	11550.6	11265.4	12644	10040.5	13124.2	12210.1		7654.3	7572	17.5	21.1	10622.6	12688	22.3	16.7	7163.3	8022.6	7374.5	6430.5	12909.5	4667.6	3695.7	4688.1		5504.9	12283.1		6883.3	12210.1		7654.3	7374.5		7536.8	7374.5
5282.3	6761	12308	12073.6	12308	7485	12073.6	7485	10058.2	12271.4	4753.9	8516.7	10037.7	10028.4	12936.9	12117.1		10143.8	9744	27.9	21.1	9243.2	10449.5	22.4	18.1	11163.5	11883.1	10716.9	9209.2	13563.8	4637.6	11003.7	4667.6		6761	12271.4		7485	12117.1		10143.8	10716.9		9494.1	10716.9
8369	11635.5	11932.2	11730.4	11932.2	9047.8	11730.4	9047.8	10092.6	12358.9	10933.6	10895.8	10361.2	10019	13601	12038.3		16545.5	20183.7	19.4	21.6	12552	13100.1	22.5	19.2	8592.6	9328.2	9059.4	6994	9117.9	4625.3	11148.4	4637.6		11635.5	12358.9		9047.8	12038.3		16545.5	9059.4		33760.5	9059.4
6559.1	9741.8	13625.4	14007.7	13625.4	9591.4	14007.7	9591.4	12250.5	14770.7	8513.3	11523.1	9966	9864.4	12924.1	11904.6		13639.3	13429.7	20.6	21.7	15679.7	16446	22.5	30.8	14418.2	13832.8	14653.6	11630.2	10627	4587.1	7882.1	4625.3		9741.8	14770.7		9591.4	11904.6		13639.3	14653.6		12458.2	14653.6
7438.9	9823.1	11829.3	11368.1	11829.3	8338.5	11368.1	8338.5	10527.5	12927.6	11195.8	10633	10534.6	9835.1	13310.6	11740.2		10390.3	12107.4	20.3	21.8	6863.2	7887.5	22.9	32.6	14346.3	14722.1	15038.5	12942.8	13602.6	4561.6	9000	4587.1		9823.1	12927.6		8338.5	11740.2		10390.3	15038.5		18652.3	15038.5
2977.1	4342.9	11613	11911	11613	5853.6	11911	5853.6	10494.2	12339.4	6062	9887.6	10324.1	9810.6	9193.7	11289.3		14342.6	14655.7	23.2	21.9	11891.7	14378.5	22.9	24.8	6711.4	7387.6	5203	4921.7	9466.8	4560.9	11772.1	4561.6		4342.9	12339.4		5853.6	11289.3		14342.6	5203		17519.7	5203
4852.6	7470.9	11048.8	10855.7	11048.8	7713	10855.7	7713	9610.2	11813.6	10738.6	10076.1	9779.8	9799.2	12223	11173.6		18100.7	18342.4	28	22	7625.8	9433.4	23.1	24.5	10162.8	11126.8	9074.1	7808.8	11183.9	4513.7	8411.9	4560.9		7470.9	11813.6		7713	11173.6		18100.7	9074.1		17945.9	9074.1
7493.8	9872	11317.1	10955.1	11317.1	7930.1	10955.1	7930.1	8986.3	10954.3	10777.9	10573.6	10425.8	9712.2	11824.4	10938.4		19320.3	26505.4	22.2	22	10846.6	11241.3	23.2	21.9	7929.3	8039	7825.2	6622.7	5232.9	4477.9	9408.1	4513.7		9872	10954.3		7930.1	10938.4		19320.3	7825.2		20197	7825.2
2026.5	2825.6	10649.1	10309.3	10649.1	4121.1	10309.3	4121.1	10684.7	12973.7	4775.4	8711.6	10677.9	9662.1	8638.8	10930.8		8731.3	7849.2	24	22	22670.3	21408.4	24	22	8898.4	9598.5	8121.1	7716	17587.3	4474.3	4651.2	4477.9		2825.6	12973.7		4121.1	10930.8		8731.3	8121.1		10936.1	8121.1
3328.4	6759.5	9828.3	7579.8	9828.3	6021.6	7579.8	6021.6	13446.8	16783.6	12644	11258	10628.2	9602.1	10706.5	10922.3		15524	14799.6	48.3	22.1	2993.9	3802.5	24	19.8	15677.9	15805.7	14283.8	12047.5	13356	4464.2	14614.8	4474.3		6759.5	16783.6		6021.6	10922.3		15524	14283.8		14250	14283.8
8367.4	10281.9	12556.2	12039.9	12556.2	8735.6	12039.9	8735.6	9891.8	11931.9	3281.4	7315.7	10372.8	9450.3	11265.4	10906.6		9624	9214.5	11.8	22.2	13860.2	15823.1	24.2	19.2	10708.7	11022.3	10415.4	9052.1	6105.5	4452.1	11745.1	4464.2		10281.9	11931.9		8735.6	10906.6		9624	10415.4		9586.8	10415.4
1797.2	3004.6	9283.5	9087.4	9283.5	4565.9	9087.4	4565.9	10324.8	12552.5	10037.7	9762	6025.7	9447.9	8516.7	10889.9		12273.3	12277.3	33.9	22.3	10140.7	12754.4	24.7	26	9860.2	10656.5	8411.4	7447.8	8295.4	4447.5	4658.9	4452.1		3004.6	12552.5		4565.9	10889.9		12273.3	8411.4		11187	8411.4
6548	8785.3	13049	12890.9	13049	8970.3	12890.9	8970.3	8862.1	10697.2	10361.2	10012.1	6322.4	9411.6	10895.8	10781.6		24316.2	24770.7	24.6	22.4	7585.3	9475	25	10.5	6947.9	7486.9	6740.5	5819.6	11484.5	4394.5	7390.8	4447.5		8785.3	10697.2		8970.3	10781.6		24316.2	6740.5		22155.7	6740.5
2272.1	4543	10233.8	9117.1	10233.8	5895.3	9117.1	5895.3	11151.3	13662.5	9966	9636.5	6929.7	9398.3	11523.1	10747.7		4024.5	4011.1	21	22.6	13371.6	14600.6	25.3	24.2	4165.2	4543.2	4306.1	3695.7	8988.8	4390.7	9440	4394.5		4543	13662.5		5895.3	10747.7		4024.5	4306.1		5174.7	4306.1
7300.3	9055.1	11048.2	10820.5	11048.2	7941.9	10820.5	7941.9	8709.6	10770.5	10534.6	9302.9	8042.2	9357	10633	10617.5		16296.8	16382.8	19.3	22.9	12284.2	14469.7	25.5	27	14305.7	14604.2	12909.5	11003.7	3447.4	4384.8	8389.7	4390.7		9055.1	10770.5		7941.9	10617.5		16296.8	12909.5		15094.3	12909.5
1737.2	3609.4	9604.6	7048	9604.6	4643.8	7048	4643.8	13808.9	17000.4	10324.1	10227.5	11165.3	9266.9	9887.6	10541.8		12405.4	12609.8	17.4	22.9	9722.9	10748.2	25.8	23.2	13735	13486.7	13563.8	11148.4	8606.2	4366.1	2710	4384.8		3609.4	17000.4		4643.8	10541.8		12405.4	13563.8		13196.4	13563.8
7117.8	8716.4	10913.5	10674.6	10913.5	7565.9	10674.6	7565.9	8892.1	10855.1	9779.8	10135.7	10110	9070.5	10076.1	10456.6		10024.2	9585.1	26.9	23	11044.7	11831.6	26	20.2	9537	9396	9117.9	7882.1	7648.5	4227.4	7405.2	4366.1		8716.4	10855.1		7565.9	10456.6		10024.2	9117.9		12044.4	9117.9
8561.6	10456.5	13213.8	12712.2	13213.8	9051	12712.2	9051	9025	11132	10425.8	10718.4	9788.8	9017.7	10573.6	10286.6		16245.7	16203	24.8	23.1	4084.8	4800.5	26.6	31.6	12681	13035.9	10627	9000	11534.8	4219.9	14409.2	4276.6		10456.5	11132		9051	10286.6		16245.7	10627		14834.6	10627
996.9	1407.5	6449.7	6768.2	6449.7	3606.1	6768.2	3606.1	7900.1	9563.7	10677.9	10047.9	9450.1	8889.5	9129.5	10212.3		15340.2	14935.4	29.6	23.4	12331	15116	26.8	20.1	14736	15392.1	13602.6	11772.1	12682.7	4181.1	6499.1	4227.4		1407.5	9563.7		3606.1	10212.3		15340.2	13602.6		13690.6	13602.6
1816.2	2540.2	7091.2	7036.1	7091.2	3590.1	7036.1	3590.1	8722.4	10565	10628.2	9954.7	7426.1	8863.1	8711.6	10102.5		11454.5	10971	17.5	24.2	11421.5	13621.9	26.9	27.8	10912.5	11068.2	9466.8	8411.9	9191.9	4146.3	9450	4219.9		2540.2	10565		3590.1	10102.5		11454.5	9466.8		10216.5	9466.8
7978.4	10789.8	11790.6	11154.3	11790.6	8354.8	11154.3	8354.8	8959	11100.2	10372.8	9218.5	9224.9	8798.4	11258	10040.5		13226.7	12841.4	25.3	24.2	6066.8	5520.4	26.9	23	11990.3	12412.1	11183.9	9408.1	10414.6	4143.4	11697.2	4181.1		10789.8	11100.2		8354.8	10040.5		13226.7	11183.9		12443.7	11183.9
1520	1973.4	6695.8	6658.7	6695.8	2899.2	6658.7	2899.2	8664.9	10866.3	6025.7	9882.5	4461.2	8795	7315.7	10037.1		4976.4	5165.1	21.7	24.3	10286	11906.5	27.7	26.3	5067.8	5497.9	5232.9	4651.2	7936.3	4135.2	7942.2	4146.3		1973.4	10866.3		2899.2	10037.1		4976.4	5232.9		6349	5232.9
7178.4	8425.9	8807.5	8749.1	8807.5	7000.6	8749.1	7000.6	8497	10535.6	6322.4	10074.7	6554.3	8793.1	9762	10028.4		14899.4	14926	24.8	24.5	7212	8425.1	27.8	27.2	17876.6	16826.7	17587.3	14614.8	11425	4128	9031.9	4143.4		8425.9	10535.6		7000.6	10028.4		14899.4	17587.3		15329.4	17587.3
6053.4	7352.6	9653.1	9507	9653.1	6951	9507	6951	8137.9	9789.5	6929.7	9594.6	9380.6	8764.9	10012.1	10019		14470	14058.8	21.6	24.7	5526.2	5507.6	27.9	21.1	14596.7	15323.6	13356	11745.1	8701.5	4118.3	6538.5	4135.2		7352.6	9789.5		6951	10019		14470	13356		13202.4	13356
5991.8	8499.8	9347.3	9263.9	9347.3	6949.3	9263.9	6949.3	8421.3	10574.1	8042.2	7918.7	9264.4	8756.7	9636.5	9864.4		6624.8	6566	23	25	9438.1	10368.9	28	28.8	5250.1	5345.8	6105.5	4658.9	7120.8	4109	9633.9	4128		8499.8	10574.1		6949.3	9864.4		6624.8	6105.5		5790.5	6105.5
7231	8508.9	10201.3	9784.8	10201.3	7215.3	9784.8	7215.3	7979.9	9993	11165.3	9947.5	5498.8	8746.9	9302.9	9835.1		43356.8	55431.4	30.6	25.3	27970.4	29668.7	28.3	26.4	9520.5	10508.4	8295.4	7390.8	9048.4	4071.9	7287.1	4118.3		8508.9	9993		7215.3	9835.1		43356.8	8295.4		44559.6	8295.4
3723.4	5189.1	7383.1	7174.3	7383.1	6061.5	7174.3	6061.5	8000.9	10185.9	10110	9686.5	9113.6	8705.1	10227.5	9810.6		12404.1	12371.3	26.6	25.5	10872.9	10747.7	28.5	25.6	11403.7	11105.2	11484.5	9440	13976.7	4061.7	6390.8	4109		5189.1	10185.9		6061.5	9810.6		12404.1	11484.5		13929.3	11484.5
6729.2	8619.9	9905.5	9695.1	9905.5	7353.3	9695.1	7353.3	8449.5	10459.2	9788.8	9614.9	8215.7	8614.8	10135.7	9799.2		8929.4	8643.2	48.4	25.5	7741.4	9634.9	29	25	8909.2	9901.9	8988.8	8389.7	7146.9	4038.4	7756.2	4071.9		8619.9	10459.2		7353.3	9799.2		8929.4	8988.8		8637.9	8988.8
4660.5	6234.1	9791.6	9272.8	9791.6	6423.6	9272.8	6423.6	8798.4	10638.2	9450.1	8708.6	5367.4	8599.6	10718.4	9712.2		6173.9	6306.7	21.2	25.5	13364.2	15009.8	29.1	31.9	3588.7	3833.4	3447.4	2710	9754.4	4037.3	12329.1	4061.7		6234.1	10638.2		6423.6	9712.2		6173.9	3447.4		7436.8	3447.4
6628.4	9203.5	10655.8	10298	10655.8	7856.2	10298	7856.2	7991.1	10075.3	7426.1	8867.7	8871.3	8492.6	10047.9	9662.1		11278.6	10853.3	28.5	25.6	13406.8	14306.3	29.8	36.2	9867.3	10212.2	8606.2	7405.2	11365	3997.5	6065.5	4038.4		9203.5	10075.3		7856.2	9662.1		11278.6	8606.2		10017.3	8606.2
7561.1	8731.7	10711.9	10603.7	10711.9	7668.9	10603.7	7668.9	8304.6	9816.4	9224.9	8871.9	7991.8	8487.3	9954.7	9602.1		35308.3	33473.2	19.6	25.8	7976	9883.8	29.9	28	22881	18247.3	21200.9	14409.2	9480.3	3989.7	8508.2	4037.3		8731.7	9816.4		7668.9	9602.1		35308.3	21200.9		30861.5	21200.9
6407.3	7698.5	8951.5	8828	8951.5	6387.3	8828	6387.3	7929.6	9866.4	4461.2	8701.1	8953.4	8452.4	9218.5	9450.3		11390.8	11289.6	22.4	26	12838.4	13152.4	29.9	30	7992.6	8421.8	7648.5	6499.1	9376.3	3948.5	9472	3997.5		7698.5	9866.4		6387.3	9450.3		11390.8	7648.5		10434.4	7648.5
2275.5	3680.1	9921.6	10038.8	9921.6	5627.8	10038.8	5627.8	7895.4	9423	6554.3	7946.3	3474.6	8269.3	9882.5	9447.9		9836.3	9692	26.9	26.2	7330.2	9226.4	30	27.4	11557	11656.4	11534.8	9450	10707.8	3944.2	8249.2	3989.7		3680.1	9423		5627.8	9447.9		9836.3	11534.8		10465.7	11534.8
1950	2767	7538.6	7303	7538.6	4664.9	7303	4664.9	7927.3	9492.3	9380.6	8182.9	9633.7	8268.1	10074.7	9411.6		14956.6	14700.2	28.3	26.4	6524.5	7877.3	30.1	25	13664.1	14573.2	12682.7	11697.2	13762	3924.2	8466.1	3948.5		2767	9492.3		4664.9	9411.6		14956.6	12682.7		15075.9	12682.7
2486.3	3384.2	9645.5	9344.1	9645.5	4782.3	9344.1	4782.3	7659	9580.8	9264.4	9358.3	11203.5	8163.2	9594.6	9398.3		14982.8	14522.4	28.2	26.9	6850.6	7321.6	30.5	28.6	9880	10658.5	9191.9	7942.2	9055.9	3905.6	9123	3944.2		3384.2	9580.8		4782.3	9398.3		14982.8	9191.9		20951.4	9191.9
3338.8	5210.8	8882.7	8477.6	8882.7	6175.6	8477.6	6175.6	8011.8	10037.9	5498.8	8128.6	3397.7	8152.7	7918.7	9357		10909.7	10298.4	30.8	26.9	8023.7	9349.6	30.6	30.3	10808.9	11068.8	10414.6	9031.9	11941.2	3876.2	11362.9	3924.2		5210.8	10037.9		6175.6	9357		10909.7	10414.6		9357.9	10414.6
7170.9	8492.9	9993.1	9872	9993.1	6986.7	9872	6986.7	8110.6	10050.4	9113.6	9050.6	9625.5	8149.8	9947.5	9266.9		14544.1	14364.9	28.2	27.2	12170.4	15023.9	30.6	25.3	8976.3	9402.4	7936.3	6538.5	11344.8	3839	4923	3905.6		8492.9	10050.4		6986.7	9266.9		14544.1	7936.3		13066.8	7936.3
5793.2	7124.5	8694	8426.9	8694	6034.4	8426.9	6034.4	7702.1	9283.2	8215.7	8628.9	8829	8076.6	9686.5	9070.5		9280.7	9094.9	23.1	27.4	5935.9	6559.2	31.1	17.1	11020.2	11138.5	11425	9633.9	2702	3838.6	10304.3	3876.2		7124.5	9283.2		6034.4	9070.5		9280.7	11425		9833	11425
7494.7	9392.8	10797.3	10837.8	10797.3	7731.3	10837.8	7731.3	7968.2	9764.6	5367.4	8606.3	6204.7	8072.1	9614.9	9017.7		8382.4	8047.1	18.9	27.7	9725.4	11304	31.4	29	9181.3	9535.6	8701.5	7287.1	3014.7	3834.4	9917	3839		9392.8	9764.6		7731.3	9017.7		8382.4	8701.5		8217.4	8701.5
6170.1	8356.6	11833.9	11604.8	11833.9	8252.1	11604.8	8252.1	7956.1	9647.6	8871.3	8655.2	8527.8	8035.4	8708.6	8889.5		7754.4	7235.4	30.5	27.8	8859.3	10918.3	31.6	26.7	7763.6	8638.5	7120.8	6390.8	8217.9	3819	1898.5	3838.6		8356.6	9647.6		8252.1	8889.5		7754.4	7120.8		8619.6	7120.8
2559.1	5490.3	8815.4	6870.2	8815.4	5228.1	6870.2	5228.1	10877.5	13585.1	7991.8	8539	6180.5	7928.4	8867.7	8863.1		10189.4	9932.2	28.8	27.9	6569.7	7961	31.9	28.8	9965.3	10371.3	9048.4	7756.2	5301.1	3780.2	2421.9	3834.4		5490.3	13585.1		5228.1	8863.1		10189.4	9048.4		9305.1	9048.4
6092.7	7331.3	8788.4	8548	8788.4	6208.3	8548	6208.3	7606.3	9164.9	8953.4	8268	3917.2	7925.7	8871.9	8798.4		15297.3	14783.8	31.2	28.3	6160.6	7499.8	31.9	33.2	15144.4	15508.1	13976.7	12329.1	11302	3766.9	6903.7	3819		7331.3	9164.9		6208.3	8798.4		15297.3	13976.7		16316.2	13976.7
1872.2	2707.2	7976.6	7268.6	7976.6	3607.2	7268.6	3607.2	8873.9	10868.8	3474.6	7758.4	7973.5	7917.9	8701.1	8795		7090.4	6853.3	27.8	28.8	7025.3	9076.4	32.1	38	6957	7112	7146.9	6065.5	5537.1	3707.9	4722.9	3780.2		2707.2	10868.8		3607.2	8795		7090.4	7146.9		6998.6	7146.9
2012.5	4140.3	10317	9480.5	10317	5845.7	9480.5	5845.7	8985.7	11114.1	9633.7	9101.2	6727.3	7788	7946.3	8793.1		12481.4	12013.2	28	28.8	26236.6	27720.4	32.2	33.4	10535.2	11447.3	9754.4	8508.2	265.9	3693.6	9547	3766.9		4140.3	11114.1		5845.7	8793.1		12481.4	9754.4		12542.5	9754.4
7657.7	8680.2	10860	10465.8	10860	7327.5	10465.8	7327.5	7319.5	9279.6	11203.5	10289.2	7409.1	7730.9	8182.9	8764.9		11976.3	11671.1	19.5	29	21893.6	24808.8	32.5	28.8	12002.2	12146	11365	9472	8509.7	3688.8	4766.1	3707.9		8680.2	9279.6		7327.5	8764.9		11976.3	11365		11002.5	11365
5572.8	7236.5	9859.2	9674.4	9859.2	6841.9	9674.4	6841.9	8262.4	9824.1	3397.7	7694.7	8052.1	7729.5	9358.3	8756.7		8067.1	7855.6	23.7	29.9	8783.6	11225.7	33.3	28.8	9862.3	10262.8	9480.3	8249.2	5303.1	3686.5	154.7	3693.6		7236.5	9824.1		6841.9	8756.7		8067.1	9480.3		8235	9480.3
2245.9	3567.8	9014.5	9319.6	9014.5	5116	9319.6	5116	7331.8	8930.3	9625.5	9607.1	8597.7	7704.7	8128.6	8746.9		7361.7	7222.1	24.6	29.9	8793.7	11270.5	33.4	31.2	8787.5	9005.6	9376.3	8466.1	6716.6	3676.1	7099.9	3688.8		3567.8	8930.3		5116	8746.9		7361.7	9376.3		10330.8	9376.3
5625.8	7142.4	8321.8	8284.6	8321.8	5973.1	8284.6	5973.1	7672.3	9281.9	8829	8211.7	8635.9	7703.4	9050.6	8705.1		9196.4	8857.2	30	30	8975	6675.8	33.7	28.2	10688.2	10360.7	10707.8	9123	9369.1	3670.4	4949.7	3686.5		7142.4	9281.9		5973.1	8705.1		9196.4	10707.8		9923.9	10707.8
4010.2	5258.3	8121.1	8151.2	8121.1	5757.6	8151.2	5757.6	7387.7	9121.6	6204.7	7177.2	8338.5	7652.9	8628.9	8614.8		30003.8	30867	42.5	30.1	6365.4	4525.8	33.9	22.3	17485.5	17829.3	13762	11362.9	7687.3	3669.1	6260	3676.1		5258.3	9121.6		5757.6	8614.8		30003.8	13762		28752.7	13762
1205.2	2149.3	4828.7	3841.5	4828.7	2962.2	3841.5	2962.2	10428.2	12918.5	8527.8	8152.5	7770.8	7570.9	8606.3	8599.6		38440.2	50994.6	30	30.1	6617.8	7706.9	34	32.6	9363.6	9478.1	9055.9	4923	11080.2	3667.8	7874.1	3670.4		2149.3	12918.5		2962.2	8599.6		38440.2	9055.9		109933	9055.9
6046	7480.5	9134.5	8854.8	9134.5	6225.6	8854.8	6225.6	7375.8	9003	6180.5	7324	3187.2	7504.9	8655.2	8492.6		11485.8	11045.9	24.6	30.5	9398.2	11636.4	34	28.8	12380.2	12057.7	11941.2	10304.3	6037.2	3645.9	6961.4	3669.1		7480.5	9003		6225.6	8492.6		11485.8	11941.2		11355.2	11941.2
3615.6	4740.8	7954.2	7609.5	7954.2	5186.3	7609.5	5186.3	7008.6	8532.4	3917.2	7503.7	6843.6	7496.5	8539	8487.3		11215.4	11296.5	30.3	30.6	202	184.6	34.2	30	11891.9	12525.9	11344.8	9917	5163.3	3642.7	9033.7	3667.8		4740.8	8532.4		5186.3	8487.3		11215.4	11344.8		11137.2	11344.8
5483.5	6485.5	8358.1	8375.6	8358.1	6008.3	8375.6	6008.3	7139.4	8651.8	7973.5	8274.4	8089.3	7458.6	8268	8452.4		7328.3	9154.4	27.8	30.6	9119.1	10890.8	34.3	25.1	2542.1	2226.2	2702	1898.5	8916.8	3612.2	5044.3	3645.9		6485.5	8651.8		6008.3	8452.4		7328.3	2702		8559.3	2702
1877.8	2563.6	6994	7116.7	6994	3325	7116.7	3325	7539.3	8696.1	6727.3	7582.1	7993.5	7446.8	7758.4	8269.3		5225.8	6202.1	22.5	30.8	16311.6	14199.1	34.6	15	2553.3	2758.1	3014.7	2421.9	7288.7	3541.6	4062.1	3642.7		2563.6	8696.1		3325	8269.3		5225.8	3014.7		5316.1	3014.7
7755.9	8796.6	9342.3	9473.6	9342.3	6621.5	9473.6	6621.5	7218.7	8850.7	7409.1	8017.6	8014.2	7446.7	9101.2	8268.1		8440.7	8170.7	21.3	31.1	5075	6672.7	35	31.2	8440	8789.6	8217.9	6903.7	6143.2	3530.8	7991.3	3612.2		8796.6	8850.7		6621.5	8268.1		8440.7	8217.9		7980.2	8217.9
8199.5	10491.5	10550.5	10050	10550.5	7427.1	10050	7427.1	7549.7	9017.2	8052.1	7653.6	7731.6	7443	10289.2	8163.2		22128.8	27104.8	37	31.1	6798.6	8086.5	35.3	9.3	5547.9	6052.3	5301.1	4722.9	9776.7	3482.8	6466.5	3541.6		10491.5	9017.2		7427.1	8163.2		22128.8	5301.1		22918.9	5301.1
1220.9	1992.9	7325.4	7270.2	7325.4	3349.8	7270.2	3349.8	7275.8	8771.9	8597.7	8612.8	6729.2	7442.7	7694.7	8152.7		12334.8	12041.3	24.9	31.4	4932.8	6261.3	36.2	28.6	12499.7	12930.4	11302	9547	9128.1	3462.4	5236.1	3530.8		1992.9	8771.9		3349.8	8152.7		12334.8	11302		11244.3	11302
3674.6	4897.5	6414.7	6742.8	6414.7	4807.5	6742.8	4807.5	7651.4	9544.2	8635.9	8492.8	7626.8	7377.3	9607.1	8149.8		27340.9	38934.6	21.8	31.6	9588.8	10468.7	36.3	38.9	5880.8	5799.8	5537.1	4766.1	6512.8	3457.6	7367.8	3482.8		4897.5	9544.2		4807.5	8149.8		27340.9	5537.1		32222.6	5537.1
5845.6	6418.5	7812.9	7675.9	7812.9	5615.5	7675.9	5615.5	6702.9	8314.8	8338.5	8255.1	8115.8	7371.3	8211.7	8076.6		429.2	393.1	26.6	31.6	16219.2	13431.8	36.9	12	128.2	193.8	265.9	154.7	4846.4	3429.6	7701.4	3462.4		6418.5	8314.8		5615.5	8076.6		429.2	265.9		493.7	265.9
2522.6	3640.6	7799.8	7615.6	7799.8	5016.9	7615.6	5016.9	6715.4	8332.2	7770.8	8018	6909.1	7345.5	7177.2	8072.1		11189.6	11169.5	25.2	31.9	6244.2	5981.4	37	33.7	9510.4	10311.6	8509.7	7099.9	9165.6	3407.1	5041	3457.6		3640.6	8332.2		5016.9	8072.1		11189.6	8509.7		10482	8509.7
5852.7	7284.1	9236.5	8913	9236.5	6367.2	8913	6367.2	6832.3	8328.2	3187.2	6958.1	7510.5	7289.7	8152.5	8035.4		15162.5	16331.4	36.3	31.9	7581.9	9123.8	37	31.1	6439	7183.1	5303.1	4949.7	3439.1	3398.4	3862	3429.6		7284.1	8328.2		6367.2	8035.4		15162.5	5303.1		15961.3	5303.1
1250.9	2984.9	5299.6	5240.3	5299.6	4223.4	5240.3	4223.4	6769.6	8806.9	6843.6	7661.5	3019.4	7253.7	7324	7928.4		6860.7	6452.2	29.1	31.9	6532.8	7475	37.1	29.7	6800.5	7301.6	6716.6	6260	11688.8	3369.7	8021.3	3407.1		2984.9	8806.9		4223.4	7928.4		6860.7	6716.6		7996	6716.6
1690.7	2433.7	7513.2	7462.4	7513.2	3547.3	7462.4	3547.3	6818.3	8156.4	8089.3	7823.8	5253.1	7217.5	7503.7	7925.7		8779.1	8727.2	34.6	32.1	5447.3	6318.7	37.5	16.5	9798.5	9477.2	9369.1	7874.1	6451.6	3366.3	2591.8	3398.4		2433.7	8156.4		3547.3	7925.7		8779.1	9369.1		8353.3	9369.1
3802.7	5274.1	7211.3	7076.7	7211.3	5285.9	7076.7	5285.9	6898.5	8334.4	7993.5	7911.9	8067.7	7164.5	8274.4	7917.9		6406.8	6053	45.5	32.1	8128.6	9069.4	37.6	49.3	8108.4	8664.7	7687.3	6961.4	12829.4	3356.7	9721.5	3369.7		5274.1	8334.4		5285.9	7917.9		6406.8	7687.3		6069.8	7687.3
2790.1	3809.9	6101.5	6165.2	6101.5	4572.6	6165.2	4572.6	6404.7	7877.7	8014.2	7564.5	7226.4	7153.7	7582.1	7788		11364	11323.2	36.5	32.2	5884.6	7889.2	37.7	34.5	11190.1	10490.2	11080.2	9033.7	8615.5	3346.4	5821.6	3366.3		3809.9	7877.7		4572.6	7788		11364	11080.2		10709.6	11080.2
3168.3	3721.9	4630.5	4625.1	4630.5	3561.3	4625.1	3561.3	6412.5	7839.1	7731.6	7495.6	7885.9	7109.5	8017.6	7730.9		14289	15940.1	26.6	32.5	5005.2	5093.8	37.8	23.6	6582.4	6484.7	6037.2	5044.3	8175.4	3345.3	11655.3	3356.7		3721.9	7839.1		3561.3	7730.9		14289	6037.2		13804.6	6037.2
5522.6	6478.9	7598.9	7485.4	7598.9	5668.1	7485.4	5668.1	6441.2	7936.7	6729.2	7475.7	7181.1	7104.9	7653.6	7729.5		6810.9	6786.8	30.4	32.6	7773.8	9167.5	38	27.2	4832.6	5202.3	5163.3	4062.1	4338.1	3320.8	7290.9	3346.4		6478.9	7936.7		5668.1	7729.5		6810.9	5163.3		5987.4	5163.3
5140.3	7058	8795.2	9033.7	8795.2	6119.9	9033.7	6119.9	6797.3	8252.9	7626.8	7386.7	6760.2	7077.1	8612.8	7704.7		8662.5	8628.6	23.6	33.3	2829.2	2543.5	38.8	41.7	9099.6	9162.7	8916.8	7991.3	5163.6	3300.5	6889.6	3345.3		7058	8252.9		6119.9	7704.7		8662.5	8916.8		9471.2	8916.8
5807.3	7149.3	7757.7	7770.5	7757.7	5614.4	7770.5	5614.4	6821	8336.2	8115.8	7723	7855.1	7065.3	8492.8	7703.4		7604.6	7677	25	33.4	9684.5	10383.1	38.9	36.4	7679.1	8319.8	7288.7	6466.5	6404.2	3293.7	3192.6	3320.8		7149.3	8336.2		5614.4	7703.4		7604.6	7288.7		7471.3	7288.7
5830.5	7329.5	9631.7	9375	9631.7	6530.3	9375	6530.3	6697.4	8142.5	6909.1	6241.7	7013.4	7002.4	8255.1	7652.9		6983.4	6674.9	36.1	33.7	10465.4	9797.1	39.3	35.8	6370.3	6666.6	6143.2	5236.1	10167.8	3285.6	4311.8	3300.5		7329.5	8142.5		6530.3	7652.9		6983.4	6143.2		6101.1	6143.2
4578.3	5984.1	6070.6	6138.6	6070.6	4755.6	6138.6	4755.6	6594.2	8215.2	7510.5	7139.3	6507.3	6971	8018	7570.9		10037.3	10296.5	30.4	34	10680.7	12017.7	40.3	40.9	9496.1	9269	9776.7	7367.8	7461.1	3280.7	5715.2	3293.7		5984.1	8215.2		4755.6	7570.9		10037.3	9776.7		8953.2	9776.7
1581.6	2221.8	6640.5	6617.2	6640.5	3035.3	6617.2	3035.3	6743.3	7890.5	3019.4	6464.5	6441.4	6937.4	6958.1	7504.9		8173.6	7676.2	29.1	34	9624.8	10276.4	40.6	40.6	9274.2	9699.7	9128.1	7701.4	4809.6	3267.4	8803.8	3285.6		2221.8	7890.5		3035.3	7504.9		8173.6	9128.1		9316.3	9128.1
3559.5	5071.4	8082.6	8284.4	8082.6	5587.5	8284.4	5587.5	6136.1	7265.4	5253.1	7422.4	5370.1	6924.9	7661.5	7496.5		17571.6	26585.4	29.4	34.2	8668.8	9985.1	41.3	36.8	6124.2	6319.1	6512.8	5041	7180.4	3263.2	6515.4	3280.7		5071.4	7265.4		5587.5	7496.5		17571.6	6512.8		20657	6512.8
5719.4	6842.5	8468.7	8243.6	8468.7	5872.2	8243.6	5872.2	6239.6	7578.9	8067.7	7238.6	7260.3	6893	7823.8	7458.6		6034	5867.8	29.2	34.3	5766.5	5897.2	41.4	44.5	4530.6	4809.8	4846.4	3862	2502.6	3228.5	4464.3	3267.4		6842.5	7578.9		5872.2	7458.6		6034	4846.4		5383.9	4846.4
4530	6150.4	7923.9	7757.3	7923.9	5568.8	7757.3	5568.8	6328.4	7661.7	7226.4	6980.7	7105.8	6866.8	7911.9	7446.8		9881.9	9756.7	37.7	34.5	7652.9	7851.9	41.5	38.8	10055.9	10630.4	9165.6	8021.3	4980.4	3225.8	6404.6	3263.2		6150.4	7661.7		5568.8	7446.8		9881.9	9165.6		9125.2	9165.6
5033.3	6513.7	7806.7	7699.6	7806.7	5794.1	7699.6	5794.1	6331.2	7917.9	7885.9	7352	7610.7	6838.1	7564.5	7446.7		2687.2	2988.8	12.9	34.6	7347.2	7584.5	42.1	42.3	2632.7	2763.4	3439.1	2591.8	6485.7	3214.1	2029.9	3228.5		6513.7	7917.9		5794.1	7446.7		2687.2	3439.1		3505.7	3439.1
5285.8	6535	7711.6	7661.5	7711.6	5533.6	7661.5	5533.6	6626.7	8004.7	7181.1	7653.1	7868.4	6692.7	7495.6	7443		11300.1	10913.8	22.2	35	8046.5	9468.7	42.5	33	12455.2	11771.1	11688.8	9721.5	4170.4	3195.7	4111.3	3225.8		6535	8004.7		5533.6	7443		11300.1	11688.8		10013	11688.8
3409.6	4050.2	5444.4	5459.3	5444.4	4416	5459.3	4416	6184.7	7657.2	6760.2	6739.9	7170.2	6691.7	7475.7	7442.7		9885	10267.7	8.4	35.3	8164.8	8165.1	42.7	30.3	7099.3	7887.9	6451.6	5821.6	6508.2	3194.6	5426.1	3214.1		4050.2	7657.2		4416	7442.7		9885	6451.6		10155.2	6451.6
5587.8	6983.4	8121	7979.9	8121	5816.7	7979.9	5816.7	6253.5	7629.1	7855.1	7162.5	6748.8	6687.4	7386.7	7377.3		12625.1	12147	24	36.2	5216.2	5770.7	42.9	43.8	12467.9	13278.2	12829.4	11655.3	7055.8	3194.2	2205.3	3195.7		6983.4	7629.1		5816.7	7377.3		12625.1	12829.4		15459.8	12829.4
6625.2	7733.1	9142.5	8883.5	9142.5	6258.4	8883.5	6258.4	6416.8	7792.5	7013.4	6887.9	7232.3	6672.1	7723	7371.3		10152.8	10118.9	29.8	36.2	6763.1	7625.6	43	34	9128	9553.7	8615.5	7290.9	5646.1	3189.1	5819.5	3194.6		7733.1	7792.5		6258.4	7371.3		10152.8	8615.5		13195.5	8615.5
2482.3	3607.8	5147.4	5026.1	5147.4	4266.3	5026.1	4266.3	5767.8	7494.3	6507.3	7327.5	6918.6	6671	6241.7	7345.5		11151.7	10689.8	36	36.3	1846.3	1993.7	43	42.6	8664	9192.1	8175.4	6889.6	5202	3185.1	5800.4	3194.2		3607.8	7494.3		4266.3	7345.5		11151.7	8175.4		11169	8175.4
5888.8	7317.2	8880.2	8686.1	8880.2	6163.4	8686.1	6163.4	6386.6	7914.4	6441.4	7047.4	7064.6	6664.8	7139.3	7289.7		6658.1	6905.6	5.1	36.9	3340	4138.2	43.2	25.6	4597.4	3591.3	4338.1	3192.6	9503.9	3133.1	4694.5	3189.1		7317.2	7914.4		6163.4	7289.7		6658.1	4338.1		5905.6	4338.1
1434.8	2068.3	6127.5	6370.6	6127.5	2793.5	6370.6	2793.5	6215.3	7414.4	5370.1	6838.8	5241.9	6659	6464.5	7253.7		8248.4	8193	21.6	37	10419.5	11335.4	44	6.6	6176.9	6717.8	5163.6	4311.8	6830.2	3125.7	4743.9	3185.1		2068.3	7414.4		2793.5	7253.7		8248.4	5163.6		7748.7	5163.6
2239.6	3194.2	7621.9	7589.9	7621.9	4036.8	7589.9	4036.8	6344.3	7565.9	7260.3	7153.9	6754.9	6639.3	7422.4	7217.5		8259.2	7918.6	26.1	37.1	1520.3	1734.7	44.5	23.6	6813.4	7639.8	6404.2	5715.2	7775.7	3124.8	8140.9	3133.1		3194.2	7565.9		4036.8	7217.5		8259.2	6404.2		7234.6	6404.2
5259.3	6116.6	6669.4	6633.1	6669.4	5216.5	6633.1	5216.5	5987.2	7369.9	7105.8	7431.3	7205.2	6580.5	7238.6	7164.5		9311.4	9253.2	14	37.5	6619.3	7884.3	44.6	52.1	10243.1	9929.4	10167.8	8803.8	9343.8	3117.6	5471	3125.7		6116.6	7369.9		5216.5	7164.5		9311.4	10167.8		10407.6	10167.8
3600.5	5429.5	6808.3	6938.4	6808.3	4902.6	6938.4	4902.6	6117.3	7387.2	7610.7	7091.1	7016.9	6541	6980.7	7153.7		8591.4	8736.9	39.8	37.6	14375.7	14634.2	44.9	48.4	8038.8	8347.1	7461.1	6515.4	8486.5	3099.8	6697.2	3124.8		5429.5	7387.2		4902.6	7153.7		8591.4	7461.1		7437.1	7461.1
4567.4	6372.7	7274.7	7063.8	7274.7	5173.9	7063.8	5173.9	5954.2	7222.2	7868.4	7226.4	7234.3	6523.6	7352	7109.5		6340.6	6051.3	5.9	37.8	5051.7	5052.8	45.4	39.2	5244.9	5752.1	4809.6	4464.3	6295	3093.3	8186.3	3117.6		6372.7	7222.2		5173.9	7109.5		6340.6	4809.6		5952.7	4809.6
3019.3	3630.7	6847.5	6667.6	6847.5	3978.5	6667.6	3978.5	6142.3	7454	7170.2	6881.4	6955.4	6507.5	7653.1	7104.9		7632.8	7374.1	21.3	38	5073.3	5934.7	45.5	31.1	7559.7	8372.4	7180.4	6404.6	8361.7	3090	7469.6	3099.8		3630.7	7454		3978.5	7104.9		7632.8	7180.4		7469.4	7180.4
4111	5014.8	5965.9	5778.2	5965.9	4418.9	5778.2	4418.9	5843.8	7159.2	6748.8	6125.2	6732.1	6505.5	6739.9	7077.1		2234.9	2132.6	38.4	38.4	12027.6	12408.6	45.5	32.1	2106.2	2431.3	2502.6	2029.9	5662.2	3079.2	5452	3093.3		5014.8	7159.2		4418.9	7077.1		2234.9	2502.6		2498.3	2502.6
5057.5	6419.1	7612.8	7374.9	7612.8	5298	7374.9	5298	5851.1	7316.9	7232.3	6736.1	6883.3	6489	7162.5	7065.3		4433	4214.1	33.8	38.8	7981.3	8379	46.5	20.3	4587.8	4989.6	4980.4	4111.3	6543.4	3072	6983.7	3090		6419.1	7316.9		5298	7065.3		4433	4980.4		4863.5	4980.4
4080.8	5045.9	5837.7	5778.9	5837.7	4560.9	5778.9	4560.9	5740.2	7191.8	6918.6	6856.1	6130	6475.6	6887.9	7002.4		10135.4	12720.1	35	38.9	12220.2	13185.3	46.5	36.6	7367.9	8363.2	6485.7	5426.1	6665	3042	4676.2	3079.2		5045.9	7191.8		4560.9	7002.4		10135.4	6485.7		17643.7	6485.7
2804.5	3702	5656.3	5549.1	5656.3	3922.2	5549.1	3922.2	5878.2	7068.6	7064.6	6731.3	7166	6369.2	7327.5	6971		2592.2	2842.6	33.6	39.3	7736.6	9625.7	47	58.1	2966.2	3089.1	4170.4	2205.3	6430.1	3037.3	5390.8	3072		3702	7068.6		3922.2	6971		2592.2	4170.4		21950.2	4170.4
2675.5	3531.3	6162	6006	6162	3907	6006	3907	5869.7	7125.6	5241.9	6873.8	3676.2	6365.7	7047.4	6937.4		8425.1	8383.2	39.7	40.3	11155.3	11435.9	47.2	38.4	7115.6	7785.2	6508.2	5819.5	11187	2994.8	5733.5	3042		3531.3	7125.6		3907	6937.4		8425.1	6508.2		8862.4	6508.2
2593.3	3415.9	6081.5	6090.3	6081.5	4075.7	6090.3	4075.7	5828.4	7259.1	6754.9	7289	6756.9	6340	6838.8	6924.9		15993	16814.8	40.1	40.6	7326.9	7609.5	47.6	45.4	7909.4	8399.6	7055.8	5800.4	9089	2973.5	5600.8	3037.3		3415.9	7259.1		4075.7	6924.9		15993	7055.8		15931.4	7055.8
4751.8	5622.9	6550.4	6423	6550.4	4681.1	6423	4681.1	5855.6	7240.9	7205.2	6856.3	7095.6	6337.3	7153.9	6893		5840.2	5482.3	32.6	41.3	6411.5	7140.6	47.7	13.8	5315.1	5766.4	5646.1	4694.5	1096.5	2965.3	9959.1	2994.8		5622.9	7240.9		4681.1	6893		5840.2	5646.1		5539	5646.1
3641.7	5123	7138.4	6819.2	7138.4	4991.8	6819.2	4991.8	6140.2	7459.2	7016.9	6729.5	5249.6	6319.4	7431.3	6866.8		6475.5	5899.1	32.2	41.4	11631.6	10464.6	48.1	42.3	5683.5	6226.4	5202	4743.9	3783.3	2948.4	7941.5	2973.5		5123	7459.2		4991.8	6866.8		6475.5	5202		8504.5	5202
5849.4	7045.3	8044.1	7958.8	8044.1	5591	7958.8	5591	5978.1	7492.9	7234.3	6772.8	6704.6	6296.6	7091.1	6838.1		13921.2	13736.9	34	41.5	4623.8	5673.6	48.3	22.1	11118	11545.4	9503.9	8140.9	4670.7	2882.5	887.9	2965.3		7045.3	7492.9		5591	6838.1		13921.2	9503.9		12388.8	9503.9
5497.7	6285.5	7351.2	7152.9	7351.2	5308.6	7152.9	5308.6	5749.3	7221	6955.4	6432.1	3308.3	6280.3	7226.4	6692.7		9431.8	9235.1	42.1	42.3	8351.3	8716.1	48.4	25.5	7434.5	7639.1	6830.2	5471	7596.4	2878.1	3410.1	2948.4		6285.5	7221		5308.6	6692.7		9431.8	6830.2		9509.3	6830.2
4486.8	5362.2	6640.1	6549.3	6640.1	4828.6	6549.3	4828.6	5552.5	6788.1	6732.1	6741.2	2661	6233.5	6881.4	6691.7		13903	13702.6	31.6	42.5	5488.1	6626.4	48.6	40.5	9849.9	10221.6	7775.7	6697.2	4497.1	2863.8	3984.6	2882.5		5362.2	6788.1		4828.6	6691.7		13903	7775.7		12566.8	7775.7
3988.9	4687.4	5852.7	5787.7	5852.7	4533.3	5787.7	4533.3	5475.9	6619.9	6883.3	6725.8	6452.1	6222.7	6125.2	6687.4		10483	9870.7	26.6	42.7	9403.5	10951.2	49.7	35	10213.2	10551.2	9343.8	8186.3	3418.2	2855.5	6594.8	2878.1		4687.4	6619.9		4533.3	6687.4		10483	9343.8		9385.1	9343.8
4600.5	5910.7	6951.3	6862.8	6951.3	5075.8	6862.8	5075.8	5691.5	6778.7	6130	6838.3	6405.8	6215.2	6736.1	6672.1		11788.9	11793	33.1	42.9	7664	9239.3	49.7	44.4	9390.3	10072.1	8486.5	7469.6	4826.4	2845.3	3912.3	2863.8		5910.7	6778.7		5075.8	6672.1		11788.9	8486.5		11032	8486.5
3619.1	5058.9	6324	6237.3	6324	4712	6237.3	4712	5399.4	6627	7166	6721.2	6451.9	6127.4	6856.1	6671		7995.8	7924.7	35.7	43	810	818.9	49.8	64.2	7406.4	7662.3	6295	5452	9097.4	2840.7	2890.6	2855.5		5058.9	6627		4712	6671		7995.8	6295		7868.6	6295
3909.1	4959	6106.8	6024.1	6106.8	4320.8	6024.1	4320.8	5625.9	6855.7	3676.2	5660.9	6121.5	6117.5	6731.3	6664.8		7686	7575.6	38.3	43	3113.1	3823.9	50	34	8327.9	8252.9	8361.7	6983.7	5785.6	2827	3985.9	2845.3		4959	6855.7		4320.8	6664.8		7686	8361.7		6785.7	8361.7
1534.4	3202.2	5290.1	4067.2	5290.1	3403.6	4067.2	3403.6	8716.7	10884.5	6756.9	7179.5	4473.4	6112.5	6873.8	6659		10833.5	12406.3	21.5	43.2	8380.7	7858.4	50.1	46.9	6386.4	6575.8	5662.2	4676.2	6052.1	2820.8	7897.2	2840.7		3202.2	10884.5		3403.6	6659		10833.5	5662.2		11064.5	5662.2
2761.4	4126.8	7207.3	6856.7	7207.3	4651.4	6856.7	4651.4	5693.6	6671.5	7095.6	6887.1	3409.2	6098.3	7289	6639.3		5716.9	5804.7		44	6885.2	8073.4	50.8	39.5	6389	6333.2	6543.4	5390.8	3929.8	2816.3	5035.7	2827		4126.8	6671.5		4651.4	6639.3		5716.9	6543.4		6116.1	6543.4
4400.5	5211.9	6350.5	6396.1	6350.5	4694.4	6396.1	4694.4	5519.9	6925.8	5249.6	6752.6	6084.3	6095.5	6856.3	6580.5		9086.7	9289.4	15.4	44.5	9418.1	9144	50.8	37.4	7078.8	7639.1	6665	5733.5	5802.6	2814.4	5440.1	2820.8		5211.9	6925.8		4694.4	6580.5		9086.7	6665		8708.3	6665
5060.6	5792.2	7386.5	7285.1	7386.5	5129.6	7285.1	5129.6	5557.4	6774.1	6704.6	6553	5064.8	6057.8	6729.5	6541		7038.9	6650.5	33.5	44.6	2601.8	2831.5	51.8	33.8	7311	7540.3	6430.1	5600.8	6339.3	2808.7	3343.9	2816.3		5792.2	6774.1		5129.6	6541		7038.9	6430.1		6359.1	6430.1
5432.9	6288.3	7704.1	7411.4	7704.1	5393.9	7411.4	5393.9	5768.3	7160.1	3308.3	6213.3	5828.7	6043.1	6772.8	6523.6		11008.8	10808.5	44.4	44.9	7705.3	7074	53.1	53.7	10625.6	10696.6	11187	9959.1	4825.4	2804	4994.6	2814.4		6288.3	7160.1		5393.9	6523.6		11008.8	11187		11022.8	11187
5467.1	6063.9	6737.8	6488	6737.8	4885.1	6488	4885.1	5523.6	6706.4	2661	5576.8	6548.3	6038.3	6432.1	6507.5		9753.8	9660.9	38.2	45.4	5853.3	7281.7	53.1	45.4	9904	10210.9	9089	7941.5	7739.2	2786.5	5712.3	2808.7		6063.9	6706.4		4885.1	6507.5		9753.8	9089		8915.6	9089
4303.2	4694.2	4762.5	4649.5	4762.5	4238.6	4649.5	4238.6	5201.7	6710.3	6452.1	6277.2	6284.7	6028	6741.2	6505.5		964.7	1009.6	19.3	45.5	6100.2	6872.1	53.4	51.9	988.1	1073.9	1096.5	887.9	7168.4	2778.4	4072.9	2804		4694.2	6710.3		4238.6	6505.5		964.7	1096.5		1866.1	1096.5
4923.3	6314.8	7423.5	7125.4	7423.5	5298.6	7125.4	5298.6	5576.6	6802.1	6405.8	6120.4	6651.6	6008.6	6725.8	6489		3998.3	3755.8	26.3	46.5	4437.8	5359.1	53.8	45.4	3835.4	4305.8	3783.3	3410.1	5777.8	2773.4	6303.3	2786.5		6314.8	6802.1		5298.6	6489		3998.3	3783.3		4222.6	3783.3
3262.6	4117.6	5830.3	5861.7	5830.3	4477.7	5861.7	4477.7	5520.3	6586.1	6451.9	6289.5	5699.9	6002.5	6838.3	6475.6		8386	8504.7	34.9	46.5	6011.2	6409.8	54.8	58.9	4960.7	5525.8	4670.7	3984.6	6163.3	2772	6118.6	2778.4		4117.6	6586.1		4477.7	6475.6		8386	4670.7		7300.3	4670.7
3456.6	4850	5120.3	4940.1	5120.3	4062.1	4940.1	4062.1	5171.5	6345.6	6121.5	6583.7	6159.5	6000.8	6721.2	6369.2		8801	8265.8	43.2	47	3938.2	4941.6	55.2	63.2	8107.6	8875.9	7596.4	6594.8	10049.5	2768.7	4795.8	2773.4		4850	6345.6		4062.1	6369.2		8801	7596.4		7758.8	7596.4
1489.8	2581.7	6800.7	6602.5	6800.7	3406.4	6602.5	3406.4	5535.5	6619.6	4473.4	6006	6328.7	5974.8	5660.9	6365.7		10281.7	9781.5	44	47.2	5733.1	6250.3	55.3	53.9	4920.6	5445.9	4497.1	3912.3	5395.3	2753.5	5161.4	2772		2581.7	6619.6		3406.4	6365.7		10281.7	4497.1		9286.6	4497.1
3622.9	4349.8	5772	5623	5772	3881.5	5623	3881.5	5487.7	6592.3	3409.2	5789.8	3812.8	5952.3	7179.5	6340		2821.7	2917.8	30.2	47.6	4278.7	5038.3	55.6	45.8	2942.7	3149.1	3418.2	2890.6	4894.6	2750.2	8500.3	2768.7		4349.8	6592.3		3881.5	6340		2821.7	3418.2		3333.3	3418.2
3676.8	4702.4	6301	6255.9	6301	4389.5	6255.9	4389.5	5313.3	6335.7	6084.3	6113	3411.8	5932.5	6887.1	6337.3		7614.8	7746.5	6.8	47.7	6079.8	7089.5	55.9	62.6	5094	5331.9	4826.4	3985.9	4950.6	2744.2	4487.2	2753.5		4702.4	6335.7		4389.5	6337.3		7614.8	4826.4		6936.8	4826.4
1897.7	2568	5851	5862.2	5851	3409	5862.2	3409	5433.2	6603.9	5064.8	6050.4	6394.6	5930.3	6752.6	6319.4		7348	7204.8	32.1	48.1	6884.1	7386.9	56.4	42.3	9385.8	9870.9	9097.4	7897.2	12349.4	2743	4353.1	2750.2		2568	6603.9		3409	6319.4		7348	9097.4		7427.2	9097.4
5465.1	6340.5	7660.1	7377.8	7660.1	5386.6	7377.8	5386.6	5755.7	6865.1	5828.7	7828	6554.4	5904.7	6553	6296.6		7276.7	7222.6	43.6	48.6	9365.4	9860	56.7	41.4	6031.6	6459	5785.6	5035.7	6136.5	2726.4	4129.6	2744.2		6340.5	6865.1		5386.6	6296.6		7276.7	5785.6		10024.6	5785.6
1348	1946.9	6237.2	6193.3	6237.2	3210.3	6193.3	3210.3	5406.5	6569.8	6548.3	6424	5692.3	5903.5	6213.3	6280.3		5318.3	5197.4	29.4	49.7	4854.8	5845.8	56.7	10.3	6244.4	6658.2	6052.1	5440.1	8410.3	2708.1	9267.6	2743		1946.9	6569.8		3210.3	6280.3		5318.3	6052.1		6024	6052.1
1196.6	1827	6562.3	6664.9	6562.3	2985.5	6664.9	2985.5	5312.8	6263.7	6284.7	5901.3	3090.3	5894.4	5576.8	6233.5		7077.4	6890.7	45.3	49.7	10366.6	10586.7	56.7	47.6	4643	4936.7	3929.8	3343.9	6062.5	2703	5352.8	2726.4		1827	6263.7		2985.5	6233.5		7077.4	3929.8		6395	3929.8
3522.2	4422.5	5517.4	5350.9	5517.4	4377.8	5350.9	4377.8	5101.8	6317.2	6651.6	6665.1	6640.9	5874.7	6277.2	6222.7		5355.6	5120	50.7	49.8	7315.4	7656.1	56.9	103.6	5728.2	6097.1	5802.6	4994.6	13280.9	2687.3	6855.3	2708.1		4422.5	6317.2		4377.8	6222.7		5355.6	5802.6		5081.4	5802.6
4518.5	5671.8	6778.1	6655.6	6778.1	4861.8	6655.6	4861.8	5413.7	6573.8	5699.9	6744	6526.8	5868.6	6120.4	6215.2		6942.6	6623.4	27.7	50	4196.6	5401.5	57	60.1	6687.5	7215	6339.3	5712.3	5004.8	2682.8	5126.5	2703		5671.8	6573.8		4861.8	6215.2		6942.6	6339.3		6493	6339.3
5398.8	6595.4	7705.9	7477.3	7705.9	5470.2	7477.3	5470.2	5484.3	6862.6	6159.5	5845.5	5942.2	5855.9	6289.5	6127.4		4728.6	5075.8	31	50.1	4636.9	5591.3	57.1	55.8	4469.7	4658.1	4825.4	4072.9	6645	2673	11018.4	2687.3		6595.4	6862.6		5470.2	6127.4		4728.6	4825.4		8924.5	4825.4
2558.8	4339	5961.2	5387.7	5961.2	4058.9	5387.7	4058.9	6556.5	8201.3	6328.7	5864.2	6136.6	5842.3	6583.7	6117.5		7680.1	7534.5	38.5	50.8	11919.1	13388.7	57.4	46.7	7701.6	7364.1	7739.2	6303.3	4210.3	2670.8	4107.6	2682.8		4339	8201.3		4058.9	6117.5		7680.1	7739.2		7605.8	7739.2
2317.4	2742.7	5649	5648.8	5649	3113.9	5648.8	3113.9	5093.2	6130	3812.8	7329.6	6562.4	5831.2	6006	6112.5		7895.7	8033.1	34.7	50.8	6858.3	7295.5	57.6	42.8	7330.3	7739.7	7168.4	6118.6	4543.3	2670	5606.6	2673		2742.7	6130		3113.9	6112.5		7895.7	7168.4		8196.7	7168.4
1469.3	1926.1	3401.9	3526	3401.9	2391.9	3526	2391.9	5003.2	6137.6	3411.8	5537.9	5556.2	5790.2	5789.8	6098.3		10776.1	10719.8	47.8	51.8	6513.2	7701.2	57.7	44.2	6428.1	6736.7	5777.8	4795.8	9665.1	2664.5	3640.5	2670.8		1926.1	6137.6		2391.9	6098.3		10776.1	5777.8		10328.5	5777.8
3869.8	4898.6	4823.1	4741.8	4823.1	4086.8	4741.8	4086.8	5000.4	6240.5	6394.6	6023.7	5465	5775.6	6113	6095.5		6170.1	5994.8	45.4	53.1	4253.4	5020.5	57.9	48.5	6438.6	6284.1	6163.3	5161.4	6413.1	2647.3	3847.5	2670		4898.6	6240.5		4086.8	6095.5		6170.1	6163.3		6319.6	6163.3
1723.9	3673.4	5502.5	3948.5	5502.5	3168.8	3948.5	3168.8	8627.9	10704.4	6554.4	5929.9	4232.1	5751.1	6050.4	6057.8		10944.8	11215	56	53.1	8524.3	10845.4	58.3	54.9	11202.9	9714.4	10049.5	8500.3	4289.5	2638.3	8182.8	2664.5		3673.4	10704.4		3168.8	6057.8		10944.8	10049.5		9935.3	10049.5
2228.2	5376.6	8814.3	7618.7	8814.3	6055.2	7618.7	6055.2	9467.8	11438	5692.3	6022.2	5541.6	5728.7	7828	6043.1		8507.2	8679.9	43.1	53.4	6232.1	6701.6	58.4	60.4	6181.6	6295.2	5395.3	4487.2	5113.8	2597.3	5649	2647.3		5376.6	11438		6055.2	6043.1		8507.2	5395.3		8039	5395.3
3278.5	4470.7	4864.7	4853.9	4864.7	3893.1	4853.9	3893.1	4972	6062.1	3090.3	5782.5	5959.7	5682.8	6424	6038.3		5466.2	5127.6	36.4	53.8	5604.9	6837.9	58.9	52.7	5043.7	5211.8	4894.6	4353.1	1434.3	2592.1	3840.6	2638.3		4470.7	6062.1		3893.1	6038.3		5466.2	4894.6		7561.5	4894.6
4513.6	5355.3	7099.8	6927.1	7099.8	4951.3	6927.1	4951.3	5193.5	6295.9	6640.9	6192.5	5194.7	5682.5	5901.3	6028		5978.3	5836.5	39.9	54.8	4296.3	4387.5	59	56.2	5276.5	5545.6	4950.6	4129.6	6422.4	2590.6	4660.5	2597.3		5355.3	6295.9		4951.3	6028		5978.3	4950.6		5763.6	4950.6
4955.9	5777.6	7004.1	6783	7004.1	5011.7	6783	5011.7	5087.2	6032.4	6526.8	6212.4	2073.7	5648.4	6665.1	6008.6		14911.3	14639.4	61.8	55.2	6181.5	6286.4	59	51.3	12355.2	10881.5	12349.4	9267.6	4222.7	2585.2	1202.9	2592.1		5777.6	6032.4		5011.7	6008.6		14911.3	12349.4		13444.7	12349.4
2389.9	3785.1	6695.9	6621.6	6695.9	4320.2	6621.6	4320.2	5190.3	6273.6	5942.2	6309.2	5936.1	5628.4	6744	6002.5		7727	7735.7	46.3	55.3	7953.5	9177.8	59.2	50.9	6530.8	7041.5	6136.5	5352.8	4263.1	2583.8	5760.7	2590.6		3785.1	6273.6		4320.2	6002.5		7727	6136.5		7090.4	6136.5
2700	4310.5	6264.2	6049.6	6264.2	4257	6049.6	4257	5166.4	6225.7	6136.6	5742.9	5336.4	5610.4	5845.5	6000.8		8316.2	8002.6	33.2	55.6	5792.8	6203.7	59.2	59.6	8707.7	8245.3	8410.3	6855.3	820.6	2583.2	3647.1	2585.2		4310.5	6225.7		4257	6000.8		8316.2	8410.3		7604.1	8410.3
4231.1	5459.9	6874.9	6758.7	6874.9	4738.4	6758.7	4738.4	5168.6	6226.8	6562.4	6199.2	5867.5	5607.4	5864.2	5974.8		5248.5	5073.8	69.4	55.9	3064.4	3665.4	60.1	36.3	5548.2	5901.7	6062.5	5126.5	3732.1	2577.6	3580.4	2583.8		5459.9	6226.8		4738.4	5974.8		5248.5	6062.5		5025	6062.5
1503.3	1773	4367.9	2629.5	4367.9	2164.2	2629.5	2164.2	8807.5	6974.4	5556.2	5839	5787.7	5606.1	7329.6	5952.3		10424.4	10454.8	38	56.4	4243.8	5083.5	60.1	41.4	13495.8	12494	13280.9	11018.4	4301	2575.5	655.2	2583.2		1773	6974.4		2164.2	5952.3		10424.4	13280.9		11343.6	13280.9
1182.9	1714.6	4065	4026.3	4065	2351.4	4026.3	2351.4	5239.2	6696.3	5465	6036.4	1644	5576.1	5537.9	5932.5		7226.1	7068.8	58.9	56.7	12756.2	11256.1	60.2	68.4	5529.9	6072.8	5004.8	4107.6	1706.5	2571.9	1904.6	2577.6		1714.6	6696.3		2351.4	5932.5		7226.1	5004.8		6701.5	5004.8
4643.9	5658	6832.2	6802.8	6832.2	4846.6	6802.8	4846.6	4880.1	5991.5	4232.1	5696.6	3279.3	5575.1	6023.7	5930.3		7378.7	7199.8	8.4	56.7	5947.7	6969.9	60.3	53.5	7111.9	7368.6	6645	5606.6	4393	2569.4	3795.7	2575.5		5658	5991.5		4846.6	5930.3		7378.7	6645		6888	6645
4447.1	5332.3	6527.4	6406.9	6527.4	4669.3	6406.9	4669.3	4884.3	6171	5541.6	5849.2	4549.6	5540	5929.9	5904.7		4812.4	4806.2	47.4	56.7	5216.8	5931.5	60.6	19.2	4432.5	4934.1	4210.3	3640.5	5201.8	2547.6	1182.3	2571.9		5332.3	6171		4669.3	5904.7		4812.4	4210.3		5470.2	4210.3
1599.4	2279.7	4805	4752.4	4805	3054.8	4752.4	3054.8	4830.3	5912.3	5959.7	6633.8	5284.7	5504.4	6022.2	5903.5		6749.4	6728.1	22.9	56.9	4366	4033	60.9	56.2	4433.6	4748.2	4543.3	3847.5	6738.8	2540.9	3624.5	2569.4		2279.7	5912.3		3054.8	5903.5		6749.4	4543.3		9026.6	4543.3
1760.8	2609.4	6628.6	6920.5	6628.6	3620.6	6920.5	3620.6	4838.3	5614.4	5194.7	5561.6	5761.8	5498.7	5782.5	5894.4		9961.1	9572.8	60.4	57	634.3	643.1	62	30.1	10405.3	10280	9665.1	8182.8	7318.4	2537.2	4804	2547.6		2609.4	5614.4		3620.6	5894.4		9961.1	9665.1		9179.2	9665.1
3634.2	5210.6	6193.8	5999.8	6193.8	4391.2	5999.8	4391.2	4994.2	6047.6	2073.7	5013	4960	5464	6192.5	5874.7		6303.9	6339.3	61.3	57.1	927.8	1071.9	62	61.6	6888.9	6779.5	6413.1	5649	10061.5	2534.9	5743.8	2540.9		5210.6	6047.6		4391.2	5874.7		6303.9	6413.1		7182	6413.1
3416.7	5119	6749.9	6702.8	6749.9	4500.1	6702.8	4500.1	4875.9	6004.6	5936.1	5765.1	5621	5461.1	6212.4	5868.6		3746.8	3563.9	37.1	57.4	3545.6	4383.2	62.1	56.9	4224.8	4546.3	4289.5	3840.6	9875.5	2518.9	3809.4	2537.2		5119	6004.6		4500.1	5868.6		3746.8	4289.5		3617.5	4289.5
2265.4	3377.8	5426.3	5072	5426.3	3817.8	5072	3817.8	4708.2	5767.1	5336.4	5563.2	4993.7	5449	6309.2	5855.9		5468.3	5269.3	25.5	57.6	3303.3	2894.1	62.3	41.9	5397.9	6022.3	5113.8	4660.5	8676	2512.7	9136.5	2534.9		3377.8	5767.1		3817.8	5855.9		5468.3	5113.8		6189.9	5113.8
4493.1	5433	6180.1	6064.8	6180.1	4647.3	6064.8	4647.3	5141.5	6335.6	5867.5	6210.6	6158.8	5447.3	5742.9	5842.3		11984.5	12090	39.2	57.7	5326.1	5357.5	63.1	16.1	1646.1	1614	1434.3	1202.9	7124.6	2510.8	7827.3	2518.9		5433	6335.6		4647.3	5842.3		11984.5	1434.3		11491.2	1434.3
4851.7	5475	5750.9	5717.5	5750.9	4347	5717.5	4347	5001.7	6267.9	5787.7	6009.4	5484.6	5437	6199.2	5831.2		7083.4	7078.5	46	57.9	4942.7	5363.4	63.1	44.4	7079.7	7538.9	6422.4	5760.7	4751.6	2472.1	7259.5	2512.7		5475	6267.9		4347	5831.2		7083.4	6422.4		6861.9	6422.4
2058.2	2395.6	4982.4	4909.2	4982.4	2872.5	4909.2	2872.5	4815.3	5743.3	1644	5805	5734.6	5402	5839	5790.2		6498.6	6075.8	55.3	58.3	4072.5	5051.3	63.2	66.1	4804.3	5357.7	4222.7	3647.1	2499.2	2450.8	5840.6	2510.8		2395.6	5743.3		2872.5	5790.2		6498.6	4222.7		5860.9	4222.7
2180.1	3176.3	5797.5	5881.5	5797.5	3907.7	5881.5	3907.7	4749.7	5736.7	3279.3	4995.5	6654.7	5349	6036.4	5775.6		4357.8	4295.4	38	58.4	5972.4	7654.2	63.2	55.7	4017.1	4382.3	4263.1	3580.4	4176.9	2445.5	4061.6	2472.1		3176.3	5736.7		3907.7	5775.6		4357.8	4263.1		4119.9	4263.1
2314.8	2978.4	6384.6	6372	6384.6	3322.1	6372	3322.1	4956.8	5996.9	4549.6	6039.6	5016.4	5340.8	5696.6	5751.1		799.6	831.3	38.1	58.9	7936	9956.5	63.3	56.6	703	805.3	820.6	655.2	4535.5	2435.5	1921.7	2450.8		2978.4	5996.9		3322.1	5751.1		799.6	820.6		1207.8	820.6
2491.9	3485.9	4953.9	4865.2	4953.9	3646	4865.2	3646	4899.3	5955.2	5284.7	5592.1	3479	5328.2	5849.2	5728.7		1677.7	1830.8	66.7	59	7896.7	9120.6	63.9	15.2	2700	2718	3732.1	1904.6	4877.6	2429	3731.2	2445.5		3485.9	5955.2		3646	5728.7		1677.7	3732.1		13892.7	3732.1
4188.8	5394.1	6792.5	7052	6792.5	4781.4	7052	4781.4	5125.8	6280.5	5761.8	5618.1	2421.5	5301.4	6633.8	5682.8		4549.8	4410.2	62.7	59	5463.2	6620	64	64.4	4416	4849.9	4301	3795.7	4748.1	2427.9	3829.1	2435.5		5394.1	6280.5		4781.4	5682.8		4549.8	4301		4968.5	4301
3146	4289.2	6916.1	6805.3	6916.1	4516.9	6805.3	4516.9	5190.2	6058.3	4960	5571.4	4054.9	5285.3	5561.6	5682.5		3641	3577.9	44.5	59.2	5245.6	6091.3	64.7	3.1	1324.4	1392	1706.5	1182.3	5779.6	2427.2	4083.6	2429		4289.2	6058.3		4516.9	5682.5		3641	1706.5		3307.4	1706.5
739.2	1176.9	5375.1	5492.7	5375.1	2234.1	5492.7	2234.1	4774.7	5586.7	5621	5757.1	4663.9	5277.1	5013	5648.4		5658	5843.8	54.6	59.2	4226.3	4791.4	65.7	61.1	4707.2	4632	4393	3624.5	4559.4	2425.7	4132.4	2427.9		1176.9	5586.7		2234.1	5648.4		5658	4393		5218.4	4393
3921.1	4169.2	5274.1	5284	5274.1	3976.7	5284	3976.7	4699.9	5745.7	4993.7	5357.7	5304.8	5273.5	5765.1	5628.4		4752.5	5292.6	37.1	60.1	2993.9	3724.3	66.1	64.4	5082.7	5539	5201.8	4804	4750.1	2415.7	5131.1	2427.2		4169.2	5745.7		3976.7	5628.4		4752.5	5201.8		9878	5201.8
1688.8	3316	4209.1	3501.1	4209.1	3008.4	3501.1	3008.4	6199.3	7757.1	6158.8	5706.3	3898.3	5264.3	5563.2	5610.4		4809.5	4931.7	35.3	60.1	4440.8	5182.8	66.4	61	6896.4	7248.8	6738.8	5743.8	4461.1	2400.7	3952.7	2425.7		3316	7757.1		3008.4	5610.4		4809.5	6738.8		5555.3	6738.8
1241.4	2716.8	5426.8	5385.4	5426.8	3877.8	5385.4	3877.8	4902.6	5834.8	5484.6	5645.6	4702.9	5256.1	6210.6	5607.4		11263.3	13919	50.9	60.2	3441	3633.2	66.6	70	6708.4	7248	7318.4	3809.4	3691.8	2395.9	3806.4	2415.7		2716.8	5834.8		3877.8	5607.4		11263.3	7318.4		30810.3	7318.4
2686	3533.7	5258.4	5276.3	5258.4	3746.4	5276.3	3746.4	4716	5710.1	5734.6	5799	3424.8	5251	6009.4	5606.1		10533.1	9839.2	48.5	60.3	4729.4	5375	67	58.5	11309.1	11615.4	10061.5	9136.5	2927.4	2389.2	3886.5	2400.7		3533.7	5710.1		3746.4	5606.1		10533.1	10061.5		9433.5	10061.5
806.4	1058.9	3193.9	3305.3	3193.9	1683.1	3305.3	1683.1	4540	5482.6	6654.7	6183.2	5881.8	5239	5805	5576.1		9325.5	9639.8	9.4	60.6	5300.3	5638.1	67.1	63.2	10097.8	9375.5	9875.5	7827.3	3966.1	2380.8	3119.8	2395.9		1058.9	5482.6		1683.1	5576.1		9325.5	9875.5		9357.1	9875.5
1135.7	2454.1	5693	4541.1	5693	2772.6	4541.1	2772.6	7209.6	8943	5016.4	5600	5585.6	5236.6	4995.5	5575.1		6748.5	6588	55.1	60.9	5894.2	6294.7	67.5	73.9	8651.3	8450.9	8676	7259.5	6070.6	2368.4	2327.3	2389.2		2454.1	8943		2772.6	5575.1		6748.5	8676		7071.4	8676
1259.8	2027.1	4768.2	4690.8	4768.2	3059.4	4690.8	3059.4	4744.3	5680.7	3479	4810.3	6309.6	5206	6039.6	5540		6265.8	6638.5	26.1	62	7112.1	6956.1	68.1	51	6969	6708	7124.6	5840.6	3906.7	2365.4	3182.7	2380.8		2027.1	5680.7		3059.4	5540		6265.8	7124.6		6924.9	7124.6
3551.9	4313.4	5655.3	5554.4	5655.3	3939.3	5554.4	3939.3	4776.9	5887.5	2421.5	4817.9	4574.4	5184.9	5592.1	5504.4		5076	5027.6	70.3	62	3935.7	4382.5	68.3	58	4835.4	5124.7	4751.6	4061.6	5334.6	2349.7	5198.7	2368.4		4313.4	5887.5		3939.3	5504.4		5076	4751.6		4802.7	4751.6
4452.2	5278.3	6357.4	6264.9	6357.4	4464.8	6264.9	4464.8	4908.1	6066.9	4054.9	5141.8	2050.4	5182.7	5618.1	5498.7		9756.5	15283.6	50.9	62.1	11127.4	10070	68.4	48	2654.9	2640.8	2499.2	1921.7	5765.4	2341.3	3141.6	2365.4		5278.3	6066.9		4464.8	5498.7		9756.5	2499.2		12234.8	2499.2
2855	3322.8	4645.7	4781.7	4645.7	3161.4	4781.7	3161.4	4614.5	5571.4	4663.9	4963.1	5495.6	5171.4	5571.4	5464		3522.7	3544.7	47.8	62.3	2906.3	2601.4	68.5	63	3888.3	4140.3	4176.9	3731.2	8497.1	2334.1	4354.6	2349.7		3322.8	5571.4		3161.4	5464		3522.7	4176.9		4969.2	4176.9
4214.1	5353.9	6545.6	6287.6	6545.6	4603.7	6287.6	4603.7	4892.3	5803.2	5304.8	5116.4	5175.4	5119.6	5757.1	5461.1		5540	5403.2	8.8	63.1	3749.6	3737.6	68.9	65	4861.1	5344.1	4535.5	3829.1	4263.5	2331.8	4728	2341.3		5353.9	5803.2		4603.7	5461.1		5540	4535.5		5112	4535.5
1853.8	2835.3	3955.1	3781.9	3955.1	2951.9	3781.9	2951.9	5122.9	6451.6	3898.3	5290.8	5344.3	5098.6	5357.7	5449		3399.4	3974.2	40.1	63.1	6067.6	6547.3	69.2	73.4	4604.7	4922.1	4877.6	4083.6	6084.4	2322.5	7005.6	2334.1		2835.3	6451.6		2951.9	5449		3399.4	4877.6		5687.4	4877.6
3785.5	4496.9	5552.1	5452	5552.1	3973.7	5452	3973.7	4469.3	5392.8	4702.9	5589.9	5208.8	5080.8	5706.3	5447.3		5916.1	5745.1	62.9	63.2	3504.5	3335.8	69.4	66.6	5115.3	5434.4	4748.1	4132.4	4388	2321.9	3682.3	2331.8		4496.9	5392.8		3973.7	5447.3		5916.1	4748.1		6411.6	4748.1
3602.5	4384.3	5697.7	5724.6	5697.7	3908.9	5724.6	3908.9	4471.1	5318.5	3424.8	5326.4	4395.2	5071.5	5645.6	5437		6036.3	5542.7	81.4	63.2	4370.5	5130.3	69.5	46.2	6230.2	6439.3	5779.6	5131.1	6293.5	2311.8	5315.2	2322.5		4384.3	5318.5		3908.9	5437		6036.3	5779.6		5473.9	5779.6
3149.6	4707.4	5494.7	5248.1	5494.7	3986.8	5248.1	3986.8	4497.6	5409.6	5881.8	5639.8	5365.3	5061.4	5799	5402		6829.8	6643.3	30.1	63.3	8957.6	8717.6	69.8	53.8	5708.6	6112.3	4559.4	3952.7	6746.4	2311.2	3713.3	2321.9		4707.4	5409.6		3986.8	5402		6829.8	4559.4		6165.3	4559.4
4040.6	5474.9	6324.5	6030	6324.5	4397.5	6030	4397.5	4678.6	5821.2	5585.6	5833.6	6360.3	5046.9	6183.2	5349		6993.6	7627.1	10.1	63.9	13278.8	14676.3	70	56.1	5233.4	5403.6	4750.1	3806.4	4563.9	2310.4	5265.7	2311.8		5474.9	5821.2		4397.5	5349		6993.6	4750.1		8391.6	4750.1
2891.2	3904.5	5725.3	5756.5	5725.3	3919.6	5756.5	3919.6	4466.2	5347.5	6309.6	5957.4	4429.1	5031.7	5600	5340.8		4521.2	4571.1	71.3	64	3620.3	4241.6	70.3	64.5	4673.4	5018	4461.1	3886.5	2883.2	2284.2	6022	2311.2		3904.5	5347.5		3919.6	5340.8		4521.2	4461.1		4311.1	4461.1
1828.7	2561.6	5511.6	5573.9	5511.6	3520.6	5573.9	3520.6	4122.9	4866.7	4574.4	5633	5128	5023.1	4810.3	5328.2		11319	11572.1	4.6	64.7	4956.9	5694.9	70.9	46.7	3865.2	4069.3	3691.8	3119.8	4529.2	2283.9	3681.7	2310.4		2561.6	4866.7		3520.6	5328.2		11319	3691.8		10242.5	3691.8
857.9	1436.1	3803.5	3927.6	3803.5	2087.5	3927.6	2087.5	4607.3	5395.2	2050.4	4015.4	4854.6	5017.9	4817.9	5301.4		2921.5	2974.2	59.2	65.7	3715.5	3926.1	72.1	27.7	2639.9	2879.9	2927.4	2327.3	2782.9	2272.8	2420.9	2284.2		1436.1	5395.2		2087.5	5301.4		2921.5	2927.4		2846.6	2927.4
1085.3	2209.7	4755.2	4507.5	4755.2	3020.2	4507.5	3020.2	4857.3	5878.3	5495.6	5091.4	5424.2	5010.5	5141.8	5285.3		4888.9	4162.6	56.9	66.1	5624.4	5847.8	73	79.7	3931.3	4459.4	3966.1	3182.7	5650.8	2265.5	3769.5	2283.9		2209.7	5878.3		3020.2	5285.3		4888.9	3966.1		11211.6	3966.1
3394.9	4173.9	5598.2	5860.5	5598.2	3954.7	5860.5	3954.7	3818.9	4463.2	5175.4	4826.3	5156.1	4985.2	4963.1	5277.1		6582.4	6589.6	48.2	66.4	5691.7	6648.5	73.3	74	6223.5	6498	6070.6	5198.7	7787.4	2260.9	2248.9	2272.8		4173.9	4463.2		3954.7	5277.1		6582.4	6070.6		5982.3	6070.6
4061.7	5228.7	5879.7	5869.2	5879.7	4230.6	5869.2	4230.6	4477.7	5521.8	5344.3	5455.8	5507.9	4975.1	5116.4	5273.5		3729.9	3796.7	73.5	66.6	11964.5	11922.5	73.6	77.4	3741	3997.5	3906.7	3141.6	3851.7	2248.3	4669.2	2265.5		5228.7	5521.8		4230.6	5273.5		3729.9	3906.7		3292.9	3906.7
1661.5	2349.8	4761.4	4801.5	4761.4	2839.5	4801.5	2839.5	4399.3	5188.3	5208.8	4945.5	4383.1	4956.4	5290.8	5264.3		5642.5	5357.7	47.6	67	2999.6	2761.1	74	28.4	5474.5	5671.4	5334.6	4354.6	2672.8	2243.7	7051.6	2260.9		2349.8	5188.3		2839.5	5264.3		5642.5	5334.6		5520	5334.6
2365.5	2946.2	4066.9	4179.9	4066.9	3067.2	4179.9	3067.2	4539.4	5469	4395.2	5510.8	5328.9	4952.9	5589.9	5256.1		9411.5	9428.9	66.4	67.1	11066.6	9323.9	74	65.3	6506.4	6538.4	5765.4	4728	4857.5	2229.2	3321.6	2248.3		2946.2	5469		3067.2	5256.1		9411.5	5765.4		8162.7	5765.4
1985.7	2626.5	5548.1	5632.3	5548.1	3238.3	5632.3	3238.3	4439.5	5213.6	5365.3	5103.3	5360.1	4911.4	5326.4	5251		15331.5	15781.3	65	67.5	2215.7	2327.2	74.2	73.3	10348	11138.3	8497.1	7005.6	4816.4	2202.3	2242.2	2243.7		2626.5	5213.6		3238.3	5251		15331.5	8497.1		15138.2	8497.1
4206	5245.4	5772.3	5804.1	5772.3	4208.9	5804.1	4208.9	4725.2	5791	6360.3	6548.9	2559.2	4900.6	5639.8	5239		4492	4507.8	40.5	68.1	5954.4	7002.2	74.4	71.4	4384.1	4432.6	4263.5	3682.3	2894.1	2191.4	4005	2229.2		5245.4	5791		4208.9	5239		4492	4263.5		4830.1	4263.5
3824.2	5332.9	5686.9	5835	5686.9	4291.2	5835	4291.2	4734.3	5823.1	4429.1	5306.1	4886	4872.1	5833.6	5236.6		5378.4	5418.9	54.1	68.3	9517.7	10261.8	74.7	58.4	5755.9	5908.6	6084.4	5315.2	5790.4	2187.5	4128	2202.3		5332.9	5823.1		4291.2	5236.6		5378.4	6084.4		7235.6	6084.4
3944.1	5164.4	5211.6	5042.9	5211.6	3793.4	5042.9	3793.4	4714.6	6013.3	5128	5154.5	5009.9	4868.4	5957.4	5206		4342.4	4191.6	64.3	68.4	9648.6	8987.3	74.8	72.2	4191.2	4141.8	4388	3713.3	9306.8	2187.3	2398.3	2191.4		5164.4	6013.3		3793.4	5206		4342.4	4388		3960	4388
1807.1	3112.5	6026.4	6283	6026.4	4000.5	6283	4000.5	4279.3	5173.8	4854.6	5280.7	4172.4	4791.1	5633	5184.9		6035.7	6150.9	61	68.5	4999.3	4368.2	75.2	79.7	6079.5	6111.3	6293.5	5265.7	4498	2187.2	5140.8	2187.5		3112.5	5173.8		4000.5	5184.9		6035.7	6293.5		5851.5	6293.5
823	1024.7	3115.2	3180.3	3115.2	1404	3180.3	1404	4999.4	6015.6	5424.2	5216.5	5416.2	4789.3	4015.4	5182.7		6492.2	6820.2	59	68.9	5845.9	6207.4	75.6	74.1	7007.5	7290.7	6746.4	6022	9678.1	2181.8	7800.8	2187.3		1024.7	6015.6		1404	5182.7		6492.2	6746.4		6833.1	6746.4
3932.3	4590.1	5504.7	5221.7	5504.7	3937.8	5221.7	3937.8	4466.7	5452	5156.1	4972.2	5016.7	4787.8	5091.4	5171.4		13879.2	14414.1	58.2	69.2	4635.4	5152.6	75.7	74.6	4749	5023.2	4563.9	3681.7	3891.7	2172.2	3603.4	2187.2		4590.1	5452		3937.8	5171.4		13879.2	4563.9		15014.6	4563.9
3414.5	4582.7	5836.1	5783.7	5836.1	4079.8	5783.7	4079.8	4323.3	5384.2	5507.9	5207.2	3240.8	4780.5	4826.3	5119.6		3616	3615.9	56.5	69.4	1795.6	2265.4	75.8	69.9	2977.6	3326.2	2883.2	2420.9	4465.4	2165.5	8763.9	2181.8		4582.7	5384.2		4079.8	5119.6		3616	2883.2		4882.4	2883.2
3100.6	3939.3	4640.3	4683.8	4640.3	3827.5	4683.8	3827.5	4216.2	5225.5	4383.1	4906	3999.2	4761.4	5455.8	5098.6		10629.1	11399.7	42.6	69.5	4182.2	5300.9	76.3	54	5099.4	5338.6	4529.2	3769.5	4190.5	2162.3	3255.6	2172.2		3939.3	5225.5		3827.5	5098.6		10629.1	4529.2		10947.3	4529.2
2735.5	3510.9	3939.2	3849.5	3939.2	3056.9	3849.5	3056.9	4160.4	5203.8	5328.9	5014.1	5410.7	4760.5	4945.5	5080.8		2432.7	2404.3	53.7	69.8	9096.6	10193	76.7	80.2	2241.9	2419.1	2782.9	2248.9	5386.9	2160.3	3278.5	2165.5		3510.9	5203.8		3056.9	5080.8		2432.7	2782.9		3456.7	2782.9
2003.2	2687.4	5295.4	5226.4	5295.4	3062.7	5226.4	3062.7	4437.5	5250.3	5360.1	5316.2	5137.5	4744.2	5510.8	5071.5		7407.2	7095.7	55.6	70	11401.2	11548.8	77.6	67	5967.4	6020.1	5650.8	4669.2	8517.6	2146.7	3511.4	2162.3		2687.4	5250.3		3062.7	5071.5		7407.2	5650.8		6834.9	5650.8
2707.5	3221.8	5020.7	4837.7	5020.7	3091	4837.7	3091	4340.2	5419.8	2559.2	5103	4752	4736.6	5103.3	5061.4		10392.5	10024.5	50.3	70.3	12520.1	13742.2	77.7	75	9027.7	9328.2	7787.4	7051.6	3765.7	2136.5	4515.3	2160.3		3221.8	5419.8		3091	5061.4		10392.5	7787.4		9833.1	7787.4
3585.7	4354.6	4461.2	4177.6	4461.2	3353.3	4177.6	3353.3	3891.7	4929.3	4886	4856.1	4695.6	4736	6548.9	5046.9		9601	9888.7	39.2	70.9	4217.4	4632.3	79.1	60.2	3864.5	4150.2	3851.7	3321.6	3518.1	2132	7343.5	2146.7		4354.6	4929.3		3353.3	5046.9		9601	3851.7		9105.4	3851.7
1553.1	2391	5009.7	5135.2	5009.7	3283.4	5135.2	3283.4	4126.4	5044.2	5009.9	5195.1	4409	4722.7	5306.1	5031.7		4341.4	4796.8	20.8	72.1	7733.1	7615.4	79.2	56.5	2996.9	3135.1	2672.8	2242.2	5639.8	2130.4	3403.4	2136.5		2391	5044.2		3283.4	5031.7		4341.4	2672.8		4076.2	2672.8
3663.5	4610.4	5424.7	5300.3	5424.7	3787.4	5300.3	3787.4	4481	5481.8	4172.4	4359.2	5044.7	4711.7	5154.5	5023.1		6879.8	6619.1	74.8	72.2	3784.2	4229	79.2	87.8	5068.2	5445.3	4857.5	4005	2998.8	2121.6	3237	2132		4610.4	5481.8		3787.4	5023.1		6879.8	4857.5		6077.5	4857.5
2468.4	3217.8	4310.6	3779.9	4310.6	3202.5	3779.9	3202.5	4222.4	5239.9	5416.2	5144.8	4840.5	4707.7	5280.7	5017.9		5631.7	5505.9	76.8	73	3853.4	4725	79.5	67.6	5285.1	5754.9	4816.4	4128	3966.8	2117.5	4617.2	2130.4		3217.8	5239.9		3202.5	5017.9		5631.7	4816.4		5200	4816.4
3368.1	3976.6	5183.1	5079.8	5183.1	3674.8	5079.8	3674.8	4134.6	5153.6	5016.7	5045.1	5032	4666.5	5216.5	5010.5		2422.4	2288.3	72.2	73.3	10177	11218.2	79.8	65.2	2763.4	2952.4	2894.1	2398.3	4420.2	2111.2	2682.5	2121.6		3976.6	5153.6		3674.8	5010.5		2422.4	2894.1		2490.9	2894.1
3673.2	4392.5	5439.9	5406.6	5439.9	3936.2	5406.6	3936.2	4241.3	5077.2	3240.8	4757.5	4085.7	4600.2	4972.2	4985.2		5338.6	5384.9	74.2	73.3	3727.4	4554.5	79.9	65.6	5786	6046.3	5790.4	5140.8	2825.1	2100.3	3682.1	2117.5		4392.5	5077.2		3936.2	4985.2		5338.6	5790.4		6102.6	5790.4
4298.1	4826.9	5435.1	5248.8	5435.1	3834.7	5248.8	3834.7	4186.3	5159.8	3999.2	4432	3013.8	4590.8	5207.2	4975.1		10470.8	10502.3	46.3	73.6	2250.8	3207.9	79.9	50.7	10095.4	10237.8	9306.8	7800.8	3583.7	2091.4	4048.7	2111.2		4826.9	5159.8		3834.7	4975.1		10470.8	9306.8		10047.2	9306.8
1384.3	2345.4	3705.8	3461.5	3705.8	2721.1	3461.5	2721.1	4920.9	6049.5	5410.7	5140.7	1447	4581.7	4906	4956.4		10258.4	13091.8	17.8	74	5898.4	7075.2	80.6	72.5	4500.4	5051.3	4498	3603.4	3955.8	2087.9	2485.2	2100.3		2345.4	6049.5		2721.1	4956.4		10258.4	4498		17041.2	4498
3701.1	4410.3	5204.2	5145.9	5204.2	3630.3	5145.9	3630.3	4164.7	5152.8	5137.5	4718.2	4583.4	4567.6	5014.1	4952.9		15064.7	14507.9	49	74	2057.5	2465.6	80.6	71	11508.4	11928.8	9678.1	8763.9	7221.7	2086	3201.5	2091.4		4410.3	5152.8		3630.3	4952.9		15064.7	9678.1		14836.1	9678.1
4423.1	5017.4	5631.7	5491.7	5631.7	4082.2	5491.7	4082.2	4412.2	5296	4752	4645.4	5118.5	4524.8	5316.2	4911.4		5016.2	5099.7	64.8	74.4	4582.7	5292.7	81.5	73.7	4133.7	4344	3891.7	3255.6	5289.7	2066.3	2986.7	2087.9		5017.4	5296		4082.2	4911.4		5016.2	3891.7		4792	3891.7
775.8	1263.4	4652	4525.4	4652	2297	4525.4	2297	4268.3	5380.4	4695.6	5010.7	4436.2	4523.2	5103	4900.6		8266.9	7862.8	62.7	74.7	3305.1	3941	81.6	82.3	4449.7	4099.6	4465.4	3278.5	6996	2065.3	6207.1	2086		1263.4	5380.4		2297	4900.6		8266.9	4465.4		6980.5	4465.4
2768.4	4004	5090.7	5060	5090.7	3619.1	5060	3619.1	4066.3	4894.2	4409	4730.8	5793.1	4522.8	4856.1	4872.1		4563.5	4308.2	86.9	75.2	3514.8	3657.8	81.7	92	4511.8	4858.5	4190.5	3511.4	4850.5	2060	4651.7	2066.3		4004	4894.2		3619.1	4872.1		4563.5	4190.5		4307.6	4190.5
2948.8	3516.2	4993.5	4848.6	4993.5	3428.3	4848.6	3428.3	4199	5025.7	5044.7	4743	4391.7	4520.6	5195.1	4868.4		4854.3	4735.9	76.7	75.6	2706.6	3284.7	82.2	97.1	5347.3	5458.2	5386.9	4515.3	7357	2057.9	5396.3	2065.3		3516.2	5025.7		3428.3	4868.4		4854.3	5386.9		4830.1	5386.9
1465.5	3141.8	4968.3	4306.4	4968.3	3254	4306.4	3254	5535.9	7239.4	4840.5	4706.5	4590.1	4518.8	4359.2	4791.1		12522.7	11858.6	69	75.7	4095.2	4660.5	82.4	65.2	10476.5	10816.2	8517.6	7343.5	4204.7	2056.1	3964.3	2060		3141.8	7239.4		3254	4791.1		12522.7	8517.6		11121.9	8517.6
3797.7	4467.1	5484.4	5356.6	5484.4	3967.5	5356.6	3967.5	4120.1	4975.4	5032	4979.7	4806.9	4509.7	5144.8	4789.3		4631.4	4284.6	69.8	75.8	6707.5	7594.1	83.2	24	4122.3	4652.3	3765.7	3403.4	6465.2	2043.1	6272	2057.9		4467.1	4975.4		3967.5	4789.3		4631.4	3765.7		5260.3	3765.7
2965.3	3765.5	4292.2	4283	4292.2	3287.2	4283	3287.2	3813	4811.2	4085.7	4035.9	4512.5	4499.1	5045.1	4787.8		3088.3	3009.4	46.3	76.3	5076.9	5856.9	83.5	68.1	3618.5	3814.3	3518.1	3237	4789.9	2023.9	3507.1	2056.1		3765.5	4811.2		3287.2	4787.8		3088.3	3518.1		3239.9	3518.1
1464.2	1758	2107.5	2004.6	2107.5	1626.9	2004.6	1626.9	4253.9	5220.9	3013.8	4641.6	5221.9	4498.5	4757.5	4780.5		8018.4	7805.9	57.4	76.7	5552.3	6502.6	83.9	78.8	6272.4	6348.1	5639.8	4617.2	3188.3	2023.5	5384.6	2043.1		1758	5220.9		1626.9	4780.5		8018.4	5639.8		7587	5639.8
1288.4	2595.1	4370.6	3821.5	4370.6	2752.1	3821.5	2752.1	4863.6	5921	1447	4167.9	4450.5	4466.5	4432	4761.4		2643.6	2611.3	67.1	77.6	8535.1	8486.4	84	98.9	2942.6	3224.9	2998.8	2682.5	4379.5	2018	4075.4	2023.9		2595.1	5921		2752.1	4761.4		2643.6	2998.8		2645.4	2998.8
3468.9	4217.2	4439.9	4208.6	4439.9	3305.8	4208.6	3305.8	4013.8	4943.8	4583.4	4639.6	3453.7	4444.5	5140.7	4760.5		5483.3	5166	60.7	77.7	7046.9	7873.8	84.7	70	4440.5	4976	3966.8	3682.1	5651.9	2013.8	2929.4	2023.5		4217.2	4943.8		3305.8	4760.5		5483.3	3966.8		5785.6	3966.8
3620.3	4424.6	5427.8	5235.8	5427.8	3715	5235.8	3715	4633.8	5595.7	5118.5	4771.1	4798.3	4435.2	4718.2	4744.2		3676	3690.5	53.3	79.1	7028.3	6207.6	84.8	76.1	4296.8	4533.9	4420.2	4048.7	3359.5	2009.6	3633.9	2018		4424.6	5595.7		3715	4744.2		3676	4420.2		4821.2	4420.2
3490.4	4282.6	4715.4	4633.7	4715.4	3621.4	4633.7	3621.4	3862.9	4875.7	4436.2	4179.6	1719.1	4422.7	4645.4	4736.6		4084.5	3971.8	68.7	79.2	5589.4	6637	85.5	75	3126.5	3507.1	2825.1	2485.2	3901.5	2008.3	4729.3	2013.8		4282.6	4875.7		3621.4	4736.6		4084.5	2825.1		4447.9	2825.1
2257	2837.9	4682.1	4667.5	4682.1	2960	4667.5	2960	4049.3	4892.9	5793.1	5406.7	5348.8	4414.1	5010.7	4736		3418.2	3243.8	78.5	79.2	8488.5	8431.8	85.6	28.4	3589	3797.5	3583.7	3201.5	3584.3	2007.7	3153.9	2009.6		2837.9	4892.9		2960	4736		3418.2	3583.7		3454.9	3583.7
2179.5	3050.6	4266.7	4307.6	4266.7	3178.7	4307.6	3178.7	3944.6	4838.2	4391.7	4714.1	4452.9	4393.2	4730.8	4722.7		4979	5052.4	75.9	79.5	2830.4	3287.1	85.8	90.6	4006.4	3802.2	3955.8	2986.7	2360.1	1996	3025.1	2008.3		3050.6	4838.2		3178.7	4722.7		4979	3955.8		5814.4	3955.8
2472	3340.3	4556.6	4583.6	4556.6	3217.5	4583.6	3217.5	4014.6	4800.6	4590.1	4664.7	4624.8	4386.7	4743	4711.7		7939.7	7691	63.1	79.8	4201.4	4607.5	85.8	66.5	7976.2	8063.5	7221.7	6207.1	3554.3	1988.2	3107.1	2007.7		3340.3	4800.6		3217.5	4711.7		7939.7	7221.7		7267.1	7221.7
2896	3406.1	3947.3	3969.7	3947.3	3212.3	3969.7	3212.3	3928.7	4783.6	4806.9	4568.3	4489.9	4363.3	4706.5	4707.7		6339.7	6122.7	66	79.9	6361.4	6976.7	85.9	83.9	5936	6256.7	5289.7	4651.7	3014.9	1986.7	2051.2	1996		3406.1	4783.6		3212.3	4707.7		6339.7	5289.7		5864.7	5289.7
3499.1	4162.2	5499.6	5261.9	5499.6	3744.8	5261.9	3744.8	4199.2	5074.2	4512.5	4968.5	4102.1	4353.5	4979.7	4666.5		7233.5	7024.3	78.4	79.9	2635.9	3387	86.3	78.3	7243.6	6340.3	6996	5396.3	3876.4	1969.3	3159.6	1988.2		4162.2	5074.2		3744.8	4666.5		7233.5	6996		6235.9	6996
2605	3649.7	4067.5	4284.2	4067.5	3021.9	4284.2	3021.9	3834.1	4500.2	5221.9	4990.5	4514.4	4352.5	4035.9	4600.2		8983.7	9038.1	87.4	80.6	2763.8	3645	86.9	85.5	6065.3	5973.1	4850.5	3964.3	3134.3	1967.7	2408.6	1986.7		3649.7	4500.2		3021.9	4600.2		8983.7	4850.5		8113	4850.5
1290.4	1851.3	4120	4104	4120	2149.4	4104	2149.4	4083.9	4912.9	4450.5	4608	4726	4350.6	4641.6	4590.8		8388.5	8169.8	56.7	80.6	2325	3182.4	87	98.4	8227	7941.2	7357	6272	4051.7	1966.7	2895.8	1969.3		1851.3	4912.9		2149.4	4590.8		8388.5	7357		7484.7	7357
408.9	694.7	3139.5	3293.9	3139.5	1358.5	3293.9	1358.5	3932.5	4718.5	3453.7	4648.3	4512.4	4306.9	4167.9	4581.7		6956.9	7112.8	83.6	81.5	1760.8	2133.2	87.1	74.4	4258.5	4498.1	4204.7	3507.1	3350.4	1952.2	2508.3	1967.7		694.7	4718.5		1358.5	4581.7		6956.9	4204.7		6309.3	4204.7
2913.9	4094.2	5044.2	5078.3	5044.2	3710.4	5078.3	3710.4	3891.8	4665	4798.3	4781.4	4763.8	4284.7	4639.6	4567.6		6492.5	6856.2	78.6	81.6	3028.1	3523.5	87.1	84.9	6762.6	6419.4	6465.2	5384.6	5828.2	1941	3365.2	1966.7		4094.2	4665		3710.4	4567.6		6492.5	6465.2		6542.6	6465.2
3387.2	3825.9	4424.5	4375.6	4424.5	3186	4375.6	3186	3769.6	4555.7	1719.1	3956.4	3406.5	4278.4	4771.1	4524.8		8794.6	8922.7	86.3	81.7	3893	4264.6	87.7	80.7	5537.1	6058.5	4789.9	4075.4	5458.9	1935.2	2776.2	1952.2		3825.9	4555.7		3186	4524.8		8794.6	4789.9		7920.3	4789.9
2368.8	3496.7	4167.9	4197.3	4167.9	2960.6	4197.3	2960.6	3734.8	4572.9	5348.8	5050.7	3873.5	4211.3	4179.6	4523.2		3562.3	3315.8	84.5	82.2	3172.9	3317.3	88	87.8	3298.3	3644.8	3188.3	2929.4	2687	1934.5	5135.4	1941		3496.7	4572.9		2960.6	4523.2		3562.3	3188.3		4223.7	3188.3
3531.2	5018.4	5367.3	4982.6	5367.3	3741.1	4982.6	3741.1	3894.3	4715.9	4452.9	4513.5	4132.2	4181.7	5406.7	4522.8		5089.9	4887.3	68.7	82.4	8298.9	7744.6	88.2	87.5	4713.3	5020.7	4379.5	3633.9	7422.4	1928.5	4994.4	1935.2		5018.4	4715.9		3741.1	4522.8		5089.9	4379.5		4609.1	4379.5
2493.3	3257.8	4679.5	4614.5	4679.5	3288.2	4614.5	3288.2	3942.4	4635.3	4624.8	4446.9	2757.5	4173.3	4714.1	4520.6		7592.3	7442.4	17.7	83.2	10197.4	8838.5	88.5	81.3	6274.1	6362.6	5651.9	4729.3	3645.7	1925.9	2340.2	1934.5		3257.8	4635.3		3288.2	4520.6		7592.3	5651.9		6959.5	5651.9
2450.3	3401.9	4798.2	4741.9	4798.2	3363	4741.9	3363	3777.9	4621.8	4489.9	4380.4	4121.7	4139.3	4664.7	4518.8		3470.2	3241.1	74.9	83.5	2974.6	3287	88.8	87.7	3726.5	4117.6	3359.5	3153.9	2228.4	1925.9	6337.7	1928.5		3401.9	4621.8		3363	4518.8		3470.2	3359.5		3212.5	3359.5
3606.2	4164.9	4826	4682.8	4826	3442.5	4682.8	3442.5	3832.9	4727.6	4102.1	4606.2	4293.9	4131.9	4568.3	4509.7		3717.7	3448.7	63.9	83.9	5756	6555.9	89.4	84.2	3650.8	3764.9	3901.5	3025.1	6576.9	1924.8	3197.5	1925.9		4164.9	4727.6		3442.5	4509.7		3717.7	3901.5		4446.8	3901.5
2613.6	3527.3	5071.7	5113.3	5071.7	3654	5113.3	3654	3732.9	4457.3	4514.4	4297.7	4365.4	4083.2	4968.5	4499.1		2978.3	2886.1	72.5	84	4430.7	5272	89.4	56.8	3478	3703	3584.3	3107.1	5108.8	1915.9	1927.4	1925.9		3527.3	4457.3		3654	4499.1		2978.3	3584.3		3882.9	3584.3
3185.4	4179.8	4072.5	4044.9	4072.5	3193.7	4044.9	3193.7	3971.2	4962.3	4726	4623.9	3761.5	4069.6	4990.5	4498.5		2126.6	2177.9	52.9	84.7	2920.4	2945.7	89.8	77.4	2151.8	2480	2360.1	2051.2	4315.4	1911	5360	1924.8		4179.8	4962.3		3193.7	4498.5		2126.6	2360.1		2786.3	2360.1
3278.1	4245.4	5620.3	5479.1	5620.3	3858.3	5479.1	3858.3	3901.3	4773.8	4512.4	4310.6	4112.7	4059.6	4608	4466.5		3774.7	3638	61.1	84.8	5072.6	6633.4	90.4	85.3	3799.9	4109.2	3554.3	3159.6	2749.9	1910.7	4432.6	1915.9		4245.4	4773.8		3858.3	4466.5		3774.7	3554.3		3525.4	3554.3
1293	2333.8	4849.7	3892.3	4849.7	2910.3	3892.3	2910.3	5623.4	7093.9	4763.8	3893.4	3879.4	4056.9	4648.3	4444.5		4651.9	4680.7	59.9	85.5	3848.2	4241.6	90.7	26.2	3345.6	3567.7	3014.9	2408.6	4168.1	1901.9	4081.5	1911		2333.8	7093.9		2910.3	4444.5		4651.9	3014.9		4369.7	3014.9
3734.8	4485.4	5460.4	5406.4	5460.4	3775.9	5406.4	3775.9	3896.1	4711.5	3406.5	4489	4131.5	4040.1	4781.4	4435.2		3298.6	3979.9	28.2	85.6	1640.5	1735.8	90.9	37.2	3452.3	3689.5	3876.4	2895.8	3609.3	1900.1	2569.6	1910.7		4485.4	4711.5		3775.9	4435.2		3298.6	3876.4		10483.9	3876.4
701.3	940.7	2773.4	2842.1	2773.4	1331.8	2842.1	1331.8	3932.5	4825	3873.5	4219.9	4251.7	4038.2	3956.4	4422.7		7753.1	8423.9	74.6	85.8	6720	7732.3	91.4	98.5	3211.1	3229.6	3134.3	2508.3	2421.5	1900	3422.1	1901.9		940.7	4825		1331.8	4422.7		7753.1	3134.3		8417.8	3134.3
3203.1	4155.4	4727	4495.9	4727	3380.1	4495.9	3380.1	3664.6	4681.9	4132.2	4597.2	3568.7	4033.5	5050.7	4414.1		8621.7	11475.4	60.1	85.8	5932.2	6982.6	91.4	69.2	4143.3	4384.1	4051.7	3365.2	6377	1892.4	2923.2	1900.1		4155.4	4681.9		3380.1	4414.1		8621.7	4051.7		13582.7	4051.7
2630.3	3213.9	3001.2	3013.2	3001.2	2822.9	3013.2	2822.9	3651.6	4603.2	2757.5	4168.9	4244.9	3991.7	4513.5	4393.2		3608.6	3543.6	73.8	85.9	5097.4	6256.8	92.2	83.7	3261.9	3325.7	3350.4	2776.2	3111.8	1889.5	2302.9	1900		3213.9	4603.2		2822.9	4393.2		3608.6	3350.4		3417.8	3350.4
3195.4	3957.6	4780.3	4731	4780.3	3373.2	4731	3373.2	3776.9	4572.9	4121.7	4412.6	3649.5	3974.3	4446.9	4386.7		6641.7	6559	87.6	86.3	3329.8	3577	92.7	87.8	6337	6576	5828.2	5135.4	4360.5	1883.9	5729.3	1892.4		3957.6	4572.9		3373.2	4386.7		6641.7	5828.2		6440.7	5828.2
3092.3	3771.3	4396.7	4287.2	4396.7	3190.8	4287.2	3190.8	3721	4535.7	4293.9	4202.1	4599.4	3958.3	4380.4	4363.3		5564.7	5540.1	71.2	86.9	5881.5	6151.8	93.9	80.7	5669.1	5926	5458.9	4994.4	4762.7	1882.8	2766.8	1889.5		3771.3	4535.7		3190.8	4363.3		5564.7	5458.9		6208.1	5458.9
1887.6	2857.8	4295.7	4303.7	4295.7	3103.6	4303.7	3103.6	3799.2	4566.7	4365.4	4127.8	4392.3	3936.1	4606.2	4353.5		3484.9	3344.1	96.2	87	9322	9335.6	94	74.2	2764.2	2927.6	2687	2340.2	2935.5	1875.7	3961.1	1883.9		2857.8	4566.7		3103.6	4353.5		3484.9	2687		3343.6	2687
3117.2	3706.7	4433.5	4319.5	4433.5	3259.6	4319.5	3259.6	3566.4	4371.8	3761.5	4012.7	3422	3911.9	4297.7	4352.5		6684.2	6607.8	69.6	87.1	1803.3	2227.4	95.4	106.9	7517.8	7346.4	7422.4	6337.7	2719.3	1872.4	3150.6	1882.8		3706.7	4371.8		3259.6	4352.5		6684.2	7422.4		6638.8	7422.4
2198.7	3277	4270	3976.4	4270	2924.1	3976.4	2924.1	3998.9	4870.4	4112.7	4343.3	4096.9	3910.7	4623.9	4350.6		3988.3	4122.6	70.7	87.1	4336.9	5153.7	95.6	91.4	3620.9	4029.3	3645.7	3197.5	3393.5	1864.9	2552.9	1875.7		3277	4870.4		2924.1	4350.6		3988.3	3645.7		4349.7	3645.7
2539.9	3266.8	4738.6	4759.7	4738.6	3100.9	4759.7	3100.9	3733.2	4565.1	3879.4	4094.9	4510.2	3895	4310.6	4306.9		2109.5	1973.6	67.7	87.7	3991	3961	96	88.5	2182.9	2331.7	2228.4	1927.4	5566.1	1849.4	2302.4	1872.4		3266.8	4565.1		3100.9	4306.9		2109.5	2228.4		1992.3	2228.4
3726.2	4972.9	5769.7	5546	5769.7	4038.8	5546	4038.8	4077.7	5074	4131.5	4363	3328.3	3889.7	3893.4	4284.7		8675.3	8258.5	89.5	88	3513.5	4129.7	96.3	89.7	7407.1	6911.5	6576.9	5360	5701.3	1846	3041.3	1864.9		4972.9	5074		4038.8	4284.7		8675.3	6576.9		7443.2	6576.9
1560.4	2148.4	2761.2	2833.7	2761.2	2388.5	2833.7	2388.5	3720.4	4524.8	4251.7	4058.2	3967.2	3878.6	4489	4278.4		7473.3	7412.3	60.6	88.2	5084.8	4055.4	96.3	33.3	6072.4	6078.9	5108.8	4432.6	2148.5	1840.4	4712.1	1849.4		2148.4	4524.8		2388.5	4278.4		7473.3	5108.8		7114.2	5108.8
2213.2	3009.9	4107.8	4083	4107.8	2961.7	4083	2961.7	3483	4140.6	3568.7	4094.8	4069.9	3877.5	4219.9	4211.3		6467.2	6283	74.9	88.5	2484.5	2576.5	96.8	91.3	5185.2	5851.5	4315.4	4081.5	12123.9	1835.6	4780.3	1846		3009.9	4140.6		2961.7	4211.3		6467.2	4315.4		7074.8	4315.4
1727	3452.6	4449.3	3495.7	4449.3	2771	3495.7	2771	5598.3	6979.1	4244.9	4076.5	3215.4	3867	4597.2	4181.7		3946.1	3702.1	87.2	88.8	3828	3303	97	13	3003.1	3328.3	2749.9	2569.6	3553.7	1823.4	1738.5	1840.4		3452.6	6979.1		2771	4181.7		3946.1	2749.9		3339.7	2749.9
993.1	1585	3370.1	2512.3	3370.1	1709.7	2512.3	1709.7	5174.2	6392.8	3649.5	4112.5	4196.3	3863.8	4168.9	4173.3		6508.2	6510.4	74.3	89.4	2713	3224.9	97.4	89.8	4757.9	5219.2	4168.1	3422.1	2632.1	1817.5	9467.2	1835.6		1585	6392.8		1709.7	4173.3		6508.2	4168.1		5951.1	4168.1
2059.5	2973.7	4553.9	4624.2	4553.9	3172.8	4624.2	3172.8	3436.8	4447.7	4599.4	4479.4	4366.8	3856.3	4412.6	4139.3		10024	10248.2	53.7	89.4	3875.1	4527.4	97.4	114.4	4422.5	4469	3609.3	2923.2	3065.4	1815	2973	1823.4		2973.7	4447.7		3172.8	4139.3		10024	3609.3		9045	3609.3
2097.2	2700.6	3703	3586.4	3703	2650.3	3586.4	2650.3	3469	4121.7	4392.3	4128.2	3477	3787.8	4202.1	4131.9		2311.2	2305.3	63.3	89.8	4076.7	4957.7	97.4	56	2431.4	2782.5	2421.5	2302.9	4147.1	1811.5	2152.1	1817.5		2700.6	4121.7		2650.3	4131.9		2311.2	2421.5		2872.3	2421.5
2892.5	3451.9	4557.3	4285.4	4557.3	3166	4285.4	3166	3465	4278.2	3422	4361.6	2225.4	3787.5	4127.8	4083.2		5050.9	5027.7	95	90.4	2724.3	2472	97.7	81.2	5832.1	5899.6	6377	5729.3	6784.4	1809.4	2672.8	1815		3451.9	4278.2		3166	4083.2		5050.9	6377		6039.5	6377
1324.6	2040.5	4062.9	3979.7	4062.9	2505.9	3979.7	2505.9	3602	4312.7	4096.9	4125.8	2626.5	3783.9	4012.7	4069.6		4131.5	4349	29.1	90.7	10138.7	11836.9	97.9	85.1	3284.1	3550.9	3111.8	2766.8	904.1	1808.3	3471.9	1811.5		2040.5	4312.7		2505.9	4069.6		4131.5	3111.8		6022.4	3111.8
2626.6	3560.8	4044.4	4049.9	4044.4	2891.7	4049.9	2891.7	3748	4654.7	4510.2	4182.3	2265.4	3762.3	4343.3	4059.6		4302.9	4123.4	25.7	90.9	2151.5	2764.5	98.3	108.7	4545.1	4813.7	4360.5	3961.1	5520.4	1806.3	3046.3	1809.4		3560.8	4654.7		2891.7	4059.6		4302.9	4360.5		4599.9	4360.5
2426.2	3375.2	3920.7	3939.9	3920.7	3040.7	3939.9	3040.7	3590.3	4404.1	3328.3	4058.9	3791.9	3749.8	4094.9	4056.9		5293.3	6256.8	74.1	91.4	1935.6	2235.9	98.3	85.7	3951.4	4136	4762.7	3150.6	4510.3	1795.4	728.7	1808.3		3375.2	4404.1		3040.7	4056.9		5293.3	4762.7		10914.2	4762.7
1626.6	2204.6	2562.8	2285.6	2562.8	2226.2	2285.6	2226.2	3137.8	4084.9	3967.2	3926.8	3360.8	3722.1	4363	4040.1		2882.4	2727.9	59.3	91.4	6498	6581.2	99.6	80.2	2884.9	3125.8	2935.5	2552.9	2813.5	1794.5	4634.2	1806.3		2204.6	4084.9		2226.2	4040.1		2882.4	2935.5		4286	2935.5
2632.1	3493.6	3800.6	3774.1	3800.6	2926.7	3774.1	2926.7	3473.7	4313.4	4069.9	4114.9	3978.4	3721	4058.2	4038.2		3534	3755.3	82.9	92.2	1966.1	3069.3	100.4	97.1	2601.4	2780.6	2719.3	2302.4	1599.7	1790.4	3956.6	1795.4		3493.6	4313.4		2926.7	4038.2		3534	2719.3		4074.2	2719.3
1802.4	2758.3	4434.6	4465.1	4434.6	3144.4	4465.1	3144.4	3438.2	4334	3215.4	4218.7	3239.1	3707.2	4094.8	4033.5		3413.7	3239.1	93	92.7	2975.4	4093.1	100.6	85.1	3533.3	3912.6	3393.5	3041.3	5280.7	1787.3	2436	1794.5		2758.3	4334		3144.4	4033.5		3413.7	3393.5		3296	3393.5
3606.4	4231.5	5148	4958.1	5148	3497.8	4958.1	3497.8	3518	4331.9	4196.3	4125.3	4067.9	3706.3	4076.5	3991.7		4702.6	4729.5	63.7	93.9	679.9	738.3	100.6	83.9	5562.8	5457.8	5566.1	4712.1	2747.5	1779.9	1400.3	1790.4		4231.5	4331.9		3497.8	3991.7		4702.6	5566.1		4865.7	5566.1
1637.6	2683.4	3928.3	3957.1	3928.3	2607.2	3957.1	2607.2	3335.7	4013.3	4366.8	4146.1	3904.4	3687.7	4112.5	3974.3		4938	4967.4	76.5	94	4104.2	4585	100.8	109.6	5750.3	5533.4	5701.3	4780.3	2697.2	1773.6	4457.4	1787.3		2683.4	4013.3		2607.2	3974.3		4938	5701.3		5592.1	5701.3
3440.8	4114.8	4817.1	4460.6	4817.1	3291.4	4460.6	3291.4	3886.9	4833.4	3477	3897.6	1938	3665.3	4479.4	3958.3		2942.1	2764.3	94.2	95.4	3588.3	4404.8	100.9	127.6	2210.6	2393.1	2148.5	1738.5	3663.8	1764.9	1958.3	1779.9		4114.8	4833.4		3291.4	3958.3		2942.1	2148.5		2482.7	2148.5
2799.4	3623.8	4455.8	4445.6	4455.8	3205.6	4445.6	3205.6	3283.1	4041.2	2225.4	3832.5	2913	3627.2	4128.2	3936.1		12857.3	11667.7	82	95.6	2705.6	2883.4	101	79.5	12492.3	11518.3	12123.9	9467.2	3736	1763.7	2154.6	1773.6		3623.8	4041.2		3205.6	3936.1		12857.3	12123.9		11318.3	12123.9
2158.1	2904.3	4560.7	4622.8	4560.7	3077.1	4622.8	3077.1	3330.3	4015.9	2626.5	3790.7	4053.4	3607.1	4361.6	3911.9		2748.6	2737.5	77.4	96	1983	2028.9	101.4	53.1	3627.6	3494	3553.7	2973	6045	1759.9	3149.6	1764.9		2904.3	4015.9		3077.1	3911.9		2748.6	3553.7		2932.6	3553.7
3282.8	3864.7	4502.6	4286.6	4502.6	3119.3	4286.6	3119.3	3534.9	4313.1	2265.4	3540.5	1854.8	3604.9	4125.8	3910.7		2380.3	2368	77.1	96.3	3889.8	4778.9	101.7	110.2	2261.9	2543.4	2632.1	2152.1	5299.8	1727.4	3108.3	1763.7		3864.7	4313.1		3119.3	3910.7		2380.3	2632.1		3438.9	2632.1
3347.2	3848.2	4608.3	4493.7	4608.3	3269.8	4493.7	3269.8	3457.3	4202.5	3791.9	3952	3849.5	3588.8	4182.3	3895		7019.1	7431.1	24.4	96.3	3847.6	3842.4	102.9	83.1	4054.5	4233.3	3065.4	2672.8	4117.6	1724.3	5060.1	1759.9		3848.2	4202.5		3269.8	3895		7019.1	3065.4		6740.3	3065.4
1142.5	1907.8	4330.1	4224.3	4330.1	2787.2	4224.3	2787.2	3362.7	3974.6	3360.8	3783.9	2405.3	3574.1	4058.9	3889.7		4142.4	3818.5	91.1	96.8	1944.1	1843	103	94.6	3787.5	3737.3	4147.1	3471.9	5674.1	1722.4	4357	1727.4		1907.8	3974.6		2787.2	3889.7		4142.4	4147.1		5888.7	4147.1
2016.7	2895.7	4223.7	4147.7	4223.7	2856	4147.7	2856	3428.5	4112.6	3978.4	4021.5	4116.2	3518.1	3926.8	3878.6		6282	7355.2	13.1	97	2848	3346.5	105.7	87.2	5719.9	5853.1	6784.4	3046.3	2556.4	1718.6	3630.4	1724.3		2895.7	4112.6		2856	3878.6		6282	6784.4		17560.3	6784.4
2297.2	3447.7	4750.6	3968.3	4750.6	3732.6	3968.3	3732.6	5070.1	6439	3239.1	3936.5	3613.4	3502.1	4114.9	3877.5		860.3	844.4	75.5	97.4	3180.5	3071.9	105.8	109.9	758.8	888.7	904.1	728.7	2799.8	1715	4875.2	1722.4		3447.7	6439		3732.6	3877.5		860.3	904.1		848.9	904.1
1436.4	1940.3	3457.8	3347.7	3457.8	2124.5	3347.7	2124.5	3595.1	4369	4067.9	4365.5	4059.8	3495.8	4218.7	3867		4091.5	4277.3	118.1	97.4	4879.5	5767.7	106.2	59	5331.9	5354.5	5520.4	4634.2	2610	1697.7	2373.2	1718.6		1940.3	4369		2124.5	3867		4091.5	5520.4		5143.8	5520.4
2561.2	3275.6	4147.7	4035.6	4147.7	2817.3	4035.6	2817.3	3352.9	4031.7	3904.4	3562.6	5977.3	3473.6	4125.3	3863.8		4598.6	4262	76.5	97.4	4415.6	4906.5	106.4	110.5	4560.9	4784	4510.3	3956.6	3438.3	1692.2	2413.4	1715		3275.6	4031.7		2817.3	3863.8		4598.6	4510.3		5317.6	4510.3
2991.1	3886.7	4482.1	4509.2	4482.1	3202.7	4509.2	3202.7	3654.1	4405	1938	3355.3	3804.5	3468.8	4146.1	3856.3		2970	2987.2	69.4	97.7	3671.2	3937.7	106.5	97.8	2876.9	3072.5	2813.5	2436	2283.4	1681	2263.9	1697.7		3886.7	4405		3202.7	3856.3		2970	2813.5		2819.8	2813.5
1690.2	2369.4	3313.6	3356.1	3313.6	2498.4	3356.1	2498.4	3156	3885	2913	3550.6	3222.6	3467.3	3897.6	3787.8		2147.3	2203.8	80.2	97.9	4061.9	5397.6	106.6	93.7	1486.8	1884.9	1599.7	1400.3	4725.8	1670.9	3045.1	1692.2		2369.4	3885		2498.4	3787.8		2147.3	1599.7		2136.4	1599.7
841.1	1246.5	4003	4044.1	4003	2171.5	4044.1	2171.5	3199.9	3893.7	4053.4	3897.2	3745.1	3464.4	3832.5	3787.5		5198.8	4772.9	102.2	98.3	6901.8	6588.6	106.8	99.9	5516.1	5231.6	5280.7	4457.4	5362.7	1666.4	1970	1681		1246.5	3893.7		2171.5	3787.5		5198.8	5280.7		4989.4	5280.7
1222.1	1695.3	3731	3710.1	3731	2112.2	3710.1	2112.2	3219.8	3865.3	1854.8	2913	3885.8	3449.4	3790.7	3783.9		4268.3	4472.2	93.7	98.3	5386	5526.2	107.1	99	2650.8	2800.2	2747.5	1958.3	2369.4	1656.3	4113.4	1670.9		1695.3	3865.3		2112.2	3783.9		4268.3	2747.5		4091.6	2747.5
839.9	1283.8	3225.1	3327	3225.1	2072.2	3327	2072.2	3240.2	3936.7	3849.5	3663.4	2411.6	3432.6	3540.5	3762.3		2175.8	2083.8	54.9	99.6	10381.6	9855	107.4	81.8	2447.2	2646.8	2697.2	2154.6	3343.8	1650.2	4410.4	1666.4		1283.8	3936.7		2072.2	3762.3		2175.8	2697.2		1922.7	2697.2
2626.4	3638.4	3928.6	4008.1	3928.6	3000.1	4008.1	3000.1	3407.3	4103.6	2405.3	3597.6	1988.7	3419.7	3952	3749.8		3586.6	3486	81.4	100.4	4357.1	4831.8	108.3	97.6	3664.9	3803.1	3663.8	3149.6	2821.4	1646	1923.6	1656.3		3638.4	4103.6		3000.1	3749.8		3586.6	3663.8		3816.3	3663.8
1221.1	2197.6	4555	4673.5	4555	3200.7	4673.5	3200.7	3166.7	3891.4	4116.2	3801.2	3425.8	3414.8	3783.9	3722.1		3617.4	3557.8	65.5	100.6	6346.9	5325.7	108.6	93.7	3650.5	4027.3	3736	3108.3	3413.8	1640.2	2801.2	1650.2		2197.6	3891.4		3200.7	3722.1		3617.4	3736		4149.3	3736
2176.6	2680.7	3641.2	3702.9	3641.2	2660.7	3702.9	2660.7	3066.8	3705	3613.4	3705.5	1207.4	3410.4	4021.5	3721		6088.7	5762.2	75.6	100.6	6553.2	6681.7	109.5	111.2	6220.1	6380.1	6045	5060.1	3252.4	1629.8	2576.4	1646		2680.7	3705		2660.7	3721		6088.7	6045		5752.2	6045
737.1	3600.9	4641.4	2437.4	4641.4	3822.3	2437.4	3822.3	6349.3	8100.4	4059.8	3911.5	1882.5	3394.6	3936.5	3707.2		4767.7	4859.9	99.4	100.8	5316	5859.1	109.8	111.6	5264	4833.4	5299.8	4357	2746.1	1628.1	2889.6	1640.2		3600.9	8100.4		3822.3	3707.2		4767.7	5299.8		4628.3	5299.8
1516.3	2144.2	3299.1	3049.1	3299.1	2274.5	3049.1	2274.5	2982.3	3603.9	5977.3	4415.4	3562.7	3393.4	4365.5	3706.3		4060.6	4072.3	99.3	100.9	4194	3591.4	109.9	83.2	4074.2	4277.3	4117.6	3630.4	3592.3	1624.5	2800.5	1629.8		2144.2	3603.9		2274.5	3706.3		4060.6	4117.6		4533.3	4117.6
2614.1	3370	4040	4134	4040	2928.8	4134	2928.8	3369.2	4019.9	3804.5	3293.7	3715.1	3391	3562.6	3687.7		5338.1	5236.6	114.3	101	8264.6	8390.8	110	87.9	5929.1	5215	5674.1	4875.2	6698	1623.2	2310.1	1628.1		3370	4019.9		2928.8	3687.7		5338.1	5674.1		6683.9	5674.1
1061	1927.9	3321.3	3647.1	3321.3	2648.3	3647.1	2648.3	3066.8	3282	3222.6	2059.7	4089	3375.6	3355.3	3665.3		7411.2	7039.4	47.5	101.4	2072.7	2642.6	110.2	108.2	2967.1	3258.8	2556.4	2373.2	3556.6	1618.6	2998.6	1624.5		1927.9	3282		2648.3	3665.3		7411.2	2556.4		6646.4	2556.4
1568	2043.9	3420.3	3387.7	3420.3	2245.6	3387.7	2245.6	2941.3	3637.4	3745.1	3540	3367.8	3348.4	3550.6	3627.2		5953.3	5898.9	94.8	101.7	2447.2	2983.2	110.3	111.5	3284.9	3557.1	2799.8	2413.4	2658.7	1616.8	5636.2	1623.2		2043.9	3637.4		2245.6	3627.2		5953.3	2799.8		5559.6	2799.8
2539.5	3072	3923.2	3840.8	3923.2	2685.2	3840.8	2685.2	3025.2	3832.1	3885.8	3669.2	3891.3	3335.1	3897.2	3607.1		11082.8	11550.8	62.2	102.9	2582.5	2718.9	110.4	77.5	3146.8	3272	2610	2263.9	1406.1	1613.9	2986	1618.6		3072	3832.1		2685.2	3607.1		11082.8	2610		10462.4	2610
515.1	1031.6	3285.2	3080.9	3285.2	1856.4	3080.9	1856.4	3370.1	4091.9	2411.6	3149.2	1608.7	3334.1	2913	3604.9		5231.6	4982.5	97.4	103	2689.4	3115.3	110.5	86.3	3863	4360.3	3438.3	3045.1	2419.1	1601.4	2327.1	1616.8		1031.6	4091.9		1856.4	3604.9		5231.6	3438.3		5295.3	3438.3
2651.5	3158.2	3864.8	3776.1	3864.8	2747	3776.1	2747	3014.5	3657.7	1988.7	2929.8	1702.5	3329.4	3663.4	3588.8		6219.4	6754.2	81.2	105.7	5469.3	5847.7	110.5	111.7	2345	2565.6	2283.4	1970	4870.1	1600.6	1285.8	1613.9		3158.2	3657.7		2747	3588.8		6219.4	2283.4		5743.8	2283.4
519.6	704.9	2296.5	2270.7	2296.5	1291.8	2270.7	1291.8	3036.2	3728.7	3425.8	3403.3	622	3325.6	3597.6	3574.1		7170.8	6953.1	99.8	105.8	4503.7	5656.6	110.8	115.4	5826.3	5580.7	4725.8	4113.4	8598.1	1588.5	1983.1	1601.4		704.9	3728.7		1291.8	3574.1		7170.8	4725.8		6652.6	4725.8
2223.1	3200.8	3562.8	3450.4	3562.8	2506.8	3450.4	2506.8	3125.4	3867	1207.4	2450.8	2792.3	3305.7	3801.2	3518.1		6530.2	6167.3	53.1	106.2	8343.9	6092.5	111.2	88.3	5776	5387.1	5362.7	4410.4	2346.5	1576.7	4035.8	1600.6		3200.8	3867		2506.8	3518.1		6530.2	5362.7		6240.4	5362.7
2334.4	2748	3698.7	3733.1	3698.7	2487.9	3733.1	2487.9	3077.8	3653.2	1882.5	2689.6	3680.1	3293.8	3705.5	3502.1		4405.4	4279.4	82.6	106.4	2860.6	3292.7	111.9	112.4	2421.5	2651.7	2369.4	1923.6	3257.3	1573.1	7207.8	1588.5		2748	3653.2		2487.9	3502.1		4405.4	2369.4		3910.8	2369.4
2209.9	2722	3076.8	2952.3	3076.8	2231.9	2952.3	2231.9	3179.8	3900.6	3562.7	3510.2	3346	3293.6	3911.5	3495.8		9067.1	9093.5	86.9	106.5	875	1077.2	112.4	83.2	3920.4	4208.1	3343.8	2801.2	2027.9	1572.5	2016.5	1576.7		2722	3900.6		2231.9	3495.8		9067.1	3343.8		8341.3	3343.8
3757.8	2783.8	5571.9	6006	5571.9	4081.1	6006	4081.1	2458.6	2706.4	3715.1	3812.1	2668.9	3286.8	4415.4	3473.6		2600.6	2495	86.8	106.6	1904.7	2146.1	113.5	118.8	2905.9	3134.9	2821.4	2576.4	3044.5	1572	2923.4	1573.1		2783.8	2706.4		4081.1	3473.6		2600.6	2821.4		2627.6	2821.4
2583	3008.6	3672.5	3643.6	3672.5	2620.7	3643.6	2620.7	2788.2	3443.4	4089	3836.9	3833.1	3283.6	3293.7	3468.8		3036.9	2999.6	75.6	106.8	5981.5	6218.5	113.8	128	3598.4	3719.3	3413.8	2889.6	2551.5	1571.4	1740.5	1572.5		3008.6	3443.4		2620.7	3468.8		3036.9	3413.8		3061.2	3413.8
1392.8	2035.8	4325.2	3993.9	4325.2	2678.5	3993.9	2678.5	2760.7	3750.5	3367.8	3143.5	3076.8	3263.1	2059.7	3467.3		2767	2799.8	73.5	107.1	7174.3	8570.5	113.9	89	3033.1	3214.3	3252.4	2800.5	3043	1571.2	2318.6	1572		2035.8	3750.5		2678.5	3467.3		2767	3252.4		2613.1	3252.4
2928.7	3327.8	3839.5	3857.2	3839.5	2791.3	3857.2	2791.3	3079.8	3692.2	3891.3	3842	3676.9	3261.1	3540	3464.4		3380.8	3234.5	79.8	107.4	18294.5	10586.8	114.2	106.4	2922.2	3238.6	2746.1	2310.1	4820.3	1569	2073.2	1571.4		3327.8	3692.2		2791.3	3464.4		3380.8	2746.1		3176.7	2746.1
2958.6	3433.3	4247.9	4187.4	4247.9	2951.6	4187.4	2951.6	2967.6	3653.8	1608.7	2913.8	3312.2	3240.2	3669.2	3449.4		6449.5	6523.9	106.8	108.3	3083.6	3545.2	114.8	106.2	4572.4	4775.5	3592.3	2998.6	2457.5	1560.3	2630.1	1571.2		3433.3	3653.8		2951.6	3449.4		6449.5	3592.3		6229.4	3592.3
1146.1	1463.8	2955.6	2941	2955.6	1742.7	2941	1742.7	2947.5	3599.5	1702.5	3236.7	2498.4	3239.1	3149.2	3432.6		5552.9	5392.4	68.1	108.6	1516.6	1760.6	115.2	95.5	6700	6107.6	6698	5636.2	4274.6	1559.2	4070	1569		1463.8	3599.5		1742.7	3432.6		5552.9	6698		6200.5	6698
919.2	1171.5	2555.7	2517.5	2555.7	1402.5	2517.5	1402.5	2925.5	3585.6	622	2810.8	2656.6	3238.9	2929.8	3419.7		7103.5	8092.4	96.8	109.5	4657.1	4970.3	115.3	103.5	3660.2	3576.4	3556.6	2986	3832.8	1550.7	2166.9	1560.3		1171.5	3585.6		1402.5	3419.7		7103.5	3556.6		6816.1	3556.6
2154.6	2643.7	3368.3	3282.8	3368.3	2571.4	3282.8	2571.4	2896.2	3562.9	2792.3	2661.4	3437.4	3230.3	3403.3	3414.8		3331.2	3347	135.6	109.8	2850.4	2741.4	116.2	92.3	2724	3124.2	2658.7	2327.1	3146.4	1549.8	3598.4	1559.2		2643.7	3562.9		2571.4	3414.8		3331.2	2658.7		3323.1	2658.7
556.5	792.4	2585.6	2653.3	2585.6	1263.3	2653.3	1263.3	3454	4197.4	3680.1	3514.1	2121.6	3187.6	2450.8	3410.4		1146	1063.7	85.8	109.9	3379.2	3727.4	116.3	98.9	1391.3	1506.2	1406.1	1285.8	3405.8	1544.9	3300.8	1550.7		792.4	4197.4		1263.3	3410.4		1146	1406.1		1181	1406.1
861.5	1264.6	2955.3	3008.9	2955.3	1611.4	3008.9	1611.4	3194.3	3743.5	3346	3200.6	3052.7	3186.2	2689.6	3394.6		2181	2130.5	115.6	110	3930	4751	116.8	84.4	2184.9	2169.4	2419.1	1983.1	3209	1533.8	2667	1549.8		1264.6	3743.5		1611.4	3394.6		2181	2419.1		2129.7	2419.1
2243.2	3076	3451.4	3285.8	3451.4	2596.4	3285.8	2596.4	2901.5	3606.1	2668.9	3149.3	3494.2	3185.5	3510.2	3393.4		6602.8	6354.4	125.4	110.2	2095.6	2276.2	116.9	109.2	5440.7	5395.9	4870.1	4035.8	4137.7	1530	2757.1	1544.9		3076	3606.1		2596.4	3393.4		6602.8	4870.1		5994.3	4870.1
1899	2536.1	3424.6	3402.6	3424.6	2377.2	3402.6	2377.2	2969.1	3629.3	3833.1	3532.8	2671.8	3178.1	3812.1	3391		9063.5	8535.5	111.1	110.3	3491.7	4051.5	117.3	104.9	9566.6	9008.7	8598.1	7207.8	4670.4	1526.3	2981	1533.8		2536.1	3629.3		2377.2	3391		9063.5	8598.1		8375.3	8598.1
2892.4	3679.8	5194.9	4719.9	5194.9	3442.7	4719.9	3442.7	3094.7	3763	3076.8	3303.8	2901.9	3174.9	3836.9	3375.6		12784.5	17660.8	73.6	110.4	7203.5	7285	117.4	93.8	2604.4	2540.2	2346.5	2016.5	4166.9	1526.1	1949.3	1530		3679.8	3763		3442.7	3375.6		12784.5	2346.5		15127.9	2346.5
808.8	1356.9	2653.3	2671.2	2653.3	1751.4	2671.2	1751.4	2920.9	3708.4	3676.9	3329.4	3310.3	3171.8	3143.5	3348.4		4223.5	4090.1	82	110.5	2300.4	2684.5	118.4	105.3	3691	4169.2	3257.3	2923.4	2519.4	1524.6	3742.9	1526.3		1356.9	3708.4		1751.4	3348.4		4223.5	3257.3		4924.2	3257.3
2427.1	3036.1	3436.4	3362.7	3436.4	2433.8	3362.7	2433.8	2883.7	3538	3312.2	3533.8	3391	3163.6	3842	3335.1		1912.9	1881.3	102	110.5	12045.7	9243.5	119.7	110.1	1900.6	2094.2	2027.9	1740.5	5711.8	1516.7	3339.4	1526.1		3036.1	3538		2433.8	3335.1		1912.9	2027.9		1800.8	2027.9
552	950.3	2613.6	2443.3	2613.6	1251.7	2443.3	1251.7	3538.1	4181.7	2498.4	3436.7	3048.2	3158.5	2913.8	3334.1		6641.9	5686.7	102.5	110.8	2442.4	2722.8	119.9	100	4141.9	3640	3044.5	2318.6	2948.7	1503.5	2091.3	1524.6		950.3	4181.7		1251.7	3334.1		6641.9	3044.5		4570.1	3044.5
558.2	716.5	1651	1484.2	1651	1001.7	1484.2	1001.7	2847.4	3529.8	2656.6	2441.2	1211.3	3152.2	3236.7	3329.4		3273.6	3035	90.8	111.2	1461.7	2185.6	120.2	131.3	2419.4	2592.8	2551.5	2073.2	1129.5	1497.4	5015.5	1516.7		716.5	3529.8		1001.7	3329.4		3273.6	2551.5		2928.6	2551.5
123.3	226.4	1596.9	1690	1596.9	576.2	1690	576.2	2859.7	3332.6	3437.4	3296.8	2447.2	3138.6	2810.8	3325.6		3856.7	4048	115.4	111.9	4375.3	5178.2	120.8	100.6	3059.3	3342.1	3043	2630.1	2927.9	1491.4	2522.4	1503.5		226.4	3332.6		576.2	3325.6		3856.7	3043		6149.5	3043
1019.7	1866.5	3653.6	3861.1	3653.6	2675	3861.1	2675	2418.6	3071.7	2121.6	3081.2	2939.4	3138.1	2661.4	3305.7		5213.8	5026.9	79.2	112.4	3614.4	4758.8	123.8	105	5334.8	5284.2	4820.3	4070	4170.6	1486.8	1195.7	1497.4		1866.5	3071.7		2675	3305.7		5213.8	4820.3		4740.8	4820.3
2630.3	2936.6	3322.5	3205.9	3322.5	2349.3	3205.9	2349.3	2901.1	3547.5	3052.7	3296.2	1640.8	3112.7	3514.1	3293.8		2512.4	2227.3	119.1	113.5	2142.4	2515.8	124.2	122.5	2289.7	2607	2457.5	2166.9	2071.5	1480.3	2616.8	1491.4		2936.6	3547.5		2349.3	3293.8		2512.4	2457.5		2755.2	2457.5
2042.8	2355.8	2580.3	2564.7	2580.3	2265.2	2564.7	2265.2	2705	3297.3	3494.2	3411.2	3537.6	3108.4	3200.6	3293.6		4261.1	4172.5	130.9	113.8	5000.9	5266.2	124.5	87.2	4425.2	4574.1	4274.6	3598.4	3355.4	1476.7	3510.6	1486.8		2355.8	3297.3		2265.2	3293.6		4261.1	4274.6		3936.7	4274.6
972.3	1482.7	2456.5	2409.5	2456.5	1669.9	2409.5	1669.9	2824.2	3351.9	2671.8	3260.3	3015.6	3090.7	3149.3	3286.8		7878	7804.1	92.7	113.9	2345.4	2909.6	124.9	111.1	4158.9	4249.6	3832.8	3300.8	4539.4	1471.7	1705.1	1480.3		1482.7	3351.9		1669.9	3286.8		7878	3832.8		8674.7	3832.8
2250.9	3148.9	3697.3	3510.4	3697.3	2515.1	3510.4	2515.1	2851.7	3513.9	2901.9	3259.6	2704.7	3087.2	3532.8	3283.6		2782.1	2750.3	106.9	114.2	683.1	1067	125.7	132	3047.9	3101.5	3146.4	2667	7174	1470.1	2625	1476.7		3148.9	3513.9		2515.1	3283.6		2782.1	3146.4		2752.6	3146.4
2517.3	3291.1	4033.9	3917.4	4033.9	2736.2	3917.4	2736.2	3184.1	3898.7	3310.3	3460.8	3303.9	3078.2	3303.8	3263.1		10894	12806.6	99.1	114.8	4104.9	4527	126	113.8	4321.2	4382.3	3405.8	2757.1	2027	1464.6	3805.9	1471.7		3291.1	3898.7		2736.2	3263.1		10894	3405.8		10742.4	3405.8
2489.6	2967.8	3278.7	3293.3	3278.7	2415.9	3293.3	2415.9	2782.1	3433	3391	3315.8	3332.8	3077.6	3329.4	3261.1		2762	2743.7	152.8	115.2	17830.2	14412	126.5	102.4	3202.1	3428.6	3209	2981	4297.5	1463.2	5785.3	1470.1		2967.8	3433		2415.9	3261.1		2762	3209		3314.2	3209
1369	2111.5	3021.9	2934.4	3021.9	2114.9	2934.4	2114.9	2718.9	3272.1	3048.2	3405.1	3278.9	3075.8	3533.8	3240.2		3112.7	3699.9	78.4	115.3	5188.2	4979.2	126.6	118.6	3283.7	3361.4	4137.7	1949.3	654	1463	1654	1464.6		2111.5	3272.1		2114.9	3240.2		3112.7	4137.7		9075.6	4137.7
1460.3	2130.4	4708.3	4655.3	4708.3	2638.5	4655.3	2638.5	3215.8	3799.5	1211.3	2114.4	2342.4	3074.8	3436.7	3239.1		5688	5393.8	61.3	116.2	2444.2	2956.8	126.9	111.4	4762.5	4780.6	4670.4	3742.9	2447.9	1457.5	3690.4	1463.2		2130.4	3799.5		2638.5	3239.1		5688	4670.4		4863.2	4670.4
1599.1	2007.4	1939.1	1963.1	1939.1	1985.4	1963.1	1985.4	2342.1	3139.7	2447.2	3222	3067.2	3072.9	2441.2	3238.9		4903	4568.7	95	116.3	2842.3	3619	127.1	98.9	4522.1	4391.6	4166.9	3339.4	2299.7	1456.9	416	1463		2007.4	3139.7		1985.4	3238.9		4903	4166.9		4910	4166.9
2692.4	3289.4	3903.2	3819.2	3903.2	2759.3	3819.2	2759.3	2866.7	3527.4	2939.4	3132.1	2843.7	3072.6	3296.8	3230.3		2687.1	2530.4	133.4	116.8	4872.9	6069.9	127.2	138.8	2377.3	2550.4	2519.4	2091.3	3780.4	1456.7	2149	1457.5		3289.4	3527.4		2759.3	3230.3		2687.1	2519.4		2970.6	2519.4
1071.4	1570.8	3418.6	3529.5	3418.6	2186.7	3529.5	2186.7	2528.6	3046.1	1640.8	2707	2672.1	3058.1	3081.2	3187.6		5967.6	5614.4	105.6	116.9	1246.4	1477.8	127.3	84.2	5881.2	6305.3	5711.8	5015.5	3772.9	1446.3	2049.3	1456.9		1570.8	3046.1		2186.7	3187.6		5967.6	5711.8		5028.5	5711.8
1738.9	2064.4	3183.5	3187.5	3183.5	2099.8	3187.5	2099.8	2582.7	3152.1	3537.6	3254.3	3084.7	3044.9	3296.2	3186.2		2962.5	2948.2	108.6	117.3	7024.8	7044.5	127.6	114.6	3090	3192.4	2948.7	2522.4	2616.4	1440.6	3453.2	1456.7		2064.4	3152.1		2099.8	3186.2		2962.5	2948.7		2929.2	2948.7
2464.7	3057.8	3671	3346.6	3671	2622.9	3346.6	2622.9	3128.7	3792.9	3015.6	3042.8	1128.1	3035.6	3411.2	3185.5		880.3	814.1	74.7	117.4	552.8	422.3	127.8	56.8	1214.4	1744.3	1129.5	1195.7	2782.2	1436.4	3139.5	1446.3		3057.8	3792.9		2622.9	3185.5		880.3	1129.5		1257.9	1129.5
1247	1721.2	3265.9	3230.4	3265.9	2010.8	3230.4	2010.8	2753.6	3489.2	2704.7	3004.8	3267.2	3035	3260.3	3178.1		4685.7	4721.7	104.6	118.4	2233.7	2371.9	128.2	125.1	3042.6	3557.9	2927.9	2616.8	3559.7	1427.9	2332.2	1440.6		1721.2	3489.2		2010.8	3178.1		4685.7	2927.9		5150.5	2927.9
1126.9	1360.9	2287.5	2319.6	2287.5	1581.9	2319.6	1581.9	2692.4	3230.6	3303.9	3106.7	1868.8	3033.8	3259.6	3174.9		15646	19539.8	133	119.7	1755.7	2107.2	128.2	133.3	5305.7	5229.7	4170.6	3510.6	3136.7	1421.7	2700.4	1436.4		1360.9	3230.6		1581.9	3174.9		15646	4170.6		16836.8	4170.6
2897.2	3364.2	3674.8	3617.4	3674.8	2581.2	3617.4	2581.2	2908.6	3514.3	3332.8	3500.6	2641.2	3031.6	3460.8	3171.8		5640.8	5509.5	89.5	119.9	2973.6	3337	128.3	105.6	2333	2590.9	2071.5	1705.1	2394.2	1420.8	3070.2	1427.9		3364.2	3514.3		2581.2	3171.8		5640.8	2071.5		4931.4	2071.5
1821.4	2386.2	3265.3	3140.8	3265.3	2374.2	3140.8	2374.2	2634.4	3212.4	3278.9	3320.4	2502.4	3028.2	3315.8	3163.6		3298.4	3197.1	103.7	120.2	4446.2	4918	128.7	121.3	3398.6	3336.9	3355.4	2625	3369.7	1420.2	2573.5	1421.7		2386.2	3212.4		2374.2	3163.6		3298.4	3355.4		3040.7	3355.4
1679.3	2149.9	3187.6	3206.7	3187.6	2116.6	3206.7	2116.6	2664.7	3235.5	2342.4	3007.8	3125.5	3010	3405.1	3158.5		3735.9	3547.4	106.5	120.8	1776.4	2263.5	129	101.5	4507.4	4542.5	4539.4	3805.9	2640.1	1419.7	1788.2	1420.8		2149.9	3235.5		2116.6	3158.5		3735.9	4539.4		3695.2	4539.4
569	806.1	2201.1	2238.8	2201.1	1075.2	2238.8	1075.2	2789.7	3444.9	3067.2	3302.4	2837.5	3002.5	2114.4	3152.2		5815.1	5783.3	117.3	123.8	3351.7	3556.6	129.1	33.3	7323.2	6546	7174	5785.3	3681.7	1417.7	4358.1	1420.2		806.1	3444.9		1075.2	3152.2		5815.1	7174		6287.5	7174
666.4	1009.4	1915.3	1913.6	1915.3	1245.3	1913.6	1245.3	2588.2	3111.4	2843.7	2931.9	2508.4	3001.2	3222	3138.6		1545.4	1540.8	144.4	124.2	4513.2	4744.9	129.4	130.5	1871.5	2072.8	2027	1654	2546.6	1416.5	2225.7	1419.7		1009.4	3111.4		1245.3	3138.6		1545.4	2027		1570.9	2027
1436.1	1791.1	2341.6	2282.1	2341.6	1845.4	2282.1	1845.4	2564	3203.9	2672.1	3108.2	3476.7	2997.5	3132.1	3138.1		6662.6	7748	86.5	124.5	8163.4	8532.8	129.6	126.6	5584.4	5973.4	4297.5	3690.4	2149.5	1414	3145.5	1417.7		1791.1	3203.9		1845.4	3138.1		6662.6	4297.5		9205	4297.5
1318.1	1484	3861.3	3809.4	3861.3	1664.7	3809.4	1664.7	2985.6	3498.4	3084.7	2886.2	3336.7	2997.5	2707	3112.7		566.6	551	104.1	124.9	1766.6	1987.7	130.9	132.6	417.8	457	654	416	4521.2	1412	2206.7	1416.5		1484	3498.4		1664.7	3112.7		566.6	654		472.7	654
2101.9	2997.7	3629.8	3491.7	3629.8	2471.8	3491.7	2471.8	2118.7	3164.5	1128.1	2270.5	3797.1	2988.1	3254.3	3108.4		2288.8	2383.7	122.4	125.7	3348	4766	130.9	105.2	2257.4	2438.3	2447.9	2149	3103.1	1404.7	1944.4	1414		2997.7	3164.5		2471.8	3108.4		2288.8	2447.9		4595.3	2447.9
1429.4	1856.7	2987	2869	2987	1970.7	2869	1970.7	2589.3	3210	3267.2	3094.7	3212.1	2980.6	3042.8	3090.7		2097.4	2038.2	85.9	126	2000.3	2304.8	131	31.4	2306	2439.7	2299.7	2049.3	3712.8	1404	3830.2	1412		1856.7	3210		1970.7	3090.7		2097.4	2299.7		1973.9	2299.7
1173.4	2234.2	3404.8	2815.5	3404.8	2086.2	2815.5	2086.2	3719.1	4605.5	1868.8	2710.6	2902	2977.7	3004.8	3087.2		2962.1	2909.6	88.5	126.5	2465.1	3271.6	131.3	105.1	3561.5	3561.4	3780.4	3453.2	3258.7	1402.6	2487.8	1404.7		2234.2	4605.5		2086.2	3087.2		2962.1	3780.4		3719.4	3780.4
2486.5	2706.8	3109.8	3060.1	3109.8	2336.4	3060.1	2336.4	2544.6	3063.2	2641.2	3260.1	2112.7	2949	3106.7	3078.2		5179.1	5171.8	118.9	126.6	2139.8	2629.1	132.8	110.1	4280.6	4104.8	3772.9	3139.5	4335.9	1402.1	3123.1	1404		2706.8	3063.2		2336.4	3078.2		5179.1	3772.9		4892.7	3772.9
1633.2	2002.1	2162.7	2144.1	2162.7	1844.4	2144.1	1844.4	2551.2	3242.8	2502.4	2944.4	3082.6	2947.9	3500.6	3077.6		2366.8	2424.6	97.3	126.9	3718.2	3646.3	132.8	112.4	2419.4	2695.3	2616.4	2332.2	3107.1	1396.4	1849.3	1402.6		2002.1	3242.8		1844.4	3077.6		2366.8	2616.4		3554.6	2616.4
2370.3	2944.1	3602.4	3568	3602.4	2597.6	3568	2597.6	2673.9	3261.8	3125.5	3105.9	3740.2	2942.5	3320.4	3075.8		3378.9	3530.6	104.4	127.1	3263.6	4060.2	133.2	131	3070.6	3245.8	2782.2	2700.4	2723.2	1391.4	3817.7	1402.1		2944.1	3261.8		2597.6	3075.8		3378.9	2782.2		3262.2	2782.2
676.6	1386.1	3514.8	3548.4	3514.8	2194.9	3548.4	2194.9	2619.1	3122.1	2837.5	2651.5	3061.8	2931.3	3007.8	3074.8		5272.7	5193.7	133	127.2	4046.6	3988.8	133.2	115.5	4360.2	4766.9	3559.7	3070.2	3641.4	1390	2564.1	1396.4		1386.1	3122.1		2194.9	3074.8		5272.7	3559.7		4879.9	3559.7
1589.1	2455.4	3657.1	3720.9	3657.1	2593.9	3720.9	2593.9	2545.4	2981.4	2508.4	3198.8	2612.6	2923.1	3302.4	3072.9		9257.2	9156.7	162.3	127.3	2287.5	2780.2	133.5	147.6	3646.4	4015.7	3136.7	2573.5	3822.5	1387.6	2408.9	1391.4		2455.4	2981.4		2593.9	3072.9		9257.2	3136.7		8553.9	3136.7
2230.8	2536.3	3283	3406.4	3283	2146.9	3406.4	2146.9	2558.2	3079.7	3476.7	3280.3	2359.5	2893.3	2931.9	3072.6		2157.5	2175.5	103.2	127.6	4988.2	4209.5	133.6	136.8	2215.9	2088.1	2394.2	1788.2	3971.6	1387.3	3255.2	1390		2536.3	3079.7		2146.9	3072.6		2157.5	2394.2		1973.2	2394.2
1641.8	2431.5	3366.7	3335.6	3366.7	2329.5	3335.6	2329.5	2657.6	3220.6	3336.7	3185.5	1496.9	2884.6	3108.2	3058.1		2390.1	2695.7	54.2	127.8	3632.2	3759.1	134.2	121.9	5518.9	11870.3	3369.7	4358.1	2544.2	1385.2	3162	1387.6		2431.5	3220.6		2329.5	3058.1		2390.1	3369.7		8605.8	3369.7
2048.6	2474.7	2871.4	2833.2	2871.4	2048.9	2833.2	2048.9	2854.4	3644.2	3797.1	3260.1	2090.5	2862	2886.2	3044.9		2517.6	2454.5	121.2	128.2	7498.7	7284.8	134.8	117.9	2756.9	2894.3	2640.1	2225.7	1612.8	1378.5	3429.5	1387.3		2474.7	3644.2		2048.9	3044.9		2517.6	2640.1		2377.1	2640.1
790.8	982.7	2663.4	2659.7	2663.4	1303.9	2659.7	1303.9	2937.1	3542	3212.1	3151.7	4818.2	2854.6	2270.5	3035.6		3368.2	3292.9	125.4	128.2	3197.5	3658.6	134.8	106.6	3794.3	3844.4	3681.7	3145.5	3648.2	1375.5	2065.2	1385.2		982.7	3542		1303.9	3035.6		3368.2	3681.7		3210	3681.7
2153.2	2674.9	3237.9	3203.9	3237.9	2397.4	3203.9	2397.4	2577.3	3071.7	2902	3006.7	2880.4	2854.6	3094.7	3035		2680.3	2743.6	89.1	128.3	3137.4	3598.6	135	114.8	2661.9	2954.1	2546.6	2206.7	2120.7	1372.7	1249.6	1378.5		2674.9	3071.7		2397.4	3035		2680.3	2546.6		3366.1	2546.6
1000.4	1292.4	2654.8	2706.4	2654.8	1458.9	2706.4	1458.9	2758.7	3384.8	2112.7	2763	3008.7	2846.2	2710.6	3033.8		3937.5	3990.6	98.7	128.7	2305.6	2726	136	125.2	2404.8	2725.9	2149.5	1944.4	3208.2	1367.5	1690.4	1375.5		1292.4	3384.8		1458.9	3033.8		3937.5	2149.5		3583.6	2149.5
1009.6	1506	2853.6	2639.5	2853.6	1742.5	2639.5	1742.5	2694.9	3458.1	3082.6	2977.5	2742.7	2836.9	3260.1	3031.6		4214	4139.7	97.1	129	3025.5	3668.7	136.2	99.8	4535.8	4651.3	4521.2	3830.2	1455.5	1365.4	1666.8	1372.7		1506	3458.1		1742.5	3031.6		4214	4521.2		3992	4521.2
865.4	1578.7	2193.8	1687.6	2193.8	1404.5	1687.6	1404.5	3757.4	4757.7	3740.2	3448.5	1504.6	2824.9	2944.4	3028.2		4239.3	4289.5	23.9	129.1	5143.7	4813	136.5	27.8	3609	3172.2	3103.1	2487.8	4722.3	1361.6	2543.4	1367.5		1578.7	4757.7		1404.5	3028.2		4239.3	3103.1		3540.7	3103.1
2475.6	2976.5	3699.8	3566.1	3699.8	2549	3566.1	2549	2663.9	3139.8	3061.8	2799.4	3013.8	2819.1	3105.9	3010		2805	2712.4	123.2	129.4	1273.2	1501.4	136.5	126.6	3587.8	3710.7	3712.8	3123.1	3062.5	1360.7	1274.8	1365.4		2976.5	3139.8		2549	3010		2805	3712.8		2858.6	3712.8
1287.7	2093.8	2649	2798.8	2649	1875.3	2798.8	1875.3	2352.9	2730.2	2612.6	3111.9	2919.1	2811.8	2651.5	3002.5		4283.7	8953.5	112.5	129.6	2008.4	2683.5	136.8	151.2	3535	3129.9	3258.7	1849.3	4129.8	1358.5	3768	1361.6		2093.8	2730.2		1875.3	3002.5		4283.7	3258.7		51897.7	3258.7
753.1	1463.2	3004.6	3236.6	3004.6	2090.4	3236.6	2090.4	2437.1	2911	2359.5	2940	3080.1	2804.1	3198.8	3001.2		4407.3	3949.9	117.1	130.9	5533.3	4144.3	137.8	130.2	4391.7	4832.6	4335.9	3817.7	4749.9	1351.6	2960.8	1360.7		1463.2	2911		2090.4	3001.2		4407.3	4335.9		3857.4	4335.9
2365.6	2774.6	3420.6	3253.5	3420.6	2446.2	3253.5	2446.2	2607.9	3235	1496.9	2194.1	2860.5	2795.7	3280.3	2997.5		8319	8613.7	165.8	130.9	2300	2616.9	138.2	122.3	4101.6	3819.6	3107.1	2564.1	1970.6	1349.1	3767.9	1358.5		2774.6	3235		2446.2	2997.5		8319	3107.1		7417.9	3107.1
2606.5	3158.5	3506.7	3478.7	3506.7	2499.8	3478.7	2499.8	2781.3	3343.5	2090.5	2663	2982.3	2795.4	3185.5	2997.5		3979.5	3867.9	24.8	131	1378.8	1535.6	138.3	98.3	3338.3	3748.2	2723.2	2408.9	2528.6	1347.7	4087.6	1351.6		3158.5	3343.5		2499.8	2997.5		3979.5	2723.2		3768	2723.2
2958	3308.1	4046.2	3780.6	4046.2	2728	3780.6	2728	2959.3	3549.8	4818.2	5667.8	2630.8	2784.4	3260.1	2988.1		3849	3739.9	167	131.3	3003.2	3497.9	138.3	137	3776.8	3918.3	3641.4	3255.2	9572	1340.8	1818.3	1349.1		3308.1	3549.8		2728	2988.1		3849	3641.4		3707.3	3641.4
2267.7	2702.3	3224	3275.2	3224	2219.8	3275.2	2219.8	2629.8	3192.1	2880.4	2947.9	1923.6	2777.6	3151.7	2980.6		2911.4	3365.9	92.7	132.8	3018.3	3140.1	139.2	129.5	3624.2	3942.8	3822.5	3162	2646.9	1337.9	2098.9	1347.7		2702.3	3192.1		2219.8	2980.6		2911.4	3822.5		5610.3	3822.5
2304.7	2762.9	3619.7	3720.9	3619.7	2626.2	3720.9	2626.2	2328	2760.4	3008.7	2844.7	2990.9	2767.6	3006.7	2977.7		3902.6	3752.8	88.9	132.8	4009.5	4502.4	139.6	145.6	3948.2	4081.7	3971.6	3429.5	2396	1335.9	3929.2	1340.8		2762.9	2760.4		2626.2	2977.7		3902.6	3971.6		4568.6	3971.6
683.1	1288.8	1891.4	1546.2	1891.4	1430.7	1546.2	1430.7	3421.4	4429.3	2742.7	2959.6	2758.2	2764.7	2763	2949		5387.7	5711	134.6	133.2	4154.2	4558.6	140.5	123	2822.6	3119.3	2544.2	2065.2	3079.2	1334.2	2221.6	1337.9		1288.8	4429.3		1430.7	2949		5387.7	2544.2		5260.3	2544.2
2307.6	2940	3561.7	3509.2	3561.7	2472.2	3509.2	2472.2	2513.2	3079.6	1504.6	2690.9	2960.8	2762.1	2977.5	2947.9		1640.9	1628.2	114.5	133.2	1467.4	1980.9	141.1	118.6	1468.2	1361.6	1612.8	1249.6	2409.9	1332.6	1264.4	1335.9		2940	3079.6		2472.2	2947.9		1640.9	1612.8		1592.3	1612.8
2547.5	3359	3648.1	3546.1	3648.1	2468.2	3546.1	2468.2	2751.4	3313.9	3013.8	2762	2716.1	2760.9	3448.5	2942.5		3896.4	4872.5	122.2	133.5	2056.4	2641	141.6	114.4	3289.9	3423	3648.2	1690.4	2338.6	1332.1	2608	1334.2		3359	3313.9		2468.2	2942.5		3896.4	3648.2		11873.2	3648.2
2219.6	2734.9	3339.6	3277.4	3339.6	2319.1	3277.4	2319.1	2483.4	3077.1	2919.1	2963.8	3020.2	2752.5	2799.4	2931.3		4696.5	5835.9	101.9	133.6	4061.5	5708.9	141.6	93.1	2288.2	2406.9	2120.7	1666.8	2787.4	1331.8	1970.4	1332.6		2734.9	3077.1		2319.1	2931.3		4696.5	2120.7		7096.5	2120.7
1149.2	1529.2	3097.4	3250.2	3097.4	2032.9	3250.2	2032.9	2348.8	2733.7	3080.1	2834.9	2923.7	2739.4	3111.9	2923.1		2638.6	2659.8	107.9	134.2	10615.2	9040.7	142.1	137.4	2926.7	2903.9	3208.2	2543.4	3258.8	1323.3	1915.8	1332.1		1529.2	2733.7		2032.9	2923.1		2638.6	3208.2		2670.7	3208.2
1602.5	2219.5	3471.1	3602.3	3471.1	2398.6	3602.3	2398.6	2405.4	2848.6	2860.5	2846.3	2896.4	2737.4	2940	2893.3		1645.7	1608.9	90.9	134.8	835.7	941	142.2	131.9	1521.8	1588.8	1455.5	1274.8	2575.2	1317.4	2547.2	1331.8		2219.5	2848.6		2398.6	2893.3		1645.7	1455.5		1466.4	1455.5
754.3	1012.2	2415.2	2481.2	2415.2	1231.4	2481.2	1231.4	2567.6	3107.5	2982.3	3139.2	2530.6	2726.6	2194.1	2884.6		3307.3	3332.2	94.3	134.8	4087	4152.9	142.7	87.7	4510.1	4096.9	4722.3	3768	3129.8	1308.6	1517.3	1323.3		1012.2	3107.5		1231.4	2884.6		3307.3	4722.3		4381.4	4722.3
1407.7	1810.1	3350.7	3313.9	3350.7	2024.2	3313.9	2024.2	2652.7	3173.1	2630.8	2819.2	2196.9	2718.1	2663	2862		3282.4	3267.6	110.5	135	1450.2	1904.5	143	120.7	3395.1	3741.4	3062.5	2960.8	1500.8	1308.4	2179.5	1317.4		1810.1	3173.1		2024.2	2862		3282.4	3062.5		2954.1	3062.5
8761.2	5763.2	7690.6	8253.7	7690.6	4479.1	8253.7	4479.1	3381.2	3968.6	1923.6	2884.7	2227.1	2689.8	5667.8	2854.6		4828.5	4692.1	104.9	136	1507.7	1953.7	143.1	38.2	4519	4921.8	4129.8	3767.9	2875	1305.6	2556.7	1308.6		5763.2	3968.6		4479.1	2854.6		4828.5	4129.8		4444.3	4129.8
1748.8	2006.7	2583.4	2603.2	2583.4	1954	2603.2	1954	2458	2964.1	2990.9	2808.8	2073.5	2681.5	2947.9	2854.6		4764.5	4718.3	160.8	136.2	12031.4	8583.5	143.5	18.2	4966.1	4850.6	4749.9	4087.6	2137.6	1304.3	1205.3	1308.4		2006.7	2964.1		1954	2854.6		4764.5	4749.9		4407.1	4749.9
2247.2	2593.8	3057.7	2992.4	3057.7	2207.9	2992.4	2207.9	2368.4	2906	2758.2	2662.7	3155	2680.1	2844.7	2846.2		1926.8	1801.5	19.7	136.5	1220.8	1640	143.6	133.2	1862.7	2142	1970.6	1818.3	1829.4	1304.3	2493	1305.6		2593.8	2906		2207.9	2846.2		1926.8	1970.6		2128	1970.6
1536.4	2023.1	2620.9	2729.3	2620.9	2015.8	2729.3	2015.8	2408.7	2901.5	2960.8	2839.1	2826.3	2671.3	2959.6	2836.9		2958.9	2723.3	98.5	136.5	2684.2	3152	143.8	73.4	2649.2	2816.8	2528.6	2098.9	3555.3	1299.4	1991.1	1304.3		2023.1	2901.5		2015.8	2836.9		2958.9	2528.6		10430.6	2528.6
613.4	945.2	2264.1	2362.3	2264.1	1288.9	2362.3	1288.9	2560.2	3198.7	2716.1	2842.2	2074	2671	2690.9	2824.9		8197.3	10080.7	154.3	136.8	2976.3	3298.3	143.9	157.4	7798.4	7085.8	9572	3929.2	6358.2	1296.2	1521.9	1304.3		945.2	3198.7		1288.9	2824.9		8197.3	9572		22625.5	9572
2166.2	2548.8	3098.2	3206.8	3098.2	2183.4	3206.8	2183.4	2285.8	2999.3	3020.2	3010.6	2945.3	2669.9	2762	2819.1		11383.6	11622.7	121.7	137.8	2257.3	1836.7	143.9	92.9	3035.7	3291.7	2646.9	2221.6	2043.7	1296.1	3034.1	1299.4		2548.8	2999.3		2183.4	2819.1		11383.6	2646.9		10349.3	2646.9
1502.2	1964.5	3007.7	3004.1	3007.7	1990.8	3004.1	1990.8	2349.1	2894	2923.7	2932.2	1867.6	2667.1	2963.8	2811.8		1371	1549.5	111.7	138.2	2449.3	2722.5	143.9	114.1	1767.2	1751.3	2396	1264.4	3833.6	1292.2	5428.2	1296.2		1964.5	2894		1990.8	2811.8		1371	2396		12288.9	2396
1861.4	2209.1	2678.7	2687.7	2678.7	1885.3	2687.7	1885.3	2435.9	2947.5	2896.4	2887.6	2848	2659.6	2834.9	2804.1		4477.1	4449.3	93.5	138.3	9599.6	7918	144.4	128.6	3656.6	3918.6	3079.2	2608	1358.2	1292	1803.1	1296.1		2209.1	2947.5		1885.3	2804.1		4477.1	3079.2		4111.7	3079.2
1785.1	2313.8	2752.5	2780.2	2752.5	2120.7	2780.2	2120.7	2336.8	2758.1	2530.6	2906.1	2737.9	2648.6	2846.3	2795.7		1848.3	1843.4	112.2	138.3	11088.9	7502.5	145.3	121.1	2343.5	2478.8	2409.9	1970.4	4603	1283.2	3322.5	1292.2		2313.8	2758.1		2120.7	2795.7		1848.3	2409.9		2039.8	2409.9
1211.3	1804.6	3104.4	3068.6	3104.4	2079.2	3068.6	2079.2	2621.2	3185.7	2196.9	2329.6	2997.3	2641.3	3139.2	2795.4		2114.7	2012.5	133.5	139.2	2661.9	3007.9	145.8	113.5	2221.4	2337.6	2338.6	1915.8	2791.9	1276.8	1169.5	1292		1804.6	3185.7		2079.2	2795.4		2114.7	2338.6		2136.4	2338.6
1150.2	1499.2	2592.8	2581.6	2592.8	1669.9	2581.6	1669.9	2349.2	2961.3	2227.1	2722.8	2572	2622.2	2819.2	2784.4		11068.2	12590.9	133.9	139.6	3758.1	4601.2	148.6	98.7	3309.6	3560.6	2787.4	2547.2	1129.8	1276.6	3778.6	1283.2		1499.2	2961.3		1669.9	2784.4		11068.2	2787.4		11280.7	2787.4
948.6	1446.3	2700.8	2774.8	2700.8	1698.5	2774.8	1698.5	2372	2865.2	2073.5	2634.9	934.4	2618.1	2884.7	2777.6		2338.7	2834.6	155.7	140.5	3390.7	3130.4	148.7	121.9	2561.7	2709.7	3258.8	1517.3	2072.3	1249.5	2285.3	1276.8		1446.3	2865.2		1698.5	2777.6		2338.7	3258.8		7276.4	3258.8
2181.7	2730	3162.3	3150	3162.3	2372.3	3150	2372.3	2387.8	2844.8	3155	3139	2668.4	2614.3	2808.8	2767.6		3253.3	3199.9	110.8	141.1	2958.5	3671.1	148.8	122.9	2694.7	3005.9	2575.2	2179.5	1265.6	1247.7	880.3	1276.6		2730	2844.8		2372.3	2767.6		3253.3	2575.2		3408.1	2575.2
1097.3	1826.9	2459.2	2295.2	2459.2	1733.4	2295.2	1733.4	2512.5	3079.5	2826.3	2722.3	2587.6	2606.5	2662.7	2764.7		3687.2	3590.9	90.2	141.6	989.7	994.2	149	130	3389.7	3184.2	3129.8	2556.7	3716.2	1247.2	1786.8	1249.5		1826.9	3079.5		1733.4	2764.7		3687.2	3129.8		3522.3	3129.8
2080.4	2467.4	3135.1	3007.3	3135.1	2271.6	3007.3	2271.6	2325	2827.3	2074	2720.1	2148.5	2598.9	2839.1	2762.1		2156.3	2148	77.4	141.6	3504.3	3929.4	150.4	140.4	1497.1	1598.7	1500.8	1205.3	2791.9	1241.3	1012.2	1247.7		2467.4	2827.3		2271.6	2762.1		2156.3	1500.8		2175.3	1500.8
1510.1	1821.7	2621.3	2576.7	2621.3	1849.4	2576.7	1849.4	2323.7	2932	2945.3	2876.8	1929	2598.1	2842.2	2760.9		2651.6	2761.1	122.4	142.1	2745.6	3089.5	150.9	97.3	2860.3	3007.6	2875	2493	3331.5	1236.3	3160.3	1247.2		1821.7	2932		1849.4	2760.9		2651.6	2875		2795.5	2875
1921.7	2371.4	3023.7	2900.8	3023.7	2078.5	2900.8	2078.5	2462.4	3047.2	1867.6	2293.5	1696.9	2597.3	3010.6	2752.5		9241.1	9901.4	148.5	142.2	1022.1	1172.1	152.1	147.3	2630.5	2780.8	2137.6	1991.1	4275.5	1232.8	2418.8	1241.3		2371.4	3047.2		2078.5	2752.5		9241.1	2137.6		8817.5	2137.6
2427.3	2847.6	3332.5	3234.3	3332.5	2398.4	3234.3	2398.4	2396.7	2944.4	2848	2619	2401	2595.4	2932.2	2739.4		9277.7	10972.8	73	142.7	1885.6	1850.8	152.7	161.1	1908.3	1985.2	1829.4	1521.9	2902.9	1232.6	2722.5	1236.3		2847.6	2944.4		2398.4	2739.4		9277.7	1829.4		9356.3	1829.4
2146.4	2590.6	2945.8	2881	2945.8	2068.5	2881	2068.5	2425.8	2928.2	2737.9	2618.8	2568.6	2586.6	2887.6	2737.4		2912.6	3013.5	134	143	2912	2265.1	153.1	36.9	3443	3635.4	3555.3	3034.1	5705.2	1230	3951.1	1232.8		2590.6	2928.2		2068.5	2737.4		2912.6	3555.3		2953.3	3555.3
1137.3	2066.5	2932.9	2236.4	2932.9	1657.6	2236.4	1657.6	3460.9	4409.7	2997.3	2773.2	2714.7	2586.2	2906.1	2726.6		4674.5	4618.4	22.2	143.1	3306.5	3692.3	154	141.3	6389.9	5983.6	6358.2	5428.2	3559.1	1224.3	2480.7	1232.6		2066.5	4409.7		1657.6	2726.6		4674.5	6358.2		4719.7	6358.2
1643.2	1870.2	2696	2739.5	2696	1705.7	2739.5	1705.7	2328.7	2850.2	2572	2802.3	2363.8	2578.1	2329.6	2718.1		3533.7	3600.2	14.1	143.5	2882.4	3418.7	154	6.7	2203.1	2457.7	2043.7	1803.1	5335.1	1223.5	4823.1	1230		1870.2	2850.2		1705.7	2718.1		3533.7	2043.7		4321.2	2043.7
1286.3	1634.8	2773.6	2779.5	2773.6	1688	2779.5	1688	2136.8	2535.5	934.4	1784.2	2636.6	2565.5	2722.8	2689.8		3964.1	3760.6	104.4	143.6	9568.3	7727.6	154.6	134.8	4059.4	4236.7	3833.6	3322.5	1971.6	1218.9	3043.6	1224.3		1634.8	2535.5		1688	2689.8		3964.1	3833.6		3641.7	3833.6
926.5	1473.4	2907	2664.4	2907	1715.7	2664.4	1715.7	2572.5	3073.9	2668.4	2313.9	2874.7	2562.2	2634.9	2681.5		1139.9	1178.5	28.1	143.8	3408.6	3971.5	155	33.1	1319.5	1499.4	1358.2	1169.5	4960.5	1217.4	4876.5	1223.5		1473.4	3073.9		1715.7	2681.5		1139.9	1358.2		1486.9	1358.2
1290.5	2180.3	3166.9	3010.2	3166.9	2384.2	3010.2	2384.2	2210.8	2732.2	2587.6	2649.8	2624.3	2555.8	3139	2680.1		3930.8	4016.7	115.7	143.9	2208.1	2671	155.3	119.1	4282.2	4350.1	4603	3778.6	3641.7	1213.5	1705.7	1218.9		2180.3	2732.2		2384.2	2680.1		3930.8	4603		4066.6	4603
2205.5	2647.6	3235.3	3234.8	3235.3	2216.8	3234.8	2216.8	2297.6	2745.6	2148.5	2705.1	2586.4	2540.2	2722.3	2671.3		3392.3	3251.3	83.6	143.9	5288.2	6016.2	155.5	153.9	2908	3240.5	2791.9	2285.3	3249.7	1213.1	4246.7	1217.4		2647.6	2745.6		2216.8	2671.3		3392.3	2791.9		3241.1	2791.9
545.9	729.9	1225.1	1152.4	1225.1	904.1	1152.4	904.1	2130.9	2730.6	1929	2432.3	2493.1	2537	2720.1	2671		1126.8	1247.6	121.4	143.9	2960	3740.9	155.5	168.5	994.1	1124.2	1129.8	880.3	1273.2	1211.8	2848.9	1213.5		729.9	2730.6		904.1	2671		1126.8	1129.8		1945.9	1129.8
1668	2108.2	2695	2578.2	2695	1846.9	2578.2	1846.9	2292.4	2745	1696.9	2359.4	2415.4	2534.7	2876.8	2669.9		2148.4	1966	93.1	144.4	4402.5	6052	155.7	145.6	2118.1	2204.9	2072.3	1786.8	2331.5	1210.5	1635.3	1213.1		2108.2	2745		1846.9	2669.9		2148.4	2072.3		1824	2072.3
857.2	1189.4	1947.8	2031.5	1947.8	1404.8	2031.5	1404.8	2242.6	2823.7	2401	2587.6	2737	2518.1	2293.5	2667.1		2895	3096.8	147.7	145.3	2552.1	2865.1	155.7	146.9	1119	1252.6	1265.6	1012.2	1850.4	1210.4	1048.5	1211.8		1189.4	2823.7		1404.8	2667.1		2895	1265.6		2983	1265.6
1933.5	2519.1	2862.2	2848.5	2862.2	2220.1	2848.5	2220.1	2247.3	2724.7	2568.6	2548	2195.2	2515.2	2619	2659.6		4142.4	3875	112	145.8	4143.7	5130.8	155.9	40.9	3832.6	4024.5	3716.2	3160.3	1589.9	1206.2	2166.8	1210.5		2519.1	2724.7		2220.1	2659.6		4142.4	3716.2		3757.1	3716.2
1575.5	1908	2662.6	2575.9	2662.6	1845.4	2575.9	1845.4	2321.5	2839.7	2714.7	2437.1	2165.5	2513.8	2618.8	2648.6		3735	3639.3	112.4	148.6	3965.1	4380.9	156.2	155.4	3136.7	3364.1	2791.9	2418.8	1249.7	1203.1	1543.5	1210.4		1908	2839.7		1845.4	2648.6		3735	2791.9		3324	2791.9
2341.1	2916.9	3428.1	3321	3428.1	2379.5	3321	2379.5	2368.1	2886.4	2363.8	2665.4	2810.2	2510.9	2773.2	2641.3		9530.5	10699.5	119	148.7	4565.8	5026.6	157.6	155.6	3243.3	3369.4	3331.5	2722.5	3150.7	1202.4	1254.9	1206.2		2916.9	2886.4		2379.5	2641.3		9530.5	3331.5		9000.1	3331.5
1546.2	2106.2	2654.8	2646.9	2654.8	2004.3	2646.9	2004.3	2202.4	2602.7	2636.6	2573.4	1711.4	2504.9	2802.3	2622.2		4060.2	3800.8	142.1	148.8	1159.9	1306.1	158.5	160.1	4302.9	4322.5	4275.5	3951.1	6147.3	1201.7	1085.6	1203.1		2106.2	2602.7		2004.3	2622.2		4060.2	4275.5		5247.4	4275.5
301.8	498.9	2015.9	1872.1	2015.9	821.6	1872.1	821.6	2902	3573.9	2874.7	2607	2749	2488.4	1784.2	2618.1		2841	2820	130.7	149	1775.3	2341.8	159.2	151.7	3076.4	3228	2902.9	2480.7	3176.6	1198.7	2838.4	1202.4		498.9	3573.9		821.6	2618.1		2841	2902.9		3052.6	2902.9
1621.7	2099	1983.6	1920.7	1983.6	1639.1	1920.7	1639.1	1974.6	2557.8	2624.3	2825.5	2700.5	2481.8	2313.9	2614.3		6574	6508.5	133.7	150.4	2425.7	2387.4	159.5	45.6	6146.9	6110.2	5705.2	4823.1	2621.3	1194.6	4755.6	1201.7		2099	2557.8		1639.1	2614.3		6574	5705.2		5944.9	5705.2
1393.1	1813.5	2479.1	2429	2479.1	1744.8	2429	1744.8	2342.1	2776.5	2586.4	2473.2	2380.2	2448.4	2649.8	2606.5		3913.4	3813.5	82.6	150.9	1054.9	1222.5	160.6	51.1	3718	3640.5	3559.1	3043.6	2123.5	1194.2	2569.7	1198.7		1813.5	2776.5		1744.8	2606.5		3913.4	3559.1		3761.5	3559.1
1042.2	1795.8	2459.8	2006.8	2459.8	1575.9	2006.8	1575.9	3365.5	4195.7	2493.1	2392.5	2803.6	2448	2705.1	2598.9		5706.3	5603.5	135	152.1	1061.6	1007.2	160.9	143.4	5686.8	5645.4	5335.1	4876.5	1178.5	1192.7	2223.6	1194.6		1795.8	4195.7		1575.9	2598.9		5706.3	5335.1		6193	5335.1
1036.5	1399.6	2668.7	2730.8	2668.7	1657.1	2730.8	1657.1	2276	2822	2415.4	2413.1	2474.9	2439.7	2432.3	2598.1		3078.3	2928.7	161.1	152.7	3902.7	4156.5	161	37.7	2161.2	2312.7	1971.6	1705.7	2058.4	1189.2	1736	1194.2		1399.6	2822		1657.1	2598.1		3078.3	1971.6		2717.4	1971.6
258.7	1739.6	2773.9	993.5	2773.9	1928	993.5	1928	6670.6	8741	2737	2695.7	2281.7	2437	2359.4	2597.3		5459.8	5345.3	30.5	153.1	4276.1	5251.1	161.4	184.7	5376	5528.3	4960.5	4246.7	3353.5	1186.2	1031.8	1192.7		1739.6	8741		1928	2597.3		5459.8	4960.5		4972.6	4960.5
1244.4	1583.6	2191.5	2207.8	2191.5	1600.4	2207.8	1600.4	2226.3	2733.3	2195.2	2607.4	2732.1	2416	2587.6	2595.4		4744.2	4637.9	118.8	154	2726.8	3445.2	162.6	150	3772.9	3748	3641.7	2848.9	4148.5	1183.7	1674	1189.2		1583.6	2733.3		1600.4	2595.4		4744.2	3641.7		4364.8	3641.7
1019.5	1332	1938.6	1960.2	1938.6	1437	1960.2	1437	2247.3	2637.1	2165.5	2590.5	2104	2407.6	2548	2586.6		6729.3	8455.6	7.1	154	3223.9	3485.3	163.3	163.6	3496.6	3714.5	3249.7	1635.3	1797.4	1183.6	2980	1186.2		1332	2637.1		1437	2586.6		6729.3	3249.7		17769.1	3249.7
1785.3	1957.2	2423	2530.2	2423	1746.4	2530.2	1746.4	2105.7	2395.5	2810.2	2534.6	2232.9	2406.3	2437.1	2586.2		1463.2	1432.6	181.4	154.6	3150.8	2955.5	164	186.7	1220.1	1424.5	1273.2	1048.5	2865.6	1181.8	3862.4	1183.7		1957.2	2395.5		1746.4	2586.2		1463.2	1273.2		1840.8	1273.2
1553.2	1960.6	2642.7	2815.5	2642.7	1875.7	2815.5	1875.7	2082.3	2438	1711.4	2669	1517.4	2403.7	2665.4	2578.1		2308.9	2232.7	18.5	155	3812.5	3573.9	164.3	159.6	2479.8	2698.3	2331.5	2166.8	2457.4	1175.1	1554.2	1183.6		1960.6	2438		1875.7	2578.1		2308.9	2331.5		2480.8	2331.5
1893	2338.3	2869.3	2796	2869.3	2020	2796	2020	2277.8	2772	2749	2729.8	1008.5	2398.5	2573.4	2565.5		2622.8	2587.4	108.2	155.3	3200.9	2980.3	164.6	166.7	1664.8	1807.1	1850.4	1543.5	2343.6	1171.3	2692.1	1181.8		2338.3	2772		2020	2565.5		2622.8	1850.4		2539.2	1850.4
1735.4	2081.8	2834.3	2673.1	2834.3	1989	2673.1	1989	2286.3	2818.4	2700.5	2366.5	2256.4	2393.7	2607	2562.2		1358.4	1391.1	175.9	155.5	2570	3053.1	164.7	161.3	1436.1	1541.7	1589.9	1254.9	2140.8	1168.6	2308.7	1175.1		2081.8	2818.4		1989	2562.2		1358.4	1589.9		2765.9	1589.9
1251.6	1657.5	1893	1979	1893	1556.8	1979	1556.8	2159.6	2649.6	2380.2	2016.5	2148.2	2380.5	2825.5	2555.8		1070.6	1040.4	159.5	155.5	3124.5	3982.7	165.3	153.5	1127.7	1270.8	1249.7	1085.6	3034.8	1167.7	2014.5	1171.3		1657.5	2649.6		1556.8	2555.8		1070.6	1249.7		899.2	1249.7
1488.7	1915.2	2631.5	2659.1	2631.5	1766.8	2659.1	1766.8	2179.9	2652.5	2803.6	2793.8	2909.7	2375.1	2473.2	2540.2		4102.7	4766.1	197.9	155.7	1730.5	1915.8	165.4	68.2	3682.6	4161.4	3150.7	2838.4	2942.7	1163.4	1794	1168.6		1915.2	2652.5		1766.8	2540.2		4102.7	3150.7		6384.8	3150.7
1716.2	2166.1	2256.5	2221.5	2256.5	1877.8	2221.5	1877.8	2104.4	2594.9	2474.9	2593.4	1060.9	2350.3	2392.5	2537		5469.8	5586.8	160.1	155.7	2272.6	2931.1	166.3	172.9	6022.4	5040.8	6147.3	4755.6	2330.1	1162.6	2749.5	1167.7		2166.1	2594.9		1877.8	2537		5469.8	6147.3		5039	6147.3
1699.6	2091.9	2813.9	2748.2	2813.9	1847.7	2748.2	1847.7	2302.7	2757.1	2281.7	2677.4	754.3	2346	2413.1	2534.7		3577.6	3468.6	37.9	155.9	2175.9	2306	167.5	128.8	3139.2	3290.5	3176.6	2569.7	2362	1160.8	2747.5	1163.4		2091.9	2757.1		1847.7	2534.7		3577.6	3176.6		3395.1	3176.6
1212	1586.7	1919	1836.9	1919	1492.2	1836.9	1492.2	2157.8	2611.4	2732.1	2662.2	2526.9	2343.5	2695.7	2518.1		3744.8	3890.4	137	156.2	2761.4	3042.9	168.4	172.9	2974.7	3076	2621.3	2223.6	1607.6	1156	2059	1162.6		1586.7	2611.4		1492.2	2518.1		3744.8	2621.3		4708.4	2621.3
1254.8	1758.8	2657.2	2574.2	2657.2	1653.5	2574.2	1653.5	2207.5	2641.1	2104	2127.5	2498.2	2331.3	2607.4	2515.2		3102.5	2984.8	137.3	157.6	2631.5	2762.8	168.5	133.8	2389.5	2609.7	2123.5	1736	1046.9	1153.8	2118.5	1160.8		1758.8	2641.1		1653.5	2515.2		3102.5	2123.5		2864.4	2123.5
930.8	1360.1	2064.3	1971.3	2064.3	1512.6	1971.3	1512.6	2264.4	2795	2232.9	2466.8	2135.2	2319.8	2590.5	2513.8		3856	4124.2	111.9	158.5	7167.1	7789.4	170	79.1	1277.7	1460.7	1178.5	1031.8	2447	1148.5	1345.1	1156		1360.1	2795		1512.6	2513.8		3856	1178.5		3675.3	1178.5
1961.3	2677.8	2858.2	2651.4	2858.2	2008.1	2651.4	2008.1	2162.1	2696.3	1517.4	2270.3	2343.1	2318.9	2534.6	2510.9		3211.2	3355.5	125.9	159.2	2392.7	2920.1	170.1	155.7	1948.2	2065.9	2058.4	1674	3094.1	1145.6	847.1	1153.8		2677.8	2696.3		2008.1	2510.9		3211.2	2058.4		3218	2058.4
532.9	1063	2323	2310.9	2323	1452.9	2310.9	1452.9	2135.6	2606	1008.5	1729.7	1822.2	2305.4	2669	2504.9		3161.6	3189.4	34.6	159.5	1935.9	2380.7	170.2	164.3	3184.6	3391.4	3353.5	2980	1776.4	1145.5	1954	1148.5		1063	2606		1452.9	2504.9		3161.6	3353.5		3675.6	3353.5
2111.9	2596.6	3103.1	3159.5	3103.1	2207.1	3159.5	2207.1	2122	2610.9	2256.4	2549	737.3	2305.3	2729.8	2488.4		4134.5	3678.8	43.4	160.6	3613.2	3975	171.4	109.9	4576.5	4638	4148.5	3862.4	2214.5	1144.4	2779.4	1145.6		2596.6	2610.9		2207.1	2488.4		4134.5	4148.5		3743.2	4148.5
2009.7	2291.6	2762.1	2659.7	2762.1	1864.6	2659.7	1864.6	2045.1	2509	2148.2	2119.2	2224.9	2295.8	2366.5	2481.8		2141.5	1993.6	168.6	160.9	2178.4	2163.5	171.5	186.6	1971	2137.4	1797.4	1554.2	2239.3	1138.9	1656.1	1145.5		2291.6	2509		1864.6	2481.8		2141.5	1797.4		1856.5	1797.4
1869.6	2429.6	2865.6	2851.5	2865.6	2041.3	2851.5	2041.3	1975.5	2496.2	2909.7	2627.4	2163.7	2290	2016.5	2448.4		3420.5	2897.9	32.5	161	4647.5	3567.7	171.7	164.8	3040.4	3128.7	2865.6	2692.1	3067.7	1138.3	1774.4	1144.4		2429.6	2496.2		2041.3	2448.4		3420.5	2865.6		3401.1	2865.6
1833.9	2446.1	2661.4	2742.2	2661.4	1959	2742.2	1959	2188.4	2665.6	1060.9	2148.7	2012.5	2284.3	2793.8	2448		2447.1	2339.7	208.6	161.4	2373.8	2582.6	172.1	164.3	2376.7	2673.3	2457.4	2308.7	4537.3	1136.4	1979.6	1138.9		2446.1	2665.6		1959	2448		2447.1	2457.4		3610	2457.4
1326.6	1715.4	2037.4	2034.6	2037.4	1421.5	2034.6	1421.5	2204.1	2788.6	754.3	1655.1	1654.9	2276.8	2593.4	2439.7		3355.1	3240.8	102.8	162.6	2498.9	2762.9	172.2	185.6	2675.9	2810.9	2343.6	2014.5	1616.5	1132.7	2575.8	1138.3		1715.4	2788.6		1421.5	2439.7		3355.1	2343.6		2914.5	2343.6
785.8	1241.5	2392	2350.6	2392	1558	2350.6	1558	2129.4	2736.4	2526.9	2466.8	665.9	2276.6	2677.4	2437		3066.7	2797.6	125.8	163.3	1502.3	1621.8	172.2	26.7	2122	2288.3	2140.8	1794	2579.2	1128	3885.7	1136.4		1241.5	2736.4		1558	2437		3066.7	2140.8		3078.7	2140.8
1885.8	2256.8	2652.1	2604.5	2652.1	1806.5	2604.5	1806.5	2090.9	2605.5	2498.2	2441.9	2597	2276.3	2662.2	2416		8426.5	7980.9	149	164	11781.7	7535.8	172.4	94.7	4506.9	4568.5	3034.8	2749.5	3682.1	1114.1	1381.5	1132.7		2256.8	2605.5		1806.5	2416		8426.5	3034.8		7637.6	3034.8
983	2080.5	2986.7	2634.4	2986.7	1901.3	2634.4	1901.3	2921.4	3298	2135.2	2330.8	2351	2267.4	2127.5	2407.6		2970.9	2845.7	144.8	164.3	1862.3	1931.8	172.4	174.9	3122.4	3245.4	2942.7	2747.5	2276.5	1111	2202.4	1128		2080.5	3298		1901.3	2407.6		2970.9	2942.7		3861.8	2942.7
1009.8	2428.6	3330.5	1897.9	3330.5	2492.2	1897.9	2492.2	4471.9	5633.7	2343.1	2131.5	1846.2	2262.5	2466.8	2406.3		2469	2397.8	162.8	164.6	4387.1	4581.4	173	177.6	2340.5	2424.4	2330.1	2059	2465.9	1107.3	3132.2	1114.1		2428.6	5633.7		2492.2	2406.3		2469	2330.1		2869.7	2330.1
819.7	1155	2420.4	2376.6	2420.4	1411.6	2376.6	1411.6	2042	2352.6	1822.2	2240.6	2680.2	2259.6	2270.3	2403.7		3895.2	4017	190.2	164.7	4123	4784.6	173.5	72.6	2554	2717	2362	2118.5	2175	1107.3	1944.3	1111		1155	2352.6		1411.6	2403.7		3895.2	2362		4123.8	2362
395.4	697.2	1671.9	1419.6	1671.9	787.7	1419.6	787.7	2424.1	3156.7	737.3	2259.9	1495.9	2257.4	1729.7	2398.5		2457	2465.6	193.9	165.3	1516.2	1677.9	173.5	165.6	1561.2	1712.4	1607.6	1345.1	2339.7	1102.1	2159.8	1107.3		697.2	3156.7		787.7	2398.5		2457	1607.6		2215.3	1607.6
576.7	838.7	1598.4	1387	1598.4	978.8	1387	978.8	1900.5	2380.2	2224.9	2434.8	2407	2251.4	2549	2393.7		3734.1	4885.2	59.5	165.4	3046.2	3537.2	174.5	173.3	1154.6	1214.9	1046.9	847.1	1289.1	1101.3	1728.8	1107.3		838.7	2380.2		978.8	2393.7		3734.1	1046.9		4450.5	1046.9
1545.7	2042.5	2672	2641.4	2672	1915	2641.4	1915	1998.6	2471.3	2163.7	2231.8	2191.9	2247	2119.2	2380.5		2846.4	2846.5	140	166.3	4945.2	5102.6	174.6	150.4	2615.8	2672.1	2447	1954	2648.6	1099.5	2005.2	1102.1		2042.5	2471.3		1915	2380.5		2846.4	2447		2703.2	2447
1956.6	2497.1	2760.1	2648.8	2760.1	1863.6	2648.8	1863.6	2092	2530.8	2012.5	2131.2	2334.2	2246.8	2627.4	2375.1		2638.7	2706.1	99.5	167.5	1949.5	2377.4	175.7	178.3	2920.1	3153.2	3094.1	2779.4	2263	1098.6	963.1	1101.3		2497.1	2530.8		1863.6	2375.1		2638.7	3094.1		4160.7	3094.1
422.3	773.5	2515.6	2009.3	2515.6	1049.1	2009.3	1049.1	3058.9	3790.9	1654.9	2003.4	896	2242.9	2148.7	2350.3		1741	1636.3	173	168.4	2815.6	2928.8	176.1	44.8	1852.2	2082.6	1776.4	1656.1	1513.9	1096.5	2269.5	1099.5		773.5	3790.9		1049.1	2350.3		1741	1776.4		1574.4	1776.4
321.1	534.4	2385.4	2335.1	2385.4	1081	2335.1	1081	2062.2	2491	665.9	2165.5	2541.9	2233.4	1655.1	2346		9672.1	11219.5	127.2	168.5	3333.2	2861	176.3	145.1	2248.2	2221.8	2214.5	1774.4	3442.2	1094.1	2005.4	1098.6		534.4	2491		1081	2346		9672.1	2214.5		9591.2	2214.5
1562.2	1989.9	2822.3	2762.3	2822.3	1902.9	2762.3	1902.9	1951.3	2380.4	2597	2314.2	2084	2206.5	2466.8	2343.5		1967.9	2068.4	92.4	170	6009.6	4514.9	176.6	174.3	2180.1	2281.5	2239.3	1979.6	2415	1092.2	1347.1	1096.5		1989.9	2380.4		1902.9	2343.5		1967.9	2239.3		2055.9	2239.3
1701.6	2226.3	2912	2974.3	2912	2031	2974.3	2031	1890.1	2329.4	2351	2314.4	2179.8	2204.3	2441.9	2331.3		4972.5	5017.4	151.5	170.1	1093	1029.6	176.9	141.9	3869.4	3782.8	3067.7	2575.8	3224.8	1091.7	2709.2	1094.1		2226.3	2329.4		2031	2331.3		4972.5	3067.7		4496	3067.7
864.8	1236.8	2135.6	2195.1	2135.6	1386.4	2195.1	1386.4	1939.2	2307.8	1846.2	2137.4	2242.6	2198.9	2330.8	2319.8		4887.1	4883.3	181.6	170.2	1976.1	2219.2	177.2	203.9	4740	4499.9	4537.3	3885.7	2938.5	1089.8	2219	1092.2		1236.8	2307.8		1386.4	2319.8		4887.1	4537.3		5319.5	4537.3
1376.9	1711.2	2235.9	2215.6	2235.9	1683.6	2215.6	1683.6	1943.6	2443.7	2680.2	2608.6	1546.9	2181.3	2131.5	2318.9		1907.3	1803.8	112.9	171.4	2648.4	2571.7	177.2	180.8	1760.8	1967.3	1616.5	1381.5	1526.6	1089.7	2930.9	1091.7		1711.2	2443.7		1683.6	2318.9		1907.3	1616.5		1850.3	1616.5
1133.2	1631.1	2847.8	2891.7	2847.8	1787.7	2891.7	1787.7	1989.3	2316.6	1495.9	1834.6	2365.4	2179.7	2240.6	2305.4		3567.5	3316	199.5	171.5	1432.7	1561	177.3	147	2683.3	2858	2579.2	2202.4	2278.8	1087.1	2504.8	1089.8		1631.1	2316.6		1787.7	2305.4		3567.5	2579.2		3487.6	2579.2
237.1	361	2062.2	2052.5	2062.2	779.4	2052.5	779.4	2086.5	2424.9	2407	2458.3	2232.8	2176.6	2259.9	2305.3		5590.5	5417.8	117.4	171.7	2588.5	3135	177.5	158.7	4122.9	4211	3682.1	3132.2	2883.3	1083.1	1177.4	1089.7		361	2424.9		779.4	2305.3		5590.5	3682.1		5106.1	3682.1
1047.2	1661.9	2709.6	2744.7	2709.6	1853	2744.7	1853	1961.6	2320.2	2191.9	2343.4	3961.8	2171.4	2434.8	2295.8		2477.7	2409.6	143.6	172.1	4734.7	4979.4	177.6	172	2407.1	2462	2276.5	1944.3	1389.1	1076.1	1887.7	1087.1		1661.9	2320.2		1853	2295.8		2477.7	2276.5		2496.3	2276.5
1059	1634.9	2163	2219.8	2163	1508.6	2219.8	1508.6	2506.2	3035.2	2334.2	2358	2274.4	2169.8	2231.8	2290		3111.2	3089.7	149.6	172.2	2435.1	3063.9	178	158.4	2544.1	2827.5	2465.9	2159.8	1722.1	1074.5	2348.9	1083.1		1634.9	3035.2		1508.6	2290		3111.2	2465.9		2733.6	2465.9
1305.8	1797.3	2612.4	2676.3	2612.4	1604	2676.3	1604	1979.6	2365.5	896	2147.5	2241.5	2147	2131.2	2284.3		3117.1	3437.8	20.4	172.2	2288.5	2519.2	178.2	165.6	2175.7	2180.3	2175	1728.8	4400	1071.5	1216.4	1076.1		1797.3	2365.5		1604	2284.3		3117.1	2175		3094.5	2175
794.9	1174.3	2300.8	2388.9	2300.8	1589.7	2388.9	1589.7	1773.7	2117.1	2541.9	2351.2	1963.4	2133.5	2003.4	2276.8		5347.1	6690.6	85	172.4	1002.4	1200.2	178.6	176.7	2722.1	2852.1	2339.7	2005.2	2157.9	1069.4	1644.5	1074.5		1174.3	2117.1		1589.7	2276.8		5347.1	2339.7		5823.8	2339.7
275.8	396.7	2296.6	2356.2	2296.6	948.6	2356.2	948.6	1995.2	2362.1	2084	2093.5	2196.2	2130.2	2165.5	2276.6		1197.8	1207.9	136.9	172.4	2335	2496.4	178.9	151	1039.7	1084.3	1289.1	963.1	2054.2	1068.2	4045.1	1071.5		396.7	2362.1		948.6	2276.6		1197.8	1289.1		1028.3	1289.1
1498.9	2097.5	2450.5	2301.6	2450.5	1719	2301.6	1719	2013.6	2439.7	2179.8	2163.4	2551.4	2130.1	2314.2	2276.3		2219.4	2310.2	180.2	173	8082.1	7814.8	179.3	151.4	2382.2	2571.5	2648.6	2269.5	2419.4	1066.6	1726.3	1069.4		2097.5	2439.7		1719	2276.3		2219.4	2648.6		2210.3	2648.6
1938.3	2225	2624.5	2535.2	2624.5	1945	2535.2	1945	1921.1	2367.5	2242.6	2399.2	2217.6	2128.1	2314.4	2267.4		2708.9	2788.1	68.1	173.5	1265.8	1395.2	179.7	95.3	2390.7	2564.6	2263	2005.4	2385.3	1061.5	1726.7	1068.2		2225	2367.5		1945	2267.4		2708.9	2263		4257.8	2263
630.2	1400.7	1943.4	1481	1943.4	1267.8	1481	1267.8	2985	3754.6	1546.9	2212.4	2225.1	2125.1	2137.4	2262.5		1678.8	1591.6	176.6	173.5	5677.5	5251.1	179.8	172.1	1570.9	1686.8	1513.9	1347.1	2063.1	1059.6	2128.7	1066.6		1400.7	3754.6		1267.8	2262.5		1678.8	1513.9		1490.9	1513.9
1665.5	1951.1	2139.8	2133.4	2139.8	1529.1	2133.4	1529.1	2012.2	2370.5	2365.4	2230.3	2481.6	2122.9	2608.6	2259.6		3461.2	3455.9	199.7	174.5	3511	4541.2	180.1	23.4	3540.4	3021	3442.2	2709.2	3198.3	1049.3	1942.5	1061.5		1951.1	2370.5		1529.1	2259.6		3461.2	3442.2		3248.1	3442.2
1288.2	1371.5	2459.7	2492.7	2459.7	1394.6	2492.7	1394.6	2074.6	2504	2232.8	2257.1	2462.3	2117.8	1834.6	2257.4		4988.5	4989.4	193.9	174.6	3042.7	3351.7	180.9	163.7	3144.8	3466	2415	2219	2313.5	1047.7	1670.4	1059.6		1371.5	2504		1394.6	2257.4		4988.5	2415		5430.2	2415
2063	2381.6	2663.3	2598.9	2663.3	1878.4	2598.9	1878.4	1921.2	2305.3	3961.8	2756.3	2279.1	2115.8	2458.3	2251.4		3083.2	3072.2	158.3	175.7	2093.6	2215.6	181.3	160	3338.9	3449.6	3224.8	2930.9	1969.7	1045.9	2715.1	1049.3		2381.6	2305.3		1878.4	2251.4		3083.2	3224.8		3281.3	3224.8
1462.9	1810.6	2375	2272.4	2375	1539.5	2272.4	1539.5	2030.2	2391.7	2274.4	2107	2203.9	2111.9	2343.4	2247		2698.3	2627.8	35.2	176.1	2060.9	2562.3	181.3	166.1	2891.9	2752.2	2938.5	2504.8	2708.3	1044.8	2106	1047.7		1810.6	2391.7		1539.5	2247		2698.3	2938.5		2438.5	2938.5
1415.1	1730.4	2497	2349.2	2497	1719	2349.2	1719	2116.3	2545.1	2241.5	2116.6	884.4	2110.4	2358	2246.8		1210.3	1240.1	164.3	176.3	1874.6	2273.9	182	193.1	1381.1	1393.1	1526.6	1177.4	1376.6	1042.7	1732.3	1045.9		1730.4	2545.1		1719	2246.8		1210.3	1526.6		1236.1	1526.6
388.7	474.6	1022.7	813.9	1022.7	618.3	813.9	618.3	2027	2015.1	1963.4	2074.5	493	2102.2	2147.5	2242.9		2775.1	2682.2	152.3	176.6	2898.8	2763.2	182	164.9	2414.9	2488.7	2278.8	1887.7	2134.8	1042	2454.6	1044.8		474.6	2015.1		618.3	2242.9		2775.1	2278.8		2545.6	2278.8
1903.3	2270.9	2570.2	2540.9	2570.2	1835.4	2540.9	1835.4	1912.9	2334.9	2196.2	2056.3	1122.6	2091.7	2351.2	2233.4		8725.1	9038.6	121	176.9	2332.3	2880.7	182.7	118	3296.5	3372.1	2883.3	2348.9	1943.3	1040.4	1136.2	1042.7		2270.9	2334.9		1835.4	2233.4		8725.1	2883.3		7997.4	2883.3
1315.4	1512.5	2303.6	2288.8	2303.6	1581.4	2288.8	1581.4	1772.1	2204.3	2551.4	2447.1	2214.8	2087.9	2093.5	2206.5		1459.5	1446.8	190.4	177.2	1963.4	2535.5	183.6	186.3	1408.1	1558.8	1389.1	1216.4	2045.3	1037.6	1812.9	1042		1512.5	2204.3		1581.4	2206.5		1459.5	1389.1		1383.7	1389.1
1688.6	1937	2515.1	2535.7	2515.1	1736.8	2535.7	1736.8	1902.9	2318.1	2217.6	2024.6	2320.3	2084	2163.4	2204.3		5907.9	5620.6	175.5	177.2	1994.8	2336.5	183.7	182.1	2648.2	2964.5	1722.1	1644.5	1476	1035.2	1630.7	1040.4		1937	2318.1		1736.8	2204.3		5907.9	1722.1		5323.3	1722.1
1291	1712.7	2024.4	2008.3	2024.4	1502	2008.3	1502	1968	2438.7	2225.1	2234.8	1800.3	2072.9	2399.2	2198.9		4474.6	4604.1	141	177.3	2255.9	2881	184.3	193.5	4865.6	4986.1	4400	4045.1	2725.4	1031.9	1674.4	1037.6		1712.7	2438.7		1502	2198.9		4474.6	4400		6569.8	4400
480.8	836.7	2385.8	2410.1	2385.8	1538.1	2410.1	1538.1	1755.9	2101.6	2481.6	2358.5	2262.4	2070.8	2212.4	2181.3		3550.5	3618.2	149.3	177.5	1540	1681.8	185.1	29.1	2506.9	2663.5	2157.9	1726.3	2084.2	1029.2	1148.6	1035.2		836.7	2101.6		1538.1	2181.3		3550.5	2157.9		3412.8	2157.9
1766.9	2106.5	2555	2617.4	2555	1773.2	2617.4	1773.2	1892.6	2249.9	2462.3	2306.8	974.7	2069.9	2230.3	2179.7		2508.1	2375.5	181.6	177.6	1991.5	2433.4	185.4	127.9	2231.2	2413.2	2054.2	1726.7	3208.6	1028.2	2360	1031.9		2106.5	2249.9		1773.2	2179.7		2508.1	2054.2		2325.4	2054.2
1623.2	2089.6	2681	2685.9	2681	1951.9	2685.9	1951.9	1882	2288.1	2279.1	2114.9	2005.9	2066.7	2257.1	2176.6		2725.2	2520.9	136.1	178	1604.9	1875.7	185.8	176	2633.5	2751	2419.4	2128.7	1144.4	1023.8	1745.9	1029.2		2089.6	2288.1		1951.9	2176.6		2725.2	2419.4		2388.1	2419.4
2170.8	1490	3133.6	3494.7	3133.6	2326.6	3494.7	2326.6	1444.4	1631.5	2203.9	2249.4	449.6	2054.6	2756.3	2171.4		2348.6	2293.3	174.6	178.2	1723.6	1949.2	186.8	162.4	2465.7	2155.9	2385.3	1942.5	1801.8	1021	1405.5	1028.2		1490	1631.5		2326.6	2171.4		2348.6	2385.3		2369.8	2385.3
1819.3	2103.3	2620.3	2430.3	2620.3	1793.1	2430.3	1793.1	1967.8	2303.4	884.4	2008.5	2167.2	2049.7	2107	2169.8		2743.1	3089.3	132.1	178.6	1039.6	973.1	187.2	201.3	1984.5	2181.6	2063.1	1670.4	1054.3	1019.7	866.9	1023.8		2103.3	2303.4		1793.1	2169.8		2743.1	2063.1		3542.4	2063.1
1653.6	2182.6	2551.1	2549.1	2551.1	1864.7	2549.1	1864.7	1968.6	2353.5	493	1913.6	2021.9	2043.6	2116.6	2147		2908.5	2895.5	141.4	178.9	3112.8	3642.8	187.7	185.5	3206.4	3086.3	3198.3	2715.1	2746.4	1017.8	1550.1	1021		2182.6	2353.5		1864.7	2147		2908.5	3198.3		3197.3	3198.3
942.1	1158.9	1755.9	1748.3	1755.9	1238.5	1748.3	1238.5	1693.8	2057.8	1122.6	1892.7	1461.7	2042.5	2074.5	2133.5		2600.7	2360.1	114.4	179.3	4634.2	3262.7	190.1	183.9	2694.1	2888.9	2313.5	2106	1854.8	1014.9	776.3	1019.7		1158.9	2057.8		1238.5	2133.5		2600.7	2313.5		2602.2	2313.5
1535	2129	2445.9	2512	2445.9	1794.4	2512	1794.4	1820.9	2145.5	2214.8	2159.5	2086.7	2037.7	2056.3	2130.2		2556	2425.7	79.1	179.7	1765.2	1892.7	190.5	180.2	1995.5	2189.5	1969.7	1732.3	1960.6	1014	2159.2	1017.8		2129	2145.5		1794.4	2130.2		2556	1969.7		2293.4	1969.7
1675.7	2279.6	2536.4	2358.7	2536.4	1749.7	2358.7	1749.7	1882.5	2335.6	2320.3	2145.9	2052.2	2035	2447.1	2130.1		2890	2798	143.2	179.8	1339	1084.8	191.2	190.7	2898.3	3128.3	2708.3	2454.6	1674.5	1011.8	1373.3	1014.9		2279.6	2335.6		1749.7	2130.1		2890	2708.3		3195.6	2708.3
1100.2	1365.1	1608.8	1627.7	1608.8	1244.7	1627.7	1244.7	1786.9	2187.6	1800.3	2021.6	1400.4	2030.6	2024.6	2128.1		1844.5	1740.7	19.8	180.1	4610.1	4192	191.3	140.3	1242.3	1355.3	1376.6	1136.2	2117.4	1008.1	1604.9	1014		1365.1	2187.6		1244.7	2128.1		1844.5	1376.6		1666.9	1376.6
898.3	1362.5	1861	1794.7	1861	1273.3	1794.7	1273.3	1939.2	2448.3	2262.4	2200.1	2195.6	2029.9	2234.8	2125.1		2618.2	2496.8	140.6	180.9	875.8	796.1	191.7	132.7	2327.1	2512.6	2134.8	1812.9	1782.7	1007.6	1444.8	1011.8		1362.5	2448.3		1273.3	2125.1		2618.2	2134.8		2632.4	2134.8
1323.7	1763.3	1881.8	1802.9	1881.8	1415.3	1802.9	1415.3	1664.9	2140.3	974.7	1937.7	2496	2029.5	2358.5	2122.9		1975.6	1942.1	195	181.3	2045.4	2349.9	192.5	176.3	2078.7	2096	1943.3	1630.7	2325.3	1007.5	1052.4	1008.1		1763.3	2140.3		1415.3	2122.9		1975.6	1943.3		1944.4	1943.3
1839.2	2295.5	2534.4	2502.9	2534.4	1816.4	2502.9	1816.4	1818.7	2248.3	2005.9	2165.9	1644.7	2020.9	2306.8	2117.8		2163	2166.3	147.5	181.3	2914.6	2816.9	192.6	37.8	2035	2035.5	2045.3	1674.4	1179.9	1007.2	1388.8	1007.6		2295.5	2248.3		1816.4	2117.8		2163	2045.3		2015.2	2045.3
1398.4	1665.9	1921	1851.7	1921	1416.4	1851.7	1416.4	1781.7	2174.7	449.6	1293.6	2266.5	2019.8	2114.9	2115.8		1254.4	1133.9	148.1	182	1406.2	1720.1	195.3	200.8	1340.7	1487.9	1476	1148.6	1679.3	998.8	1997.4	1007.5		1665.9	2174.7		1416.4	2115.8		1254.4	1476		1502.1	1476
1733.4	1823.8	2233.5	2126.4	2233.5	1548.8	2126.4	1548.8	1722.2	2230.2	2167.2	1997.4	1318.3	2015.2	2249.4	2111.9		3935	3843.1	175.3	182	9594.3	6456	196.1	144.8	3195.5	3344.2	2725.4	2360	1285.7	996.5	961	1007.2		1823.8	2230.2		1548.8	2111.9		3935	2725.4		3728.5	2725.4
365.6	592.2	2042.7	2032	2042.7	1092.7	2032	1092.7	1772.3	2140	2021.9	2000.5	1354.7	2008.7	2008.5	2110.4		3938	4929.3	92.7	182.7	1468.8	1853.7	197	195.1	2020.4	2146.8	2084.2	1745.9	1858.7	990.1	1420.7	998.8		592.2	2140		1092.7	2110.4		3938	2084.2		4246.3	2084.2
184.4	301.9	1695.8	1334.5	1695.8	537.8	1334.5	537.8	2400.7	3002.3	1461.7	2155.5	2182.3	2000.6	1913.6	2102.2		2947.7	3415.7	191.6	183.6	4621.6	4753.6	197.3	211	2375.6	2441.1	3208.6	1405.5	1997.4	988.3	1154.4	996.5		301.9	3002.3		537.8	2102.2		2947.7	3208.6		6702.4	3208.6
272.2	513.1	1663.1	1319.3	1663.1	745.2	1319.3	745.2	2566.9	3138	2086.7	1980.4	2197	1990.8	1892.7	2091.7		1328.8	1309.4	142.6	183.7	2288.8	2697.7	197.6	166.7	973.7	990.1	1144.4	866.9	1648.3	986.4	1618.7	990.1		513.1	3138		745.2	2091.7		1328.8	1144.4		1173.3	1144.4
1402.4	1730	2065.5	1989.6	2065.5	1495.5	1989.6	1495.5	1788.3	2168.8	2052.2	2038.7	966.5	1990	2159.5	2087.9		4890.1	4599.2	179	184.3	1310	1227.9	197.7	73.5	2035.1	2178.8	1801.8	1550.1	2251.9	984.4	1626.5	988.3		1730	2168.8		1495.5	2087.9		4890.1	1801.8		4224.6	1801.8
1625.1	1989	2376	2307.8	2376	1721.9	2307.8	1721.9	1874.3	2156.4	1400.4	1860.6	2234.7	1986.1	2145.9	2084		916	909	29.6	185.1	1202.4	1512.4	198.1	167.7	854.2	853.5	1054.3	776.3	3422.8	984.3	1432.4	986.4		1989	2156.4		1721.9	2084		916	1054.3		768.4	1054.3
1228.2	1512.8	2355.9	2288.4	2355.9	1503.1	2288.4	1503.1	1866.1	2230.6	2195.6	2135.8	1988.1	1983.8	2021.6	2072.9		2264.5	2338.2	127.3	185.4	1020.3	1200.7	199.4	207.5	2532.1	2362.2	2746.4	2159.2	1945.6	984.2	1967.4	984.4		1512.8	2230.6		1503.1	2072.9		2264.5	2746.4		2245.1	2746.4
1049.6	1318.7	1963.2	1937.7	1963.2	1373.6	1937.7	1373.6	1731	2103.9	2496	2477.7	2191.4	1983.6	2200.1	2070.8		3295.8	3119	185.7	185.8	2926.5	2743.9	199.5	208	1708.2	1847.5	1854.8	1373.3	2975.2	979.7	2773.8	984.3		1318.7	2103.9		1373.6	2070.8		3295.8	1854.8		3103.2	1854.8
646.7	748.1	2044.3	2022.4	2044.3	915.2	2022.4	915.2	2052	2444.5	1644.7	2202.1	2039	1982.8	1937.7	2069.9		1886.7	1840.2	151.3	186.8	2999.5	2967.2	200.2	191.4	1977.6	2008.2	1960.6	1604.9	2921.2	978.9	1525.2	984.2		748.1	2444.5		915.2	2069.9		1886.7	1960.6		2376.6	1960.6
1526.7	1763.7	2241.3	2186.6	2241.3	1539.3	2186.6	1539.3	1925.2	2387.1	2266.5	2279.5	1807	1980.9	2165.9	2066.7		7909.1	10052.4	174	187.2	1896.1	2121.5	200.7	161.2	1819.7	1933.6	1674.5	1444.8	2979.5	978.9	2355.8	979.7		1763.7	2387.1		1539.3	2066.7		7909.1	1674.5		8270.6	1674.5
167.2	369.5	2151.9	2252.1	2151.9	839	2252.1	839	1498.8	1971.3	1318.3	2000.9	2289.8	1978.5	1293.6	2054.6		2705.9	3301.7	198.5	187.7	1962.4	2407.9	200.8	159.5	1662.3	1686.4	2117.4	1052.4	3192	976.4	2413.1	978.9		369.5	1971.3		839	2054.6		2705.9	2117.4		7199.1	2117.4
1654.3	2001.8	2473.9	2423.1	2473.9	1766.5	2423.1	1766.5	1764.7	2140.6	1354.7	1839.7	2654.7	1974.8	1997.4	2049.7		5247.9	5195.7	141.4	190.1	3931	4177	200.9	209.4	1916	2090.6	1782.7	1388.8	2260.5	972.4	2384.4	978.9		2001.8	2140.6		1766.5	2049.7		5247.9	1782.7		4602.2	1782.7
1382.3	1821.6	2397.7	2592.8	2397.7	1821.9	2592.8	1821.9	1624.1	1898.9	2182.3	2141.2	1920.3	1968.3	2000.5	2043.6		2892.3	2882.2	131.9	190.5	2468.2	2889.4	201.2	216.8	2722.8	2810	2325.3	1997.4	2413.9	972	2691.7	976.4		1821.6	1898.9		1821.9	2043.6		2892.3	2325.3		2753.4	2325.3
685.2	1031.8	1970.5	1858.5	1970.5	1301.7	1858.5	1301.7	1890.7	2228.7	2197	2193.9	1074.7	1964.2	2155.5	2042.5		1492.8	1347.5	180	191.2	2266.1	2701.1	202	185.4	1098.7	1209.4	1179.9	961	1086.3	971.9	1989.5	972.4		1031.8	2228.7		1301.7	2042.5		1492.8	1179.9		1298.8	1179.9
1042.5	1347.8	1669.8	1694.7	1669.8	1271.1	1694.7	1271.1	1654.1	2057.2	966.5	1760.5	1662.6	1964	1980.4	2037.7		1395	1492.6	128	191.3	2314.7	2578.9	202.1	77.6	1682	1826.4	1679.3	1420.7	1365.8	965	2244	972		1347.8	2057.2		1271.1	2037.7		1395	1679.3		1859.4	1679.3
1354.7	1667.2	2085.1	2093.8	2085.1	1514.9	2093.8	1514.9	1713.7	2084.2	2234.7	2090.1	2032.5	1962.8	2038.7	2035		1201.2	1146.3	97.3	191.7	3694.8	3772.3	202.3	181.8	1303.6	1401.6	1285.7	1154.4	2141	961.9	1011.4	971.9		1667.2	2084.2		1514.9	2035		1201.2	1285.7		1407.7	1285.7
310.7	1256.2	2404.9	1226.6	2404.9	1410.2	1226.6	1410.2	5361.1	6699.4	1988.1	2010.9	1912.8	1958.5	1860.6	2030.6		3057	2919.7	170.8	192.5	2460.6	3033.4	202.4	211.9	2010	2133.6	1858.7	1618.7	2137.7	961	1125.6	965		1256.2	6699.4		1410.2	2030.6		3057	1858.7		2663.7	1858.7
1651.5	1921.1	2371.2	2272.1	2371.2	1641.1	2272.1	1641.1	1767	2151.8	2191.4	2023.3	2177.8	1952.3	2135.8	2029.9		3012.9	3166.1	29.1	192.6	1573.8	1603.7	202.5	181.5	2060.8	2332	1997.4	1626.5	3846.9	956.2	1870.9	961.9		1921.1	2151.8		1641.1	2029.9		3012.9	1997.4		2926	1997.4
1581	1894.9	2148.5	2160.4	2148.5	1542	2160.4	1542	1657.4	2067.7	2039	1977.7	1849.5	1947	2477.7	2029.5		2165.9	2124.8	154.1	195.3	18493.9	13806.8	202.6	187	1722	1921.5	1648.3	1432.4	1905	954.3	1935	961		1894.9	2067.7		1542	2029.5		2165.9	1648.3		2089.3	1648.3
567.7	917.4	2118.1	2098.5	2118.1	1333	2098.5	1333	1728	2006.3	1807	2147.3	1027.3	1945	2202.1	2020.9		2483.1	2448.7	128.8	196.1	1092.4	1068.8	202.9	200.2	2456.8	2647.1	2251.9	1967.4	3168.8	948.4	3329.5	956.2		917.4	2006.3		1333	2020.9		2483.1	2251.9		2512.6	2251.9
1723.6	2088.9	2258.9	2259.7	2258.9	1640.8	2259.7	1640.8	1854	2259.6	2289.8	2149.2	1991.7	1943	2279.5	2019.8		4365.1	4483.5	207.7	197	1488	1392.4	203.3	105.9	3631.9	3577.2	3422.8	2773.8	1130.8	948.2	1606.9	954.3		2088.9	2259.6		1640.8	2019.8		4365.1	3422.8		4105.8	3422.8
453.7	705.9	1263.9	1285.9	1263.9	826.2	1285.9	826.2	1818.2	2264.9	2654.7	2464.2	1998.3	1938.5	2000.9	2015.2		3017.6	3012.9	249.5	197.3	2173.9	2206.9	204.2	183.6	2188.2	2219.3	1945.6	1525.2	2442.7	946.8	2734.7	948.4		705.9	2264.9		826.2	2015.2		3017.6	1945.6		2990.4	1945.6
249.1	1388.1	2310.1	912.1	2310.1	1559.1	912.1	1559.1	5069.8	6545.3	1920.3	1981.9	1270.7	1937.8	1839.7	2008.7		2929.6	2707.4	128.8	197.6	4267.9	4510.6	204.2	202.5	2978.3	2840.3	2975.2	2355.8	1758.4	941.5	886.5	948.2		1388.1	6545.3		1559.1	2008.7		2929.6	2975.2		2719.4	2975.2
1313	1639.8	2284.2	2210.1	2284.2	1578.1	2210.1	1578.1	1756.3	2137.4	1074.7	1867.7	1084.8	1937	2141.2	2000.6		2838.8	2710.3	61.9	197.7	6318.3	6491.6	204.8	213.7	3280.9	3193.1	2921.2	2413.1	1890.5	940.5	2114.3	946.8		1639.8	2137.4		1578.1	2000.6		2838.8	2921.2		2541.1	2921.2
1514.7	1918.5	2351.5	2311.3	2351.5	1760.7	2311.3	1760.7	1726	2046.7	1662.6	1985.9	1975.4	1922.5	2193.9	1990.8		4232.9	4185.5	190.2	198.1	5953.3	4716.9	206.2	145.7	3042.4	2994.3	2979.5	2384.4	1674.7	939.4	1505.5	941.5		1918.5	2046.7		1760.7	1990.8		4232.9	2979.5		4824.1	2979.5
519.4	753.7	2331.4	2340.6	2331.4	997.7	2340.6	997.7	1870.8	2236.5	2032.5	2072.1	2074.7	1921.2	1760.5	1990		3303.5	3095.3	188.9	199.4	5445.3	5812.9	206.3	197.5	3391	3189.8	3192	2691.7	2266.4	939	1676.8	940.5		753.7	2236.5		997.7	1990		3303.5	3192		3013.6	3192
1394.6	1788.8	1927	1908.8	1927	1469.4	1908.8	1469.4	1741.5	2180.5	1912.8	2073	2190.2	1914.6	2090.1	1986.1		1755.8	1736.5	184.7	199.5	1889.6	1735.8	206.9	148	2374.7	2570	2260.5	1989.5	1455.1	937.6	1496.7	939.4		1788.8	2180.5		1469.4	1986.1		1755.8	2260.5		1489.6	2260.5
1496.3	1781.6	2034.5	2048.3	2034.5	1435.7	2048.3	1435.7	1755.7	2075.5	2177.8	2151.1	2436.4	1912	2010.9	1983.8		17260.1	19649.9	180.4	200.2	2276.8	2548.8	207.8	177.5	3076.6	3174.7	2413.9	2244	1483	937.2	1882.8	939		1781.6	2075.5		1435.7	1983.8		17260.1	2413.9		17392.8	2413.9
1363.2	1627.2	1922.2	1914	1922.2	1373.6	1914	1373.6	1716.5	2034	1849.5	2022.8	1924.4	1909.6	2023.3	1983.6		1238.7	1176.2	187.4	200.7	2022.9	2262.3	208.3	184.9	1128.5	1352.7	1086.3	1011.4	1931.8	936	1270.7	937.6		1627.2	2034		1373.6	1983.6		1238.7	1086.3		1168.5	1086.3
1202.5	1448.6	1807.5	1739.2	1807.5	1270.2	1739.2	1270.2	1751.6	2006.7	1027.3	1767.1	1411.3	1909	1977.7	1982.8		1608.7	1543	155.8	200.8	1372.1	1689.9	208.6	209.5	1327.9	1462.8	1365.8	1125.6	3572.7	930.8	1266.1	937.2		1448.6	2006.7		1270.2	1982.8		1608.7	1365.8		1446.1	1365.8
807.9	1233.3	2150	2091.6	2150	1404.2	2091.6	1404.2	1685.1	2011.7	1991.7	1980.8	2071.9	1907	2147.3	1980.9		2591	2477.6	194.9	200.9	1193.5	1514.8	208.6	198.1	2302.5	2454.2	2141	1870.9	1100	928.6	1669.1	936		1233.3	2011.7		1404.2	1980.9		2591	2141		2224.8	2141
1654.6	1872.1	2039.2	2109.6	2039.2	1587.4	2109.6	1587.4	1692.3	2085.3	1998.3	1940.7	2150	1901.8	2149.2	1978.5		4482.2	4460.9	194.6	201.2	1860.4	2345.5	209.3	207.8	2638	2842	2137.7	1935	2058.6	927.9	2923.8	930.8		1872.1	2085.3		1587.4	1978.5		4482.2	2137.7		4779.8	2137.7
1512.8	1711.1	2013	2096.4	2013	1494.5	2096.4	1494.5	1619.4	1987	1270.7	1691.5	1579.2	1886.7	2464.2	1974.8		7264.5	6896.4	194.7	202	8190.8	6435.3	209.4	185.9	4746.8	5215.6	3846.9	3329.5	2516.1	923.5	986.7	928.6		1711.1	1987		1494.5	1974.8		7264.5	3846.9		6499.2	3846.9
970.9	1232.2	1165	1169	1165	1173	1169	1173	1651.7	2002.8	1084.8	1676.2	1459.1	1878	1981.9	1968.3		5689.8	5706.2	72	202.1	1484.6	1538.4	210.6	246.3	1917.2	2075.1	1905	1606.9	1159	921.5	1798.3	927.9		1232.2	2002.8		1173	1968.3		5689.8	1905		5273	1905
425.1	644.9	1714.4	1778.1	1714.4	1018.8	1778.1	1018.8	1616.1	1891.5	1975.4	1990.3	1429.7	1871.6	1867.7	1964.2		6196.4	5961.6	158.6	202.3	1660.1	2006.3	211.3	162.3	3794.5	3903.2	3168.8	2734.7	4724.6	921	1948.7	923.5		644.9	1891.5		1018.8	1964.2		6196.4	3168.8		5508.2	3168.8
705.3	915.6	1753.2	1759.3	1753.2	1169.3	1759.3	1169.3	1616	1974.5	2074.7	1931.5	583.3	1870.2	1985.9	1964		2040.1	2108.3	182.9	202.4	2287.1	3000.4	212.5	223.5	1022.8	1109.3	1130.8	886.5	2132.3	915.1	1024.6	921.5		915.6	1974.5		1169.3	1964		2040.1	1130.8		1811	1130.8
1271.4	1621.2	2227.6	2210.3	2227.6	1460.1	2210.3	1460.1	1701.3	2012.8	2190.2	2117.6	1840.8	1864	2072.1	1962.8		2769.1	2662.9	174.1	202.5	1438	1599.1	213.5	207.5	2554.3	2621.4	2442.7	2114.3	1754.8	914.4	2228.6	921		1621.2	2012.8		1460.1	1962.8		2769.1	2442.7		2643.9	2442.7
1083.6	1546.8	2095.8	2076.5	2095.8	1507.5	2076.5	1507.5	1689.2	2056.4	2436.4	2215.7	1949.2	1859.9	2073	1958.5		2517.8	2409.2	159.9	202.6	1394.9	1652.5	215.1	169.9	2060.6	2286.4	1758.4	1505.5	1431.2	910.2	1897	915.1		1546.8	2056.4		1507.5	1958.5		2517.8	1758.4		2608.6	1758.4
1667.8	2052.1	2219.5	2270.9	2219.5	1594.8	2270.9	1594.8	1783	2152.2	1924.4	1884.8	1940.5	1856.4	2151.1	1952.3		1755	1631.2	164.1	202.9	2901.2	3182.1	217.1	202	1946.9	2083.1	1890.5	1676.8	1530.3	908.3	1508.6	914.4		2052.1	2152.2		1594.8	1952.3		1755	1890.5		1889	1890.5
1200.8	1446.4	2239.7	2264.4	2239.7	1480.7	2264.4	1480.7	1737.1	2023.2	1411.3	1953	2195.7	1856.1	2022.8	1947		1557.8	1494.7	275.3	203.3	822.5	1018.3	218	189.7	1620.5	1752.6	1674.7	1496.7	2380	901.9	1260.5	910.2		1446.4	2023.2		1480.7	1947		1557.8	1674.7		1790.7	1674.7
528	740	2134.2	2224.1	2134.2	1061.7	2224.1	1061.7	1725.7	2080.3	2071.9	2163	1181.6	1849.8	1767.1	1945		2472.6	2381.8	171.4	204.2	1640.9	2566.4	219.1	191	2343.3	2357.1	2266.4	1882.8	1856.8	901.2	1340.9	908.3		740	2080.3		1061.7	1945		2472.6	2266.4		2369.7	2266.4
887	985.9	1210.6	1241.5	1210.6	914.7	1241.5	914.7	1488	1785.8	2150	2128.8	1130	1846.6	1980.8	1943		3651.8	8098.2	188.9	204.2	1550.8	1768.2	221.6	210.4	1083.6	1122.2	1455.1	1270.7	2102.8	900.3	1830.5	901.9		985.9	1785.8		914.7	1943		3651.8	1455.1		7991.8	1455.1
1207.3	1615.3	1993.1	2117	1993.1	1445.8	2117	1445.8	1560.9	1781.2	1579.2	1881.4	1599.3	1843.7	1940.7	1938.5		1759.7	1687.6	218.2	204.8	2179.2	2603.8	221.7	180.3	1466.8	1611.6	1483	1266.1	1670.3	898.6	1542.9	901.2		1615.3	1781.2		1445.8	1938.5		1759.7	1483		1560.9	1483
707.7	983.1	1942.1	1954.1	1942.1	1177.3	1954.1	1177.3	1643.4	1973.5	1459.1	1665.9	1787.8	1836.9	1691.5	1937.8		2241.8	2112.5	223.5	206.2	3486.7	3263	222.2	251.7	1996.2	2151.8	1931.8	1669.1	1415.9	897.6	1864	900.3		983.1	1973.5		1177.3	1937.8		2241.8	1931.8		2183.5	1931.8
558.9	660.3	1429.8	1436.7	1429.8	785.3	1436.7	785.3	1668	2030.2	1429.7	2144.1	2021.2	1835.7	1676.2	1937		3042.4	2903.6	174.6	206.3	1818.5	2072.8	222.2	186	3778.1	3543.9	3572.7	2923.8	1310.6	894.6	1474.8	898.6		660.3	2030.2		785.3	1937		3042.4	3572.7		2994.4	3572.7
1185.2	1663.6	2218.3	2171.1	2218.3	1521.6	2171.1	1521.6	1676.8	1994.2	583.3	1405.2	1983.4	1832	1990.3	1922.5		1594.4	1645.5	126.1	206.9	2132.4	2290.1	222.9	215	1226.6	1402.9	1100	986.7	2161.1	889.3	1323.7	897.6		1663.6	1994.2		1521.6	1922.5		1594.4	1100		1612.8	1100
1445.7	1759.3	1986.8	1998.2	1986.8	1365.6	1998.2	1365.6	1694	2014.5	1840.8	1817.7	1924.1	1828.4	1931.5	1921.2		1618.9	1660.1	198.1	207.8	1684.8	1909.2	223	53.3	1900.9	1944.5	2058.6	1798.3	95.4	888.3	1042.8	894.6		1759.3	2014.5		1365.6	1921.2		1618.9	2058.6		3759.5	2058.6
1479.4	1734	1923.7	1966.4	1923.7	1434.2	1966.4	1434.2	1646.7	2004.6	1949.2	1993.8	1757.8	1824	2117.6	1914.6		3445.2	3714.3	210	208.3	1590.9	2037.1	223.5	134.4	2666.6	2536.6	2516.1	1948.7	1373.2	884.9	1857.6	889.3		1734	2004.6		1434.2	1914.6		3445.2	2516.1		3283.4	2516.1
1618.9	2295.1	2472.9	2298.6	2472.9	1772.3	2298.6	1772.3	1752.6	2076.5	1940.5	1957.4	1852.5	1822.4	2215.7	1912		979	966.3	165.4	208.6	1625	1774.2	223.6	227.8	1165.3	1256.4	1159	1024.6	1693.9	881.5	375.4	888.3		2295.1	2076.5		1772.3	1912		979	1159		1127.4	1159
1579.3	1614.7	1827.1	1945.3	1827.1	1361.1	1945.3	1361.1	1545.2	1958.5	2195.7	2032.9	1918.8	1814.2	1884.8	1909.6		3579.5	4426.4	190.4	208.6	1100.4	1306.1	223.6	238.3	4046.4	3784.1	4724.6	2228.6	1135.5	880.2	1161.2	884.9		1614.7	1958.5		1361.1	1909.6		3579.5	4724.6		11469.4	4724.6
534.9	684.6	1655	1579.8	1655	873.5	1579.8	873.5	1632.2	1973.3	1181.6	1791.5	1253.1	1813.8	1953	1909		1799.6	1776.3	175.5	209.3	1058.9	1224.9	223.9	225.8	2124.3	2192.1	2132.3	1897	1320.1	875.6	1503.8	881.5		684.6	1973.3		873.5	1909		1799.6	2132.3		1844.1	2132.3
939.1	1726.6	1970.9	1627.7	1970.9	1665.1	1627.7	1665.1	2085	2726.5	1130	1822.8	1180.3	1811.5	2163	1907		2751.6	2600.6	202.8	209.4	2637	3083.1	224.8	198.9	2073.6	2208	1754.8	1508.6	542.8	873.7	981.6	880.2		1726.6	2726.5		1665.1	1907		2751.6	1754.8		2621.4	1754.8
1398.6	1839.8	2120.2	2000.2	2120.2	1576.9	2000.2	1576.9	1762.4	2183.9	1599.3	1846.8	1235.8	1809.6	2128.8	1901.8		3622.9	3822.6	243.1	210.6	28.1	73.4	225.7	152.1	1538.9	1710.4	1431.2	1260.5	3349.9	872.3	1164.3	875.6		1839.8	2183.9		1576.9	1901.8		3622.9	1431.2		3519.1	1431.2
671.4	751.9	1052.4	1093.9	1052.4	830.1	1093.9	830.1	1556.5	1893.2	1787.8	1897.6	1344.3	1808.8	1881.4	1886.7		2103.4	2125.6	129	211.3	619.9	680.7	226.8	216.9	1864.9	2040.9	1530.3	1340.9	2071.7	871.7	427.9	873.7		751.9	1893.2		830.1	1886.7		2103.4	1530.3		2075.2	1530.3
774	889.2	1485	1534.3	1485	981.7	1534.3	981.7	1542.5	1830.9	2021.2	1976.9	1758.6	1808.6	1665.9	1878		2624.3	2522.8	193.1	212.5	1184.9	1422.6	227	235.6	2567.8	2312	2380	1830.5	1863.6	871.4	2495.9	872.3		889.2	1830.9		981.7	1878		2624.3	2380		2140	2380
536.2	791.8	1895.4	1956.3	1895.4	1129.5	1956.3	1129.5	1737.2	2130.4	1983.4	1848.3	2014.3	1807.9	2144.1	1871.6		2039.6	1956.1	218.3	213.5	1155.6	1172.9	227.8	223.6	1883.3	1995	1856.8	1542.9	2861.2	869.5	1786.7	871.7		791.8	2130.4		1129.5	1871.6		2039.6	1856.8		1888.5	1856.8
308.2	393	1437.9	1441.3	1437.9	567.2	1441.3	567.2	1498.8	1841.3	1924.1	1949.6	2001.8	1800.7	1405.2	1870.2		2140.8	2076.5	170.6	215.1	2693.4	2693.5	228.5	193	2304.3	2325.6	2102.8	1864	1585.3	865.8	1542.9	871.4		393	1841.3		567.2	1870.2		2140.8	2102.8		2054.8	2102.8
1302.1	1780.5	2097.2	2016.6	2097.2	1549.5	2016.6	1549.5	1651.4	2061.9	1757.8	1883.2	1622.4	1800.2	1817.7	1864		1915.6	1814.3	178.6	217.1	321.2	405.4	229	204	1849.4	2001.5	1670.3	1474.8	1364.5	865.8	2455.1	869.5		1780.5	2061.9		1549.5	1864		1915.6	1670.3		1741.4	1670.3
1421.3	1793.3	2295.9	2241.4	2295.9	1600.3	2241.4	1600.3	1628.1	1997	1852.5	1731.5	1226	1800.1	1993.8	1859.9		1382.5	1298.2	171.1	218	3129.9	3092.3	231	231.3	1473.4	1605.2	1415.9	1323.7	1924.9	864.4	1483.9	865.8		1793.3	1997		1600.3	1859.9		1382.5	1415.9		1363.3	1415.9
1186.6	1625.7	1922	1842.7	1922	1431.1	1842.7	1431.1	1665.4	2008.1	1918.8	1794.7	1244.6	1796.1	1957.4	1856.4		1365.6	1230.1	150.3	219.1	1830.2	2263.9	231.4	186.9	1302.6	1418.1	1310.6	1042.8	1194	863.8	1237.7	865.8		1625.7	2008.1		1431.1	1856.4		1365.6	1310.6		1346.8	1310.6
1523	1835.8	2207	2177.7	2207	1506.1	2177.7	1506.1	1691.9	2126.9	1253.1	1798.7	2002.9	1790.3	2032.9	1856.1		3156.2	3136.5	186.1	221.6	1648.2	1780.6	231.5	209.4	2594.5	2661.4	2161.1	1857.6	1308.5	863.1	1254.2	864.4		1835.8	2126.9		1506.1	1856.1		3156.2	2161.1		3142.8	2161.1
634.5	906.8	2166.8	2208.4	2166.8	1220.3	2208.4	1220.3	1568	1854.1	1180.3	1658.4	1812.2	1787.6	1791.5	1849.8		60.5	64.3	132.9	221.7	4779.9	4802.9	231.5	59.2	106.6	903.5	95.4	375.4	1806.4	861.1	997.9	863.8		906.8	1854.1		1220.3	1849.8		60.5	95.4		143.8	95.4
399.7	612	1790.1	1784.3	1790.1	1082.1	1784.3	1082.1	1588.6	1870	1235.8	1636.8	1937.5	1784.7	1822.8	1846.6		672.9	797.3	212	222.2	1354.7	1723.6	232.4	121.9	1139.5	1181.1	1373.2	1161.2	2234.7	861	1195.5	863.1		612	1870		1082.1	1846.6		672.9	1373.2		1303	1373.2
1045.8	1367	1579.6	1598.5	1579.6	1294.5	1598.5	1294.5	1638.5	1985.7	1344.3	1850.9	1684.4	1781	1846.8	1843.7		1446.2	1366	206.5	222.2	971.7	1150.3	232.9	185.1	1574.3	1731.1	1693.9	1503.8	1174.7	855.7	1504.3	861.1		1367	1985.7		1294.5	1843.7		1446.2	1693.9		1617.3	1693.9
1055.5	1364.4	1891.7	1853.6	1891.7	1260.2	1853.6	1260.2	1738.3	2144.1	1758.6	1693	1694	1775.5	1897.6	1836.9		1331.5	1288.6	160.2	222.9	1809.1	1726	233.4	217.5	1100.3	1194.2	1135.5	981.6	2594	851.6	1808	861		1364.4	2144.1		1260.2	1836.9		1331.5	1135.5		1164.8	1135.5
1396.9	1647.9	2080.9	2046	2080.9	1493	2046	1493	1581.2	1975.1	2014.3	2051.2	2116.5	1770.7	1976.9	1835.7		2793.6	2882.2	45.8	223	1034.9	1144.7	235.2	243.2	1628	1768.8	1320.1	1164.3	4035.8	847.6	1043	855.7		1647.9	1975.1		1493	1835.7		2793.6	1320.1		2900.8	1320.1
1389.4	1698.3	2176.6	2159.1	2176.6	1454.9	2159.1	1454.9	1570.4	1889.5	2001.8	1903.6	2250	1759.9	1848.3	1832		402.5	425.4	109	223.5	2521.9	2706.7	235.2	56.1	432	459.2	542.8	427.9	1948.9	846.4	2258.4	851.6		1698.3	1889.5		1454.9	1832		402.5	542.8		454.5	542.8
1104.6	1478.6	1871.1	1882.2	1871.1	1382.1	1882.2	1382.1	1613.1	1968	1622.4	1829.5	1152.8	1755.3	1949.6	1828.4		3354.6	3349.6	221.5	223.6	1722.4	1813.7	235.2	227.1	3389.5	2588.2	3349.9	2495.9	1502.7	846.3	3486.2	847.6		1478.6	1968		1382.1	1828.4		3354.6	3349.9		3190.3	3349.9
916.7	1233.3	2140	2139	2140	1494.9	2139	1494.9	1547.1	1929.1	1226	1756.3	2114.8	1754.4	1883.2	1824		2480.2	2336.3	176.8	223.6	1672.9	2117.8	235.3	217.7	2198.5	2239.3	2071.7	1786.7	1007.2	844.7	1633.8	846.4		1233.3	1929.1		1494.9	1824		2480.2	2071.7		2468.9	2071.7
1195.9	1326.7	1704.1	1648.9	1704.1	1136	1648.9	1136	1605	1915.1	1244.6	1738.2	1816.1	1754.4	1731.5	1822.4		1921.9	1949.6	220.1	223.9	1041.5	1170	236.6	260.3	1957.8	2027.9	1863.6	1542.9	1717.5	841.6	1234	846.3		1326.7	1915.1		1136	1822.4		1921.9	1863.6		1761	1863.6
1548.7	1816.6	2232.7	2112.4	2232.7	1566.5	2112.4	1566.5	1699.6	2053.4	2002.9	2005.4	2033.8	1752.8	1794.7	1814.2		5294.4	5280.1	210.9	224.8	2450.7	2873.6	239.6	227.7	3279.1	3507.7	2861.2	2455.1	1020.1	840.6	752.8	844.7		1816.6	2053.4		1566.5	1814.2		5294.4	2861.2		4854.8	2861.2
769.2	974.4	1639.7	1602.7	1639.7	993.4	1602.7	993.4	1665.4	2050.6	1812.2	1852.8	1442.6	1747.8	1798.7	1813.8		1728.4	1571	141.4	225.7	2873.1	3579.9	240	252.6	1585.2	1695.1	1585.3	1483.9	1128.1	839.9	1467.4	841.6		974.4	2050.6		993.4	1813.8		1728.4	1585.3		1914.9	1585.3
521.8	795.8	1960	1989.6	1960	1067.4	1989.6	1067.4	1677.2	1935.2	1937.5	1747.6	1777.1	1745.3	1658.4	1811.5		1195.7	1169.3	219	226.8	2686.9	2924	240.5	221.3	1263.4	1400.1	1364.5	1237.7	1343.6	836.3	897.4	840.6		795.8	1935.2		1067.4	1811.5		1195.7	1364.5		1265.1	1364.5
443.6	555.6	789.6	788	789.6	651.6	788	651.6	1498.2	1822.8	1684.4	1853.1	2023.3	1740.5	1636.8	1809.6		2197.6	2511.6	208.1	227	5652.2	4510.3	240.7	223.4	1673.1	1789	1924.9	1254.2	1960.7	834.7	968.9	839.9		555.6	1822.8		651.6	1809.6		2197.6	1924.9		5699	1924.9
788	1036.8	2026.8	2040.4	2026.8	1272.6	2040.4	1272.6	1567.4	1871.9	1694	1845.7	1464.7	1736.7	1850.9	1808.8		1297.3	1267.1	172.9	227.8	3395.1	1915.6	240.8	213.1	1169.9	1308.2	1194	997.9	1879.7	834.3	1180.7	836.3		1036.8	1871.9		1272.6	1808.8		1297.3	1194		1307	1194
877.5	1215.1	2097.2	2151.2	2097.2	1430.1	2151.2	1430.1	1444	1751.1	2116.5	1901	1911	1736.1	1693	1808.6		2931.6	2811.8	154.9	228.5	1348.7	1807.1	241.7	216.8	1499	1669.7	1308.5	1195.5	2070.3	832.8	1872.5	834.7		1215.1	1751.1		1430.1	1808.6		2931.6	1308.5		3119.4	1308.5
1489.6	1832.6	2140.6	2042.8	2140.6	1559.5	2042.8	1559.5	1569.8	1982.3	2250	2268.6	1751.4	1720.7	2051.2	1807.9		1929.5	1912.1	176	229	658	879	242.7	288.8	1769.3	1835.8	1806.4	1504.3	1884.3	832.5	1674.7	834.3		1832.6	1982.3		1559.5	1807.9		1929.5	1806.4		1767	1806.4
1383	1718.4	2020.4	1977.8	2020.4	1441.4	1977.8	1441.4	1620.9	1906.7	1152.8	1781.9	1501.7	1715.6	1903.6	1800.7		2192.6	2151.3	248.4	231	1030	1226.6	242.7	202.1	2236.5	2289.1	2234.7	1808	1323.5	830.8	1722.4	832.8		1718.4	1906.7		1441.4	1800.7		2192.6	2234.7		2139.9	2234.7
1090.6	1518.5	2036.2	2006.3	2036.2	1445.2	2006.3	1445.2	1595	1911.7	2114.8	1893.6	1697.1	1715.2	1829.5	1800.2		1178.6	1173.2	165.3	231.4	7120.2	3840.4	243	217.1	1143.9	1268.9	1174.7	1043	1444.1	829.9	1500.5	832.5		1518.5	1911.7		1445.2	1800.2		1178.6	1174.7		1118	1174.7
551.3	852	1988.4	2048.8	1988.4	1054.5	2048.8	1054.5	1766.9	2098.1	1816.1	1760.3	1645.9	1712.9	1756.3	1800.1		3095.5	2925.5	164.2	231.5	2074	2263.3	243.1	260.1	2914.4	3111	2594	2258.4	1188.2	828.6	1221	830.8		852	2098.1		1054.5	1800.1		3095.5	2594		2839.3	2594
502.3	909.3	2015.1	2129.5	2015.1	1361.3	2129.5	1361.3	1396.5	1659.3	2033.8	2076.2	870.2	1709.3	1738.2	1796.1		3690	3636.4	34	231.5	1755.4	1645.6	243.2	214.9	4389.7	4130.6	4035.8	3486.2	2113.2	826.6	1063	829.9		909.3	1659.3		1361.3	1796.1		3690	4035.8		3583.4	4035.8
944	1293.9	1777.4	1755.5	1777.4	1174.3	1755.5	1174.3	1569.6	1868.4	1442.6	1635.9	1546.6	1706.9	2005.4	1790.3		3096.7	3108.6	94.7	232.4	1860.2	2090.6	243.6	228.7	2226	2277	1948.9	1633.8	1867.8	825.6	1070.9	828.6		1293.9	1868.4		1174.3	1790.3		3096.7	1948.9		3033.3	1948.9
1140.2	1409.9	1629.2	1616.3	1629.2	1184.1	1616.3	1184.1	1518.9	1853.5	1777.1	1622	1541.6	1705.9	1852.8	1787.6		4960.3	5697.4	191.1	232.9	4331	3407.9	244.6	232.7	1559	1542.4	1502.7	1234	1027.5	825.4	1764.8	826.6		1409.9	1853.5		1184.1	1787.6		4960.3	1502.7		5136.5	1502.7
1462.4	1758.6	1828.3	1816.3	1828.3	1415.5	1816.3	1415.5	1540.3	1820.2	2023.3	1990.8	1719.6	1703.2	1747.6	1784.7		2333.6	3262.1	167.4	233.4	921.5	1228.4	245.9	208.8	895.2	915.8	1007.2	752.8	1166.3	818.2	1680.9	825.6		1758.6	1820.2		1415.5	1784.7		2333.6	1007.2		2798.3	1007.2
892.5	1138.6	1772.2	1756.8	1772.2	1224	1756.8	1224	1546.7	1817.1	1464.7	1547.6	1799.2	1701.3	1853.1	1781		1824	1728	272.9	235.2	2117.5	2041.5	245.9	77.6	1804.7	1898.3	1717.5	1467.4	1257.1	814.6	803.1	825.4		1138.6	1817.1		1224	1781		1824	1717.5		1885.9	1717.5
868.1	1149.1	1173.7	1200	1173.7	1151.1	1200	1151.1	1462.7	1875.5	1911	1825	3338.5	1701.1	1845.7	1775.5		872.9	839.8	33.3	235.2	994	1102.6	246	142.4	923	1077.3	1020.1	897.4	1958.2	813.5	1037.3	818.2		1149.1	1875.5		1151.1	1775.5		872.9	1020.1		1012.8	1020.1
1287	1632.1	1906.8	1855.2	1906.8	1341.9	1855.2	1341.9	1454.6	1762.1	1751.4	1750.3	1828.1	1700.1	1901	1770.7		1243.8	1188	231.1	235.2	1615.6	1937.2	246.8	174.5	1200	1325.3	1128.1	968.9	424.6	812	998.9	814.6		1632.1	1762.1		1341.9	1770.7		1243.8	1128.1		1286.3	1128.1
1434.2	1780.1	1726	1744.6	1726	1184.5	1744.6	1184.5	1588.3	1916.8	1501.7	1625.4	2145.5	1699.7	2268.6	1759.9		4104	6355.5	241.5	235.3	3413.1	2486.2	247.1	209.6	1585.5	1616.6	1343.6	1180.7	2080.4	809.9	1631	813.5		1780.1	1916.8		1184.5	1759.9		4104	1343.6		5022.8	1343.6
537.9	815.7	1899.6	1897	1899.6	1092.7	1897	1092.7	1524.4	1766.6	1697.1	1551.5	408.2	1695.3	1781.9	1755.3		2307.2	2227.6	270.8	236.6	1019.8	1043.8	247.2	241.5	2256.4	2427.6	1960.7	1872.5	1263.3	807.5	357	812		815.7	1766.6		1092.7	1755.3		2307.2	1960.7		2271	1960.7
1491.3	1699.5	1959.1	1908.4	1959.1	1397.6	1908.4	1397.6	1499.4	1811	1645.9	1707.8	1590.5	1692.9	1893.6	1754.4		1874	1925.7	207.4	239.6	4749	2790	247.8	183.6	2285.7	2410.3	1879.7	1674.7	2667.3	806.8	1817	809.9		1699.5	1811		1397.6	1754.4		1874	1879.7		2902.9	1879.7
1174.7	1534	1903.5	1820	1903.5	1327.5	1820	1327.5	1524.8	1843.8	870.2	1737.9	1837.5	1691.4	1760.3	1754.4		2233.5	2081.2	217.3	240	2666	2231.8	248.4	256.2	2263.4	2048.8	2070.3	1722.4	1934	805.3	1125	807.5		1534	1843.8		1327.5	1754.4		2233.5	2070.3		2025.1	2070.3
1122.2	1614.5	1861.1	1836.4	1861.1	1444	1836.4	1444	1438	1759.3	1546.6	1741.7	1772.7	1686.5	2076.2	1752.8		3779.3	4326.7	236.4	240.5	2546.3	2848.6	249.4	61.9	1957.6	2056.5	1884.3	1500.5	1571.6	802.2	2176	806.8		1614.5	1759.3		1444	1752.8		3779.3	1884.3		3764.9	1884.3
686.3	809.1	1002.5	1022.2	1002.5	918.2	1022.2	918.2	1445.9	1718.2	1541.6	1745	1763.1	1685.5	1635.9	1747.8		1197.1	1213.3	249.9	240.7	571.1	750	250.9	254.4	1248.1	1421.5	1323.5	1221	1796.6	801.5	1789.8	805.3		809.1	1718.2		918.2	1747.8		1197.1	1323.5		1393	1323.5
1227.8	1436.3	1708.7	1558.2	1708.7	1139.4	1558.2	1139.4	1428	1736.2	1719.6	1836.5	1811.1	1680.9	1622	1745.3		2555.5	2501.8	177.9	240.8	2345.8	2491.2	251.3	234.1	1512	1532	1444.1	1063	1543.8	799.4	1342.6	802.2		1436.3	1736.2		1139.4	1745.3		2555.5	1444.1		2655	1444.1
1716.9	2118.7	2306	2233.8	2306	1583.1	2233.8	1583.1	1484.7	1764.6	1799.2	1780.5	1060.8	1678.6	1990.8	1740.5		1124	1133.3	195.5	241.7	1504.9	1450.9	252.3	213.9	1251	1340.8	1188.2	1070.9	2850	793.2	1542.2	801.5		2118.7	1764.6		1583.1	1740.5		1124	1188.2		1106.4	1188.2
520	1018.8	2028.2	1893.6	2028.2	1255.8	1893.6	1255.8	1648.5	1938.4	3338.5	4376.4	1183.4	1674.7	1547.6	1736.7		2066.6	2009.1	284.8	242.7	1877.5	2131.4	252.5	180.4	2041.1	2103.8	2113.2	1764.8	1020	791.8	1293.6	799.4		1018.8	1938.4		1255.8	1736.7		2066.6	2113.2		2014.6	2113.2
1191.6	1556.6	2113.8	2009.5	2113.8	1444.6	2009.5	1444.6	1534.7	1852	1828.1	1663.4	1829.7	1673.7	1825	1736.1		3238.4	3559.2	192.5	242.7	1460.9	1731.3	252.7	223.3	2006	2131.2	1867.8	1680.9	3561.2	785.6	2256.7	793.2		1556.6	1852		1444.6	1736.1		3238.4	1867.8		3922.1	1867.8
1260.2	1647.8	1887.1	1881.9	1887.1	1294.9	1881.9	1294.9	1606.2	1962.5	2145.5	2016.3	1725.6	1673	1750.3	1720.7		1170.3	1149.8	251.8	243	1519.4	1599.9	253.9	67.9	877.6	938.5	1027.5	803.1	1690	785.4	745.2	791.8		1647.8	1962.5		1294.9	1720.7		1170.3	1027.5		1093.3	1027.5
431.8	1532.2	1907.1	1026.2	1907.1	1411	1026.2	1411	2860.6	3655.2	408.2	1403.1	1756.7	1669.9	1625.4	1715.6		3232.3	4633.1	243.4	243.1	1336.2	1708.2	259	259.6	1255.7	1392.2	1166.3	1037.3	2730	785.1	1891.1	785.6		1532.2	3655.2		1411	1715.6		3232.3	1166.3		3792.5	1166.3
1125.2	1377.2	1531.6	1513.2	1531.6	1144.1	1513.2	1144.1	1427.2	1836.3	1590.5	1654.3	1324.3	1662.7	1551.5	1715.2		2780	2597	196.6	243.2	1930.5	2180.4	261.1	68.1	1156.3	1223.8	1257.1	998.9	1323.5	783.3	1422.3	785.4		1377.2	1836.3		1144.1	1715.2		2780	1257.1		2392.8	1257.1
970.6	1270.1	1951.1	1948	1951.1	1270.2	1948	1270.2	1483.6	1765.8	1837.5	1788.4	1725.6	1660.2	1707.8	1712.9		2967	2988.1	172.3	243.6	2575.5	2869.2	261.2	76.7	2211.2	2415.9	1958.2	1631	1354.1	781.2	2352	785.1		1270.1	1765.8		1270.2	1712.9		2967	1958.2		2896.2	1958.2
416.9	589.2	1767.3	1710.8	1767.3	857	1710.8	857	1623.4	1931.4	1772.7	1696.9	1693.8	1658.7	1737.9	1709.3		1028.1	1392.1	253.9	244.6	1413.6	1257.6	262.5	253.5	477.1	596	424.6	357	1555.6	781	1130.2	783.3		589.2	1931.4		857	1709.3		1028.1	424.6		3325.7	424.6
996.9	1263.3	2011.9	2050.9	2011.9	1298.8	2050.9	1298.8	1601.7	1924.4	1763.1	1590.4	1828.2	1658.5	1741.7	1706.9		2551.3	2609.7	276.6	245.9	3164.9	3723.5	262.7	263.9	2342.2	2426.5	2080.4	1817	1435.1	780.6	1132.6	781.2		1263.3	1924.4		1298.8	1706.9		2551.3	2080.4		2453.6	2080.4
858.1	1125.7	1916.7	1940.4	1916.7	1304.8	1940.4	1304.8	1425.1	1617.9	1811.1	1802.8	910.2	1653.8	1745	1705.9		1802.7	1735.1	36	245.9	2308	2379.5	262.8	244.6	1358.1	1378.4	1263.3	1125	978.9	773.3	1367.2	781		1125.7	1617.9		1304.8	1705.9		1802.7	1263.3		1679.3	1263.3
720.5	1324.4	1952.5	1824.8	1952.5	1270.2	1824.8	1270.2	1528.5	1820.1	1060.8	1655.6	1336	1649	1836.5	1703.2		2244	2315.6	118.5	246	2194.6	2502.3	263.5	271.4	2659.3	2566.6	2667.3	2176	3359.1	771.1	1286.1	780.6		1324.4	1820.1		1270.2	1703.2		2244	2667.3		2271.2	2667.3
1241.1	1450.4	1793.8	1724.5	1793.8	1249.6	1724.5	1249.6	1471.5	1806.9	1183.4	1682.4	1127.3	1645.3	1780.5	1701.3		1811.7	1703.9	171.2	246.8	986.6	1374.2	263.6	250.9	1855.2	2108.7	1934	1789.8	1807.5	770.2	800.1	773.3		1450.4	1806.9		1249.6	1701.3		1811.7	1934		1877.2	1934
1544	837	3081.4	1371.2	3081.4	1638.9	1371.2	1638.9	5475.8	3367	1829.7	1768.4	1203.2	1639.6	4376.4	1701.1		1872.3	1764.5	181.8	247.1	906.7	1109.4	264.3	269.6	1815.2	1881.8	1571.6	1342.6	1299.2	768	2647.4	771.1		837	3367		1638.9	1701.1		1872.3	1571.6		1701.7	1571.6
1288.9	1495.6	1639.2	1619.3	1639.2	1263.2	1619.3	1263.2	1388.9	1698.4	1725.6	1872.6	1684.2	1639.1	1663.4	1700.1		1568.3	1616.5	202.5	247.2	1159.6	1363.3	264.6	256.4	1827.5	1796.2	1796.6	1542.2	1431.2	765	1417.2	770.2		1495.6	1698.4		1263.2	1700.1		1568.3	1796.6		1874.7	1796.6
1515.8	1875.1	2296.3	2053.9	2296.3	1567.4	2053.9	1567.4	1563.5	1885.2	1756.7	1802.7	1169.6	1637.1	2016.3	1699.7		2238.9	2300.8	159	247.8	1062	1170.1	265.3	241.9	1739.4	1797.3	1543.8	1293.6	1692.5	764.1	1179.5	768		1875.1	1885.2		1567.4	1699.7		2238.9	1543.8		2261.2	1543.8
150.3	229.5	1293.9	1320.6	1293.9	450.8	1320.6	450.8	1545.1	1822.7	1324.3	1614.5	1245.6	1625.1	1403.1	1695.3		2882.7	2943.2	229	248.4	1441.1	1232	266	254.5	2870.4	2583	2850	2256.7	989.6	760.4	1359.6	765		229.5	1822.7		450.8	1695.3		2882.7	2850		2719.2	2850
667.7	1081.4	1689.3	1718.6	1689.3	1203.2	1718.6	1203.2	1414.4	1724.2	1725.6	1546.4	988.3	1623.9	1654.3	1692.9		1543.5	1489.7	49.6	249.4	1743.1	2155.6	266.3	204	991.3	929.7	1020	745.2	1304.6	759.1	1527.6	764.1		1081.4	1724.2		1203.2	1692.9		1543.5	1020		1143.3	1020
1223.1	1539.8	1687	1675.7	1687	1268.8	1675.7	1268.8	1538.1	1811.2	1693.8	1753.2	1881.9	1615.8	1788.4	1691.4		5441.9	6456.1	201.9	250.9	1954.6	2075.5	266.4	245.5	3051	3219.6	3561.2	1891.1	1392.1	758.9	898.3	760.4		1539.8	1811.2		1268.8	1691.4		5441.9	3561.2		13424.3	3561.2
1331	1675.8	1931.7	1874.2	1931.7	1352	1874.2	1352	1502.6	1840.2	1828.2	1673.8	1696.5	1595.5	1696.9	1686.5		2566.2	2554.1	221.5	251.3	1253.3	1383.8	267	252.5	1946.5	2025.1	1690	1422.3	1903.5	758.9	1085.2	759.1		1675.8	1840.2		1352	1686.5		2566.2	1690		2416.3	1690
1300	1443.2	1829.2	1793.3	1829.2	1281.4	1793.3	1281.4	1462.8	1832.3	910.2	1503	1650.7	1594.9	1590.4	1685.5		2444.5	2539.6	211.5	252.3	1057.3	1320.5	267.6	258.7	2774.6	2817.7	2730	2352	1628.6	758.2	1461.6	758.9		1443.2	1832.3		1281.4	1685.5		2444.5	2730		2602.5	2730
1595.2	1845.7	2263.9	2140.5	2263.9	1545.8	2140.5	1545.8	1558.3	1870.1	1336	1719.9	1289.3	1592	1802.8	1680.9		1221	1238	262.6	252.5	1248.2	1499.6	268.6	248.1	1159	1310.9	1323.5	1130.2	966	755.8	1548.2	758.9		1845.7	1870.1		1545.8	1680.9		1221	1323.5		1892.1	1323.5
488.8	724.5	1772.8	1815.8	1772.8	1075	1815.8	1075	1315	1615.1	1127.3	1456.9	1775.5	1588.8	1655.6	1678.6		1137.4	1120.1	202.2	252.7	696.2	831.8	269.4	271.1	1309.8	1437	1354.1	1132.6	1731.4	754.6	1451.3	758.2		724.5	1615.1		1075	1678.6		1137.4	1354.1		1140.5	1354.1
617.5	946.1	2016.2	2001.6	2016.2	1227.3	2001.6	1227.3	1401.1	1666.2	1203.2	1501.8	1686.4	1584.8	1682.4	1674.7		1408.1	1454.6	55.9	253.9	3800	3028.9	269.7	285.9	1603.9	1725.5	1555.6	1367.2	1233.8	752.3	781.1	755.8		946.1	1666.2		1227.3	1674.7		1408.1	1555.6		1448.8	1555.6
1328.2	1657.1	1928.5	1837.7	1928.5	1335.8	1837.7	1335.8	1426.4	1734	1684.2	1708.3	1631.1	1584.3	1768.4	1673.7		1248.7	1224.3	243.7	259	1704.2	2751.8	269.8	197.1	1298.1	1446.7	1435.1	1286.1	937.1	751.8	1422.8	754.6		1657.1	1734		1335.8	1673.7		1248.7	1435.1		1406.9	1435.1
855.5	1225.1	1613.7	1533.3	1613.7	1339.6	1533.3	1339.6	1762.7	2104	1169.6	1625.1	1640.5	1581.4	1872.6	1673		1473.4	1516	82.2	261.1	1755.2	2032.7	271.1	287.3	972.7	1026	978.9	800.1	2704	750.6	1064.8	752.3		1225.1	2104		1339.6	1673		1473.4	978.9		1378	978.9
1212.7	1636.5	2006.4	1976.5	2006.4	1466	1976.5	1466	1469.3	1803.3	1245.6	1568.5	1392.8	1580.3	1802.7	1669.9		2220.1	2156.9	47.7	261.2	1527.2	1591.2	271.2	237.5	3456.8	3169.4	3359.1	2647.4	1159.2	750.2	770.3	751.8		1636.5	1803.3		1466	1669.9		2220.1	3359.1		2417.4	3359.1
807.8	1019.5	1715.9	1790.6	1715.9	1132.5	1790.6	1132.5	1375.5	1544.6	988.3	1647.6	1637.4	1568.4	1614.5	1662.7		2280.9	2338.3	254.5	262.5	1685	1605.1	271.5	188.9	1905.5	1813.7	1807.5	1417.2	1534.1	749.3	2528.4	750.6		1019.5	1544.6		1132.5	1662.7		2280.9	1807.5		2081.1	1807.5
1294.8	1442.1	1737.4	1708.1	1737.4	1245.4	1708.1	1245.4	1366.1	1678	1881.9	1712.2	1290.2	1556.6	1546.4	1660.2		1027.9	1238.2	252.2	262.7	2710.1	2920.8	272.3	271.3	1176.6	1242.3	1299.2	1179.5	1316.6	748.1	940.7	750.2		1442.1	1678		1245.4	1660.2		1027.9	1299.2		1617.4	1299.2
920	1118.6	1365.4	1347.6	1365.4	1076	1347.6	1076	1407.5	1732.8	1696.5	1627.5	1836.4	1553.4	1753.2	1658.7		1350.5	1247.7	243	262.8	2579.2	2466.2	272.9	182.4	1484.9	1551.3	1431.2	1359.6	2528.1	743.3	1377.2	749.3		1118.6	1732.8		1076	1658.7		1350.5	1431.2		2639	1431.2
939.4	1273.3	1534	1470.5	1534	1246.8	1470.5	1246.8	1551.7	1893.7	1650.7	1596.3	1218.1	1551.5	1673.8	1658.5		1631.8	1525.7	277	263.5	6056	4683.5	274.9	258.7	1749.1	1918.6	1692.5	1527.6	2478.5	742.2	1142.8	748.1		1273.3	1893.7		1246.8	1658.5		1631.8	1692.5		1622.8	1692.5
420.5	610.3	1773.2	1782.9	1773.2	979.8	1782.9	979.8	1395	1603.8	1289.3	1524	1727	1549.2	1503	1653.8		897.4	838.4	191	263.6	2274	2781.4	275.2	221	946.2	1095.2	989.6	898.3	1315.6	741.6	2194.5	743.3		610.3	1603.8		979.8	1653.8		897.4	989.6		837.8	989.6
601.5	759.2	1121.5	1113.2	1121.5	887.6	1113.2	887.6	1403.4	1769.2	1775.5	1711.5	1676.8	1548.5	1719.9	1649		3372.9	4092.2	317.5	264.3	2270.1	1839.7	275.6	242.6	1370.3	1455.8	1304.6	1085.2	1596.5	736.9	2258.6	742.2		759.2	1769.2		887.6	1649		3372.9	1304.6		3723.3	1304.6
466.4	676.8	1323.9	1394.8	1323.9	785.6	1394.8	785.6	1327.1	1608.6	1686.4	1674.3	1641.5	1546.8	1456.9	1645.3		951.1	1180.7	239.6	264.6	1997.4	2024.7	276	245.2	2589.4	9118.2	1392.1	1461.6	1393	728.2	1181.8	741.6		676.8	1608.6		785.6	1645.3		951.1	1392.1		3858.8	1392.1
820.3	983	1622.8	1639.1	1622.8	1088.5	1639.1	1088.5	1345.6	1646.2	1631.1	1672.8	1623.5	1541	1501.8	1639.6		2180.6	2107.7	244.6	265.3	4059	2748.2	276.5	256.6	2005.6	1947.9	1903.5	1548.2	836.5	728.2	1340.2	736.9		983	1646.2		1088.5	1639.6		2180.6	1903.5		1965.5	1903.5
1112.5	1314.7	1685.9	1687.4	1685.9	1194.1	1687.4	1194.1	1423.8	1716.7	1640.5	1582.9	1710.5	1533.4	1708.3	1639.1		1684.9	1663.5	253.6	266	1955.9	2420.2	276.5	263.7	1696.2	1933	1628.6	1451.3	2061.5	727.4	1178.4	728.2		1314.7	1716.7		1194.1	1639.1		1684.9	1628.6		1448.1	1628.6
680.7	998.4	1795.8	1866.5	1795.8	1171	1866.5	1171	1421.7	1618.4	1392.8	1684.6	1036.6	1530	1625.1	1637.1		1804	1821.5	198.6	266.3	2085.8	2897.1	277.1	244.2	1055.6	1132.8	966	781.1	3260	727.3	764.5	728.2		998.4	1618.4		1171	1637.1		1804	966		1754.8	966
620.7	860.5	1646.1	1655.8	1646.1	977.9	1655.8	977.9	1448.2	1786.4	1637.4	1681.1	448.1	1523.9	1568.5	1625.1		3230.2	3232.3	195.7	266.4	1055.3	1245.1	277.4	280	2029.8	2116	1731.4	1422.8	1403.7	726.9	995.9	727.4		860.5	1786.4		977.9	1625.1		3230.2	1731.4		3014.5	1731.4
250.7	467.7	1456.8	1522.6	1456.8	847.2	1522.6	847.2	1453.9	1667.1	1290.2	1561.5	1112.2	1523.8	1647.6	1623.9		2773.1	2765.7	248.8	267	1588.4	1864.2	277.5	219.6	1359.4	1477.4	1233.8	1064.8	1574.4	719.1	2485.2	727.3		467.7	1667.1		847.2	1623.9		2773.1	1233.8		2975.3	1233.8
1355.4	1633.6	1848.2	1782	1848.2	1306	1782	1306	1367.5	1697.4	1836.4	1699	1851.3	1522.1	1712.2	1615.8		4853.9	5531.5	223.5	267.6	1598.4	1827.8	278.1	317.8	845.2	843.7	937.1	770.3	4320.5	717.8	1090.4	726.9		1633.6	1697.4		1306	1615.8		4853.9	937.1		4356.2	937.1
1147.1	1380.1	1736.5	1701.5	1736.5	1239.6	1701.5	1239.6	1354.5	1626.8	1218.1	1612.7	1432.1	1521.5	1627.5	1595.5		2842.5	2657.2	200.9	268.6	1300.7	1175.4	280.3	258.2	2828.5	2942.5	2704	2528.4	1147.2	717.5	1420.8	719.1		1380.1	1626.8		1239.6	1595.5		2842.5	2704		2808.2	2704
1442.9	1801.2	1783.5	1755.7	1783.5	1297.3	1755.7	1297.3	1342.5	1592.5	1727	1665	1485.3	1520.1	1596.3	1594.9		2182.7	2560.5	303.9	269.4	1691.6	1885.9	280.5	283.7	1140.3	1262.3	1159.2	940.7	1989.4	717	3458.5	717.8		1801.2	1592.5		1297.3	1594.9		2182.7	1159.2		2280.1	1159.2
431.6	798	1189.1	956.8	1189.1	764.4	956.8	764.4	1937.5	2406.7	1676.8	1534.9	749.3	1519.7	1524	1592		2208.9	2190.6	270.1	269.7	4845.9	4712.6	280.8	240.3	1666.4	1776.4	1534.1	1377.2	1551.6	716.1	959.7	717.5		798	2406.7		764.4	1592		2208.9	1534.1		2068.6	1534.1
1313.2	1519.2	1977.7	1933	1977.7	1271.7	1933	1271.7	1419	1703.6	1641.5	1478.6	901.3	1518.2	1711.5	1588.8		3377.4	3913.9	153.1	269.8	3655.2	2201.5	282.4	285.8	1343	1439.4	1316.6	1142.8	1914.1	715.4	1618.8	717		1519.2	1703.6		1271.7	1588.8		3377.4	1316.6		3360.1	1316.6
1416.2	1615.4	1981	1971.7	1981	1373.6	1971.7	1373.6	1419.3	1748.9	1623.5	1506.8	1409.4	1514.4	1674.3	1584.8		2538.3	2390.9	283.2	271.1	4824.9	4462	283.3	277.1	2638.8	2619.3	2528.1	2194.5	818.6	712.6	1405.7	716.1		1615.4	1748.9		1373.6	1584.8		2538.3	2528.1		2510.5	2528.1
986	1417.7	1660.8	1485	1660.8	1267.7	1485	1267.7	1815.9	2234.4	1710.5	1592.9	653.5	1513.4	1672.8	1584.3		2633.1	2463.9	173.5	271.2	5991.5	6520.1	283.4	277.9	2645.9	2672.6	2478.5	2258.6	1771.3	711.1	1371.3	715.4		1417.7	2234.4		1267.7	1584.3		2633.1	2478.5		3678.4	2478.5
1197.9	1375.3	1465.9	1522.5	1465.9	1064.9	1522.5	1064.9	1400	1718.5	1036.6	1532.6	1295.9	1510.6	1582.9	1581.4		1277.1	1283.7	154.7	271.5	2963.6	2831.8	283.4	278.9	1350.2	1466.4	1315.6	1181.8	1225.3	710.6	732.2	712.6		1375.3	1718.5		1064.9	1581.4		1277.1	1315.6		1262.9	1315.6
1081	1289	2040.8	2053.5	2040.8	1333	2053.5	1333	1371.4	1662.8	448.1	1202.6	1068.2	1501.8	1684.6	1580.3		1908.3	1900.2	243.5	272.3	3242.2	3556.2	285.8	269.9	1672.2	1760.1	1596.5	1340.2	2875	707.4	1577.3	711.1		1289	1662.8		1333	1580.3		1908.3	1596.5		1751.1	1596.5
1212.9	1535	1898.9	1803.9	1898.9	1261.3	1803.9	1261.3	1487.2	1769.7	1112.2	1470.6	1132	1497	1681.1	1568.4		1858.8	1914.5	177.3	272.9	3609.7	3723.8	286	272.4	1369.2	1524.4	1393	1178.4	2428.6	704.1	1144.7	710.6		1535	1769.7		1261.3	1568.4		1858.8	1393		1986.1	1393
768.4	1099.1	1791	1807.5	1791	1194.6	1807.5	1194.6	1399.8	1715.2	1851.3	1952.9	345.9	1491.5	1561.5	1556.6		1346.7	1395.2	237.7	274.9	2866.5	3099.7	286.9	292.3	817.4	929.3	836.5	764.5	1840.7	703.3	2502.6	707.4		1099.1	1715.2		1194.6	1556.6		1346.7	836.5		1276.4	836.5
1272.2	1428	1725.6	1674.4	1725.6	1227.9	1674.4	1227.9	1343.2	1616.2	1432.1	1549.6	1307.5	1491.4	1699	1553.4		2763.7	3333.2	205.8	275.2	1513.7	1403	286.9	248.7	1935.2	1799.7	2061.5	995.9	1557.1	701	2023.4	704.1		1428	1616.2		1227.9	1553.4		2763.7	2061.5		6896.1	2061.5
636.4	962.3	1973.4	1916.5	1973.4	1133.9	1916.5	1133.9	1379.2	1656.7	1485.3	1555	1504.1	1490.9	1612.7	1551.5		4992.8	5202.5	310.9	275.6	1386	1767.6	287	284.5	3225.7	3146.8	3260	2485.2	716.6	700.2	1534.6	703.3		962.3	1656.7		1133.9	1551.5		4992.8	3260		4511.3	3260
1342.5	1522.5	1855.5	1851.1	1855.5	1285.2	1851.1	1285.2	1312.2	1555.6	749.3	1431.3	1368.4	1487.5	1665	1549.2		2825	3625.5	212.5	276	4414.5	4060.8	288.7	199.6	1263.5	1365.2	1403.7	1090.4	1128.9	699.2	1219.4	701		1522.5	1555.6		1285.2	1549.2		2825	1403.7		3180.3	1403.7
1136	1252.8	1489.9	1500.3	1489.9	1088.8	1500.3	1088.8	1251.8	1538.8	901.3	1603.9	1683.9	1485.3	1534.9	1548.5		4303.5	5142.4	210.6	276.5	2208.5	2723.2	288.7	249.6	1822.7	1953.2	1574.4	1420.8	1451.1	696.1	642.6	700.2		1252.8	1538.8		1088.8	1548.5		4303.5	1574.4		5882.1	1574.4
1307.8	1514	1658.5	1682.2	1658.5	1225.3	1682.2	1225.3	1282.8	1637.1	1409.4	1609.6	912.2	1474.9	1478.6	1546.8		6952.8	6585.2	286.7	276.5	1765.8	2177.8	289.4	284	5129.9	4798	4320.5	3458.5	992.3	695.7	937.7	699.2		1514	1637.1		1225.3	1546.8		6952.8	4320.5		5998.2	4320.5
1000.4	1130.1	1267.7	1274.9	1267.7	961.2	1274.9	961.2	1281.7	1583.5	653.5	1185.1	1695.9	1465.3	1506.8	1541		2981.6	3051	258.5	277.1	2432.4	2764.7	290.1	255.1	1099.9	1166.3	1147.2	959.7	1712	695.5	1175.5	696.1		1130.1	1583.5		961.2	1541		2981.6	1147.2		2761.6	1147.2
1101.8	1411.2	1706.2	1688	1706.2	1222.4	1688	1222.4	1328.6	1596.9	1295.9	1646.6	1526.3	1463.7	1592.9	1533.4		3689.2	3773.1	273.4	277.4	2049.7	1984.5	290.3	261.5	2381.2	2402.8	1989.4	1618.8	561.7	695.2	702.1	695.7		1411.2	1596.9		1222.4	1533.4		3689.2	1989.4		5542	1989.4
575	838.3	1516.2	1500	1516.2	994.9	1500	994.9	1292.4	1590.6	1068.2	1364.6	974	1462.2	1532.6	1530		3928	3936.9	203.6	277.5	825.5	884.1	290.6	297.9	1865.6	2138.6	1551.6	1405.7	965.3	693.2	1326.2	695.5		838.3	1590.6		994.9	1530		3928	1551.6		3563.6	1551.6
166.1	241.5	1030.1	1089.2	1030.1	418.1	1089.2	418.1	1346.4	1640.4	1132	1332.2	1483.3	1461.8	1202.6	1523.9		3542.7	3642.7	354.7	278.1	999.3	1179.1	290.7	276.1	2051	2001.3	1914.1	1371.3	1403.3	689.8	356.3	695.2		241.5	1640.4		418.1	1523.9		3542.7	1914.1		3911.8	1914.1
517.6	757.8	1483.6	1507.3	1483.6	873	1507.3	873	1386.7	1576.1	345.9	1355.7	1543	1455.5	1470.6	1523.8		1589.3	1560.3	207.7	280.3	3718.2	2818.4	291.3	262.3	1100	1150.5	818.6	732.2	1883.6	688.1	874	693.2		757.8	1576.1		873	1523.8		1589.3	818.6		1456.3	818.6
1263.1	1563.7	1837.3	1753.4	1837.3	1299.8	1753.4	1299.8	1398.3	1680.6	1307.5	1482.3	1579	1454.4	1952.9	1522.1		1951.5	1788.5	290	280.5	371.2	608.5	293.2	284.4	1903.4	2029.2	1771.3	1577.3	2135.1	687.1	1223.9	689.8		1563.7	1680.6		1299.8	1522.1		1951.5	1771.3		1772	1771.3
998.1	1338.9	1652.6	1652	1652.6	1271.1	1652	1271.1	1259	1494.8	1504.1	1426.1	693.3	1453.9	1549.6	1521.5		4061.9	4418.9	188.1	280.8	1235.6	1445.9	293.3	312.3	2069.2	1974.5	1225.3	1144.7	1093.8	685.4	1284.7	688.1		1338.9	1494.8		1271.1	1521.5		4061.9	1225.3		3743.2	1225.3
753	992.2	1361.8	1348.1	1361.8	998.8	1348.1	998.8	1261.5	1496.2	1368.4	1457.9	1549.8	1448.8	1555	1520.1		2753	2726.9	301.7	282.4	482.4	399.1	293.3	71.3	2908.4	3026	2875	2502.6	1791.4	684.4	1950.9	687.1		992.2	1496.2		998.8	1520.1		2753	2875		2765.5	2875
277	424.7	1351.1	1397.6	1351.1	716.5	1397.6	716.5	1328	1510.4	1683.9	1602.1	1064.3	1442	1431.3	1519.7		2219.3	2182.1	256.7	283.3	879.6	1048.1	294.2	279.8	2392.8	2467.2	2428.6	2023.4	2025.5	682.5	1007	685.4		424.7	1510.4		716.5	1519.7		2219.3	2428.6		2298.9	2428.6
400	646.6	1605.7	1701.7	1605.7	884	1701.7	884	1326	1603	912.2	1501.2	1507.5	1441.7	1603.9	1518.2		2884.3	2824.6	334.4	283.4	879.1	1178.8	294.7	211.2	2118.8	2261.8	1840.7	1534.6	1433.7	682.2	1541.9	684.4		646.6	1603		884	1518.2		2884.3	1840.7		2694.8	1840.7
533.1	695.5	1384.1	1369.8	1384.1	808.2	1369.8	808.2	1360.9	1656.6	1695.9	1551.6	636	1437.3	1609.6	1514.4		2203.2	2270.6	320.5	283.4	3650.9	2400.8	295.2	219.8	1441.3	1583.7	1557.1	1219.4	1370.2	681.4	1713.1	682.5		695.5	1656.6		808.2	1514.4		2203.2	1557.1		2159.9	1557.1
241.8	359.7	1236.4	1250.1	1236.4	569.6	1250.1	569.6	1303.8	1655	1526.3	1494	1401.6	1434.3	1185.1	1513.4		965.4	894.8	273.8	285.8	3585.7	3422.2	295.4	340	847.9	948.1	716.6	642.6	1056.2	679.7	1261.9	682.2		359.7	1655		569.6	1513.4		965.4	716.6		886.9	716.6
858	1048.9	1872.1	1823.5	1872.1	1186.9	1823.5	1186.9	1435.9	1638.5	974	1365.2	1511	1431	1646.6	1510.6		1236	1208.6	297.8	286	4137.3	4049.1	295.6	252.7	1126.1	1206.7	1128.9	937.7	139.4	678	1174.6	681.4		1048.9	1638.5		1186.9	1510.6		1236	1128.9		1203.3	1128.9
296.3	609.9	1042.2	859.7	1042.2	644.4	859.7	644.4	1722.4	2150.6	1483.3	1480.1	935.7	1426.2	1364.6	1501.8		2699.5	3915.5	236.4	286.9	2211	2271.3	295.9	273.8	1432.4	1534.8	1451.1	1175.5	1344.3	676.7	925.7	679.7		609.9	2150.6		644.4	1501.8		2699.5	1451.1		4309.6	1451.1
282	1152.5	1976	860.8	1976	1204.8	860.8	1204.8	4262.4	5486.8	1543	1516.6	1177.5	1426.1	1332.2	1497		894.6	811.5	217.2	286.9	3005.5	3224.7	296.5	281.7	1007.3	1136.5	992.3	702.1	2667.7	676.6	72.3	678		1152.5	5486.8		1204.8	1497		894.6	992.3		3440	992.3
121	143	1199.1	1137.4	1199.1	379.3	1137.4	379.3	1354.7	1643.8	1579	1536.8	1586	1425.2	1355.7	1491.5		1583	1556.2	201.8	287	1000	1234.3	297.4	265.9	1723.2	1745	1712	1326.2	926.4	674.8	1171.4	676.7		143	1643.8		379.3	1491.5		1583	1712		1736.1	1712
584.7	956.6	1674.5	1610.4	1674.5	1094.7	1610.4	1094.7	1283.1	1515.2	693.3	1398.8	710.3	1422.8	1482.3	1491.4		498.1	683.3	164.3	288.7	1432.1	1516.9	298.2	187.9	436.9	347.5	561.7	356.3	1222.2	674.7	2051.3	676.6		956.6	1515.2		1094.7	1491.4		498.1	561.7		3053.2	561.7
1209.1	1482.3	1741.5	1740.2	1741.5	1243.6	1740.2	1243.6	1370.1	1670.1	1549.8	1501.3	1254	1421.7	1426.1	1490.9		1071.6	1048	206.5	288.7	4236.2	3921.7	298.5	255.7	969.7	1075.7	965.3	874	1046.7	669.5	748.9	674.8		1482.3	1670.1		1243.6	1490.9		1071.6	965.3		1049.6	965.3
689	850.7	1260	1207.7	1260	885.3	1207.7	885.3	1259.5	1492.3	1064.3	1421	1395	1417.5	1457.9	1487.5		1071.1	1002.6	246.2	289.4	112.4	98.7	298.7	294.2	1288.4	1401.6	1403.3	1223.9	2204.6	669.4	1221.2	674.7		850.7	1492.3		885.3	1487.5		1071.1	1403.3		1562.7	1403.3
1165.3	1347.7	1742.8	1690.3	1742.8	1192	1690.3	1192	1276.8	1560.5	1507.5	1496.6	847.6	1416.3	1602.1	1485.3		2417.9	3765.2	242.9	290.1	1132.1	1317	299.2	257.5	1600.2	1483.9	1883.6	1284.7	2562.5	667.8	883.6	669.5		1347.7	1560.5		1192	1485.3		2417.9	1883.6		4201.2	1883.6
626	799.2	1779.6	1749	1779.6	918.5	1749	918.5	1301.1	1553	636	957	1668.4	1413.5	1501.2	1474.9		3496	3724	362.4	290.3	2486.7	2663.5	299.3	232.8	2531.2	2693.3	2135.1	1950.9	1520.7	666.4	2069.8	669.4		799.2	1553		918.5	1474.9		3496	2135.1		3754.3	2135.1
1188.9	1412.7	1625.3	1586.7	1625.3	1162	1586.7	1162	1284.2	1542.5	1401.6	1339.2	1468.5	1411.6	1551.6	1465.3		4308.1	4140.9	308.4	290.6	2569.2	2319.4	299.4	353.1	1569.6	1755.2	1093.8	1007	831.2	666.3	2174.7	667.8		1412.7	1542.5		1162	1465.3		4308.1	1093.8		3834.9	1093.8
1093.2	1494.3	1843.5	1814.2	1843.5	1345.9	1814.2	1345.9	1281.4	1560	1511	1357.2	1437.4	1408.7	1494	1463.7		2365.5	2384.1	236	290.7	2865.9	2541.8	299.4	300.2	1976.9	2046.1	1791.4	1541.9	1370.5	666.1	1329.5	666.4		1494.3	1560		1345.9	1463.7		2365.5	1791.4		2107.5	1791.4
200.4	522.5	1047.3	855.1	1047.3	640.6	855.1	640.6	1942.1	2461	935.7	1477.3	818.2	1406.5	1365.2	1462.2		3437.4	3387.7	228.6	291.3	2055.2	1924	299.5	314.3	2603.7	2543.4	2025.5	1713.1	1206.8	664.6	777.1	666.3		522.5	2461		640.6	1462.2		3437.4	2025.5		3160.5	2025.5
1258.1	1461.8	1738.6	1758.8	1738.6	1251.9	1758.8	1251.9	1257.3	1503	1177.5	1302.9	1681.4	1406.1	1480.1	1461.8		1203	1217.8	227.1	293.2	1602.3	2025.6	299.8	249.8	1361.7	1370.3	1433.7	1261.9	1844.4	664.2	1133.5	666.1		1461.8	1503		1251.9	1461.8		1203	1433.7		1338.3	1433.7
1129.3	1384.1	1548.7	1593.4	1548.7	1179.4	1593.4	1179.4	1521.2	1789	1586	1515.7	1439.1	1398.6	1516.6	1455.5		1632.2	1647.2	287.1	293.3	2038.6	2569.1	301	216.9	1374	1453.3	1370.2	1174.6	1172.3	663.3	1010.1	664.6		1384.1	1789		1179.4	1455.5		1632.2	1370.2		1518.2	1370.2
876.5	1109.5	1335.6	1298.5	1335.6	982	1298.5	982	1231.2	1515	710.3	1380.6	1398.2	1394.6	1536.8	1454.4		4217.9	4423.6	62.3	293.3	1447.1	1731.8	301.4	255.8	1166	1213.3	1056.2	925.7	1509.3	663.2	1501.8	664.2		1109.5	1515		982	1454.4		4217.9	1056.2		4131.2	1056.2
245.6	381.5	1384.4	1384	1384.4	647	1384	647	1295.3	1453.6	1254	1348.7	651.6	1394.6	1398.8	1453.9		135.8	133.8	276.8	294.2	799.9	931.5	301.6	296.3	63.9	74.5	139.4	72.3	1116.3	663.1	954.5	663.3		381.5	1453.6		647	1453.9		135.8	139.4		148.6	139.4
1084.4	1285.2	1611.3	1595.8	1611.3	1097.6	1595.8	1097.6	1249.1	1524.9	1395	1334.7	928.8	1393.4	1501.3	1448.8		1414.8	1374.9	197.9	294.7	3944.6	3130	301.9	262.2	1414	1555.4	1344.3	1171.4	944.7	662.8	1290.8	663.2		1285.2	1524.9		1097.6	1448.8		1414.8	1344.3		1339.8	1344.3
663.1	876.8	1652.1	1624	1652.1	1020.4	1624	1020.4	1242.5	1445.2	847.6	1437.9	1760.4	1390.8	1421	1442		2868.8	2892.9	239.9	295.2	1606.2	1507.4	302.9	165.1	2608	2539.8	2667.7	2051.3	1660.8	662.2	909.1	663.1		876.8	1445.2		1020.4	1442		2868.8	2667.7		2623.9	2667.7
867.8	1068.1	1208.5	1140.9	1208.5	1022.2	1140.9	1022.2	1222.8	1454.1	1668.4	1566.9	1459.3	1390.6	1496.6	1441.7		2551.1	2562.4	308.2	295.4	1323.3	1546.1	304.5	325.4	946.2	972.4	926.4	748.9	1028.2	660.5	843	662.8		1068.1	1454.1		1022.2	1441.7		2551.1	926.4		2404	926.4
247.7	457.1	1553.2	1571.1	1553.2	783.6	1571.1	783.6	1186.8	1493.8	1468.5	1433.3	1581.9	1389.6	957	1437.3		2854.6	2733.7	198.4	295.6	1044.6	1299.8	305.6	280.9	1408.7	1565	1222.2	1221.2	2569.1	660.4	1466.1	662.2		457.1	1493.8		783.6	1437.3		2854.6	1222.2		2598.6	1222.2
746.9	996.7	1312	1358.5	1312	975.2	1358.5	975.2	1168.7	1458.1	1437.4	1401.8	1370	1388.8	1339.2	1434.3		2370.4	2214	251.7	295.9	1570.2	1856.7	305.7	315.1	1022.8	1084.3	1046.7	883.6	1964.3	659.8	842.1	660.5		996.7	1458.1		975.2	1434.3		2370.4	1046.7		2145.3	1046.7
833.5	911.8	1135.1	1105.6	1135.1	918.7	1105.6	918.7	1177	1388.5	818.2	1370.5	952.6	1388	1357.2	1431		1952.1	1852	298.3	296.5	726.3	834.8	306.1	238.7	2065.5	2183.6	2204.6	2069.8	3210.9	659.7	2059.3	660.4		911.8	1388.5		918.7	1431		1952.1	2204.6		2505.1	2204.6
369	540.5	1541.3	1568.7	1541.3	926.5	1568.7	926.5	1143.8	1387.4	1681.4	1500.6	1209.5	1383.5	1477.3	1426.2		2573	2441.8	265.9	297.4	764.5	898.9	306.9	106.3	2489.2	2491.9	2562.5	2174.7	3594.3	659.5	1912.2	659.8		540.5	1387.4		926.5	1426.2		2573	2562.5		2969.8	2562.5
557.3	649.1	1053.3	1028.1	1053.3	677.9	1028.1	677.9	1155.5	1389.8	1439.1	1418.2	1439.6	1383.5	1302.9	1426.1		1815.5	1728.8	196.6	298.2	1555.5	1781.5	308.6	324.2	1668	1710.9	1520.7	1329.5	3224.2	656	2514.7	659.7		649.1	1389.8		677.9	1426.1		1815.5	1520.7		1812.8	1520.7
802.1	1122.8	1317.5	1244.3	1317.5	905.7	1244.3	905.7	1207.2	1466	1398.2	1508.3	1305.8	1383.5	1515.7	1425.2		997.3	957	173.7	298.5	705.1	889.9	310	316.5	921.4	1042.9	831.2	777.1	841.9	656	3189.7	659.5		1122.8	1466		905.7	1425.2		997.3	831.2		961	831.2
359.6	481.1	1406.1	1391.3	1406.1	765.7	1391.3	765.7	1257.3	1481.7	651.6	1309.8	1023.3	1374.4	1380.6	1422.8		3599.8	3890.5	286.2	298.7	2656.5	2647.9	310.3	287.8	1472.8	1532	1370.5	1133.5	935	655.8	2718.8	656		481.1	1481.7		765.7	1422.8		3599.8	1370.5		3693.3	1370.5
880.6	1080.7	1471.5	1516.9	1471.5	1015.6	1516.9	1015.6	1141	1379.9	928.8	1335.9	894.6	1374.1	1348.7	1421.7		1487.1	1666.3	220.7	299.2	4811	4631.6	312.1	337.4	1180.3	1241.2	1206.8	1010.1	352.9	655.2	609.2	656		1080.7	1379.9		1015.6	1421.7		1487.1	1206.8		1379	1206.8
1074.1	1376.8	1650	1657.3	1650	1188.6	1657.3	1188.6	1206.1	1484.5	1760.4	1661.5	1459.7	1373	1334.7	1417.5		1581.2	1581.9	165.4	299.3	3452	3480	312.2	269.2	1864.4	1817.9	1844.4	1501.8	1863.8	654.1	842	655.8		1376.8	1484.5		1188.6	1417.5		1581.2	1844.4		1658.4	1844.4
335.1	516	1533.1	1515.3	1533.1	748.1	1515.3	748.1	1230.4	1508.1	1459.3	1385.7	1498.5	1371.4	1437.9	1416.3		1267.1	1306.7	352	299.4	4261.1	4162.4	312.6	276.5	1199.3	1224.7	1172.3	954.5	1973	651.7	175	655.2		516	1508.1		748.1	1416.3		1267.1	1172.3		1392.8	1172.3
1224.8	1465.5	1762.7	1709.7	1762.7	1193.5	1709.7	1193.5	1296.7	1502.8	1581.9	1593.7	627.9	1361.8	1566.9	1413.5		1951.1	1750.1	243.3	299.4	2308.2	2385	314.1	284.9	1654.9	1884	1509.3	1290.8	1673.6	650.2	1644.4	654.1		1465.5	1502.8		1193.5	1413.5		1951.1	1509.3		1736.5	1509.3
792.8	1065.6	1198.4	1199.7	1198.4	997.9	1199.7	997.9	1177.7	1446.8	1370	1521.6	966	1361.4	1433.3	1411.6		843.6	882.1	256.8	299.5	19.3	32.6	314.2	284.9	992.2	968.9	1116.3	909.1	1095.5	650.1	1902.5	651.7		1065.6	1446.8		997.9	1411.6		843.6	1116.3		909.3	1116.3
848.6	962.7	1408.4	1394.5	1408.4	946.7	1394.5	946.7	1217.8	1415	952.6	1351.8	1493.6	1360.5	1401.8	1408.7		993.6	939.8	227.2	299.8	2066	2232.9	314.2	304.5	968.9	1071.9	944.7	843	3251.4	649.5	1537.2	650.2		962.7	1415		946.7	1408.7		993.6	944.7		919.8	944.7
322.3	573.5	1541.5	1455.9	1541.5	760.9	1455.9	760.9	1435.5	1701.7	1209.5	1382	1442.8	1357.8	1370.5	1406.5		1901.3	1840.7	222.7	301	334.4	277.9	314.5	148.8	1789.5	1850.4	1660.8	1466.1	1778.7	645.7	908	650.1		573.5	1701.7		760.9	1406.5		1901.3	1660.8		1851.7	1660.8
1014.4	1309.3	1458.4	1354.7	1458.4	1039.7	1354.7	1039.7	1232.3	1505.9	1439.6	1347.2	1218.6	1347.6	1500.6	1406.1		964.4	914.7	248.8	301.4	1787.2	1987.6	317	341.6	1069	1130.6	1028.2	842.1	1018.5	645	1509.2	649.5		1309.3	1505.9		1039.7	1406.1		964.4	1028.2		958.4	1028.2
1024	1199.6	1494	1429.5	1494	1100.5	1429.5	1100.5	1193.5	1445.4	1305.8	1206.9	1269.6	1345.1	1418.2	1398.6		2774.4	2779.3	254.9	301.6	4786.7	4601.6	317.2	248	2454.5	2282.1	2569.1	2059.3	1108.2	644.9	1229.3	645.7		1199.6	1445.4		1100.5	1398.6		2774.4	2569.1		2660	2569.1
849.9	1151.2	1527.7	1513.9	1527.7	1057.4	1513.9	1057.4	1191.1	1452.8	1023.3	1333.4	522.9	1340.8	1508.3	1394.6		4415.1	4973.4	206.7	301.9	1657.7	1649.3	317.9	31.9	2351.7	2588.4	1964.3	1912.2	1068.8	643.4	851.6	645		1151.2	1452.8		1057.4	1394.6		4415.1	1964.3		5817.7	1964.3
262.2	478.8	1746.6	1420.9	1746.6	671.3	1420.9	671.3	1744.7	2190.1	894.6	1342.3	1280.1	1338.2	1309.8	1394.6		3873.1	3866.1	151.3	302.9	1011.4	1013.8	318.6	319.2	3313.4	3255.5	3210.9	2514.7	1509.9	631.9	979.7	644.9		478.8	2190.1		671.3	1394.6		3873.1	3210.9		3469.9	3210.9
381.7	557.9	1233.7	1207.9	1233.7	726.7	1207.9	726.7	1294.5	1535.5	1459.7	1304.9	1372.2	1335.6	1335.9	1393.4		4894.1	4894.4	287.3	304.5	1551.4	2099.8	319.5	129.6	4149.5	4333.2	3594.3	3189.7	2304.6	631.4	878.9	643.4		557.9	1535.5		726.7	1393.4		4894.1	3594.3		5739.3	3594.3
742.6	1101.5	1321.9	1131.5	1321.9	883.6	1131.5	883.6	1395.6	1769	1498.5	1308.7	1449	1327.6	1661.5	1390.8		1997.9	2631.8	308.5	305.6	4956.1	4498.8	320	317.5	2889.1	2950.1	3224.2	2718.8	1353.4	630.9	1316.3	631.9		1101.5	1769		883.6	1390.8		1997.9	3224.2		3678.4	3224.2
911.7	1136.9	1489.7	1415.7	1489.7	997	1415.7	997	1204.8	1453.8	627.9	1153.3	1403	1325.5	1385.7	1390.6		64.5	36.3	268.6	305.7	1268.1	1183.1	320.2	249.6	528.1	604	841.9	609.2	949.9	630.6	1902.8	631.4		1136.9	1453.8		997	1390.6		64.5	841.9		22.9	841.9
965.7	1178.1	1566	1506.3	1566	1132.3	1506.3	1132.3	1204.7	1501.5	966	1333.4	1619.1	1325.1	1593.7	1389.6		2227.3	2383.1	330.3	306.1	1855.3	2040.2	320.3	322.1	1212	1322.3	935	842	981.7	629.8	1259	630.9		1178.1	1501.5		1132.3	1389.6		2227.3	935		2176	935
677.9	990.1	1282.9	1328.4	1282.9	994.2	1328.4	994.2	1034.2	1293.8	1493.6	1434.9	1160.5	1323.1	1521.6	1388.8		331.5	326.9	91.8	306.9	961.5	1069.5	320.8	321.7	161.7	159	352.9	175	1591.5	626.8	872.3	630.6		990.1	1293.8		994.2	1388.8		331.5	352.9		283.4	352.9
274.1	381.8	794.1	840	794.1	478.4	840	478.4	1170.2	1438.2	1442.8	1464.3	526.9	1321.6	1351.8	1388		2038.1	2123.2	311.1	308.6	1116.1	1452.4	321	318.5	1910	2033.5	1863.8	1644.4	1158.9	626	780.8	629.8		381.8	1438.2		478.4	1388		2038.1	1863.8		1976.4	1863.8
[truncated: 2,092 more rows]
