# Supplementary material for: A cryptic K48 ubiquitin chain binding site on UCH37 is required for its role in proteasomal degradation
Source: eLife. 2022 Apr 22;11:e76100. doi: 10.7554/eLife.76100 (PMC9033301; doi:10.7554/eLife.76100)
Supplement: Figure 2—source data 1. [file elife-76100-fig2-data1.xlsx]

## Sheet: UCH37 C88A-DEUBAD
Protein	Start	End	Sequence	MaxUptake	MHP	State	Exposure Time (min)	Center	Center SD	Uptake	Uptake SD	RT	RT SD
UCHL5_HUMAN	11	18	MESDPGVF	6	881.371	UCH37C88A_DEUBAD	0	881.925	0.023897	0	0	6.26392	0.053771
UCHL5_HUMAN	11	18	MESDPGVF	6	881.371	UCH37C88A_DEUBAD	1	882.936	0.167501	1.01058	0.169197	6.26694	0.026515
UCHL5_HUMAN	11	18	MESDPGVF	6	881.371	UCH37C88A_DEUBAD	10	883.261	0.06856	1.33593	0.072605	6.26751	0.023126
UCHL5_HUMAN	11	18	MESDPGVF	6	881.371	UCH37C88A_DEUBAD	30	883.364	0.047758	1.43857	0.053403	6.26142	0.018232
UCHL5_HUMAN	11	18	MESDPGVF	6	881.371	UCH37C88A_DEUBAD	60	883.416	0.05791	1.49099	0.062647	6.26797	0.018259
UCHL5_HUMAN	11	18	MESDPGVF	6	881.371	UCH37C88A_DEUBAD	120	883.473	0	1.54796	0.023897	6.25359	0
UCHL5_HUMAN	11	18	MESDPGVF	6	881.371	UCH37C88A_DEUBAD_K48 Ub2	0	881.925	0.023897	0	0	6.26392	0.053771
UCHL5_HUMAN	11	18	MESDPGVF	6	881.371	UCH37C88A_DEUBAD_K48 Ub2	1	882.245	0.058225	0.319409	0.062938	6.2621	0.014101
UCHL5_HUMAN	11	18	MESDPGVF	6	881.371	UCH37C88A_DEUBAD_K48 Ub2	10	882.313	0.073777	0.387829	0.077551	6.25143	0.0225
UCHL5_HUMAN	11	18	MESDPGVF	6	881.371	UCH37C88A_DEUBAD_K48 Ub2	30	882.404	0.100615	0.479301	0.103414	6.24719	0.028351
UCHL5_HUMAN	11	18	MESDPGVF	6	881.371	UCH37C88A_DEUBAD_K48 Ub2	60	882.603	0.037311	0.678002	0.044308	6.24118	0.011987
UCHL5_HUMAN	11	18	MESDPGVF	6	881.371	UCH37C88A_DEUBAD_K48 Ub2	120	882.528	0.007254	0.602887	0.024973	6.23518	0.01428
UCHL5_HUMAN	11	18	MESDPGVF	6	881.371	UCH37C88A_DEUBAD_K48 Ub3	0	881.925	0.023897	0	0	6.26392	0.053771
UCHL5_HUMAN	11	18	MESDPGVF	6	881.371	UCH37C88A_DEUBAD_K48 Ub3	1	882.425	0.072729	0.499536	0.076554	6.26707	0.016732
UCHL5_HUMAN	11	18	MESDPGVF	6	881.371	UCH37C88A_DEUBAD_K48 Ub3	10	882.526	0.122636	0.601295	0.124943	6.26924	0.012053
UCHL5_HUMAN	11	18	MESDPGVF	6	881.371	UCH37C88A_DEUBAD_K48 Ub3	30	882.489	0.064215	0.564032	0.068518	6.26771	0.009772
UCHL5_HUMAN	11	18	MESDPGVF	6	881.371	UCH37C88A_DEUBAD_K48 Ub3	60	882.566	0.103674	0.641114	0.106392	6.26658	0.009703
UCHL5_HUMAN	11	18	MESDPGVF	6	881.371	UCH37C88A_DEUBAD_K48 Ub3	120	882.738	0.144387	0.812717	0.146351	6.26582	0.014283
UCHL5_HUMAN	11	18	MESDPGVF	6	881.371	UCH37C88A_DEUBAD_K6/48 Ub3	0	881.925	0.023897	0	0	6.26392	0.053771
UCHL5_HUMAN	11	18	MESDPGVF	6	881.371	UCH37C88A_DEUBAD_K6/48 Ub3	1	882.441	0.013415	0.515871	0.027405	6.28086	0.009158
UCHL5_HUMAN	11	18	MESDPGVF	6	881.371	UCH37C88A_DEUBAD_K6/48 Ub3	10	882.657	0.045887	0.7322	0.051737	6.24775	0.005668
UCHL5_HUMAN	11	18	MESDPGVF	6	881.371	UCH37C88A_DEUBAD_K6/48 Ub3	30	882.774	0.043748	0.849309	0.049849	6.2523	0.004245
UCHL5_HUMAN	11	18	MESDPGVF	6	881.371	UCH37C88A_DEUBAD_K6/48 Ub3	60	883.045	0.100542	1.1196	0.103342	6.26631	0.018759
UCHL5_HUMAN	11	18	MESDPGVF	6	881.371	UCH37C88A_DEUBAD_K6/48 Ub3	120	883.27	0.08551	1.34471	0.088786	6.2556	0.003151
UCHL5_HUMAN	11	18	MESDPGVF	6	881.371	UCH37C88A_DEUBAD_Ub	0	881.925	0.023897	0	0	6.26392	0.053771
UCHL5_HUMAN	11	18	MESDPGVF	6	881.371	UCH37C88A_DEUBAD_Ub	1	882.497	0.032719	0.571704	0.040517	6.13472	0.100606
UCHL5_HUMAN	11	18	MESDPGVF	6	881.371	UCH37C88A_DEUBAD_Ub	10	882.656	0.125203	0.730714	0.127463	6.12089	0.104233
UCHL5_HUMAN	11	18	MESDPGVF	6	881.371	UCH37C88A_DEUBAD_Ub	30	882.922	0.123441	0.99686	0.125733	6.13094	0.110682
UCHL5_HUMAN	11	18	MESDPGVF	6	881.371	UCH37C88A_DEUBAD_Ub	60	883.085	0.121194	1.16001	0.123527	6.15722	0.112714
UCHL5_HUMAN	11	18	MESDPGVF	6	881.371	UCH37C88A_DEUBAD_Ub	120	883.321	0	1.39601	0.023897	6.06974	0
UCHL5_HUMAN	19	31	TELIKGFGCRGAQ	12	1379.71	UCH37C88A_DEUBAD	0	1380.55	0.056442	0	0	5.2991	0.043951
UCHL5_HUMAN	19	31	TELIKGFGCRGAQ	12	1379.71	UCH37C88A_DEUBAD	1	1381.77	0.029467	1.22028	0.063671	5.28229	0.000685
UCHL5_HUMAN	19	31	TELIKGFGCRGAQ	12	1379.71	UCH37C88A_DEUBAD	10	1382.17	0.090164	1.61673	0.106373	5.30959	0.019557
UCHL5_HUMAN	19	31	TELIKGFGCRGAQ	12	1379.71	UCH37C88A_DEUBAD	30	1382.77	0.113729	2.21789	0.126964	5.29821	0.01404
UCHL5_HUMAN	19	31	TELIKGFGCRGAQ	12	1379.71	UCH37C88A_DEUBAD	60	1383.24	0.148844	2.68271	0.159186	5.30602	0.013767
UCHL5_HUMAN	19	31	TELIKGFGCRGAQ	12	1379.71	UCH37C88A_DEUBAD	120	1383.52	0.011698	2.96943	0.057641	5.30009	0.004461
UCHL5_HUMAN	19	31	TELIKGFGCRGAQ	12	1379.71	UCH37C88A_DEUBAD_K48 Ub2	0	1380.55	0.056442	0	0	5.2991	0.043951
UCHL5_HUMAN	19	31	TELIKGFGCRGAQ	12	1379.71	UCH37C88A_DEUBAD_K48 Ub2	1	1381.88	0.032005	1.32561	0.064884	5.29478	0.011522
UCHL5_HUMAN	19	31	TELIKGFGCRGAQ	12	1379.71	UCH37C88A_DEUBAD_K48 Ub2	10	1382.45	0.056348	1.90109	0.079754	5.2864	0.019664
UCHL5_HUMAN	19	31	TELIKGFGCRGAQ	12	1379.71	UCH37C88A_DEUBAD_K48 Ub2	30	1383.12	0.217709	2.57232	0.224906	5.28113	0.027408
UCHL5_HUMAN	19	31	TELIKGFGCRGAQ	12	1379.71	UCH37C88A_DEUBAD_K48 Ub2	60	1383.45	0.078338	2.8939	0.096553	5.28559	0.020146
UCHL5_HUMAN	19	31	TELIKGFGCRGAQ	12	1379.71	UCH37C88A_DEUBAD_K48 Ub2	120	1383.34	0.011558	2.78647	0.057613	5.27386	0.012425
UCHL5_HUMAN	19	31	TELIKGFGCRGAQ	12	1379.71	UCH37C88A_DEUBAD_K48 Ub3	0	1380.55	0.056442	0	0	5.2991	0.043951
UCHL5_HUMAN	19	31	TELIKGFGCRGAQ	12	1379.71	UCH37C88A_DEUBAD_K48 Ub3	1	1381.99	0.059388	1.43624	0.08193	5.29381	0.016241
UCHL5_HUMAN	19	31	TELIKGFGCRGAQ	12	1379.71	UCH37C88A_DEUBAD_K48 Ub3	10	1382.59	0.126363	2.03337	0.138395	5.30131	0.010383
UCHL5_HUMAN	19	31	TELIKGFGCRGAQ	12	1379.71	UCH37C88A_DEUBAD_K48 Ub3	30	1383.05	0.098763	2.5012	0.113753	5.29721	0.010796
UCHL5_HUMAN	19	31	TELIKGFGCRGAQ	12	1379.71	UCH37C88A_DEUBAD_K48 Ub3	60	1383.32	0.174469	2.76597	0.183371	5.29433	0.011268
UCHL5_HUMAN	19	31	TELIKGFGCRGAQ	12	1379.71	UCH37C88A_DEUBAD_K48 Ub3	120	1383.64	0.277127	3.08871	0.282816	5.28948	0.012178
UCHL5_HUMAN	19	31	TELIKGFGCRGAQ	12	1379.71	UCH37C88A_DEUBAD_K6/48 Ub3	0	1380.55	0.056442	0	0	5.2991	0.043951
UCHL5_HUMAN	19	31	TELIKGFGCRGAQ	12	1379.71	UCH37C88A_DEUBAD_K6/48 Ub3	1	1382.06	0.135718	1.51145	0.146987	5.30234	0.009292
UCHL5_HUMAN	19	31	TELIKGFGCRGAQ	12	1379.71	UCH37C88A_DEUBAD_K6/48 Ub3	10	1382.88	0.344924	2.32504	0.349512	5.28342	0.013428
UCHL5_HUMAN	19	31	TELIKGFGCRGAQ	12	1379.71	UCH37C88A_DEUBAD_K6/48 Ub3	30	1383.35	0.246151	2.79472	0.252539	5.2803	0.00543
UCHL5_HUMAN	19	31	TELIKGFGCRGAQ	12	1379.71	UCH37C88A_DEUBAD_K6/48 Ub3	60	1383.64	0.317899	3.0876	0.322871	5.29778	0.01533
UCHL5_HUMAN	19	31	TELIKGFGCRGAQ	12	1379.71	UCH37C88A_DEUBAD_K6/48 Ub3	120	1384.32	0.160382	3.77227	0.170024	5.28575	0.002871
UCHL5_HUMAN	19	31	TELIKGFGCRGAQ	12	1379.71	UCH37C88A_DEUBAD_Ub	0	1380.55	0.056442	0	0	5.2991	0.043951
UCHL5_HUMAN	19	31	TELIKGFGCRGAQ	12	1379.71	UCH37C88A_DEUBAD_Ub	1	1381.76	0.046026	1.20897	0.072829	5.2139	0.005924
UCHL5_HUMAN	19	31	TELIKGFGCRGAQ	12	1379.71	UCH37C88A_DEUBAD_Ub	10	1382.41	0.23606	1.85813	0.242713	5.20115	0.003167
UCHL5_HUMAN	19	31	TELIKGFGCRGAQ	12	1379.71	UCH37C88A_DEUBAD_Ub	30	1383.6	0.06923	3.05097	0.089322	5.31153	0.029129
UCHL5_HUMAN	19	31	TELIKGFGCRGAQ	12	1379.71	UCH37C88A_DEUBAD_Ub	60	1383.95	0.190739	3.39332	0.198914	5.20604	0.003401
UCHL5_HUMAN	19	31	TELIKGFGCRGAQ	12	1379.71	UCH37C88A_DEUBAD_Ub	120	1383.9	0.225232	3.35217	0.232197	5.20941	0.005091
UCHL5_HUMAN	21	31	LIKGFGCRGAQ	10	1149.62	UCH37C88A_DEUBAD	0	1150.29	0.099858	0	0	4.66269	0.035518
UCHL5_HUMAN	21	31	LIKGFGCRGAQ	10	1149.62	UCH37C88A_DEUBAD	1	1151.85	0.055457	1.55404	0.114224	4.66303	0.017955
UCHL5_HUMAN	21	31	LIKGFGCRGAQ	10	1149.62	UCH37C88A_DEUBAD	10	1152.24	0.21569	1.94485	0.237685	4.66404	0.020139
UCHL5_HUMAN	21	31	LIKGFGCRGAQ	10	1149.62	UCH37C88A_DEUBAD	30	1152.74	0.116528	2.45102	0.153462	4.66319	0.010629
UCHL5_HUMAN	21	31	LIKGFGCRGAQ	10	1149.62	UCH37C88A_DEUBAD	60	1153.15	0.09618	2.85546	0.138645	4.66541	0.009419
UCHL5_HUMAN	21	31	LIKGFGCRGAQ	10	1149.62	UCH37C88A_DEUBAD	120	1153.57	0.047057	3.27322	0.11039	4.66476	0.006436
UCHL5_HUMAN	21	31	LIKGFGCRGAQ	10	1149.62	UCH37C88A_DEUBAD_K48 Ub2	0	1150.29	0.099858	0	0	4.66269	0.035518
UCHL5_HUMAN	21	31	LIKGFGCRGAQ	10	1149.62	UCH37C88A_DEUBAD_K48 Ub2	1	1151.8	0.059844	1.50392	0.116417	4.65375	0.01607
UCHL5_HUMAN	21	31	LIKGFGCRGAQ	10	1149.62	UCH37C88A_DEUBAD_K48 Ub2	10	1152.4	0.066511	2.10955	0.119981	4.64721	0.021575
UCHL5_HUMAN	21	31	LIKGFGCRGAQ	10	1149.62	UCH37C88A_DEUBAD_K48 Ub2	30	1153.01	0.105018	2.71314	0.144916	4.64371	0.032171
UCHL5_HUMAN	21	31	LIKGFGCRGAQ	10	1149.62	UCH37C88A_DEUBAD_K48 Ub2	60	1153.34	0.059322	3.04947	0.11615	4.64187	0.018773
UCHL5_HUMAN	21	31	LIKGFGCRGAQ	10	1149.62	UCH37C88A_DEUBAD_K48 Ub2	120	1153.24	0.06731	2.95107	0.120426	4.63389	0.021043
UCHL5_HUMAN	21	31	LIKGFGCRGAQ	10	1149.62	UCH37C88A_DEUBAD_K48 Ub3	0	1150.29	0.099858	0	0	4.66269	0.035518
UCHL5_HUMAN	21	31	LIKGFGCRGAQ	10	1149.62	UCH37C88A_DEUBAD_K48 Ub3	1	1151.93	0.063825	1.6335	0.118513	4.64794	0.018113
UCHL5_HUMAN	21	31	LIKGFGCRGAQ	10	1149.62	UCH37C88A_DEUBAD_K48 Ub3	10	1152.54	0.221476	2.24367	0.242948	4.65641	0.011679
UCHL5_HUMAN	21	31	LIKGFGCRGAQ	10	1149.62	UCH37C88A_DEUBAD_K48 Ub3	30	1153.03	0.179838	2.73294	0.205703	4.65748	0.010719
UCHL5_HUMAN	21	31	LIKGFGCRGAQ	10	1149.62	UCH37C88A_DEUBAD_K48 Ub3	60	1153.18	0.059868	2.88931	0.11643	4.65554	0.008048
UCHL5_HUMAN	21	31	LIKGFGCRGAQ	10	1149.62	UCH37C88A_DEUBAD_K48 Ub3	120	1153.33	0.108878	3.03504	0.147737	4.64624	0.006996
UCHL5_HUMAN	21	31	LIKGFGCRGAQ	10	1149.62	UCH37C88A_DEUBAD_K6/48 Ub3	0	1150.29	0.099858	0	0	4.66269	0.035518
UCHL5_HUMAN	21	31	LIKGFGCRGAQ	10	1149.62	UCH37C88A_DEUBAD_K6/48 Ub3	1	1151.83	0.136542	1.54058	0.169161	4.66049	0.012961
UCHL5_HUMAN	21	31	LIKGFGCRGAQ	10	1149.62	UCH37C88A_DEUBAD_K6/48 Ub3	10	1152.62	0.191775	2.32397	0.216216	4.64542	0.019396
UCHL5_HUMAN	21	31	LIKGFGCRGAQ	10	1149.62	UCH37C88A_DEUBAD_K6/48 Ub3	30	1152.99	0.11327	2.69197	0.151003	4.64826	0.017054
UCHL5_HUMAN	21	31	LIKGFGCRGAQ	10	1149.62	UCH37C88A_DEUBAD_K6/48 Ub3	60	1153.25	0.092284	2.95246	0.135971	4.65875	0.015401
UCHL5_HUMAN	21	31	LIKGFGCRGAQ	10	1149.62	UCH37C88A_DEUBAD_K6/48 Ub3	120	1153.67	0.258235	3.37994	0.27687	4.64264	0.00608
UCHL5_HUMAN	21	31	LIKGFGCRGAQ	10	1149.62	UCH37C88A_DEUBAD_Ub	0	1150.29	0.099858	0	0	4.66269	0.035518
UCHL5_HUMAN	21	31	LIKGFGCRGAQ	10	1149.62	UCH37C88A_DEUBAD_Ub	1	1152.13	0.094805	1.83867	0.137694	4.57369	0.00554
UCHL5_HUMAN	21	31	LIKGFGCRGAQ	10	1149.62	UCH37C88A_DEUBAD_Ub	10	1152.67	0.225653	2.37975	0.246761	4.55771	0.001311
UCHL5_HUMAN	21	31	LIKGFGCRGAQ	10	1149.62	UCH37C88A_DEUBAD_Ub	30	1153.4	0.119107	3.10222	0.155429	4.58457	0.0475
UCHL5_HUMAN	21	31	LIKGFGCRGAQ	10	1149.62	UCH37C88A_DEUBAD_Ub	60	1153.62	0.134647	3.32179	0.167635	4.58186	0.041195
UCHL5_HUMAN	21	31	LIKGFGCRGAQ	10	1149.62	UCH37C88A_DEUBAD_Ub	120	1153.91	0.052592	3.61728	0.112861	4.56661	0.000815
UCHL5_HUMAN	22	31	IKGFGCRGAQ	9	1036.54	UCH37C88A_DEUBAD	0	1037.53	0.19669	0	0	4.0917	0.042244
UCHL5_HUMAN	22	31	IKGFGCRGAQ	9	1036.54	UCH37C88A_DEUBAD	1	1039.06	0.21963	1.52886	0.294829	4.09303	0.013649
UCHL5_HUMAN	22	31	IKGFGCRGAQ	9	1036.54	UCH37C88A_DEUBAD	10	1039.35	0.279993	1.81627	0.342174	4.08913	0.014491
UCHL5_HUMAN	22	31	IKGFGCRGAQ	9	1036.54	UCH37C88A_DEUBAD	30	1039.73	0.116304	2.20182	0.228503	4.09096	0.006314
UCHL5_HUMAN	22	31	IKGFGCRGAQ	9	1036.54	UCH37C88A_DEUBAD	60	1040.08	0.078703	2.54557	0.211852	4.09756	0.005169
UCHL5_HUMAN	22	31	IKGFGCRGAQ	9	1036.54	UCH37C88A_DEUBAD	120	1040.49	0.03576	2.96198	0.199915	4.09239	0.004566
UCHL5_HUMAN	22	31	IKGFGCRGAQ	9	1036.54	UCH37C88A_DEUBAD_K48 Ub2	0	1037.53	0.19669	0	0	4.0917	0.042244
UCHL5_HUMAN	22	31	IKGFGCRGAQ	9	1036.54	UCH37C88A_DEUBAD_K48 Ub2	1	1038.85	0.094083	1.31595	0.218034	4.08424	0.0096
UCHL5_HUMAN	22	31	IKGFGCRGAQ	9	1036.54	UCH37C88A_DEUBAD_K48 Ub2	10	1039.43	0.062709	1.90084	0.206445	4.07467	0.022072
UCHL5_HUMAN	22	31	IKGFGCRGAQ	9	1036.54	UCH37C88A_DEUBAD_K48 Ub2	30	1040	0.114991	2.4715	0.227838	4.07012	0.029996
UCHL5_HUMAN	22	31	IKGFGCRGAQ	9	1036.54	UCH37C88A_DEUBAD_K48 Ub2	60	1040.39	0.172702	2.85477	0.26175	4.08086	0.01901
UCHL5_HUMAN	22	31	IKGFGCRGAQ	9	1036.54	UCH37C88A_DEUBAD_K48 Ub2	120	1040.23	0.081013	2.70104	0.212721	4.06621	0.019077
UCHL5_HUMAN	22	31	IKGFGCRGAQ	9	1036.54	UCH37C88A_DEUBAD_K48 Ub3	0	1037.53	0.19669	0	0	4.0917	0.042244
UCHL5_HUMAN	22	31	IKGFGCRGAQ	9	1036.54	UCH37C88A_DEUBAD_K48 Ub3	1	1039.21	0.21	1.6734	0.287728	4.08377	0.016743
UCHL5_HUMAN	22	31	IKGFGCRGAQ	9	1036.54	UCH37C88A_DEUBAD_K48 Ub3	10	1039.63	0.255842	2.09965	0.322711	4.08814	0.01349
UCHL5_HUMAN	22	31	IKGFGCRGAQ	9	1036.54	UCH37C88A_DEUBAD_K48 Ub3	30	1040.07	0.190664	2.5353	0.273934	4.08422	0.012947
UCHL5_HUMAN	22	31	IKGFGCRGAQ	9	1036.54	UCH37C88A_DEUBAD_K48 Ub3	60	1040.17	0.07924	2.63553	0.212052	4.08932	0.007995
UCHL5_HUMAN	22	31	IKGFGCRGAQ	9	1036.54	UCH37C88A_DEUBAD_K48 Ub3	120	1040.34	0.102969	2.81	0.222013	4.08209	0.005129
UCHL5_HUMAN	22	31	IKGFGCRGAQ	9	1036.54	UCH37C88A_DEUBAD_K6/48 Ub3	0	1037.53	0.19669	0	0	4.0917	0.042244
UCHL5_HUMAN	22	31	IKGFGCRGAQ	9	1036.54	UCH37C88A_DEUBAD_K6/48 Ub3	1	1039.04	0.136105	1.50852	0.23919	4.09499	0.010362
UCHL5_HUMAN	22	31	IKGFGCRGAQ	9	1036.54	UCH37C88A_DEUBAD_K6/48 Ub3	10	1039.76	0.248994	2.23157	0.31731	4.07603	0.018427
UCHL5_HUMAN	22	31	IKGFGCRGAQ	9	1036.54	UCH37C88A_DEUBAD_K6/48 Ub3	30	1040.13	0.144424	2.59226	0.244019	4.0775	0.014048
UCHL5_HUMAN	22	31	IKGFGCRGAQ	9	1036.54	UCH37C88A_DEUBAD_K6/48 Ub3	60	1040.3	0.153189	2.77009	0.249307	4.08962	0.01468
UCHL5_HUMAN	22	31	IKGFGCRGAQ	9	1036.54	UCH37C88A_DEUBAD_K6/48 Ub3	120	1040.82	0.12211	3.28518	0.231512	4.07867	0.007755
UCHL5_HUMAN	22	31	IKGFGCRGAQ	9	1036.54	UCH37C88A_DEUBAD_Ub	0	1037.53	0.19669	0	0	4.0917	0.042244
UCHL5_HUMAN	22	31	IKGFGCRGAQ	9	1036.54	UCH37C88A_DEUBAD_Ub	1	1039.37	0.257886	1.83516	0.324333	3.99074	0.007352
UCHL5_HUMAN	22	31	IKGFGCRGAQ	9	1036.54	UCH37C88A_DEUBAD_Ub	10	1039.92	0.36288	2.38696	0.412758	3.97373	0.004249
UCHL5_HUMAN	22	31	IKGFGCRGAQ	9	1036.54	UCH37C88A_DEUBAD_Ub	30	1040.36	0.179973	2.8248	0.266603	4.02466	0.072961
UCHL5_HUMAN	22	31	IKGFGCRGAQ	9	1036.54	UCH37C88A_DEUBAD_Ub	60	1040.54	0.240615	3.01112	0.310778	3.9845	0.027924
UCHL5_HUMAN	22	31	IKGFGCRGAQ	9	1036.54	UCH37C88A_DEUBAD_Ub	120	1040.56	0.291819	3.02983	0.351917	3.97583	0.003642
UCHL5_HUMAN	22	32	IKGFGCRGAQV	10	1135.6	UCH37C88A_DEUBAD	0	1136.2	0.079786	0	0	4.7459	0.035074
UCHL5_HUMAN	22	32	IKGFGCRGAQV	10	1135.6	UCH37C88A_DEUBAD	1	1137.5	0.101777	1.30412	0.129323	4.75724	0.019234
UCHL5_HUMAN	22	32	IKGFGCRGAQV	10	1135.6	UCH37C88A_DEUBAD	10	1137.97	0.18875	1.77435	0.204921	4.76096	0.020867
UCHL5_HUMAN	22	32	IKGFGCRGAQV	10	1135.6	UCH37C88A_DEUBAD	30	1138.49	0.131939	2.2985	0.154188	4.75817	0.01054
UCHL5_HUMAN	22	32	IKGFGCRGAQV	10	1135.6	UCH37C88A_DEUBAD	60	1138.89	0.115259	2.69218	0.14018	4.76182	0.011792
UCHL5_HUMAN	22	32	IKGFGCRGAQV	10	1135.6	UCH37C88A_DEUBAD	120	1139.4	0.12058	3.20296	0.144587	4.7618	0.003166
UCHL5_HUMAN	22	32	IKGFGCRGAQV	10	1135.6	UCH37C88A_DEUBAD_K48 Ub2	0	1136.2	0.079786	0	0	4.7459	0.035074
UCHL5_HUMAN	22	32	IKGFGCRGAQV	10	1135.6	UCH37C88A_DEUBAD_K48 Ub2	1	1137.61	0.175147	1.41097	0.192464	4.75451	0.020615
UCHL5_HUMAN	22	32	IKGFGCRGAQV	10	1135.6	UCH37C88A_DEUBAD_K48 Ub2	10	1138.22	0.17211	2.02189	0.189704	4.75158	0.020419
UCHL5_HUMAN	22	32	IKGFGCRGAQV	10	1135.6	UCH37C88A_DEUBAD_K48 Ub2	30	1138.78	0.14861	2.58911	0.168673	4.74842	0.031916
UCHL5_HUMAN	22	32	IKGFGCRGAQV	10	1135.6	UCH37C88A_DEUBAD_K48 Ub2	60	1139.11	0.10749	2.91126	0.133865	4.74866	0.018539
UCHL5_HUMAN	22	32	IKGFGCRGAQV	10	1135.6	UCH37C88A_DEUBAD_K48 Ub2	120	1139.07	0.213586	2.87366	0.228002	4.73609	0.021013
UCHL5_HUMAN	22	32	IKGFGCRGAQV	10	1135.6	UCH37C88A_DEUBAD_K48 Ub3	0	1136.2	0.079786	0	0	4.7459	0.035074
UCHL5_HUMAN	22	32	IKGFGCRGAQV	10	1135.6	UCH37C88A_DEUBAD_K48 Ub3	1	1137.71	0.078433	1.51063	0.111882	4.74857	0.020335
UCHL5_HUMAN	22	32	IKGFGCRGAQV	10	1135.6	UCH37C88A_DEUBAD_K48 Ub3	10	1138.34	0.24894	2.14691	0.261414	4.75566	0.011679
UCHL5_HUMAN	22	32	IKGFGCRGAQV	10	1135.6	UCH37C88A_DEUBAD_K48 Ub3	30	1138.79	0.215223	2.59196	0.229536	4.7563	0.010401
UCHL5_HUMAN	22	32	IKGFGCRGAQV	10	1135.6	UCH37C88A_DEUBAD_K48 Ub3	60	1139	0.098188	2.80084	0.126518	4.75514	0.00822
UCHL5_HUMAN	22	32	IKGFGCRGAQV	10	1135.6	UCH37C88A_DEUBAD_K48 Ub3	120	1139.22	0.06025	3.02565	0.099979	4.74608	0.005547
UCHL5_HUMAN	22	32	IKGFGCRGAQV	10	1135.6	UCH37C88A_DEUBAD_K6/48 Ub3	0	1136.2	0.079786	0	0	4.7459	0.035074
UCHL5_HUMAN	22	32	IKGFGCRGAQV	10	1135.6	UCH37C88A_DEUBAD_K6/48 Ub3	1	1137.59	0.133117	1.39919	0.155197	4.76191	0.013818
UCHL5_HUMAN	22	32	IKGFGCRGAQV	10	1135.6	UCH37C88A_DEUBAD_K6/48 Ub3	10	1138.43	0.267653	2.23463	0.279292	4.74596	0.018853
UCHL5_HUMAN	22	32	IKGFGCRGAQV	10	1135.6	UCH37C88A_DEUBAD_K6/48 Ub3	30	1138.91	0.195588	2.71081	0.211235	4.74759	0.014915
UCHL5_HUMAN	22	32	IKGFGCRGAQV	10	1135.6	UCH37C88A_DEUBAD_K6/48 Ub3	60	1139.2	0.183307	2.99989	0.199918	4.75632	0.012897
UCHL5_HUMAN	22	32	IKGFGCRGAQV	10	1135.6	UCH37C88A_DEUBAD_K6/48 Ub3	120	1139.82	0.114122	3.62655	0.139247	4.74192	0.005244
UCHL5_HUMAN	22	32	IKGFGCRGAQV	10	1135.6	UCH37C88A_DEUBAD_Ub	0	1136.2	0.079786	0	0	4.7459	0.035074
UCHL5_HUMAN	22	32	IKGFGCRGAQV	10	1135.6	UCH37C88A_DEUBAD_Ub	1	1137.86	0.202144	1.6686	0.21732	4.70294	0.046389
UCHL5_HUMAN	22	32	IKGFGCRGAQV	10	1135.6	UCH37C88A_DEUBAD_Ub	10	1138.4	0.238776	2.20406	0.251753	4.70516	0.063487
UCHL5_HUMAN	22	32	IKGFGCRGAQV	10	1135.6	UCH37C88A_DEUBAD_Ub	30	1139.2	0.211899	3.00294	0.226422	4.70434	0.062224
UCHL5_HUMAN	22	32	IKGFGCRGAQV	10	1135.6	UCH37C88A_DEUBAD_Ub	60	1139.15	0.214512	2.95813	0.22887	4.69295	0.051802
UCHL5_HUMAN	22	32	IKGFGCRGAQV	10	1135.6	UCH37C88A_DEUBAD_Ub	120	1139.28	0.334155	3.08133	0.343549	4.66489	0.002707
UCHL5_HUMAN	22	33	IKGFGCRGAQVE	11	1264.65	UCH37C88A_DEUBAD	0	1265.37	0.090948	0	0	4.57698	0.03572
UCHL5_HUMAN	22	33	IKGFGCRGAQVE	11	1264.65	UCH37C88A_DEUBAD	1	1267.13	0.447046	1.76285	0.456203	4.59035	0.019031
UCHL5_HUMAN	22	33	IKGFGCRGAQVE	11	1264.65	UCH37C88A_DEUBAD	10	1267.28	0.279561	1.91056	0.293983	4.5871	0.025759
UCHL5_HUMAN	22	33	IKGFGCRGAQVE	11	1264.65	UCH37C88A_DEUBAD	30	1267.7	0.174479	2.3385	0.19676	4.58621	0.014115
UCHL5_HUMAN	22	33	IKGFGCRGAQVE	11	1264.65	UCH37C88A_DEUBAD	60	1268.12	0.114613	2.75067	0.146314	4.59187	0.012462
UCHL5_HUMAN	22	33	IKGFGCRGAQVE	11	1264.65	UCH37C88A_DEUBAD	120	1268.59	0.019704	3.22111	0.093058	4.58784	0.001893
UCHL5_HUMAN	22	33	IKGFGCRGAQVE	11	1264.65	UCH37C88A_DEUBAD_K48 Ub2	0	1265.37	0.090948	0	0	4.57698	0.03572
UCHL5_HUMAN	22	33	IKGFGCRGAQVE	11	1264.65	UCH37C88A_DEUBAD_K48 Ub2	1	1266.83	0.077295	1.46019	0.119357	4.58246	0.019329
UCHL5_HUMAN	22	33	IKGFGCRGAQVE	11	1264.65	UCH37C88A_DEUBAD_K48 Ub2	10	1267.56	0.260228	2.19426	0.275663	4.57642	0.017267
UCHL5_HUMAN	22	33	IKGFGCRGAQVE	11	1264.65	UCH37C88A_DEUBAD_K48 Ub2	30	1268.03	0.182416	2.66618	0.203831	4.57574	0.028927
UCHL5_HUMAN	22	33	IKGFGCRGAQVE	11	1264.65	UCH37C88A_DEUBAD_K48 Ub2	60	1268.39	0.122695	3.02008	0.152727	4.56887	0.01638
UCHL5_HUMAN	22	33	IKGFGCRGAQVE	11	1264.65	UCH37C88A_DEUBAD_K48 Ub2	120	1268.33	0.088542	2.96781	0.12693	4.56079	0.016406
UCHL5_HUMAN	22	33	IKGFGCRGAQVE	11	1264.65	UCH37C88A_DEUBAD_K48 Ub3	0	1265.37	0.090948	0	0	4.57698	0.03572
UCHL5_HUMAN	22	33	IKGFGCRGAQVE	11	1264.65	UCH37C88A_DEUBAD_K48 Ub3	1	1267.09	0.22203	1.72578	0.239935	4.5762	0.020197
UCHL5_HUMAN	22	33	IKGFGCRGAQVE	11	1264.65	UCH37C88A_DEUBAD_K48 Ub3	10	1267.61	0.308975	2.24269	0.322082	4.5829	0.010647
UCHL5_HUMAN	22	33	IKGFGCRGAQVE	11	1264.65	UCH37C88A_DEUBAD_K48 Ub3	30	1268.1	0.285087	2.73122	0.299242	4.58355	0.010237
UCHL5_HUMAN	22	33	IKGFGCRGAQVE	11	1264.65	UCH37C88A_DEUBAD_K48 Ub3	60	1268.26	0.119675	2.89377	0.150312	4.58075	0.007685
UCHL5_HUMAN	22	33	IKGFGCRGAQVE	11	1264.65	UCH37C88A_DEUBAD_K48 Ub3	120	1268.5	0.215073	3.13028	0.233512	4.57152	0.006251
UCHL5_HUMAN	22	33	IKGFGCRGAQVE	11	1264.65	UCH37C88A_DEUBAD_K6/48 Ub3	0	1265.37	0.090948	0	0	4.57698	0.03572
UCHL5_HUMAN	22	33	IKGFGCRGAQVE	11	1264.65	UCH37C88A_DEUBAD_K6/48 Ub3	1	1266.92	0.216978	1.5588	0.235268	4.5856	0.012858
UCHL5_HUMAN	22	33	IKGFGCRGAQVE	11	1264.65	UCH37C88A_DEUBAD_K6/48 Ub3	10	1267.69	0.325972	2.32273	0.338422	4.57204	0.017913
UCHL5_HUMAN	22	33	IKGFGCRGAQVE	11	1264.65	UCH37C88A_DEUBAD_K6/48 Ub3	30	1268.22	0.22807	2.85215	0.245535	4.57225	0.013873
UCHL5_HUMAN	22	33	IKGFGCRGAQVE	11	1264.65	UCH37C88A_DEUBAD_K6/48 Ub3	60	1268.35	0.200728	2.98085	0.22037	4.58209	0.016118
UCHL5_HUMAN	22	33	IKGFGCRGAQVE	11	1264.65	UCH37C88A_DEUBAD_K6/48 Ub3	120	1269.06	0.371514	3.69309	0.382484	4.569	0.004719
UCHL5_HUMAN	22	33	IKGFGCRGAQVE	11	1264.65	UCH37C88A_DEUBAD_Ub	0	1265.37	0.090948	0	0	4.57698	0.03572
UCHL5_HUMAN	22	33	IKGFGCRGAQVE	11	1264.65	UCH37C88A_DEUBAD_Ub	1	1267.22	0.132395	1.85555	0.160623	4.5198	0.034985
UCHL5_HUMAN	22	33	IKGFGCRGAQVE	11	1264.65	UCH37C88A_DEUBAD_Ub	10	1267.88	0.305598	2.513	0.318844	4.50638	0.036388
UCHL5_HUMAN	22	33	IKGFGCRGAQVE	11	1264.65	UCH37C88A_DEUBAD_Ub	30	1268.77	0.050404	3.40694	0.103981	4.49469	0.000231
UCHL5_HUMAN	22	33	IKGFGCRGAQVE	11	1264.65	UCH37C88A_DEUBAD_Ub	60	1269.01	0.075164	3.64443	0.117988	4.4961	0.002664
UCHL5_HUMAN	22	33	IKGFGCRGAQVE	11	1264.65	UCH37C88A_DEUBAD_Ub	120	1269.18	0.000914	3.81329	0.090952	4.50606	0.005696
UCHL5_HUMAN	36	42	WSLEPEN	5	874.394	UCH37C88A_DEUBAD	0	874.875	0.042153	0	0	6.35781	0.047807
UCHL5_HUMAN	36	42	WSLEPEN	5	874.394	UCH37C88A_DEUBAD	1	877.172	0.082536	2.29735	0.092678	6.35231	0.027909
UCHL5_HUMAN	36	42	WSLEPEN	5	874.394	UCH37C88A_DEUBAD	10	877.618	0.084423	2.74273	0.094362	6.35223	0.026366
UCHL5_HUMAN	36	42	WSLEPEN	5	874.394	UCH37C88A_DEUBAD	30	877.813	0.059578	2.93841	0.072983	6.34419	0.021838
UCHL5_HUMAN	36	42	WSLEPEN	5	874.394	UCH37C88A_DEUBAD	60	877.844	0.046086	2.96956	0.062456	6.35341	0.02085
UCHL5_HUMAN	36	42	WSLEPEN	5	874.394	UCH37C88A_DEUBAD	120	877.809	0.070186	2.9342	0.081872	6.33951	0.00148
UCHL5_HUMAN	36	42	WSLEPEN	5	874.394	UCH37C88A_DEUBAD_K48 Ub2	0	874.875	0.042153	0	0	6.35781	0.047807
UCHL5_HUMAN	36	42	WSLEPEN	5	874.394	UCH37C88A_DEUBAD_K48 Ub2	1	877.051	0.039009	2.17585	0.057434	6.33093	0.018089
UCHL5_HUMAN	36	42	WSLEPEN	5	874.394	UCH37C88A_DEUBAD_K48 Ub2	10	877.251	0.074263	2.37651	0.085392	6.32832	0.022568
UCHL5_HUMAN	36	42	WSLEPEN	5	874.394	UCH37C88A_DEUBAD_K48 Ub2	30	877.561	0.035174	2.68608	0.054901	6.32541	0.030295
UCHL5_HUMAN	36	42	WSLEPEN	5	874.394	UCH37C88A_DEUBAD_K48 Ub2	60	877.684	0.026419	2.80944	0.049748	6.33107	0.022857
UCHL5_HUMAN	36	42	WSLEPEN	5	874.394	UCH37C88A_DEUBAD_K48 Ub2	120	877.756	0.024177	2.88084	0.048594	6.31504	0.015761
UCHL5_HUMAN	36	42	WSLEPEN	5	874.394	UCH37C88A_DEUBAD_K48 Ub3	0	874.875	0.042153	0	0	6.35781	0.047807
UCHL5_HUMAN	36	42	WSLEPEN	5	874.394	UCH37C88A_DEUBAD_K48 Ub3	1	877.075	0.042533	2.20024	0.059883	6.34618	0.022278
UCHL5_HUMAN	36	42	WSLEPEN	5	874.394	UCH37C88A_DEUBAD_K48 Ub3	10	877.27	0.07578	2.39471	0.086715	6.35243	0.014113
UCHL5_HUMAN	36	42	WSLEPEN	5	874.394	UCH37C88A_DEUBAD_K48 Ub3	30	877.537	0.071953	2.66206	0.083391	6.35406	0.014302
UCHL5_HUMAN	36	42	WSLEPEN	5	874.394	UCH37C88A_DEUBAD_K48 Ub3	60	877.724	0.030764	2.84956	0.052185	6.35176	0.0124
UCHL5_HUMAN	36	42	WSLEPEN	5	874.394	UCH37C88A_DEUBAD_K48 Ub3	120	877.743	0.019779	2.86825	0.046563	6.34322	0.013028
UCHL5_HUMAN	36	42	WSLEPEN	5	874.394	UCH37C88A_DEUBAD_K6/48 Ub3	0	874.875	0.042153	0	0	6.35781	0.047807
UCHL5_HUMAN	36	42	WSLEPEN	5	874.394	UCH37C88A_DEUBAD_K6/48 Ub3	1	877.038	0.105436	2.16281	0.11355	6.36066	0.013531
UCHL5_HUMAN	36	42	WSLEPEN	5	874.394	UCH37C88A_DEUBAD_K6/48 Ub3	10	877.244	0.073413	2.36888	0.084654	6.33649	0.019609
UCHL5_HUMAN	36	42	WSLEPEN	5	874.394	UCH37C88A_DEUBAD_K6/48 Ub3	30	877.497	0.085947	2.62247	0.095728	6.33815	0.01563
UCHL5_HUMAN	36	42	WSLEPEN	5	874.394	UCH37C88A_DEUBAD_K6/48 Ub3	60	877.701	0.050717	2.82581	0.065948	6.34483	0.020724
UCHL5_HUMAN	36	42	WSLEPEN	5	874.394	UCH37C88A_DEUBAD_K6/48 Ub3	120	877.734	0.071072	2.85934	0.082633	6.33171	0.003144
UCHL5_HUMAN	36	42	WSLEPEN	5	874.394	UCH37C88A_DEUBAD_Ub	0	874.875	0.042153	0	0	6.35781	0.047807
UCHL5_HUMAN	36	42	WSLEPEN	5	874.394	UCH37C88A_DEUBAD_Ub	1	876.961	0.076398	2.08625	0.087255	6.18459	0.006793
UCHL5_HUMAN	36	42	WSLEPEN	5	874.394	UCH37C88A_DEUBAD_Ub	10	877.126	0.069054	2.25127	0.080904	6.17215	0.002475
UCHL5_HUMAN	36	42	WSLEPEN	5	874.394	UCH37C88A_DEUBAD_Ub	30	877.438	0.062985	2.56315	0.075789	6.17287	0.00069
UCHL5_HUMAN	36	42	WSLEPEN	5	874.394	UCH37C88A_DEUBAD_Ub	60	877.521	0.06013	2.64615	0.073433	6.17911	0.003583
UCHL5_HUMAN	36	42	WSLEPEN	5	874.394	UCH37C88A_DEUBAD_Ub	120	877.553	0.040227	2.67815	0.058268	6.17573	0.005102
UCHL5_HUMAN	36	43	WSLEPENF	6	1021.46	UCH37C88A_DEUBAD	0	1022.11	0.124276	0	0	7.62818	0.039177
UCHL5_HUMAN	36	43	WSLEPENF	6	1021.46	UCH37C88A_DEUBAD	1	1024.4	0.173571	2.29442	0.213475	7.62903	0.030378
UCHL5_HUMAN	36	43	WSLEPENF	6	1021.46	UCH37C88A_DEUBAD	10	1025.09	0.255366	2.98725	0.284001	7.6315	0.030395
UCHL5_HUMAN	36	43	WSLEPENF	6	1021.46	UCH37C88A_DEUBAD	30	1025.26	0.250802	3.15677	0.279904	7.61899	0.032844
UCHL5_HUMAN	36	43	WSLEPENF	6	1021.46	UCH37C88A_DEUBAD	60	1025.26	0.277131	3.14972	0.303721	7.63106	0.029103
UCHL5_HUMAN	36	43	WSLEPENF	6	1021.46	UCH37C88A_DEUBAD	120	1025.28	0.25251	3.17308	0.281435	7.60888	0.000734
UCHL5_HUMAN	36	43	WSLEPENF	6	1021.46	UCH37C88A_DEUBAD_K48 Ub2	0	1022.11	0.124276	0	0	7.62818	0.039177
UCHL5_HUMAN	36	43	WSLEPENF	6	1021.46	UCH37C88A_DEUBAD_K48 Ub2	1	1024.23	0.123225	2.12581	0.175012	7.63227	0.021509
UCHL5_HUMAN	36	43	WSLEPENF	6	1021.46	UCH37C88A_DEUBAD_K48 Ub2	10	1024.71	0.198183	2.59859	0.233926	7.62159	0.021954
UCHL5_HUMAN	36	43	WSLEPENF	6	1021.46	UCH37C88A_DEUBAD_K48 Ub2	30	1024.92	0.214697	2.81206	0.248072	7.61767	0.029228
UCHL5_HUMAN	36	43	WSLEPENF	6	1021.46	UCH37C88A_DEUBAD_K48 Ub2	60	1025.07	0.20349	2.95778	0.238439	7.62127	0.023013
UCHL5_HUMAN	36	43	WSLEPENF	6	1021.46	UCH37C88A_DEUBAD_K48 Ub2	120	1025.15	0.191815	3.03827	0.228555	7.60162	0.006344
UCHL5_HUMAN	36	43	WSLEPENF	6	1021.46	UCH37C88A_DEUBAD_K48 Ub3	0	1022.11	0.124276	0	0	7.62818	0.039177
UCHL5_HUMAN	36	43	WSLEPENF	6	1021.46	UCH37C88A_DEUBAD_K48 Ub3	1	1024.21	0.101321	2.10086	0.160345	7.64044	0.01688
UCHL5_HUMAN	36	43	WSLEPENF	6	1021.46	UCH37C88A_DEUBAD_K48 Ub3	10	1024.64	0.169891	2.53641	0.210493	7.64598	0.015214
UCHL5_HUMAN	36	43	WSLEPENF	6	1021.46	UCH37C88A_DEUBAD_K48 Ub3	30	1024.9	0.178606	2.78944	0.217588	7.65402	0.016278
UCHL5_HUMAN	36	43	WSLEPENF	6	1021.46	UCH37C88A_DEUBAD_K48 Ub3	60	1025.08	0.178569	2.97508	0.217558	7.65025	0.013171
UCHL5_HUMAN	36	43	WSLEPENF	6	1021.46	UCH37C88A_DEUBAD_K48 Ub3	120	1025.15	0.140751	3.04376	0.187765	7.63708	0.015288
UCHL5_HUMAN	36	43	WSLEPENF	6	1021.46	UCH37C88A_DEUBAD_K6/48 Ub3	0	1022.11	0.124276	0	0	7.62818	0.039177
UCHL5_HUMAN	36	43	WSLEPENF	6	1021.46	UCH37C88A_DEUBAD_K6/48 Ub3	1	1024.13	0.109885	2.0218	0.165889	7.64004	0.016004
UCHL5_HUMAN	36	43	WSLEPENF	6	1021.46	UCH37C88A_DEUBAD_K6/48 Ub3	10	1024.69	0.115812	2.58313	0.169873	7.62492	0.017996
UCHL5_HUMAN	36	43	WSLEPENF	6	1021.46	UCH37C88A_DEUBAD_K6/48 Ub3	30	1024.93	0.136579	2.82415	0.184658	7.62662	0.015761
UCHL5_HUMAN	36	43	WSLEPENF	6	1021.46	UCH37C88A_DEUBAD_K6/48 Ub3	60	1025.07	0.14981	2.96058	0.194647	7.62738	0.018496
UCHL5_HUMAN	36	43	WSLEPENF	6	1021.46	UCH37C88A_DEUBAD_K6/48 Ub3	120	1025.14	0.140482	3.03034	0.187563	7.62009	0.0082
UCHL5_HUMAN	36	43	WSLEPENF	6	1021.46	UCH37C88A_DEUBAD_Ub	0	1022.11	0.124276	0	0	7.62818	0.039177
UCHL5_HUMAN	36	43	WSLEPENF	6	1021.46	UCH37C88A_DEUBAD_Ub	1	1024.4	0.046744	2.29681	0.132776	7.4753	0.004513
UCHL5_HUMAN	36	43	WSLEPENF	6	1021.46	UCH37C88A_DEUBAD_Ub	10	1025.02	0.218359	2.91506	0.251247	7.51479	0.070854
UCHL5_HUMAN	36	43	WSLEPENF	6	1021.46	UCH37C88A_DEUBAD_Ub	30	1025.26	0.157532	3.1525	0.200652	7.51783	0.076308
UCHL5_HUMAN	36	43	WSLEPENF	6	1021.46	UCH37C88A_DEUBAD_Ub	60	1025.32	0.106224	3.21238	0.163487	7.51687	0.068145
UCHL5_HUMAN	36	43	WSLEPENF	6	1021.46	UCH37C88A_DEUBAD_Ub	120	1025.28	0.066713	3.17143	0.14105	7.47276	0.00526
UCHL5_HUMAN	37	43	SLEPENF	5	835.383	UCH37C88A_DEUBAD	0	835.774	0.029535	0	0	6.13366	0.04978
UCHL5_HUMAN	37	43	SLEPENF	5	835.383	UCH37C88A_DEUBAD	1	837.554	0.164507	1.78021	0.167138	6.1356	0.028651
UCHL5_HUMAN	37	43	SLEPENF	5	835.383	UCH37C88A_DEUBAD	10	838.325	0.200669	2.55106	0.202831	6.13571	0.024309
UCHL5_HUMAN	37	43	SLEPENF	5	835.383	UCH37C88A_DEUBAD	30	838.504	0.113571	2.73052	0.117349	6.12879	0.023109
UCHL5_HUMAN	37	43	SLEPENF	5	835.383	UCH37C88A_DEUBAD	60	838.56	0.15264	2.78613	0.155471	6.13647	0.017399
UCHL5_HUMAN	37	43	SLEPENF	5	835.383	UCH37C88A_DEUBAD	120	838.516	0.135559	2.74298	0.138739	6.13219	0.0017
UCHL5_HUMAN	37	43	SLEPENF	5	835.383	UCH37C88A_DEUBAD_K48 Ub2	0	835.774	0.029535	0	0	6.13366	0.04978
UCHL5_HUMAN	37	43	SLEPENF	5	835.383	UCH37C88A_DEUBAD_K48 Ub2	1	837.431	0.127343	1.65705	0.130723	6.13255	0.016152
UCHL5_HUMAN	37	43	SLEPENF	5	835.383	UCH37C88A_DEUBAD_K48 Ub2	10	837.974	0.137466	2.2006	0.140603	6.12401	0.01907
UCHL5_HUMAN	37	43	SLEPENF	5	835.383	UCH37C88A_DEUBAD_K48 Ub2	30	838.229	0.084995	2.4558	0.08998	6.11772	0.026715
UCHL5_HUMAN	37	43	SLEPENF	5	835.383	UCH37C88A_DEUBAD_K48 Ub2	60	838.429	0.106815	2.6555	0.110823	6.12482	0.021826
UCHL5_HUMAN	37	43	SLEPENF	5	835.383	UCH37C88A_DEUBAD_K48 Ub2	120	838.457	0.000644	2.68361	0.029542	6.11363	0.016113
UCHL5_HUMAN	37	43	SLEPENF	5	835.383	UCH37C88A_DEUBAD_K48 Ub3	0	835.774	0.029535	0	0	6.13366	0.04978
UCHL5_HUMAN	37	43	SLEPENF	5	835.383	UCH37C88A_DEUBAD_K48 Ub3	1	837.486	0.06747	1.71204	0.073651	6.13547	0.017018
UCHL5_HUMAN	37	43	SLEPENF	5	835.383	UCH37C88A_DEUBAD_K48 Ub3	10	838.023	0.046219	2.24985	0.054851	6.13913	0.011725
UCHL5_HUMAN	37	43	SLEPENF	5	835.383	UCH37C88A_DEUBAD_K48 Ub3	30	838.271	0.066064	2.49779	0.072365	6.14338	0.01264
UCHL5_HUMAN	37	43	SLEPENF	5	835.383	UCH37C88A_DEUBAD_K48 Ub3	60	838.409	0.031452	2.63546	0.043146	6.14066	0.009216
UCHL5_HUMAN	37	43	SLEPENF	5	835.383	UCH37C88A_DEUBAD_K48 Ub3	120	838.442	0.128388	2.6687	0.131742	6.13344	0.013172
UCHL5_HUMAN	37	43	SLEPENF	5	835.383	UCH37C88A_DEUBAD_K6/48 Ub3	0	835.774	0.029535	0	0	6.13366	0.04978
UCHL5_HUMAN	37	43	SLEPENF	5	835.383	UCH37C88A_DEUBAD_K6/48 Ub3	1	837.491	0.045974	1.71734	0.054644	6.14693	0.013114
UCHL5_HUMAN	37	43	SLEPENF	5	835.383	UCH37C88A_DEUBAD_K6/48 Ub3	10	837.981	0.070972	2.20798	0.076872	6.12582	0.017962
UCHL5_HUMAN	37	43	SLEPENF	5	835.383	UCH37C88A_DEUBAD_K6/48 Ub3	30	838.235	0.080405	2.4617	0.085658	6.12684	0.013007
UCHL5_HUMAN	37	43	SLEPENF	5	835.383	UCH37C88A_DEUBAD_K6/48 Ub3	60	838.388	0.069168	2.61427	0.07521	6.13045	0.017501
UCHL5_HUMAN	37	43	SLEPENF	5	835.383	UCH37C88A_DEUBAD_K6/48 Ub3	120	838.434	0.017401	2.66095	0.034281	6.12187	0.002185
UCHL5_HUMAN	37	43	SLEPENF	5	835.383	UCH37C88A_DEUBAD_Ub	0	835.774	0.029535	0	0	6.13366	0.04978
UCHL5_HUMAN	37	43	SLEPENF	5	835.383	UCH37C88A_DEUBAD_Ub	1	837.386	0.146001	1.6123	0.148959	5.98481	0.015511
UCHL5_HUMAN	37	43	SLEPENF	5	835.383	UCH37C88A_DEUBAD_Ub	10	837.924	0.160392	2.15056	0.163089	6.00634	0.070726
UCHL5_HUMAN	37	43	SLEPENF	5	835.383	UCH37C88A_DEUBAD_Ub	30	838.178	0.162569	2.40449	0.165231	6.0107	0.075345
UCHL5_HUMAN	37	43	SLEPENF	5	835.383	UCH37C88A_DEUBAD_Ub	60	838.262	0.137199	2.48853	0.140342	6.01139	0.067302
UCHL5_HUMAN	37	43	SLEPENF	5	835.383	UCH37C88A_DEUBAD_Ub	120	838.266	0.146135	2.49283	0.14909	5.9768	0.004602
UCHL5_HUMAN	43	51	FEKLKPVHG	7	1054.6	UCH37C88A_DEUBAD	0	1055.22	0.056025	0	0	3.63325	0.023031
UCHL5_HUMAN	43	51	FEKLKPVHG	7	1054.6	UCH37C88A_DEUBAD	1	1056.4	0.223736	1.17736	0.230644	3.6492	0.013202
UCHL5_HUMAN	43	51	FEKLKPVHG	7	1054.6	UCH37C88A_DEUBAD	10	1057.06	0.033044	1.83711	0.065044	3.64337	0.018263
UCHL5_HUMAN	43	51	FEKLKPVHG	7	1054.6	UCH37C88A_DEUBAD	30	1057.35	0.079246	2.12368	0.09705	3.6441	0.011439
UCHL5_HUMAN	43	51	FEKLKPVHG	7	1054.6	UCH37C88A_DEUBAD	60	1057.6	0.13167	2.38197	0.143094	3.64539	0.010313
UCHL5_HUMAN	43	51	FEKLKPVHG	7	1054.6	UCH37C88A_DEUBAD	120	1057.48	0	2.25366	0.056025	3.64584	0
UCHL5_HUMAN	43	51	FEKLKPVHG	7	1054.6	UCH37C88A_DEUBAD_K48 Ub2	0	1055.22	0.056025	0	0	3.63325	0.023031
UCHL5_HUMAN	43	51	FEKLKPVHG	7	1054.6	UCH37C88A_DEUBAD_K48 Ub2	1	1056.41	0.066049	1.19082	0.08661	3.63535	0.018816
UCHL5_HUMAN	43	51	FEKLKPVHG	7	1054.6	UCH37C88A_DEUBAD_K48 Ub2	10	1057.79	0.135858	2.56692	0.146956	3.63474	0.015076
UCHL5_HUMAN	43	51	FEKLKPVHG	7	1054.6	UCH37C88A_DEUBAD_K48 Ub2	30	1057.83	0.132766	2.60622	0.144103	3.62555	0.02089
UCHL5_HUMAN	43	51	FEKLKPVHG	7	1054.6	UCH37C88A_DEUBAD_K48 Ub2	60	1058.11	0.056677	2.88423	0.079694	3.63329	0.01683
UCHL5_HUMAN	43	51	FEKLKPVHG	7	1054.6	UCH37C88A_DEUBAD_K48 Ub2	120	1058.03	0.148334	2.81176	0.158562	3.62407	0.014623
UCHL5_HUMAN	43	51	FEKLKPVHG	7	1054.6	UCH37C88A_DEUBAD_K48 Ub3	0	1055.22	0.056025	0	0	3.63325	0.023031
UCHL5_HUMAN	43	51	FEKLKPVHG	7	1054.6	UCH37C88A_DEUBAD_K48 Ub3	1	1056.55	0.200525	1.32595	0.208204	3.63198	0.018638
UCHL5_HUMAN	43	51	FEKLKPVHG	7	1054.6	UCH37C88A_DEUBAD_K48 Ub3	10	1057.79	0.13138	2.56763	0.142826	3.64102	0.009116
UCHL5_HUMAN	43	51	FEKLKPVHG	7	1054.6	UCH37C88A_DEUBAD_K48 Ub3	30	1057.96	0.067627	2.7327	0.087819	3.63947	0.008341
UCHL5_HUMAN	43	51	FEKLKPVHG	7	1054.6	UCH37C88A_DEUBAD_K48 Ub3	60	1058	0.011396	2.77476	0.057172	3.63686	0.006891
UCHL5_HUMAN	43	51	FEKLKPVHG	7	1054.6	UCH37C88A_DEUBAD_K48 Ub3	120	1058.04	0.03092	2.81705	0.063991	3.62795	0.005904
UCHL5_HUMAN	43	51	FEKLKPVHG	7	1054.6	UCH37C88A_DEUBAD_K6/48 Ub3	0	1055.22	0.056025	0	0	3.63325	0.023031
UCHL5_HUMAN	43	51	FEKLKPVHG	7	1054.6	UCH37C88A_DEUBAD_K6/48 Ub3	1	1056.36	0	1.13522	0.056025	3.62915	0
UCHL5_HUMAN	43	51	FEKLKPVHG	7	1054.6	UCH37C88A_DEUBAD_K6/48 Ub3	10	1057.67	0.061001	2.44697	0.082825	3.62616	0.011145
UCHL5_HUMAN	43	51	FEKLKPVHG	7	1054.6	UCH37C88A_DEUBAD_K6/48 Ub3	30	1058	0.062585	2.77803	0.083998	3.62791	0.010284
UCHL5_HUMAN	43	51	FEKLKPVHG	7	1054.6	UCH37C88A_DEUBAD_K6/48 Ub3	60	1058.08	0.026941	2.85922	0.062166	3.63376	0.012866
UCHL5_HUMAN	43	51	FEKLKPVHG	7	1054.6	UCH37C88A_DEUBAD_K6/48 Ub3	120	1058.08	0.041954	2.85515	0.069992	3.62711	0.002386
UCHL5_HUMAN	43	51	FEKLKPVHG	7	1054.6	UCH37C88A_DEUBAD_Ub	0	1055.22	0.056025	0	0	3.63325	0.023031
UCHL5_HUMAN	43	51	FEKLKPVHG	7	1054.6	UCH37C88A_DEUBAD_Ub	1	1056.73	0.033189	1.51168	0.065118	3.59809	0.003479
UCHL5_HUMAN	43	51	FEKLKPVHG	7	1054.6	UCH37C88A_DEUBAD_Ub	10	1057.57	0.019258	2.34295	0.059242	3.59107	0.001933
UCHL5_HUMAN	43	51	FEKLKPVHG	7	1054.6	UCH37C88A_DEUBAD_Ub	30	1057.73	0.105736	2.5115	0.119662	3.59603	0.024844
UCHL5_HUMAN	43	51	FEKLKPVHG	7	1054.6	UCH37C88A_DEUBAD_Ub	60	1057.88	0.062255	2.65607	0.083753	3.59845	0.020061
UCHL5_HUMAN	43	51	FEKLKPVHG	7	1054.6	UCH37C88A_DEUBAD_Ub	120	1057.76	0.011949	2.53748	0.057285	3.5873	0.000594
UCHL5_HUMAN	43	52	FEKLKPVHGL	8	1167.69	UCH37C88A_DEUBAD	0	1168.48	0.117996	0	0	4.78428	0.037048
UCHL5_HUMAN	43	52	FEKLKPVHGL	8	1167.69	UCH37C88A_DEUBAD	1	1169.93	0.182054	1.44556	0.216949	4.79647	0.023232
UCHL5_HUMAN	43	52	FEKLKPVHGL	8	1167.69	UCH37C88A_DEUBAD	10	1170.63	0.08609	2.14526	0.146064	4.79366	0.020536
UCHL5_HUMAN	43	52	FEKLKPVHGL	8	1167.69	UCH37C88A_DEUBAD	30	1171.05	0.096966	2.56757	0.152726	4.79481	0.011332
UCHL5_HUMAN	43	52	FEKLKPVHGL	8	1167.69	UCH37C88A_DEUBAD	60	1171.32	0.033082	2.84162	0.122546	4.8044	0.010581
UCHL5_HUMAN	43	52	FEKLKPVHGL	8	1167.69	UCH37C88A_DEUBAD	120	1171.44	0.115509	2.96042	0.165122	4.79448	0.002489
UCHL5_HUMAN	43	52	FEKLKPVHGL	8	1167.69	UCH37C88A_DEUBAD_K48 Ub2	0	1168.48	0.117996	0	0	4.78428	0.037048
UCHL5_HUMAN	43	52	FEKLKPVHGL	8	1167.69	UCH37C88A_DEUBAD_K48 Ub2	1	1170.01	0.021994	1.52896	0.120028	4.78837	0.016583
UCHL5_HUMAN	43	52	FEKLKPVHGL	8	1167.69	UCH37C88A_DEUBAD_K48 Ub2	10	1171.51	0.129955	3.02638	0.175532	4.78388	0.018
UCHL5_HUMAN	43	52	FEKLKPVHGL	8	1167.69	UCH37C88A_DEUBAD_K48 Ub2	30	1171.61	0.035659	3.12804	0.123266	4.78038	0.024611
UCHL5_HUMAN	43	52	FEKLKPVHGL	8	1167.69	UCH37C88A_DEUBAD_K48 Ub2	60	1171.67	0.094688	3.18451	0.15129	4.78481	0.020773
UCHL5_HUMAN	43	52	FEKLKPVHGL	8	1167.69	UCH37C88A_DEUBAD_K48 Ub2	120	1171.56	0.06971	3.07756	0.137049	4.77237	0.018912
UCHL5_HUMAN	43	52	FEKLKPVHGL	8	1167.69	UCH37C88A_DEUBAD_K48 Ub3	0	1168.48	0.117996	0	0	4.78428	0.037048
UCHL5_HUMAN	43	52	FEKLKPVHGL	8	1167.69	UCH37C88A_DEUBAD_K48 Ub3	1	1170.11	0.092359	1.63236	0.149844	4.78585	0.022535
UCHL5_HUMAN	43	52	FEKLKPVHGL	8	1167.69	UCH37C88A_DEUBAD_K48 Ub3	10	1171.45	0.091807	2.96434	0.149505	4.79315	0.012004
UCHL5_HUMAN	43	52	FEKLKPVHGL	8	1167.69	UCH37C88A_DEUBAD_K48 Ub3	30	1171.57	0.138218	3.08835	0.181734	4.79279	0.009913
UCHL5_HUMAN	43	52	FEKLKPVHGL	8	1167.69	UCH37C88A_DEUBAD_K48 Ub3	60	1171.67	0.063572	3.18871	0.134031	4.79004	0.011173
UCHL5_HUMAN	43	52	FEKLKPVHGL	8	1167.69	UCH37C88A_DEUBAD_K48 Ub3	120	1171.66	0.036092	3.18359	0.123392	4.78052	0.008582
UCHL5_HUMAN	43	52	FEKLKPVHGL	8	1167.69	UCH37C88A_DEUBAD_K6/48 Ub3	0	1168.48	0.117996	0	0	4.78428	0.037048
UCHL5_HUMAN	43	52	FEKLKPVHGL	8	1167.69	UCH37C88A_DEUBAD_K6/48 Ub3	1	1169.99	0.104832	1.50904	0.157838	4.79695	0.010737
UCHL5_HUMAN	43	52	FEKLKPVHGL	8	1167.69	UCH37C88A_DEUBAD_K6/48 Ub3	10	1171.42	0.098844	2.93924	0.153926	4.7827	0.017295
UCHL5_HUMAN	43	52	FEKLKPVHGL	8	1167.69	UCH37C88A_DEUBAD_K6/48 Ub3	30	1171.67	0.085733	3.18812	0.145854	4.78438	0.014502
UCHL5_HUMAN	43	52	FEKLKPVHGL	8	1167.69	UCH37C88A_DEUBAD_K6/48 Ub3	60	1171.75	0.091792	3.26947	0.149495	4.78989	0.013708
UCHL5_HUMAN	43	52	FEKLKPVHGL	8	1167.69	UCH37C88A_DEUBAD_K6/48 Ub3	120	1171.84	0.0815	3.36383	0.143406	4.78123	0.004217
UCHL5_HUMAN	43	52	FEKLKPVHGL	8	1167.69	UCH37C88A_DEUBAD_Ub	0	1168.48	0.117996	0	0	4.78428	0.037048
UCHL5_HUMAN	43	52	FEKLKPVHGL	8	1167.69	UCH37C88A_DEUBAD_Ub	1	1170.27	0.084896	1.78874	0.145363	4.73386	0.00874
UCHL5_HUMAN	43	52	FEKLKPVHGL	8	1167.69	UCH37C88A_DEUBAD_Ub	10	1171.38	0.046853	2.90359	0.126958	4.72202	0.005985
UCHL5_HUMAN	43	52	FEKLKPVHGL	8	1167.69	UCH37C88A_DEUBAD_Ub	30	1171.64	0.104022	3.15965	0.157301	4.72021	0.00187
UCHL5_HUMAN	43	52	FEKLKPVHGL	8	1167.69	UCH37C88A_DEUBAD_Ub	60	1171.68	0.090649	3.19637	0.148796	4.74848	0.04162
UCHL5_HUMAN	43	52	FEKLKPVHGL	8	1167.69	UCH37C88A_DEUBAD_Ub	120	1171.65	0.108631	3.1678	0.160386	4.72336	0.004673
UCHL5_HUMAN	43	54	FEKLKPVHGLIF	10	1427.84	UCH37C88A_DEUBAD	0	1429	0.236346	0	0	6.27603	0.058145
UCHL5_HUMAN	43	54	FEKLKPVHGLIF	10	1427.84	UCH37C88A_DEUBAD	1	1430.18	0.16484	1.1722	0.288152	6.27966	0.028312
UCHL5_HUMAN	43	54	FEKLKPVHGLIF	10	1427.84	UCH37C88A_DEUBAD	10	1430.88	0.154444	1.87517	0.282334	6.27873	0.017476
UCHL5_HUMAN	43	54	FEKLKPVHGLIF	10	1427.84	UCH37C88A_DEUBAD	30	1431.27	0.101971	2.26626	0.257406	6.27157	0.018601
UCHL5_HUMAN	43	54	FEKLKPVHGLIF	10	1427.84	UCH37C88A_DEUBAD	60	1431.52	0.075847	2.51748	0.248218	6.28224	0.023567
UCHL5_HUMAN	43	54	FEKLKPVHGLIF	10	1427.84	UCH37C88A_DEUBAD	120	1431.69	0.098257	2.68506	0.255957	6.26855	0.000585
UCHL5_HUMAN	43	54	FEKLKPVHGLIF	10	1427.84	UCH37C88A_DEUBAD_K48 Ub2	0	1429	0.236346	0	0	6.27603	0.058145
UCHL5_HUMAN	43	54	FEKLKPVHGLIF	10	1427.84	UCH37C88A_DEUBAD_K48 Ub2	1	1430.26	0.079617	1.25061	0.249396	6.28482	0.011165
UCHL5_HUMAN	43	54	FEKLKPVHGLIF	10	1427.84	UCH37C88A_DEUBAD_K48 Ub2	10	1431.67	0.13301	2.66471	0.271204	6.26588	0.011974
UCHL5_HUMAN	43	54	FEKLKPVHGLIF	10	1427.84	UCH37C88A_DEUBAD_K48 Ub2	30	1431.81	0.061211	2.80418	0.244144	6.25868	0.026594
UCHL5_HUMAN	43	54	FEKLKPVHGLIF	10	1427.84	UCH37C88A_DEUBAD_K48 Ub2	60	1431.9	0.081665	2.89345	0.250058	6.26208	0.015672
UCHL5_HUMAN	43	54	FEKLKPVHGLIF	10	1427.84	UCH37C88A_DEUBAD_K48 Ub2	120	1431.81	0.12213	2.80908	0.266036	6.24355	0.008446
UCHL5_HUMAN	43	54	FEKLKPVHGLIF	10	1427.84	UCH37C88A_DEUBAD_K48 Ub3	0	1429	0.236346	0	0	6.27603	0.058145
UCHL5_HUMAN	43	54	FEKLKPVHGLIF	10	1427.84	UCH37C88A_DEUBAD_K48 Ub3	1	1430.37	0.103641	1.36587	0.258072	6.28262	0.010807
UCHL5_HUMAN	43	54	FEKLKPVHGLIF	10	1427.84	UCH37C88A_DEUBAD_K48 Ub3	10	1431.64	0.121887	2.63338	0.265925	6.28336	0.010125
UCHL5_HUMAN	43	54	FEKLKPVHGLIF	10	1427.84	UCH37C88A_DEUBAD_K48 Ub3	30	1431.8	0.075674	2.79969	0.248166	6.28292	0.019021
UCHL5_HUMAN	43	54	FEKLKPVHGLIF	10	1427.84	UCH37C88A_DEUBAD_K48 Ub3	60	1431.86	0.083076	2.85909	0.250522	6.2808	0.016551
UCHL5_HUMAN	43	54	FEKLKPVHGLIF	10	1427.84	UCH37C88A_DEUBAD_K48 Ub3	120	1431.89	0.089259	2.88198	0.25264	6.27444	0.019078
UCHL5_HUMAN	43	54	FEKLKPVHGLIF	10	1427.84	UCH37C88A_DEUBAD_K6/48 Ub3	0	1429	0.236346	0	0	6.27603	0.058145
UCHL5_HUMAN	43	54	FEKLKPVHGLIF	10	1427.84	UCH37C88A_DEUBAD_K6/48 Ub3	1	1430.27	0.140552	1.2704	0.274981	6.29343	0.013853
UCHL5_HUMAN	43	54	FEKLKPVHGLIF	10	1427.84	UCH37C88A_DEUBAD_K6/48 Ub3	10	1431.62	0.116262	2.61693	0.263394	6.26845	0.008869
UCHL5_HUMAN	43	54	FEKLKPVHGLIF	10	1427.84	UCH37C88A_DEUBAD_K6/48 Ub3	30	1431.85	0.090126	2.84831	0.252947	6.27184	0.008239
UCHL5_HUMAN	43	54	FEKLKPVHGLIF	10	1427.84	UCH37C88A_DEUBAD_K6/48 Ub3	60	1431.94	0.104323	2.93747	0.258347	6.27662	0.010799
UCHL5_HUMAN	43	54	FEKLKPVHGLIF	10	1427.84	UCH37C88A_DEUBAD_K6/48 Ub3	120	1432.09	0.094728	3.08083	0.254623	6.27115	0.008325
UCHL5_HUMAN	43	54	FEKLKPVHGLIF	10	1427.84	UCH37C88A_DEUBAD_Ub	0	1429	0.236346	0	0	6.27603	0.058145
UCHL5_HUMAN	43	54	FEKLKPVHGLIF	10	1427.84	UCH37C88A_DEUBAD_Ub	1	1430.54	0.218819	1.53213	0.322089	6.17219	0.033895
UCHL5_HUMAN	43	54	FEKLKPVHGLIF	10	1427.84	UCH37C88A_DEUBAD_Ub	10	1431.63	0.187611	2.62255	0.301757	6.17791	0.065854
UCHL5_HUMAN	43	54	FEKLKPVHGLIF	10	1427.84	UCH37C88A_DEUBAD_Ub	30	1431.92	0.216257	2.91781	0.320354	6.2066	0.082678
UCHL5_HUMAN	43	54	FEKLKPVHGLIF	10	1427.84	UCH37C88A_DEUBAD_Ub	60	1431.93	0.220161	2.92989	0.323002	6.18824	0.063465
UCHL5_HUMAN	43	54	FEKLKPVHGLIF	10	1427.84	UCH37C88A_DEUBAD_Ub	120	1432.02	0.253449	3.01284	0.346549	6.1553	0.008783
UCHL5_HUMAN	44	52	EKLKPVHGL	7	1020.62	UCH37C88A_DEUBAD	0	1021.18	0.055806	0	0	3.95887	0.032079
UCHL5_HUMAN	44	52	EKLKPVHGL	7	1020.62	UCH37C88A_DEUBAD	1	1021.97	0.272811	0.78903	0.27846	3.97735	0.014882
UCHL5_HUMAN	44	52	EKLKPVHGL	7	1020.62	UCH37C88A_DEUBAD	10	1022.89	0.182858	1.71348	0.191184	3.96802	0.020283
UCHL5_HUMAN	44	52	EKLKPVHGL	7	1020.62	UCH37C88A_DEUBAD	30	1023.28	0.034994	2.0991	0.06587	3.96812	0.010895
UCHL5_HUMAN	44	52	EKLKPVHGL	7	1020.62	UCH37C88A_DEUBAD	60	1023.52	0.03822	2.33825	0.067639	3.97006	0.010641
UCHL5_HUMAN	44	52	EKLKPVHGL	7	1020.62	UCH37C88A_DEUBAD	120	1023.66	1.13687e-13	2.48454	0.055806	3.97037	0
UCHL5_HUMAN	44	52	EKLKPVHGL	7	1020.62	UCH37C88A_DEUBAD_K48 Ub2	0	1021.18	0.055806	0	0	3.95887	0.032079
UCHL5_HUMAN	44	52	EKLKPVHGL	7	1020.62	UCH37C88A_DEUBAD_K48 Ub2	1	1022.16	0.006661	0.975748	0.056202	3.96272	0.015867
UCHL5_HUMAN	44	52	EKLKPVHGL	7	1020.62	UCH37C88A_DEUBAD_K48 Ub2	10	1023.68	0.197387	2.50087	0.205124	3.95871	0.015019
UCHL5_HUMAN	44	52	EKLKPVHGL	7	1020.62	UCH37C88A_DEUBAD_K48 Ub2	30	1023.75	0.041265	2.57083	0.069405	3.94982	0.022445
UCHL5_HUMAN	44	52	EKLKPVHGL	7	1020.62	UCH37C88A_DEUBAD_K48 Ub2	60	1023.82	0.127059	2.64408	0.138774	3.95356	0.019221
UCHL5_HUMAN	44	52	EKLKPVHGL	7	1020.62	UCH37C88A_DEUBAD_K48 Ub2	120	1023.83	0.064166	2.64697	0.085039	3.9436	0.013086
UCHL5_HUMAN	44	52	EKLKPVHGL	7	1020.62	UCH37C88A_DEUBAD_K48 Ub3	0	1021.18	0.055806	0	0	3.95887	0.032079
UCHL5_HUMAN	44	52	EKLKPVHGL	7	1020.62	UCH37C88A_DEUBAD_K48 Ub3	1	1022.25	0.08838	1.07164	0.104525	3.95745	0.018718
UCHL5_HUMAN	44	52	EKLKPVHGL	7	1020.62	UCH37C88A_DEUBAD_K48 Ub3	10	1023.6	0.131466	2.42041	0.14282	3.96084	0.011918
UCHL5_HUMAN	44	52	EKLKPVHGL	7	1020.62	UCH37C88A_DEUBAD_K48 Ub3	30	1023.7	0.112341	2.5197	0.125439	3.95791	0.014271
UCHL5_HUMAN	44	52	EKLKPVHGL	7	1020.62	UCH37C88A_DEUBAD_K48 Ub3	60	1023.8	0.082381	2.6224	0.099503	3.95749	0.009377
UCHL5_HUMAN	44	52	EKLKPVHGL	7	1020.62	UCH37C88A_DEUBAD_K48 Ub3	120	1023.84	0.067013	2.66112	0.087207	3.94803	0.007481
UCHL5_HUMAN	44	52	EKLKPVHGL	7	1020.62	UCH37C88A_DEUBAD_K6/48 Ub3	0	1021.18	0.055806	0	0	3.95887	0.032079
UCHL5_HUMAN	44	52	EKLKPVHGL	7	1020.62	UCH37C88A_DEUBAD_K6/48 Ub3	1	1022.15	0.072701	0.970182	0.09165	3.96723	0.00939
UCHL5_HUMAN	44	52	EKLKPVHGL	7	1020.62	UCH37C88A_DEUBAD_K6/48 Ub3	10	1023.62	0.138998	2.4358	0.149783	3.95191	0.016968
UCHL5_HUMAN	44	52	EKLKPVHGL	7	1020.62	UCH37C88A_DEUBAD_K6/48 Ub3	30	1023.81	0.102352	2.63027	0.116577	3.95185	0.013606
UCHL5_HUMAN	44	52	EKLKPVHGL	7	1020.62	UCH37C88A_DEUBAD_K6/48 Ub3	60	1023.89	0.092045	2.70633	0.107641	3.95928	0.012347
UCHL5_HUMAN	44	52	EKLKPVHGL	7	1020.62	UCH37C88A_DEUBAD_K6/48 Ub3	120	1023.97	0.063022	2.79511	0.084179	3.9488	0.00168
UCHL5_HUMAN	44	52	EKLKPVHGL	7	1020.62	UCH37C88A_DEUBAD_Ub	0	1021.18	0.055806	0	0	3.95887	0.032079
UCHL5_HUMAN	44	52	EKLKPVHGL	7	1020.62	UCH37C88A_DEUBAD_Ub	1	1022.45	0.033572	1.26846	0.065126	3.87927	0.006699
UCHL5_HUMAN	44	52	EKLKPVHGL	7	1020.62	UCH37C88A_DEUBAD_Ub	10	1023.59	0.088382	2.41025	0.104526	3.88141	0.042894
UCHL5_HUMAN	44	52	EKLKPVHGL	7	1020.62	UCH37C88A_DEUBAD_Ub	30	1023.78	0.033287	2.60236	0.06498	3.88399	0.044655
UCHL5_HUMAN	44	52	EKLKPVHGL	7	1020.62	UCH37C88A_DEUBAD_Ub	60	1023.82	0.083923	2.64002	0.100784	3.88727	0.041592
UCHL5_HUMAN	44	52	EKLKPVHGL	7	1020.62	UCH37C88A_DEUBAD_Ub	120	1023.79	0.119668	2.60783	0.132041	3.86687	0.004369
UCHL5_HUMAN	44	54	EKLKPVHGLIF	9	1280.77	UCH37C88A_DEUBAD	0	1281.66	0.11598	0	0	5.88159	0.065711
UCHL5_HUMAN	44	54	EKLKPVHGLIF	9	1280.77	UCH37C88A_DEUBAD	1	1282.42	0.152993	0.751179	0.191985	5.90621	0.023095
UCHL5_HUMAN	44	54	EKLKPVHGLIF	9	1280.77	UCH37C88A_DEUBAD	10	1283.06	0.135629	1.39604	0.178456	5.89846	0.019664
UCHL5_HUMAN	44	54	EKLKPVHGLIF	9	1280.77	UCH37C88A_DEUBAD	30	1283.46	0.073475	1.79466	0.137295	5.89413	0.016006
UCHL5_HUMAN	44	54	EKLKPVHGLIF	9	1280.77	UCH37C88A_DEUBAD	60	1283.69	0.078027	2.03066	0.139784	5.90307	0.011243
UCHL5_HUMAN	44	54	EKLKPVHGLIF	9	1280.77	UCH37C88A_DEUBAD	120	1283.85	0.046529	2.18644	0.124965	5.89954	0.001221
UCHL5_HUMAN	44	54	EKLKPVHGLIF	9	1280.77	UCH37C88A_DEUBAD_K48 Ub2	0	1281.66	0.11598	0	0	5.88159	0.065711
UCHL5_HUMAN	44	54	EKLKPVHGLIF	9	1280.77	UCH37C88A_DEUBAD_K48 Ub2	1	1282.49	0.051178	0.828011	0.126769	5.90545	0.00134
UCHL5_HUMAN	44	54	EKLKPVHGLIF	9	1280.77	UCH37C88A_DEUBAD_K48 Ub2	10	1283.84	0.148384	2.17528	0.188332	5.88954	0.007079
UCHL5_HUMAN	44	54	EKLKPVHGLIF	9	1280.77	UCH37C88A_DEUBAD_K48 Ub2	30	1283.95	0.058874	2.28632	0.130067	5.88414	0.021796
UCHL5_HUMAN	44	54	EKLKPVHGLIF	9	1280.77	UCH37C88A_DEUBAD_K48 Ub2	60	1284.04	0.060938	2.38033	0.131014	5.89021	0.014796
UCHL5_HUMAN	44	54	EKLKPVHGLIF	9	1280.77	UCH37C88A_DEUBAD_K48 Ub2	120	1283.95	0.087631	2.2847	0.145364	5.87718	0.014054
UCHL5_HUMAN	44	54	EKLKPVHGLIF	9	1280.77	UCH37C88A_DEUBAD_K48 Ub3	0	1281.66	0.11598	0	0	5.88159	0.065711
UCHL5_HUMAN	44	54	EKLKPVHGLIF	9	1280.77	UCH37C88A_DEUBAD_K48 Ub3	1	1282.61	0.050158	0.941542	0.126361	5.90522	0.011759
UCHL5_HUMAN	44	54	EKLKPVHGLIF	9	1280.77	UCH37C88A_DEUBAD_K48 Ub3	10	1283.8	0.104473	2.13112	0.156096	5.90599	0.009083
UCHL5_HUMAN	44	54	EKLKPVHGLIF	9	1280.77	UCH37C88A_DEUBAD_K48 Ub3	30	1283.93	0.082691	2.26328	0.14244	5.90336	0.012738
UCHL5_HUMAN	44	54	EKLKPVHGLIF	9	1280.77	UCH37C88A_DEUBAD_K48 Ub3	60	1284.01	0.059029	2.3477	0.130137	5.90384	0.00971
UCHL5_HUMAN	44	54	EKLKPVHGLIF	9	1280.77	UCH37C88A_DEUBAD_K48 Ub3	120	1284.06	0.070936	2.39281	0.135953	5.89638	0.015928
UCHL5_HUMAN	44	54	EKLKPVHGLIF	9	1280.77	UCH37C88A_DEUBAD_K6/48 Ub3	0	1281.66	0.11598	0	0	5.88159	0.065711
UCHL5_HUMAN	44	54	EKLKPVHGLIF	9	1280.77	UCH37C88A_DEUBAD_K6/48 Ub3	1	1282.48	0.088885	0.818622	0.146123	5.91374	0.015847
UCHL5_HUMAN	44	54	EKLKPVHGLIF	9	1280.77	UCH37C88A_DEUBAD_K6/48 Ub3	10	1283.79	0.094259	2.12517	0.149452	5.8924	0.008849
UCHL5_HUMAN	44	54	EKLKPVHGLIF	9	1280.77	UCH37C88A_DEUBAD_K6/48 Ub3	30	1284.02	0.067196	2.35318	0.13404	5.89255	0.009156
UCHL5_HUMAN	44	54	EKLKPVHGLIF	9	1280.77	UCH37C88A_DEUBAD_K6/48 Ub3	60	1284.1	0.120912	2.43595	0.167544	5.89628	0.012008
UCHL5_HUMAN	44	54	EKLKPVHGLIF	9	1280.77	UCH37C88A_DEUBAD_K6/48 Ub3	120	1284.27	0.050941	2.60565	0.126674	5.89563	0.007317
UCHL5_HUMAN	44	54	EKLKPVHGLIF	9	1280.77	UCH37C88A_DEUBAD_Ub	0	1281.66	0.11598	0	0	5.88159	0.065711
UCHL5_HUMAN	44	54	EKLKPVHGLIF	9	1280.77	UCH37C88A_DEUBAD_Ub	1	1282.82	0.135264	1.15818	0.178179	5.76548	0.009349
UCHL5_HUMAN	44	54	EKLKPVHGLIF	9	1280.77	UCH37C88A_DEUBAD_Ub	10	1283.79	0.693039	2.12264	0.702677	5.74676	0.005141
UCHL5_HUMAN	44	54	EKLKPVHGLIF	9	1280.77	UCH37C88A_DEUBAD_Ub	30	1284.09	0.099954	2.42744	0.153108	5.82602	0.093983
UCHL5_HUMAN	44	54	EKLKPVHGLIF	9	1280.77	UCH37C88A_DEUBAD_Ub	60	1283.99	0.041029	2.32451	0.123023	5.7602	0.006406
UCHL5_HUMAN	44	54	EKLKPVHGLIF	9	1280.77	UCH37C88A_DEUBAD_Ub	120	1284.19	0.234602	2.52867	0.261705	5.75105	0.004339
UCHL5_HUMAN	44	55	EKLKPVHGLIFL	10	1393.86	UCH37C88A_DEUBAD	0	1394.91	0.179737	0	0	6.621	0.044227
UCHL5_HUMAN	44	55	EKLKPVHGLIFL	10	1393.86	UCH37C88A_DEUBAD	1	1395.63	0.271952	0.726096	0.32598	6.61176	0.033875
UCHL5_HUMAN	44	55	EKLKPVHGLIFL	10	1393.86	UCH37C88A_DEUBAD	10	1396.24	0.20066	1.33642	0.269388	6.61229	0.027066
UCHL5_HUMAN	44	55	EKLKPVHGLIFL	10	1393.86	UCH37C88A_DEUBAD	30	1396.61	0.111277	1.70144	0.211395	6.60894	0.019321
UCHL5_HUMAN	44	55	EKLKPVHGLIFL	10	1393.86	UCH37C88A_DEUBAD	60	1396.88	0.146935	1.97816	0.232153	6.61165	0.018679
UCHL5_HUMAN	44	55	EKLKPVHGLIFL	10	1393.86	UCH37C88A_DEUBAD	120	1397.01	0.100019	2.10556	0.205692	6.60568	0.000487
UCHL5_HUMAN	44	55	EKLKPVHGLIFL	10	1393.86	UCH37C88A_DEUBAD_K48 Ub2	0	1394.91	0.179737	0	0	6.621	0.044227
UCHL5_HUMAN	44	55	EKLKPVHGLIFL	10	1393.86	UCH37C88A_DEUBAD_K48 Ub2	1	1395.63	0.094186	0.724607	0.202919	6.60687	0.005763
UCHL5_HUMAN	44	55	EKLKPVHGLIFL	10	1393.86	UCH37C88A_DEUBAD_K48 Ub2	10	1396.86	0.138998	1.95579	0.227213	6.59633	0.014483
UCHL5_HUMAN	44	55	EKLKPVHGLIFL	10	1393.86	UCH37C88A_DEUBAD_K48 Ub2	30	1397	0.030091	2.09448	0.182238	6.59447	0.019114
UCHL5_HUMAN	44	55	EKLKPVHGLIFL	10	1393.86	UCH37C88A_DEUBAD_K48 Ub2	60	1397.12	0.023278	2.21447	0.181238	6.59217	0.015096
UCHL5_HUMAN	44	55	EKLKPVHGLIFL	10	1393.86	UCH37C88A_DEUBAD_K48 Ub2	120	1397.04	0.05514	2.13238	0.188004	6.58045	0.005903
UCHL5_HUMAN	44	55	EKLKPVHGLIFL	10	1393.86	UCH37C88A_DEUBAD_K48 Ub3	0	1394.91	0.179737	0	0	6.621	0.044227
UCHL5_HUMAN	44	55	EKLKPVHGLIFL	10	1393.86	UCH37C88A_DEUBAD_K48 Ub3	1	1395.94	0.010762	1.03506	0.180058	6.60049	0.028634
UCHL5_HUMAN	44	55	EKLKPVHGLIFL	10	1393.86	UCH37C88A_DEUBAD_K48 Ub3	10	1396.93	0.123163	2.01987	0.217886	6.61378	0.015966
UCHL5_HUMAN	44	55	EKLKPVHGLIFL	10	1393.86	UCH37C88A_DEUBAD_K48 Ub3	30	1397.25	0.057942	2.34076	0.188845	6.61052	0.012404
UCHL5_HUMAN	44	55	EKLKPVHGLIFL	10	1393.86	UCH37C88A_DEUBAD_K48 Ub3	60	1397.26	0.115309	2.35678	0.213545	6.61103	0.015819
UCHL5_HUMAN	44	55	EKLKPVHGLIFL	10	1393.86	UCH37C88A_DEUBAD_K48 Ub3	120	1397.37	0.100933	2.45985	0.206137	6.61036	0.020547
UCHL5_HUMAN	44	55	EKLKPVHGLIFL	10	1393.86	UCH37C88A_DEUBAD_K6/48 Ub3	0	1394.91	0.179737	0	0	6.621	0.044227
UCHL5_HUMAN	44	55	EKLKPVHGLIFL	10	1393.86	UCH37C88A_DEUBAD_K6/48 Ub3	1	1395.89	0.104756	0.982438	0.208036	6.62342	0.015078
UCHL5_HUMAN	44	55	EKLKPVHGLIFL	10	1393.86	UCH37C88A_DEUBAD_K6/48 Ub3	10	1397.1	0.108504	2.19798	0.209948	6.59706	0.007185
UCHL5_HUMAN	44	55	EKLKPVHGLIFL	10	1393.86	UCH37C88A_DEUBAD_K6/48 Ub3	30	1397.26	0.168827	2.35328	0.246592	6.59617	0.015312
UCHL5_HUMAN	44	55	EKLKPVHGLIFL	10	1393.86	UCH37C88A_DEUBAD_K6/48 Ub3	60	1397.43	0.188481	2.51858	0.260442	6.59753	0.008789
UCHL5_HUMAN	44	55	EKLKPVHGLIFL	10	1393.86	UCH37C88A_DEUBAD_K6/48 Ub3	120	1397.65	0.094321	2.74591	0.202982	6.60123	0.000157
UCHL5_HUMAN	44	55	EKLKPVHGLIFL	10	1393.86	UCH37C88A_DEUBAD_Ub	0	1394.91	0.179737	0	0	6.621	0.044227
UCHL5_HUMAN	44	55	EKLKPVHGLIFL	10	1393.86	UCH37C88A_DEUBAD_Ub	1	1395.69	0.041151	0.78097	0.184387	6.46221	0.006319
UCHL5_HUMAN	44	55	EKLKPVHGLIFL	10	1393.86	UCH37C88A_DEUBAD_Ub	10	1396.89	0.0502	1.98085	0.186615	6.50376	0.082097
UCHL5_HUMAN	44	55	EKLKPVHGLIFL	10	1393.86	UCH37C88A_DEUBAD_Ub	30	1397.11	0.073703	2.20195	0.194261	6.5063	0.08639
UCHL5_HUMAN	44	55	EKLKPVHGLIFL	10	1393.86	UCH37C88A_DEUBAD_Ub	60	1397.13	0.136259	2.21935	0.225548	6.50427	0.075704
UCHL5_HUMAN	44	55	EKLKPVHGLIFL	10	1393.86	UCH37C88A_DEUBAD_Ub	120	1397.22	0.234561	2.31649	0.295506	6.45533	0.004621
UCHL5_HUMAN	55	67	LFKWQPGEEPAGS	10	1445.71	UCH37C88A_DEUBAD	0	1446.59	0.067804	0	0	5.92606	0.041492
UCHL5_HUMAN	55	67	LFKWQPGEEPAGS	10	1445.71	UCH37C88A_DEUBAD	1	1451.76	0.061822	5.17305	0.091757	5.92229	0.02555
UCHL5_HUMAN	55	67	LFKWQPGEEPAGS	10	1445.71	UCH37C88A_DEUBAD	10	1452.29	0.038352	5.69724	0.077899	5.92234	0.022769
UCHL5_HUMAN	55	67	LFKWQPGEEPAGS	10	1445.71	UCH37C88A_DEUBAD	30	1452.37	0.027598	5.7806	0.073205	5.91426	0.022716
UCHL5_HUMAN	55	67	LFKWQPGEEPAGS	10	1445.71	UCH37C88A_DEUBAD	60	1452.43	0.03968	5.8393	0.078562	5.92167	0.018612
UCHL5_HUMAN	55	67	LFKWQPGEEPAGS	10	1445.71	UCH37C88A_DEUBAD	120	1452.36	0	5.77035	0.067804	5.91923	0
UCHL5_HUMAN	55	67	LFKWQPGEEPAGS	10	1445.71	UCH37C88A_DEUBAD_K48 Ub2	0	1446.59	0.067804	0	0	5.92606	0.041492
UCHL5_HUMAN	55	67	LFKWQPGEEPAGS	10	1445.71	UCH37C88A_DEUBAD_K48 Ub2	1	1450.56	0.004378	3.9725	0.067945	5.92286	0.013123
UCHL5_HUMAN	55	67	LFKWQPGEEPAGS	10	1445.71	UCH37C88A_DEUBAD_K48 Ub2	10	1451.06	0.157784	4.47001	0.171736	5.91602	0.012871
UCHL5_HUMAN	55	67	LFKWQPGEEPAGS	10	1445.71	UCH37C88A_DEUBAD_K48 Ub2	30	1451.31	0.026428	4.71715	0.072773	5.90674	0.025589
UCHL5_HUMAN	55	67	LFKWQPGEEPAGS	10	1445.71	UCH37C88A_DEUBAD_K48 Ub2	60	1451.49	0.063788	4.89461	0.093093	5.91381	0.018777
UCHL5_HUMAN	55	67	LFKWQPGEEPAGS	10	1445.71	UCH37C88A_DEUBAD_K48 Ub2	120	1451.57	0.048115	4.97645	0.083141	5.89796	0.013599
UCHL5_HUMAN	55	67	LFKWQPGEEPAGS	10	1445.71	UCH37C88A_DEUBAD_K48 Ub3	0	1446.59	0.0618	0	0	5.92624	0.041494
UCHL5_HUMAN	55	67	LFKWQPGEEPAGS	10	1445.71	UCH37C88A_DEUBAD_K48 Ub3	1	1450.6	0.13926	4.00697	0.152357	5.92476	0.014112
UCHL5_HUMAN	55	67	LFKWQPGEEPAGS	10	1445.71	UCH37C88A_DEUBAD_K48 Ub3	10	1451.03	0.089494	4.44267	0.108759	5.92714	0.007395
UCHL5_HUMAN	55	67	LFKWQPGEEPAGS	10	1445.71	UCH37C88A_DEUBAD_K48 Ub3	30	1451.26	0.020309	4.66534	0.065051	5.92992	0.011363
UCHL5_HUMAN	55	67	LFKWQPGEEPAGS	10	1445.71	UCH37C88A_DEUBAD_K48 Ub3	60	1451.47	0.022163	4.8789	0.065654	5.93034	0.01037
UCHL5_HUMAN	55	67	LFKWQPGEEPAGS	10	1445.71	UCH37C88A_DEUBAD_K48 Ub3	120	1451.63	0.048021	5.04155	0.078264	5.92285	0.017748
UCHL5_HUMAN	55	67	LFKWQPGEEPAGS	10	1445.71	UCH37C88A_DEUBAD_K6/48 Ub3	0	1446.59	0.067804	0	0	5.92606	0.041492
UCHL5_HUMAN	55	67	LFKWQPGEEPAGS	10	1445.71	UCH37C88A_DEUBAD_K6/48 Ub3	1	1450.64	0.05894	4.05204	0.089841	5.93039	0.008343
UCHL5_HUMAN	55	67	LFKWQPGEEPAGS	10	1445.71	UCH37C88A_DEUBAD_K6/48 Ub3	10	1451.17	0.117562	4.58076	0.135714	5.90845	0.001474
UCHL5_HUMAN	55	67	LFKWQPGEEPAGS	10	1445.71	UCH37C88A_DEUBAD_K6/48 Ub3	30	1451.59	0.196402	4.99509	0.207777	5.91046	0.003613
UCHL5_HUMAN	55	67	LFKWQPGEEPAGS	10	1445.71	UCH37C88A_DEUBAD_K6/48 Ub3	60	1451.82	0.188756	5.22692	0.200565	5.9147	0.010826
UCHL5_HUMAN	55	67	LFKWQPGEEPAGS	10	1445.71	UCH37C88A_DEUBAD_K6/48 Ub3	120	1451.91	0.133421	5.31977	0.149662	5.91256	0.002882
UCHL5_HUMAN	55	67	LFKWQPGEEPAGS	10	1445.71	UCH37C88A_DEUBAD_Ub	0	1446.59	0.0618	0	0	5.92624	0.041494
UCHL5_HUMAN	55	67	LFKWQPGEEPAGS	10	1445.71	UCH37C88A_DEUBAD_Ub	1	1450.44	0.170496	3.8459	0.181351	5.85524	0.04143
UCHL5_HUMAN	55	67	LFKWQPGEEPAGS	10	1445.71	UCH37C88A_DEUBAD_Ub	10	1450.93	0.116093	4.33785	0.131517	5.85022	0.044733
UCHL5_HUMAN	55	67	LFKWQPGEEPAGS	10	1445.71	UCH37C88A_DEUBAD_Ub	30	1451.37	0.079244	4.78162	0.100493	5.85199	0.046058
UCHL5_HUMAN	55	67	LFKWQPGEEPAGS	10	1445.71	UCH37C88A_DEUBAD_Ub	60	1451.45	0.110454	4.85731	0.126567	5.85132	0.0411
UCHL5_HUMAN	55	67	LFKWQPGEEPAGS	10	1445.71	UCH37C88A_DEUBAD_Ub	120	1451.47	0.063653	4.88214	0.088718	5.82898	0.003188
UCHL5_HUMAN	55	68	LFKWQPGEEPAGSV	11	1544.77	UCH37C88A_DEUBAD	0	1545.58	0.019089	0	0	6.26241	0.033588
UCHL5_HUMAN	55	68	LFKWQPGEEPAGSV	11	1544.77	UCH37C88A_DEUBAD	1	1551.64	0.000833	6.05203	0.019107	6.26528	0.026252
UCHL5_HUMAN	55	68	LFKWQPGEEPAGSV	11	1544.77	UCH37C88A_DEUBAD	10	1552.2	0.024353	6.62044	0.030943	6.26669	0.024467
UCHL5_HUMAN	55	68	LFKWQPGEEPAGSV	11	1544.77	UCH37C88A_DEUBAD	30	1552.26	0.086985	6.67418	0.089055	6.25842	0.022015
UCHL5_HUMAN	55	68	LFKWQPGEEPAGSV	11	1544.77	UCH37C88A_DEUBAD	60	1552.33	0.080388	6.74123	0.082623	6.26228	0.023441
UCHL5_HUMAN	55	68	LFKWQPGEEPAGSV	11	1544.77	UCH37C88A_DEUBAD	120	1552.23	0	6.64719	0.019089	6.24809	0
UCHL5_HUMAN	55	68	LFKWQPGEEPAGSV	11	1544.77	UCH37C88A_DEUBAD_K48 Ub2	0	1545.58	0.019089	0	0	6.26241	0.033588
UCHL5_HUMAN	55	68	LFKWQPGEEPAGSV	11	1544.77	UCH37C88A_DEUBAD_K48 Ub2	1	1550.45	0.043739	4.86821	0.047723	6.26485	0.01768
UCHL5_HUMAN	55	68	LFKWQPGEEPAGSV	11	1544.77	UCH37C88A_DEUBAD_K48 Ub2	10	1550.89	0.081366	5.30867	0.083575	6.2591	0.014377
UCHL5_HUMAN	55	68	LFKWQPGEEPAGSV	11	1544.77	UCH37C88A_DEUBAD_K48 Ub2	30	1551.17	0.087366	5.58772	0.089427	6.25283	0.023096
UCHL5_HUMAN	55	68	LFKWQPGEEPAGSV	11	1544.77	UCH37C88A_DEUBAD_K48 Ub2	60	1551.38	0.047991	5.79882	0.051648	6.25596	0.016115
UCHL5_HUMAN	55	68	LFKWQPGEEPAGSV	11	1544.77	UCH37C88A_DEUBAD_K48 Ub2	120	1551.49	0.135785	5.90356	0.13712	6.24095	0.00352
UCHL5_HUMAN	55	68	LFKWQPGEEPAGSV	11	1544.77	UCH37C88A_DEUBAD_K48 Ub3	0	1545.58	0.019089	0	0	6.26241	0.033588
UCHL5_HUMAN	55	68	LFKWQPGEEPAGSV	11	1544.77	UCH37C88A_DEUBAD_K48 Ub3	1	1550.5	0.094576	4.91985	0.096483	6.26867	0.011362
UCHL5_HUMAN	55	68	LFKWQPGEEPAGSV	11	1544.77	UCH37C88A_DEUBAD_K48 Ub3	10	1550.83	0.13943	5.24561	0.14073	6.27881	0.014999
UCHL5_HUMAN	55	68	LFKWQPGEEPAGSV	11	1544.77	UCH37C88A_DEUBAD_K48 Ub3	30	1551.18	0.024315	5.59111	0.030913	6.28032	0.016047
UCHL5_HUMAN	55	68	LFKWQPGEEPAGSV	11	1544.77	UCH37C88A_DEUBAD_K48 Ub3	60	1551.44	0.023845	5.85492	0.030544	6.28064	0.017991
UCHL5_HUMAN	55	68	LFKWQPGEEPAGSV	11	1544.77	UCH37C88A_DEUBAD_K48 Ub3	120	1551.48	0.042801	5.89409	0.046865	6.27244	0.018977
UCHL5_HUMAN	55	68	LFKWQPGEEPAGSV	11	1544.77	UCH37C88A_DEUBAD_K6/48 Ub3	0	1545.58	0.019089	0	0	6.26241	0.033588
UCHL5_HUMAN	55	68	LFKWQPGEEPAGSV	11	1544.77	UCH37C88A_DEUBAD_K6/48 Ub3	1	1550.63	0.204933	5.04055	0.20582	6.27846	0.001914
UCHL5_HUMAN	55	68	LFKWQPGEEPAGSV	11	1544.77	UCH37C88A_DEUBAD_K6/48 Ub3	10	1551.06	0.154689	5.47147	0.155862	6.25514	0.002753
UCHL5_HUMAN	55	68	LFKWQPGEEPAGSV	11	1544.77	UCH37C88A_DEUBAD_K6/48 Ub3	30	1551.58	0.344184	5.99143	0.344713	6.26234	0.010021
UCHL5_HUMAN	55	68	LFKWQPGEEPAGSV	11	1544.77	UCH37C88A_DEUBAD_K6/48 Ub3	60	1551.74	0.203168	6.15401	0.204063	6.25027	0.002067
UCHL5_HUMAN	55	68	LFKWQPGEEPAGSV	11	1544.77	UCH37C88A_DEUBAD_K6/48 Ub3	120	1551.83	0.147931	6.24064	0.149158	6.2573	0.009247
UCHL5_HUMAN	55	68	LFKWQPGEEPAGSV	11	1544.77	UCH37C88A_DEUBAD_Ub	0	1545.58	0.019089	0	0	6.26241	0.033588
UCHL5_HUMAN	55	68	LFKWQPGEEPAGSV	11	1544.77	UCH37C88A_DEUBAD_Ub	1	1550.38	0.099072	4.79606	0.100894	6.18272	0.01956
UCHL5_HUMAN	55	68	LFKWQPGEEPAGSV	11	1544.77	UCH37C88A_DEUBAD_Ub	10	1550.79	0.196812	5.20933	0.197736	6.17969	0.02004
UCHL5_HUMAN	55	68	LFKWQPGEEPAGSV	11	1544.77	UCH37C88A_DEUBAD_Ub	30	1551.16	0.20165	5.57921	0.202551	6.17804	0.022151
UCHL5_HUMAN	55	68	LFKWQPGEEPAGSV	11	1544.77	UCH37C88A_DEUBAD_Ub	60	1551.28	0.133148	5.69341	0.13451	6.18117	0.018492
UCHL5_HUMAN	55	68	LFKWQPGEEPAGSV	11	1544.77	UCH37C88A_DEUBAD_Ub	120	1551.41	0.086427	5.82182	0.08851	6.17546	0.003147
UCHL5_HUMAN	55	71	LFKWQPGEEPAGSVVQD	14	1886.93	UCH37C88A_DEUBAD	0	1887.99	0.037829	0	0	6.17336	0.039916
UCHL5_HUMAN	55	71	LFKWQPGEEPAGSVVQD	14	1886.93	UCH37C88A_DEUBAD	1	1895.62	0.248406	7.63729	0.25127	6.17571	0.024764
UCHL5_HUMAN	55	71	LFKWQPGEEPAGSVVQD	14	1886.93	UCH37C88A_DEUBAD	10	1896.36	0.221821	8.37609	0.225024	6.17758	0.021059
UCHL5_HUMAN	55	71	LFKWQPGEEPAGSVVQD	14	1886.93	UCH37C88A_DEUBAD	30	1896.47	0.236592	8.48307	0.239597	6.16905	0.02119
UCHL5_HUMAN	55	71	LFKWQPGEEPAGSVVQD	14	1886.93	UCH37C88A_DEUBAD	60	1896.51	0.232169	8.52517	0.235231	6.17298	0.020775
UCHL5_HUMAN	55	71	LFKWQPGEEPAGSVVQD	14	1886.93	UCH37C88A_DEUBAD	120	1896.43	0.23359	8.44732	0.236633	6.16189	0.002751
UCHL5_HUMAN	55	71	LFKWQPGEEPAGSVVQD	14	1886.93	UCH37C88A_DEUBAD_K48 Ub2	0	1887.99	0.037829	0	0	6.17336	0.039916
UCHL5_HUMAN	55	71	LFKWQPGEEPAGSVVQD	14	1886.93	UCH37C88A_DEUBAD_K48 Ub2	1	1893.99	0.149242	6.00241	0.153961	6.17547	0.017436
UCHL5_HUMAN	55	71	LFKWQPGEEPAGSVVQD	14	1886.93	UCH37C88A_DEUBAD_K48 Ub2	10	1894.81	0.316024	6.82139	0.31828	6.17203	0.012963
UCHL5_HUMAN	55	71	LFKWQPGEEPAGSVVQD	14	1886.93	UCH37C88A_DEUBAD_K48 Ub2	30	1895.26	0.194066	7.26807	0.197718	6.17096	0.018874
UCHL5_HUMAN	55	71	LFKWQPGEEPAGSVVQD	14	1886.93	UCH37C88A_DEUBAD_K48 Ub2	60	1895.64	0.170853	7.65006	0.174991	6.1686	0.017341
UCHL5_HUMAN	55	71	LFKWQPGEEPAGSVVQD	14	1886.93	UCH37C88A_DEUBAD_K48 Ub2	120	1895.69	0.170262	7.70597	0.174414	6.15456	0.009316
UCHL5_HUMAN	55	71	LFKWQPGEEPAGSVVQD	14	1886.93	UCH37C88A_DEUBAD_K48 Ub3	0	1887.99	0.037829	0	0	6.17336	0.039916
UCHL5_HUMAN	55	71	LFKWQPGEEPAGSVVQD	14	1886.93	UCH37C88A_DEUBAD_K48 Ub3	1	1894.05	0.321703	6.06091	0.323919	6.18398	0.017757
UCHL5_HUMAN	55	71	LFKWQPGEEPAGSVVQD	14	1886.93	UCH37C88A_DEUBAD_K48 Ub3	10	1894.55	0.227686	6.56571	0.230807	6.1846	0.006751
UCHL5_HUMAN	55	71	LFKWQPGEEPAGSVVQD	14	1886.93	UCH37C88A_DEUBAD_K48 Ub3	30	1894.96	0.214705	6.97241	0.218012	6.18879	0.014066
UCHL5_HUMAN	55	71	LFKWQPGEEPAGSVVQD	14	1886.93	UCH37C88A_DEUBAD_K48 Ub3	60	1895.63	0.50839	7.64036	0.509795	6.18864	0.014111
UCHL5_HUMAN	55	71	LFKWQPGEEPAGSVVQD	14	1886.93	UCH37C88A_DEUBAD_K48 Ub3	120	1895.63	0.181972	7.63983	0.185862	6.1805	0.019349
UCHL5_HUMAN	55	71	LFKWQPGEEPAGSVVQD	14	1886.93	UCH37C88A_DEUBAD_K6/48 Ub3	0	1887.99	0.037829	0	0	6.17336	0.039916
UCHL5_HUMAN	55	71	LFKWQPGEEPAGSVVQD	14	1886.93	UCH37C88A_DEUBAD_K6/48 Ub3	1	1894.3	0.294043	6.31532	0.296466	6.18621	0.008353
UCHL5_HUMAN	55	71	LFKWQPGEEPAGSVVQD	14	1886.93	UCH37C88A_DEUBAD_K6/48 Ub3	10	1894.96	0.260658	6.97126	0.263389	6.16478	0.00433
UCHL5_HUMAN	55	71	LFKWQPGEEPAGSVVQD	14	1886.93	UCH37C88A_DEUBAD_K6/48 Ub3	30	1895.65	0.295515	7.66603	0.297926	6.16698	0.003888
UCHL5_HUMAN	55	71	LFKWQPGEEPAGSVVQD	14	1886.93	UCH37C88A_DEUBAD_K6/48 Ub3	60	1896.07	0.428593	8.08466	0.430259	6.1756	0.014086
UCHL5_HUMAN	55	71	LFKWQPGEEPAGSVVQD	14	1886.93	UCH37C88A_DEUBAD_K6/48 Ub3	120	1896.04	0.2311	8.0511	0.234175	6.16902	0.007479
UCHL5_HUMAN	55	71	LFKWQPGEEPAGSVVQD	14	1886.93	UCH37C88A_DEUBAD_Ub	0	1887.99	0.037829	0	0	6.17336	0.039916
UCHL5_HUMAN	55	71	LFKWQPGEEPAGSVVQD	14	1886.93	UCH37C88A_DEUBAD_Ub	1	1893.85	0.258708	5.86611	0.261459	6.12277	0.023231
UCHL5_HUMAN	55	71	LFKWQPGEEPAGSVVQD	14	1886.93	UCH37C88A_DEUBAD_Ub	10	1894.47	0.330896	6.47866	0.333051	6.11844	0.026093
UCHL5_HUMAN	55	71	LFKWQPGEEPAGSVVQD	14	1886.93	UCH37C88A_DEUBAD_Ub	30	1895.18	0.29085	7.19109	0.2933	6.11835	0.028558
UCHL5_HUMAN	55	71	LFKWQPGEEPAGSVVQD	14	1886.93	UCH37C88A_DEUBAD_Ub	60	1895.27	0.288106	7.2781	0.290579	6.12177	0.023333
UCHL5_HUMAN	55	71	LFKWQPGEEPAGSVVQD	14	1886.93	UCH37C88A_DEUBAD_Ub	120	1895.37	0.263989	7.38706	0.266686	6.11126	0.00617
UCHL5_HUMAN	56	67	FKWQPGEEPAGS	9	1332.62	UCH37C88A_DEUBAD	0	1333.57	0.034474	0	0	5.41006	0.048079
UCHL5_HUMAN	56	67	FKWQPGEEPAGS	9	1332.62	UCH37C88A_DEUBAD	1	1338.32	0.047979	4.75544	0.05908	5.39994	0.023761
UCHL5_HUMAN	56	67	FKWQPGEEPAGS	9	1332.62	UCH37C88A_DEUBAD	10	1338.54	0.045173	4.96576	0.056825	5.40016	0.019544
UCHL5_HUMAN	56	67	FKWQPGEEPAGS	9	1332.62	UCH37C88A_DEUBAD	30	1338.57	0.05063	4.99625	0.061253	5.43785	0.045566
UCHL5_HUMAN	56	67	FKWQPGEEPAGS	9	1332.62	UCH37C88A_DEUBAD	60	1338.63	0.030561	5.05803	0.04607	5.40155	0.014141
UCHL5_HUMAN	56	67	FKWQPGEEPAGS	9	1332.62	UCH37C88A_DEUBAD	120	1338.53	0	4.95955	0.034474	5.39931	0
UCHL5_HUMAN	56	67	FKWQPGEEPAGS	9	1332.62	UCH37C88A_DEUBAD_K48 Ub2	0	1333.57	0.038767	0	0	5.41009	0.04804
UCHL5_HUMAN	56	67	FKWQPGEEPAGS	9	1332.62	UCH37C88A_DEUBAD_K48 Ub2	1	1337.49	0.047989	3.92331	0.061691	5.41804	0.045925
UCHL5_HUMAN	56	67	FKWQPGEEPAGS	9	1332.62	UCH37C88A_DEUBAD_K48 Ub2	10	1337.97	0.084295	4.40213	0.092783	5.39889	0.031339
UCHL5_HUMAN	56	67	FKWQPGEEPAGS	9	1332.62	UCH37C88A_DEUBAD_K48 Ub2	30	1338.16	0.051598	4.58717	0.064539	5.40774	0.028186
UCHL5_HUMAN	56	67	FKWQPGEEPAGS	9	1332.62	UCH37C88A_DEUBAD_K48 Ub2	60	1338.3	0.070497	4.73113	0.080454	5.40102	0.030477
UCHL5_HUMAN	56	67	FKWQPGEEPAGS	9	1332.62	UCH37C88A_DEUBAD_K48 Ub2	120	1338.41	0.070645	4.83916	0.080583	5.39735	0.037678
UCHL5_HUMAN	56	67	FKWQPGEEPAGS	9	1332.62	UCH37C88A_DEUBAD_K48 Ub3	0	1333.57	0.034474	0	0	5.41006	0.048079
UCHL5_HUMAN	56	67	FKWQPGEEPAGS	9	1332.62	UCH37C88A_DEUBAD_K48 Ub3	1	1337.53	0.141788	3.95697	0.145919	5.39726	0.034084
UCHL5_HUMAN	56	67	FKWQPGEEPAGS	9	1332.62	UCH37C88A_DEUBAD_K48 Ub3	10	1337.84	0.008885	4.27184	0.035601	5.38986	0.033491
UCHL5_HUMAN	56	67	FKWQPGEEPAGS	9	1332.62	UCH37C88A_DEUBAD_K48 Ub3	30	1338.19	0.174568	4.62009	0.177939	5.39959	0.027742
UCHL5_HUMAN	56	67	FKWQPGEEPAGS	9	1332.62	UCH37C88A_DEUBAD_K48 Ub3	60	1338.25	0.015525	4.68475	0.037809	5.39077	0.033785
UCHL5_HUMAN	56	67	FKWQPGEEPAGS	9	1332.62	UCH37C88A_DEUBAD_K48 Ub3	120	1338.31	0.031185	4.74355	0.046486	5.42009	0.05468
UCHL5_HUMAN	56	67	FKWQPGEEPAGS	9	1332.62	UCH37C88A_DEUBAD_K6/48 Ub3	0	1333.54	0.007646	0	0	5.45592	0.003906
UCHL5_HUMAN	56	67	FKWQPGEEPAGS	9	1332.62	UCH37C88A_DEUBAD_K6/48 Ub3	1	1337.63	0.169027	4.09676	0.1692	5.39831	0.011654
UCHL5_HUMAN	56	67	FKWQPGEEPAGS	9	1332.62	UCH37C88A_DEUBAD_K6/48 Ub3	10	1338.21	0.234162	4.67443	0.234287	5.40938	0.042256
UCHL5_HUMAN	56	67	FKWQPGEEPAGS	9	1332.62	UCH37C88A_DEUBAD_K6/48 Ub3	30	1338.45	0.152407	4.90878	0.152599	5.40798	0.041837
UCHL5_HUMAN	56	67	FKWQPGEEPAGS	9	1332.62	UCH37C88A_DEUBAD_K6/48 Ub3	60	1338.46	0.149057	4.9277	0.149253	5.38702	0.014822
UCHL5_HUMAN	56	67	FKWQPGEEPAGS	9	1332.62	UCH37C88A_DEUBAD_K6/48 Ub3	120	1338.42	0.066274	4.88225	0.066713	5.37546	0.003908
UCHL5_HUMAN	56	67	FKWQPGEEPAGS	9	1332.62	UCH37C88A_DEUBAD_Ub	0	1333.57	0.038767	0	0	5.41009	0.04804
UCHL5_HUMAN	56	67	FKWQPGEEPAGS	9	1332.62	UCH37C88A_DEUBAD_Ub	1	1337.64	0.148485	4.06683	0.153463	5.40112	0.024109
UCHL5_HUMAN	56	67	FKWQPGEEPAGS	9	1332.62	UCH37C88A_DEUBAD_Ub	10	1337.84	0.104377	4.26556	0.111344	5.35703	0.052867
UCHL5_HUMAN	56	67	FKWQPGEEPAGS	9	1332.62	UCH37C88A_DEUBAD_Ub	30	1338.17	0.052972	4.6017	0.065643	5.40612	0.01987
UCHL5_HUMAN	56	67	FKWQPGEEPAGS	9	1332.62	UCH37C88A_DEUBAD_Ub	60	1338.2	0.071374	4.6296	0.081223	5.39908	0.027194
UCHL5_HUMAN	56	67	FKWQPGEEPAGS	9	1332.62	UCH37C88A_DEUBAD_Ub	120	1338.04	0.02821	4.47356	0.047945	5.46309	0.006355
UCHL5_HUMAN	56	68	FKWQPGEEPAGSV	10	1431.69	UCH37C88A_DEUBAD	0	1432.48	0.035161	0	0	5.79004	0.044275
UCHL5_HUMAN	56	68	FKWQPGEEPAGSV	10	1431.69	UCH37C88A_DEUBAD	1	1438.17	0.01516	5.69572	0.038291	5.79632	0.022222
UCHL5_HUMAN	56	68	FKWQPGEEPAGSV	10	1431.69	UCH37C88A_DEUBAD	10	1438.35	0.001131	5.86868	0.03518	5.79869	0.020801
UCHL5_HUMAN	56	68	FKWQPGEEPAGSV	10	1431.69	UCH37C88A_DEUBAD	30	1438.45	0.070288	5.9689	0.078592	5.79145	0.017291
UCHL5_HUMAN	56	68	FKWQPGEEPAGSV	10	1431.69	UCH37C88A_DEUBAD	60	1438.49	0.079862	6.01674	0.08726	5.79581	0.017509
UCHL5_HUMAN	56	68	FKWQPGEEPAGSV	10	1431.69	UCH37C88A_DEUBAD	120	1438.4	0	5.91721	0.035161	5.78766	0
UCHL5_HUMAN	56	68	FKWQPGEEPAGSV	10	1431.69	UCH37C88A_DEUBAD_K48 Ub2	0	1432.48	0.035161	0	0	5.79004	0.044275
UCHL5_HUMAN	56	68	FKWQPGEEPAGSV	10	1431.69	UCH37C88A_DEUBAD_K48 Ub2	1	1437.3	0.016928	4.82524	0.039024	5.79135	0.020069
UCHL5_HUMAN	56	68	FKWQPGEEPAGSV	10	1431.69	UCH37C88A_DEUBAD_K48 Ub2	10	1437.8	0.130274	5.32233	0.134935	5.7827	0.017671
UCHL5_HUMAN	56	68	FKWQPGEEPAGSV	10	1431.69	UCH37C88A_DEUBAD_K48 Ub2	30	1438.01	0.028113	5.53027	0.045019	5.78341	0.026636
UCHL5_HUMAN	56	68	FKWQPGEEPAGSV	10	1431.69	UCH37C88A_DEUBAD_K48 Ub2	60	1438.1	0.073123	5.62521	0.081138	5.78347	0.021529
UCHL5_HUMAN	56	68	FKWQPGEEPAGSV	10	1431.69	UCH37C88A_DEUBAD_K48 Ub2	120	1438.18	0.083143	5.70486	0.090273	5.77307	0.016708
UCHL5_HUMAN	56	68	FKWQPGEEPAGSV	10	1431.69	UCH37C88A_DEUBAD_K48 Ub3	0	1432.48	0.035161	0	0	5.79004	0.044275
UCHL5_HUMAN	56	68	FKWQPGEEPAGSV	10	1431.69	UCH37C88A_DEUBAD_K48 Ub3	1	1437.35	0.104917	4.87181	0.110652	5.79579	0.017079
UCHL5_HUMAN	56	68	FKWQPGEEPAGSV	10	1431.69	UCH37C88A_DEUBAD_K48 Ub3	10	1437.69	0.073602	5.21456	0.08157	5.79847	0.002222
UCHL5_HUMAN	56	68	FKWQPGEEPAGSV	10	1431.69	UCH37C88A_DEUBAD_K48 Ub3	30	1437.89	0.015057	5.41649	0.03825	5.80189	0.009751
UCHL5_HUMAN	56	68	FKWQPGEEPAGSV	10	1431.69	UCH37C88A_DEUBAD_K48 Ub3	60	1438.1	0.021676	5.61783	0.041306	5.79909	0.007433
UCHL5_HUMAN	56	68	FKWQPGEEPAGSV	10	1431.69	UCH37C88A_DEUBAD_K48 Ub3	120	1438.22	0.078452	5.74289	0.085972	5.79291	0.014861
UCHL5_HUMAN	56	68	FKWQPGEEPAGSV	10	1431.69	UCH37C88A_DEUBAD_K6/48 Ub3	0	1432.48	0.035161	0	0	5.79004	0.044275
UCHL5_HUMAN	56	68	FKWQPGEEPAGSV	10	1431.69	UCH37C88A_DEUBAD_K6/48 Ub3	1	1437.54	0.197718	5.05794	0.20082	5.80155	0.007875
UCHL5_HUMAN	56	68	FKWQPGEEPAGSV	10	1431.69	UCH37C88A_DEUBAD_K6/48 Ub3	10	1437.94	0.200545	5.46107	0.203605	5.78916	0.014084
UCHL5_HUMAN	56	68	FKWQPGEEPAGSV	10	1431.69	UCH37C88A_DEUBAD_K6/48 Ub3	30	1438.16	0.175736	5.68651	0.179219	5.78409	0.014505
UCHL5_HUMAN	56	68	FKWQPGEEPAGSV	10	1431.69	UCH37C88A_DEUBAD_K6/48 Ub3	60	1438.28	0.142613	5.79823	0.146884	5.78981	0.01472
UCHL5_HUMAN	56	68	FKWQPGEEPAGSV	10	1431.69	UCH37C88A_DEUBAD_K6/48 Ub3	120	1438.24	0.068136	5.76419	0.076674	5.78563	0.001912
UCHL5_HUMAN	56	68	FKWQPGEEPAGSV	10	1431.69	UCH37C88A_DEUBAD_Ub	0	1432.48	0.035161	0	0	5.79004	0.044275
UCHL5_HUMAN	56	68	FKWQPGEEPAGSV	10	1431.69	UCH37C88A_DEUBAD_Ub	1	1437.3	0.11485	4.82324	0.120112	5.78899	0.079607
UCHL5_HUMAN	56	68	FKWQPGEEPAGSV	10	1431.69	UCH37C88A_DEUBAD_Ub	10	1437.62	0.030289	5.14595	0.046409	5.92059	0.002135
UCHL5_HUMAN	56	68	FKWQPGEEPAGSV	10	1431.69	UCH37C88A_DEUBAD_Ub	30	1437.82	0.022724	5.33793	0.041865	5.92069	3.00388e-05
UCHL5_HUMAN	56	68	FKWQPGEEPAGSV	10	1431.69	UCH37C88A_DEUBAD_Ub	60	1438.02	0.058878	5.54502	0.068578	5.89421	0.050307
UCHL5_HUMAN	56	68	FKWQPGEEPAGSV	10	1431.69	UCH37C88A_DEUBAD_Ub	120	1437.99	0.022594	5.51195	0.041795	5.92494	0.006753
UCHL5_HUMAN	56	70	FKWQPGEEPAGSVVQ	12	1658.82	UCH37C88A_DEUBAD	0	1659.71	0.061217	0	0	5.68769	0.04657
UCHL5_HUMAN	56	70	FKWQPGEEPAGSVVQ	12	1658.82	UCH37C88A_DEUBAD	1	1666.78	0.183002	7.06452	0.19297	5.68699	0.023554
UCHL5_HUMAN	56	70	FKWQPGEEPAGSVVQ	12	1658.82	UCH37C88A_DEUBAD	10	1667.28	0.208809	7.56832	0.217597	5.69089	0.018527
UCHL5_HUMAN	56	70	FKWQPGEEPAGSVVQ	12	1658.82	UCH37C88A_DEUBAD	30	1667.35	0.106257	7.6353	0.12263	5.68644	0.014054
UCHL5_HUMAN	56	70	FKWQPGEEPAGSVVQ	12	1658.82	UCH37C88A_DEUBAD	60	1667.41	0.166181	7.70073	0.177098	5.69137	0.014064
UCHL5_HUMAN	56	70	FKWQPGEEPAGSVVQ	12	1658.82	UCH37C88A_DEUBAD	120	1667.29	0.211747	7.57451	0.220419	5.69396	3.81416e-05
UCHL5_HUMAN	56	70	FKWQPGEEPAGSVVQ	12	1658.82	UCH37C88A_DEUBAD_K48 Ub2	0	1659.71	0.061217	0	0	5.68769	0.04657
UCHL5_HUMAN	56	70	FKWQPGEEPAGSVVQ	12	1658.82	UCH37C88A_DEUBAD_K48 Ub2	1	1665.6	0.032616	5.88262	0.069363	5.69497	0.010265
UCHL5_HUMAN	56	70	FKWQPGEEPAGSVVQ	12	1658.82	UCH37C88A_DEUBAD_K48 Ub2	10	1666.4	0.228382	6.68625	0.236444	5.68784	0.010294
UCHL5_HUMAN	56	70	FKWQPGEEPAGSVVQ	12	1658.82	UCH37C88A_DEUBAD_K48 Ub2	30	1666.81	0.117684	7.09833	0.132654	5.68056	0.020079
UCHL5_HUMAN	56	70	FKWQPGEEPAGSVVQ	12	1658.82	UCH37C88A_DEUBAD_K48 Ub2	60	1667.05	0.119313	7.33541	0.134101	5.6831	0.013123
UCHL5_HUMAN	56	70	FKWQPGEEPAGSVVQ	12	1658.82	UCH37C88A_DEUBAD_K48 Ub2	120	1667.16	0.140981	7.44492	0.153699	5.67403	0.008421
UCHL5_HUMAN	56	70	FKWQPGEEPAGSVVQ	12	1658.82	UCH37C88A_DEUBAD_K48 Ub3	0	1659.71	0.061217	0	0	5.68769	0.04657
UCHL5_HUMAN	56	70	FKWQPGEEPAGSVVQ	12	1658.82	UCH37C88A_DEUBAD_K48 Ub3	1	1665.58	0.191223	5.86378	0.200782	5.69619	0.012466
UCHL5_HUMAN	56	70	FKWQPGEEPAGSVVQ	12	1658.82	UCH37C88A_DEUBAD_K48 Ub3	10	1666.08	0.158655	6.37092	0.170055	5.70142	0.015177
UCHL5_HUMAN	56	70	FKWQPGEEPAGSVVQ	12	1658.82	UCH37C88A_DEUBAD_K48 Ub3	30	1666.42	0.050278	6.70296	0.079218	5.70203	0.016951
UCHL5_HUMAN	56	70	FKWQPGEEPAGSVVQ	12	1658.82	UCH37C88A_DEUBAD_K48 Ub3	60	1666.81	0.058712	7.09543	0.084821	5.69921	0.014169
UCHL5_HUMAN	56	70	FKWQPGEEPAGSVVQ	12	1658.82	UCH37C88A_DEUBAD_K48 Ub3	120	1667.1	0.129506	7.38734	0.143246	5.70021	0.021125
UCHL5_HUMAN	56	70	FKWQPGEEPAGSVVQ	12	1658.82	UCH37C88A_DEUBAD_K6/48 Ub3	0	1659.71	0.061217	0	0	5.68769	0.04657
UCHL5_HUMAN	56	70	FKWQPGEEPAGSVVQ	12	1658.82	UCH37C88A_DEUBAD_K6/48 Ub3	1	1665.83	0.25789	6.11343	0.265056	5.70955	0.010366
UCHL5_HUMAN	56	70	FKWQPGEEPAGSVVQ	12	1658.82	UCH37C88A_DEUBAD_K6/48 Ub3	10	1666.38	0.177091	6.66656	0.187373	5.68988	0.00062
UCHL5_HUMAN	56	70	FKWQPGEEPAGSVVQ	12	1658.82	UCH37C88A_DEUBAD_K6/48 Ub3	30	1666.99	0.25439	7.28035	0.261652	5.68873	0.008003
UCHL5_HUMAN	56	70	FKWQPGEEPAGSVVQ	12	1658.82	UCH37C88A_DEUBAD_K6/48 Ub3	60	1667.23	0.181863	7.52005	0.191889	5.69481	0.014933
UCHL5_HUMAN	56	70	FKWQPGEEPAGSVVQ	12	1658.82	UCH37C88A_DEUBAD_K6/48 Ub3	120	1667.16	0.159046	7.44608	0.17042	5.69117	0.005807
UCHL5_HUMAN	56	70	FKWQPGEEPAGSVVQ	12	1658.82	UCH37C88A_DEUBAD_Ub	0	1659.71	0.061217	0	0	5.68769	0.04657
UCHL5_HUMAN	56	70	FKWQPGEEPAGSVVQ	12	1658.82	UCH37C88A_DEUBAD_Ub	1	1665.24	0.252349	5.52576	0.259668	5.64894	0.005435
UCHL5_HUMAN	56	70	FKWQPGEEPAGSVVQ	12	1658.82	UCH37C88A_DEUBAD_Ub	10	1665.99	0.24492	6.27799	0.252455	5.64173	0.001997
UCHL5_HUMAN	56	70	FKWQPGEEPAGSVVQ	12	1658.82	UCH37C88A_DEUBAD_Ub	30	1666.5	0.165959	6.7817	0.176889	5.64056	0.000264
UCHL5_HUMAN	56	70	FKWQPGEEPAGSVVQ	12	1658.82	UCH37C88A_DEUBAD_Ub	60	1666.65	0.204466	6.9336	0.213434	5.64663	0.004267
UCHL5_HUMAN	56	70	FKWQPGEEPAGSVVQ	12	1658.82	UCH37C88A_DEUBAD_Ub	120	1666.75	0.252672	7.03413	0.259982	5.64309	0.004878
UCHL5_HUMAN	56	71	FKWQPGEEPAGSVVQD	13	1773.84	UCH37C88A_DEUBAD	0	1774.91	0.075177	0	0	5.72203	0.035601
UCHL5_HUMAN	56	71	FKWQPGEEPAGSVVQD	13	1773.84	UCH37C88A_DEUBAD	1	1782.16	0.234465	7.24816	0.246223	5.72142	0.025451
UCHL5_HUMAN	56	71	FKWQPGEEPAGSVVQD	13	1773.84	UCH37C88A_DEUBAD	10	1782.6	0.198272	7.69445	0.212045	5.72723	0.021603
UCHL5_HUMAN	56	71	FKWQPGEEPAGSVVQD	13	1773.84	UCH37C88A_DEUBAD	30	1782.73	0.171373	7.81575	0.187137	5.7145	0.022316
UCHL5_HUMAN	56	71	FKWQPGEEPAGSVVQD	13	1773.84	UCH37C88A_DEUBAD	60	1782.78	0.198774	7.86654	0.212515	5.72164	0.02183
UCHL5_HUMAN	56	71	FKWQPGEEPAGSVVQD	13	1773.84	UCH37C88A_DEUBAD	120	1782.71	0.206213	7.79643	0.219489	5.71689	0.003187
UCHL5_HUMAN	56	71	FKWQPGEEPAGSVVQD	13	1773.84	UCH37C88A_DEUBAD_K48 Ub2	0	1774.91	0.075177	0	0	5.72203	0.035601
UCHL5_HUMAN	56	71	FKWQPGEEPAGSVVQD	13	1773.84	UCH37C88A_DEUBAD_K48 Ub2	1	1780.91	0.126275	5.99881	0.146959	5.72885	0.019751
UCHL5_HUMAN	56	71	FKWQPGEEPAGSVVQD	13	1773.84	UCH37C88A_DEUBAD_K48 Ub2	10	1781.69	0.271678	6.78242	0.281887	5.71914	0.01801
UCHL5_HUMAN	56	71	FKWQPGEEPAGSVVQD	13	1773.84	UCH37C88A_DEUBAD_K48 Ub2	30	1782.15	0.217169	7.23512	0.229813	5.71435	0.023366
UCHL5_HUMAN	56	71	FKWQPGEEPAGSVVQD	13	1773.84	UCH37C88A_DEUBAD_K48 Ub2	60	1782.38	0.184927	7.46542	0.199623	5.71853	0.018737
UCHL5_HUMAN	56	71	FKWQPGEEPAGSVVQD	13	1773.84	UCH37C88A_DEUBAD_K48 Ub2	120	1782.5	0.181193	7.59188	0.196169	5.70714	0.012639
UCHL5_HUMAN	56	71	FKWQPGEEPAGSVVQD	13	1773.84	UCH37C88A_DEUBAD_K48 Ub3	0	1774.91	0.075177	0	0	5.72203	0.035601
UCHL5_HUMAN	56	71	FKWQPGEEPAGSVVQD	13	1773.84	UCH37C88A_DEUBAD_K48 Ub3	1	1780.96	0.252069	6.04565	0.26304	5.72819	0.017532
UCHL5_HUMAN	56	71	FKWQPGEEPAGSVVQD	13	1773.84	UCH37C88A_DEUBAD_K48 Ub3	10	1781.42	0.219801	6.50625	0.232301	5.7295	0.006567
UCHL5_HUMAN	56	71	FKWQPGEEPAGSVVQD	13	1773.84	UCH37C88A_DEUBAD_K48 Ub3	30	1781.76	0.188401	6.848	0.202846	5.73371	0.015013
UCHL5_HUMAN	56	71	FKWQPGEEPAGSVVQD	13	1773.84	UCH37C88A_DEUBAD_K48 Ub3	60	1782.13	0.174308	7.22428	0.189828	5.73147	0.014794
UCHL5_HUMAN	56	71	FKWQPGEEPAGSVVQD	13	1773.84	UCH37C88A_DEUBAD_K48 Ub3	120	1782.38	0.204145	7.46973	0.217547	5.72477	0.015784
UCHL5_HUMAN	56	71	FKWQPGEEPAGSVVQD	13	1773.84	UCH37C88A_DEUBAD_K6/48 Ub3	0	1774.91	0.075177	0	0	5.72203	0.035601
UCHL5_HUMAN	56	71	FKWQPGEEPAGSVVQD	13	1773.84	UCH37C88A_DEUBAD_K6/48 Ub3	1	1781.2	0.219155	6.28606	0.23169	5.73733	0.012896
UCHL5_HUMAN	56	71	FKWQPGEEPAGSVVQD	13	1773.84	UCH37C88A_DEUBAD_K6/48 Ub3	10	1781.73	0.206391	6.82318	0.219656	5.71318	0.004748
UCHL5_HUMAN	56	71	FKWQPGEEPAGSVVQD	13	1773.84	UCH37C88A_DEUBAD_K6/48 Ub3	30	1782.34	0.270844	7.4335	0.281084	5.71741	0.012518
UCHL5_HUMAN	56	71	FKWQPGEEPAGSVVQD	13	1773.84	UCH37C88A_DEUBAD_K6/48 Ub3	60	1782.57	0.271553	7.65796	0.281767	5.7235	0.016397
UCHL5_HUMAN	56	71	FKWQPGEEPAGSVVQD	13	1773.84	UCH37C88A_DEUBAD_K6/48 Ub3	120	1782.55	0.161416	7.64038	0.178064	5.7157	0.005945
UCHL5_HUMAN	56	71	FKWQPGEEPAGSVVQD	13	1773.84	UCH37C88A_DEUBAD_Ub	0	1774.91	0.075177	0	0	5.72203	0.035601
UCHL5_HUMAN	56	71	FKWQPGEEPAGSVVQD	13	1773.84	UCH37C88A_DEUBAD_Ub	1	1780.98	0.367637	6.06647	0.375244	5.69707	0.02359
UCHL5_HUMAN	56	71	FKWQPGEEPAGSVVQD	13	1773.84	UCH37C88A_DEUBAD_Ub	10	1781.52	0.355515	6.61021	0.363376	5.69283	0.027646
UCHL5_HUMAN	56	71	FKWQPGEEPAGSVVQD	13	1773.84	UCH37C88A_DEUBAD_Ub	30	1782	0.275392	7.09255	0.285469	5.69431	0.032245
UCHL5_HUMAN	56	71	FKWQPGEEPAGSVVQD	13	1773.84	UCH37C88A_DEUBAD_Ub	60	1782.11	0.251929	7.20049	0.262906	5.69222	0.023302
UCHL5_HUMAN	56	71	FKWQPGEEPAGSVVQD	13	1773.84	UCH37C88A_DEUBAD_Ub	120	1782.08	0.2298	7.16801	0.241784	5.67154	0.004046
UCHL5_HUMAN	56	74	FKWQPGEEPAGSVVQDSRL	16	2130.06	UCH37C88A_DEUBAD	0	2131.23	0.078642	0	0	5.95703	0.034248
UCHL5_HUMAN	56	74	FKWQPGEEPAGSVVQDSRL	16	2130.06	UCH37C88A_DEUBAD	1	2140.47	0.066049	9.23549	0.102699	5.96995	0.021281
UCHL5_HUMAN	56	74	FKWQPGEEPAGSVVQDSRL	16	2130.06	UCH37C88A_DEUBAD	10	2140.91	0.111327	9.68068	0.136302	5.96588	0.022016
UCHL5_HUMAN	56	74	FKWQPGEEPAGSVVQDSRL	16	2130.06	UCH37C88A_DEUBAD	30	2141.09	0.037208	9.85916	0.087	5.96241	0.015845
UCHL5_HUMAN	56	74	FKWQPGEEPAGSVVQDSRL	16	2130.06	UCH37C88A_DEUBAD	60	2141.13	0.195765	9.90011	0.21097	5.96821	0.015311
UCHL5_HUMAN	56	74	FKWQPGEEPAGSVVQDSRL	16	2130.06	UCH37C88A_DEUBAD	120	2141	0.023032	9.76936	0.081945	5.9625	0.000532
UCHL5_HUMAN	56	74	FKWQPGEEPAGSVVQDSRL	16	2130.06	UCH37C88A_DEUBAD_K48 Ub2	0	2131.23	0.078642	0	0	5.95703	0.034248
UCHL5_HUMAN	56	74	FKWQPGEEPAGSVVQDSRL	16	2130.06	UCH37C88A_DEUBAD_K48 Ub2	1	2138.98	0	7.74319	0.078642	5.99701	0
UCHL5_HUMAN	56	74	FKWQPGEEPAGSVVQDSRL	16	2130.06	UCH37C88A_DEUBAD_K48 Ub2	10	2139.71	0.161171	8.48136	0.179334	5.98116	0.013018
UCHL5_HUMAN	56	74	FKWQPGEEPAGSVVQDSRL	16	2130.06	UCH37C88A_DEUBAD_K48 Ub2	30	2140.42	0.175526	9.18629	0.192338	5.97187	0.018832
UCHL5_HUMAN	56	74	FKWQPGEEPAGSVVQDSRL	16	2130.06	UCH37C88A_DEUBAD_K48 Ub2	60	2140.7	0.171439	9.46553	0.188616	5.97177	0.018738
UCHL5_HUMAN	56	74	FKWQPGEEPAGSVVQDSRL	16	2130.06	UCH37C88A_DEUBAD_K48 Ub2	120	2140.84	0.331351	9.60625	0.340555	5.96051	0.006126
UCHL5_HUMAN	56	74	FKWQPGEEPAGSVVQDSRL	16	2130.06	UCH37C88A_DEUBAD_K48 Ub3	0	2131.23	0.078642	0	0	5.95703	0.034248
UCHL5_HUMAN	56	74	FKWQPGEEPAGSVVQDSRL	16	2130.06	UCH37C88A_DEUBAD_K48 Ub3	1	2138.89	0.466935	7.65537	0.473511	5.98961	0.008055
UCHL5_HUMAN	56	74	FKWQPGEEPAGSVVQDSRL	16	2130.06	UCH37C88A_DEUBAD_K48 Ub3	10	2139.93	0.331455	8.69816	0.340657	5.98032	0.013477
UCHL5_HUMAN	56	74	FKWQPGEEPAGSVVQDSRL	16	2130.06	UCH37C88A_DEUBAD_K48 Ub3	30	2140.17	0.21963	8.94113	0.233285	5.98057	0.014341
UCHL5_HUMAN	56	74	FKWQPGEEPAGSVVQDSRL	16	2130.06	UCH37C88A_DEUBAD_K48 Ub3	60	2140.54	0.29249	9.30399	0.302878	5.98084	0.016645
UCHL5_HUMAN	56	74	FKWQPGEEPAGSVVQDSRL	16	2130.06	UCH37C88A_DEUBAD_K48 Ub3	120	2140.71	0.335301	9.47433	0.3444	5.96714	0.01544
UCHL5_HUMAN	56	74	FKWQPGEEPAGSVVQDSRL	16	2130.06	UCH37C88A_DEUBAD_K6/48 Ub3	0	2131.23	0.078642	0	0	5.95703	0.034248
UCHL5_HUMAN	56	74	FKWQPGEEPAGSVVQDSRL	16	2130.06	UCH37C88A_DEUBAD_K6/48 Ub3	1	2139.35	0.31133	8.11806	0.321108	5.98967	0.003548
UCHL5_HUMAN	56	74	FKWQPGEEPAGSVVQDSRL	16	2130.06	UCH37C88A_DEUBAD_K6/48 Ub3	10	2140	0.320198	8.76373	0.329714	5.97006	0.003849
UCHL5_HUMAN	56	74	FKWQPGEEPAGSVVQDSRL	16	2130.06	UCH37C88A_DEUBAD_K6/48 Ub3	30	2140.68	0.302921	9.44629	0.312963	5.96755	0.013663
UCHL5_HUMAN	56	74	FKWQPGEEPAGSVVQDSRL	16	2130.06	UCH37C88A_DEUBAD_K6/48 Ub3	60	2140.94	0.171752	9.70257	0.1889	5.97696	0.011539
UCHL5_HUMAN	56	74	FKWQPGEEPAGSVVQDSRL	16	2130.06	UCH37C88A_DEUBAD_K6/48 Ub3	120	2140.83	0.187059	9.59522	0.202918	5.96527	0.007699
UCHL5_HUMAN	56	74	FKWQPGEEPAGSVVQDSRL	16	2130.06	UCH37C88A_DEUBAD_Ub	0	2131.24	0.052876	0	0	5.95805	0.035572
UCHL5_HUMAN	56	74	FKWQPGEEPAGSVVQDSRL	16	2130.06	UCH37C88A_DEUBAD_Ub	1	2138.72	0.130603	7.47558	0.140901	5.9336	0.005202
UCHL5_HUMAN	56	74	FKWQPGEEPAGSVVQDSRL	16	2130.06	UCH37C88A_DEUBAD_Ub	10	2139.3	0.031562	8.06006	0.06158	5.92567	0.00212
UCHL5_HUMAN	56	74	FKWQPGEEPAGSVVQDSRL	16	2130.06	UCH37C88A_DEUBAD_Ub	30	2139.6	0	8.35981	0.052876	5.92989	0
UCHL5_HUMAN	56	74	FKWQPGEEPAGSVVQDSRL	16	2130.06	UCH37C88A_DEUBAD_Ub	60	2139.7	0	8.45779	0.052876	5.9359	0
UCHL5_HUMAN	56	74	FKWQPGEEPAGSVVQDSRL	16	2130.06	UCH37C88A_DEUBAD_Ub	120	2139.94	0.163889	8.69806	0.172208	5.92811	0.00686
UCHL5_HUMAN	68	74	VVQDSRL	6	816.457	UCH37C88A_DEUBAD	0	817.02	0.211839	0	0	4.08231	0.046915
UCHL5_HUMAN	68	74	VVQDSRL	6	816.457	UCH37C88A_DEUBAD	1	820.296	0.062302	3.27604	0.220811	4.08939	0.013231
UCHL5_HUMAN	68	74	VVQDSRL	6	816.457	UCH37C88A_DEUBAD	10	820.256	0.072826	3.23544	0.224008	4.08614	0.013595
UCHL5_HUMAN	68	74	VVQDSRL	6	816.457	UCH37C88A_DEUBAD	30	820.27	0.043241	3.25026	0.216208	4.08479	0.005936
UCHL5_HUMAN	68	74	VVQDSRL	6	816.457	UCH37C88A_DEUBAD	60	820.299	0.024481	3.27917	0.213249	4.09317	0.007618
UCHL5_HUMAN	68	74	VVQDSRL	6	816.457	UCH37C88A_DEUBAD	120	820.25	0.037701	3.23005	0.215168	4.09001	0.006178
UCHL5_HUMAN	68	74	VVQDSRL	6	816.457	UCH37C88A_DEUBAD_K48 Ub2	0	817.02	0.211839	0	0	4.08231	0.046915
UCHL5_HUMAN	68	74	VVQDSRL	6	816.457	UCH37C88A_DEUBAD_K48 Ub2	1	820.258	0.05352	3.23793	0.218496	4.08086	0.007228
UCHL5_HUMAN	68	74	VVQDSRL	6	816.457	UCH37C88A_DEUBAD_K48 Ub2	10	820.241	0.093164	3.22057	0.23142	4.07801	0.0185
UCHL5_HUMAN	68	74	VVQDSRL	6	816.457	UCH37C88A_DEUBAD_K48 Ub2	30	820.281	0.092786	3.26115	0.231269	4.07038	0.022486
UCHL5_HUMAN	68	74	VVQDSRL	6	816.457	UCH37C88A_DEUBAD_K48 Ub2	60	820.248	0.075829	3.22829	0.225002	4.07986	0.017072
UCHL5_HUMAN	68	74	VVQDSRL	6	816.457	UCH37C88A_DEUBAD_K48 Ub2	120	820.206	0.062533	3.18584	0.220876	4.06642	0.013703
UCHL5_HUMAN	68	74	VVQDSRL	6	816.457	UCH37C88A_DEUBAD_K48 Ub3	0	817.02	0.211839	0	0	4.08231	0.046915
UCHL5_HUMAN	68	74	VVQDSRL	6	816.457	UCH37C88A_DEUBAD_K48 Ub3	1	819.883	0.142902	2.86313	0.255532	4.08445	0.016823
UCHL5_HUMAN	68	74	VVQDSRL	6	816.457	UCH37C88A_DEUBAD_K48 Ub3	10	820.205	0.082809	3.18443	0.227449	4.08455	0.01407
UCHL5_HUMAN	68	74	VVQDSRL	6	816.457	UCH37C88A_DEUBAD_K48 Ub3	30	820.231	0.070177	3.2105	0.223161	4.0812	0.014563
UCHL5_HUMAN	68	74	VVQDSRL	6	816.457	UCH37C88A_DEUBAD_K48 Ub3	60	820.265	0.080918	3.24492	0.226768	4.08391	0.008436
UCHL5_HUMAN	68	74	VVQDSRL	6	816.457	UCH37C88A_DEUBAD_K48 Ub3	120	820.201	0.075172	3.18085	0.224781	4.07909	0.003234
UCHL5_HUMAN	68	74	VVQDSRL	6	816.457	UCH37C88A_DEUBAD_K6/48 Ub3	0	817.02	0.211839	0	0	4.08231	0.046915
UCHL5_HUMAN	68	74	VVQDSRL	6	816.457	UCH37C88A_DEUBAD_K6/48 Ub3	1	820.215	0.09278	3.19512	0.231266	4.09179	0.008236
UCHL5_HUMAN	68	74	VVQDSRL	6	816.457	UCH37C88A_DEUBAD_K6/48 Ub3	10	820.226	0.100127	3.20599	0.23431	4.07719	0.014835
UCHL5_HUMAN	68	74	VVQDSRL	6	816.457	UCH37C88A_DEUBAD_K6/48 Ub3	30	820.25	0.087442	3.22999	0.229177	4.07819	0.012447
UCHL5_HUMAN	68	74	VVQDSRL	6	816.457	UCH37C88A_DEUBAD_K6/48 Ub3	60	820.275	0.083025	3.25447	0.227528	4.08493	0.012825
UCHL5_HUMAN	68	74	VVQDSRL	6	816.457	UCH37C88A_DEUBAD_K6/48 Ub3	120	820.204	0.058938	3.18342	0.219885	4.08171	0.006887
UCHL5_HUMAN	68	74	VVQDSRL	6	816.457	UCH37C88A_DEUBAD_Ub	0	817.02	0.211839	0	0	4.08231	0.046915
UCHL5_HUMAN	68	74	VVQDSRL	6	816.457	UCH37C88A_DEUBAD_Ub	1	820.057	0.091892	3.03729	0.230911	3.97089	0.00512
UCHL5_HUMAN	68	74	VVQDSRL	6	816.457	UCH37C88A_DEUBAD_Ub	10	820.123	0.153375	3.103	0.261534	3.981	0.060017
UCHL5_HUMAN	68	74	VVQDSRL	6	816.457	UCH37C88A_DEUBAD_Ub	30	820.016	0.088263	2.99553	0.229491	3.96145	0.023914
UCHL5_HUMAN	68	74	VVQDSRL	6	816.457	UCH37C88A_DEUBAD_Ub	60	820.07	0.168591	3.05025	0.270737	3.98995	0.056803
UCHL5_HUMAN	68	74	VVQDSRL	6	816.457	UCH37C88A_DEUBAD_Ub	120	820.002	0.104479	2.98226	0.236203	3.9573	0.004961
UCHL5_HUMAN	79	86	FAKQVINN	7	933.515	UCH37C88A_DEUBAD	0	934.07	0.062644	0	0	3.82191	0.0282
UCHL5_HUMAN	79	86	FAKQVINN	7	933.515	UCH37C88A_DEUBAD	1	936.595	0	2.52501	0.062644	3.80307	0
UCHL5_HUMAN	79	86	FAKQVINN	7	933.515	UCH37C88A_DEUBAD	10	937.665	0.09405	3.59472	0.113003	3.81753	0.017189
UCHL5_HUMAN	79	86	FAKQVINN	7	933.515	UCH37C88A_DEUBAD	30	938.05	0.034677	3.98006	0.071601	3.81387	0.012513
UCHL5_HUMAN	79	86	FAKQVINN	7	933.515	UCH37C88A_DEUBAD	60	938.216	0.008338	4.14607	0.063196	3.81978	0.00853
UCHL5_HUMAN	79	86	FAKQVINN	7	933.515	UCH37C88A_DEUBAD	120	938.17	0	4.09938	0.062644	3.80509	0
UCHL5_HUMAN	79	86	FAKQVINN	7	933.515	UCH37C88A_DEUBAD_K48 Ub2	0	934.07	0.062644	0	0	3.82191	0.0282
UCHL5_HUMAN	79	86	FAKQVINN	7	933.515	UCH37C88A_DEUBAD_K48 Ub2	1	935.34	0.073824	1.26982	0.09682	3.81408	0.01127
UCHL5_HUMAN	79	86	FAKQVINN	7	933.515	UCH37C88A_DEUBAD_K48 Ub2	10	935.864	0.042278	1.79321	0.075576	3.80994	0.011607
UCHL5_HUMAN	79	86	FAKQVINN	7	933.515	UCH37C88A_DEUBAD_K48 Ub2	30	935.988	0.114925	1.91723	0.130889	3.80208	0.017849
UCHL5_HUMAN	79	86	FAKQVINN	7	933.515	UCH37C88A_DEUBAD_K48 Ub2	60	936.366	0.136551	2.29544	0.150234	3.80723	0.009769
UCHL5_HUMAN	79	86	FAKQVINN	7	933.515	UCH37C88A_DEUBAD_K48 Ub2	120	936.408	0.143958	2.33751	0.156998	3.79556	0.008539
UCHL5_HUMAN	79	86	FAKQVINN	7	933.515	UCH37C88A_DEUBAD_K48 Ub3	0	934.07	0.062644	0	0	3.82191	0.0282
UCHL5_HUMAN	79	86	FAKQVINN	7	933.515	UCH37C88A_DEUBAD_K48 Ub3	1	935.722	0.200487	1.65197	0.210046	3.81186	0.013147
UCHL5_HUMAN	79	86	FAKQVINN	7	933.515	UCH37C88A_DEUBAD_K48 Ub3	10	935.894	0.052878	1.82381	0.081977	3.81691	0.004599
UCHL5_HUMAN	79	86	FAKQVINN	7	933.515	UCH37C88A_DEUBAD_K48 Ub3	30	936.077	0.027565	2.00628	0.06844	3.82325	0.000959
UCHL5_HUMAN	79	86	FAKQVINN	7	933.515	UCH37C88A_DEUBAD_K48 Ub3	60	936.336	0.065429	2.26554	0.090582	3.8175	0.00168
UCHL5_HUMAN	79	86	FAKQVINN	7	933.515	UCH37C88A_DEUBAD_K48 Ub3	120	936.632	0.083816	2.56195	0.104639	3.81469	0.007548
UCHL5_HUMAN	79	86	FAKQVINN	7	933.515	UCH37C88A_DEUBAD_K6/48 Ub3	0	934.07	0.062644	0	0	3.82191	0.0282
UCHL5_HUMAN	79	86	FAKQVINN	7	933.515	UCH37C88A_DEUBAD_K6/48 Ub3	1	935.801	0.216327	1.73021	0.225214	3.82149	0.005184
UCHL5_HUMAN	79	86	FAKQVINN	7	933.515	UCH37C88A_DEUBAD_K6/48 Ub3	10	936.277	0.121235	2.20618	0.136463	3.80738	0.002745
UCHL5_HUMAN	79	86	FAKQVINN	7	933.515	UCH37C88A_DEUBAD_K6/48 Ub3	30	936.94	0.096018	2.86914	0.114646	3.80508	0.005389
UCHL5_HUMAN	79	86	FAKQVINN	7	933.515	UCH37C88A_DEUBAD_K6/48 Ub3	60	937.193	0.123814	3.12295	0.138759	3.803	0.007022
UCHL5_HUMAN	79	86	FAKQVINN	7	933.515	UCH37C88A_DEUBAD_K6/48 Ub3	120	937.59	0.133864	3.51948	0.147797	3.80629	0.002954
UCHL5_HUMAN	79	86	FAKQVINN	7	933.515	UCH37C88A_DEUBAD_Ub	0	934.07	0.062644	0	0	3.82191	0.0282
UCHL5_HUMAN	79	86	FAKQVINN	7	933.515	UCH37C88A_DEUBAD_Ub	1	935.854	0.274455	1.78342	0.281513	3.74275	0.002134
UCHL5_HUMAN	79	86	FAKQVINN	7	933.515	UCH37C88A_DEUBAD_Ub	10	936.192	0.270508	2.12178	0.277667	3.74049	0.024416
UCHL5_HUMAN	79	86	FAKQVINN	7	933.515	UCH37C88A_DEUBAD_Ub	30	936.998	0.063317	2.92733	0.089069	3.91476	0.225129
UCHL5_HUMAN	79	86	FAKQVINN	7	933.515	UCH37C88A_DEUBAD_Ub	60	937.041	0.280017	2.97044	0.286938	4.03503	0.231445
UCHL5_HUMAN	79	86	FAKQVINN	7	933.515	UCH37C88A_DEUBAD_Ub	120	937.54	0.020021	3.46933	0.065765	3.73721	0.000588
UCHL5_HUMAN	79	90	FAKQVINNAAAT	11	1247.67	UCH37C88A_DEUBAD	0	1248.36	0.037439	0	0	4.13294	0.038465
UCHL5_HUMAN	79	90	FAKQVINNAAAT	11	1247.67	UCH37C88A_DEUBAD	1	1251.81	0.083406	3.45006	0.091423	4.13251	0.015397
UCHL5_HUMAN	79	90	FAKQVINNAAAT	11	1247.67	UCH37C88A_DEUBAD	10	1254.13	0.186265	5.76568	0.18999	4.12134	0.016016
UCHL5_HUMAN	79	90	FAKQVINNAAAT	11	1247.67	UCH37C88A_DEUBAD	30	1255.14	0.071327	6.77679	0.080556	4.1175	0.009619
UCHL5_HUMAN	79	90	FAKQVINNAAAT	11	1247.67	UCH37C88A_DEUBAD	60	1255.53	0.041106	7.16379	0.0556	4.12111	0.005396
UCHL5_HUMAN	79	90	FAKQVINNAAAT	11	1247.67	UCH37C88A_DEUBAD	120	1255.8	0	7.43738	0.037439	4.11745	0
UCHL5_HUMAN	79	90	FAKQVINNAAAT	11	1247.67	UCH37C88A_DEUBAD_K48 Ub2	0	1248.36	0.037439	0	0	4.13294	0.038465
UCHL5_HUMAN	79	90	FAKQVINNAAAT	11	1247.67	UCH37C88A_DEUBAD_K48 Ub2	1	1249.79	0.06667	1.42336	0.076463	4.13679	0.006554
UCHL5_HUMAN	79	90	FAKQVINNAAAT	11	1247.67	UCH37C88A_DEUBAD_K48 Ub2	10	1250.34	0.053912	1.976	0.065636	4.12891	0.009765
UCHL5_HUMAN	79	90	FAKQVINNAAAT	11	1247.67	UCH37C88A_DEUBAD_K48 Ub2	30	1250.6	0.231946	2.2401	0.234948	4.11997	0.017987
UCHL5_HUMAN	79	90	FAKQVINNAAAT	11	1247.67	UCH37C88A_DEUBAD_K48 Ub2	60	1250.99	0.252492	2.62316	0.255253	4.12634	0.013286
UCHL5_HUMAN	79	90	FAKQVINNAAAT	11	1247.67	UCH37C88A_DEUBAD_K48 Ub2	120	1250.92	0.071788	2.55477	0.080964	4.11745	0.012743
UCHL5_HUMAN	79	90	FAKQVINNAAAT	11	1247.67	UCH37C88A_DEUBAD_K48 Ub3	0	1248.36	0.037439	0	0	4.13294	0.038465
UCHL5_HUMAN	79	90	FAKQVINNAAAT	11	1247.67	UCH37C88A_DEUBAD_K48 Ub3	1	1250.16	0.394576	1.79373	0.396348	4.13582	0.009818
UCHL5_HUMAN	79	90	FAKQVINNAAAT	11	1247.67	UCH37C88A_DEUBAD_K48 Ub3	10	1250.49	0.115126	2.12971	0.121061	4.1368	0.002943
UCHL5_HUMAN	79	90	FAKQVINNAAAT	11	1247.67	UCH37C88A_DEUBAD_K48 Ub3	30	1250.86	0.001332	2.49735	0.037462	4.13503	0.002957
UCHL5_HUMAN	79	90	FAKQVINNAAAT	11	1247.67	UCH37C88A_DEUBAD_K48 Ub3	60	1251.21	0.095322	2.85	0.10241	4.13422	0.001098
UCHL5_HUMAN	79	90	FAKQVINNAAAT	11	1247.67	UCH37C88A_DEUBAD_K48 Ub3	120	1251.69	0.060204	3.32094	0.070895	4.13483	0.007918
UCHL5_HUMAN	79	90	FAKQVINNAAAT	11	1247.67	UCH37C88A_DEUBAD_K6/48 Ub3	0	1248.36	0.037439	0	0	4.13294	0.038465
UCHL5_HUMAN	79	90	FAKQVINNAAAT	11	1247.67	UCH37C88A_DEUBAD_K6/48 Ub3	1	1250.36	0.20413	1.99587	0.207535	4.14619	0.009694
UCHL5_HUMAN	79	90	FAKQVINNAAAT	11	1247.67	UCH37C88A_DEUBAD_K6/48 Ub3	10	1251.19	0.171498	2.82714	0.175537	4.12475	0.004462
UCHL5_HUMAN	79	90	FAKQVINNAAAT	11	1247.67	UCH37C88A_DEUBAD_K6/48 Ub3	30	1251.77	0.161115	3.40128	0.165408	4.12226	0.004388
UCHL5_HUMAN	79	90	FAKQVINNAAAT	11	1247.67	UCH37C88A_DEUBAD_K6/48 Ub3	60	1252.59	0.240953	4.22703	0.243844	4.12606	0.01195
UCHL5_HUMAN	79	90	FAKQVINNAAAT	11	1247.67	UCH37C88A_DEUBAD_K6/48 Ub3	120	1253.34	0.28971	4.97874	0.292119	4.12146	0.005702
UCHL5_HUMAN	79	90	FAKQVINNAAAT	11	1247.67	UCH37C88A_DEUBAD_Ub	0	1248.36	0.037439	0	0	4.13294	0.038465
UCHL5_HUMAN	79	90	FAKQVINNAAAT	11	1247.67	UCH37C88A_DEUBAD_Ub	1	1250.55	0.158132	2.18529	0.162503	4.10922	0.025671
UCHL5_HUMAN	79	90	FAKQVINNAAAT	11	1247.67	UCH37C88A_DEUBAD_Ub	10	1251.25	0.433999	2.88407	0.435611	4.09553	0.029077
UCHL5_HUMAN	79	90	FAKQVINNAAAT	11	1247.67	UCH37C88A_DEUBAD_Ub	30	1252.23	0.002222	3.86855	0.037505	4.10185	0.035606
UCHL5_HUMAN	79	90	FAKQVINNAAAT	11	1247.67	UCH37C88A_DEUBAD_Ub	60	1252.99	0.193239	4.62494	0.196832	4.10278	0.03152
UCHL5_HUMAN	79	90	FAKQVINNAAAT	11	1247.67	UCH37C88A_DEUBAD_Ub	120	1253.62	0	5.25797	0.037439	4.08685	0
UCHL5_HUMAN	79	91	FAKQVINNAAATQ	12	1375.73	UCH37C88A_DEUBAD	0	1376.84	0.190057	0	0	4.14776	0.037704
UCHL5_HUMAN	79	91	FAKQVINNAAATQ	12	1375.73	UCH37C88A_DEUBAD	1	1380.15	0.172115	3.31598	0.256408	4.12784	0.006954
UCHL5_HUMAN	79	91	FAKQVINNAAATQ	12	1375.73	UCH37C88A_DEUBAD	10	1382.41	0.246915	5.57546	0.311591	4.12859	0.016044
UCHL5_HUMAN	79	91	FAKQVINNAAATQ	12	1375.73	UCH37C88A_DEUBAD	30	1383.34	0.135971	6.50453	0.233687	4.12652	0.011809
UCHL5_HUMAN	79	91	FAKQVINNAAATQ	12	1375.73	UCH37C88A_DEUBAD	60	1383.73	0.16895	6.89707	0.254294	4.13057	0.008335
UCHL5_HUMAN	79	91	FAKQVINNAAATQ	12	1375.73	UCH37C88A_DEUBAD	120	1384.04	0.176215	7.2047	0.259178	4.12371	0.001257
UCHL5_HUMAN	79	91	FAKQVINNAAATQ	12	1375.73	UCH37C88A_DEUBAD_K48 Ub2	0	1376.84	0.190057	0	0	4.14776	0.037704
UCHL5_HUMAN	79	91	FAKQVINNAAATQ	12	1375.73	UCH37C88A_DEUBAD_K48 Ub2	1	1378.11	0.113021	1.27348	0.221123	4.14475	0.00987
UCHL5_HUMAN	79	91	FAKQVINNAAATQ	12	1375.73	UCH37C88A_DEUBAD_K48 Ub2	10	1378.73	0.191819	1.89431	0.27003	4.13636	0.011946
UCHL5_HUMAN	79	91	FAKQVINNAAATQ	12	1375.73	UCH37C88A_DEUBAD_K48 Ub2	30	1378.88	0.164033	2.04672	0.251055	4.12765	0.018295
UCHL5_HUMAN	79	91	FAKQVINNAAATQ	12	1375.73	UCH37C88A_DEUBAD_K48 Ub2	60	1378.93	0.142747	2.09188	0.237694	4.13405	0.015979
UCHL5_HUMAN	79	91	FAKQVINNAAATQ	12	1375.73	UCH37C88A_DEUBAD_K48 Ub2	120	1379.54	0.187151	2.70312	0.266734	4.1216	0.014822
UCHL5_HUMAN	79	91	FAKQVINNAAATQ	12	1375.73	UCH37C88A_DEUBAD_K48 Ub3	0	1376.78	0.063546	0	0	4.15013	0.037926
UCHL5_HUMAN	79	91	FAKQVINNAAATQ	12	1375.73	UCH37C88A_DEUBAD_K48 Ub3	1	1378.47	0.174521	1.69322	0.18573	4.14073	0.015757
UCHL5_HUMAN	79	91	FAKQVINNAAATQ	12	1375.73	UCH37C88A_DEUBAD_K48 Ub3	10	1379.09	0.288679	2.31164	0.29559	4.13587	0.003705
UCHL5_HUMAN	79	91	FAKQVINNAAATQ	12	1375.73	UCH37C88A_DEUBAD_K48 Ub3	30	1379.41	0.32468	2.6317	0.33084	4.13149	0.003538
UCHL5_HUMAN	79	91	FAKQVINNAAATQ	12	1375.73	UCH37C88A_DEUBAD_K48 Ub3	60	1379.74	0.39068	2.95832	0.395815	4.13398	0.001832
UCHL5_HUMAN	79	91	FAKQVINNAAATQ	12	1375.73	UCH37C88A_DEUBAD_K48 Ub3	120	1380.55	0.205575	3.76879	0.215173	4.13387	0.006973
UCHL5_HUMAN	79	91	FAKQVINNAAATQ	12	1375.73	UCH37C88A_DEUBAD_K6/48 Ub3	0	1376.78	0.063546	0	0	4.15013	0.037926
UCHL5_HUMAN	79	91	FAKQVINNAAATQ	12	1375.73	UCH37C88A_DEUBAD_K6/48 Ub3	1	1378.94	0.229961	2.1603	0.238579	4.1504	0.008591
UCHL5_HUMAN	79	91	FAKQVINNAAATQ	12	1375.73	UCH37C88A_DEUBAD_K6/48 Ub3	10	1380.11	0.367748	3.33743	0.373198	4.12645	0.006765
UCHL5_HUMAN	79	91	FAKQVINNAAATQ	12	1375.73	UCH37C88A_DEUBAD_K6/48 Ub3	30	1380.46	0.306785	3.68208	0.313297	4.12458	0.007431
UCHL5_HUMAN	79	91	FAKQVINNAAATQ	12	1375.73	UCH37C88A_DEUBAD_K6/48 Ub3	60	1381.17	0.260778	4.38839	0.268409	4.13127	0.013657
UCHL5_HUMAN	79	91	FAKQVINNAAATQ	12	1375.73	UCH37C88A_DEUBAD_K6/48 Ub3	120	1381.96	0.310977	5.18736	0.317403	4.12455	0.003858
UCHL5_HUMAN	79	91	FAKQVINNAAATQ	12	1375.73	UCH37C88A_DEUBAD_Ub	0	1376.78	0.063546	0	0	4.15013	0.037926
UCHL5_HUMAN	79	91	FAKQVINNAAATQ	12	1375.73	UCH37C88A_DEUBAD_Ub	1	1379.01	0.227221	2.23791	0.235939	4.11071	0.002687
UCHL5_HUMAN	79	91	FAKQVINNAAATQ	12	1375.73	UCH37C88A_DEUBAD_Ub	10	1380.81	0.577601	4.03568	0.581086	4.09314	0.002229
UCHL5_HUMAN	79	91	FAKQVINNAAATQ	12	1375.73	UCH37C88A_DEUBAD_Ub	30	1381.46	0.520772	4.68562	0.524634	4.09612	0.002086
UCHL5_HUMAN	79	91	FAKQVINNAAATQ	12	1375.73	UCH37C88A_DEUBAD_Ub	60	1381.98	0.650699	5.20339	0.653795	4.09588	0.003003
UCHL5_HUMAN	79	91	FAKQVINNAAATQ	12	1375.73	UCH37C88A_DEUBAD_Ub	120	1382.41	0.682959	5.62913	0.685909	4.09536	0.007595
UCHL5_HUMAN	79	92	FAKQVINNAAATQA	13	1446.77	UCH37C88A_DEUBAD	0	1447.75	0.096987	0	0	4.36173	0.031926
UCHL5_HUMAN	79	92	FAKQVINNAAATQA	13	1446.77	UCH37C88A_DEUBAD	1	1451.17	0.187718	3.42327	0.211293	4.3544	0.013229
UCHL5_HUMAN	79	92	FAKQVINNAAATQA	13	1446.77	UCH37C88A_DEUBAD	10	1453.5	0.319397	5.75559	0.333798	4.33793	0.020346
UCHL5_HUMAN	79	92	FAKQVINNAAATQA	13	1446.77	UCH37C88A_DEUBAD	30	1454.42	0.206153	6.6777	0.227828	4.33697	0.011897
UCHL5_HUMAN	79	92	FAKQVINNAAATQA	13	1446.77	UCH37C88A_DEUBAD	60	1454.84	0.228063	7.09613	0.247829	4.33572	0.012753
UCHL5_HUMAN	79	92	FAKQVINNAAATQA	13	1446.77	UCH37C88A_DEUBAD	120	1455.08	0.271494	7.32912	0.288298	4.33248	0.002497
UCHL5_HUMAN	79	92	FAKQVINNAAATQA	13	1446.77	UCH37C88A_DEUBAD_K48 Ub2	0	1447.75	0.096987	0	0	4.36173	0.031926
UCHL5_HUMAN	79	92	FAKQVINNAAATQA	13	1446.77	UCH37C88A_DEUBAD_K48 Ub2	1	1449.18	0.082174	1.43804	0.127119	4.34884	0.01628
UCHL5_HUMAN	79	92	FAKQVINNAAATQA	13	1446.77	UCH37C88A_DEUBAD_K48 Ub2	10	1449.82	0.323426	2.07206	0.337655	4.34329	0.015536
UCHL5_HUMAN	79	92	FAKQVINNAAATQA	13	1446.77	UCH37C88A_DEUBAD_K48 Ub2	30	1450.07	0.360792	2.3251	0.373601	4.34493	0.024796
UCHL5_HUMAN	79	92	FAKQVINNAAATQA	13	1446.77	UCH37C88A_DEUBAD_K48 Ub2	60	1450.15	0.315493	2.40402	0.330064	4.34057	0.017118
UCHL5_HUMAN	79	92	FAKQVINNAAATQA	13	1446.77	UCH37C88A_DEUBAD_K48 Ub2	120	1450.35	0.243883	2.59925	0.26246	4.33118	0.013341
UCHL5_HUMAN	79	92	FAKQVINNAAATQA	13	1446.77	UCH37C88A_DEUBAD_K48 Ub3	0	1447.75	0.096987	0	0	4.36173	0.031926
UCHL5_HUMAN	79	92	FAKQVINNAAATQA	13	1446.77	UCH37C88A_DEUBAD_K48 Ub3	1	1449.4	0.260051	1.65027	0.277548	4.34742	0.01701
UCHL5_HUMAN	79	92	FAKQVINNAAATQA	13	1446.77	UCH37C88A_DEUBAD_K48 Ub3	10	1449.78	0.231075	2.03402	0.250604	4.35021	0.004575
UCHL5_HUMAN	79	92	FAKQVINNAAATQA	13	1446.77	UCH37C88A_DEUBAD_K48 Ub3	30	1450.14	0.302881	2.39854	0.318031	4.35053	0.011353
UCHL5_HUMAN	79	92	FAKQVINNAAATQA	13	1446.77	UCH37C88A_DEUBAD_K48 Ub3	60	1450.42	0.429781	2.6758	0.440588	4.34823	0.006136
UCHL5_HUMAN	79	92	FAKQVINNAAATQA	13	1446.77	UCH37C88A_DEUBAD_K48 Ub3	120	1451.24	0.491594	3.48926	0.50107	4.34423	0.007386
UCHL5_HUMAN	79	92	FAKQVINNAAATQA	13	1446.77	UCH37C88A_DEUBAD_K6/48 Ub3	0	1447.75	0.096987	0	0	4.36173	0.031926
UCHL5_HUMAN	79	92	FAKQVINNAAATQA	13	1446.77	UCH37C88A_DEUBAD_K6/48 Ub3	1	1449.84	0.246533	2.09588	0.264925	4.35616	0.005676
UCHL5_HUMAN	79	92	FAKQVINNAAATQA	13	1446.77	UCH37C88A_DEUBAD_K6/48 Ub3	10	1450.67	0.293752	2.92646	0.309349	4.33285	0.003864
UCHL5_HUMAN	79	92	FAKQVINNAAATQA	13	1446.77	UCH37C88A_DEUBAD_K6/48 Ub3	30	1451.26	0.383054	3.5187	0.395142	4.33441	0.005717
UCHL5_HUMAN	79	92	FAKQVINNAAATQA	13	1446.77	UCH37C88A_DEUBAD_K6/48 Ub3	60	1452.03	0.234104	4.28009	0.253399	4.33306	0.008407
UCHL5_HUMAN	79	92	FAKQVINNAAATQA	13	1446.77	UCH37C88A_DEUBAD_K6/48 Ub3	120	1453.03	0.410669	5.28297	0.421967	4.32974	0.004896
UCHL5_HUMAN	79	92	FAKQVINNAAATQA	13	1446.77	UCH37C88A_DEUBAD_Ub	0	1447.78	0.07873	0	0	4.35941	0.032118
UCHL5_HUMAN	79	92	FAKQVINNAAATQA	13	1446.77	UCH37C88A_DEUBAD_Ub	1	1450.37	0.267558	2.593	0.278901	4.31621	0.002522
UCHL5_HUMAN	79	92	FAKQVINNAAATQA	13	1446.77	UCH37C88A_DEUBAD_Ub	10	1452.18	0.277226	4.39973	0.288188	4.32609	0.032685
UCHL5_HUMAN	79	92	FAKQVINNAAATQA	13	1446.77	UCH37C88A_DEUBAD_Ub	30	1453.07	0.136645	5.2946	0.157703	4.29382	0.00771
UCHL5_HUMAN	79	92	FAKQVINNAAATQA	13	1446.77	UCH37C88A_DEUBAD_Ub	60	1453.36	0.114634	5.58639	0.139066	4.3212	0.025839
UCHL5_HUMAN	79	92	FAKQVINNAAATQA	13	1446.77	UCH37C88A_DEUBAD_Ub	120	1453.7	0	5.92222	0.07873	4.30884	0
UCHL5_HUMAN	80	91	AKQVINNAAATQ	11	1228.66	UCH37C88A_DEUBAD	0	1229.36	0.06411	0	0	3.3026	0.01919
UCHL5_HUMAN	80	91	AKQVINNAAATQ	11	1228.66	UCH37C88A_DEUBAD	1	1232.63	0	3.26859	0.06411	3.27885	0
UCHL5_HUMAN	80	91	AKQVINNAAATQ	11	1228.66	UCH37C88A_DEUBAD	10	1235.02	0.191696	5.66149	0.202133	3.28611	0.012288
UCHL5_HUMAN	80	91	AKQVINNAAATQ	11	1228.66	UCH37C88A_DEUBAD	30	1235.89	0.01261	6.53392	0.065339	3.28666	0.00732
UCHL5_HUMAN	80	91	AKQVINNAAATQ	11	1228.66	UCH37C88A_DEUBAD	60	1236.32	0.007698	6.95876	0.064571	3.28411	0.008177
UCHL5_HUMAN	80	91	AKQVINNAAATQ	11	1228.66	UCH37C88A_DEUBAD	120	1236.55	0	7.19542	0.06411	3.27923	0
UCHL5_HUMAN	80	91	AKQVINNAAATQ	11	1228.66	UCH37C88A_DEUBAD_K48 Ub2	0	1229.36	0.06411	0	0	3.3026	0.01919
UCHL5_HUMAN	80	91	AKQVINNAAATQ	11	1228.66	UCH37C88A_DEUBAD_K48 Ub2	1	1230.74	0.079201	1.37883	0.101897	3.29532	0.010545
UCHL5_HUMAN	80	91	AKQVINNAAATQ	11	1228.66	UCH37C88A_DEUBAD_K48 Ub2	10	1231.29	0.06378	1.93505	0.090432	3.29283	0.006694
UCHL5_HUMAN	80	91	AKQVINNAAATQ	11	1228.66	UCH37C88A_DEUBAD_K48 Ub2	30	1231.57	0.252803	2.21379	0.260805	3.28549	0.013302
UCHL5_HUMAN	80	91	AKQVINNAAATQ	11	1228.66	UCH37C88A_DEUBAD_K48 Ub2	60	1231.7	0.255921	2.34058	0.263829	3.28781	0.010215
UCHL5_HUMAN	80	91	AKQVINNAAATQ	11	1228.66	UCH37C88A_DEUBAD_K48 Ub2	120	1231.84	0.009511	2.48503	0.064812	3.27966	0.008284
UCHL5_HUMAN	80	91	AKQVINNAAATQ	11	1228.66	UCH37C88A_DEUBAD_K48 Ub3	0	1229.36	0.06411	0	0	3.3026	0.01919
UCHL5_HUMAN	80	91	AKQVINNAAATQ	11	1228.66	UCH37C88A_DEUBAD_K48 Ub3	1	1230.9	0.062448	1.54066	0.089498	3.2902	0.012352
UCHL5_HUMAN	80	91	AKQVINNAAATQ	11	1228.66	UCH37C88A_DEUBAD_K48 Ub3	10	1231.42	0.15851	2.05914	0.170984	3.30023	0.006972
UCHL5_HUMAN	80	91	AKQVINNAAATQ	11	1228.66	UCH37C88A_DEUBAD_K48 Ub3	30	1231.67	0.254285	2.31191	0.262242	3.29872	0.00775
UCHL5_HUMAN	80	91	AKQVINNAAATQ	11	1228.66	UCH37C88A_DEUBAD_K48 Ub3	60	1232.21	0.139663	2.85649	0.153674	3.30017	0.003818
UCHL5_HUMAN	80	91	AKQVINNAAATQ	11	1228.66	UCH37C88A_DEUBAD_K48 Ub3	120	1232.74	0.079663	3.38597	0.102256	3.29658	0.008079
UCHL5_HUMAN	80	91	AKQVINNAAATQ	11	1228.66	UCH37C88A_DEUBAD_K6/48 Ub3	0	1229.36	0.06411	0	0	3.3026	0.01919
UCHL5_HUMAN	80	91	AKQVINNAAATQ	11	1228.66	UCH37C88A_DEUBAD_K6/48 Ub3	1	1231.37	0.24182	2.01587	0.250174	3.29494	0.001912
UCHL5_HUMAN	80	91	AKQVINNAAATQ	11	1228.66	UCH37C88A_DEUBAD_K6/48 Ub3	10	1232.25	0.17889	2.8939	0.190031	3.28458	0.000741
UCHL5_HUMAN	80	91	AKQVINNAAATQ	11	1228.66	UCH37C88A_DEUBAD_K6/48 Ub3	30	1232.83	0.138001	3.47659	0.152165	3.28156	0.001819
UCHL5_HUMAN	80	91	AKQVINNAAATQ	11	1228.66	UCH37C88A_DEUBAD_K6/48 Ub3	60	1233.47	0.061116	4.11433	0.088574	3.28209	0.0061
UCHL5_HUMAN	80	91	AKQVINNAAATQ	11	1228.66	UCH37C88A_DEUBAD_K6/48 Ub3	120	1234.38	0.267202	5.02599	0.274786	3.27982	0.003266
UCHL5_HUMAN	80	91	AKQVINNAAATQ	11	1228.66	UCH37C88A_DEUBAD_Ub	0	1229.36	0.06411	0	0	3.3026	0.01919
UCHL5_HUMAN	80	91	AKQVINNAAATQ	11	1228.66	UCH37C88A_DEUBAD_Ub	1	1231.54	0.173259	2.17838	0.18474	3.28408	0.01008
UCHL5_HUMAN	80	91	AKQVINNAAATQ	11	1228.66	UCH37C88A_DEUBAD_Ub	10	1232.71	0.14432	3.35703	0.157919	3.27935	0.015519
UCHL5_HUMAN	80	91	AKQVINNAAATQ	11	1228.66	UCH37C88A_DEUBAD_Ub	30	1233.7	0	4.33922	0.06411	3.27356	0
UCHL5_HUMAN	80	91	AKQVINNAAATQ	11	1228.66	UCH37C88A_DEUBAD_Ub	60	1234.01	0.126413	4.64987	0.14174	3.28117	0.009524
UCHL5_HUMAN	80	91	AKQVINNAAATQ	11	1228.66	UCH37C88A_DEUBAD_Ub	120	1234.61	0	5.2562	0.06411	3.27663	0
UCHL5_HUMAN	80	92	AKQVINNAAATQA	12	1299.7	UCH37C88A_DEUBAD	0	1300.39	0.055395	0	0	3.58958	0.017773
UCHL5_HUMAN	80	92	AKQVINNAAATQA	12	1299.7	UCH37C88A_DEUBAD	1	1303.56	0.125401	3.1723	0.137091	3.59031	0.01359
UCHL5_HUMAN	80	92	AKQVINNAAATQA	12	1299.7	UCH37C88A_DEUBAD	10	1306.25	0	5.86645	0.055395	3.5755	0
UCHL5_HUMAN	80	92	AKQVINNAAATQA	12	1299.7	UCH37C88A_DEUBAD	30	1306.97	0.053121	6.58415	0.076749	3.58771	0.010085
UCHL5_HUMAN	80	92	AKQVINNAAATQA	12	1299.7	UCH37C88A_DEUBAD	60	1307.42	0.045254	7.03264	0.07153	3.58618	0.007634
UCHL5_HUMAN	80	92	AKQVINNAAATQA	12	1299.7	UCH37C88A_DEUBAD	120	1307.73	2.27374e-13	7.34664	0.055395	3.58207	0
UCHL5_HUMAN	80	92	AKQVINNAAATQA	12	1299.7	UCH37C88A_DEUBAD_K48 Ub2	0	1300.39	0.055395	0	0	3.58958	0.017773
UCHL5_HUMAN	80	92	AKQVINNAAATQA	12	1299.7	UCH37C88A_DEUBAD_K48 Ub2	1	1301.86	0.085718	1.47139	0.102059	3.59126	0.015552
UCHL5_HUMAN	80	92	AKQVINNAAATQA	12	1299.7	UCH37C88A_DEUBAD_K48 Ub2	10	1302.28	0.059984	1.88865	0.081649	3.58984	0.01064
UCHL5_HUMAN	80	92	AKQVINNAAATQA	12	1299.7	UCH37C88A_DEUBAD_K48 Ub2	30	1302.34	0.034881	1.95785	0.065462	3.58655	0.015698
UCHL5_HUMAN	80	92	AKQVINNAAATQA	12	1299.7	UCH37C88A_DEUBAD_K48 Ub2	60	1302.49	0.044841	2.10668	0.071269	3.58989	0.01079
UCHL5_HUMAN	80	92	AKQVINNAAATQA	12	1299.7	UCH37C88A_DEUBAD_K48 Ub2	120	1302.71	0.00618	2.32158	0.055738	3.5792	0.006419
UCHL5_HUMAN	80	92	AKQVINNAAATQA	12	1299.7	UCH37C88A_DEUBAD_K48 Ub3	0	1300.39	0.055395	0	0	3.58958	0.017773
UCHL5_HUMAN	80	92	AKQVINNAAATQA	12	1299.7	UCH37C88A_DEUBAD_K48 Ub3	1	1302	0.107454	1.61254	0.120893	3.5896	0.012673
UCHL5_HUMAN	80	92	AKQVINNAAATQA	12	1299.7	UCH37C88A_DEUBAD_K48 Ub3	10	1302.3	0.051312	1.91084	0.075508	3.59519	0.00502
UCHL5_HUMAN	80	92	AKQVINNAAATQA	12	1299.7	UCH37C88A_DEUBAD_K48 Ub3	30	1302.37	0.137729	1.98194	0.148451	3.59651	0.008203
UCHL5_HUMAN	80	92	AKQVINNAAATQA	12	1299.7	UCH37C88A_DEUBAD_K48 Ub3	60	1302.6	0.121592	2.20996	0.133616	3.59595	0.004961
UCHL5_HUMAN	80	92	AKQVINNAAATQA	12	1299.7	UCH37C88A_DEUBAD_K48 Ub3	120	1302.82	0.104553	2.42885	0.118321	3.58963	0.009065
UCHL5_HUMAN	80	92	AKQVINNAAATQA	12	1299.7	UCH37C88A_DEUBAD_K6/48 Ub3	0	1300.39	0.055395	0	0	3.58958	0.017773
UCHL5_HUMAN	80	92	AKQVINNAAATQA	12	1299.7	UCH37C88A_DEUBAD_K6/48 Ub3	1	1302.3	0.351574	1.91717	0.355911	3.59657	0.005154
UCHL5_HUMAN	80	92	AKQVINNAAATQA	12	1299.7	UCH37C88A_DEUBAD_K6/48 Ub3	10	1302.56	0.087909	2.1769	0.103907	3.58473	0.001048
UCHL5_HUMAN	80	92	AKQVINNAAATQA	12	1299.7	UCH37C88A_DEUBAD_K6/48 Ub3	30	1303.06	0.288528	2.67443	0.293797	3.58307	0.00227
UCHL5_HUMAN	80	92	AKQVINNAAATQA	12	1299.7	UCH37C88A_DEUBAD_K6/48 Ub3	60	1303.38	0.330097	2.99025	0.334713	3.58193	0.003186
UCHL5_HUMAN	80	92	AKQVINNAAATQA	12	1299.7	UCH37C88A_DEUBAD_K6/48 Ub3	120	1303.55	0.068624	3.16434	0.088192	3.58495	0.000336
UCHL5_HUMAN	80	92	AKQVINNAAATQA	12	1299.7	UCH37C88A_DEUBAD_Ub	0	1300.39	0.055395	0	0	3.58958	0.017773
UCHL5_HUMAN	80	92	AKQVINNAAATQA	12	1299.7	UCH37C88A_DEUBAD_Ub	1	1302.25	0.150758	1.86101	0.160613	3.57886	0.010727
UCHL5_HUMAN	80	92	AKQVINNAAATQA	12	1299.7	UCH37C88A_DEUBAD_Ub	10	1303.25	0	2.86636	0.055395	3.60801	0
UCHL5_HUMAN	80	92	AKQVINNAAATQA	12	1299.7	UCH37C88A_DEUBAD_Ub	30	1304.29	0.218065	3.90126	0.224991	3.57666	0.017076
UCHL5_HUMAN	80	92	AKQVINNAAATQA	12	1299.7	UCH37C88A_DEUBAD_Ub	60	1304.95	0.207757	4.5649	0.215015	3.5688	0.003058
UCHL5_HUMAN	80	92	AKQVINNAAATQA	12	1299.7	UCH37C88A_DEUBAD_Ub	120	1305.81	0	5.41941	0.055395	3.56913	0
UCHL5_HUMAN	84	93	INNAAATQAI	9	986.527	UCH37C88A_DEUBAD	0	987.345	0.28876	0	0	3.91346	0.030588
UCHL5_HUMAN	84	93	INNAAATQAI	9	986.527	UCH37C88A_DEUBAD	1	989.648	0.322745	2.3038	0.433066	3.91061	0.023865
UCHL5_HUMAN	84	93	INNAAATQAI	9	986.527	UCH37C88A_DEUBAD	10	991.299	0.027658	3.95476	0.290081	3.90646	0.025108
UCHL5_HUMAN	84	93	INNAAATQAI	9	986.527	UCH37C88A_DEUBAD	30	991.639	0.083162	4.29389	0.300496	3.89949	0.017378
UCHL5_HUMAN	84	93	INNAAATQAI	9	986.527	UCH37C88A_DEUBAD	60	991.687	0.081282	4.34241	0.299982	3.90634	0.017561
UCHL5_HUMAN	84	93	INNAAATQAI	9	986.527	UCH37C88A_DEUBAD	120	991.563	0.043656	4.21842	0.292041	3.89518	0.000109
UCHL5_HUMAN	84	93	INNAAATQAI	9	986.527	UCH37C88A_DEUBAD_K48 Ub2	0	987.258	0.098565	0	0	3.91001	0.030492
UCHL5_HUMAN	84	93	INNAAATQAI	9	986.527	UCH37C88A_DEUBAD_K48 Ub2	1	989.378	0.049676	2.12021	0.110375	3.89824	0.022108
UCHL5_HUMAN	84	93	INNAAATQAI	9	986.527	UCH37C88A_DEUBAD_K48 Ub2	10	991.31	0.060066	4.05214	0.115425	3.89192	0.023113
UCHL5_HUMAN	84	93	INNAAATQAI	9	986.527	UCH37C88A_DEUBAD_K48 Ub2	30	991.717	0.080389	4.45881	0.127191	3.88332	0.023996
UCHL5_HUMAN	84	93	INNAAATQAI	9	986.527	UCH37C88A_DEUBAD_K48 Ub2	60	991.729	0.075648	4.47086	0.124249	3.8897	0.023701
UCHL5_HUMAN	84	93	INNAAATQAI	9	986.527	UCH37C88A_DEUBAD_K48 Ub2	120	991.737	0.03099	4.47958	0.103322	3.87046	0.017554
UCHL5_HUMAN	84	93	INNAAATQAI	9	986.527	UCH37C88A_DEUBAD_K48 Ub3	0	987.258	0.098565	0	0	3.91001	0.030492
UCHL5_HUMAN	84	93	INNAAATQAI	9	986.527	UCH37C88A_DEUBAD_K48 Ub3	1	989.46	0.14104	2.20178	0.172067	3.89053	0.026828
UCHL5_HUMAN	84	93	INNAAATQAI	9	986.527	UCH37C88A_DEUBAD_K48 Ub3	10	991.218	0.116535	3.96049	0.152628	3.89127	0.013761
UCHL5_HUMAN	84	93	INNAAATQAI	9	986.527	UCH37C88A_DEUBAD_K48 Ub3	30	991.637	0.012606	4.37886	0.099368	3.89415	0.017376
UCHL5_HUMAN	84	93	INNAAATQAI	9	986.527	UCH37C88A_DEUBAD_K48 Ub3	60	991.755	0.064424	4.49662	0.117752	3.89091	0.01022
UCHL5_HUMAN	84	93	INNAAATQAI	9	986.527	UCH37C88A_DEUBAD_K48 Ub3	120	991.722	0.085023	4.46379	0.130169	3.87943	0.004535
UCHL5_HUMAN	84	93	INNAAATQAI	9	986.527	UCH37C88A_DEUBAD_K6/48 Ub3	0	987.258	0.098565	0	0	3.91001	0.030492
UCHL5_HUMAN	84	93	INNAAATQAI	9	986.527	UCH37C88A_DEUBAD_K6/48 Ub3	1	989.423	0.106537	2.16529	0.145139	3.89636	0.015745
UCHL5_HUMAN	84	93	INNAAATQAI	9	986.527	UCH37C88A_DEUBAD_K6/48 Ub3	10	991.317	0.034126	4.05907	0.104305	3.88553	0.020916
UCHL5_HUMAN	84	93	INNAAATQAI	9	986.527	UCH37C88A_DEUBAD_K6/48 Ub3	30	991.715	0.04817	4.45757	0.109706	3.8853	0.019152
UCHL5_HUMAN	84	93	INNAAATQAI	9	986.527	UCH37C88A_DEUBAD_K6/48 Ub3	60	991.804	0.052219	4.54631	0.111543	3.88879	0.024004
UCHL5_HUMAN	84	93	INNAAATQAI	9	986.527	UCH37C88A_DEUBAD_K6/48 Ub3	120	991.726	0.058214	4.46772	0.114472	3.87906	0.003892
UCHL5_HUMAN	84	93	INNAAATQAI	9	986.527	UCH37C88A_DEUBAD_Ub	0	987.258	0.098565	0	0	3.91001	0.030492
UCHL5_HUMAN	84	93	INNAAATQAI	9	986.527	UCH37C88A_DEUBAD_Ub	1	989.777	0.182317	2.51956	0.207255	3.82786	0.006795
UCHL5_HUMAN	84	93	INNAAATQAI	9	986.527	UCH37C88A_DEUBAD_Ub	10	991.173	0.301332	3.91466	0.317042	3.83913	0.04128
UCHL5_HUMAN	84	93	INNAAATQAI	9	986.527	UCH37C88A_DEUBAD_Ub	30	991.328	0.305131	4.0701	0.320656	3.83485	0.041925
UCHL5_HUMAN	84	93	INNAAATQAI	9	986.527	UCH37C88A_DEUBAD_Ub	60	991.375	0.710152	4.11742	0.716959	3.81954	0.008852
UCHL5_HUMAN	84	93	INNAAATQAI	9	986.527	UCH37C88A_DEUBAD_Ub	120	991.365	0.514016	4.10733	0.523381	3.8211	0.007239
UCHL5_HUMAN	96	103	VLLNCTHQ	7	927.472	UCH37C88A_DEUBAD	0	928.014	0.050295	0	0	4.65307	0.037249
UCHL5_HUMAN	96	103	VLLNCTHQ	7	927.472	UCH37C88A_DEUBAD	1	929.807	0.17298	1.79309	0.180144	4.65121	0.021726
UCHL5_HUMAN	96	103	VLLNCTHQ	7	927.472	UCH37C88A_DEUBAD	10	929.878	0.05178	1.8648	0.072186	4.65778	0.019341
UCHL5_HUMAN	96	103	VLLNCTHQ	7	927.472	UCH37C88A_DEUBAD	30	930.122	0.028578	2.10808	0.057847	4.65107	0.014935
UCHL5_HUMAN	96	103	VLLNCTHQ	7	927.472	UCH37C88A_DEUBAD	60	930.288	0.058115	2.27448	0.076857	4.64925	0.013107
UCHL5_HUMAN	96	103	VLLNCTHQ	7	927.472	UCH37C88A_DEUBAD	120	930.246	0.055137	2.23205	0.07463	4.64782	0.001042
UCHL5_HUMAN	96	103	VLLNCTHQ	7	927.472	UCH37C88A_DEUBAD_K48 Ub2	0	928.014	0.050295	0	0	4.65307	0.037249
UCHL5_HUMAN	96	103	VLLNCTHQ	7	927.472	UCH37C88A_DEUBAD_K48 Ub2	1	929.654	0.060302	1.64022	0.078523	4.65373	0.010226
UCHL5_HUMAN	96	103	VLLNCTHQ	7	927.472	UCH37C88A_DEUBAD_K48 Ub2	10	930.14	0.101317	2.12583	0.113114	4.65236	0.009931
UCHL5_HUMAN	96	103	VLLNCTHQ	7	927.472	UCH37C88A_DEUBAD_K48 Ub2	30	930.241	0.076047	2.22689	0.091174	4.64738	0.015583
UCHL5_HUMAN	96	103	VLLNCTHQ	7	927.472	UCH37C88A_DEUBAD_K48 Ub2	60	930.335	0.12402	2.3211	0.133831	4.64498	0.012181
UCHL5_HUMAN	96	103	VLLNCTHQ	7	927.472	UCH37C88A_DEUBAD_K48 Ub2	120	930.222	0.114759	2.20879	0.125296	4.63259	0.005268
UCHL5_HUMAN	96	103	VLLNCTHQ	7	927.472	UCH37C88A_DEUBAD_K48 Ub3	0	928.014	0.050295	0	0	4.65307	0.037249
UCHL5_HUMAN	96	103	VLLNCTHQ	7	927.472	UCH37C88A_DEUBAD_K48 Ub3	1	929.682	0.146579	1.66808	0.154967	4.65037	0.007338
UCHL5_HUMAN	96	103	VLLNCTHQ	7	927.472	UCH37C88A_DEUBAD_K48 Ub3	10	929.823	0.113382	1.80884	0.124036	4.65575	0.01113
UCHL5_HUMAN	96	103	VLLNCTHQ	7	927.472	UCH37C88A_DEUBAD_K48 Ub3	30	930.114	0.205491	2.10038	0.211557	4.65883	0.009792
UCHL5_HUMAN	96	103	VLLNCTHQ	7	927.472	UCH37C88A_DEUBAD_K48 Ub3	60	930.268	0.106193	2.2545	0.117501	4.65405	0.007615
UCHL5_HUMAN	96	103	VLLNCTHQ	7	927.472	UCH37C88A_DEUBAD_K48 Ub3	120	930.225	0.085175	2.21121	0.098916	4.65147	0.011085
UCHL5_HUMAN	96	103	VLLNCTHQ	7	927.472	UCH37C88A_DEUBAD_K6/48 Ub3	0	928.02	0.035486	0	0	4.65393	0.037359
UCHL5_HUMAN	96	103	VLLNCTHQ	7	927.472	UCH37C88A_DEUBAD_K6/48 Ub3	1	929.7	0.091608	1.68088	0.098241	4.66011	0.006991
UCHL5_HUMAN	96	103	VLLNCTHQ	7	927.472	UCH37C88A_DEUBAD_K6/48 Ub3	10	930.114	0.129841	2.09458	0.134603	4.64804	0.007666
UCHL5_HUMAN	96	103	VLLNCTHQ	7	927.472	UCH37C88A_DEUBAD_K6/48 Ub3	30	930.235	0.121315	2.21583	0.126398	4.64858	0.007383
UCHL5_HUMAN	96	103	VLLNCTHQ	7	927.472	UCH37C88A_DEUBAD_K6/48 Ub3	60	930.393	0.004045	2.37323	0.035716	4.65454	0.007709
UCHL5_HUMAN	96	103	VLLNCTHQ	7	927.472	UCH37C88A_DEUBAD_K6/48 Ub3	120	930.413	0.058372	2.39333	0.068313	4.64322	0.006598
UCHL5_HUMAN	96	103	VLLNCTHQ	7	927.472	UCH37C88A_DEUBAD_Ub	0	927.792	0	0	0	4.62065	0
UCHL5_HUMAN	96	103	VLLNCTHQ	7	927.472	UCH37C88A_DEUBAD_Ub	1	929.598	0.073048	1.80586	0.073048	4.5347	0.005984
UCHL5_HUMAN	96	103	VLLNCTHQ	7	927.472	UCH37C88A_DEUBAD_Ub	10	929.633	0.002697	1.84083	0.002697	4.51633	0.001484
UCHL5_HUMAN	96	103	VLLNCTHQ	7	927.472	UCH37C88A_DEUBAD_Ub	30	930.146	0.038738	2.35333	0.038738	4.51993	0.000726
UCHL5_HUMAN	96	103	VLLNCTHQ	7	927.472	UCH37C88A_DEUBAD_Ub	60	930.087	0.051954	2.29504	0.051954	4.52832	0.004092
UCHL5_HUMAN	96	103	VLLNCTHQ	7	927.472	UCH37C88A_DEUBAD_Ub	120	930.065	0	2.27309	0	4.53193	0
UCHL5_HUMAN	96	107	VLLNCTHQDVHL	11	1391.71	UCH37C88A_DEUBAD	0	1392.6	0.134363	0	0	5.5756	0.049519
UCHL5_HUMAN	96	107	VLLNCTHQDVHL	11	1391.71	UCH37C88A_DEUBAD	1	1394.93	0.202216	2.32876	0.242786	5.57758	0.022362
UCHL5_HUMAN	96	107	VLLNCTHQDVHL	11	1391.71	UCH37C88A_DEUBAD	10	1394.91	0.127571	2.30579	0.185278	5.57519	0.012658
UCHL5_HUMAN	96	107	VLLNCTHQDVHL	11	1391.71	UCH37C88A_DEUBAD	30	1395.11	0.107598	2.50777	0.172136	5.56696	0.017252
UCHL5_HUMAN	96	107	VLLNCTHQDVHL	11	1391.71	UCH37C88A_DEUBAD	60	1395.3	0.08003	2.69754	0.156391	5.57374	0.008089
UCHL5_HUMAN	96	107	VLLNCTHQDVHL	11	1391.71	UCH37C88A_DEUBAD	120	1395.37	0.057918	2.76677	0.146315	5.56431	0.001906
UCHL5_HUMAN	96	107	VLLNCTHQDVHL	11	1391.71	UCH37C88A_DEUBAD_K48 Ub2	0	1392.6	0.134363	0	0	5.5756	0.049519
UCHL5_HUMAN	96	107	VLLNCTHQDVHL	11	1391.71	UCH37C88A_DEUBAD_K48 Ub2	1	1394.71	0.076147	2.10955	0.15444	5.57055	0.00474
UCHL5_HUMAN	96	107	VLLNCTHQDVHL	11	1391.71	UCH37C88A_DEUBAD_K48 Ub2	10	1395.08	0.16441	2.48423	0.21233	5.56152	0.009158
UCHL5_HUMAN	96	107	VLLNCTHQDVHL	11	1391.71	UCH37C88A_DEUBAD_K48 Ub2	30	1395.43	0.085972	2.82891	0.159514	5.5547	0.018523
UCHL5_HUMAN	96	107	VLLNCTHQDVHL	11	1391.71	UCH37C88A_DEUBAD_K48 Ub2	60	1395.58	0.186141	2.9824	0.229569	5.56204	0.013302
UCHL5_HUMAN	96	107	VLLNCTHQDVHL	11	1391.71	UCH37C88A_DEUBAD_K48 Ub2	120	1395.59	0.147803	2.99401	0.199748	5.55507	0.006629
UCHL5_HUMAN	96	107	VLLNCTHQDVHL	11	1391.71	UCH37C88A_DEUBAD_K48 Ub3	0	1392.6	0.134363	0	0	5.5756	0.049519
UCHL5_HUMAN	96	107	VLLNCTHQDVHL	11	1391.71	UCH37C88A_DEUBAD_K48 Ub3	1	1394.81	0.157194	2.21369	0.206793	5.5761	0.006085
UCHL5_HUMAN	96	107	VLLNCTHQDVHL	11	1391.71	UCH37C88A_DEUBAD_K48 Ub3	10	1395.08	0.147136	2.48073	0.199255	5.5791	0.007316
UCHL5_HUMAN	96	107	VLLNCTHQDVHL	11	1391.71	UCH37C88A_DEUBAD_K48 Ub3	30	1395.37	0.171587	2.77082	0.217934	5.57689	0.008325
UCHL5_HUMAN	96	107	VLLNCTHQDVHL	11	1391.71	UCH37C88A_DEUBAD_K48 Ub3	60	1395.49	0.118562	2.88782	0.179194	5.57888	0.006969
UCHL5_HUMAN	96	107	VLLNCTHQDVHL	11	1391.71	UCH37C88A_DEUBAD_K48 Ub3	120	1395.66	0.116383	3.058	0.17776	5.56879	0.011114
UCHL5_HUMAN	96	107	VLLNCTHQDVHL	11	1391.71	UCH37C88A_DEUBAD_K6/48 Ub3	0	1392.6	0.134363	0	0	5.5756	0.049519
UCHL5_HUMAN	96	107	VLLNCTHQDVHL	11	1391.71	UCH37C88A_DEUBAD_K6/48 Ub3	1	1394.83	0.085313	2.22576	0.15916	5.58795	0.007669
UCHL5_HUMAN	96	107	VLLNCTHQDVHL	11	1391.71	UCH37C88A_DEUBAD_K6/48 Ub3	10	1395.16	0.146304	2.56184	0.198641	5.56796	0.005216
UCHL5_HUMAN	96	107	VLLNCTHQDVHL	11	1391.71	UCH37C88A_DEUBAD_K6/48 Ub3	30	1395.45	0.097375	2.84723	0.165938	5.56756	0.006576
UCHL5_HUMAN	96	107	VLLNCTHQDVHL	11	1391.71	UCH37C88A_DEUBAD_K6/48 Ub3	60	1395.62	0.158061	3.01539	0.207453	5.57477	0.014604
UCHL5_HUMAN	96	107	VLLNCTHQDVHL	11	1391.71	UCH37C88A_DEUBAD_K6/48 Ub3	120	1395.86	0.132565	3.26275	0.188751	5.57254	0.005774
UCHL5_HUMAN	96	107	VLLNCTHQDVHL	11	1391.71	UCH37C88A_DEUBAD_Ub	0	1392.6	0.134363	0	0	5.5756	0.049519
UCHL5_HUMAN	96	107	VLLNCTHQDVHL	11	1391.71	UCH37C88A_DEUBAD_Ub	1	1394.87	0.193541	2.267	0.235609	5.53285	0.042495
UCHL5_HUMAN	96	107	VLLNCTHQDVHL	11	1391.71	UCH37C88A_DEUBAD_Ub	10	1395.17	0.221673	2.57152	0.259215	5.52246	0.04912
UCHL5_HUMAN	96	107	VLLNCTHQDVHL	11	1391.71	UCH37C88A_DEUBAD_Ub	30	1395.56	0.168828	2.95668	0.215769	5.52484	0.049838
UCHL5_HUMAN	96	107	VLLNCTHQDVHL	11	1391.71	UCH37C88A_DEUBAD_Ub	60	1395.52	0.212587	2.91769	0.251489	5.52335	0.043407
UCHL5_HUMAN	96	107	VLLNCTHQDVHL	11	1391.71	UCH37C88A_DEUBAD_Ub	120	1395.56	0.158004	2.95746	0.20741	5.49332	0.003688
UCHL5_HUMAN	96	108	VLLNCTHQDVHLG	12	1448.73	UCH37C88A_DEUBAD	0	1449.18	0.008774	0	0	6.74729	0.039106
UCHL5_HUMAN	96	108	VLLNCTHQDVHLG	12	1448.73	UCH37C88A_DEUBAD	1	1450.88	0.013009	1.69558	0.015691	6.71962	0.029437
UCHL5_HUMAN	96	108	VLLNCTHQDVHLG	12	1448.73	UCH37C88A_DEUBAD	10	1452.37	0.074873	3.18161	0.075386	6.71782	0.0284
UCHL5_HUMAN	96	108	VLLNCTHQDVHLG	12	1448.73	UCH37C88A_DEUBAD	30	1452.99	0.158267	3.80328	0.15851	6.71836	0.019407
UCHL5_HUMAN	96	108	VLLNCTHQDVHLG	12	1448.73	UCH37C88A_DEUBAD	60	1453.25	0.008119	4.06927	0.011954	6.7235	0.020153
UCHL5_HUMAN	96	108	VLLNCTHQDVHLG	12	1448.73	UCH37C88A_DEUBAD	120	1453.52	0	4.3316	0.008774	6.71033	0
UCHL5_HUMAN	96	108	VLLNCTHQDVHLG	12	1448.73	UCH37C88A_DEUBAD_K48 Ub2	0	1449.18	0.008774	0	0	6.74729	0.039106
UCHL5_HUMAN	96	108	VLLNCTHQDVHLG	12	1448.73	UCH37C88A_DEUBAD_K48 Ub2	1	1450.74	0	1.55435	0.008774	6.70069	0
UCHL5_HUMAN	96	108	VLLNCTHQDVHLG	12	1448.73	UCH37C88A_DEUBAD_K48 Ub2	10	1452.03	0.131638	2.84793	0.13193	6.71555	0.018918
UCHL5_HUMAN	96	108	VLLNCTHQDVHLG	12	1448.73	UCH37C88A_DEUBAD_K48 Ub2	30	1452.81	0.006454	3.62207	0.010892	6.71243	0.029732
UCHL5_HUMAN	96	108	VLLNCTHQDVHLG	12	1448.73	UCH37C88A_DEUBAD_K48 Ub2	60	1452.8	0.037203	3.61519	0.038224	6.72024	0.015427
UCHL5_HUMAN	96	108	VLLNCTHQDVHLG	12	1448.73	UCH37C88A_DEUBAD_K48 Ub2	120	1453.52	0.172526	4.33683	0.172749	6.69028	0.009964
UCHL5_HUMAN	96	108	VLLNCTHQDVHLG	12	1448.73	UCH37C88A_DEUBAD_K48 Ub3	0	1449.19	0.001679	0	0	6.75641	0.032026
UCHL5_HUMAN	96	108	VLLNCTHQDVHLG	12	1448.73	UCH37C88A_DEUBAD_K48 Ub3	1	1450.96	0.108502	1.77646	0.108515	6.70524	0.029916
UCHL5_HUMAN	96	108	VLLNCTHQDVHLG	12	1448.73	UCH37C88A_DEUBAD_K48 Ub3	10	1452.24	0.207024	3.04893	0.207031	6.72639	0.00993
UCHL5_HUMAN	96	108	VLLNCTHQDVHLG	12	1448.73	UCH37C88A_DEUBAD_K48 Ub3	30	1452.7	0.131976	3.51723	0.131987	6.73239	0.004848
UCHL5_HUMAN	96	108	VLLNCTHQDVHLG	12	1448.73	UCH37C88A_DEUBAD_K48 Ub3	60	1453.23	0.184957	4.04163	0.184965	6.7289	0.009446
UCHL5_HUMAN	96	108	VLLNCTHQDVHLG	12	1448.73	UCH37C88A_DEUBAD_K48 Ub3	120	1453.57	0.109532	4.38116	0.109545	6.72342	0.016595
UCHL5_HUMAN	96	108	VLLNCTHQDVHLG	12	1448.73	UCH37C88A_DEUBAD_K6/48 Ub3	0	1449.18	0.008774	0	0	6.74729	0.039106
UCHL5_HUMAN	96	108	VLLNCTHQDVHLG	12	1448.73	UCH37C88A_DEUBAD_K6/48 Ub3	1	1450.91	0.121872	1.72887	0.122188	6.71836	0.009702
UCHL5_HUMAN	96	108	VLLNCTHQDVHLG	12	1448.73	UCH37C88A_DEUBAD_K6/48 Ub3	10	1452.24	0.043021	3.05756	0.043906	6.7025	0.012364
UCHL5_HUMAN	96	108	VLLNCTHQDVHLG	12	1448.73	UCH37C88A_DEUBAD_K6/48 Ub3	30	1452.94	0.21161	3.76054	0.211792	6.7054	0.010879
UCHL5_HUMAN	96	108	VLLNCTHQDVHLG	12	1448.73	UCH37C88A_DEUBAD_K6/48 Ub3	60	1453.14	0.176576	3.95598	0.176794	6.70829	0.013215
UCHL5_HUMAN	96	108	VLLNCTHQDVHLG	12	1448.73	UCH37C88A_DEUBAD_K6/48 Ub3	120	1453.7	0.101288	4.51921	0.101668	6.70073	0.003958
UCHL5_HUMAN	96	108	VLLNCTHQDVHLG	12	1448.73	UCH37C88A_DEUBAD_Ub	0	1449.43	0.131176	0	0	6.74991	0.036832
UCHL5_HUMAN	96	108	VLLNCTHQDVHLG	12	1448.73	UCH37C88A_DEUBAD_Ub	1	1450.73	0.148845	1.30204	0.198398	6.61291	0.030472
UCHL5_HUMAN	96	108	VLLNCTHQDVHLG	12	1448.73	UCH37C88A_DEUBAD_Ub	10	1451.73	0.103195	2.29937	0.166903	6.61202	0.037303
UCHL5_HUMAN	96	108	VLLNCTHQDVHLG	12	1448.73	UCH37C88A_DEUBAD_Ub	30	1452.61	0.113094	3.17784	0.173198	6.62086	0.053535
UCHL5_HUMAN	96	108	VLLNCTHQDVHLG	12	1448.73	UCH37C88A_DEUBAD_Ub	60	1452.85	0.270277	3.41886	0.300428	6.61647	0.038088
UCHL5_HUMAN	96	108	VLLNCTHQDVHLG	12	1448.73	UCH37C88A_DEUBAD_Ub	120	1453.12	0.098951	3.68951	0.164312	6.60219	0.004945
UCHL5_HUMAN	96	110	VLLNCTHQDVHLGET	14	1678.82	UCH37C88A_DEUBAD	0	1679.86	0.113226	0	0	5.31136	0.039706
UCHL5_HUMAN	96	110	VLLNCTHQDVHLGET	14	1678.82	UCH37C88A_DEUBAD	1	1683.59	0.204132	3.7268	0.233431	5.30889	0.021871
UCHL5_HUMAN	96	110	VLLNCTHQDVHLGET	14	1678.82	UCH37C88A_DEUBAD	10	1683.6	0.028924	3.73718	0.116862	5.30785	0.01902
UCHL5_HUMAN	96	110	VLLNCTHQDVHLGET	14	1678.82	UCH37C88A_DEUBAD	30	1683.81	0.039065	3.95235	0.119776	5.30124	0.014128
UCHL5_HUMAN	96	110	VLLNCTHQDVHLGET	14	1678.82	UCH37C88A_DEUBAD	60	1683.96	0.052961	4.10458	0.125	5.31116	0.011551
UCHL5_HUMAN	96	110	VLLNCTHQDVHLGET	14	1678.82	UCH37C88A_DEUBAD	120	1684	0.046828	4.14053	0.122528	5.30222	0.000797
UCHL5_HUMAN	96	110	VLLNCTHQDVHLGET	14	1678.82	UCH37C88A_DEUBAD_K48 Ub2	0	1679.86	0.113226	0	0	5.31136	0.039706
UCHL5_HUMAN	96	110	VLLNCTHQDVHLGET	14	1678.82	UCH37C88A_DEUBAD_K48 Ub2	1	1683.36	0.024424	3.4963	0.11583	5.30324	0.005928
UCHL5_HUMAN	96	110	VLLNCTHQDVHLGET	14	1678.82	UCH37C88A_DEUBAD_K48 Ub2	10	1683.89	0.247858	4.02527	0.272496	5.29233	0.010297
UCHL5_HUMAN	96	110	VLLNCTHQDVHLGET	14	1678.82	UCH37C88A_DEUBAD_K48 Ub2	30	1684.06	0.113766	4.2046	0.160508	5.29316	0.01775
UCHL5_HUMAN	96	110	VLLNCTHQDVHLGET	14	1678.82	UCH37C88A_DEUBAD_K48 Ub2	60	1684.23	0.222441	4.36987	0.2496	5.29739	0.012564
UCHL5_HUMAN	96	110	VLLNCTHQDVHLGET	14	1678.82	UCH37C88A_DEUBAD_K48 Ub2	120	1684.26	0.10987	4.39872	0.157771	5.28209	0.010376
UCHL5_HUMAN	96	110	VLLNCTHQDVHLGET	14	1678.82	UCH37C88A_DEUBAD_K48 Ub3	0	1679.86	0.113226	0	0	5.31136	0.039706
UCHL5_HUMAN	96	110	VLLNCTHQDVHLGET	14	1678.82	UCH37C88A_DEUBAD_K48 Ub3	1	1683.47	0.202952	3.608	0.2324	5.30555	0.013236
UCHL5_HUMAN	96	110	VLLNCTHQDVHLGET	14	1678.82	UCH37C88A_DEUBAD_K48 Ub3	10	1683.77	0.185441	3.90948	0.217275	5.30719	0.007861
UCHL5_HUMAN	96	110	VLLNCTHQDVHLGET	14	1678.82	UCH37C88A_DEUBAD_K48 Ub3	30	1683.99	0.174162	4.13428	0.207732	5.30513	0.014377
UCHL5_HUMAN	96	110	VLLNCTHQDVHLGET	14	1678.82	UCH37C88A_DEUBAD_K48 Ub3	60	1684.19	0.12368	4.32787	0.167681	5.30244	0.010379
UCHL5_HUMAN	96	110	VLLNCTHQDVHLGET	14	1678.82	UCH37C88A_DEUBAD_K48 Ub3	120	1684.27	0.071747	4.40751	0.134044	5.29708	0.015552
UCHL5_HUMAN	96	110	VLLNCTHQDVHLGET	14	1678.82	UCH37C88A_DEUBAD_K6/48 Ub3	0	1679.86	0.113226	0	0	5.31136	0.039706
UCHL5_HUMAN	96	110	VLLNCTHQDVHLGET	14	1678.82	UCH37C88A_DEUBAD_K6/48 Ub3	1	1683.47	0.054098	3.61406	0.125486	5.3119	0.008098
UCHL5_HUMAN	96	110	VLLNCTHQDVHLGET	14	1678.82	UCH37C88A_DEUBAD_K6/48 Ub3	10	1683.84	0.123358	3.9819	0.167443	5.2948	0.011254
UCHL5_HUMAN	96	110	VLLNCTHQDVHLGET	14	1678.82	UCH37C88A_DEUBAD_K6/48 Ub3	30	1684.11	0.080085	4.24962	0.138686	5.29645	0.011279
UCHL5_HUMAN	96	110	VLLNCTHQDVHLGET	14	1678.82	UCH37C88A_DEUBAD_K6/48 Ub3	60	1684.28	0.1634	4.41676	0.198796	5.30575	0.01393
UCHL5_HUMAN	96	110	VLLNCTHQDVHLGET	14	1678.82	UCH37C88A_DEUBAD_K6/48 Ub3	120	1684.52	0.105895	4.6576	0.155029	5.29562	0.004591
UCHL5_HUMAN	96	110	VLLNCTHQDVHLGET	14	1678.82	UCH37C88A_DEUBAD_Ub	0	1679.86	0.113226	0	0	5.31136	0.039706
UCHL5_HUMAN	96	110	VLLNCTHQDVHLGET	14	1678.82	UCH37C88A_DEUBAD_Ub	1	1683.54	0.407591	3.67969	0.423026	5.28016	0.033782
UCHL5_HUMAN	96	110	VLLNCTHQDVHLGET	14	1678.82	UCH37C88A_DEUBAD_Ub	10	1683.38	0.138421	3.51493	0.178831	5.23446	0.001773
UCHL5_HUMAN	96	110	VLLNCTHQDVHLGET	14	1678.82	UCH37C88A_DEUBAD_Ub	30	1684.22	0.240383	4.35533	0.265715	5.27759	0.043085
UCHL5_HUMAN	96	110	VLLNCTHQDVHLGET	14	1678.82	UCH37C88A_DEUBAD_Ub	60	1683.79	0.198203	3.93254	0.228264	5.24629	0.005427
UCHL5_HUMAN	96	110	VLLNCTHQDVHLGET	14	1678.82	UCH37C88A_DEUBAD_Ub	120	1684	0.181607	4.1368	0.214013	5.24045	0.005092
UCHL5_HUMAN	96	111	VLLNCTHQDVHLGETL	15	1791.91	UCH37C88A_DEUBAD	0	1793.04	0.132706	0	0	5.9441	0.042537
UCHL5_HUMAN	96	111	VLLNCTHQDVHLGETL	15	1791.91	UCH37C88A_DEUBAD	1	1796.95	0.343261	3.90424	0.368021	5.95554	0.026936
UCHL5_HUMAN	96	111	VLLNCTHQDVHLGETL	15	1791.91	UCH37C88A_DEUBAD	10	1797.31	0.084945	4.26939	0.157564	5.95965	0.022311
UCHL5_HUMAN	96	111	VLLNCTHQDVHLGETL	15	1791.91	UCH37C88A_DEUBAD	30	1797.76	0.027132	4.71315	0.135451	5.97876	0.000728
UCHL5_HUMAN	96	111	VLLNCTHQDVHLGETL	15	1791.91	UCH37C88A_DEUBAD	60	1798.01	0.032222	4.96633	0.136562	5.96134	0.015366
UCHL5_HUMAN	96	111	VLLNCTHQDVHLGETL	15	1791.91	UCH37C88A_DEUBAD	120	1797.96	0.065305	4.9163	0.147904	5.94943	0.001511
UCHL5_HUMAN	96	111	VLLNCTHQDVHLGETL	15	1791.91	UCH37C88A_DEUBAD_K48 Ub2	0	1793.04	0.132706	0	0	5.9441	0.042537
UCHL5_HUMAN	96	111	VLLNCTHQDVHLGETL	15	1791.91	UCH37C88A_DEUBAD_K48 Ub2	1	1796.25	0.069569	3.20887	0.149836	5.96562	0.009016
UCHL5_HUMAN	96	111	VLLNCTHQDVHLGETL	15	1791.91	UCH37C88A_DEUBAD_K48 Ub2	10	1797.05	0.321525	4.00868	0.347835	5.9577	0.009758
UCHL5_HUMAN	96	111	VLLNCTHQDVHLGETL	15	1791.91	UCH37C88A_DEUBAD_K48 Ub2	30	1797.41	0.10577	4.36844	0.1697	5.95166	0.018417
UCHL5_HUMAN	96	111	VLLNCTHQDVHLGETL	15	1791.91	UCH37C88A_DEUBAD_K48 Ub2	60	1797.76	0.207478	4.71456	0.246289	5.95614	0.015319
UCHL5_HUMAN	96	111	VLLNCTHQDVHLGETL	15	1791.91	UCH37C88A_DEUBAD_K48 Ub2	120	1797.84	0.149471	4.79381	0.199881	5.94303	0.007383
UCHL5_HUMAN	96	111	VLLNCTHQDVHLGETL	15	1791.91	UCH37C88A_DEUBAD_K48 Ub3	0	1793.04	0.132706	0	0	5.9441	0.042537
UCHL5_HUMAN	96	111	VLLNCTHQDVHLGETL	15	1791.91	UCH37C88A_DEUBAD_K48 Ub3	1	1796.56	0.286921	3.51959	0.316125	5.96932	0.009604
UCHL5_HUMAN	96	111	VLLNCTHQDVHLGETL	15	1791.91	UCH37C88A_DEUBAD_K48 Ub3	10	1796.99	0.205712	3.94345	0.244803	5.9659	0.012892
UCHL5_HUMAN	96	111	VLLNCTHQDVHLGETL	15	1791.91	UCH37C88A_DEUBAD_K48 Ub3	30	1797.33	0.212928	4.28927	0.250897	5.96844	0.014342
UCHL5_HUMAN	96	111	VLLNCTHQDVHLGETL	15	1791.91	UCH37C88A_DEUBAD_K48 Ub3	60	1797.7	0.12881	4.66058	0.18494	5.96426	0.013398
UCHL5_HUMAN	96	111	VLLNCTHQDVHLGETL	15	1791.91	UCH37C88A_DEUBAD_K48 Ub3	120	1797.88	0.101161	4.84211	0.166867	5.95727	0.015998
UCHL5_HUMAN	96	111	VLLNCTHQDVHLGETL	15	1791.91	UCH37C88A_DEUBAD_K6/48 Ub3	0	1793.04	0.132706	0	0	5.9441	0.042537
UCHL5_HUMAN	96	111	VLLNCTHQDVHLGETL	15	1791.91	UCH37C88A_DEUBAD_K6/48 Ub3	1	1796.51	0.115858	3.47074	0.176165	5.97298	0.004922
UCHL5_HUMAN	96	111	VLLNCTHQDVHLGETL	15	1791.91	UCH37C88A_DEUBAD_K6/48 Ub3	10	1797.1	0.127275	4.0623	0.183874	5.95938	0.008322
UCHL5_HUMAN	96	111	VLLNCTHQDVHLGETL	15	1791.91	UCH37C88A_DEUBAD_K6/48 Ub3	30	1797.58	0.136827	4.53866	0.190611	5.95537	0.009085
UCHL5_HUMAN	96	111	VLLNCTHQDVHLGETL	15	1791.91	UCH37C88A_DEUBAD_K6/48 Ub3	60	1797.9	0.044259	4.85565	0.139892	5.97304	0.006937
UCHL5_HUMAN	96	111	VLLNCTHQDVHLGETL	15	1791.91	UCH37C88A_DEUBAD_K6/48 Ub3	120	1798.13	0.134756	5.09213	0.189129	5.9541	0.00765
UCHL5_HUMAN	96	111	VLLNCTHQDVHLGETL	15	1791.91	UCH37C88A_DEUBAD_Ub	0	1793.04	0.132706	0	0	5.9441	0.042537
UCHL5_HUMAN	96	111	VLLNCTHQDVHLGETL	15	1791.91	UCH37C88A_DEUBAD_Ub	1	1796.09	0.015824	3.04818	0.133646	5.90347	0.004409
UCHL5_HUMAN	96	111	VLLNCTHQDVHLGETL	15	1791.91	UCH37C88A_DEUBAD_Ub	10	1796.62	0.099122	3.57294	0.165639	5.89973	0.00555
UCHL5_HUMAN	96	111	VLLNCTHQDVHLGETL	15	1791.91	UCH37C88A_DEUBAD_Ub	30	1797.31	0.07069	4.27182	0.15036	5.89172	0.00142
UCHL5_HUMAN	96	111	VLLNCTHQDVHLGETL	15	1791.91	UCH37C88A_DEUBAD_Ub	60	1797.34	0.120476	4.29809	0.179236	5.89785	0.004707
UCHL5_HUMAN	96	111	VLLNCTHQDVHLGETL	15	1791.91	UCH37C88A_DEUBAD_Ub	120	1797.4	0.147986	4.35797	0.198773	5.89646	0.003448
UCHL5_HUMAN	96	113	VLLNCTHQDVHLGETLSE	17	2007.98	UCH37C88A_DEUBAD	0	2008.9	0.009353	0	0	7.45704	0.025689
UCHL5_HUMAN	96	113	VLLNCTHQDVHLGETLSE	17	2007.98	UCH37C88A_DEUBAD	1	2014.66	0.1094	5.75868	0.109799	6.60671	0.0296
UCHL5_HUMAN	96	113	VLLNCTHQDVHLGETLSE	17	2007.98	UCH37C88A_DEUBAD	10	2014.77	0.069264	5.8697	0.069892	6.60714	0.025905
UCHL5_HUMAN	96	113	VLLNCTHQDVHLGETLSE	17	2007.98	UCH37C88A_DEUBAD	30	2014.93	0.033392	6.02463	0.034677	6.60159	0.022345
UCHL5_HUMAN	96	113	VLLNCTHQDVHLGETLSE	17	2007.98	UCH37C88A_DEUBAD	60	2014.99	0.048859	6.08483	0.049747	6.61015	0.019792
UCHL5_HUMAN	96	113	VLLNCTHQDVHLGETLSE	17	2007.98	UCH37C88A_DEUBAD	120	2015.18	0.035589	6.28362	0.036797	6.59642	0.001053
UCHL5_HUMAN	96	113	VLLNCTHQDVHLGETLSE	17	2007.98	UCH37C88A_DEUBAD_K48 Ub2	0	2008.9	0.009353	0	0	7.45704	0.025689
UCHL5_HUMAN	96	113	VLLNCTHQDVHLGETLSE	17	2007.98	UCH37C88A_DEUBAD_K48 Ub2	1	2014.68	0.077743	5.77901	0.078304	6.598	0.00041
UCHL5_HUMAN	96	113	VLLNCTHQDVHLGETLSE	17	2007.98	UCH37C88A_DEUBAD_K48 Ub2	10	2014.62	0.058909	5.7146	0.059647	6.59692	0.017862
UCHL5_HUMAN	96	113	VLLNCTHQDVHLGETLSE	17	2007.98	UCH37C88A_DEUBAD_K48 Ub2	30	2014.67	0.026036	5.77244	0.027665	6.59995	0.021448
UCHL5_HUMAN	96	113	VLLNCTHQDVHLGETLSE	17	2007.98	UCH37C88A_DEUBAD_K48 Ub2	60	2014.84	0.318237	5.93808	0.318374	6.62283	0.02507
UCHL5_HUMAN	96	113	VLLNCTHQDVHLGETLSE	17	2007.98	UCH37C88A_DEUBAD_K48 Ub2	120	2014.7	0.144616	5.80124	0.144918	6.58346	0.000396
UCHL5_HUMAN	96	113	VLLNCTHQDVHLGETLSE	17	2007.98	UCH37C88A_DEUBAD_K48 Ub3	0	2008.9	0.009353	0	0	7.45704	0.025689
UCHL5_HUMAN	96	113	VLLNCTHQDVHLGETLSE	17	2007.98	UCH37C88A_DEUBAD_K48 Ub3	1	2014.48	0.125993	5.57708	0.12634	6.58717	0.022862
UCHL5_HUMAN	96	113	VLLNCTHQDVHLGETLSE	17	2007.98	UCH37C88A_DEUBAD_K48 Ub3	10	2014.57	0.067688	5.66847	0.068331	6.60798	0.023051
UCHL5_HUMAN	96	113	VLLNCTHQDVHLGETLSE	17	2007.98	UCH37C88A_DEUBAD_K48 Ub3	30	2014.76	0.13167	5.86184	0.132002	6.61415	0.019372
UCHL5_HUMAN	96	113	VLLNCTHQDVHLGETLSE	17	2007.98	UCH37C88A_DEUBAD_K48 Ub3	60	2014.88	0.156864	5.98066	0.157143	6.6139	0.01781
UCHL5_HUMAN	96	113	VLLNCTHQDVHLGETLSE	17	2007.98	UCH37C88A_DEUBAD_K48 Ub3	120	2014.74	0.055637	5.84028	0.056417	6.613	0.025082
UCHL5_HUMAN	96	113	VLLNCTHQDVHLGETLSE	17	2007.98	UCH37C88A_DEUBAD_K6/48 Ub3	0	2008.9	0.009353	0	0	7.45704	0.025689
UCHL5_HUMAN	96	113	VLLNCTHQDVHLGETLSE	17	2007.98	UCH37C88A_DEUBAD_K6/48 Ub3	1	2014.72	0.191275	5.81559	0.191503	6.61494	0.006049
UCHL5_HUMAN	96	113	VLLNCTHQDVHLGETLSE	17	2007.98	UCH37C88A_DEUBAD_K6/48 Ub3	10	2014.64	0.174251	5.74216	0.174502	6.60507	0.010431
UCHL5_HUMAN	96	113	VLLNCTHQDVHLGETLSE	17	2007.98	UCH37C88A_DEUBAD_K6/48 Ub3	30	2014.77	0.155894	5.86983	0.156174	6.60815	0.009191
UCHL5_HUMAN	96	113	VLLNCTHQDVHLGETLSE	17	2007.98	UCH37C88A_DEUBAD_K6/48 Ub3	60	2014.79	0.170628	5.88761	0.170884	6.60171	0.013186
UCHL5_HUMAN	96	113	VLLNCTHQDVHLGETLSE	17	2007.98	UCH37C88A_DEUBAD_K6/48 Ub3	120	2014.93	0.081929	6.02754	0.082461	6.59	0.013072
UCHL5_HUMAN	96	113	VLLNCTHQDVHLGETLSE	17	2007.98	UCH37C88A_DEUBAD_Ub	0	2008.9	0.009353	0	0	7.45704	0.025689
UCHL5_HUMAN	96	113	VLLNCTHQDVHLGETLSE	17	2007.98	UCH37C88A_DEUBAD_Ub	1	2014.52	0	5.62245	0.009353	6.51079	0
UCHL5_HUMAN	96	113	VLLNCTHQDVHLGETLSE	17	2007.98	UCH37C88A_DEUBAD_Ub	10	2014.56	0.134468	5.65477	0.134793	6.56891	0.162978
UCHL5_HUMAN	96	113	VLLNCTHQDVHLGETLSE	17	2007.98	UCH37C88A_DEUBAD_Ub	30	2014.65	0.042435	5.74936	0.043454	6.54903	0.05698
UCHL5_HUMAN	96	113	VLLNCTHQDVHLGETLSE	17	2007.98	UCH37C88A_DEUBAD_Ub	60	2014.7	0.101106	5.79819	0.101538	6.54394	0.047458
UCHL5_HUMAN	96	113	VLLNCTHQDVHLGETLSE	17	2007.98	UCH37C88A_DEUBAD_Ub	120	2014.65	0.057698	5.75149	0.058451	6.50417	0.004071
UCHL5_HUMAN	97	107	LLNCTHQDVHL	10	1292.64	UCH37C88A_DEUBAD	0	1293.25	0.027999	0	0	5.56498	0.048404
UCHL5_HUMAN	97	107	LLNCTHQDVHL	10	1292.64	UCH37C88A_DEUBAD	1	1295.5	0.297933	2.25546	0.299246	5.56716	0.022031
UCHL5_HUMAN	97	107	LLNCTHQDVHL	10	1292.64	UCH37C88A_DEUBAD	10	1295.41	0.04763	2.16296	0.05525	5.56691	0.01463
UCHL5_HUMAN	97	107	LLNCTHQDVHL	10	1292.64	UCH37C88A_DEUBAD	30	1295.78	0.089685	2.52878	0.093954	5.55516	0.019393
UCHL5_HUMAN	97	107	LLNCTHQDVHL	10	1292.64	UCH37C88A_DEUBAD	60	1295.95	0.003095	2.70522	0.02817	5.56937	0.008634
UCHL5_HUMAN	97	107	LLNCTHQDVHL	10	1292.64	UCH37C88A_DEUBAD	120	1295.98	0	2.73011	0.027999	5.55817	0
UCHL5_HUMAN	97	107	LLNCTHQDVHL	10	1292.64	UCH37C88A_DEUBAD_K48 Ub2	0	1293.25	0.027999	0	0	5.56498	0.048404
UCHL5_HUMAN	97	107	LLNCTHQDVHL	10	1292.64	UCH37C88A_DEUBAD_K48 Ub2	1	1295.25	0.083791	2.00185	0.088346	5.56712	0.003764
UCHL5_HUMAN	97	107	LLNCTHQDVHL	10	1292.64	UCH37C88A_DEUBAD_K48 Ub2	10	1295.62	0.135023	2.36875	0.137896	5.55833	0.010174
UCHL5_HUMAN	97	107	LLNCTHQDVHL	10	1292.64	UCH37C88A_DEUBAD_K48 Ub2	30	1295.86	0.041799	2.6089	0.05031	5.54341	0.022135
UCHL5_HUMAN	97	107	LLNCTHQDVHL	10	1292.64	UCH37C88A_DEUBAD_K48 Ub2	60	1295.86	0.074102	2.61187	0.079215	5.54785	0.007043
UCHL5_HUMAN	97	107	LLNCTHQDVHL	10	1292.64	UCH37C88A_DEUBAD_K48 Ub2	120	1295.96	0.05369	2.71499	0.060552	5.54356	0.007221
UCHL5_HUMAN	97	107	LLNCTHQDVHL	10	1292.64	UCH37C88A_DEUBAD_K48 Ub3	0	1293.25	0.027999	0	0	5.56498	0.048404
UCHL5_HUMAN	97	107	LLNCTHQDVHL	10	1292.64	UCH37C88A_DEUBAD_K48 Ub3	1	1295.38	0.162485	2.13621	0.16488	5.56866	0.005131
UCHL5_HUMAN	97	107	LLNCTHQDVHL	10	1292.64	UCH37C88A_DEUBAD_K48 Ub3	10	1295.58	0.108007	2.33506	0.111578	5.57205	0.00874
UCHL5_HUMAN	97	107	LLNCTHQDVHL	10	1292.64	UCH37C88A_DEUBAD_K48 Ub3	30	1295.82	0.138119	2.57738	0.140928	5.57459	0.008382
UCHL5_HUMAN	97	107	LLNCTHQDVHL	10	1292.64	UCH37C88A_DEUBAD_K48 Ub3	60	1295.79	0.076308	2.54381	0.081282	5.57107	0.00273
UCHL5_HUMAN	97	107	LLNCTHQDVHL	10	1292.64	UCH37C88A_DEUBAD_K48 Ub3	120	1295.91	0.129336	2.66406	0.132332	5.56453	0.012573
UCHL5_HUMAN	97	107	LLNCTHQDVHL	10	1292.64	UCH37C88A_DEUBAD_K6/48 Ub3	0	1293.25	0.027999	0	0	5.56498	0.048404
UCHL5_HUMAN	97	107	LLNCTHQDVHL	10	1292.64	UCH37C88A_DEUBAD_K6/48 Ub3	1	1295.2	0.00201	1.9506	0.028071	5.57979	0.001263
UCHL5_HUMAN	97	107	LLNCTHQDVHL	10	1292.64	UCH37C88A_DEUBAD_K6/48 Ub3	10	1295.6	0.038109	2.35258	0.047289	5.56339	0.008152
UCHL5_HUMAN	97	107	LLNCTHQDVHL	10	1292.64	UCH37C88A_DEUBAD_K6/48 Ub3	30	1295.86	0.083863	2.60922	0.088413	5.56209	0.00681
UCHL5_HUMAN	97	107	LLNCTHQDVHL	10	1292.64	UCH37C88A_DEUBAD_K6/48 Ub3	60	1296.06	0.135483	2.80984	0.138346	5.56771	0.010061
UCHL5_HUMAN	97	107	LLNCTHQDVHL	10	1292.64	UCH37C88A_DEUBAD_K6/48 Ub3	120	1296.11	0.104219	2.86048	0.107914	5.56665	0.006398
UCHL5_HUMAN	97	107	LLNCTHQDVHL	10	1292.64	UCH37C88A_DEUBAD_Ub	0	1293.25	0.027999	0	0	5.56498	0.048404
UCHL5_HUMAN	97	107	LLNCTHQDVHL	10	1292.64	UCH37C88A_DEUBAD_Ub	1	1295.31	0.129523	2.06223	0.132515	5.50168	0.006424
UCHL5_HUMAN	97	107	LLNCTHQDVHL	10	1292.64	UCH37C88A_DEUBAD_Ub	10	1295.6	0.137959	2.35718	0.140772	5.54326	0.046902
UCHL5_HUMAN	97	107	LLNCTHQDVHL	10	1292.64	UCH37C88A_DEUBAD_Ub	30	1295.82	0.061503	2.57267	0.067576	5.54865	0.046234
UCHL5_HUMAN	97	107	LLNCTHQDVHL	10	1292.64	UCH37C88A_DEUBAD_Ub	60	1296.01	0.213401	2.76105	0.21523	5.54461	0.042416
UCHL5_HUMAN	97	107	LLNCTHQDVHL	10	1292.64	UCH37C88A_DEUBAD_Ub	120	1295.87	0	2.62553	0.027999	5.49448	0
UCHL5_HUMAN	98	107	LNCTHQDVHL	9	1179.56	UCH37C88A_DEUBAD	0	1180.45	0.065971	0	0	4.74112	0.035749
UCHL5_HUMAN	98	107	LNCTHQDVHL	9	1179.56	UCH37C88A_DEUBAD	1	1182.55	0.135312	2.10469	0.150538	4.74287	0.022141
UCHL5_HUMAN	98	107	LNCTHQDVHL	9	1179.56	UCH37C88A_DEUBAD	10	1182.52	0.055601	2.06853	0.086277	4.74047	0.021378
UCHL5_HUMAN	98	107	LNCTHQDVHL	9	1179.56	UCH37C88A_DEUBAD	30	1182.67	0.092329	2.22721	0.113476	4.73771	0.014502
UCHL5_HUMAN	98	107	LNCTHQDVHL	9	1179.56	UCH37C88A_DEUBAD	60	1182.82	0.051388	2.36909	0.083624	4.74394	0.01374
UCHL5_HUMAN	98	107	LNCTHQDVHL	9	1179.56	UCH37C88A_DEUBAD	120	1182.87	0.061902	2.42476	0.090465	4.73447	0.004424
UCHL5_HUMAN	98	107	LNCTHQDVHL	9	1179.56	UCH37C88A_DEUBAD_K48 Ub2	0	1180.45	0.065971	0	0	4.74112	0.035749
UCHL5_HUMAN	98	107	LNCTHQDVHL	9	1179.56	UCH37C88A_DEUBAD_K48 Ub2	1	1182.42	0.042421	1.97609	0.078433	4.73489	0.013875
UCHL5_HUMAN	98	107	LNCTHQDVHL	9	1179.56	UCH37C88A_DEUBAD_K48 Ub2	10	1182.71	0.130841	2.2647	0.146532	4.72664	0.018576
UCHL5_HUMAN	98	107	LNCTHQDVHL	9	1179.56	UCH37C88A_DEUBAD_K48 Ub2	30	1182.86	0.085812	2.41653	0.10824	4.72449	0.028719
UCHL5_HUMAN	98	107	LNCTHQDVHL	9	1179.56	UCH37C88A_DEUBAD_K48 Ub2	60	1182.99	0.147249	2.5441	0.161352	4.72858	0.02191
UCHL5_HUMAN	98	107	LNCTHQDVHL	9	1179.56	UCH37C88A_DEUBAD_K48 Ub2	120	1183	0.106117	2.55174	0.124952	4.71157	0.015549
UCHL5_HUMAN	98	107	LNCTHQDVHL	9	1179.56	UCH37C88A_DEUBAD_K48 Ub3	0	1180.45	0.065971	0	0	4.74112	0.035749
UCHL5_HUMAN	98	107	LNCTHQDVHL	9	1179.56	UCH37C88A_DEUBAD_K48 Ub3	1	1182.49	0.109503	2.04059	0.12784	4.7294	0.018351
UCHL5_HUMAN	98	107	LNCTHQDVHL	9	1179.56	UCH37C88A_DEUBAD_K48 Ub3	10	1182.65	0.087043	2.20557	0.109218	4.73437	0.011446
UCHL5_HUMAN	98	107	LNCTHQDVHL	9	1179.56	UCH37C88A_DEUBAD_K48 Ub3	30	1182.83	0.107728	2.38762	0.126323	4.73549	0.011286
UCHL5_HUMAN	98	107	LNCTHQDVHL	9	1179.56	UCH37C88A_DEUBAD_K48 Ub3	60	1182.96	0.09376	2.51484	0.114643	4.73256	0.009672
UCHL5_HUMAN	98	107	LNCTHQDVHL	9	1179.56	UCH37C88A_DEUBAD_K48 Ub3	120	1183.04	0.064315	2.59455	0.092134	4.72513	0.005653
UCHL5_HUMAN	98	107	LNCTHQDVHL	9	1179.56	UCH37C88A_DEUBAD_K6/48 Ub3	0	1180.45	0.065971	0	0	4.74112	0.035749
UCHL5_HUMAN	98	107	LNCTHQDVHL	9	1179.56	UCH37C88A_DEUBAD_K6/48 Ub3	1	1182.46	0.031925	2.01302	0.07329	4.73969	0.011101
UCHL5_HUMAN	98	107	LNCTHQDVHL	9	1179.56	UCH37C88A_DEUBAD_K6/48 Ub3	10	1182.7	0.074225	2.25377	0.099305	4.72469	0.018546
UCHL5_HUMAN	98	107	LNCTHQDVHL	9	1179.56	UCH37C88A_DEUBAD_K6/48 Ub3	30	1182.88	0.078279	2.43784	0.102371	4.72625	0.013773
UCHL5_HUMAN	98	107	LNCTHQDVHL	9	1179.56	UCH37C88A_DEUBAD_K6/48 Ub3	60	1183.04	0.097242	2.59641	0.117509	4.73814	0.0169
UCHL5_HUMAN	98	107	LNCTHQDVHL	9	1179.56	UCH37C88A_DEUBAD_K6/48 Ub3	120	1183.13	0.080502	2.68032	0.10408	4.72493	0.006065
UCHL5_HUMAN	98	107	LNCTHQDVHL	9	1179.56	UCH37C88A_DEUBAD_Ub	0	1180.45	0.065971	0	0	4.74112	0.035749
UCHL5_HUMAN	98	107	LNCTHQDVHL	9	1179.56	UCH37C88A_DEUBAD_Ub	1	1182.55	0.049304	2.10085	0.082359	4.6391	0.034238
UCHL5_HUMAN	98	107	LNCTHQDVHL	9	1179.56	UCH37C88A_DEUBAD_Ub	10	1182.66	0.060651	2.20946	0.089614	4.63134	0.029044
UCHL5_HUMAN	98	107	LNCTHQDVHL	9	1179.56	UCH37C88A_DEUBAD_Ub	30	1182.84	0.118915	2.38955	0.135989	4.63455	0.025407
UCHL5_HUMAN	98	107	LNCTHQDVHL	9	1179.56	UCH37C88A_DEUBAD_Ub	60	1182.82	0.090223	2.37778	0.111769	4.63408	0.033106
UCHL5_HUMAN	98	107	LNCTHQDVHL	9	1179.56	UCH37C88A_DEUBAD_Ub	120	1182.92	0.028986	2.47392	0.072058	4.64905	0.007095
UCHL5_HUMAN	98	110	LNCTHQDVHLGET	12	1466.67	UCH37C88A_DEUBAD	0	1467.64	0.149747	0	0	4.49799	0.029524
UCHL5_HUMAN	98	110	LNCTHQDVHLGET	12	1466.67	UCH37C88A_DEUBAD	1	1471.34	0.188334	3.69314	0.240611	4.49096	0.016501
UCHL5_HUMAN	98	110	LNCTHQDVHLGET	12	1466.67	UCH37C88A_DEUBAD	10	1471.36	0.075564	3.71625	0.167732	4.48927	0.022234
UCHL5_HUMAN	98	110	LNCTHQDVHLGET	12	1466.67	UCH37C88A_DEUBAD	30	1471.54	0.088913	3.89065	0.174154	4.48979	0.015806
UCHL5_HUMAN	98	110	LNCTHQDVHLGET	12	1466.67	UCH37C88A_DEUBAD	60	1471.66	0.055976	4.01828	0.159867	4.49648	0.010359
UCHL5_HUMAN	98	110	LNCTHQDVHLGET	12	1466.67	UCH37C88A_DEUBAD	120	1471.73	0.080664	4.08165	0.17009	4.48875	0.001627
UCHL5_HUMAN	98	110	LNCTHQDVHLGET	12	1466.67	UCH37C88A_DEUBAD_K48 Ub2	0	1467.64	0.149747	0	0	4.49799	0.029524
UCHL5_HUMAN	98	110	LNCTHQDVHLGET	12	1466.67	UCH37C88A_DEUBAD_K48 Ub2	1	1471.2	0.081112	3.55782	0.170304	4.48412	0.017918
UCHL5_HUMAN	98	110	LNCTHQDVHLGET	12	1466.67	UCH37C88A_DEUBAD_K48 Ub2	10	1471.56	0.188433	3.91733	0.240689	4.47839	0.018251
UCHL5_HUMAN	98	110	LNCTHQDVHLGET	12	1466.67	UCH37C88A_DEUBAD_K48 Ub2	30	1471.72	0.118202	4.07739	0.190777	4.48316	0.024752
UCHL5_HUMAN	98	110	LNCTHQDVHLGET	12	1466.67	UCH37C88A_DEUBAD_K48 Ub2	60	1471.84	0.184576	4.19393	0.237682	4.47748	0.019448
UCHL5_HUMAN	98	110	LNCTHQDVHLGET	12	1466.67	UCH37C88A_DEUBAD_K48 Ub2	120	1471.81	0.183666	4.16299	0.236976	4.46833	0.014761
UCHL5_HUMAN	98	110	LNCTHQDVHLGET	12	1466.67	UCH37C88A_DEUBAD_K48 Ub3	0	1467.64	0.149747	0	0	4.49799	0.029524
UCHL5_HUMAN	98	110	LNCTHQDVHLGET	12	1466.67	UCH37C88A_DEUBAD_K48 Ub3	1	1471.24	0.185049	3.59158	0.238049	4.47901	0.017029
UCHL5_HUMAN	98	110	LNCTHQDVHLGET	12	1466.67	UCH37C88A_DEUBAD_K48 Ub3	10	1471.45	0.146642	3.80888	0.20959	4.48632	0.010385
UCHL5_HUMAN	98	110	LNCTHQDVHLGET	12	1466.67	UCH37C88A_DEUBAD_K48 Ub3	30	1471.65	0.159438	4.00454	0.218734	4.48984	0.010148
UCHL5_HUMAN	98	110	LNCTHQDVHLGET	12	1466.67	UCH37C88A_DEUBAD_K48 Ub3	60	1471.77	0.129473	4.13012	0.197958	4.48893	0.007325
UCHL5_HUMAN	98	110	LNCTHQDVHLGET	12	1466.67	UCH37C88A_DEUBAD_K48 Ub3	120	1471.86	0.132927	4.2112	0.200234	4.47673	0.006744
UCHL5_HUMAN	98	110	LNCTHQDVHLGET	12	1466.67	UCH37C88A_DEUBAD_K6/48 Ub3	0	1467.64	0.149747	0	0	4.49799	0.029524
UCHL5_HUMAN	98	110	LNCTHQDVHLGET	12	1466.67	UCH37C88A_DEUBAD_K6/48 Ub3	1	1471.28	0.101926	3.63499	0.181144	4.4898	0.00934
UCHL5_HUMAN	98	110	LNCTHQDVHLGET	12	1466.67	UCH37C88A_DEUBAD_K6/48 Ub3	10	1471.54	0.122676	3.89641	0.193581	4.47584	0.015609
UCHL5_HUMAN	98	110	LNCTHQDVHLGET	12	1466.67	UCH37C88A_DEUBAD_K6/48 Ub3	30	1471.74	0.125395	4.09174	0.195315	4.4801	0.009709
UCHL5_HUMAN	98	110	LNCTHQDVHLGET	12	1466.67	UCH37C88A_DEUBAD_K6/48 Ub3	60	1471.89	0.133543	4.24902	0.200644	4.48843	0.01313
UCHL5_HUMAN	98	110	LNCTHQDVHLGET	12	1466.67	UCH37C88A_DEUBAD_K6/48 Ub3	120	1471.96	0.110284	4.31114	0.185975	4.47326	0.002945
UCHL5_HUMAN	98	110	LNCTHQDVHLGET	12	1466.67	UCH37C88A_DEUBAD_Ub	0	1467.64	0.149747	0	0	4.49799	0.029524
UCHL5_HUMAN	98	110	LNCTHQDVHLGET	12	1466.67	UCH37C88A_DEUBAD_Ub	1	1471.19	0.234119	3.54242	0.277914	4.46017	0.019096
UCHL5_HUMAN	98	110	LNCTHQDVHLGET	12	1466.67	UCH37C88A_DEUBAD_Ub	10	1471.37	0.272478	3.7219	0.310915	4.45211	0.025433
UCHL5_HUMAN	98	110	LNCTHQDVHLGET	12	1466.67	UCH37C88A_DEUBAD_Ub	30	1471.66	0.26454	4.01478	0.303982	4.45751	0.032098
UCHL5_HUMAN	98	110	LNCTHQDVHLGET	12	1466.67	UCH37C88A_DEUBAD_Ub	60	1471.66	0.292672	4.0161	0.328756	4.46148	0.026222
UCHL5_HUMAN	98	110	LNCTHQDVHLGET	12	1466.67	UCH37C88A_DEUBAD_Ub	120	1471.47	0.069674	3.82196	0.165162	4.44516	0.007007
UCHL5_HUMAN	98	111	LNCTHQDVHLGETL	13	1579.75	UCH37C88A_DEUBAD	0	1580.96	0.385928	0	0	5.34545	0.048691
UCHL5_HUMAN	98	111	LNCTHQDVHLGETL	13	1579.75	UCH37C88A_DEUBAD	1	1584.54	0.20418	3.58545	0.436612	5.34053	0.024266
UCHL5_HUMAN	98	111	LNCTHQDVHLGETL	13	1579.75	UCH37C88A_DEUBAD	10	1584.93	0.086938	3.97432	0.395599	5.33828	0.018083
UCHL5_HUMAN	98	111	LNCTHQDVHLGETL	13	1579.75	UCH37C88A_DEUBAD	30	1585.3	0.066053	4.34578	0.39154	5.337	0.011366
UCHL5_HUMAN	98	111	LNCTHQDVHLGETL	13	1579.75	UCH37C88A_DEUBAD	60	1585.46	0.051424	4.50107	0.389339	5.34297	0.008555
UCHL5_HUMAN	98	111	LNCTHQDVHLGETL	13	1579.75	UCH37C88A_DEUBAD	120	1585.53	0.07733	4.5702	0.393599	5.33147	0.000594
UCHL5_HUMAN	98	111	LNCTHQDVHLGETL	13	1579.75	UCH37C88A_DEUBAD_K48 Ub2	0	1580.96	0.385928	0	0	5.34545	0.048691
UCHL5_HUMAN	98	111	LNCTHQDVHLGETL	13	1579.75	UCH37C88A_DEUBAD_K48 Ub2	1	1584.11	0.057469	3.15584	0.390184	5.33101	0.008115
UCHL5_HUMAN	98	111	LNCTHQDVHLGETL	13	1579.75	UCH37C88A_DEUBAD_K48 Ub2	10	1584.73	0.245504	3.77444	0.457398	5.31799	0.016183
UCHL5_HUMAN	98	111	LNCTHQDVHLGETL	13	1579.75	UCH37C88A_DEUBAD_K48 Ub2	30	1585.03	0.107737	4.07318	0.400684	5.31995	0.01949
UCHL5_HUMAN	98	111	LNCTHQDVHLGETL	13	1579.75	UCH37C88A_DEUBAD_K48 Ub2	60	1585.29	0.15107	4.33814	0.414443	5.32039	0.018047
UCHL5_HUMAN	98	111	LNCTHQDVHLGETL	13	1579.75	UCH37C88A_DEUBAD_K48 Ub2	120	1585.44	0.159741	4.47943	0.417682	5.30655	0.020964
UCHL5_HUMAN	98	111	LNCTHQDVHLGETL	13	1579.75	UCH37C88A_DEUBAD_K48 Ub3	0	1580.96	0.385928	0	0	5.34545	0.048691
UCHL5_HUMAN	98	111	LNCTHQDVHLGETL	13	1579.75	UCH37C88A_DEUBAD_K48 Ub3	1	1584.29	0.192844	3.33532	0.431427	5.33178	0.015262
UCHL5_HUMAN	98	111	LNCTHQDVHLGETL	13	1579.75	UCH37C88A_DEUBAD_K48 Ub3	10	1584.64	0.181909	3.68813	0.426652	5.3294	0.012726
UCHL5_HUMAN	98	111	LNCTHQDVHLGETL	13	1579.75	UCH37C88A_DEUBAD_K48 Ub3	30	1585	0.168997	4.04819	0.421308	5.32851	0.013949
UCHL5_HUMAN	98	111	LNCTHQDVHLGETL	13	1579.75	UCH37C88A_DEUBAD_K48 Ub3	60	1585.26	0.12028	4.30773	0.404237	5.32834	0.011251
UCHL5_HUMAN	98	111	LNCTHQDVHLGETL	13	1579.75	UCH37C88A_DEUBAD_K48 Ub3	120	1585.43	0.128318	4.47493	0.406702	5.31753	0.013366
UCHL5_HUMAN	98	111	LNCTHQDVHLGETL	13	1579.75	UCH37C88A_DEUBAD_K6/48 Ub3	0	1580.96	0.385928	0	0	5.34545	0.048691
UCHL5_HUMAN	98	111	LNCTHQDVHLGETL	13	1579.75	UCH37C88A_DEUBAD_K6/48 Ub3	1	1584.32	0.086992	3.35899	0.395611	5.34234	0.01101
UCHL5_HUMAN	98	111	LNCTHQDVHLGETL	13	1579.75	UCH37C88A_DEUBAD_K6/48 Ub3	10	1584.78	0.127785	3.81882	0.406534	5.3247	0.01593
UCHL5_HUMAN	98	111	LNCTHQDVHLGETL	13	1579.75	UCH37C88A_DEUBAD_K6/48 Ub3	30	1585.16	0.131488	4.2012	0.407713	5.32699	0.010253
UCHL5_HUMAN	98	111	LNCTHQDVHLGETL	13	1579.75	UCH37C88A_DEUBAD_K6/48 Ub3	60	1585.44	0.106234	4.47862	0.400283	5.3352	0.015526
UCHL5_HUMAN	98	111	LNCTHQDVHLGETL	13	1579.75	UCH37C88A_DEUBAD_K6/48 Ub3	120	1585.58	0.109178	4.62148	0.401074	5.32151	0.004401
UCHL5_HUMAN	98	111	LNCTHQDVHLGETL	13	1579.75	UCH37C88A_DEUBAD_Ub	0	1580.85	0.178123	0	0	5.34149	0.047965
UCHL5_HUMAN	98	111	LNCTHQDVHLGETL	13	1579.75	UCH37C88A_DEUBAD_Ub	1	1583.96	0.082116	3.11497	0.19614	5.26433	0.004421
UCHL5_HUMAN	98	111	LNCTHQDVHLGETL	13	1579.75	UCH37C88A_DEUBAD_Ub	10	1584.44	0.086314	3.59411	0.197934	5.25058	0.001224
UCHL5_HUMAN	98	111	LNCTHQDVHLGETL	13	1579.75	UCH37C88A_DEUBAD_Ub	30	1584.83	0.052085	3.97873	0.185582	5.25545	0.001009
UCHL5_HUMAN	98	111	LNCTHQDVHLGETL	13	1579.75	UCH37C88A_DEUBAD_Ub	60	1585.24	0.357406	4.39221	0.399334	5.2967	0.041709
UCHL5_HUMAN	98	111	LNCTHQDVHLGETL	13	1579.75	UCH37C88A_DEUBAD_Ub	120	1584.92	0.100225	4.06849	0.204384	5.25766	0.006262
UCHL5_HUMAN	98	113	LNCTHQDVHLGETLSE	15	1795.83	UCH37C88A_DEUBAD	0	1797.21	0.255492	0	0	5.17265	0.198122
UCHL5_HUMAN	98	113	LNCTHQDVHLGETLSE	15	1795.83	UCH37C88A_DEUBAD	1	1801.2	0.047493	3.98406	0.259869	5.10659	0.002793
UCHL5_HUMAN	98	113	LNCTHQDVHLGETLSE	15	1795.83	UCH37C88A_DEUBAD	10	1801.84	0.143499	4.63021	0.293033	5.12878	0.022539
UCHL5_HUMAN	98	113	LNCTHQDVHLGETLSE	15	1795.83	UCH37C88A_DEUBAD	30	1802.26	0.073666	5.04571	0.2659	5.12292	0.018844
UCHL5_HUMAN	98	113	LNCTHQDVHLGETLSE	15	1795.83	UCH37C88A_DEUBAD	60	1802.48	0.035808	5.27208	0.257989	5.12829	0.017486
UCHL5_HUMAN	98	113	LNCTHQDVHLGETLSE	15	1795.83	UCH37C88A_DEUBAD	120	1802.65	0.012419	5.4403	0.255794	5.1173	0.002681
UCHL5_HUMAN	98	113	LNCTHQDVHLGETLSE	15	1795.83	UCH37C88A_DEUBAD_K48 Ub2	0	1797.21	0.255492	0	0	5.17265	0.198122
UCHL5_HUMAN	98	113	LNCTHQDVHLGETLSE	15	1795.83	UCH37C88A_DEUBAD_K48 Ub2	1	1800.83	0.061977	3.61778	0.262902	5.12456	0.018719
UCHL5_HUMAN	98	113	LNCTHQDVHLGETLSE	15	1795.83	UCH37C88A_DEUBAD_K48 Ub2	10	1801.65	0.340162	4.44124	0.425425	5.1164	0.01616
UCHL5_HUMAN	98	113	LNCTHQDVHLGETLSE	15	1795.83	UCH37C88A_DEUBAD_K48 Ub2	30	1802.03	0.08417	4.81365	0.269	5.11764	0.023844
UCHL5_HUMAN	98	113	LNCTHQDVHLGETLSE	15	1795.83	UCH37C88A_DEUBAD_K48 Ub2	60	1802.49	0.194922	5.27819	0.321358	5.11739	0.020545
UCHL5_HUMAN	98	113	LNCTHQDVHLGETLSE	15	1795.83	UCH37C88A_DEUBAD_K48 Ub2	120	1802.63	0.178722	5.41914	0.311798	5.09912	0.012462
UCHL5_HUMAN	98	113	LNCTHQDVHLGETLSE	15	1795.83	UCH37C88A_DEUBAD_K48 Ub3	0	1797.21	0.255492	0	0	5.17265	0.198122
UCHL5_HUMAN	98	113	LNCTHQDVHLGETLSE	15	1795.83	UCH37C88A_DEUBAD_K48 Ub3	1	1800.94	0.045197	3.72639	0.259459	5.10607	0.002833
UCHL5_HUMAN	98	113	LNCTHQDVHLGETLSE	15	1795.83	UCH37C88A_DEUBAD_K48 Ub3	10	1801.54	0.220281	4.32751	0.337342	5.12612	0.011882
UCHL5_HUMAN	98	113	LNCTHQDVHLGETLSE	15	1795.83	UCH37C88A_DEUBAD_K48 Ub3	30	1802.09	0.232961	4.87571	0.345756	5.12415	0.014032
UCHL5_HUMAN	98	113	LNCTHQDVHLGETLSE	15	1795.83	UCH37C88A_DEUBAD_K48 Ub3	60	1802.45	0.120587	5.23532	0.28252	5.12525	0.013916
UCHL5_HUMAN	98	113	LNCTHQDVHLGETLSE	15	1795.83	UCH37C88A_DEUBAD_K48 Ub3	120	1802.76	0.095009	5.5476	0.272586	5.11317	0.010997
UCHL5_HUMAN	98	113	LNCTHQDVHLGETLSE	15	1795.83	UCH37C88A_DEUBAD_K6/48 Ub3	0	1797.21	0.255492	0	0	5.17265	0.198122
UCHL5_HUMAN	98	113	LNCTHQDVHLGETLSE	15	1795.83	UCH37C88A_DEUBAD_K6/48 Ub3	1	1801.12	0.026394	3.90292	0.256852	5.14241	0.003986
UCHL5_HUMAN	98	113	LNCTHQDVHLGETLSE	15	1795.83	UCH37C88A_DEUBAD_K6/48 Ub3	10	1801.8	0.142018	4.58611	0.29231	5.12777	0.015812
UCHL5_HUMAN	98	113	LNCTHQDVHLGETLSE	15	1795.83	UCH37C88A_DEUBAD_K6/48 Ub3	30	1802.29	0.036378	5.08101	0.258069	5.12531	0.013998
UCHL5_HUMAN	98	113	LNCTHQDVHLGETLSE	15	1795.83	UCH37C88A_DEUBAD_K6/48 Ub3	60	1802.66	0.023315	5.44302	0.256554	5.12839	0.012187
UCHL5_HUMAN	98	113	LNCTHQDVHLGETLSE	15	1795.83	UCH37C88A_DEUBAD_K6/48 Ub3	120	1803.1	0.021052	5.88739	0.256358	5.11659	0.003647
UCHL5_HUMAN	98	113	LNCTHQDVHLGETLSE	15	1795.83	UCH37C88A_DEUBAD_Ub	0	1797	0.08645	0	0	5.16175	0.189487
UCHL5_HUMAN	98	113	LNCTHQDVHLGETLSE	15	1795.83	UCH37C88A_DEUBAD_Ub	1	1800.59	0.064632	3.58962	0.107939	5.06962	0.00456
UCHL5_HUMAN	98	113	LNCTHQDVHLGETLSE	15	1795.83	UCH37C88A_DEUBAD_Ub	10	1801.14	0.090216	4.13825	0.12495	5.06051	0.001341
UCHL5_HUMAN	98	113	LNCTHQDVHLGETLSE	15	1795.83	UCH37C88A_DEUBAD_Ub	30	1801.99	0.116872	4.99043	0.145371	5.06079	0.000175
UCHL5_HUMAN	98	113	LNCTHQDVHLGETLSE	15	1795.83	UCH37C88A_DEUBAD_Ub	60	1801.99	0.135818	4.99175	0.160997	5.06644	0.001382
UCHL5_HUMAN	98	113	LNCTHQDVHLGETLSE	15	1795.83	UCH37C88A_DEUBAD_Ub	120	1802.37	0	5.36475	0.08645	5.06833	0
UCHL5_HUMAN	99	107	NCTHQDVHL	8	1066.47	UCH37C88A_DEUBAD	0	1067.02	0.039792	0	0	4.73574	0.036483
UCHL5_HUMAN	99	107	NCTHQDVHL	8	1066.47	UCH37C88A_DEUBAD	1	1069	0	1.97398	0.039792	4.72802	0
UCHL5_HUMAN	99	107	NCTHQDVHL	8	1066.47	UCH37C88A_DEUBAD	10	1069.13	0.007663	2.10602	0.040523	4.7417	0.0198
UCHL5_HUMAN	99	107	NCTHQDVHL	8	1066.47	UCH37C88A_DEUBAD	30	1069.27	0.010732	2.24524	0.041213	4.74177	0.012961
UCHL5_HUMAN	99	107	NCTHQDVHL	8	1066.47	UCH37C88A_DEUBAD	60	1069.41	0.010623	2.38669	0.041185	4.74635	0.010466
UCHL5_HUMAN	99	107	NCTHQDVHL	8	1066.47	UCH37C88A_DEUBAD	120	1069.38	0	2.35771	0.039792	4.73423	0
UCHL5_HUMAN	99	107	NCTHQDVHL	8	1066.47	UCH37C88A_DEUBAD_K48 Ub2	0	1067.02	0.039792	0	0	4.73574	0.036483
UCHL5_HUMAN	99	107	NCTHQDVHL	8	1066.47	UCH37C88A_DEUBAD_K48 Ub2	1	1068.95	0.071788	1.92216	0.082079	4.73013	0.01315
UCHL5_HUMAN	99	107	NCTHQDVHL	8	1066.47	UCH37C88A_DEUBAD_K48 Ub2	10	1069.26	0.14006	2.23154	0.145603	4.7269	0.019854
UCHL5_HUMAN	99	107	NCTHQDVHL	8	1066.47	UCH37C88A_DEUBAD_K48 Ub2	30	1069.42	0.131181	2.39603	0.137083	4.71972	0.027214
UCHL5_HUMAN	99	107	NCTHQDVHL	8	1066.47	UCH37C88A_DEUBAD_K48 Ub2	60	1069.51	0.148761	2.48221	0.153991	4.72753	0.01914
UCHL5_HUMAN	99	107	NCTHQDVHL	8	1066.47	UCH37C88A_DEUBAD_K48 Ub2	120	1069.57	0.14069	2.55062	0.146209	4.70913	0.016618
UCHL5_HUMAN	99	107	NCTHQDVHL	8	1066.47	UCH37C88A_DEUBAD_K48 Ub3	0	1067.02	0.039792	0	0	4.73574	0.036483
UCHL5_HUMAN	99	107	NCTHQDVHL	8	1066.47	UCH37C88A_DEUBAD_K48 Ub3	1	1069.05	0.121807	2.03045	0.128142	4.72624	0.01866
UCHL5_HUMAN	99	107	NCTHQDVHL	8	1066.47	UCH37C88A_DEUBAD_K48 Ub3	10	1069.21	0.103582	2.18562	0.110962	4.73613	0.009743
UCHL5_HUMAN	99	107	NCTHQDVHL	8	1066.47	UCH37C88A_DEUBAD_K48 Ub3	30	1069.41	0.123781	2.38962	0.13002	4.73822	0.010531
UCHL5_HUMAN	99	107	NCTHQDVHL	8	1066.47	UCH37C88A_DEUBAD_K48 Ub3	60	1069.53	0.102999	2.50324	0.110418	4.73668	0.008447
UCHL5_HUMAN	99	107	NCTHQDVHL	8	1066.47	UCH37C88A_DEUBAD_K48 Ub3	120	1069.62	0.072134	2.59139	0.082381	4.72936	0.006411
UCHL5_HUMAN	99	107	NCTHQDVHL	8	1066.47	UCH37C88A_DEUBAD_K6/48 Ub3	0	1067.02	0.039792	0	0	4.73574	0.036483
UCHL5_HUMAN	99	107	NCTHQDVHL	8	1066.47	UCH37C88A_DEUBAD_K6/48 Ub3	1	1069.05	0.097898	2.02674	0.105676	4.73831	0.010819
UCHL5_HUMAN	99	107	NCTHQDVHL	8	1066.47	UCH37C88A_DEUBAD_K6/48 Ub3	10	1069.27	0.051868	2.24187	0.065373	4.72532	0.018946
UCHL5_HUMAN	99	107	NCTHQDVHL	8	1066.47	UCH37C88A_DEUBAD_K6/48 Ub3	30	1069.47	0.102821	2.44754	0.110252	4.72782	0.012367
UCHL5_HUMAN	99	107	NCTHQDVHL	8	1066.47	UCH37C88A_DEUBAD_K6/48 Ub3	60	1069.6	0.074639	2.58032	0.084583	4.7399	0.015513
UCHL5_HUMAN	99	107	NCTHQDVHL	8	1066.47	UCH37C88A_DEUBAD_K6/48 Ub3	120	1069.72	0.041784	2.70036	0.0577	4.72775	0.003503
UCHL5_HUMAN	99	107	NCTHQDVHL	8	1066.47	UCH37C88A_DEUBAD_Ub	0	1067.02	0.039792	0	0	4.73574	0.036483
UCHL5_HUMAN	99	107	NCTHQDVHL	8	1066.47	UCH37C88A_DEUBAD_Ub	1	1069.09	0.011339	2.0623	0.041375	4.65215	0.006979
UCHL5_HUMAN	99	107	NCTHQDVHL	8	1066.47	UCH37C88A_DEUBAD_Ub	10	1069.18	0.054732	2.15793	0.067668	4.64249	0.003334
UCHL5_HUMAN	99	107	NCTHQDVHL	8	1066.47	UCH37C88A_DEUBAD_Ub	30	1069.38	0.041085	2.35786	0.057196	4.64394	0.000627
UCHL5_HUMAN	99	107	NCTHQDVHL	8	1066.47	UCH37C88A_DEUBAD_Ub	60	1069.39	0.084627	2.36568	0.093515	4.64651	0.002806
UCHL5_HUMAN	99	107	NCTHQDVHL	8	1066.47	UCH37C88A_DEUBAD_Ub	120	1069.46	0.014534	2.43141	0.042363	4.65087	0.004299
UCHL5_HUMAN	99	110	NCTHQDVHLGET	11	1353.59	UCH37C88A_DEUBAD	0	1354.16	0.112387	0	0	4.01466	0.040797
UCHL5_HUMAN	99	110	NCTHQDVHLGET	11	1353.59	UCH37C88A_DEUBAD	1	1358.05	0.207303	3.89859	0.235808	4.02334	0.023706
UCHL5_HUMAN	99	110	NCTHQDVHLGET	11	1353.59	UCH37C88A_DEUBAD	10	1358.12	0.088275	3.96822	0.14291	4.0194	0.023492
UCHL5_HUMAN	99	110	NCTHQDVHLGET	11	1353.59	UCH37C88A_DEUBAD	30	1358.12	0.010403	3.96594	0.112867	4.0184	0.009441
UCHL5_HUMAN	99	110	NCTHQDVHLGET	11	1353.59	UCH37C88A_DEUBAD	60	1358.35	0.071572	4.19635	0.133241	4.01904	0.010243
UCHL5_HUMAN	99	110	NCTHQDVHLGET	11	1353.59	UCH37C88A_DEUBAD	120	1358.16	0.102993	4.00074	0.152441	4.01119	0.00188
UCHL5_HUMAN	99	110	NCTHQDVHLGET	11	1353.59	UCH37C88A_DEUBAD_K48 Ub2	0	1354.16	0.112387	0	0	4.01466	0.040797
UCHL5_HUMAN	99	110	NCTHQDVHLGET	11	1353.59	UCH37C88A_DEUBAD_K48 Ub2	1	1357.81	0.122107	3.65176	0.165955	4.0106	0.021291
UCHL5_HUMAN	99	110	NCTHQDVHLGET	11	1353.59	UCH37C88A_DEUBAD_K48 Ub2	10	1358.19	0.290914	4.03113	0.311868	4.00395	0.020078
UCHL5_HUMAN	99	110	NCTHQDVHLGET	11	1353.59	UCH37C88A_DEUBAD_K48 Ub2	30	1358.24	0.268877	4.08621	0.29142	3.99403	0.029533
UCHL5_HUMAN	99	110	NCTHQDVHLGET	11	1353.59	UCH37C88A_DEUBAD_K48 Ub2	60	1358.34	0.202081	4.18146	0.23123	4.00463	0.02139
UCHL5_HUMAN	99	110	NCTHQDVHLGET	11	1353.59	UCH37C88A_DEUBAD_K48 Ub2	120	1358.35	0.185902	4.19831	0.217233	3.98719	0.019163
UCHL5_HUMAN	99	110	NCTHQDVHLGET	11	1353.59	UCH37C88A_DEUBAD_K48 Ub3	0	1354.16	0.112387	0	0	4.01466	0.040797
UCHL5_HUMAN	99	110	NCTHQDVHLGET	11	1353.59	UCH37C88A_DEUBAD_K48 Ub3	1	1357.91	0.281794	3.75274	0.303378	4.00668	0.02557
UCHL5_HUMAN	99	110	NCTHQDVHLGET	11	1353.59	UCH37C88A_DEUBAD_K48 Ub3	10	1358.12	0.277398	3.96813	0.2993	4.00826	0.01575
UCHL5_HUMAN	99	110	NCTHQDVHLGET	11	1353.59	UCH37C88A_DEUBAD_K48 Ub3	30	1358.1	0.190569	3.9444	0.22124	4.0062	0.014876
UCHL5_HUMAN	99	110	NCTHQDVHLGET	11	1353.59	UCH37C88A_DEUBAD_K48 Ub3	60	1358.34	0.169918	4.18906	0.203722	4.00774	0.012297
UCHL5_HUMAN	99	110	NCTHQDVHLGET	11	1353.59	UCH37C88A_DEUBAD_K48 Ub3	120	1358.41	0.164126	4.25772	0.198917	4.00008	0.006244
UCHL5_HUMAN	99	110	NCTHQDVHLGET	11	1353.59	UCH37C88A_DEUBAD_K6/48 Ub3	0	1354.16	0.112387	0	0	4.01466	0.040797
UCHL5_HUMAN	99	110	NCTHQDVHLGET	11	1353.59	UCH37C88A_DEUBAD_K6/48 Ub3	1	1357.82	0.223562	3.66149	0.250222	4.01881	0.013514
UCHL5_HUMAN	99	110	NCTHQDVHLGET	11	1353.59	UCH37C88A_DEUBAD_K6/48 Ub3	10	1358.07	0.125246	3.91799	0.168277	4.00427	0.021492
UCHL5_HUMAN	99	110	NCTHQDVHLGET	11	1353.59	UCH37C88A_DEUBAD_K6/48 Ub3	30	1358.32	0.181996	4.16076	0.2139	4.00109	0.016671
UCHL5_HUMAN	99	110	NCTHQDVHLGET	11	1353.59	UCH37C88A_DEUBAD_K6/48 Ub3	60	1358.41	0.148074	4.25744	0.185895	4.01399	0.017108
UCHL5_HUMAN	99	110	NCTHQDVHLGET	11	1353.59	UCH37C88A_DEUBAD_K6/48 Ub3	120	1358.39	0.131496	4.23257	0.172979	3.99681	0.005278
UCHL5_HUMAN	99	110	NCTHQDVHLGET	11	1353.59	UCH37C88A_DEUBAD_Ub	0	1354.16	0.112387	0	0	4.01466	0.040797
UCHL5_HUMAN	99	110	NCTHQDVHLGET	11	1353.59	UCH37C88A_DEUBAD_Ub	1	1357.8	0.123131	3.6421	0.166709	3.95559	0.02283
UCHL5_HUMAN	99	110	NCTHQDVHLGET	11	1353.59	UCH37C88A_DEUBAD_Ub	10	1357.81	0.07884	3.65112	0.137282	3.94071	0.002009
UCHL5_HUMAN	99	110	NCTHQDVHLGET	11	1353.59	UCH37C88A_DEUBAD_Ub	30	1357.98	0.099321	3.82139	0.149985	3.94291	0.003171
UCHL5_HUMAN	99	110	NCTHQDVHLGET	11	1353.59	UCH37C88A_DEUBAD_Ub	60	1358.01	0.14178	3.85223	0.180921	3.95371	0.022913
UCHL5_HUMAN	99	110	NCTHQDVHLGET	11	1353.59	UCH37C88A_DEUBAD_Ub	120	1358.16	0.088515	4.00619	0.143059	3.94174	0.005169
UCHL5_HUMAN	99	111	NCTHQDVHLGETL	12	1466.67	UCH37C88A_DEUBAD	0	1467.52	0.093299	0	0	5.08991	0.031244
UCHL5_HUMAN	99	111	NCTHQDVHLGETL	12	1466.67	UCH37C88A_DEUBAD	1	1471.16	0.208201	3.64283	0.22815	5.08623	0.023559
UCHL5_HUMAN	99	111	NCTHQDVHLGETL	12	1466.67	UCH37C88A_DEUBAD	10	1471.53	0.03761	4.01379	0.100594	5.08718	0.018538
UCHL5_HUMAN	99	111	NCTHQDVHLGETL	12	1466.67	UCH37C88A_DEUBAD	30	1471.91	0.03593	4.39288	0.099978	5.08151	0.014954
UCHL5_HUMAN	99	111	NCTHQDVHLGETL	12	1466.67	UCH37C88A_DEUBAD	60	1472.01	0.02006	4.48848	0.095431	5.08659	0.017559
UCHL5_HUMAN	99	111	NCTHQDVHLGETL	12	1466.67	UCH37C88A_DEUBAD	120	1472.13	0.053479	4.60993	0.107539	5.07796	0.000541
UCHL5_HUMAN	99	111	NCTHQDVHLGETL	12	1466.67	UCH37C88A_DEUBAD_K48 Ub2	0	1467.52	0.093299	0	0	5.08991	0.031244
UCHL5_HUMAN	99	111	NCTHQDVHLGETL	12	1466.67	UCH37C88A_DEUBAD_K48 Ub2	1	1470.71	0.067824	3.1942	0.115346	5.08336	0.016941
UCHL5_HUMAN	99	111	NCTHQDVHLGETL	12	1466.67	UCH37C88A_DEUBAD_K48 Ub2	10	1471.28	0.237035	3.76206	0.254735	5.07794	0.015578
UCHL5_HUMAN	99	111	NCTHQDVHLGETL	12	1466.67	UCH37C88A_DEUBAD_K48 Ub2	30	1471.62	0.148697	4.09822	0.175543	5.07626	0.021983
UCHL5_HUMAN	99	111	NCTHQDVHLGETL	12	1466.67	UCH37C88A_DEUBAD_K48 Ub2	60	1471.85	0.195266	4.32875	0.21641	5.07591	0.019001
UCHL5_HUMAN	99	111	NCTHQDVHLGETL	12	1466.67	UCH37C88A_DEUBAD_K48 Ub2	120	1472.16	0.060482	4.64457	0.111188	5.07144	0.00154
UCHL5_HUMAN	99	111	NCTHQDVHLGETL	12	1466.67	UCH37C88A_DEUBAD_K48 Ub3	0	1467.52	0.093299	0	0	5.08991	0.031244
UCHL5_HUMAN	99	111	NCTHQDVHLGETL	12	1466.67	UCH37C88A_DEUBAD_K48 Ub3	1	1470.82	0.206808	3.30391	0.226879	5.08167	0.018396
UCHL5_HUMAN	99	111	NCTHQDVHLGETL	12	1466.67	UCH37C88A_DEUBAD_K48 Ub3	10	1471.13	0.149256	3.60961	0.176017	5.08841	0.011749
UCHL5_HUMAN	99	111	NCTHQDVHLGETL	12	1466.67	UCH37C88A_DEUBAD_K48 Ub3	30	1471.68	0.171151	4.16456	0.194929	5.08533	0.015582
UCHL5_HUMAN	99	111	NCTHQDVHLGETL	12	1466.67	UCH37C88A_DEUBAD_K48 Ub3	60	1471.84	0.125627	4.32088	0.156483	5.08012	0.010957
UCHL5_HUMAN	99	111	NCTHQDVHLGETL	12	1466.67	UCH37C88A_DEUBAD_K48 Ub3	120	1471.95	0.128694	4.42588	0.158955	5.07527	0.008051
UCHL5_HUMAN	99	111	NCTHQDVHLGETL	12	1466.67	UCH37C88A_DEUBAD_K6/48 Ub3	0	1467.52	0.093299	0	0	5.08991	0.031244
UCHL5_HUMAN	99	111	NCTHQDVHLGETL	12	1466.67	UCH37C88A_DEUBAD_K6/48 Ub3	1	1470.83	0.114867	3.3076	0.147984	5.08701	0.012502
UCHL5_HUMAN	99	111	NCTHQDVHLGETL	12	1466.67	UCH37C88A_DEUBAD_K6/48 Ub3	10	1471.36	0.173864	3.84533	0.197315	5.07453	0.015819
UCHL5_HUMAN	99	111	NCTHQDVHLGETL	12	1466.67	UCH37C88A_DEUBAD_K6/48 Ub3	30	1471.72	0.127109	4.19878	0.157675	5.07545	0.014137
UCHL5_HUMAN	99	111	NCTHQDVHLGETL	12	1466.67	UCH37C88A_DEUBAD_K6/48 Ub3	60	1471.99	0.092454	4.47079	0.131349	5.08593	0.012583
UCHL5_HUMAN	99	111	NCTHQDVHLGETL	12	1466.67	UCH37C88A_DEUBAD_K6/48 Ub3	120	1472.06	0.152836	4.54216	0.179063	5.07382	0.003618
UCHL5_HUMAN	99	111	NCTHQDVHLGETL	12	1466.67	UCH37C88A_DEUBAD_Ub	0	1467.52	0.093299	0	0	5.08991	0.031244
UCHL5_HUMAN	99	111	NCTHQDVHLGETL	12	1466.67	UCH37C88A_DEUBAD_Ub	1	1470.59	0.065565	3.07372	0.114032	4.99741	0.006646
UCHL5_HUMAN	99	111	NCTHQDVHLGETL	12	1466.67	UCH37C88A_DEUBAD_Ub	10	1471	0.067944	3.47698	0.115417	4.98676	0.003731
UCHL5_HUMAN	99	111	NCTHQDVHLGETL	12	1466.67	UCH37C88A_DEUBAD_Ub	30	1471.41	0.074246	3.89336	0.119235	4.98649	0.003306
UCHL5_HUMAN	99	111	NCTHQDVHLGETL	12	1466.67	UCH37C88A_DEUBAD_Ub	60	1471.43	0.054559	3.91281	0.10808	4.99177	0.003748
UCHL5_HUMAN	99	111	NCTHQDVHLGETL	12	1466.67	UCH37C88A_DEUBAD_Ub	120	1471.59	0.049412	4.07214	0.105575	4.99221	0.005827
UCHL5_HUMAN	99	113	NCTHQDVHLGETLSE	14	1682.74	UCH37C88A_DEUBAD	0	1683.77	0.103556	0	0	4.84235	0.036789
UCHL5_HUMAN	99	113	NCTHQDVHLGETLSE	14	1682.74	UCH37C88A_DEUBAD	1	1687.99	0.345933	4.22321	0.3611	4.83954	0.022007
UCHL5_HUMAN	99	113	NCTHQDVHLGETLSE	14	1682.74	UCH37C88A_DEUBAD	10	1688.36	0.095781	4.59331	0.14106	4.83887	0.019286
UCHL5_HUMAN	99	113	NCTHQDVHLGETLSE	14	1682.74	UCH37C88A_DEUBAD	30	1688.74	0.06038	4.97661	0.119873	4.8327	0.015775
UCHL5_HUMAN	99	113	NCTHQDVHLGETLSE	14	1682.74	UCH37C88A_DEUBAD	60	1688.97	0.046184	5.20142	0.113388	4.83945	0.014815
UCHL5_HUMAN	99	113	NCTHQDVHLGETLSE	14	1682.74	UCH37C88A_DEUBAD	120	1689.18	0.012538	5.41549	0.104312	4.83098	0.000943
UCHL5_HUMAN	99	113	NCTHQDVHLGETLSE	14	1682.74	UCH37C88A_DEUBAD_K48 Ub2	0	1683.77	0.103556	0	0	4.84235	0.036789
UCHL5_HUMAN	99	113	NCTHQDVHLGETLSE	14	1682.74	UCH37C88A_DEUBAD_K48 Ub2	1	1687.39	0.064065	3.62688	0.121771	4.8294	0.021013
UCHL5_HUMAN	99	113	NCTHQDVHLGETLSE	14	1682.74	UCH37C88A_DEUBAD_K48 Ub2	10	1688.19	0.337581	4.41765	0.353107	4.82426	0.020815
UCHL5_HUMAN	99	113	NCTHQDVHLGETLSE	14	1682.74	UCH37C88A_DEUBAD_K48 Ub2	30	1688.56	0.071004	4.78794	0.12556	4.8224	0.031009
UCHL5_HUMAN	99	113	NCTHQDVHLGETLSE	14	1682.74	UCH37C88A_DEUBAD_K48 Ub2	60	1689.02	0.228448	5.25204	0.250823	4.82389	0.022217
UCHL5_HUMAN	99	113	NCTHQDVHLGETLSE	14	1682.74	UCH37C88A_DEUBAD_K48 Ub2	120	1689.2	0.183089	5.42856	0.210346	4.81006	0.019775
UCHL5_HUMAN	99	113	NCTHQDVHLGETLSE	14	1682.74	UCH37C88A_DEUBAD_K48 Ub3	0	1683.77	0.103556	0	0	4.84235	0.036789
UCHL5_HUMAN	99	113	NCTHQDVHLGETLSE	14	1682.74	UCH37C88A_DEUBAD_K48 Ub3	1	1687.64	0.276781	3.87111	0.295519	4.82596	0.023516
UCHL5_HUMAN	99	113	NCTHQDVHLGETLSE	14	1682.74	UCH37C88A_DEUBAD_K48 Ub3	10	1688.11	0.205051	4.34177	0.229717	4.83026	0.014881
UCHL5_HUMAN	99	113	NCTHQDVHLGETLSE	14	1682.74	UCH37C88A_DEUBAD_K48 Ub3	30	1688.59	0.237776	4.81859	0.259348	4.82941	0.013593
UCHL5_HUMAN	99	113	NCTHQDVHLGETLSE	14	1682.74	UCH37C88A_DEUBAD_K48 Ub3	60	1688.97	0.098644	5.19929	0.143019	4.82734	0.012692
UCHL5_HUMAN	99	113	NCTHQDVHLGETLSE	14	1682.74	UCH37C88A_DEUBAD_K48 Ub3	120	1689.26	0.085991	5.49145	0.134604	4.81778	0.005836
UCHL5_HUMAN	99	113	NCTHQDVHLGETLSE	14	1682.74	UCH37C88A_DEUBAD_K6/48 Ub3	0	1683.77	0.103556	0	0	4.84235	0.036789
UCHL5_HUMAN	99	113	NCTHQDVHLGETLSE	14	1682.74	UCH37C88A_DEUBAD_K6/48 Ub3	1	1687.59	0.134444	3.8171	0.169703	4.8388	0.013346
UCHL5_HUMAN	99	113	NCTHQDVHLGETLSE	14	1682.74	UCH37C88A_DEUBAD_K6/48 Ub3	10	1688.26	0.147728	4.49493	0.180409	4.82022	0.021276
UCHL5_HUMAN	99	113	NCTHQDVHLGETLSE	14	1682.74	UCH37C88A_DEUBAD_K6/48 Ub3	30	1688.76	0.085593	4.99428	0.13435	4.82264	0.018417
UCHL5_HUMAN	99	113	NCTHQDVHLGETLSE	14	1682.74	UCH37C88A_DEUBAD_K6/48 Ub3	60	1689.21	0.039064	5.44062	0.110679	4.83209	0.016259
UCHL5_HUMAN	99	113	NCTHQDVHLGETLSE	14	1682.74	UCH37C88A_DEUBAD_K6/48 Ub3	120	1689.54	0.123619	5.77452	0.161262	4.81698	0.003495
UCHL5_HUMAN	99	113	NCTHQDVHLGETLSE	14	1682.74	UCH37C88A_DEUBAD_Ub	0	1683.77	0.103556	0	0	4.84235	0.036789
UCHL5_HUMAN	99	113	NCTHQDVHLGETLSE	14	1682.74	UCH37C88A_DEUBAD_Ub	1	1687.36	0.112729	3.58886	0.153074	4.78663	0.004928
UCHL5_HUMAN	99	113	NCTHQDVHLGETLSE	14	1682.74	UCH37C88A_DEUBAD_Ub	10	1687.87	0.170222	4.106	0.199247	4.7746	0.003565
UCHL5_HUMAN	99	113	NCTHQDVHLGETLSE	14	1682.74	UCH37C88A_DEUBAD_Ub	30	1688.66	0.172621	4.8888	0.2013	4.77384	0.000912
UCHL5_HUMAN	99	113	NCTHQDVHLGETLSE	14	1682.74	UCH37C88A_DEUBAD_Ub	60	1688.62	0.138661	4.85144	0.173062	4.7807	0.001457
UCHL5_HUMAN	99	113	NCTHQDVHLGETLSE	14	1682.74	UCH37C88A_DEUBAD_Ub	120	1688.84	0.085337	5.07285	0.134187	4.77903	0.002963
UCHL5_HUMAN	101	111	THQDVHLGETL	10	1249.62	UCH37C88A_DEUBAD	0	1250.16	0.061236	0	0	4.9582	0.034378
UCHL5_HUMAN	101	111	THQDVHLGETL	10	1249.62	UCH37C88A_DEUBAD	1	1253.29	0.279585	3.12888	0.286212	4.96655	0.021858
UCHL5_HUMAN	101	111	THQDVHLGETL	10	1249.62	UCH37C88A_DEUBAD	10	1253.39	0.108459	3.22999	0.124552	4.96962	0.020695
UCHL5_HUMAN	101	111	THQDVHLGETL	10	1249.62	UCH37C88A_DEUBAD	30	1253.87	0.147761	3.71497	0.159948	4.96334	0.014366
UCHL5_HUMAN	101	111	THQDVHLGETL	10	1249.62	UCH37C88A_DEUBAD	60	1254.06	0.061781	3.90761	0.086987	4.97011	0.013537
UCHL5_HUMAN	101	111	THQDVHLGETL	10	1249.62	UCH37C88A_DEUBAD	120	1254.05	0	3.89491	0.061236	4.96194	0
UCHL5_HUMAN	101	111	THQDVHLGETL	10	1249.62	UCH37C88A_DEUBAD_K48 Ub2	0	1250.16	0.061236	0	0	4.9582	0.034378
UCHL5_HUMAN	101	111	THQDVHLGETL	10	1249.62	UCH37C88A_DEUBAD_K48 Ub2	1	1252.89	0.271225	2.72979	0.278052	4.95277	0.019396
UCHL5_HUMAN	101	111	THQDVHLGETL	10	1249.62	UCH37C88A_DEUBAD_K48 Ub2	10	1253.59	0.114661	3.43296	0.129989	4.95056	0.016521
UCHL5_HUMAN	101	111	THQDVHLGETL	10	1249.62	UCH37C88A_DEUBAD_K48 Ub2	30	1253.87	0.142913	3.71346	0.15548	4.94277	0.027832
UCHL5_HUMAN	101	111	THQDVHLGETL	10	1249.62	UCH37C88A_DEUBAD_K48 Ub2	60	1253.93	0.260678	3.77278	0.267774	4.95139	0.016209
UCHL5_HUMAN	101	111	THQDVHLGETL	10	1249.62	UCH37C88A_DEUBAD_K48 Ub2	120	1254	0.121354	3.84007	0.135929	4.93961	0.015409
UCHL5_HUMAN	101	111	THQDVHLGETL	10	1249.62	UCH37C88A_DEUBAD_K48 Ub3	0	1250.16	0.061236	0	0	4.9582	0.034378
UCHL5_HUMAN	101	111	THQDVHLGETL	10	1249.62	UCH37C88A_DEUBAD_K48 Ub3	1	1252.69	0.301712	2.53002	0.307863	4.95991	0.018041
UCHL5_HUMAN	101	111	THQDVHLGETL	10	1249.62	UCH37C88A_DEUBAD_K48 Ub3	10	1253.3	0.232709	3.1395	0.240631	4.96009	0.012551
UCHL5_HUMAN	101	111	THQDVHLGETL	10	1249.62	UCH37C88A_DEUBAD_K48 Ub3	30	1253.7	0.18797	3.54048	0.197693	4.96159	0.012187
UCHL5_HUMAN	101	111	THQDVHLGETL	10	1249.62	UCH37C88A_DEUBAD_K48 Ub3	60	1254.01	0.127138	3.85206	0.141117	4.95892	0.009946
UCHL5_HUMAN	101	111	THQDVHLGETL	10	1249.62	UCH37C88A_DEUBAD_K48 Ub3	120	1254.18	0.186689	4.01811	0.196475	4.94927	0.01048
UCHL5_HUMAN	101	111	THQDVHLGETL	10	1249.62	UCH37C88A_DEUBAD_K6/48 Ub3	0	1250.16	0.061236	0	0	4.9582	0.034378
UCHL5_HUMAN	101	111	THQDVHLGETL	10	1249.62	UCH37C88A_DEUBAD_K6/48 Ub3	1	1252.78	0.092849	2.6202	0.111224	4.96591	0.009606
UCHL5_HUMAN	101	111	THQDVHLGETL	10	1249.62	UCH37C88A_DEUBAD_K6/48 Ub3	10	1253.4	0.166362	3.24031	0.177274	4.95262	0.016638
UCHL5_HUMAN	101	111	THQDVHLGETL	10	1249.62	UCH37C88A_DEUBAD_K6/48 Ub3	30	1253.71	0.140039	3.55286	0.152842	4.95098	0.013448
UCHL5_HUMAN	101	111	THQDVHLGETL	10	1249.62	UCH37C88A_DEUBAD_K6/48 Ub3	60	1254.32	0.046772	4.15852	0.077055	4.9608	0.014009
UCHL5_HUMAN	101	111	THQDVHLGETL	10	1249.62	UCH37C88A_DEUBAD_K6/48 Ub3	120	1254.39	0.042036	4.23569	0.074275	4.94976	0.002558
UCHL5_HUMAN	101	111	THQDVHLGETL	10	1249.62	UCH37C88A_DEUBAD_Ub	0	1250.16	0.061236	0	0	4.9582	0.034378
UCHL5_HUMAN	101	111	THQDVHLGETL	10	1249.62	UCH37C88A_DEUBAD_Ub	1	1252.89	0.082478	2.72841	0.102725	4.8617	0.006009
UCHL5_HUMAN	101	111	THQDVHLGETL	10	1249.62	UCH37C88A_DEUBAD_Ub	10	1253.34	0	3.18462	0.061236	4.84615	0
UCHL5_HUMAN	101	111	THQDVHLGETL	10	1249.62	UCH37C88A_DEUBAD_Ub	30	1253.54	0.006961	3.38345	0.06163	4.84833	2.65206e-05
UCHL5_HUMAN	101	111	THQDVHLGETL	10	1249.62	UCH37C88A_DEUBAD_Ub	60	1253.8	0.322495	3.63989	0.328257	4.91422	0.097482
UCHL5_HUMAN	101	111	THQDVHLGETL	10	1249.62	UCH37C88A_DEUBAD_Ub	120	1254.64	0.093561	4.48559	0.111819	4.94029	0.104505
UCHL5_HUMAN	101	113	THQDVHLGETLSE	12	1465.69	UCH37C88A_DEUBAD	0	1466.41	0.048161	0	0	4.72942	0.035286
UCHL5_HUMAN	101	113	THQDVHLGETLSE	12	1465.69	UCH37C88A_DEUBAD	1	1469.76	0.136294	3.34926	0.144553	4.72881	0.020497
UCHL5_HUMAN	101	113	THQDVHLGETLSE	12	1465.69	UCH37C88A_DEUBAD	10	1470.35	0.099636	3.94285	0.110665	4.73278	0.022546
UCHL5_HUMAN	101	113	THQDVHLGETLSE	12	1465.69	UCH37C88A_DEUBAD	30	1470.75	0.136574	4.33811	0.144817	4.72731	0.015172
UCHL5_HUMAN	101	113	THQDVHLGETLSE	12	1465.69	UCH37C88A_DEUBAD	60	1470.97	0.038093	4.55658	0.061405	4.73204	0.01241
UCHL5_HUMAN	101	113	THQDVHLGETLSE	12	1465.69	UCH37C88A_DEUBAD	120	1471.2	0.074901	4.78561	0.089048	4.72194	2.46853e-05
UCHL5_HUMAN	101	113	THQDVHLGETLSE	12	1465.69	UCH37C88A_DEUBAD_K48 Ub2	0	1466.41	0.048161	0	0	4.72942	0.035286
UCHL5_HUMAN	101	113	THQDVHLGETLSE	12	1465.69	UCH37C88A_DEUBAD_K48 Ub2	1	1469.43	0.051946	3.01649	0.070837	4.72741	0.017515
UCHL5_HUMAN	101	113	THQDVHLGETLSE	12	1465.69	UCH37C88A_DEUBAD_K48 Ub2	10	1470.03	0.05108	3.61765	0.070204	4.71721	0.023429
UCHL5_HUMAN	101	113	THQDVHLGETLSE	12	1465.69	UCH37C88A_DEUBAD_K48 Ub2	30	1470.61	0.018242	4.19794	0.0515	4.71661	0.029265
UCHL5_HUMAN	101	113	THQDVHLGETLSE	12	1465.69	UCH37C88A_DEUBAD_K48 Ub2	60	1471.08	0.215665	4.66416	0.220978	4.71801	0.020286
UCHL5_HUMAN	101	113	THQDVHLGETLSE	12	1465.69	UCH37C88A_DEUBAD_K48 Ub2	120	1471.21	0.143641	4.79641	0.1515	4.69954	0.015192
UCHL5_HUMAN	101	113	THQDVHLGETLSE	12	1465.69	UCH37C88A_DEUBAD_K48 Ub3	0	1466.41	0.048161	0	0	4.72942	0.035286
UCHL5_HUMAN	101	113	THQDVHLGETLSE	12	1465.69	UCH37C88A_DEUBAD_K48 Ub3	1	1469.75	0.205285	3.33671	0.210859	4.7169	0.018784
UCHL5_HUMAN	101	113	THQDVHLGETLSE	12	1465.69	UCH37C88A_DEUBAD_K48 Ub3	10	1470.08	0.085836	3.66504	0.098424	4.72695	0.011186
UCHL5_HUMAN	101	113	THQDVHLGETLSE	12	1465.69	UCH37C88A_DEUBAD_K48 Ub3	30	1470.72	0.239157	4.3043	0.243958	4.72999	0.014103
UCHL5_HUMAN	101	113	THQDVHLGETLSE	12	1465.69	UCH37C88A_DEUBAD_K48 Ub3	60	1471.03	0.110318	4.61927	0.120373	4.72242	0.007384
UCHL5_HUMAN	101	113	THQDVHLGETLSE	12	1465.69	UCH37C88A_DEUBAD_K48 Ub3	120	1471.38	0.062388	4.96739	0.078815	4.71291	0.009111
UCHL5_HUMAN	101	113	THQDVHLGETLSE	12	1465.69	UCH37C88A_DEUBAD_K6/48 Ub3	0	1466.41	0.048161	0	0	4.72942	0.035286
UCHL5_HUMAN	101	113	THQDVHLGETLSE	12	1465.69	UCH37C88A_DEUBAD_K6/48 Ub3	1	1469.66	0.090118	3.24525	0.10218	4.72774	0.014013
UCHL5_HUMAN	101	113	THQDVHLGETLSE	12	1465.69	UCH37C88A_DEUBAD_K6/48 Ub3	10	1470.33	0.094493	3.91393	0.106059	4.71225	0.017591
UCHL5_HUMAN	101	113	THQDVHLGETLSE	12	1465.69	UCH37C88A_DEUBAD_K6/48 Ub3	30	1470.81	0.072379	4.3992	0.086938	4.71682	0.014907
UCHL5_HUMAN	101	113	THQDVHLGETLSE	12	1465.69	UCH37C88A_DEUBAD_K6/48 Ub3	60	1471.24	0.120779	4.82475	0.130027	4.7271	0.013554
UCHL5_HUMAN	101	113	THQDVHLGETLSE	12	1465.69	UCH37C88A_DEUBAD_K6/48 Ub3	120	1471.6	0.155034	5.19254	0.162342	4.71136	0.00433
UCHL5_HUMAN	101	113	THQDVHLGETLSE	12	1465.69	UCH37C88A_DEUBAD_Ub	0	1466.41	0.048161	0	0	4.72942	0.035286
UCHL5_HUMAN	101	113	THQDVHLGETLSE	12	1465.69	UCH37C88A_DEUBAD_Ub	1	1469.45	0.064094	3.03932	0.080172	4.65515	0.009595
UCHL5_HUMAN	101	113	THQDVHLGETLSE	12	1465.69	UCH37C88A_DEUBAD_Ub	10	1469.98	0.172469	3.5641	0.179067	4.64506	0.006356
UCHL5_HUMAN	101	113	THQDVHLGETLSE	12	1465.69	UCH37C88A_DEUBAD_Ub	30	1470.75	0.153307	4.34024	0.160694	4.64493	0.004345
UCHL5_HUMAN	101	113	THQDVHLGETLSE	12	1465.69	UCH37C88A_DEUBAD_Ub	60	1470.8	0.162668	4.38794	0.169647	4.64753	0.003827
UCHL5_HUMAN	101	113	THQDVHLGETLSE	12	1465.69	UCH37C88A_DEUBAD_Ub	120	1471.07	0.076276	4.65817	0.090208	4.64611	0.00521
UCHL5_HUMAN	104	113	DVHLGETLSE	9	1099.53	UCH37C88A_DEUBAD	0	1100.07	0.02309	0	0	5.35585	0.043478
UCHL5_HUMAN	104	113	DVHLGETLSE	9	1099.53	UCH37C88A_DEUBAD	1	1103.08	0.003393	3.01343	0.023338	5.32441	0.000522
UCHL5_HUMAN	104	113	DVHLGETLSE	9	1099.53	UCH37C88A_DEUBAD	10	1103.76	0.065062	3.69362	0.069037	5.34739	0.019745
UCHL5_HUMAN	104	113	DVHLGETLSE	9	1099.53	UCH37C88A_DEUBAD	30	1104.16	0.013668	4.09336	0.026832	5.34196	0.013603
UCHL5_HUMAN	104	113	DVHLGETLSE	9	1099.53	UCH37C88A_DEUBAD	60	1104.38	0.021128	4.30933	0.031297	5.34527	0.011942
UCHL5_HUMAN	104	113	DVHLGETLSE	9	1099.53	UCH37C88A_DEUBAD	120	1104.47	0	4.40057	0.02309	5.33491	0
UCHL5_HUMAN	104	113	DVHLGETLSE	9	1099.53	UCH37C88A_DEUBAD_K48 Ub2	0	1100.07	0.02309	0	0	5.35585	0.043478
UCHL5_HUMAN	104	113	DVHLGETLSE	9	1099.53	UCH37C88A_DEUBAD_K48 Ub2	1	1102.96	0.035614	2.89635	0.042444	5.34109	0.008126
UCHL5_HUMAN	104	113	DVHLGETLSE	9	1099.53	UCH37C88A_DEUBAD_K48 Ub2	10	1103.67	0.243091	3.60621	0.244186	5.32882	0.013351
UCHL5_HUMAN	104	113	DVHLGETLSE	9	1099.53	UCH37C88A_DEUBAD_K48 Ub2	30	1103.98	0.046735	3.9176	0.052127	5.32658	0.019301
UCHL5_HUMAN	104	113	DVHLGETLSE	9	1099.53	UCH37C88A_DEUBAD_K48 Ub2	60	1104.32	0.136225	4.25627	0.138168	5.32979	0.015291
UCHL5_HUMAN	104	113	DVHLGETLSE	9	1099.53	UCH37C88A_DEUBAD_K48 Ub2	120	1104.54	0.058081	4.472	0.062502	5.32104	0.007904
UCHL5_HUMAN	104	113	DVHLGETLSE	9	1099.53	UCH37C88A_DEUBAD_K48 Ub3	0	1100.07	0.02309	0	0	5.35585	0.043478
UCHL5_HUMAN	104	113	DVHLGETLSE	9	1099.53	UCH37C88A_DEUBAD_K48 Ub3	1	1103.16	0.138022	3.09116	0.13994	5.34028	0.012746
UCHL5_HUMAN	104	113	DVHLGETLSE	9	1099.53	UCH37C88A_DEUBAD_K48 Ub3	10	1103.6	0.179597	3.53726	0.181075	5.34065	0.014309
UCHL5_HUMAN	104	113	DVHLGETLSE	9	1099.53	UCH37C88A_DEUBAD_K48 Ub3	30	1104.03	0.154517	3.96495	0.156233	5.34038	0.013365
UCHL5_HUMAN	104	113	DVHLGETLSE	9	1099.53	UCH37C88A_DEUBAD_K48 Ub3	60	1104.4	0.070569	4.33573	0.07425	5.33953	0.012273
UCHL5_HUMAN	104	113	DVHLGETLSE	9	1099.53	UCH37C88A_DEUBAD_K48 Ub3	120	1104.55	0.076705	4.48503	0.080105	5.33045	0.015477
UCHL5_HUMAN	104	113	DVHLGETLSE	9	1099.53	UCH37C88A_DEUBAD_K6/48 Ub3	0	1100.07	0.02309	0	0	5.35585	0.043478
UCHL5_HUMAN	104	113	DVHLGETLSE	9	1099.53	UCH37C88A_DEUBAD_K6/48 Ub3	1	1103.1	0.114584	3.03304	0.116887	5.35191	0.007814
UCHL5_HUMAN	104	113	DVHLGETLSE	9	1099.53	UCH37C88A_DEUBAD_K6/48 Ub3	10	1103.68	0.083479	3.61362	0.086613	5.33309	0.013137
UCHL5_HUMAN	104	113	DVHLGETLSE	9	1099.53	UCH37C88A_DEUBAD_K6/48 Ub3	30	1104.17	0.065419	4.10288	0.069374	5.33608	0.011272
UCHL5_HUMAN	104	113	DVHLGETLSE	9	1099.53	UCH37C88A_DEUBAD_K6/48 Ub3	60	1104.47	0.058577	4.39932	0.062963	5.33821	0.011272
UCHL5_HUMAN	104	113	DVHLGETLSE	9	1099.53	UCH37C88A_DEUBAD_K6/48 Ub3	120	1104.72	0.038681	4.65749	0.045048	5.33161	0.005332
UCHL5_HUMAN	104	113	DVHLGETLSE	9	1099.53	UCH37C88A_DEUBAD_Ub	0	1100.07	0.02309	0	0	5.35585	0.043478
UCHL5_HUMAN	104	113	DVHLGETLSE	9	1099.53	UCH37C88A_DEUBAD_Ub	1	1102.94	0.004436	2.87615	0.023512	5.2515	0.003514
UCHL5_HUMAN	104	113	DVHLGETLSE	9	1099.53	UCH37C88A_DEUBAD_Ub	10	1103.44	0.085648	3.37917	0.088706	5.24572	0.000857
UCHL5_HUMAN	104	113	DVHLGETLSE	9	1099.53	UCH37C88A_DEUBAD_Ub	30	1104.18	0.125431	4.11351	0.127538	5.24661	0.000518
UCHL5_HUMAN	104	113	DVHLGETLSE	9	1099.53	UCH37C88A_DEUBAD_Ub	60	1104.23	0.101157	4.16696	0.103759	5.25342	0.00339
UCHL5_HUMAN	104	113	DVHLGETLSE	9	1099.53	UCH37C88A_DEUBAD_Ub	120	1104.23	0.025765	4.16919	0.034597	5.24859	0.004528
UCHL5_HUMAN	114	120	FKEFSQS	6	872.415	UCH37C88A_DEUBAD	0	872.947	0.117342	0	0	4.64759	0.039494
UCHL5_HUMAN	114	120	FKEFSQS	6	872.415	UCH37C88A_DEUBAD	1	874.225	0.049259	1.27806	0.127262	4.62442	0.000716
UCHL5_HUMAN	114	120	FKEFSQS	6	872.415	UCH37C88A_DEUBAD	10	874.555	0.084125	1.60854	0.144382	4.65799	0.023179
UCHL5_HUMAN	114	120	FKEFSQS	6	872.415	UCH37C88A_DEUBAD	30	874.984	0.094222	2.03664	0.150489	4.64519	0.015178
UCHL5_HUMAN	114	120	FKEFSQS	6	872.415	UCH37C88A_DEUBAD	60	875.16	0.055591	2.21265	0.129844	4.64505	0.013677
UCHL5_HUMAN	114	120	FKEFSQS	6	872.415	UCH37C88A_DEUBAD	120	875.386	0.029366	2.43949	0.120961	4.64486	0.005502
UCHL5_HUMAN	114	120	FKEFSQS	6	872.415	UCH37C88A_DEUBAD_K48 Ub2	0	872.947	0.117342	0	0	4.64759	0.039494
UCHL5_HUMAN	114	120	FKEFSQS	6	872.415	UCH37C88A_DEUBAD_K48 Ub2	1	873.951	0.067834	1.00374	0.135538	4.63407	0.023293
UCHL5_HUMAN	114	120	FKEFSQS	6	872.415	UCH37C88A_DEUBAD_K48 Ub2	10	874.135	0.16834	1.18819	0.205201	4.62653	0.024435
UCHL5_HUMAN	114	120	FKEFSQS	6	872.415	UCH37C88A_DEUBAD_K48 Ub2	30	874.372	0.101832	1.42476	0.155367	4.62363	0.034926
UCHL5_HUMAN	114	120	FKEFSQS	6	872.415	UCH37C88A_DEUBAD_K48 Ub2	60	874.67	0.091412	1.72287	0.148746	4.6267	0.024001
UCHL5_HUMAN	114	120	FKEFSQS	6	872.415	UCH37C88A_DEUBAD_K48 Ub2	120	874.688	0.06694	1.74103	0.135093	4.61106	0.026826
UCHL5_HUMAN	114	120	FKEFSQS	6	872.415	UCH37C88A_DEUBAD_K48 Ub3	0	872.947	0.117342	0	0	4.64759	0.039494
UCHL5_HUMAN	114	120	FKEFSQS	6	872.415	UCH37C88A_DEUBAD_K48 Ub3	1	874.158	0.134819	1.21095	0.178733	4.62557	0.024102
UCHL5_HUMAN	114	120	FKEFSQS	6	872.415	UCH37C88A_DEUBAD_K48 Ub3	10	874.33	0.13137	1.38327	0.176145	4.62726	0.00465
UCHL5_HUMAN	114	120	FKEFSQS	6	872.415	UCH37C88A_DEUBAD_K48 Ub3	30	874.532	0.060625	1.58517	0.132078	4.62823	0.005799
UCHL5_HUMAN	114	120	FKEFSQS	6	872.415	UCH37C88A_DEUBAD_K48 Ub3	60	874.723	0.04508	1.77601	0.125703	4.62738	0.002608
UCHL5_HUMAN	114	120	FKEFSQS	6	872.415	UCH37C88A_DEUBAD_K48 Ub3	120	874.952	0.064459	2.00513	0.133881	4.62654	0.006074
UCHL5_HUMAN	114	120	FKEFSQS	6	872.415	UCH37C88A_DEUBAD_K6/48 Ub3	0	872.947	0.117342	0	0	4.64759	0.039494
UCHL5_HUMAN	114	120	FKEFSQS	6	872.415	UCH37C88A_DEUBAD_K6/48 Ub3	1	874.201	0.087134	1.25365	0.146155	4.6392	0.020295
UCHL5_HUMAN	114	120	FKEFSQS	6	872.415	UCH37C88A_DEUBAD_K6/48 Ub3	10	874.789	0.135373	1.84177	0.179151	4.62085	0.022583
UCHL5_HUMAN	114	120	FKEFSQS	6	872.415	UCH37C88A_DEUBAD_K6/48 Ub3	30	875.059	0.095325	2.11162	0.151182	4.62891	0.020559
UCHL5_HUMAN	114	120	FKEFSQS	6	872.415	UCH37C88A_DEUBAD_K6/48 Ub3	60	875.327	0.082115	2.38053	0.14322	4.63675	0.02111
UCHL5_HUMAN	114	120	FKEFSQS	6	872.415	UCH37C88A_DEUBAD_K6/48 Ub3	120	875.485	0.068422	2.53856	0.135833	4.61965	0.007773
UCHL5_HUMAN	114	120	FKEFSQS	6	872.415	UCH37C88A_DEUBAD_Ub	0	872.816	0.014734	0	0	4.63694	0.037404
UCHL5_HUMAN	114	120	FKEFSQS	6	872.415	UCH37C88A_DEUBAD_Ub	1	874.544	0.030201	1.72829	0.033603	4.52052	0.007951
UCHL5_HUMAN	114	120	FKEFSQS	6	872.415	UCH37C88A_DEUBAD_Ub	10	874.987	0.067179	2.17087	0.068775	4.50572	0.000299
UCHL5_HUMAN	114	120	FKEFSQS	6	872.415	UCH37C88A_DEUBAD_Ub	30	875.538	0.065481	2.72187	0.067118	4.50733	2.43797e-06
UCHL5_HUMAN	114	120	FKEFSQS	6	872.415	UCH37C88A_DEUBAD_Ub	60	875.622	0.095993	2.80632	0.097118	4.5129	0.002334
UCHL5_HUMAN	114	120	FKEFSQS	6	872.415	UCH37C88A_DEUBAD_Ub	120	875.788	0.052286	2.9719	0.054323	4.51167	0.008079
UCHL5_HUMAN	114	121	FKEFSQSF	7	1019.48	UCH37C88A_DEUBAD	0	1020.39	0.229436	0	0	6.23797	0.060204
UCHL5_HUMAN	114	121	FKEFSQSF	7	1019.48	UCH37C88A_DEUBAD	1	1021.73	0.140557	1.34531	0.269067	6.20343	0.001782
UCHL5_HUMAN	114	121	FKEFSQSF	7	1019.48	UCH37C88A_DEUBAD	10	1022.19	0.214794	1.80226	0.314288	6.23847	0.02917
UCHL5_HUMAN	114	121	FKEFSQSF	7	1019.48	UCH37C88A_DEUBAD	30	1022.66	0.102744	2.27034	0.25139	6.23287	0.021225
UCHL5_HUMAN	114	121	FKEFSQSF	7	1019.48	UCH37C88A_DEUBAD	60	1022.95	0.069396	2.56661	0.239701	6.23731	0.016955
UCHL5_HUMAN	114	121	FKEFSQSF	7	1019.48	UCH37C88A_DEUBAD	120	1023.27	0.022317	2.88554	0.230518	6.22865	0.000955
UCHL5_HUMAN	114	121	FKEFSQSF	7	1019.48	UCH37C88A_DEUBAD_K48 Ub2	0	1020.39	0.229436	0	0	6.23797	0.060204
UCHL5_HUMAN	114	121	FKEFSQSF	7	1019.48	UCH37C88A_DEUBAD_K48 Ub2	1	1021.26	0.083027	0.875475	0.243996	6.22208	0.023705
UCHL5_HUMAN	114	121	FKEFSQSF	7	1019.48	UCH37C88A_DEUBAD_K48 Ub2	10	1021.45	0.107557	1.06545	0.253395	6.21236	0.030469
UCHL5_HUMAN	114	121	FKEFSQSF	7	1019.48	UCH37C88A_DEUBAD_K48 Ub2	30	1021.8	0.16257	1.41202	0.281193	6.20919	0.039833
UCHL5_HUMAN	114	121	FKEFSQSF	7	1019.48	UCH37C88A_DEUBAD_K48 Ub2	60	1022.2	0.129358	1.80883	0.26339	6.2147	0.035453
UCHL5_HUMAN	114	121	FKEFSQSF	7	1019.48	UCH37C88A_DEUBAD_K48 Ub2	120	1022.11	0.086849	1.72118	0.245323	6.19583	0.030936
UCHL5_HUMAN	114	121	FKEFSQSF	7	1019.48	UCH37C88A_DEUBAD_K48 Ub3	0	1020.39	0.229436	0	0	6.23797	0.060204
UCHL5_HUMAN	114	121	FKEFSQSF	7	1019.48	UCH37C88A_DEUBAD_K48 Ub3	1	1021.49	0.085362	1.09982	0.244801	6.2203	0.028761
UCHL5_HUMAN	114	121	FKEFSQSF	7	1019.48	UCH37C88A_DEUBAD_K48 Ub3	10	1021.6	0.132173	1.21417	0.264783	6.21896	0.009091
UCHL5_HUMAN	114	121	FKEFSQSF	7	1019.48	UCH37C88A_DEUBAD_K48 Ub3	30	1021.81	0.200349	1.42209	0.304598	6.22243	0.004146
UCHL5_HUMAN	114	121	FKEFSQSF	7	1019.48	UCH37C88A_DEUBAD_K48 Ub3	60	1022.22	0.10258	1.83264	0.251323	6.2159	0.001049
UCHL5_HUMAN	114	121	FKEFSQSF	7	1019.48	UCH37C88A_DEUBAD_K48 Ub3	120	1022.49	0.079593	2.10243	0.242849	6.21668	0.012866
UCHL5_HUMAN	114	121	FKEFSQSF	7	1019.48	UCH37C88A_DEUBAD_K6/48 Ub3	0	1020.39	0.229436	0	0	6.23797	0.060204
UCHL5_HUMAN	114	121	FKEFSQSF	7	1019.48	UCH37C88A_DEUBAD_K6/48 Ub3	1	1021.66	0.114932	1.27358	0.256612	6.23962	0.020498
UCHL5_HUMAN	114	121	FKEFSQSF	7	1019.48	UCH37C88A_DEUBAD_K6/48 Ub3	10	1022.19	0.140186	1.8049	0.268873	6.21631	0.029083
UCHL5_HUMAN	114	121	FKEFSQSF	7	1019.48	UCH37C88A_DEUBAD_K6/48 Ub3	30	1022.55	0.098353	2.15781	0.249628	6.21189	0.021376
UCHL5_HUMAN	114	121	FKEFSQSF	7	1019.48	UCH37C88A_DEUBAD_K6/48 Ub3	60	1022.86	0.099309	2.47007	0.250006	6.22917	0.023194
UCHL5_HUMAN	114	121	FKEFSQSF	7	1019.48	UCH37C88A_DEUBAD_K6/48 Ub3	120	1023.13	0.097575	2.74476	0.249322	6.21232	0.009961
UCHL5_HUMAN	114	121	FKEFSQSF	7	1019.48	UCH37C88A_DEUBAD_Ub	0	1020	0.030016	0	0	6.22506	0.056755
UCHL5_HUMAN	114	121	FKEFSQSF	7	1019.48	UCH37C88A_DEUBAD_Ub	1	1021.71	0.032554	1.70606	0.04428	6.10136	0.005781
UCHL5_HUMAN	114	121	FKEFSQSF	7	1019.48	UCH37C88A_DEUBAD_Ub	10	1022.37	0.105183	2.36777	0.109382	6.08888	0.001384
UCHL5_HUMAN	114	121	FKEFSQSF	7	1019.48	UCH37C88A_DEUBAD_Ub	30	1023.08	0	3.08349	0.030016	6.09021	0
UCHL5_HUMAN	114	121	FKEFSQSF	7	1019.48	UCH37C88A_DEUBAD_Ub	60	1023.3	0.09924	3.29663	0.10368	6.09568	0.003615
UCHL5_HUMAN	114	121	FKEFSQSF	7	1019.48	UCH37C88A_DEUBAD_Ub	120	1023.56	0.052328	3.55601	0.060326	6.0929	0.005435
UCHL5_HUMAN	114	122	FKEFSQSFD	8	1134.51	UCH37C88A_DEUBAD	0	1135.29	0.078909	0	0	6.00562	0.053232
UCHL5_HUMAN	114	122	FKEFSQSFD	8	1134.51	UCH37C88A_DEUBAD	1	1136.96	0.088256	1.67821	0.118388	6.00686	0.031747
UCHL5_HUMAN	114	122	FKEFSQSFD	8	1134.51	UCH37C88A_DEUBAD	10	1137.64	0.13745	2.35306	0.15849	6.00855	0.024905
UCHL5_HUMAN	114	122	FKEFSQSFD	8	1134.51	UCH37C88A_DEUBAD	30	1138.15	0.051677	2.86049	0.094324	6.00255	0.02166
UCHL5_HUMAN	114	122	FKEFSQSFD	8	1134.51	UCH37C88A_DEUBAD	60	1138.47	0.054584	3.18155	0.095948	6.01138	0.021284
UCHL5_HUMAN	114	122	FKEFSQSFD	8	1134.51	UCH37C88A_DEUBAD	120	1138.74	0	3.45729	0.078909	5.99941	0
UCHL5_HUMAN	114	122	FKEFSQSFD	8	1134.51	UCH37C88A_DEUBAD_K48 Ub2	0	1135.29	0.078909	0	0	6.00562	0.053232
UCHL5_HUMAN	114	122	FKEFSQSFD	8	1134.51	UCH37C88A_DEUBAD_K48 Ub2	1	1136.46	0.066425	1.17277	0.103145	6.00064	0.029389
UCHL5_HUMAN	114	122	FKEFSQSFD	8	1134.51	UCH37C88A_DEUBAD_K48 Ub2	10	1136.86	0.04337	1.57854	0.090042	5.99106	0.029174
UCHL5_HUMAN	114	122	FKEFSQSFD	8	1134.51	UCH37C88A_DEUBAD_K48 Ub2	30	1137.23	0.102865	1.94711	0.129645	5.9881	0.037257
UCHL5_HUMAN	114	122	FKEFSQSFD	8	1134.51	UCH37C88A_DEUBAD_K48 Ub2	60	1137.59	0.130081	2.3045	0.152143	5.99423	0.029429
UCHL5_HUMAN	114	122	FKEFSQSFD	8	1134.51	UCH37C88A_DEUBAD_K48 Ub2	120	1137.53	0.065304	2.24576	0.102426	5.97493	0.02087
UCHL5_HUMAN	114	122	FKEFSQSFD	8	1134.51	UCH37C88A_DEUBAD_K48 Ub3	0	1135.29	0.078909	0	0	6.00562	0.053232
UCHL5_HUMAN	114	122	FKEFSQSFD	8	1134.51	UCH37C88A_DEUBAD_K48 Ub3	1	1136.63	0.016963	1.34224	0.080711	5.98384	0.001196
UCHL5_HUMAN	114	122	FKEFSQSFD	8	1134.51	UCH37C88A_DEUBAD_K48 Ub3	10	1137.05	0.02174	1.76675	0.081849	5.99176	0.002117
UCHL5_HUMAN	114	122	FKEFSQSFD	8	1134.51	UCH37C88A_DEUBAD_K48 Ub3	30	1137.38	0.017205	2.08999	0.080762	5.99579	0.001753
UCHL5_HUMAN	114	122	FKEFSQSFD	8	1134.51	UCH37C88A_DEUBAD_K48 Ub3	60	1137.66	0.032983	2.37292	0.085525	5.99997	0.005187
UCHL5_HUMAN	114	122	FKEFSQSFD	8	1134.51	UCH37C88A_DEUBAD_K48 Ub3	120	1137.9	0.005363	2.60949	0.079091	5.99011	0.014252
UCHL5_HUMAN	114	122	FKEFSQSFD	8	1134.51	UCH37C88A_DEUBAD_K6/48 Ub3	0	1135.29	0.078909	0	0	6.00562	0.053232
UCHL5_HUMAN	114	122	FKEFSQSFD	8	1134.51	UCH37C88A_DEUBAD_K6/48 Ub3	1	1136.9	0.085159	1.61171	0.116098	6.00781	0.018105
UCHL5_HUMAN	114	122	FKEFSQSFD	8	1134.51	UCH37C88A_DEUBAD_K6/48 Ub3	10	1137.6	0.108657	2.3144	0.134287	5.9918	0.02209
UCHL5_HUMAN	114	122	FKEFSQSFD	8	1134.51	UCH37C88A_DEUBAD_K6/48 Ub3	30	1138.02	0.131731	2.72997	0.153556	5.99284	0.022844
UCHL5_HUMAN	114	122	FKEFSQSFD	8	1134.51	UCH37C88A_DEUBAD_K6/48 Ub3	60	1138.36	0.13909	3.0716	0.159915	5.99994	0.021233
UCHL5_HUMAN	114	122	FKEFSQSFD	8	1134.51	UCH37C88A_DEUBAD_K6/48 Ub3	120	1138.62	0.113689	3.33668	0.13839	5.98514	0.00552
UCHL5_HUMAN	114	122	FKEFSQSFD	8	1134.51	UCH37C88A_DEUBAD_Ub	0	1135.29	0.078909	0	0	6.00562	0.053232
UCHL5_HUMAN	114	122	FKEFSQSFD	8	1134.51	UCH37C88A_DEUBAD_Ub	1	1137.49	0.064802	2.2082	0.102107	5.89195	0.00518
UCHL5_HUMAN	114	122	FKEFSQSFD	8	1134.51	UCH37C88A_DEUBAD_Ub	10	1138.06	0.120133	2.77245	0.143731	5.88318	0.001352
UCHL5_HUMAN	114	122	FKEFSQSFD	8	1134.51	UCH37C88A_DEUBAD_Ub	30	1138.81	0.084073	3.52032	0.115303	5.87991	0.000743
UCHL5_HUMAN	114	122	FKEFSQSFD	8	1134.51	UCH37C88A_DEUBAD_Ub	60	1138.93	0.089689	3.64443	0.11946	5.88626	0.00421
UCHL5_HUMAN	114	122	FKEFSQSFD	8	1134.51	UCH37C88A_DEUBAD_Ub	120	1139.12	0.038878	3.83453	0.087967	5.88154	0.00441
UCHL5_HUMAN	115	122	KEFSQSFD	7	987.442	UCH37C88A_DEUBAD	0	987.891	0.046577	0	0	5.22872	0.041669
UCHL5_HUMAN	115	122	KEFSQSFD	7	987.442	UCH37C88A_DEUBAD	1	989.703	0	1.81245	0.046577	5.20745	0
UCHL5_HUMAN	115	122	KEFSQSFD	7	987.442	UCH37C88A_DEUBAD	10	990.425	0.062105	2.53429	0.07763	5.23688	0.022165
UCHL5_HUMAN	115	122	KEFSQSFD	7	987.442	UCH37C88A_DEUBAD	30	990.888	0.005426	2.99781	0.046892	5.22821	0.017368
UCHL5_HUMAN	115	122	KEFSQSFD	7	987.442	UCH37C88A_DEUBAD	60	991.131	0.002505	3.24024	0.046644	5.2316	0.018151
UCHL5_HUMAN	115	122	KEFSQSFD	7	987.442	UCH37C88A_DEUBAD	120	991.568	0	3.677	0.046577	5.21997	0
UCHL5_HUMAN	115	122	KEFSQSFD	7	987.442	UCH37C88A_DEUBAD_K48 Ub2	0	987.891	0.046577	0	0	5.22872	0.041669
UCHL5_HUMAN	115	122	KEFSQSFD	7	987.442	UCH37C88A_DEUBAD_K48 Ub2	1	989.179	0.080281	1.28884	0.092814	5.21216	0.030634
UCHL5_HUMAN	115	122	KEFSQSFD	7	987.442	UCH37C88A_DEUBAD_K48 Ub2	10	989.623	0.048303	1.73274	0.067101	5.1982	0.02059
UCHL5_HUMAN	115	122	KEFSQSFD	7	987.442	UCH37C88A_DEUBAD_K48 Ub2	30	989.922	0.087255	2.03182	0.098908	5.20129	0.03452
UCHL5_HUMAN	115	122	KEFSQSFD	7	987.442	UCH37C88A_DEUBAD_K48 Ub2	60	990.253	0.11241	2.36292	0.121678	5.19569	0.02255
UCHL5_HUMAN	115	122	KEFSQSFD	7	987.442	UCH37C88A_DEUBAD_K48 Ub2	120	990.256	0.106081	2.36528	0.115856	5.19228	0.026263
UCHL5_HUMAN	115	122	KEFSQSFD	7	987.442	UCH37C88A_DEUBAD_K48 Ub3	0	987.891	0.046577	0	0	5.22872	0.041669
UCHL5_HUMAN	115	122	KEFSQSFD	7	987.442	UCH37C88A_DEUBAD_K48 Ub3	1	989.247	0.016339	1.35689	0.049359	5.18682	0.002241
UCHL5_HUMAN	115	122	KEFSQSFD	7	987.442	UCH37C88A_DEUBAD_K48 Ub3	10	989.642	0.049119	1.75132	0.067691	5.20699	0.00269
UCHL5_HUMAN	115	122	KEFSQSFD	7	987.442	UCH37C88A_DEUBAD_K48 Ub3	30	990.08	0.024356	2.18919	0.05256	5.20609	0.001051
UCHL5_HUMAN	115	122	KEFSQSFD	7	987.442	UCH37C88A_DEUBAD_K48 Ub3	60	990.298	0.019139	2.4079	0.050356	5.20392	0.002904
UCHL5_HUMAN	115	122	KEFSQSFD	7	987.442	UCH37C88A_DEUBAD_K48 Ub3	120	990.54	0.022113	2.64916	0.051559	5.20209	0.013905
UCHL5_HUMAN	115	122	KEFSQSFD	7	987.442	UCH37C88A_DEUBAD_K6/48 Ub3	0	987.891	0.046577	0	0	5.22872	0.041669
UCHL5_HUMAN	115	122	KEFSQSFD	7	987.442	UCH37C88A_DEUBAD_K6/48 Ub3	1	989.371	0.01137	1.48052	0.047945	5.20546	0.005615
UCHL5_HUMAN	115	122	KEFSQSFD	7	987.442	UCH37C88A_DEUBAD_K6/48 Ub3	10	990.261	0.124594	2.37062	0.133015	5.20211	0.026796
UCHL5_HUMAN	115	122	KEFSQSFD	7	987.442	UCH37C88A_DEUBAD_K6/48 Ub3	30	990.469	0.094781	2.57841	0.105607	5.1822	0.002921
UCHL5_HUMAN	115	122	KEFSQSFD	7	987.442	UCH37C88A_DEUBAD_K6/48 Ub3	60	990.882	0.040523	2.99186	0.061737	5.20056	0.016127
UCHL5_HUMAN	115	122	KEFSQSFD	7	987.442	UCH37C88A_DEUBAD_K6/48 Ub3	120	991.12	0.145879	3.22981	0.153134	5.19905	0.009167
UCHL5_HUMAN	115	122	KEFSQSFD	7	987.442	UCH37C88A_DEUBAD_Ub	0	987.891	0.046577	0	0	5.22872	0.041669
UCHL5_HUMAN	115	122	KEFSQSFD	7	987.442	UCH37C88A_DEUBAD_Ub	1	990.072	0.042504	2.18177	0.063055	5.09558	0.00922
UCHL5_HUMAN	115	122	KEFSQSFD	7	987.442	UCH37C88A_DEUBAD_Ub	10	990.609	0.072198	2.71864	0.085918	5.08331	0.000403
UCHL5_HUMAN	115	122	KEFSQSFD	7	987.442	UCH37C88A_DEUBAD_Ub	30	991.1	0.071346	3.20964	0.085203	5.08369	1.96059e-05
UCHL5_HUMAN	115	122	KEFSQSFD	7	987.442	UCH37C88A_DEUBAD_Ub	60	991.187	0.015115	3.29654	0.048968	5.08629	0.000593
UCHL5_HUMAN	115	122	KEFSQSFD	7	987.442	UCH37C88A_DEUBAD_Ub	120	991.34	0.018321	3.44941	0.05005	5.08141	0.005349
UCHL5_HUMAN	115	125	KEFSQSFDAAM	10	1260.56	UCH37C88A_DEUBAD	0	1261.23	0.04018	0	0	6.03374	0.054472
UCHL5_HUMAN	115	125	KEFSQSFDAAM	10	1260.56	UCH37C88A_DEUBAD	1	1264.81	0	3.57758	0.04018	6.02205	0
UCHL5_HUMAN	115	125	KEFSQSFDAAM	10	1260.56	UCH37C88A_DEUBAD	10	1265.94	0	4.71115	0.04018	6.01703	0
UCHL5_HUMAN	115	125	KEFSQSFDAAM	10	1260.56	UCH37C88A_DEUBAD	30	1266.63	0	5.40548	0.04018	6.02532	0
UCHL5_HUMAN	115	125	KEFSQSFDAAM	10	1260.56	UCH37C88A_DEUBAD	60	1267.12	0.023891	5.8939	0.046746	6.04515	0.018681
UCHL5_HUMAN	115	125	KEFSQSFDAAM	10	1260.56	UCH37C88A_DEUBAD	120	1267.5	0	6.27181	0.04018	6.03489	0
UCHL5_HUMAN	115	125	KEFSQSFDAAM	10	1260.56	UCH37C88A_DEUBAD_K48 Ub2	0	1261.23	0.04018	0	0	6.03374	0.054472
UCHL5_HUMAN	115	125	KEFSQSFDAAM	10	1260.56	UCH37C88A_DEUBAD_K48 Ub2	1	1264.32	0.065601	3.08705	0.076928	6.04209	0.025707
UCHL5_HUMAN	115	125	KEFSQSFDAAM	10	1260.56	UCH37C88A_DEUBAD_K48 Ub2	10	1264.88	0.151192	3.64974	0.15644	6.04212	0.024358
UCHL5_HUMAN	115	125	KEFSQSFDAAM	10	1260.56	UCH37C88A_DEUBAD_K48 Ub2	30	1265.22	0.121263	3.98987	0.127747	6.0331	0.033956
UCHL5_HUMAN	115	125	KEFSQSFDAAM	10	1260.56	UCH37C88A_DEUBAD_K48 Ub2	60	1265.41	0.097833	4.18137	0.105762	6.03873	0.029163
UCHL5_HUMAN	115	125	KEFSQSFDAAM	10	1260.56	UCH37C88A_DEUBAD_K48 Ub2	120	1265.69	0.010375	4.46066	0.041498	6.03056	0.024541
UCHL5_HUMAN	115	125	KEFSQSFDAAM	10	1260.56	UCH37C88A_DEUBAD_K48 Ub3	0	1261.23	0.04018	0	0	6.03374	0.054472
UCHL5_HUMAN	115	125	KEFSQSFDAAM	10	1260.56	UCH37C88A_DEUBAD_K48 Ub3	1	1264.46	0.048824	3.2289	0.063232	6.02752	0.005391
UCHL5_HUMAN	115	125	KEFSQSFDAAM	10	1260.56	UCH37C88A_DEUBAD_K48 Ub3	10	1264.88	0.018014	3.64893	0.044033	6.04553	0.00433
UCHL5_HUMAN	115	125	KEFSQSFDAAM	10	1260.56	UCH37C88A_DEUBAD_K48 Ub3	30	1265.33	0.000187	4.09914	0.04018	6.05233	0.003389
UCHL5_HUMAN	115	125	KEFSQSFDAAM	10	1260.56	UCH37C88A_DEUBAD_K48 Ub3	60	1265.58	0.02277	4.35509	0.046183	6.04522	0.000663
UCHL5_HUMAN	115	125	KEFSQSFDAAM	10	1260.56	UCH37C88A_DEUBAD_K48 Ub3	120	1265.96	0.068933	4.72693	0.079789	6.04073	0.01443
UCHL5_HUMAN	115	125	KEFSQSFDAAM	10	1260.56	UCH37C88A_DEUBAD_K6/48 Ub3	0	1261.23	0.04018	0	0	6.03374	0.054472
UCHL5_HUMAN	115	125	KEFSQSFDAAM	10	1260.56	UCH37C88A_DEUBAD_K6/48 Ub3	1	1264.48	0	3.25101	0.04018	6.03609	0
UCHL5_HUMAN	115	125	KEFSQSFDAAM	10	1260.56	UCH37C88A_DEUBAD_K6/48 Ub3	10	1265.53	0.157919	4.29971	0.16295	6.02707	0.015946
UCHL5_HUMAN	115	125	KEFSQSFDAAM	10	1260.56	UCH37C88A_DEUBAD_K6/48 Ub3	30	1266.03	0.065315	4.79737	0.076685	6.03041	0.011869
UCHL5_HUMAN	115	125	KEFSQSFDAAM	10	1260.56	UCH37C88A_DEUBAD_K6/48 Ub3	60	1266.42	0.017642	5.18629	0.043882	6.0383	0.014504
UCHL5_HUMAN	115	125	KEFSQSFDAAM	10	1260.56	UCH37C88A_DEUBAD_K6/48 Ub3	120	1266.75	0.138934	5.52203	0.144627	6.03123	0.00391
UCHL5_HUMAN	115	125	KEFSQSFDAAM	10	1260.56	UCH37C88A_DEUBAD_Ub	0	1261.23	0.04018	0	0	6.03374	0.054472
UCHL5_HUMAN	115	125	KEFSQSFDAAM	10	1260.56	UCH37C88A_DEUBAD_Ub	1	1265.11	0.028004	3.88489	0.048976	5.9395	0.005326
UCHL5_HUMAN	115	125	KEFSQSFDAAM	10	1260.56	UCH37C88A_DEUBAD_Ub	10	1265.81	0.135577	4.58103	0.141406	5.92775	0.002683
UCHL5_HUMAN	115	125	KEFSQSFDAAM	10	1260.56	UCH37C88A_DEUBAD_Ub	30	1266.75	0.206333	5.52132	0.210209	5.92826	0.000251
UCHL5_HUMAN	115	125	KEFSQSFDAAM	10	1260.56	UCH37C88A_DEUBAD_Ub	60	1267.23	0.106607	6.00015	0.113927	5.93148	0.004054
UCHL5_HUMAN	115	125	KEFSQSFDAAM	10	1260.56	UCH37C88A_DEUBAD_Ub	120	1267.28	0.034095	6.04848	0.052697	5.92706	0.005645
UCHL5_HUMAN	118	127	SQSFDAAMKG	9	1041.47	UCH37C88A_DEUBAD	0	1041.97	0.017118	0	0	6.25217	0.05253
UCHL5_HUMAN	118	127	SQSFDAAMKG	9	1041.47	UCH37C88A_DEUBAD	1	1043.25	0	1.27507	0.017118	6.21745	0
UCHL5_HUMAN	118	127	SQSFDAAMKG	9	1041.47	UCH37C88A_DEUBAD	10	1043.96	0.157657	1.98514	0.158584	6.24601	0.022969
UCHL5_HUMAN	118	127	SQSFDAAMKG	9	1041.47	UCH37C88A_DEUBAD	30	1044.46	0.044301	2.48207	0.047493	6.23146	0.020553
UCHL5_HUMAN	118	127	SQSFDAAMKG	9	1041.47	UCH37C88A_DEUBAD	60	1044.82	0.062406	2.8502	0.064711	6.23968	0.020138
UCHL5_HUMAN	118	127	SQSFDAAMKG	9	1041.47	UCH37C88A_DEUBAD	120	1045.09	0	3.11188	0.017118	6.22898	0
UCHL5_HUMAN	118	127	SQSFDAAMKG	9	1041.47	UCH37C88A_DEUBAD_K48 Ub2	0	1041.96	0.048156	0	0	6.25062	0.05337
UCHL5_HUMAN	118	127	SQSFDAAMKG	9	1041.47	UCH37C88A_DEUBAD_K48 Ub2	1	1042.95	0.069548	0.990451	0.084593	6.22489	0.024209
UCHL5_HUMAN	118	127	SQSFDAAMKG	9	1041.47	UCH37C88A_DEUBAD_K48 Ub2	10	1043.13	0.058334	1.17224	0.075643	6.21749	0.032712
UCHL5_HUMAN	118	127	SQSFDAAMKG	9	1041.47	UCH37C88A_DEUBAD_K48 Ub2	30	1043.3	0.042864	1.34147	0.064469	6.22962	0.035212
UCHL5_HUMAN	118	127	SQSFDAAMKG	9	1041.47	UCH37C88A_DEUBAD_K48 Ub2	60	1043.75	0.072113	1.78945	0.086714	6.22428	0.02659
UCHL5_HUMAN	118	127	SQSFDAAMKG	9	1041.47	UCH37C88A_DEUBAD_K48 Ub2	120	1043.72	0.087848	1.7646	0.100181	6.21351	0.0321
UCHL5_HUMAN	118	127	SQSFDAAMKG	9	1041.47	UCH37C88A_DEUBAD_K48 Ub3	0	1041.96	0.048156	0	0	6.25062	0.05337
UCHL5_HUMAN	118	127	SQSFDAAMKG	9	1041.47	UCH37C88A_DEUBAD_K48 Ub3	1	1043.09	0.013061	1.13129	0.049896	6.21652	0.00541
UCHL5_HUMAN	118	127	SQSFDAAMKG	9	1041.47	UCH37C88A_DEUBAD_K48 Ub3	10	1043.23	0.068102	1.26558	0.083408	6.22514	0.012002
UCHL5_HUMAN	118	127	SQSFDAAMKG	9	1041.47	UCH37C88A_DEUBAD_K48 Ub3	30	1043.23	0.1896	1.26655	0.19562	6.23295	0.009286
UCHL5_HUMAN	118	127	SQSFDAAMKG	9	1041.47	UCH37C88A_DEUBAD_K48 Ub3	60	1043.9	0.121829	1.93915	0.131001	6.23534	0.014852
UCHL5_HUMAN	118	127	SQSFDAAMKG	9	1041.47	UCH37C88A_DEUBAD_K48 Ub3	120	1044.11	0.03001	2.14758	0.056742	6.23595	0.027687
UCHL5_HUMAN	118	127	SQSFDAAMKG	9	1041.47	UCH37C88A_DEUBAD_K6/48 Ub3	0	1041.96	0.048156	0	0	6.25062	0.05337
UCHL5_HUMAN	118	127	SQSFDAAMKG	9	1041.47	UCH37C88A_DEUBAD_K6/48 Ub3	1	1043.31	0.020821	1.347	0.052464	6.24939	0.01816
UCHL5_HUMAN	118	127	SQSFDAAMKG	9	1041.47	UCH37C88A_DEUBAD_K6/48 Ub3	10	1043.71	0.054626	1.74708	0.072822	6.20627	0.00958
UCHL5_HUMAN	118	127	SQSFDAAMKG	9	1041.47	UCH37C88A_DEUBAD_K6/48 Ub3	30	1044.15	0.050537	2.18761	0.069807	6.20182	0.010358
UCHL5_HUMAN	118	127	SQSFDAAMKG	9	1041.47	UCH37C88A_DEUBAD_K6/48 Ub3	60	1044.59	0.044405	2.6252	0.065504	6.22618	0.008601
UCHL5_HUMAN	118	127	SQSFDAAMKG	9	1041.47	UCH37C88A_DEUBAD_K6/48 Ub3	120	1044.93	0.042543	2.972	0.064257	6.20336	0.009751
UCHL5_HUMAN	118	127	SQSFDAAMKG	9	1041.47	UCH37C88A_DEUBAD_Ub	0	1041.96	0.048156	0	0	6.25062	0.05337
UCHL5_HUMAN	118	127	SQSFDAAMKG	9	1041.47	UCH37C88A_DEUBAD_Ub	1	1043.57	0.048789	1.61012	0.068552	6.12015	0.007331
UCHL5_HUMAN	118	127	SQSFDAAMKG	9	1041.47	UCH37C88A_DEUBAD_Ub	10	1044.28	0.049122	2.32293	0.068789	6.10881	0.000662
UCHL5_HUMAN	118	127	SQSFDAAMKG	9	1041.47	UCH37C88A_DEUBAD_Ub	30	1044.96	0.072998	3.00275	0.087451	6.11118	0.000681
UCHL5_HUMAN	118	127	SQSFDAAMKG	9	1041.47	UCH37C88A_DEUBAD_Ub	60	1045.2	0.159258	3.23814	0.166379	6.11692	0.004701
UCHL5_HUMAN	118	127	SQSFDAAMKG	9	1041.47	UCH37C88A_DEUBAD_Ub	120	1045.46	0.064846	3.50371	0.080772	6.1146	0.00695
UCHL5_HUMAN	121	127	FDAAMKG	6	739.344	UCH37C88A_DEUBAD	0	741.681	0.028954	0	0	4.39827	0.029734
UCHL5_HUMAN	121	127	FDAAMKG	6	739.344	UCH37C88A_DEUBAD	1	742.928	0	1.24701	0.028954	4.3775	0
UCHL5_HUMAN	121	127	FDAAMKG	6	739.344	UCH37C88A_DEUBAD	10	743.107	0.131686	1.42609	0.134831	4.3938	0.018243
UCHL5_HUMAN	121	127	FDAAMKG	6	739.344	UCH37C88A_DEUBAD	30	743.434	0	1.75253	0.028954	4.3761	0
UCHL5_HUMAN	121	127	FDAAMKG	6	739.344	UCH37C88A_DEUBAD	60	743.777	0.070285	2.09602	0.076015	4.39039	0.01635
UCHL5_HUMAN	121	127	FDAAMKG	6	739.344	UCH37C88A_DEUBAD	120	744.292	0	2.61113	0.028954	4.37914	0
UCHL5_HUMAN	121	127	FDAAMKG	6	739.344	UCH37C88A_DEUBAD_K48 Ub2	0	741.681	0.028954	0	0	4.39827	0.029734
UCHL5_HUMAN	121	127	FDAAMKG	6	739.344	UCH37C88A_DEUBAD_K48 Ub2	1	742.757	0.071398	1.07592	0.077045	4.39752	0.011795
UCHL5_HUMAN	121	127	FDAAMKG	6	739.344	UCH37C88A_DEUBAD_K48 Ub2	10	742.917	0.113961	1.23551	0.117582	4.39052	0.014191
UCHL5_HUMAN	121	127	FDAAMKG	6	739.344	UCH37C88A_DEUBAD_K48 Ub2	30	742.988	0	1.30645	0.028954	4.36816	0
UCHL5_HUMAN	121	127	FDAAMKG	6	739.344	UCH37C88A_DEUBAD_K48 Ub2	60	743.192	0.076901	1.51088	0.082171	4.39175	0.015878
UCHL5_HUMAN	121	127	FDAAMKG	6	739.344	UCH37C88A_DEUBAD_K48 Ub2	120	742.919	0	1.2382	0.028954	4.3682	0
UCHL5_HUMAN	121	127	FDAAMKG	6	739.344	UCH37C88A_DEUBAD_K48 Ub3	0	741.7	0	0	0	4.37233	0
UCHL5_HUMAN	121	127	FDAAMKG	6	739.344	UCH37C88A_DEUBAD_K48 Ub3	1	742.898	0.005018	1.198	0.005018	4.38357	0.003761
UCHL5_HUMAN	121	127	FDAAMKG	6	739.344	UCH37C88A_DEUBAD_K48 Ub3	10	742.828	0.054892	1.1277	0.054892	4.39915	0.008409
UCHL5_HUMAN	121	127	FDAAMKG	6	739.344	UCH37C88A_DEUBAD_K48 Ub3	30	742.881	0.084196	1.1812	0.084196	4.3802	0.010714
UCHL5_HUMAN	121	127	FDAAMKG	6	739.344	UCH37C88A_DEUBAD_K48 Ub3	60	742.966	0.110984	1.26611	0.110984	4.38633	0.012356
UCHL5_HUMAN	121	127	FDAAMKG	6	739.344	UCH37C88A_DEUBAD_K48 Ub3	120	743.09	0.221858	1.3899	0.221858	4.38519	0.012421
UCHL5_HUMAN	121	127	FDAAMKG	6	739.344	UCH37C88A_DEUBAD_K6/48 Ub3	0	741.651	0.004881	0	0	4.43167	0.000596
UCHL5_HUMAN	121	127	FDAAMKG	6	739.344	UCH37C88A_DEUBAD_K6/48 Ub3	1	742.873	0.064088	1.2226	0.064274	4.40263	0.00687
UCHL5_HUMAN	121	127	FDAAMKG	6	739.344	UCH37C88A_DEUBAD_K6/48 Ub3	10	743.013	0.161863	1.36205	0.161936	4.3888	0.014405
UCHL5_HUMAN	121	127	FDAAMKG	6	739.344	UCH37C88A_DEUBAD_K6/48 Ub3	30	743.244	0.057354	1.59269	0.057561	4.38166	0.002958
UCHL5_HUMAN	121	127	FDAAMKG	6	739.344	UCH37C88A_DEUBAD_K6/48 Ub3	60	743.538	0.000505	1.88725	0.004907	4.39033	0.01102
UCHL5_HUMAN	121	127	FDAAMKG	6	739.344	UCH37C88A_DEUBAD_K6/48 Ub3	120	743.755	0.140266	2.10407	0.140351	4.38669	0.001611
UCHL5_HUMAN	121	127	FDAAMKG	6	739.344	UCH37C88A_DEUBAD_Ub	0	739.672	0.052942	0	0	4.13918	0.045398
UCHL5_HUMAN	121	127	FDAAMKG	6	739.344	UCH37C88A_DEUBAD_Ub	1	741.509	0.085282	1.83678	0.100378	4.02612	0.011722
UCHL5_HUMAN	121	127	FDAAMKG	6	739.344	UCH37C88A_DEUBAD_Ub	10	741.766	0.206759	2.09406	0.213429	4.00849	0.002533
UCHL5_HUMAN	121	127	FDAAMKG	6	739.344	UCH37C88A_DEUBAD_Ub	30	742.229	0.116143	2.55691	0.12764	4.01466	0.003898
UCHL5_HUMAN	121	127	FDAAMKG	6	739.344	UCH37C88A_DEUBAD_Ub	60	742.401	0.091357	2.72903	0.105589	4.02505	0.003848
UCHL5_HUMAN	121	127	FDAAMKG	6	739.344	UCH37C88A_DEUBAD_Ub	120	742.531	0.124852	2.85861	0.135613	4.01797	0.010195
UCHL5_HUMAN	122	134	DAAMKGLALSNSD	12	1292.62	UCH37C88A_DEUBAD	0	1293.33	0	0	0	5.19998	0
UCHL5_HUMAN	122	134	DAAMKGLALSNSD	12	1292.62	UCH37C88A_DEUBAD	1	1295.34	0	2.00124	0	5.21371	0
UCHL5_HUMAN	122	134	DAAMKGLALSNSD	12	1292.62	UCH37C88A_DEUBAD	10	1296.5	0.245508	3.16361	0.245508	5.23894	0.021725
UCHL5_HUMAN	122	134	DAAMKGLALSNSD	12	1292.62	UCH37C88A_DEUBAD	30	1297.5	0.119429	4.1667	0.119429	5.23058	0.018166
UCHL5_HUMAN	122	134	DAAMKGLALSNSD	12	1292.62	UCH37C88A_DEUBAD	60	1298.61	0.232409	5.27555	0.232409	5.23435	0.017146
UCHL5_HUMAN	122	134	DAAMKGLALSNSD	12	1292.62	UCH37C88A_DEUBAD	120	1299.66	0	6.32375	0	5.22267	0
UCHL5_HUMAN	122	134	DAAMKGLALSNSD	12	1292.62	UCH37C88A_DEUBAD_K48 Ub2	0	1293.33	0.023386	0	0	5.23126	0.036076
UCHL5_HUMAN	122	134	DAAMKGLALSNSD	12	1292.62	UCH37C88A_DEUBAD_K48 Ub2	1	1295.17	0.07174	1.84518	0.075455	5.24	0.011399
UCHL5_HUMAN	122	134	DAAMKGLALSNSD	12	1292.62	UCH37C88A_DEUBAD_K48 Ub2	10	1295.27	0.088167	1.94643	0.091215	5.23239	0.013474
UCHL5_HUMAN	122	134	DAAMKGLALSNSD	12	1292.62	UCH37C88A_DEUBAD_K48 Ub2	30	1295.33	0.080255	2.00674	0.083593	5.23059	0.018542
UCHL5_HUMAN	122	134	DAAMKGLALSNSD	12	1292.62	UCH37C88A_DEUBAD_K48 Ub2	60	1295.59	0.050116	2.26084	0.055304	5.22969	0.014146
UCHL5_HUMAN	122	134	DAAMKGLALSNSD	12	1292.62	UCH37C88A_DEUBAD_K48 Ub2	120	1295.87	0.103199	2.54653	0.105816	5.21587	0.008253
UCHL5_HUMAN	122	134	DAAMKGLALSNSD	12	1292.62	UCH37C88A_DEUBAD_K48 Ub3	0	1293.33	0.023386	0	0	5.23126	0.036076
UCHL5_HUMAN	122	134	DAAMKGLALSNSD	12	1292.62	UCH37C88A_DEUBAD_K48 Ub3	1	1295.31	0.084518	1.98913	0.087694	5.23903	0.013469
UCHL5_HUMAN	122	134	DAAMKGLALSNSD	12	1292.62	UCH37C88A_DEUBAD_K48 Ub3	10	1295.5	0.119653	2.17345	0.121917	5.23751	0.013378
UCHL5_HUMAN	122	134	DAAMKGLALSNSD	12	1292.62	UCH37C88A_DEUBAD_K48 Ub3	30	1295.57	0.169989	2.24149	0.17159	5.23693	0.015079
UCHL5_HUMAN	122	134	DAAMKGLALSNSD	12	1292.62	UCH37C88A_DEUBAD_K48 Ub3	60	1295.84	0.267876	2.51377	0.268895	5.23695	0.011999
UCHL5_HUMAN	122	134	DAAMKGLALSNSD	12	1292.62	UCH37C88A_DEUBAD_K48 Ub3	120	1297.02	0.104761	3.69948	0.10734	5.23676	0.006636
UCHL5_HUMAN	122	134	DAAMKGLALSNSD	12	1292.62	UCH37C88A_DEUBAD_K6/48 Ub3	0	1293.33	0.023386	0	0	5.23126	0.036076
UCHL5_HUMAN	122	134	DAAMKGLALSNSD	12	1292.62	UCH37C88A_DEUBAD_K6/48 Ub3	1	1295.32	0.17373	1.99938	0.175297	5.24356	0.005756
UCHL5_HUMAN	122	134	DAAMKGLALSNSD	12	1292.62	UCH37C88A_DEUBAD_K6/48 Ub3	10	1296.55	0.062392	3.22214	0.066631	5.21903	0.000956
UCHL5_HUMAN	122	134	DAAMKGLALSNSD	12	1292.62	UCH37C88A_DEUBAD_K6/48 Ub3	30	1296.68	0.201237	3.35183	0.202591	5.22327	0.003388
UCHL5_HUMAN	122	134	DAAMKGLALSNSD	12	1292.62	UCH37C88A_DEUBAD_K6/48 Ub3	60	1297.68	0	4.35849	0.023386	5.22265	0
UCHL5_HUMAN	122	134	DAAMKGLALSNSD	12	1292.62	UCH37C88A_DEUBAD_K6/48 Ub3	120	1298.05	0.213039	4.72262	0.214319	5.2214	0.007807
UCHL5_HUMAN	122	134	DAAMKGLALSNSD	12	1292.62	UCH37C88A_DEUBAD_Ub	0	1293.33	0.023386	0	0	5.23126	0.036076
UCHL5_HUMAN	122	134	DAAMKGLALSNSD	12	1292.62	UCH37C88A_DEUBAD_Ub	1	1295.24	0.019232	1.91935	0.030278	5.22283	0.045916
UCHL5_HUMAN	122	134	DAAMKGLALSNSD	12	1292.62	UCH37C88A_DEUBAD_Ub	10	1296.65	0	3.32764	0.023386	5.12226	0
UCHL5_HUMAN	122	134	DAAMKGLALSNSD	12	1292.62	UCH37C88A_DEUBAD_Ub	30	1297.46	0	4.13809	0.023386	5.12373	0
UCHL5_HUMAN	122	134	DAAMKGLALSNSD	12	1292.62	UCH37C88A_DEUBAD_Ub	60	1298.27	0	4.94832	0.023386	5.12641	0
UCHL5_HUMAN	122	134	DAAMKGLALSNSD	12	1292.62	UCH37C88A_DEUBAD_Ub	120	1298.97	0	5.64036	0.023386	5.12601	0
UCHL5_HUMAN	128	134	LALSNSD	6	719.357	UCH37C88A_DEUBAD	0	719.842	0.058812	0	0	4.39537	0.030036
UCHL5_HUMAN	128	134	LALSNSD	6	719.357	UCH37C88A_DEUBAD	1	721.001	0	1.15913	0.058812	4.37508	0
UCHL5_HUMAN	128	134	LALSNSD	6	719.357	UCH37C88A_DEUBAD	10	721.18	0.156195	1.3386	0.1669	4.39203	0.018491
UCHL5_HUMAN	128	134	LALSNSD	6	719.357	UCH37C88A_DEUBAD	30	721.474	0.080644	1.63276	0.099811	4.38654	0.017886
UCHL5_HUMAN	128	134	LALSNSD	6	719.357	UCH37C88A_DEUBAD	60	721.823	0.077286	1.981	0.097119	4.38983	0.015753
UCHL5_HUMAN	128	134	LALSNSD	6	719.357	UCH37C88A_DEUBAD	120	722.373	0	2.53184	0.058812	4.37746	0
UCHL5_HUMAN	128	134	LALSNSD	6	719.357	UCH37C88A_DEUBAD_K48 Ub2	0	719.842	0.058812	0	0	4.39537	0.030036
UCHL5_HUMAN	128	134	LALSNSD	6	719.357	UCH37C88A_DEUBAD_K48 Ub2	1	720.843	0.097475	1.00128	0.113843	4.39504	0.011791
UCHL5_HUMAN	128	134	LALSNSD	6	719.357	UCH37C88A_DEUBAD_K48 Ub2	10	720.892	0.108834	1.05017	0.123708	4.3883	0.014641
UCHL5_HUMAN	128	134	LALSNSD	6	719.357	UCH37C88A_DEUBAD_K48 Ub2	30	720.95	0.134819	1.10887	0.147088	4.38504	0.017326
UCHL5_HUMAN	128	134	LALSNSD	6	719.357	UCH37C88A_DEUBAD_K48 Ub2	60	721.206	0.106252	1.36465	0.121443	4.3849	0.013825
UCHL5_HUMAN	128	134	LALSNSD	6	719.357	UCH37C88A_DEUBAD_K48 Ub2	120	720.992	0.04004	1.14994	0.071148	4.37134	0.003248
UCHL5_HUMAN	128	134	LALSNSD	6	719.357	UCH37C88A_DEUBAD_K48 Ub3	0	719.842	0.058812	0	0	4.39537	0.030036
UCHL5_HUMAN	128	134	LALSNSD	6	719.357	UCH37C88A_DEUBAD_K48 Ub3	1	721.022	0.01639	1.18044	0.061053	4.38164	0.003585
UCHL5_HUMAN	128	134	LALSNSD	6	719.357	UCH37C88A_DEUBAD_K48 Ub3	10	721.081	0.101142	1.2398	0.116999	4.38628	0.008891
UCHL5_HUMAN	128	134	LALSNSD	6	719.357	UCH37C88A_DEUBAD_K48 Ub3	30	721.03	0.111105	1.18865	0.125711	4.39076	0.010262
UCHL5_HUMAN	128	134	LALSNSD	6	719.357	UCH37C88A_DEUBAD_K48 Ub3	60	721.148	0.070278	1.30608	0.09164	4.39423	0.005919
UCHL5_HUMAN	128	134	LALSNSD	6	719.357	UCH37C88A_DEUBAD_K48 Ub3	120	721.35	0.029511	1.50833	0.065801	4.39322	0.003775
UCHL5_HUMAN	128	134	LALSNSD	6	719.357	UCH37C88A_DEUBAD_K6/48 Ub3	0	719.842	0.058812	0	0	4.39537	0.030036
UCHL5_HUMAN	128	134	LALSNSD	6	719.357	UCH37C88A_DEUBAD_K6/48 Ub3	1	721.001	0.10804	1.15936	0.12301	4.40071	0.007711
UCHL5_HUMAN	128	134	LALSNSD	6	719.357	UCH37C88A_DEUBAD_K6/48 Ub3	10	721.227	0.033397	1.38579	0.067633	4.37753	0.001689
UCHL5_HUMAN	128	134	LALSNSD	6	719.357	UCH37C88A_DEUBAD_K6/48 Ub3	30	721.204	0.126	1.36233	0.13905	4.38451	0.008984
UCHL5_HUMAN	128	134	LALSNSD	6	719.357	UCH37C88A_DEUBAD_K6/48 Ub3	60	721.401	0.185894	1.55926	0.194976	4.39001	0.012263
UCHL5_HUMAN	128	134	LALSNSD	6	719.357	UCH37C88A_DEUBAD_K6/48 Ub3	120	721.815	0.113896	1.97348	0.128184	4.38212	0.007174
UCHL5_HUMAN	128	134	LALSNSD	6	719.357	UCH37C88A_DEUBAD_Ub	0	719.842	0.058812	0	0	4.39537	0.030036
UCHL5_HUMAN	128	134	LALSNSD	6	719.357	UCH37C88A_DEUBAD_Ub	1	721.148	0.179721	1.30608	0.189099	4.29907	0.065745
UCHL5_HUMAN	128	134	LALSNSD	6	719.357	UCH37C88A_DEUBAD_Ub	10	721.348	0.115571	1.50674	0.129674	4.2971	0.071473
UCHL5_HUMAN	128	134	LALSNSD	6	719.357	UCH37C88A_DEUBAD_Ub	30	721.762	0.06983	1.92023	0.091297	4.32048	0.079683
UCHL5_HUMAN	128	134	LALSNSD	6	719.357	UCH37C88A_DEUBAD_Ub	60	721.933	0.001651	2.09177	0.058835	4.32144	0.074853
UCHL5_HUMAN	128	134	LALSNSD	6	719.357	UCH37C88A_DEUBAD_Ub	120	722.153	0	2.31131	0.058812	4.25821	0
UCHL5_HUMAN	128	135	LALSNSDV	7	818.425	UCH37C88A_DEUBAD	0	818.754	0.050273	0	0	5.30819	0.035557
UCHL5_HUMAN	128	135	LALSNSDV	7	818.425	UCH37C88A_DEUBAD	1	820.569	0.169001	1.8149	0.176319	5.29359	0.001867
UCHL5_HUMAN	128	135	LALSNSDV	7	818.425	UCH37C88A_DEUBAD	10	820.922	0.123375	2.16804	0.133224	5.30892	0.022971
UCHL5_HUMAN	128	135	LALSNSDV	7	818.425	UCH37C88A_DEUBAD	30	821.24	0.164871	2.4864	0.172366	5.30164	0.016449
UCHL5_HUMAN	128	135	LALSNSDV	7	818.425	UCH37C88A_DEUBAD	60	821.586	0.136323	2.8323	0.145297	5.31084	0.016622
UCHL5_HUMAN	128	135	LALSNSDV	7	818.425	UCH37C88A_DEUBAD	120	822.018	0	3.2643	0.050273	5.30123	0
UCHL5_HUMAN	128	135	LALSNSDV	7	818.425	UCH37C88A_DEUBAD_K48 Ub2	0	818.754	0.050273	0	0	5.30819	0.035557
UCHL5_HUMAN	128	135	LALSNSDV	7	818.425	UCH37C88A_DEUBAD_K48 Ub2	1	820.063	0.119865	1.30882	0.129981	5.31402	0.009273
UCHL5_HUMAN	128	135	LALSNSDV	7	818.425	UCH37C88A_DEUBAD_K48 Ub2	10	820.601	0.053682	1.84711	0.073547	5.30955	0.011749
UCHL5_HUMAN	128	135	LALSNSDV	7	818.425	UCH37C88A_DEUBAD_K48 Ub2	30	820.724	0.0881	1.96992	0.101435	5.30554	0.013254
UCHL5_HUMAN	128	135	LALSNSDV	7	818.425	UCH37C88A_DEUBAD_K48 Ub2	60	820.881	0.085	2.12651	0.098754	5.30352	0.011595
UCHL5_HUMAN	128	135	LALSNSDV	7	818.425	UCH37C88A_DEUBAD_K48 Ub2	120	820.74	0.005359	1.98623	0.050558	5.29307	0.003696
UCHL5_HUMAN	128	135	LALSNSDV	7	818.425	UCH37C88A_DEUBAD_K48 Ub3	0	818.754	0.050273	0	0	5.30819	0.035557
UCHL5_HUMAN	128	135	LALSNSDV	7	818.425	UCH37C88A_DEUBAD_K48 Ub3	1	820.257	0.034584	1.50319	0.06102	5.31603	0.009518
UCHL5_HUMAN	128	135	LALSNSDV	7	818.425	UCH37C88A_DEUBAD_K48 Ub3	10	820.71	0.099341	1.95588	0.111338	5.31526	0.012243
UCHL5_HUMAN	128	135	LALSNSDV	7	818.425	UCH37C88A_DEUBAD_K48 Ub3	30	820.758	0.088337	2.00425	0.101641	5.31574	0.016864
UCHL5_HUMAN	128	135	LALSNSDV	7	818.425	UCH37C88A_DEUBAD_K48 Ub3	60	820.758	0.129487	2.00421	0.138904	5.31372	0.01412
UCHL5_HUMAN	128	135	LALSNSDV	7	818.425	UCH37C88A_DEUBAD_K48 Ub3	120	820.905	0.1474	2.15147	0.155737	5.30884	0.017444
UCHL5_HUMAN	128	135	LALSNSDV	7	818.425	UCH37C88A_DEUBAD_K6/48 Ub3	0	818.754	0.050273	0	0	5.30819	0.035557
UCHL5_HUMAN	128	135	LALSNSDV	7	818.425	UCH37C88A_DEUBAD_K6/48 Ub3	1	820.302	0.014395	1.54784	0.052293	5.32196	0.005304
UCHL5_HUMAN	128	135	LALSNSDV	7	818.425	UCH37C88A_DEUBAD_K6/48 Ub3	10	820.87	0.128042	2.11566	0.137558	5.30521	0.011938
UCHL5_HUMAN	128	135	LALSNSDV	7	818.425	UCH37C88A_DEUBAD_K6/48 Ub3	30	820.87	0.10827	2.11635	0.119372	5.30748	0.010165
UCHL5_HUMAN	128	135	LALSNSDV	7	818.425	UCH37C88A_DEUBAD_K6/48 Ub3	60	821.043	0.141995	2.28851	0.150632	5.30592	0.012292
UCHL5_HUMAN	128	135	LALSNSDV	7	818.425	UCH37C88A_DEUBAD_K6/48 Ub3	120	821.4	0.130953	2.64587	0.140272	5.30401	0.010652
UCHL5_HUMAN	128	135	LALSNSDV	7	818.425	UCH37C88A_DEUBAD_Ub	0	818.754	0.050273	0	0	5.30819	0.035557
UCHL5_HUMAN	128	135	LALSNSDV	7	818.425	UCH37C88A_DEUBAD_Ub	1	820.807	0.056243	2.05254	0.075436	5.30563	0.049021
UCHL5_HUMAN	128	135	LALSNSDV	7	818.425	UCH37C88A_DEUBAD_Ub	10	820.909	0.14093	2.15545	0.149629	5.30343	0.056537
UCHL5_HUMAN	128	135	LALSNSDV	7	818.425	UCH37C88A_DEUBAD_Ub	30	821.254	0.001344	2.49955	0.050291	5.31953	0.04588
UCHL5_HUMAN	128	135	LALSNSDV	7	818.425	UCH37C88A_DEUBAD_Ub	60	821.499	0.00374	2.74466	0.050412	5.31161	0.044985
UCHL5_HUMAN	128	135	LALSNSDV	7	818.425	UCH37C88A_DEUBAD_Ub	120	821.548	0	2.79362	0.050273	5.19232	0
UCHL5_HUMAN	134	143	DVIRQVHNSF	9	1214.63	UCH37C88A_DEUBAD	0	1215.56	0.092951	0	0	5.27518	0.041758
UCHL5_HUMAN	134	143	DVIRQVHNSF	9	1214.63	UCH37C88A_DEUBAD	1	1216.4	0.066894	0.84257	0.11452	5.26986	0.02708
UCHL5_HUMAN	134	143	DVIRQVHNSF	9	1214.63	UCH37C88A_DEUBAD	10	1216.67	0.252729	1.1118	0.26928	5.26988	0.022365
UCHL5_HUMAN	134	143	DVIRQVHNSF	9	1214.63	UCH37C88A_DEUBAD	30	1216.73	0.149546	1.17587	0.17608	5.2624	0.018816
UCHL5_HUMAN	134	143	DVIRQVHNSF	9	1214.63	UCH37C88A_DEUBAD	60	1216.88	0.187437	1.3278	0.209219	5.26619	0.019037
UCHL5_HUMAN	134	143	DVIRQVHNSF	9	1214.63	UCH37C88A_DEUBAD	120	1217.27	0.04377	1.71109	0.102741	5.2531	0.001298
UCHL5_HUMAN	134	143	DVIRQVHNSF	9	1214.63	UCH37C88A_DEUBAD_K48 Ub2	0	1215.56	0.092951	0	0	5.27518	0.041758
UCHL5_HUMAN	134	143	DVIRQVHNSF	9	1214.63	UCH37C88A_DEUBAD_K48 Ub2	1	1216.43	0.154792	0.872526	0.180556	5.26068	0.019431
UCHL5_HUMAN	134	143	DVIRQVHNSF	9	1214.63	UCH37C88A_DEUBAD_K48 Ub2	10	1216.82	0.131372	1.26364	0.16093	5.2518	0.023411
UCHL5_HUMAN	134	143	DVIRQVHNSF	9	1214.63	UCH37C88A_DEUBAD_K48 Ub2	30	1217.19	0.197023	1.63082	0.217848	5.24719	0.030646
UCHL5_HUMAN	134	143	DVIRQVHNSF	9	1214.63	UCH37C88A_DEUBAD_K48 Ub2	60	1217.49	0.145433	1.93566	0.1726	5.24609	0.023957
UCHL5_HUMAN	134	143	DVIRQVHNSF	9	1214.63	UCH37C88A_DEUBAD_K48 Ub2	120	1217.29	0.038294	1.73549	0.10053	5.23096	0.018949
UCHL5_HUMAN	134	143	DVIRQVHNSF	9	1214.63	UCH37C88A_DEUBAD_K48 Ub3	0	1215.56	0.092951	0	0	5.27518	0.041758
UCHL5_HUMAN	134	143	DVIRQVHNSF	9	1214.63	UCH37C88A_DEUBAD_K48 Ub3	1	1216.48	0.248912	0.922522	0.265701	5.25602	0.022786
UCHL5_HUMAN	134	143	DVIRQVHNSF	9	1214.63	UCH37C88A_DEUBAD_K48 Ub3	10	1216.98	0.229924	1.42265	0.248002	5.26129	0.015893
UCHL5_HUMAN	134	143	DVIRQVHNSF	9	1214.63	UCH37C88A_DEUBAD_K48 Ub3	30	1217.26	0.168779	1.70223	0.192681	5.25204	0.001933
UCHL5_HUMAN	134	143	DVIRQVHNSF	9	1214.63	UCH37C88A_DEUBAD_K48 Ub3	60	1217.25	0.155363	1.6953	0.181046	5.25748	0.013023
UCHL5_HUMAN	134	143	DVIRQVHNSF	9	1214.63	UCH37C88A_DEUBAD_K48 Ub3	120	1217.55	0.333422	1.99355	0.346136	5.24357	0.008199
UCHL5_HUMAN	134	143	DVIRQVHNSF	9	1214.63	UCH37C88A_DEUBAD_K6/48 Ub3	0	1215.56	0.092951	0	0	5.27518	0.041758
UCHL5_HUMAN	134	143	DVIRQVHNSF	9	1214.63	UCH37C88A_DEUBAD_K6/48 Ub3	1	1216.51	0.248824	0.957464	0.265619	5.26823	0.011842
UCHL5_HUMAN	134	143	DVIRQVHNSF	9	1214.63	UCH37C88A_DEUBAD_K6/48 Ub3	10	1217.35	0.239447	1.79921	0.256855	5.23982	0.015921
UCHL5_HUMAN	134	143	DVIRQVHNSF	9	1214.63	UCH37C88A_DEUBAD_K6/48 Ub3	30	1217.36	0.15777	1.79949	0.183115	5.24015	0.011077
UCHL5_HUMAN	134	143	DVIRQVHNSF	9	1214.63	UCH37C88A_DEUBAD_K6/48 Ub3	60	1217.56	0.246178	2.00337	0.263142	5.24817	0.016114
UCHL5_HUMAN	134	143	DVIRQVHNSF	9	1214.63	UCH37C88A_DEUBAD_K6/48 Ub3	120	1218.35	0.184284	2.79562	0.206399	5.23717	0.003446
UCHL5_HUMAN	134	143	DVIRQVHNSF	9	1214.63	UCH37C88A_DEUBAD_Ub	0	1215.56	0.092951	0	0	5.27518	0.041758
UCHL5_HUMAN	134	143	DVIRQVHNSF	9	1214.63	UCH37C88A_DEUBAD_Ub	1	1216.52	0.125274	0.963963	0.155992	5.23048	0.057393
UCHL5_HUMAN	134	143	DVIRQVHNSF	9	1214.63	UCH37C88A_DEUBAD_Ub	10	1216.89	0.280186	1.33397	0.295201	5.20748	0.058404
UCHL5_HUMAN	134	143	DVIRQVHNSF	9	1214.63	UCH37C88A_DEUBAD_Ub	30	1217.12	0.096604	1.56862	0.134061	5.23946	0.06188
UCHL5_HUMAN	134	143	DVIRQVHNSF	9	1214.63	UCH37C88A_DEUBAD_Ub	60	1217.27	0.245093	1.71515	0.262127	5.21157	0.051104
UCHL5_HUMAN	134	143	DVIRQVHNSF	9	1214.63	UCH37C88A_DEUBAD_Ub	120	1217.6	0.091187	2.04227	0.130212	5.15882	0.005283
UCHL5_HUMAN	135	143	VIRQVHNSF	8	1099.6	UCH37C88A_DEUBAD	0	1100.49	0.005514	0	0	4.28747	0.002523
UCHL5_HUMAN	135	143	VIRQVHNSF	8	1099.6	UCH37C88A_DEUBAD	1	1101.24	0	0.755235	0.005514	4.22688	0
UCHL5_HUMAN	135	143	VIRQVHNSF	8	1099.6	UCH37C88A_DEUBAD	10	1101.16	0	0.669045	0.005514	4.25772	0
UCHL5_HUMAN	135	143	VIRQVHNSF	8	1099.6	UCH37C88A_DEUBAD	30	1101.18	0	0.69143	0.005514	4.24849	0
UCHL5_HUMAN	135	143	VIRQVHNSF	8	1099.6	UCH37C88A_DEUBAD	60	1101.46	0.110201	0.970791	0.110339	4.23657	0.00415
UCHL5_HUMAN	135	143	VIRQVHNSF	8	1099.6	UCH37C88A_DEUBAD	120	1101.53	0	1.04571	0.005514	4.23956	0
UCHL5_HUMAN	135	143	VIRQVHNSF	8	1099.6	UCH37C88A_DEUBAD_K48 Ub2	0	1100.57	0.105617	0	0	4.23662	0.056321
UCHL5_HUMAN	135	143	VIRQVHNSF	8	1099.6	UCH37C88A_DEUBAD_K48 Ub2	1	1101.28	0.122828	0.708276	0.161993	4.22981	0.014626
UCHL5_HUMAN	135	143	VIRQVHNSF	8	1099.6	UCH37C88A_DEUBAD_K48 Ub2	10	1101.63	0.119644	1.05979	0.159592	4.22314	0.020668
UCHL5_HUMAN	135	143	VIRQVHNSF	8	1099.6	UCH37C88A_DEUBAD_K48 Ub2	30	1101.92	0.153667	1.34725	0.186463	4.21313	0.035799
UCHL5_HUMAN	135	143	VIRQVHNSF	8	1099.6	UCH37C88A_DEUBAD_K48 Ub2	60	1102.27	0.122177	1.70211	0.161499	4.2239	0.023235
UCHL5_HUMAN	135	143	VIRQVHNSF	8	1099.6	UCH37C88A_DEUBAD_K48 Ub2	120	1102	0.021438	1.4285	0.107771	4.20625	0.035253
UCHL5_HUMAN	135	143	VIRQVHNSF	8	1099.6	UCH37C88A_DEUBAD_K48 Ub3	0	1100.57	0.105617	0	0	4.23662	0.056321
UCHL5_HUMAN	135	143	VIRQVHNSF	8	1099.6	UCH37C88A_DEUBAD_K48 Ub3	1	1101.53	0.019785	0.963735	0.107454	4.22453	0.022693
UCHL5_HUMAN	135	143	VIRQVHNSF	8	1099.6	UCH37C88A_DEUBAD_K48 Ub3	10	1101.7	0.165843	1.12889	0.196618	4.22522	0.015013
UCHL5_HUMAN	135	143	VIRQVHNSF	8	1099.6	UCH37C88A_DEUBAD_K48 Ub3	30	1102.01	0.09024	1.43984	0.138918	4.2175	0.008945
UCHL5_HUMAN	135	143	VIRQVHNSF	8	1099.6	UCH37C88A_DEUBAD_K48 Ub3	60	1102.04	0.163988	1.4727	0.195057	4.22047	0.015229
UCHL5_HUMAN	135	143	VIRQVHNSF	8	1099.6	UCH37C88A_DEUBAD_K48 Ub3	120	1102.22	0.229352	1.64478	0.252502	4.21895	0.012957
UCHL5_HUMAN	135	143	VIRQVHNSF	8	1099.6	UCH37C88A_DEUBAD_K6/48 Ub3	0	1100.58	0.114863	0	0	4.23651	0.056281
UCHL5_HUMAN	135	143	VIRQVHNSF	8	1099.6	UCH37C88A_DEUBAD_K6/48 Ub3	1	1101.43	0.147141	0.852043	0.186665	4.2394	0.018686
UCHL5_HUMAN	135	143	VIRQVHNSF	8	1099.6	UCH37C88A_DEUBAD_K6/48 Ub3	10	1102.04	0.074121	1.46271	0.136702	4.21161	0.021616
UCHL5_HUMAN	135	143	VIRQVHNSF	8	1099.6	UCH37C88A_DEUBAD_K6/48 Ub3	30	1102.16	0.174495	1.57754	0.208907	4.20704	0.016724
UCHL5_HUMAN	135	143	VIRQVHNSF	8	1099.6	UCH37C88A_DEUBAD_K6/48 Ub3	60	1102.33	0.223924	1.7529	0.251665	4.2273	0.026406
UCHL5_HUMAN	135	143	VIRQVHNSF	8	1099.6	UCH37C88A_DEUBAD_K6/48 Ub3	120	1102.74	0.084142	2.16472	0.142385	4.21676	0.012736
UCHL5_HUMAN	135	143	VIRQVHNSF	8	1099.6	UCH37C88A_DEUBAD_Ub	0	1100.48	0.017532	0	0	4.28675	0.002349
UCHL5_HUMAN	135	143	VIRQVHNSF	8	1099.6	UCH37C88A_DEUBAD_Ub	1	1101.76	0.24096	1.27874	0.241596	4.18708	0.064613
UCHL5_HUMAN	135	143	VIRQVHNSF	8	1099.6	UCH37C88A_DEUBAD_Ub	10	1102.39	0	1.91474	0.017532	4.11997	0
UCHL5_HUMAN	135	143	VIRQVHNSF	8	1099.6	UCH37C88A_DEUBAD_Ub	30	1102.74	0.122756	2.26058	0.124002	4.12455	3.59863e-05
UCHL5_HUMAN	135	143	VIRQVHNSF	8	1099.6	UCH37C88A_DEUBAD_Ub	60	1102.75	0	2.27487	0.017532	4.12353	0
UCHL5_HUMAN	135	143	VIRQVHNSF	8	1099.6	UCH37C88A_DEUBAD_Ub	120	1102.8	0	2.32667	0.017532	4.14123	0
UCHL5_HUMAN	144	150	ARQQMFE	6	909.425	UCH37C88A_DEUBAD	0	910.04	0.121894	0	0	4.98172	0.044878
UCHL5_HUMAN	144	150	ARQQMFE	6	909.425	UCH37C88A_DEUBAD	1	913.75	0.080017	3.71055	0.145812	4.98571	0.02975
UCHL5_HUMAN	144	150	ARQQMFE	6	909.425	UCH37C88A_DEUBAD	10	913.626	0.0484	3.58665	0.131152	4.98222	0.023903
UCHL5_HUMAN	144	150	ARQQMFE	6	909.425	UCH37C88A_DEUBAD	30	913.656	0.053737	3.61654	0.133214	4.9797	0.018761
UCHL5_HUMAN	144	150	ARQQMFE	6	909.425	UCH37C88A_DEUBAD	60	913.665	0.047081	3.6248	0.130671	4.99085	0.014663
UCHL5_HUMAN	144	150	ARQQMFE	6	909.425	UCH37C88A_DEUBAD	120	913.647	0.022659	3.60736	0.123983	4.97691	0.002451
UCHL5_HUMAN	144	150	ARQQMFE	6	909.425	UCH37C88A_DEUBAD_K48 Ub2	0	910.04	0.121894	0	0	4.98172	0.044878
UCHL5_HUMAN	144	150	ARQQMFE	6	909.425	UCH37C88A_DEUBAD_K48 Ub2	1	913.389	0.035334	3.34876	0.126912	4.96507	0.028901
UCHL5_HUMAN	144	150	ARQQMFE	6	909.425	UCH37C88A_DEUBAD_K48 Ub2	10	913.613	0.07017	3.57287	0.140649	4.9606	0.02861
UCHL5_HUMAN	144	150	ARQQMFE	6	909.425	UCH37C88A_DEUBAD_K48 Ub2	30	913.64	0.064705	3.60035	0.138004	4.9578	0.034842
UCHL5_HUMAN	144	150	ARQQMFE	6	909.425	UCH37C88A_DEUBAD_K48 Ub2	60	913.64	0.026278	3.60003	0.124695	4.96824	0.030794
UCHL5_HUMAN	144	150	ARQQMFE	6	909.425	UCH37C88A_DEUBAD_K48 Ub2	120	913.627	0.034923	3.58671	0.126799	4.94801	0.02804
UCHL5_HUMAN	144	150	ARQQMFE	6	909.425	UCH37C88A_DEUBAD_K48 Ub3	0	910.04	0.121894	0	0	4.98172	0.044878
UCHL5_HUMAN	144	150	ARQQMFE	6	909.425	UCH37C88A_DEUBAD_K48 Ub3	1	913.38	0.127677	3.34021	0.176521	4.96161	0.030251
UCHL5_HUMAN	144	150	ARQQMFE	6	909.425	UCH37C88A_DEUBAD_K48 Ub3	10	913.594	0.068375	3.55456	0.139762	4.96962	0.01914
UCHL5_HUMAN	144	150	ARQQMFE	6	909.425	UCH37C88A_DEUBAD_K48 Ub3	30	913.6	0.042728	3.56058	0.129166	4.97078	0.020317
UCHL5_HUMAN	144	150	ARQQMFE	6	909.425	UCH37C88A_DEUBAD_K48 Ub3	60	913.63	0.061428	3.58993	0.136498	4.9688	0.020503
UCHL5_HUMAN	144	150	ARQQMFE	6	909.425	UCH37C88A_DEUBAD_K48 Ub3	120	913.602	0.035633	3.5617	0.126996	4.95575	0.012094
UCHL5_HUMAN	144	150	ARQQMFE	6	909.425	UCH37C88A_DEUBAD_K6/48 Ub3	0	910.04	0.121894	0	0	4.98172	0.044878
UCHL5_HUMAN	144	150	ARQQMFE	6	909.425	UCH37C88A_DEUBAD_K6/48 Ub3	1	913.49	0.171526	3.45043	0.210427	4.97866	0.018946
UCHL5_HUMAN	144	150	ARQQMFE	6	909.425	UCH37C88A_DEUBAD_K6/48 Ub3	10	913.624	0.060561	3.58402	0.13611	4.96024	0.027359
UCHL5_HUMAN	144	150	ARQQMFE	6	909.425	UCH37C88A_DEUBAD_K6/48 Ub3	30	913.62	0.035578	3.57983	0.126981	4.96012	0.024131
UCHL5_HUMAN	144	150	ARQQMFE	6	909.425	UCH37C88A_DEUBAD_K6/48 Ub3	60	913.675	0.037192	3.63502	0.127442	4.97566	0.024923
UCHL5_HUMAN	144	150	ARQQMFE	6	909.425	UCH37C88A_DEUBAD_K6/48 Ub3	120	913.609	0.027185	3.56903	0.124889	4.96052	0.011069
UCHL5_HUMAN	144	150	ARQQMFE	6	909.425	UCH37C88A_DEUBAD_Ub	0	910.04	0.121894	0	0	4.98172	0.044878
UCHL5_HUMAN	144	150	ARQQMFE	6	909.425	UCH37C88A_DEUBAD_Ub	1	913.557	0.043017	3.51728	0.129262	4.81684	0.007479
UCHL5_HUMAN	144	150	ARQQMFE	6	909.425	UCH37C88A_DEUBAD_Ub	10	913.469	0.02684	3.42921	0.124814	4.79701	0.002845
UCHL5_HUMAN	144	150	ARQQMFE	6	909.425	UCH37C88A_DEUBAD_Ub	30	913.431	0.02122	3.39092	0.123728	4.80287	0.00411
UCHL5_HUMAN	144	150	ARQQMFE	6	909.425	UCH37C88A_DEUBAD_Ub	60	913.441	0.047363	3.40124	0.130773	4.80729	0.001937
UCHL5_HUMAN	144	150	ARQQMFE	6	909.425	UCH37C88A_DEUBAD_Ub	120	913.38	0.080906	3.33998	0.146301	4.80292	0.005583
UCHL5_HUMAN	149	157	FEFDTKTSA	8	1045.48	UCH37C88A_DEUBAD	0	1045.97	0.034801	0	0	5.44868	0.045461
UCHL5_HUMAN	149	157	FEFDTKTSA	8	1045.48	UCH37C88A_DEUBAD	1	1050.88	0.109117	4.9025	0.114533	5.42427	0.024406
UCHL5_HUMAN	149	157	FEFDTKTSA	8	1045.48	UCH37C88A_DEUBAD	10	1050.57	0.12665	4.60018	0.131345	5.42809	0.018573
UCHL5_HUMAN	149	157	FEFDTKTSA	8	1045.48	UCH37C88A_DEUBAD	30	1050.67	0.01126	4.69513	0.036578	5.41689	0.016621
UCHL5_HUMAN	149	157	FEFDTKTSA	8	1045.48	UCH37C88A_DEUBAD	60	1050.69	0.001436	4.72002	0.034831	5.42467	0.016619
UCHL5_HUMAN	149	157	FEFDTKTSA	8	1045.48	UCH37C88A_DEUBAD	120	1050.55	0	4.58217	0.034801	5.41683	0
UCHL5_HUMAN	149	157	FEFDTKTSA	8	1045.48	UCH37C88A_DEUBAD_K48 Ub2	0	1045.97	0.034801	0	0	5.44868	0.045461
UCHL5_HUMAN	149	157	FEFDTKTSA	8	1045.48	UCH37C88A_DEUBAD_K48 Ub2	1	1050.59	0.150785	4.62163	0.154749	5.40938	0.016945
UCHL5_HUMAN	149	157	FEFDTKTSA	8	1045.48	UCH37C88A_DEUBAD_K48 Ub2	10	1050.52	0.132525	4.54329	0.137018	5.40728	0.015572
UCHL5_HUMAN	149	157	FEFDTKTSA	8	1045.48	UCH37C88A_DEUBAD_K48 Ub2	30	1050.59	0.167022	4.61926	0.170609	5.40451	0.029753
UCHL5_HUMAN	149	157	FEFDTKTSA	8	1045.48	UCH37C88A_DEUBAD_K48 Ub2	60	1050.57	0.147282	4.59675	0.151338	5.41089	0.018373
UCHL5_HUMAN	149	157	FEFDTKTSA	8	1045.48	UCH37C88A_DEUBAD_K48 Ub2	120	1050.44	0.072044	4.47027	0.080009	5.39944	0.022564
UCHL5_HUMAN	149	157	FEFDTKTSA	8	1045.48	UCH37C88A_DEUBAD_K48 Ub3	0	1045.97	0.034801	0	0	5.44868	0.045461
UCHL5_HUMAN	149	157	FEFDTKTSA	8	1045.48	UCH37C88A_DEUBAD_K48 Ub3	1	1050.58	0.238672	4.61053	0.241196	5.41257	0.022516
UCHL5_HUMAN	149	157	FEFDTKTSA	8	1045.48	UCH37C88A_DEUBAD_K48 Ub3	10	1050.49	0.12677	4.52052	0.13146	5.41594	0.016224
UCHL5_HUMAN	149	157	FEFDTKTSA	8	1045.48	UCH37C88A_DEUBAD_K48 Ub3	30	1050.53	0.165207	4.55621	0.168832	5.41994	0.014442
UCHL5_HUMAN	149	157	FEFDTKTSA	8	1045.48	UCH37C88A_DEUBAD_K48 Ub3	60	1050.53	0.147033	4.55758	0.151096	5.42018	0.011953
UCHL5_HUMAN	149	157	FEFDTKTSA	8	1045.48	UCH37C88A_DEUBAD_K48 Ub3	120	1050.4	0.15226	4.43141	0.156186	5.40617	0.012835
UCHL5_HUMAN	149	157	FEFDTKTSA	8	1045.48	UCH37C88A_DEUBAD_K6/48 Ub3	0	1045.97	0.034801	0	0	5.44868	0.045461
UCHL5_HUMAN	149	157	FEFDTKTSA	8	1045.48	UCH37C88A_DEUBAD_K6/48 Ub3	1	1050.34	0.092603	4.36747	0.098927	5.42744	0.007341
UCHL5_HUMAN	149	157	FEFDTKTSA	8	1045.48	UCH37C88A_DEUBAD_K6/48 Ub3	10	1050.47	0.039743	4.50165	0.052826	5.3985	0.009453
UCHL5_HUMAN	149	157	FEFDTKTSA	8	1045.48	UCH37C88A_DEUBAD_K6/48 Ub3	30	1050.54	0.092786	4.56465	0.099098	5.40393	0.007352
UCHL5_HUMAN	149	157	FEFDTKTSA	8	1045.48	UCH37C88A_DEUBAD_K6/48 Ub3	60	1050.64	0.176457	4.66875	0.179856	5.41812	0.013941
UCHL5_HUMAN	149	157	FEFDTKTSA	8	1045.48	UCH37C88A_DEUBAD_K6/48 Ub3	120	1050.44	0.142521	4.46752	0.146708	5.41035	0.005792
UCHL5_HUMAN	149	157	FEFDTKTSA	8	1045.48	UCH37C88A_DEUBAD_Ub	0	1045.97	0.034801	0	0	5.44868	0.045461
UCHL5_HUMAN	149	157	FEFDTKTSA	8	1045.48	UCH37C88A_DEUBAD_Ub	1	1050.81	0.098051	4.83519	0.104044	5.44111	7.5194e-06
UCHL5_HUMAN	149	157	FEFDTKTSA	8	1045.48	UCH37C88A_DEUBAD_Ub	10	1050.66	0.104205	4.68747	0.109863	5.44135	0.001258
UCHL5_HUMAN	149	157	FEFDTKTSA	8	1045.48	UCH37C88A_DEUBAD_Ub	30	1050.72	0.10867	4.74602	0.114106	5.44746	0.000569
UCHL5_HUMAN	149	157	FEFDTKTSA	8	1045.48	UCH37C88A_DEUBAD_Ub	60	1050.78	0	4.80711	0.034801	5.43879	0
UCHL5_HUMAN	149	157	FEFDTKTSA	8	1045.48	UCH37C88A_DEUBAD_Ub	120	1050.35	0	4.37714	0.034801	5.31597	0
UCHL5_HUMAN	149	162	FEFDTKTSAKEEDA	13	1617.73	UCH37C88A_DEUBAD	0	1618.52	0.08294	0	0	4.99294	0.032517
UCHL5_HUMAN	149	162	FEFDTKTSAKEEDA	13	1617.73	UCH37C88A_DEUBAD	1	1625.56	0.142193	7.03816	0.164614	4.99514	0.024097
UCHL5_HUMAN	149	162	FEFDTKTSAKEEDA	13	1617.73	UCH37C88A_DEUBAD	10	1625.22	0.171149	6.69777	0.190187	4.99827	0.022613
UCHL5_HUMAN	149	162	FEFDTKTSAKEEDA	13	1617.73	UCH37C88A_DEUBAD	30	1625.36	0.085279	6.83726	0.11896	4.99353	0.014599
UCHL5_HUMAN	149	162	FEFDTKTSAKEEDA	13	1617.73	UCH37C88A_DEUBAD	60	1625.41	0.039161	6.88729	0.09172	4.99629	0.017649
UCHL5_HUMAN	149	162	FEFDTKTSAKEEDA	13	1617.73	UCH37C88A_DEUBAD	120	1625.28	0.009337	6.76481	0.083464	4.98704	0.000197
UCHL5_HUMAN	149	162	FEFDTKTSAKEEDA	13	1617.73	UCH37C88A_DEUBAD_K48 Ub2	0	1618.52	0.08294	0	0	4.99294	0.032517
UCHL5_HUMAN	149	162	FEFDTKTSAKEEDA	13	1617.73	UCH37C88A_DEUBAD_K48 Ub2	1	1625.2	0.348461	6.67604	0.358196	4.97666	0.024841
UCHL5_HUMAN	149	162	FEFDTKTSAKEEDA	13	1617.73	UCH37C88A_DEUBAD_K48 Ub2	10	1624.95	0.243321	6.43484	0.257068	4.97233	0.022221
UCHL5_HUMAN	149	162	FEFDTKTSAKEEDA	13	1617.73	UCH37C88A_DEUBAD_K48 Ub2	30	1625.14	0.274187	6.62383	0.286457	4.97109	0.03098
UCHL5_HUMAN	149	162	FEFDTKTSAKEEDA	13	1617.73	UCH37C88A_DEUBAD_K48 Ub2	60	1625.07	0.281109	6.55311	0.29309	4.9707	0.024109
UCHL5_HUMAN	149	162	FEFDTKTSAKEEDA	13	1617.73	UCH37C88A_DEUBAD_K48 Ub2	120	1624.97	0.218079	6.44598	0.233318	4.95929	0.019118
UCHL5_HUMAN	149	162	FEFDTKTSAKEEDA	13	1617.73	UCH37C88A_DEUBAD_K48 Ub3	0	1618.52	0.08294	0	0	4.99294	0.032517
UCHL5_HUMAN	149	162	FEFDTKTSAKEEDA	13	1617.73	UCH37C88A_DEUBAD_K48 Ub3	1	1625.27	0.223952	6.74841	0.238817	4.97856	0.027768
UCHL5_HUMAN	149	162	FEFDTKTSAKEEDA	13	1617.73	UCH37C88A_DEUBAD_K48 Ub3	10	1625	0.302954	6.47891	0.314102	4.97939	0.017104
UCHL5_HUMAN	149	162	FEFDTKTSAKEEDA	13	1617.73	UCH37C88A_DEUBAD_K48 Ub3	30	1625.05	0.198595	6.53198	0.215218	4.9823	0.017759
UCHL5_HUMAN	149	162	FEFDTKTSAKEEDA	13	1617.73	UCH37C88A_DEUBAD_K48 Ub3	60	1625.11	0.184092	6.58549	0.201913	4.9807	0.015596
UCHL5_HUMAN	149	162	FEFDTKTSAKEEDA	13	1617.73	UCH37C88A_DEUBAD_K48 Ub3	120	1625.05	0.350333	6.52794	0.360017	4.96753	0.00994
UCHL5_HUMAN	149	162	FEFDTKTSAKEEDA	13	1617.73	UCH37C88A_DEUBAD_K6/48 Ub3	0	1618.52	0.08294	0	0	4.99294	0.032517
UCHL5_HUMAN	149	162	FEFDTKTSAKEEDA	13	1617.73	UCH37C88A_DEUBAD_K6/48 Ub3	1	1625.34	0.21896	6.81604	0.234142	4.96717	0.018346
UCHL5_HUMAN	149	162	FEFDTKTSAKEEDA	13	1617.73	UCH37C88A_DEUBAD_K6/48 Ub3	10	1625.11	0.229708	6.5861	0.244223	4.96828	0.023356
UCHL5_HUMAN	149	162	FEFDTKTSAKEEDA	13	1617.73	UCH37C88A_DEUBAD_K6/48 Ub3	30	1625.17	0.269235	6.64999	0.281721	4.97301	0.020102
UCHL5_HUMAN	149	162	FEFDTKTSAKEEDA	13	1617.73	UCH37C88A_DEUBAD_K6/48 Ub3	60	1625.25	0.258921	6.72738	0.271881	4.97992	0.020077
UCHL5_HUMAN	149	162	FEFDTKTSAKEEDA	13	1617.73	UCH37C88A_DEUBAD_K6/48 Ub3	120	1625.13	0.025548	6.60831	0.086786	4.96591	0.009282
UCHL5_HUMAN	149	162	FEFDTKTSAKEEDA	13	1617.73	UCH37C88A_DEUBAD_Ub	0	1618.52	0.08294	0	0	4.99294	0.032517
UCHL5_HUMAN	149	162	FEFDTKTSAKEEDA	13	1617.73	UCH37C88A_DEUBAD_Ub	1	1625.24	0	6.71787	0.08294	4.53889	0
UCHL5_HUMAN	149	162	FEFDTKTSAKEEDA	13	1617.73	UCH37C88A_DEUBAD_Ub	10	1625.37	0.098315	6.8464	0.128627	4.99274	0.003503
UCHL5_HUMAN	149	162	FEFDTKTSAKEEDA	13	1617.73	UCH37C88A_DEUBAD_Ub	30	1625.44	0.110149	6.92183	0.137884	4.99673	0.00502
UCHL5_HUMAN	149	162	FEFDTKTSAKEEDA	13	1617.73	UCH37C88A_DEUBAD_Ub	60	1625.44	0.05007	6.91822	0.096881	4.98452	0.001075
UCHL5_HUMAN	149	162	FEFDTKTSAKEEDA	13	1617.73	UCH37C88A_DEUBAD_Ub	120	1624.71	0.185041	6.19196	0.202779	4.88187	0.002692
UCHL5_HUMAN	149	163	FEFDTKTSAKEEDAF	14	1764.8	UCH37C88A_DEUBAD	0	1765.93	0.127774	0	0	6.12855	0.09727
UCHL5_HUMAN	149	163	FEFDTKTSAKEEDAF	14	1764.8	UCH37C88A_DEUBAD	1	1773.34	0.159144	7.4179	0.204091	6.04723	0.033413
UCHL5_HUMAN	149	163	FEFDTKTSAKEEDAF	14	1764.8	UCH37C88A_DEUBAD	10	1773.1	0.058661	7.17783	0.140596	6.09526	0.05951
UCHL5_HUMAN	149	163	FEFDTKTSAKEEDAF	14	1764.8	UCH37C88A_DEUBAD	30	1773.09	0.022772	7.16141	0.129787	6.04026	0.026102
UCHL5_HUMAN	149	163	FEFDTKTSAKEEDAF	14	1764.8	UCH37C88A_DEUBAD	60	1773.14	0.053266	7.21615	0.138432	6.05059	0.021193
UCHL5_HUMAN	149	163	FEFDTKTSAKEEDAF	14	1764.8	UCH37C88A_DEUBAD	120	1773.01	0.022499	7.08515	0.12974	6.04854	0.000178
UCHL5_HUMAN	149	163	FEFDTKTSAKEEDAF	14	1764.8	UCH37C88A_DEUBAD_K48 Ub2	0	1765.93	0.127774	0	0	6.12855	0.09727
UCHL5_HUMAN	149	163	FEFDTKTSAKEEDAF	14	1764.8	UCH37C88A_DEUBAD_K48 Ub2	1	1772.55	0.029029	6.62373	0.13103	6.07583	0.033427
UCHL5_HUMAN	149	163	FEFDTKTSAKEEDAF	14	1764.8	UCH37C88A_DEUBAD_K48 Ub2	10	1772.6	0.134861	6.67193	0.185779	6.05384	0.030418
UCHL5_HUMAN	149	163	FEFDTKTSAKEEDAF	14	1764.8	UCH37C88A_DEUBAD_K48 Ub2	30	1772.82	0.182455	6.89751	0.222747	6.06134	0.044913
UCHL5_HUMAN	149	163	FEFDTKTSAKEEDAF	14	1764.8	UCH37C88A_DEUBAD_K48 Ub2	60	1772.85	0.133027	6.92789	0.184452	6.03856	0.028922
UCHL5_HUMAN	149	163	FEFDTKTSAKEEDAF	14	1764.8	UCH37C88A_DEUBAD_K48 Ub2	120	1772.78	0.221667	6.85693	0.255857	6.0408	0.031402
UCHL5_HUMAN	149	163	FEFDTKTSAKEEDAF	14	1764.8	UCH37C88A_DEUBAD_K48 Ub3	0	1765.93	0.127774	0	0	6.12855	0.09727
UCHL5_HUMAN	149	163	FEFDTKTSAKEEDAF	14	1764.8	UCH37C88A_DEUBAD_K48 Ub3	1	1772.23	0.162093	6.30674	0.206398	6.02896	0.020164
UCHL5_HUMAN	149	163	FEFDTKTSAKEEDAF	14	1764.8	UCH37C88A_DEUBAD_K48 Ub3	10	1772.39	0.291375	6.46762	0.31816	6.04043	0.012588
UCHL5_HUMAN	149	163	FEFDTKTSAKEEDAF	14	1764.8	UCH37C88A_DEUBAD_K48 Ub3	30	1772.54	0.078226	6.61941	0.149818	6.04519	0.009394
UCHL5_HUMAN	149	163	FEFDTKTSAKEEDAF	14	1764.8	UCH37C88A_DEUBAD_K48 Ub3	60	1772.83	0.199404	6.90256	0.23683	6.04569	0.015173
UCHL5_HUMAN	149	163	FEFDTKTSAKEEDAF	14	1764.8	UCH37C88A_DEUBAD_K48 Ub3	120	1772.72	0.255852	6.79682	0.285983	6.04383	0.034212
UCHL5_HUMAN	149	163	FEFDTKTSAKEEDAF	14	1764.8	UCH37C88A_DEUBAD_K6/48 Ub3	0	1765.93	0.127774	0	0	6.12855	0.09727
UCHL5_HUMAN	149	163	FEFDTKTSAKEEDAF	14	1764.8	UCH37C88A_DEUBAD_K6/48 Ub3	1	1772.02	0.194417	6.0948	0.232646	6.04148	0.013227
UCHL5_HUMAN	149	163	FEFDTKTSAKEEDAF	14	1764.8	UCH37C88A_DEUBAD_K6/48 Ub3	10	1772.5	0.174822	6.57074	0.216539	6.02326	0.017198
UCHL5_HUMAN	149	163	FEFDTKTSAKEEDAF	14	1764.8	UCH37C88A_DEUBAD_K6/48 Ub3	30	1772.88	0.205775	6.95097	0.242218	6.041	0.030558
UCHL5_HUMAN	149	163	FEFDTKTSAKEEDAF	14	1764.8	UCH37C88A_DEUBAD_K6/48 Ub3	60	1772.89	0.215911	6.96396	0.250886	6.04922	0.050437
UCHL5_HUMAN	149	163	FEFDTKTSAKEEDAF	14	1764.8	UCH37C88A_DEUBAD_K6/48 Ub3	120	1772.62	0.081614	6.69973	0.151615	6.02975	0.041733
UCHL5_HUMAN	149	163	FEFDTKTSAKEEDAF	14	1764.8	UCH37C88A_DEUBAD_Ub	0	1765.93	0.127774	0	0	6.12855	0.09727
UCHL5_HUMAN	149	163	FEFDTKTSAKEEDAF	14	1764.8	UCH37C88A_DEUBAD_Ub	1	1772.3	0.344774	6.37303	0.367689	6.3345	0.009809
UCHL5_HUMAN	149	163	FEFDTKTSAKEEDAF	14	1764.8	UCH37C88A_DEUBAD_Ub	10	1772.55	0.329742	6.62217	0.353633	5.94198	0.001985
UCHL5_HUMAN	149	163	FEFDTKTSAKEEDAF	14	1764.8	UCH37C88A_DEUBAD_Ub	30	1772.61	0.318492	6.68188	0.343167	5.9442	0.001273
UCHL5_HUMAN	149	163	FEFDTKTSAKEEDAF	14	1764.8	UCH37C88A_DEUBAD_Ub	60	1772.48	0.000866	6.55687	0.127777	6.19403	0.007351
UCHL5_HUMAN	149	163	FEFDTKTSAKEEDAF	14	1764.8	UCH37C88A_DEUBAD_Ub	120	1772.54	0	6.61113	0.127774	6.19112	0
UCHL5_HUMAN	150	163	EFDTKTSAKEEDAF	13	1617.73	UCH37C88A_DEUBAD	0	1618.57	0.035562	0	0	5.21489	0.042072
UCHL5_HUMAN	150	163	EFDTKTSAKEEDAF	13	1617.73	UCH37C88A_DEUBAD	1	1625.55	0.106923	6.97821	0.112682	5.21568	0.028593
UCHL5_HUMAN	150	163	EFDTKTSAKEEDAF	13	1617.73	UCH37C88A_DEUBAD	10	1625.33	0.157107	6.76339	0.161082	5.21659	0.027143
UCHL5_HUMAN	150	163	EFDTKTSAKEEDAF	13	1617.73	UCH37C88A_DEUBAD	30	1625.36	0.060589	6.78896	0.070255	5.21397	0.018534
UCHL5_HUMAN	150	163	EFDTKTSAKEEDAF	13	1617.73	UCH37C88A_DEUBAD	60	1625.41	0.078539	6.83945	0.086215	5.2197	0.017925
UCHL5_HUMAN	150	163	EFDTKTSAKEEDAF	13	1617.73	UCH37C88A_DEUBAD	120	1625.25	0.034243	6.68061	0.049369	5.20971	0.000942
UCHL5_HUMAN	150	163	EFDTKTSAKEEDAF	13	1617.73	UCH37C88A_DEUBAD_K48 Ub2	0	1618.57	0.035562	0	0	5.21489	0.042072
UCHL5_HUMAN	150	163	EFDTKTSAKEEDAF	13	1617.73	UCH37C88A_DEUBAD_K48 Ub2	1	1624.58	0.142962	6.00498	0.147318	5.19125	0.025871
UCHL5_HUMAN	150	163	EFDTKTSAKEEDAF	13	1617.73	UCH37C88A_DEUBAD_K48 Ub2	10	1624.87	0.146728	6.30209	0.150976	5.21477	0.016663
UCHL5_HUMAN	150	163	EFDTKTSAKEEDAF	13	1617.73	UCH37C88A_DEUBAD_K48 Ub2	30	1625.15	0.104145	6.5792	0.110049	5.22285	0.014022
UCHL5_HUMAN	150	163	EFDTKTSAKEEDAF	13	1617.73	UCH37C88A_DEUBAD_K48 Ub2	60	1625.14	0.122714	6.57281	0.127763	5.21709	0.01613
UCHL5_HUMAN	150	163	EFDTKTSAKEEDAF	13	1617.73	UCH37C88A_DEUBAD_K48 Ub2	120	1624.95	0.175783	6.37936	0.179344	5.1835	0.022521
UCHL5_HUMAN	150	163	EFDTKTSAKEEDAF	13	1617.73	UCH37C88A_DEUBAD_K48 Ub3	0	1618.57	0.035562	0	0	5.21489	0.042072
UCHL5_HUMAN	150	163	EFDTKTSAKEEDAF	13	1617.73	UCH37C88A_DEUBAD_K48 Ub3	1	1624.68	0.324008	6.10796	0.325953	5.20012	0.029465
UCHL5_HUMAN	150	163	EFDTKTSAKEEDAF	13	1617.73	UCH37C88A_DEUBAD_K48 Ub3	10	1624.81	0.338902	6.24109	0.340762	5.20527	0.018564
UCHL5_HUMAN	150	163	EFDTKTSAKEEDAF	13	1617.73	UCH37C88A_DEUBAD_K48 Ub3	30	1624.97	0.1873	6.395	0.190646	5.20581	0.018565
UCHL5_HUMAN	150	163	EFDTKTSAKEEDAF	13	1617.73	UCH37C88A_DEUBAD_K48 Ub3	60	1625.09	0.227301	6.51618	0.230066	5.20274	0.018049
UCHL5_HUMAN	150	163	EFDTKTSAKEEDAF	13	1617.73	UCH37C88A_DEUBAD_K48 Ub3	120	1624.97	0.173457	6.40138	0.177065	5.18942	0.011316
UCHL5_HUMAN	150	163	EFDTKTSAKEEDAF	13	1617.73	UCH37C88A_DEUBAD_K6/48 Ub3	0	1618.57	0.035562	0	0	5.21489	0.042072
UCHL5_HUMAN	150	163	EFDTKTSAKEEDAF	13	1617.73	UCH37C88A_DEUBAD_K6/48 Ub3	1	1624.9	0.42491	6.32852	0.426395	5.21183	0.018378
UCHL5_HUMAN	150	163	EFDTKTSAKEEDAF	13	1617.73	UCH37C88A_DEUBAD_K6/48 Ub3	10	1624.89	0.28007	6.32182	0.282318	5.19837	0.025752
UCHL5_HUMAN	150	163	EFDTKTSAKEEDAF	13	1617.73	UCH37C88A_DEUBAD_K6/48 Ub3	30	1625.12	0.184564	6.54921	0.187959	5.19294	0.022776
UCHL5_HUMAN	150	163	EFDTKTSAKEEDAF	13	1617.73	UCH37C88A_DEUBAD_K6/48 Ub3	60	1625.18	0.185292	6.61418	0.188674	5.20355	0.029526
UCHL5_HUMAN	150	163	EFDTKTSAKEEDAF	13	1617.73	UCH37C88A_DEUBAD_K6/48 Ub3	120	1625	0.115692	6.42429	0.121034	5.18877	0.009899
UCHL5_HUMAN	150	163	EFDTKTSAKEEDAF	13	1617.73	UCH37C88A_DEUBAD_Ub	0	1618.57	0.035562	0	0	5.21489	0.042072
UCHL5_HUMAN	150	163	EFDTKTSAKEEDAF	13	1617.73	UCH37C88A_DEUBAD_Ub	1	1624.66	0.312383	6.08771	0.314401	5.13681	0.059442
UCHL5_HUMAN	150	163	EFDTKTSAKEEDAF	13	1617.73	UCH37C88A_DEUBAD_Ub	10	1624.62	0.458732	6.04692	0.460109	5.13018	0.070344
UCHL5_HUMAN	150	163	EFDTKTSAKEEDAF	13	1617.73	UCH37C88A_DEUBAD_Ub	30	1624.91	0.388761	6.3421	0.390385	5.1322	0.07152
UCHL5_HUMAN	150	163	EFDTKTSAKEEDAF	13	1617.73	UCH37C88A_DEUBAD_Ub	60	1625.05	0.183173	6.47789	0.186594	5.13703	0.066741
UCHL5_HUMAN	150	163	EFDTKTSAKEEDAF	13	1617.73	UCH37C88A_DEUBAD_Ub	120	1624.74	0.08497	6.17372	0.092111	5.08223	0.004884
UCHL5_HUMAN	151	163	FDTKTSAKEEDAF	12	1488.69	UCH37C88A_DEUBAD	0	1489.69	0.286668	0	0	5.00258	0.11131
UCHL5_HUMAN	151	163	FDTKTSAKEEDAF	12	1488.69	UCH37C88A_DEUBAD	1	1496.23	0.149167	6.53933	0.323155	4.99527	0.026498
UCHL5_HUMAN	151	163	FDTKTSAKEEDAF	12	1488.69	UCH37C88A_DEUBAD	10	1495.94	0.177001	6.24575	0.336909	4.99497	0.021496
UCHL5_HUMAN	151	163	FDTKTSAKEEDAF	12	1488.69	UCH37C88A_DEUBAD	30	1495.99	0.118827	6.29803	0.310319	4.99493	0.015433
UCHL5_HUMAN	151	163	FDTKTSAKEEDAF	12	1488.69	UCH37C88A_DEUBAD	60	1496.11	0.06368	6.41948	0.293655	4.99179	0.018028
UCHL5_HUMAN	151	163	FDTKTSAKEEDAF	12	1488.69	UCH37C88A_DEUBAD	120	1495.97	0.01569	6.28113	0.287097	4.98077	0.001936
UCHL5_HUMAN	151	163	FDTKTSAKEEDAF	12	1488.69	UCH37C88A_DEUBAD_K48 Ub2	0	1489.69	0.286668	0	0	5.00258	0.11131
UCHL5_HUMAN	151	163	FDTKTSAKEEDAF	12	1488.69	UCH37C88A_DEUBAD_K48 Ub2	1	1495.35	0.198075	5.66059	0.348442	4.97318	0.024682
UCHL5_HUMAN	151	163	FDTKTSAKEEDAF	12	1488.69	UCH37C88A_DEUBAD_K48 Ub2	10	1495.45	0.231269	5.75903	0.368326	4.96906	0.021511
UCHL5_HUMAN	151	163	FDTKTSAKEEDAF	12	1488.69	UCH37C88A_DEUBAD_K48 Ub2	30	1495.75	0.179149	6.05799	0.338043	4.96343	0.035983
UCHL5_HUMAN	151	163	FDTKTSAKEEDAF	12	1488.69	UCH37C88A_DEUBAD_K48 Ub2	60	1495.75	0.220524	6.06442	0.361675	4.9662	0.025258
UCHL5_HUMAN	151	163	FDTKTSAKEEDAF	12	1488.69	UCH37C88A_DEUBAD_K48 Ub2	120	1495.6	0.221389	5.90953	0.362204	4.94777	0.024001
UCHL5_HUMAN	151	163	FDTKTSAKEEDAF	12	1488.69	UCH37C88A_DEUBAD_K48 Ub3	0	1489.69	0.286668	0	0	5.00258	0.11131
UCHL5_HUMAN	151	163	FDTKTSAKEEDAF	12	1488.69	UCH37C88A_DEUBAD_K48 Ub3	1	1495.36	0.310885	5.67403	0.42288	4.97183	0.025537
UCHL5_HUMAN	151	163	FDTKTSAKEEDAF	12	1488.69	UCH37C88A_DEUBAD_K48 Ub3	10	1495.48	0.3063	5.78989	0.419521	4.97201	0.018808
UCHL5_HUMAN	151	163	FDTKTSAKEEDAF	12	1488.69	UCH37C88A_DEUBAD_K48 Ub3	30	1495.64	0.146173	5.94521	0.321784	4.97334	0.018048
UCHL5_HUMAN	151	163	FDTKTSAKEEDAF	12	1488.69	UCH37C88A_DEUBAD_K48 Ub3	60	1495.78	0.198178	6.08911	0.348501	4.97198	0.014951
UCHL5_HUMAN	151	163	FDTKTSAKEEDAF	12	1488.69	UCH37C88A_DEUBAD_K48 Ub3	120	1495.66	0.145136	5.96793	0.321314	4.96127	0.005736
UCHL5_HUMAN	151	163	FDTKTSAKEEDAF	12	1488.69	UCH37C88A_DEUBAD_K6/48 Ub3	0	1489.69	0.286668	0	0	5.00258	0.11131
[truncated: 1,960 more rows]

## Sheet: UCH37-DEUBAD-Ub PG
Protein	Start	End	Sequence	MaxUptake	MHP	State	Exposure Time (min)	Center	Center SD	Uptake	Uptake SD	RT	RT SD
UCHL5_HUMAN	11	18	MESDPGVF	6	881.371	UCH37_DEUBAD UbPG plus K6/48 Ub3	0	882.196	0.002797	0	0	6.20282	0.018429
UCHL5_HUMAN	11	18	MESDPGVF	6	881.371	UCH37_DEUBAD UbPG plus K6/48 Ub3	1	882.517	0.089429	0.321542	0.089473	6.14065	0.009965
UCHL5_HUMAN	11	18	MESDPGVF	6	881.371	UCH37_DEUBAD UbPG plus K6/48 Ub3	10	882.47	0.015352	0.274507	0.015605	6.13362	0.001892
UCHL5_HUMAN	11	18	MESDPGVF	6	881.371	UCH37_DEUBAD UbPG plus K6/48 Ub3	30	882.505	0.016973	0.309284	0.017201	6.13505	0.002964
UCHL5_HUMAN	11	18	MESDPGVF	6	881.371	UCH37_DEUBAD UbPG plus K6/48 Ub3	60	882.529	0.009285	0.333479	0.009698	6.13468	0.002344
UCHL5_HUMAN	11	18	MESDPGVF	6	881.371	UCH37_DEUBAD UbPG plus K6/48 Ub3	120	882.567	0.015023	0.371804	0.015281	6.13793	0.001835
UCHL5_HUMAN	11	18	MESDPGVF	6	881.371	UCH37_DEUBAD UbPG plus Ub	0	882.19	0.046201	0	0	6.20289	0.018448
UCHL5_HUMAN	11	18	MESDPGVF	6	881.371	UCH37_DEUBAD UbPG plus Ub	1	882.432	0.037908	0.242052	0.059763	6.18988	0.010062
UCHL5_HUMAN	11	18	MESDPGVF	6	881.371	UCH37_DEUBAD UbPG plus Ub	10	882.511	0.059805	0.320978	0.075573	6.18997	0.002608
UCHL5_HUMAN	11	18	MESDPGVF	6	881.371	UCH37_DEUBAD UbPG plus Ub	30	882.486	0.024616	0.296077	0.05235	6.18658	0.004226
UCHL5_HUMAN	11	18	MESDPGVF	6	881.371	UCH37_DEUBAD UbPG plus Ub	60	882.536	0.031308	0.34526	0.05581	6.18737	0.001959
UCHL5_HUMAN	11	18	MESDPGVF	6	881.371	UCH37_DEUBAD UbPG plus Ub	120	882.57	0.041623	0.379314	0.062186	6.18556	0.003488
UCHL5_HUMAN	11	18	MESDPGVF	6	881.371	UCH37_DEUBAD_UbPG	0	882.196	0.002797	0	0	6.20282	0.018429
UCHL5_HUMAN	11	18	MESDPGVF	6	881.371	UCH37_DEUBAD_UbPG	1	882.471	0.011021	0.275037	0.01137	6.19664	0.018161
UCHL5_HUMAN	11	18	MESDPGVF	6	881.371	UCH37_DEUBAD_UbPG	10	882.534	0.015569	0.338268	0.015818	6.19581	0.014332
UCHL5_HUMAN	11	18	MESDPGVF	6	881.371	UCH37_DEUBAD_UbPG	30	882.523	0.033329	0.327913	0.033446	6.19403	0.014534
UCHL5_HUMAN	11	18	MESDPGVF	6	881.371	UCH37_DEUBAD_UbPG	60	882.559	0.017719	0.363565	0.017938	6.19442	0.018123
UCHL5_HUMAN	11	18	MESDPGVF	6	881.371	UCH37_DEUBAD_UbPG	120	882.594	0.023881	0.398347	0.024044	6.19466	0.018964
UCHL5_HUMAN	11	18	MESDPGVF	6	881.371	UCH37_DEUBAD_UbPG plus K48 Ub2	0	882.19	0.046201	0	0	6.20289	0.018448
UCHL5_HUMAN	11	18	MESDPGVF	6	881.371	UCH37_DEUBAD_UbPG plus K48 Ub2	1	882.589	0.126207	0.398821	0.134398	6.20916	0.012947
UCHL5_HUMAN	11	18	MESDPGVF	6	881.371	UCH37_DEUBAD_UbPG plus K48 Ub2	10	882.593	0.084425	0.402532	0.09624	6.19912	0.016049
UCHL5_HUMAN	11	18	MESDPGVF	6	881.371	UCH37_DEUBAD_UbPG plus K48 Ub2	30	882.564	0.05845	0.374	0.074505	6.19837	0.010071
UCHL5_HUMAN	11	18	MESDPGVF	6	881.371	UCH37_DEUBAD_UbPG plus K48 Ub2	60	882.604	0.064941	0.413831	0.079699	6.1963	0.012101
UCHL5_HUMAN	11	18	MESDPGVF	6	881.371	UCH37_DEUBAD_UbPG plus K48 Ub2	120	882.65	0.081083	0.459643	0.093323	6.1971	0.014353
UCHL5_HUMAN	12	18	ESDPGVF	5	750.331	UCH37_DEUBAD UbPG plus K6/48 Ub3	0	750.766	0.02083	0	0	5.84625	0.01244
UCHL5_HUMAN	12	18	ESDPGVF	5	750.331	UCH37_DEUBAD UbPG plus K6/48 Ub3	1	750.983	0.009864	0.216666	0.023047	5.79096	0.005442
UCHL5_HUMAN	12	18	ESDPGVF	5	750.331	UCH37_DEUBAD UbPG plus K6/48 Ub3	10	751.017	0.003841	0.250867	0.021181	5.78792	0.003
UCHL5_HUMAN	12	18	ESDPGVF	5	750.331	UCH37_DEUBAD UbPG plus K6/48 Ub3	30	751.024	0.007481	0.25758	0.022132	5.78959	0.002494
UCHL5_HUMAN	12	18	ESDPGVF	5	750.331	UCH37_DEUBAD UbPG plus K6/48 Ub3	60	751.039	0.005111	0.272488	0.021448	5.78967	0.00335
UCHL5_HUMAN	12	18	ESDPGVF	5	750.331	UCH37_DEUBAD UbPG plus K6/48 Ub3	120	751.099	0.015478	0.333294	0.025951	5.79243	0.001314
UCHL5_HUMAN	12	18	ESDPGVF	5	750.331	UCH37_DEUBAD UbPG plus Ub	0	750.766	0.02083	0	0	5.84625	0.01244
UCHL5_HUMAN	12	18	ESDPGVF	5	750.331	UCH37_DEUBAD UbPG plus Ub	1	750.96	0.004962	0.194042	0.021413	5.83815	0.008134
UCHL5_HUMAN	12	18	ESDPGVF	5	750.331	UCH37_DEUBAD UbPG plus Ub	10	751.009	0.020527	0.243012	0.029244	5.83638	0.003242
UCHL5_HUMAN	12	18	ESDPGVF	5	750.331	UCH37_DEUBAD UbPG plus Ub	30	750.986	0.012628	0.220129	0.024358	5.83502	0.00235
UCHL5_HUMAN	12	18	ESDPGVF	5	750.331	UCH37_DEUBAD UbPG plus Ub	60	751.06	0.011869	0.29349	0.023974	5.83647	0.002352
UCHL5_HUMAN	12	18	ESDPGVF	5	750.331	UCH37_DEUBAD UbPG plus Ub	120	751.095	0.021188	0.3293	0.029712	5.83528	0.003171
UCHL5_HUMAN	12	18	ESDPGVF	5	750.331	UCH37_DEUBAD_UbPG	0	750.766	0.02083	0	0	5.84625	0.01244
UCHL5_HUMAN	12	18	ESDPGVF	5	750.331	UCH37_DEUBAD_UbPG	1	751.001	0.016214	0.23493	0.026396	5.84233	0.009388
UCHL5_HUMAN	12	18	ESDPGVF	5	750.331	UCH37_DEUBAD_UbPG	10	750.994	0.000347	0.22779	0.020833	5.84065	0.007772
UCHL5_HUMAN	12	18	ESDPGVF	5	750.331	UCH37_DEUBAD_UbPG	30	751.036	0.001243	0.269544	0.020867	5.83872	0.009156
UCHL5_HUMAN	12	18	ESDPGVF	5	750.331	UCH37_DEUBAD_UbPG	60	751.061	0.009844	0.294737	0.023039	5.84037	0.009902
UCHL5_HUMAN	12	18	ESDPGVF	5	750.331	UCH37_DEUBAD_UbPG	120	751.107	0.00157	0.340959	0.020889	5.84195	0.011935
UCHL5_HUMAN	12	18	ESDPGVF	5	750.331	UCH37_DEUBAD_UbPG plus K48 Ub2	0	750.766	0.02083	0	0	5.84625	0.01244
UCHL5_HUMAN	12	18	ESDPGVF	5	750.331	UCH37_DEUBAD_UbPG plus K48 Ub2	1	751.087	0.078088	0.320674	0.080818	5.84976	0.009209
UCHL5_HUMAN	12	18	ESDPGVF	5	750.331	UCH37_DEUBAD_UbPG plus K48 Ub2	10	751.16	0.091583	0.393779	0.093922	5.84217	0.010391
UCHL5_HUMAN	12	18	ESDPGVF	5	750.331	UCH37_DEUBAD_UbPG plus K48 Ub2	30	751.087	0.039305	0.321013	0.044484	5.83976	0.005715
UCHL5_HUMAN	12	18	ESDPGVF	5	750.331	UCH37_DEUBAD_UbPG plus K48 Ub2	60	751.127	0.053741	0.360815	0.057636	5.83845	0.007055
UCHL5_HUMAN	12	18	ESDPGVF	5	750.331	UCH37_DEUBAD_UbPG plus K48 Ub2	120	751.149	0.040111	0.382905	0.045197	5.83969	0.009177
UCHL5_HUMAN	19	31	TELIKGFGCRGAQ	12	1379.71	UCH37_DEUBAD UbPG plus K6/48 Ub3	0	1380.93	0.244536	0	0	5.36561	0.025639
UCHL5_HUMAN	19	31	TELIKGFGCRGAQ	12	1379.71	UCH37_DEUBAD UbPG plus K6/48 Ub3	1	1382.16	0.139083	1.23005	0.281321	5.28137	0.006952
UCHL5_HUMAN	19	31	TELIKGFGCRGAQ	12	1379.71	UCH37_DEUBAD UbPG plus K6/48 Ub3	10	1382.63	0.101522	1.6978	0.264772	5.27712	0.002408
UCHL5_HUMAN	19	31	TELIKGFGCRGAQ	12	1379.71	UCH37_DEUBAD UbPG plus K6/48 Ub3	30	1383.1	0.101655	2.16964	0.264823	5.28094	0.002576
UCHL5_HUMAN	19	31	TELIKGFGCRGAQ	12	1379.71	UCH37_DEUBAD UbPG plus K6/48 Ub3	60	1383.32	0.094333	2.38897	0.2621	5.28151	0.002781
UCHL5_HUMAN	19	31	TELIKGFGCRGAQ	12	1379.71	UCH37_DEUBAD UbPG plus K6/48 Ub3	120	1383.41	0.070212	2.47367	0.254416	5.2829	0.001506
UCHL5_HUMAN	19	31	TELIKGFGCRGAQ	12	1379.71	UCH37_DEUBAD UbPG plus Ub	0	1380.93	0.244536	0	0	5.36561	0.025639
UCHL5_HUMAN	19	31	TELIKGFGCRGAQ	12	1379.71	UCH37_DEUBAD UbPG plus Ub	1	1382.05	0.08262	1.11625	0.258116	5.34913	0.000854
UCHL5_HUMAN	19	31	TELIKGFGCRGAQ	12	1379.71	UCH37_DEUBAD UbPG plus Ub	10	1382.64	0.12063	1.71008	0.27267	5.34175	0.001424
UCHL5_HUMAN	19	31	TELIKGFGCRGAQ	12	1379.71	UCH37_DEUBAD UbPG plus Ub	30	1382.9	0.061901	1.96452	0.252249	5.34139	0.005418
UCHL5_HUMAN	19	31	TELIKGFGCRGAQ	12	1379.71	UCH37_DEUBAD UbPG plus Ub	60	1383.34	0.105423	2.40698	0.266293	5.33895	0.003096
UCHL5_HUMAN	19	31	TELIKGFGCRGAQ	12	1379.71	UCH37_DEUBAD UbPG plus Ub	120	1383.4	0.110761	2.46743	0.26845	5.33607	0.002416
UCHL5_HUMAN	19	31	TELIKGFGCRGAQ	12	1379.71	UCH37_DEUBAD_UbPG	0	1380.87	0.110893	0	0	5.3665	0.025209
UCHL5_HUMAN	19	31	TELIKGFGCRGAQ	12	1379.71	UCH37_DEUBAD_UbPG	1	1382.09	0.050577	1.2229	0.121882	5.35924	0.024924
UCHL5_HUMAN	19	31	TELIKGFGCRGAQ	12	1379.71	UCH37_DEUBAD_UbPG	10	1382.52	0.047873	1.65129	0.120785	5.35797	0.023853
UCHL5_HUMAN	19	31	TELIKGFGCRGAQ	12	1379.71	UCH37_DEUBAD_UbPG	30	1383	0.135095	2.12555	0.17478	5.36402	0.022962
UCHL5_HUMAN	19	31	TELIKGFGCRGAQ	12	1379.71	UCH37_DEUBAD_UbPG	60	1383.19	0.056931	2.31583	0.124653	5.35793	0.025102
UCHL5_HUMAN	19	31	TELIKGFGCRGAQ	12	1379.71	UCH37_DEUBAD_UbPG	120	1383.39	0.056259	2.52147	0.124347	5.35713	0.027155
UCHL5_HUMAN	19	31	TELIKGFGCRGAQ	12	1379.71	UCH37_DEUBAD_UbPG plus K48 Ub2	0	1380.87	0.110893	0	0	5.3665	0.025209
UCHL5_HUMAN	19	31	TELIKGFGCRGAQ	12	1379.71	UCH37_DEUBAD_UbPG plus K48 Ub2	1	1382.41	0.216135	1.54448	0.242923	5.37273	0.021346
UCHL5_HUMAN	19	31	TELIKGFGCRGAQ	12	1379.71	UCH37_DEUBAD_UbPG plus K48 Ub2	10	1382.74	0.170208	1.8708	0.203145	5.36334	0.024796
UCHL5_HUMAN	19	31	TELIKGFGCRGAQ	12	1379.71	UCH37_DEUBAD_UbPG plus K48 Ub2	30	1383.31	0.31943	2.43738	0.338131	5.36353	0.017194
UCHL5_HUMAN	19	31	TELIKGFGCRGAQ	12	1379.71	UCH37_DEUBAD_UbPG plus K48 Ub2	60	1383.54	0.2098	2.66818	0.237304	5.3608	0.018647
UCHL5_HUMAN	19	31	TELIKGFGCRGAQ	12	1379.71	UCH37_DEUBAD_UbPG plus K48 Ub2	120	1383.44	0.21671	2.56953	0.243434	5.36045	0.020486
UCHL5_HUMAN	20	31	ELIKGFGCRGAQ	11	1278.66	UCH37_DEUBAD UbPG plus K6/48 Ub3	0	1279.42	0.03648	0	0	5.36041	0.024067
UCHL5_HUMAN	20	31	ELIKGFGCRGAQ	11	1278.66	UCH37_DEUBAD UbPG plus K6/48 Ub3	1	1280.73	0	1.31414	0.03648	5.27773	0
UCHL5_HUMAN	20	31	ELIKGFGCRGAQ	11	1278.66	UCH37_DEUBAD UbPG plus K6/48 Ub3	10	1281.12	0.004387	1.7031	0.036743	5.27411	8.62811e-05
UCHL5_HUMAN	20	31	ELIKGFGCRGAQ	11	1278.66	UCH37_DEUBAD UbPG plus K6/48 Ub3	30	1281.73	0	2.31545	0.03648	5.27745	0
UCHL5_HUMAN	20	31	ELIKGFGCRGAQ	11	1278.66	UCH37_DEUBAD UbPG plus K6/48 Ub3	60	1281.9	0	2.48174	0.03648	5.27518	0
UCHL5_HUMAN	20	31	ELIKGFGCRGAQ	11	1278.66	UCH37_DEUBAD UbPG plus K6/48 Ub3	120	1281.99	0.011523	2.5756	0.038257	5.27966	0.001603
UCHL5_HUMAN	20	31	ELIKGFGCRGAQ	11	1278.66	UCH37_DEUBAD UbPG plus Ub	0	1279.4	0.092123	0	0	5.35335	0.035953
UCHL5_HUMAN	20	31	ELIKGFGCRGAQ	11	1278.66	UCH37_DEUBAD UbPG plus Ub	1	1280.7	0.029687	1.30547	0.096788	5.32335	0.031481
UCHL5_HUMAN	20	31	ELIKGFGCRGAQ	11	1278.66	UCH37_DEUBAD UbPG plus Ub	10	1281.21	0.129498	1.80924	0.158922	5.33924	0.015857
UCHL5_HUMAN	20	31	ELIKGFGCRGAQ	11	1278.66	UCH37_DEUBAD UbPG plus Ub	30	1281.6	0.138159	2.20398	0.166056	5.33573	0.028092
UCHL5_HUMAN	20	31	ELIKGFGCRGAQ	11	1278.66	UCH37_DEUBAD UbPG plus Ub	60	1281.92	0.017382	2.51768	0.093748	5.33637	0.002835
UCHL5_HUMAN	20	31	ELIKGFGCRGAQ	11	1278.66	UCH37_DEUBAD UbPG plus Ub	120	1281.96	0.002779	2.56147	0.092165	5.33493	0.002593
UCHL5_HUMAN	20	31	ELIKGFGCRGAQ	11	1278.66	UCH37_DEUBAD_UbPG	0	1279.4	0.092123	0	0	5.35335	0.035953
UCHL5_HUMAN	20	31	ELIKGFGCRGAQ	11	1278.66	UCH37_DEUBAD_UbPG	1	1280.83	0.137132	1.43173	0.165203	5.3484	0.0274
UCHL5_HUMAN	20	31	ELIKGFGCRGAQ	11	1278.66	UCH37_DEUBAD_UbPG	10	1281.6	0.191756	2.20415	0.212737	5.33069	0.040103
UCHL5_HUMAN	20	31	ELIKGFGCRGAQ	11	1278.66	UCH37_DEUBAD_UbPG	30	1281.87	0.056822	2.47348	0.108237	5.34591	0.027366
UCHL5_HUMAN	20	31	ELIKGFGCRGAQ	11	1278.66	UCH37_DEUBAD_UbPG	60	1281.91	0.086273	2.5125	0.126212	5.34902	0.02583
UCHL5_HUMAN	20	31	ELIKGFGCRGAQ	11	1278.66	UCH37_DEUBAD_UbPG	120	1282.09	0.043673	2.69713	0.101951	5.34469	0.027764
UCHL5_HUMAN	20	31	ELIKGFGCRGAQ	11	1278.66	UCH37_DEUBAD_UbPG plus K48 Ub2	0	1279.38	0.082906	0	0	5.35316	0.035993
UCHL5_HUMAN	20	31	ELIKGFGCRGAQ	11	1278.66	UCH37_DEUBAD_UbPG plus K48 Ub2	1	1280.86	0.00123	1.48759	0.082915	5.38032	0.001804
UCHL5_HUMAN	20	31	ELIKGFGCRGAQ	11	1278.66	UCH37_DEUBAD_UbPG plus K48 Ub2	10	1281.47	0.15408	2.09112	0.174968	5.24804	0.023464
UCHL5_HUMAN	20	31	ELIKGFGCRGAQ	11	1278.66	UCH37_DEUBAD_UbPG plus K48 Ub2	30	1281.93	0.183977	2.55803	0.201794	5.34321	0.035503
UCHL5_HUMAN	20	31	ELIKGFGCRGAQ	11	1278.66	UCH37_DEUBAD_UbPG plus K48 Ub2	60	1282.18	0.124932	2.80084	0.149938	5.25283	0.017561
UCHL5_HUMAN	20	31	ELIKGFGCRGAQ	11	1278.66	UCH37_DEUBAD_UbPG plus K48 Ub2	120	1282.16	0.123695	2.78332	0.148909	5.2619	0.00488
UCHL5_HUMAN	21	31	LIKGFGCRGAQ	10	1149.62	UCH37_DEUBAD UbPG plus K6/48 Ub3	0	1150.3	0.072067	0	0	4.73138	0.02717
UCHL5_HUMAN	21	31	LIKGFGCRGAQ	10	1149.62	UCH37_DEUBAD UbPG plus K6/48 Ub3	1	1151.73	0.028577	1.42889	0.077526	4.65151	0.006188
UCHL5_HUMAN	21	31	LIKGFGCRGAQ	10	1149.62	UCH37_DEUBAD UbPG plus K6/48 Ub3	10	1152.31	0.029602	2.00561	0.077909	4.6464	0.003243
UCHL5_HUMAN	21	31	LIKGFGCRGAQ	10	1149.62	UCH37_DEUBAD UbPG plus K6/48 Ub3	30	1152.74	0.081423	2.43953	0.108735	5.25877	0.057406
UCHL5_HUMAN	21	31	LIKGFGCRGAQ	10	1149.62	UCH37_DEUBAD UbPG plus K6/48 Ub3	60	1153.09	0.018947	2.78976	0.074516	4.64293	0.002975
UCHL5_HUMAN	21	31	LIKGFGCRGAQ	10	1149.62	UCH37_DEUBAD UbPG plus K6/48 Ub3	120	1153.19	0.053429	2.89055	0.089712	4.64821	0.0018
UCHL5_HUMAN	21	31	LIKGFGCRGAQ	10	1149.62	UCH37_DEUBAD UbPG plus Ub	0	1150.3	0.072067	0	0	4.73138	0.02717
UCHL5_HUMAN	21	31	LIKGFGCRGAQ	10	1149.62	UCH37_DEUBAD UbPG plus Ub	1	1151.8	0.050013	1.50372	0.087721	4.70499	0.009083
UCHL5_HUMAN	21	31	LIKGFGCRGAQ	10	1149.62	UCH37_DEUBAD UbPG plus Ub	10	1152.34	0.061885	2.03994	0.094991	4.70587	0.003296
UCHL5_HUMAN	21	31	LIKGFGCRGAQ	10	1149.62	UCH37_DEUBAD UbPG plus Ub	30	1152.77	0.037882	2.46546	0.081416	4.70148	0.005036
UCHL5_HUMAN	21	31	LIKGFGCRGAQ	10	1149.62	UCH37_DEUBAD UbPG plus Ub	60	1153.13	0.068669	2.83266	0.099544	4.70169	0.004244
UCHL5_HUMAN	21	31	LIKGFGCRGAQ	10	1149.62	UCH37_DEUBAD UbPG plus Ub	120	1153.18	0.068821	2.88314	0.099649	4.69904	0.003652
UCHL5_HUMAN	21	31	LIKGFGCRGAQ	10	1149.62	UCH37_DEUBAD_UbPG	0	1150.3	0.072067	0	0	4.73138	0.02717
UCHL5_HUMAN	21	31	LIKGFGCRGAQ	10	1149.62	UCH37_DEUBAD_UbPG	1	1151.84	0.051427	1.53592	0.088534	4.72262	0.026118
UCHL5_HUMAN	21	31	LIKGFGCRGAQ	10	1149.62	UCH37_DEUBAD_UbPG	10	1152.27	0.032399	1.97263	0.079014	4.72214	0.02465
UCHL5_HUMAN	21	31	LIKGFGCRGAQ	10	1149.62	UCH37_DEUBAD_UbPG	30	1152.92	0.109093	2.61737	0.130747	4.71815	0.025501
UCHL5_HUMAN	21	31	LIKGFGCRGAQ	10	1149.62	UCH37_DEUBAD_UbPG	60	1153.02	0.036877	2.71939	0.080954	4.72059	0.026561
UCHL5_HUMAN	21	31	LIKGFGCRGAQ	10	1149.62	UCH37_DEUBAD_UbPG	120	1153.17	0.01236	2.87083	0.073119	4.72077	0.027777
UCHL5_HUMAN	21	31	LIKGFGCRGAQ	10	1149.62	UCH37_DEUBAD_UbPG plus K48 Ub2	0	1150.3	0.072067	0	0	4.73138	0.02717
UCHL5_HUMAN	21	31	LIKGFGCRGAQ	10	1149.62	UCH37_DEUBAD_UbPG plus K48 Ub2	1	1152.06	0.068746	1.75836	0.099597	4.75319	0.003566
UCHL5_HUMAN	21	31	LIKGFGCRGAQ	10	1149.62	UCH37_DEUBAD_UbPG plus K48 Ub2	10	1152.63	0.247208	2.33182	0.257498	4.72841	0.0249
UCHL5_HUMAN	21	31	LIKGFGCRGAQ	10	1149.62	UCH37_DEUBAD_UbPG plus K48 Ub2	30	1153.05	0.190897	2.74933	0.204047	4.72985	0.018033
UCHL5_HUMAN	21	31	LIKGFGCRGAQ	10	1149.62	UCH37_DEUBAD_UbPG plus K48 Ub2	60	1153.22	0.097919	2.92101	0.12158	4.72645	0.01952
UCHL5_HUMAN	21	31	LIKGFGCRGAQ	10	1149.62	UCH37_DEUBAD_UbPG plus K48 Ub2	120	1153.24	0.130825	2.93987	0.149361	4.72523	0.021685
UCHL5_HUMAN	22	31	IKGFGCRGAQ	9	1036.54	UCH37_DEUBAD UbPG plus K6/48 Ub3	0	1037.46	0.258288	0	0	4.17156	0.028799
UCHL5_HUMAN	22	31	IKGFGCRGAQ	9	1036.54	UCH37_DEUBAD UbPG plus K6/48 Ub3	1	1038.91	0.138185	1.4537	0.29293	4.09617	0.008621
UCHL5_HUMAN	22	31	IKGFGCRGAQ	9	1036.54	UCH37_DEUBAD UbPG plus K6/48 Ub3	10	1039.35	0.094439	1.88431	0.275011	4.08789	0.003621
UCHL5_HUMAN	22	31	IKGFGCRGAQ	9	1036.54	UCH37_DEUBAD UbPG plus K6/48 Ub3	30	1039.86	0.100027	2.39578	0.27698	4.0872	0.003873
UCHL5_HUMAN	22	31	IKGFGCRGAQ	9	1036.54	UCH37_DEUBAD UbPG plus K6/48 Ub3	60	1040.04	0.08003	2.58365	0.270402	4.08779	0.002955
UCHL5_HUMAN	22	31	IKGFGCRGAQ	9	1036.54	UCH37_DEUBAD UbPG plus K6/48 Ub3	120	1040.16	0.095116	2.70002	0.275244	4.08992	0.003101
UCHL5_HUMAN	22	31	IKGFGCRGAQ	9	1036.54	UCH37_DEUBAD UbPG plus Ub	0	1037.46	0.258288	0	0	4.17156	0.028799
UCHL5_HUMAN	22	31	IKGFGCRGAQ	9	1036.54	UCH37_DEUBAD UbPG plus Ub	1	1038.86	0.141717	1.40177	0.294612	4.13788	0.01058
UCHL5_HUMAN	22	31	IKGFGCRGAQ	9	1036.54	UCH37_DEUBAD UbPG plus Ub	10	1039.4	0.137776	1.93595	0.292736	4.13594	0.004465
UCHL5_HUMAN	22	31	IKGFGCRGAQ	9	1036.54	UCH37_DEUBAD UbPG plus Ub	30	1039.73	0.110973	2.26803	0.281118	4.13252	0.005117
UCHL5_HUMAN	22	31	IKGFGCRGAQ	9	1036.54	UCH37_DEUBAD UbPG plus Ub	60	1040.15	0.142432	2.69268	0.294957	4.13341	0.003922
UCHL5_HUMAN	22	31	IKGFGCRGAQ	9	1036.54	UCH37_DEUBAD UbPG plus Ub	120	1040.17	0.124896	2.70715	0.2869	4.13035	0.006365
UCHL5_HUMAN	22	31	IKGFGCRGAQ	9	1036.54	UCH37_DEUBAD_UbPG	0	1037.46	0.258288	0	0	4.17156	0.028799
UCHL5_HUMAN	22	31	IKGFGCRGAQ	9	1036.54	UCH37_DEUBAD_UbPG	1	1038.87	0.161714	1.41187	0.304736	4.15821	0.029839
UCHL5_HUMAN	22	31	IKGFGCRGAQ	9	1036.54	UCH37_DEUBAD_UbPG	10	1039.36	0.15102	1.89962	0.299198	4.15489	0.028001
UCHL5_HUMAN	22	31	IKGFGCRGAQ	9	1036.54	UCH37_DEUBAD_UbPG	30	1039.88	0.177467	2.42289	0.31338	4.1527	0.031745
UCHL5_HUMAN	22	31	IKGFGCRGAQ	9	1036.54	UCH37_DEUBAD_UbPG	60	1040.01	0.111581	2.54431	0.281359	4.1818	0.002703
UCHL5_HUMAN	22	31	IKGFGCRGAQ	9	1036.54	UCH37_DEUBAD_UbPG	120	1040.15	0.088135	2.68749	0.272911	4.15115	0.03046
UCHL5_HUMAN	22	31	IKGFGCRGAQ	9	1036.54	UCH37_DEUBAD_UbPG plus K48 Ub2	0	1037.46	0.258288	0	0	4.17156	0.028799
UCHL5_HUMAN	22	31	IKGFGCRGAQ	9	1036.54	UCH37_DEUBAD_UbPG plus K48 Ub2	1	1039.21	0.243546	1.74796	0.355003	4.18082	0.024545
UCHL5_HUMAN	22	31	IKGFGCRGAQ	9	1036.54	UCH37_DEUBAD_UbPG plus K48 Ub2	10	1039.68	0.089728	2.21925	0.273429	4.18241	0.001938
UCHL5_HUMAN	22	31	IKGFGCRGAQ	9	1036.54	UCH37_DEUBAD_UbPG plus K48 Ub2	30	1040.03	0.222433	2.5667	0.340865	4.16407	0.02139
UCHL5_HUMAN	22	31	IKGFGCRGAQ	9	1036.54	UCH37_DEUBAD_UbPG plus K48 Ub2	60	1040.24	0.164809	2.7825	0.306389	4.17089	0.004202
UCHL5_HUMAN	22	31	IKGFGCRGAQ	9	1036.54	UCH37_DEUBAD_UbPG plus K48 Ub2	120	1040.21	0.157994	2.74782	0.302778	4.15904	0.025601
UCHL5_HUMAN	22	32	IKGFGCRGAQV	10	1135.6	UCH37_DEUBAD UbPG plus K6/48 Ub3	0	1136.2	0.072777	0	0	4.89271	0.034966
UCHL5_HUMAN	22	32	IKGFGCRGAQV	10	1135.6	UCH37_DEUBAD UbPG plus K6/48 Ub3	1	1137.67	0.101346	1.46198	0.12477	4.78587	0.004575
UCHL5_HUMAN	22	32	IKGFGCRGAQV	10	1135.6	UCH37_DEUBAD UbPG plus K6/48 Ub3	10	1138.12	0.082195	1.91617	0.109784	4.78305	0.004114
UCHL5_HUMAN	22	32	IKGFGCRGAQV	10	1135.6	UCH37_DEUBAD UbPG plus K6/48 Ub3	30	1138.88	0.14737	2.67412	0.164361	4.78036	0.004009
UCHL5_HUMAN	22	32	IKGFGCRGAQV	10	1135.6	UCH37_DEUBAD UbPG plus K6/48 Ub3	60	1139.03	0.043282	2.82628	0.084675	4.7834	0.004152
UCHL5_HUMAN	22	32	IKGFGCRGAQV	10	1135.6	UCH37_DEUBAD UbPG plus K6/48 Ub3	120	1139.12	0.028674	2.91776	0.078222	4.78876	0.002076
UCHL5_HUMAN	22	32	IKGFGCRGAQV	10	1135.6	UCH37_DEUBAD UbPG plus Ub	0	1136.2	0.072777	0	0	4.89271	0.034966
UCHL5_HUMAN	22	32	IKGFGCRGAQV	10	1135.6	UCH37_DEUBAD UbPG plus Ub	1	1137.7	0.053706	1.49446	0.090448	4.85505	0.007553
UCHL5_HUMAN	22	32	IKGFGCRGAQV	10	1135.6	UCH37_DEUBAD UbPG plus Ub	10	1138.19	0.091692	1.98276	0.117064	4.85489	0.004706
UCHL5_HUMAN	22	32	IKGFGCRGAQV	10	1135.6	UCH37_DEUBAD UbPG plus Ub	30	1139.05	0.217397	2.84878	0.229255	4.85801	0.018183
UCHL5_HUMAN	22	32	IKGFGCRGAQV	10	1135.6	UCH37_DEUBAD UbPG plus Ub	60	1139.1	0.064855	2.89203	0.097482	4.847	0.002643
UCHL5_HUMAN	22	32	IKGFGCRGAQV	10	1135.6	UCH37_DEUBAD UbPG plus Ub	120	1139.1	0.058522	2.8908	0.093388	4.85407	0.004824
UCHL5_HUMAN	22	32	IKGFGCRGAQV	10	1135.6	UCH37_DEUBAD_UbPG	0	1136.2	0.072777	0	0	4.89271	0.034966
UCHL5_HUMAN	22	32	IKGFGCRGAQV	10	1135.6	UCH37_DEUBAD_UbPG	1	1137.72	0.080414	1.51986	0.108457	4.88177	0.03456
UCHL5_HUMAN	22	32	IKGFGCRGAQV	10	1135.6	UCH37_DEUBAD_UbPG	10	1138.15	0.07494	1.94636	0.104463	4.88192	0.032407
UCHL5_HUMAN	22	32	IKGFGCRGAQV	10	1135.6	UCH37_DEUBAD_UbPG	30	1138.98	0.270561	2.77025	0.280178	4.88105	0.026885
UCHL5_HUMAN	22	32	IKGFGCRGAQV	10	1135.6	UCH37_DEUBAD_UbPG	60	1139.09	0.128839	2.88218	0.147973	4.88518	0.03051
UCHL5_HUMAN	22	32	IKGFGCRGAQV	10	1135.6	UCH37_DEUBAD_UbPG	120	1139.24	0.043309	3.03133	0.084688	4.87653	0.03555
UCHL5_HUMAN	22	32	IKGFGCRGAQV	10	1135.6	UCH37_DEUBAD_UbPG plus K48 Ub2	0	1136.2	0.072777	0	0	4.89271	0.034966
UCHL5_HUMAN	22	32	IKGFGCRGAQV	10	1135.6	UCH37_DEUBAD_UbPG plus K48 Ub2	1	1137.79	0.070451	1.58297	0.101291	4.90065	0.030029
UCHL5_HUMAN	22	32	IKGFGCRGAQV	10	1135.6	UCH37_DEUBAD_UbPG plus K48 Ub2	10	1138.32	0.118841	2.11265	0.139355	4.88852	0.033477
UCHL5_HUMAN	22	32	IKGFGCRGAQV	10	1135.6	UCH37_DEUBAD_UbPG plus K48 Ub2	30	1139.04	0.236749	2.839	0.247683	4.89409	0.022866
UCHL5_HUMAN	22	32	IKGFGCRGAQV	10	1135.6	UCH37_DEUBAD_UbPG plus K48 Ub2	60	1139.18	0.113909	2.9728	0.135173	4.89138	0.029146
UCHL5_HUMAN	22	32	IKGFGCRGAQV	10	1135.6	UCH37_DEUBAD_UbPG plus K48 Ub2	120	1139.13	0.152428	2.92292	0.168911	4.88931	0.029237
UCHL5_HUMAN	22	33	IKGFGCRGAQVE	11	1264.65	UCH37_DEUBAD UbPG plus K6/48 Ub3	0	1265.52	0.134619	0	0	4.6832	0.030496
UCHL5_HUMAN	22	33	IKGFGCRGAQVE	11	1264.65	UCH37_DEUBAD UbPG plus K6/48 Ub3	1	1266.88	0.14487	1.35713	0.197762	4.59233	0.004756
UCHL5_HUMAN	22	33	IKGFGCRGAQVE	11	1264.65	UCH37_DEUBAD UbPG plus K6/48 Ub3	10	1267.47	0.155503	1.94895	0.205678	4.5887	0.003765
UCHL5_HUMAN	22	33	IKGFGCRGAQVE	11	1264.65	UCH37_DEUBAD UbPG plus K6/48 Ub3	30	1268.01	0.095321	2.48922	0.164949	4.58906	0.002864
UCHL5_HUMAN	22	33	IKGFGCRGAQVE	11	1264.65	UCH37_DEUBAD UbPG plus K6/48 Ub3	60	1268.33	0.138839	2.80836	0.193387	4.58915	0.002969
UCHL5_HUMAN	22	33	IKGFGCRGAQVE	11	1264.65	UCH37_DEUBAD UbPG plus K6/48 Ub3	120	1268.47	0.158286	2.95241	0.20779	4.5908	0.001407
UCHL5_HUMAN	22	33	IKGFGCRGAQVE	11	1264.65	UCH37_DEUBAD UbPG plus Ub	0	1265.52	0.134619	0	0	4.6832	0.030496
UCHL5_HUMAN	22	33	IKGFGCRGAQVE	11	1264.65	UCH37_DEUBAD UbPG plus Ub	1	1267.21	0.266427	1.68549	0.298506	4.65183	0.008424
UCHL5_HUMAN	22	33	IKGFGCRGAQVE	11	1264.65	UCH37_DEUBAD UbPG plus Ub	10	1267.75	0.261151	2.22959	0.293806	4.65261	0.002178
UCHL5_HUMAN	22	33	IKGFGCRGAQVE	11	1264.65	UCH37_DEUBAD UbPG plus Ub	30	1268.28	0.215786	2.75454	0.254334	4.6489	0.004004
UCHL5_HUMAN	22	33	IKGFGCRGAQVE	11	1264.65	UCH37_DEUBAD UbPG plus Ub	60	1268.4	0.101934	2.87618	0.168857	4.64785	0.002344
UCHL5_HUMAN	22	33	IKGFGCRGAQVE	11	1264.65	UCH37_DEUBAD UbPG plus Ub	120	1268.67	0.312946	3.14941	0.340672	4.64424	0.00372
UCHL5_HUMAN	22	33	IKGFGCRGAQVE	11	1264.65	UCH37_DEUBAD_UbPG	0	1265.52	0.134619	0	0	4.6832	0.030496
UCHL5_HUMAN	22	33	IKGFGCRGAQVE	11	1264.65	UCH37_DEUBAD_UbPG	1	1267.11	0.11084	1.58618	0.174378	4.67453	0.030628
UCHL5_HUMAN	22	33	IKGFGCRGAQVE	11	1264.65	UCH37_DEUBAD_UbPG	10	1267.58	0.079555	2.06151	0.156369	4.67285	0.027861
UCHL5_HUMAN	22	33	IKGFGCRGAQVE	11	1264.65	UCH37_DEUBAD_UbPG	30	1268.36	0.306607	2.83802	0.334858	4.66893	0.028002
UCHL5_HUMAN	22	33	IKGFGCRGAQVE	11	1264.65	UCH37_DEUBAD_UbPG	60	1268.43	0.212727	2.91082	0.251744	4.6696	0.030484
UCHL5_HUMAN	22	33	IKGFGCRGAQVE	11	1264.65	UCH37_DEUBAD_UbPG	120	1268.46	0.097312	2.94418	0.166108	4.66569	0.031048
UCHL5_HUMAN	22	33	IKGFGCRGAQVE	11	1264.65	UCH37_DEUBAD_UbPG plus K48 Ub2	0	1265.52	0.134619	0	0	4.6832	0.030496
UCHL5_HUMAN	22	33	IKGFGCRGAQVE	11	1264.65	UCH37_DEUBAD_UbPG plus K48 Ub2	1	1267.17	0.162461	1.64875	0.210988	4.68956	0.025805
UCHL5_HUMAN	22	33	IKGFGCRGAQVE	11	1264.65	UCH37_DEUBAD_UbPG plus K48 Ub2	10	1267.82	0.136758	2.29902	0.191898	4.6791	0.028199
UCHL5_HUMAN	22	33	IKGFGCRGAQVE	11	1264.65	UCH37_DEUBAD_UbPG plus K48 Ub2	30	1268.28	0.033537	2.75874	0.138733	4.67019	0.025982
UCHL5_HUMAN	22	33	IKGFGCRGAQVE	11	1264.65	UCH37_DEUBAD_UbPG plus K48 Ub2	60	1268.39	0.136669	2.87312	0.191835	4.67566	0.024988
UCHL5_HUMAN	22	33	IKGFGCRGAQVE	11	1264.65	UCH37_DEUBAD_UbPG plus K48 Ub2	120	1268.59	0.182247	3.0733	0.226575	4.67652	0.025949
UCHL5_HUMAN	22	35	IKGFGCRGAQVEEI	13	1506.77	UCH37_DEUBAD UbPG plus K6/48 Ub3	0	1507.39	0.101884	0	0	5.6824	0.094229
UCHL5_HUMAN	22	35	IKGFGCRGAQVEEI	13	1506.77	UCH37_DEUBAD UbPG plus Ub	0	1507.41	0.078365	0	0	5.6579	0.081253
UCHL5_HUMAN	22	35	IKGFGCRGAQVEEI	13	1506.77	UCH37_DEUBAD UbPG plus Ub	1	1508.74	0	1.33479	0.078365	5.60407	0
UCHL5_HUMAN	22	35	IKGFGCRGAQVEEI	13	1506.77	UCH37_DEUBAD UbPG plus Ub	10	1509.85	0.148978	2.44475	0.168332	5.58734	0.004404
UCHL5_HUMAN	22	35	IKGFGCRGAQVEEI	13	1506.77	UCH37_DEUBAD UbPG plus Ub	30	1510.29	0.041577	2.88761	0.088711	5.58573	0.006397
UCHL5_HUMAN	22	35	IKGFGCRGAQVEEI	13	1506.77	UCH37_DEUBAD UbPG plus Ub	60	1510.93	0.10783	3.52491	0.133298	5.58856	0.002227
UCHL5_HUMAN	22	35	IKGFGCRGAQVEEI	13	1506.77	UCH37_DEUBAD UbPG plus Ub	120	1510.88	0.127579	3.47584	0.149724	5.58071	0.004907
UCHL5_HUMAN	22	35	IKGFGCRGAQVEEI	13	1506.77	UCH37_DEUBAD_UbPG	0	1507.45	0.099019	0	0	5.6575	0.071091
UCHL5_HUMAN	22	35	IKGFGCRGAQVEEI	13	1506.77	UCH37_DEUBAD_UbPG	1	1509.15	0	1.70087	0.099019	5.65713	0
UCHL5_HUMAN	22	35	IKGFGCRGAQVEEI	13	1506.77	UCH37_DEUBAD_UbPG	10	1509.69	0.102639	2.23966	0.142617	5.61716	0.03545
UCHL5_HUMAN	22	35	IKGFGCRGAQVEEI	13	1506.77	UCH37_DEUBAD_UbPG	30	1510.6	0.14058	3.15548	0.171952	5.6053	0.035938
UCHL5_HUMAN	22	35	IKGFGCRGAQVEEI	13	1506.77	UCH37_DEUBAD_UbPG	60	1510.69	0.107476	3.24512	0.146136	5.63038	0.041221
UCHL5_HUMAN	22	35	IKGFGCRGAQVEEI	13	1506.77	UCH37_DEUBAD_UbPG	120	1510.92	0.119125	3.47304	0.154905	5.62162	0.037121
UCHL5_HUMAN	22	35	IKGFGCRGAQVEEI	13	1506.77	UCH37_DEUBAD_UbPG plus K48 Ub2	0	1507.45	0.099019	0	0	5.6575	0.071091
UCHL5_HUMAN	22	35	IKGFGCRGAQVEEI	13	1506.77	UCH37_DEUBAD_UbPG plus K48 Ub2	1	1509.1	0.162265	1.65456	0.190091	5.64361	0.026956
UCHL5_HUMAN	22	35	IKGFGCRGAQVEEI	13	1506.77	UCH37_DEUBAD_UbPG plus K48 Ub2	10	1510.21	0.291576	2.76137	0.307931	5.6298	0.034302
UCHL5_HUMAN	22	35	IKGFGCRGAQVEEI	13	1506.77	UCH37_DEUBAD_UbPG plus K48 Ub2	30	1510.72	0.215344	3.26945	0.237018	5.62851	0.028567
UCHL5_HUMAN	22	35	IKGFGCRGAQVEEI	13	1506.77	UCH37_DEUBAD_UbPG plus K48 Ub2	60	1510.95	0.153689	3.50401	0.182825	5.63308	0.025928
UCHL5_HUMAN	22	35	IKGFGCRGAQVEEI	13	1506.77	UCH37_DEUBAD_UbPG plus K48 Ub2	120	1510.97	0.082548	3.52563	0.128915	5.6268	0.029466
UCHL5_HUMAN	23	31	KGFGCRGAQ	8	923.452	UCH37_DEUBAD UbPG plus K6/48 Ub3	0	924.12	0.088601	0	0	4.17214	0.031903
UCHL5_HUMAN	23	31	KGFGCRGAQ	8	923.452	UCH37_DEUBAD UbPG plus K6/48 Ub3	1	925.419	0.041487	1.29907	0.097833	4.08986	0.007991
UCHL5_HUMAN	23	31	KGFGCRGAQ	8	923.452	UCH37_DEUBAD UbPG plus K6/48 Ub3	10	925.906	0.070289	1.78576	0.113096	4.08318	0.002285
UCHL5_HUMAN	23	31	KGFGCRGAQ	8	923.452	UCH37_DEUBAD UbPG plus K6/48 Ub3	30	926.373	0.050293	2.25311	0.10188	4.08375	0.002304
UCHL5_HUMAN	23	31	KGFGCRGAQ	8	923.452	UCH37_DEUBAD UbPG plus K6/48 Ub3	60	926.651	0.064769	2.53115	0.10975	4.08437	0.002466
UCHL5_HUMAN	23	31	KGFGCRGAQ	8	923.452	UCH37_DEUBAD UbPG plus K6/48 Ub3	120	926.689	0.050513	2.56915	0.101989	4.08699	0.00179
UCHL5_HUMAN	23	31	KGFGCRGAQ	8	923.452	UCH37_DEUBAD UbPG plus Ub	0	924.12	0.088601	0	0	4.17214	0.031903
UCHL5_HUMAN	23	31	KGFGCRGAQ	8	923.452	UCH37_DEUBAD UbPG plus Ub	1	925.376	0.174766	1.25603	0.195942	4.14185	0.011703
UCHL5_HUMAN	23	31	KGFGCRGAQ	8	923.452	UCH37_DEUBAD UbPG plus Ub	10	925.95	0.037329	1.83032	0.096144	4.13488	0.002598
UCHL5_HUMAN	23	31	KGFGCRGAQ	8	923.452	UCH37_DEUBAD UbPG plus Ub	30	926.296	0.122502	2.17627	0.151185	4.13323	0.005642
UCHL5_HUMAN	23	31	KGFGCRGAQ	8	923.452	UCH37_DEUBAD UbPG plus Ub	60	926.684	0.042958	2.56341	0.098466	4.13287	0.002775
UCHL5_HUMAN	23	31	KGFGCRGAQ	8	923.452	UCH37_DEUBAD UbPG plus Ub	120	926.749	0.084873	2.62886	0.122693	4.1323	0.013908
UCHL5_HUMAN	23	31	KGFGCRGAQ	8	923.452	UCH37_DEUBAD_UbPG	0	924.12	0.088601	0	0	4.17214	0.031903
UCHL5_HUMAN	23	31	KGFGCRGAQ	8	923.452	UCH37_DEUBAD_UbPG	1	925.497	0.144516	1.3768	0.169515	4.15904	0.030885
UCHL5_HUMAN	23	31	KGFGCRGAQ	8	923.452	UCH37_DEUBAD_UbPG	10	925.834	0.073979	1.71382	0.115425	4.15629	0.027853
UCHL5_HUMAN	23	31	KGFGCRGAQ	8	923.452	UCH37_DEUBAD_UbPG	30	926.494	0.145878	2.37431	0.170677	4.1533	0.030547
UCHL5_HUMAN	23	31	KGFGCRGAQ	8	923.452	UCH37_DEUBAD_UbPG	60	926.606	0.049065	2.48609	0.101279	4.15256	0.030821
UCHL5_HUMAN	23	31	KGFGCRGAQ	8	923.452	UCH37_DEUBAD_UbPG	120	926.783	0.085558	2.66264	0.123168	4.15145	0.031281
UCHL5_HUMAN	23	31	KGFGCRGAQ	8	923.452	UCH37_DEUBAD_UbPG plus K48 Ub2	0	924.12	0.088601	0	0	4.17214	0.031903
UCHL5_HUMAN	23	31	KGFGCRGAQ	8	923.452	UCH37_DEUBAD_UbPG plus K48 Ub2	1	925.562	0.199539	1.44142	0.218325	4.17664	0.024464
UCHL5_HUMAN	23	31	KGFGCRGAQ	8	923.452	UCH37_DEUBAD_UbPG plus K48 Ub2	10	926.123	0.137961	2.00273	0.163962	4.16199	0.029007
UCHL5_HUMAN	23	31	KGFGCRGAQ	8	923.452	UCH37_DEUBAD_UbPG plus K48 Ub2	30	926.55	0.206426	2.43031	0.224637	4.16247	0.021497
UCHL5_HUMAN	23	31	KGFGCRGAQ	8	923.452	UCH37_DEUBAD_UbPG plus K48 Ub2	60	926.704	0.083979	2.58354	0.122076	4.15733	0.022163
UCHL5_HUMAN	23	31	KGFGCRGAQ	8	923.452	UCH37_DEUBAD_UbPG plus K48 Ub2	120	926.716	0.087696	2.59589	0.124663	4.1585	0.024888
UCHL5_HUMAN	24	31	GFGCRGAQ	7	795.357	UCH37_DEUBAD UbPG plus K6/48 Ub3	0	795.782	0.040718	0	0	4.1657	0.029431
UCHL5_HUMAN	24	31	GFGCRGAQ	7	795.357	UCH37_DEUBAD UbPG plus K6/48 Ub3	1	797.059	0.050525	1.27717	0.06489	4.09275	0.007057
UCHL5_HUMAN	24	31	GFGCRGAQ	7	795.357	UCH37_DEUBAD UbPG plus K6/48 Ub3	10	797.464	0.062116	1.68182	0.074272	4.08396	0.001875
UCHL5_HUMAN	24	31	GFGCRGAQ	7	795.357	UCH37_DEUBAD UbPG plus K6/48 Ub3	30	797.994	0.069675	2.2121	0.0807	4.08376	0.002345
UCHL5_HUMAN	24	31	GFGCRGAQ	7	795.357	UCH37_DEUBAD UbPG plus K6/48 Ub3	60	798.234	0.070275	2.4521	0.081219	4.08352	0.003056
UCHL5_HUMAN	24	31	GFGCRGAQ	7	795.357	UCH37_DEUBAD UbPG plus K6/48 Ub3	120	798.309	0.084121	2.52677	0.093458	4.08713	0.001956
UCHL5_HUMAN	24	31	GFGCRGAQ	7	795.357	UCH37_DEUBAD UbPG plus Ub	0	795.782	0.040718	0	0	4.1657	0.029431
UCHL5_HUMAN	24	31	GFGCRGAQ	7	795.357	UCH37_DEUBAD UbPG plus Ub	1	797.111	0.011721	1.32883	0.042372	4.13416	0.008628
UCHL5_HUMAN	24	31	GFGCRGAQ	7	795.357	UCH37_DEUBAD UbPG plus Ub	10	797.578	0.102937	1.79634	0.110697	4.13184	0.003168
UCHL5_HUMAN	24	31	GFGCRGAQ	7	795.357	UCH37_DEUBAD UbPG plus Ub	30	797.923	0.057895	2.14104	0.07078	4.13117	0.005435
UCHL5_HUMAN	24	31	GFGCRGAQ	7	795.357	UCH37_DEUBAD UbPG plus Ub	60	798.215	0.082259	2.43247	0.091785	4.13118	0.001389
UCHL5_HUMAN	24	31	GFGCRGAQ	7	795.357	UCH37_DEUBAD UbPG plus Ub	120	798.243	0.039761	2.46043	0.056911	4.1275	0.002889
UCHL5_HUMAN	24	31	GFGCRGAQ	7	795.357	UCH37_DEUBAD_UbPG	0	795.782	0.040718	0	0	4.1657	0.029431
UCHL5_HUMAN	24	31	GFGCRGAQ	7	795.357	UCH37_DEUBAD_UbPG	1	797.114	0.108205	1.33216	0.115613	4.1512	0.029332
UCHL5_HUMAN	24	31	GFGCRGAQ	7	795.357	UCH37_DEUBAD_UbPG	10	797.539	0.091167	1.75674	0.099847	4.15065	0.027997
UCHL5_HUMAN	24	31	GFGCRGAQ	7	795.357	UCH37_DEUBAD_UbPG	30	798.063	0.1487	2.28076	0.154174	4.14938	0.031114
UCHL5_HUMAN	24	31	GFGCRGAQ	7	795.357	UCH37_DEUBAD_UbPG	60	798.163	0.13141	2.38078	0.137574	4.14916	0.030233
UCHL5_HUMAN	24	31	GFGCRGAQ	7	795.357	UCH37_DEUBAD_UbPG	120	798.328	0.107167	2.54585	0.114642	4.14687	0.029353
UCHL5_HUMAN	24	31	GFGCRGAQ	7	795.357	UCH37_DEUBAD_UbPG plus K48 Ub2	0	795.782	0.040718	0	0	4.1657	0.029431
UCHL5_HUMAN	24	31	GFGCRGAQ	7	795.357	UCH37_DEUBAD_UbPG plus K48 Ub2	1	797.239	0.093226	1.45686	0.101731	4.17383	0.026082
UCHL5_HUMAN	24	31	GFGCRGAQ	7	795.357	UCH37_DEUBAD_UbPG plus K48 Ub2	10	797.823	0.174152	2.04038	0.178849	4.16108	0.027128
UCHL5_HUMAN	24	31	GFGCRGAQ	7	795.357	UCH37_DEUBAD_UbPG plus K48 Ub2	30	798.155	0.184273	2.37278	0.188718	4.16189	0.020033
UCHL5_HUMAN	24	31	GFGCRGAQ	7	795.357	UCH37_DEUBAD_UbPG plus K48 Ub2	60	798.273	0.099971	2.49075	0.107945	4.15502	0.021892
UCHL5_HUMAN	24	31	GFGCRGAQ	7	795.357	UCH37_DEUBAD_UbPG plus K48 Ub2	120	798.276	0.105499	2.49353	0.113084	4.15601	0.025565
UCHL5_HUMAN	32	38	VEEIWSL	6	875.451	UCH37_DEUBAD UbPG plus Ub	0	875.865	0.009154	0	0	7.93027	0.015852
UCHL5_HUMAN	32	38	VEEIWSL	6	875.451	UCH37_DEUBAD UbPG plus Ub	1	877.154	0.009705	1.28935	0.013341	7.912	0.007724
UCHL5_HUMAN	32	38	VEEIWSL	6	875.451	UCH37_DEUBAD UbPG plus Ub	10	877.884	0.002637	2.01991	0.009526	7.9074	0.001218
UCHL5_HUMAN	32	38	VEEIWSL	6	875.451	UCH37_DEUBAD UbPG plus Ub	30	878.351	0.039089	2.48661	0.040146	7.90525	0.002599
UCHL5_HUMAN	32	38	VEEIWSL	6	875.451	UCH37_DEUBAD UbPG plus Ub	60	878.752	0.007209	2.88748	0.011652	7.90616	0.003923
UCHL5_HUMAN	32	38	VEEIWSL	6	875.451	UCH37_DEUBAD UbPG plus Ub	120	878.821	0.000533	2.95628	0.00917	7.90224	0.001639
UCHL5_HUMAN	32	38	VEEIWSL	6	875.451	UCH37_DEUBAD_UbPG	0	875.865	0.009154	0	0	7.93027	0.015852
UCHL5_HUMAN	32	38	VEEIWSL	6	875.451	UCH37_DEUBAD_UbPG	1	876.983	0.06821	1.11892	0.068822	7.92644	0.015887
UCHL5_HUMAN	32	38	VEEIWSL	6	875.451	UCH37_DEUBAD_UbPG	10	877.871	0.073452	2.00689	0.074021	7.92184	0.012944
UCHL5_HUMAN	32	38	VEEIWSL	6	875.451	UCH37_DEUBAD_UbPG	30	878.386	0.017772	2.52145	0.019991	7.91842	0.013868
UCHL5_HUMAN	32	38	VEEIWSL	6	875.451	UCH37_DEUBAD_UbPG	60	878.578	0.010091	2.71379	0.013624	7.91938	0.014585
UCHL5_HUMAN	32	38	VEEIWSL	6	875.451	UCH37_DEUBAD_UbPG	120	878.715	0.20086	2.85034	0.201068	7.91965	0.016816
UCHL5_HUMAN	32	38	VEEIWSL	6	875.451	UCH37_DEUBAD_UbPG plus K48 Ub2	0	875.865	0.009154	0	0	7.93027	0.015852
UCHL5_HUMAN	32	38	VEEIWSL	6	875.451	UCH37_DEUBAD_UbPG plus K48 Ub2	1	877.057	0.113185	1.19253	0.113555	7.93274	0.016888
UCHL5_HUMAN	32	38	VEEIWSL	6	875.451	UCH37_DEUBAD_UbPG plus K48 Ub2	10	877.931	0.027965	2.06669	0.029425	7.92394	0.01768
UCHL5_HUMAN	32	38	VEEIWSL	6	875.451	UCH37_DEUBAD_UbPG plus K48 Ub2	30	878.369	0.153787	2.50399	0.154059	7.92493	0.011172
UCHL5_HUMAN	32	38	VEEIWSL	6	875.451	UCH37_DEUBAD_UbPG plus K48 Ub2	60	878.733	0.06328	2.86878	0.063939	7.92282	0.014253
UCHL5_HUMAN	32	38	VEEIWSL	6	875.451	UCH37_DEUBAD_UbPG plus K48 Ub2	120	878.666	0.121538	2.80103	0.121882	7.92144	0.012707
UCHL5_HUMAN	32	42	VEEIWSLEPEN	9	1344.63	UCH37_DEUBAD UbPG plus K6/48 Ub3	0	1345.36	0.015153	0	0	7.24108	0.009551
UCHL5_HUMAN	32	42	VEEIWSLEPEN	9	1344.63	UCH37_DEUBAD UbPG plus K6/48 Ub3	1	1347.4	0.001587	2.03865	0.015236	7.17672	0.003145
UCHL5_HUMAN	32	42	VEEIWSLEPEN	9	1344.63	UCH37_DEUBAD UbPG plus K6/48 Ub3	10	1348.74	0.071535	3.37591	0.073123	7.17435	0.002351
UCHL5_HUMAN	32	42	VEEIWSLEPEN	9	1344.63	UCH37_DEUBAD UbPG plus K6/48 Ub3	30	1349.18	0.126447	3.82163	0.127352	7.17273	0.002075
UCHL5_HUMAN	32	42	VEEIWSLEPEN	9	1344.63	UCH37_DEUBAD UbPG plus K6/48 Ub3	60	1349.74	0.020496	4.38036	0.025489	7.17127	0.001453
UCHL5_HUMAN	32	42	VEEIWSLEPEN	9	1344.63	UCH37_DEUBAD UbPG plus K6/48 Ub3	120	1350.09	0.050462	4.72863	0.052688	7.17471	0.002468
UCHL5_HUMAN	32	42	VEEIWSLEPEN	9	1344.63	UCH37_DEUBAD UbPG plus Ub	0	1345.36	0.033953	0	0	7.24098	0.009572
UCHL5_HUMAN	32	42	VEEIWSLEPEN	9	1344.63	UCH37_DEUBAD UbPG plus Ub	1	1347.71	0.02624	2.35473	0.042911	7.22734	0.003758
UCHL5_HUMAN	32	42	VEEIWSLEPEN	9	1344.63	UCH37_DEUBAD UbPG plus Ub	10	1348.61	0.020045	3.24955	0.039429	7.2254	0.004145
UCHL5_HUMAN	32	42	VEEIWSLEPEN	9	1344.63	UCH37_DEUBAD UbPG plus Ub	30	1349.32	0.009559	3.9652	0.035273	7.22307	0.001937
UCHL5_HUMAN	32	42	VEEIWSLEPEN	9	1344.63	UCH37_DEUBAD UbPG plus Ub	60	1349.74	0.011641	4.38002	0.035893	7.22254	0.002757
UCHL5_HUMAN	32	42	VEEIWSLEPEN	9	1344.63	UCH37_DEUBAD UbPG plus Ub	120	1349.71	0.282699	4.35336	0.284731	7.22156	0.003107
UCHL5_HUMAN	32	42	VEEIWSLEPEN	9	1344.63	UCH37_DEUBAD_UbPG	0	1345.36	0.033953	0	0	7.24098	0.009572
UCHL5_HUMAN	32	42	VEEIWSLEPEN	9	1344.63	UCH37_DEUBAD_UbPG	1	1347.7	0.014197	2.34503	0.036802	7.23619	0.006922
UCHL5_HUMAN	32	42	VEEIWSLEPEN	9	1344.63	UCH37_DEUBAD_UbPG	10	1348.6	0.013432	3.24296	0.036513	7.23444	0.006888
UCHL5_HUMAN	32	42	VEEIWSLEPEN	9	1344.63	UCH37_DEUBAD_UbPG	30	1349.22	0.153516	3.86169	0.157226	7.23335	0.006423
UCHL5_HUMAN	32	42	VEEIWSLEPEN	9	1344.63	UCH37_DEUBAD_UbPG	60	1349.74	0.027695	4.37981	0.043816	7.23248	0.009546
UCHL5_HUMAN	32	42	VEEIWSLEPEN	9	1344.63	UCH37_DEUBAD_UbPG	120	1349.93	0.029961	4.56996	0.045282	7.2318	0.011862
UCHL5_HUMAN	32	42	VEEIWSLEPEN	9	1344.63	UCH37_DEUBAD_UbPG plus K48 Ub2	0	1345.36	0.033953	0	0	7.24098	0.009572
UCHL5_HUMAN	32	42	VEEIWSLEPEN	9	1344.63	UCH37_DEUBAD_UbPG plus K48 Ub2	1	1347.81	0.059079	2.44704	0.06814	7.23841	0.01021
UCHL5_HUMAN	32	42	VEEIWSLEPEN	9	1344.63	UCH37_DEUBAD_UbPG plus K48 Ub2	10	1348.79	0.087146	3.43519	0.093526	7.23259	0.007745
UCHL5_HUMAN	32	42	VEEIWSLEPEN	9	1344.63	UCH37_DEUBAD_UbPG plus K48 Ub2	30	1349.42	0.097798	4.06427	0.103524	7.23491	0.005622
UCHL5_HUMAN	32	42	VEEIWSLEPEN	9	1344.63	UCH37_DEUBAD_UbPG plus K48 Ub2	60	1349.63	0.055796	4.27156	0.065314	7.23019	0.006656
UCHL5_HUMAN	32	42	VEEIWSLEPEN	9	1344.63	UCH37_DEUBAD_UbPG plus K48 Ub2	120	1349.84	0.191119	4.476	0.194112	7.23274	0.008624
UCHL5_HUMAN	32	43	VEEIWSLEPENF	10	1491.7	UCH37_DEUBAD UbPG plus K6/48 Ub3	0	1492.44	0.020853	0	0	8.15059	0.013104
UCHL5_HUMAN	32	43	VEEIWSLEPENF	10	1491.7	UCH37_DEUBAD UbPG plus K6/48 Ub3	1	1495.17	0.039163	2.73325	0.044369	8.06636	0.008688
UCHL5_HUMAN	32	43	VEEIWSLEPENF	10	1491.7	UCH37_DEUBAD UbPG plus K6/48 Ub3	10	1496.29	0.005426	3.8436	0.021547	8.06455	0.003684
UCHL5_HUMAN	32	43	VEEIWSLEPENF	10	1491.7	UCH37_DEUBAD UbPG plus K6/48 Ub3	30	1497.2	0.034611	4.75362	0.040408	8.06709	0.002377
UCHL5_HUMAN	32	43	VEEIWSLEPENF	10	1491.7	UCH37_DEUBAD UbPG plus K6/48 Ub3	60	1497.53	0.146197	5.09177	0.147677	8.06267	0.002008
UCHL5_HUMAN	32	43	VEEIWSLEPENF	10	1491.7	UCH37_DEUBAD UbPG plus K6/48 Ub3	120	1497.68	0.16196	5.24057	0.163297	8.06671	0.003113
UCHL5_HUMAN	32	43	VEEIWSLEPENF	10	1491.7	UCH37_DEUBAD UbPG plus Ub	0	1492.44	0.020853	0	0	8.15059	0.013104
UCHL5_HUMAN	32	43	VEEIWSLEPENF	10	1491.7	UCH37_DEUBAD UbPG plus Ub	1	1495.11	0.047994	2.66468	0.052329	8.12973	0.003613
UCHL5_HUMAN	32	43	VEEIWSLEPENF	10	1491.7	UCH37_DEUBAD UbPG plus Ub	10	1496.33	0.019807	3.88436	0.02876	8.12995	0.000298
UCHL5_HUMAN	32	43	VEEIWSLEPENF	10	1491.7	UCH37_DEUBAD UbPG plus Ub	30	1497.08	2.58508e-05	4.63698	0.020853	8.12652	0.005122
UCHL5_HUMAN	32	43	VEEIWSLEPENF	10	1491.7	UCH37_DEUBAD UbPG plus Ub	60	1497.46	0.069557	5.01656	0.072615	8.12658	0.000978
UCHL5_HUMAN	32	43	VEEIWSLEPENF	10	1491.7	UCH37_DEUBAD UbPG plus Ub	120	1497.6	0.086061	5.15574	0.088551	8.12402	0.001114
UCHL5_HUMAN	32	43	VEEIWSLEPENF	10	1491.7	UCH37_DEUBAD_UbPG	0	1492.44	0.020853	0	0	8.15059	0.013104
UCHL5_HUMAN	32	43	VEEIWSLEPENF	10	1491.7	UCH37_DEUBAD_UbPG	1	1495.38	0.095776	2.93513	0.09802	8.14705	0.012093
UCHL5_HUMAN	32	43	VEEIWSLEPENF	10	1491.7	UCH37_DEUBAD_UbPG	10	1496.46	0.063983	4.02298	0.067295	8.14334	0.011176
UCHL5_HUMAN	32	43	VEEIWSLEPENF	10	1491.7	UCH37_DEUBAD_UbPG	30	1497.16	0.048882	4.71728	0.053144	8.14103	0.008663
UCHL5_HUMAN	32	43	VEEIWSLEPENF	10	1491.7	UCH37_DEUBAD_UbPG	60	1497.5	0.008162	5.05669	0.022394	8.14301	0.013665
UCHL5_HUMAN	32	43	VEEIWSLEPENF	10	1491.7	UCH37_DEUBAD_UbPG	120	1497.76	0.051306	5.31828	0.055382	8.14112	0.01254
UCHL5_HUMAN	32	43	VEEIWSLEPENF	10	1491.7	UCH37_DEUBAD_UbPG plus K48 Ub2	0	1492.44	0.020853	0	0	8.15059	0.013104
UCHL5_HUMAN	32	43	VEEIWSLEPENF	10	1491.7	UCH37_DEUBAD_UbPG plus K48 Ub2	1	1495.28	0.082411	2.83613	0.085009	8.1469	0.012354
UCHL5_HUMAN	32	43	VEEIWSLEPENF	10	1491.7	UCH37_DEUBAD_UbPG plus K48 Ub2	10	1496.52	0.069749	4.07467	0.072799	8.14078	0.011564
UCHL5_HUMAN	32	43	VEEIWSLEPENF	10	1491.7	UCH37_DEUBAD_UbPG plus K48 Ub2	30	1497.16	0.034834	4.71882	0.040599	8.14091	0.008048
UCHL5_HUMAN	32	43	VEEIWSLEPENF	10	1491.7	UCH37_DEUBAD_UbPG plus K48 Ub2	60	1497.55	0.097341	5.11224	0.09955	8.13544	0.009288
UCHL5_HUMAN	32	43	VEEIWSLEPENF	10	1491.7	UCH37_DEUBAD_UbPG plus K48 Ub2	120	1497.75	0.151215	5.30597	0.152646	8.13707	0.008771
UCHL5_HUMAN	34	43	EIWSLEPENF	8	1263.59	UCH37_DEUBAD UbPG plus K6/48 Ub3	0	1264.27	0.018928	0	0	8.0206	0.016224
UCHL5_HUMAN	34	43	EIWSLEPENF	8	1263.59	UCH37_DEUBAD UbPG plus K6/48 Ub3	1	1266.97	0.018675	2.70248	0.02659	7.92884	0.003035
UCHL5_HUMAN	34	43	EIWSLEPENF	8	1263.59	UCH37_DEUBAD UbPG plus K6/48 Ub3	10	1267.85	0.014591	3.58191	0.023899	7.92637	0.00394
UCHL5_HUMAN	34	43	EIWSLEPENF	8	1263.59	UCH37_DEUBAD UbPG plus K6/48 Ub3	30	1268.56	0.005328	4.28971	0.019663	7.93103	0.001602
UCHL5_HUMAN	34	43	EIWSLEPENF	8	1263.59	UCH37_DEUBAD UbPG plus K6/48 Ub3	60	1268.96	0.114177	4.68764	0.115735	7.92804	0.00126
UCHL5_HUMAN	34	43	EIWSLEPENF	8	1263.59	UCH37_DEUBAD UbPG plus K6/48 Ub3	120	1269.11	0.025149	4.84297	0.031476	7.9301	0.002327
UCHL5_HUMAN	34	43	EIWSLEPENF	8	1263.59	UCH37_DEUBAD UbPG plus Ub	0	1264.27	0.018928	0	0	8.0206	0.016224
UCHL5_HUMAN	34	43	EIWSLEPENF	8	1263.59	UCH37_DEUBAD UbPG plus Ub	1	1266.9	0.031883	2.63093	0.037079	7.99524	0.005107
UCHL5_HUMAN	34	43	EIWSLEPENF	8	1263.59	UCH37_DEUBAD UbPG plus Ub	10	1267.96	0.061462	3.68874	0.06431	7.99416	0.001025
UCHL5_HUMAN	34	43	EIWSLEPENF	8	1263.59	UCH37_DEUBAD UbPG plus Ub	30	1268.49	0.013112	4.22406	0.023026	7.99108	0.003385
UCHL5_HUMAN	34	43	EIWSLEPENF	8	1263.59	UCH37_DEUBAD UbPG plus Ub	60	1268.76	0.003245	4.48977	0.019204	7.9905	0.003222
UCHL5_HUMAN	34	43	EIWSLEPENF	8	1263.59	UCH37_DEUBAD UbPG plus Ub	120	1268.96	0.068782	4.68671	0.071339	7.98823	0.000614
UCHL5_HUMAN	34	43	EIWSLEPENF	8	1263.59	UCH37_DEUBAD_UbPG	0	1264.27	0.018928	0	0	8.0206	0.016224
UCHL5_HUMAN	34	43	EIWSLEPENF	8	1263.59	UCH37_DEUBAD_UbPG	1	1266.88	0.007827	2.61287	0.020482	8.01463	0.014662
UCHL5_HUMAN	34	43	EIWSLEPENF	8	1263.59	UCH37_DEUBAD_UbPG	10	1267.91	0.007719	3.64066	0.020441	8.00854	0.011184
UCHL5_HUMAN	34	43	EIWSLEPENF	8	1263.59	UCH37_DEUBAD_UbPG	30	1268.51	0.038133	4.23761	0.042572	8.0065	0.011036
UCHL5_HUMAN	34	43	EIWSLEPENF	8	1263.59	UCH37_DEUBAD_UbPG	60	1268.79	0.001918	4.5213	0.019025	8.00946	0.012735
UCHL5_HUMAN	34	43	EIWSLEPENF	8	1263.59	UCH37_DEUBAD_UbPG	120	1268.99	0.05243	4.72051	0.055742	8.0078	0.017542
UCHL5_HUMAN	34	43	EIWSLEPENF	8	1263.59	UCH37_DEUBAD_UbPG plus K48 Ub2	0	1264.27	0.018928	0	0	8.0206	0.016224
UCHL5_HUMAN	34	43	EIWSLEPENF	8	1263.59	UCH37_DEUBAD_UbPG plus K48 Ub2	1	1266.94	0.007501	2.6677	0.02036	8.01727	0.015418
UCHL5_HUMAN	34	43	EIWSLEPENF	8	1263.59	UCH37_DEUBAD_UbPG plus K48 Ub2	10	1267.97	0.052353	3.69735	0.05567	8.0072	0.013285
UCHL5_HUMAN	34	43	EIWSLEPENF	8	1263.59	UCH37_DEUBAD_UbPG plus K48 Ub2	30	1268.51	0.04033	4.23826	0.044551	8.00726	0.00859
UCHL5_HUMAN	34	43	EIWSLEPENF	8	1263.59	UCH37_DEUBAD_UbPG plus K48 Ub2	60	1268.82	0.044147	4.55339	0.048034	8.00289	0.009816
UCHL5_HUMAN	34	43	EIWSLEPENF	8	1263.59	UCH37_DEUBAD_UbPG plus K48 Ub2	120	1268.93	0.071074	4.66195	0.073551	8.00296	0.01102
UCHL5_HUMAN	35	43	IWSLEPENF	7	1134.55	UCH37_DEUBAD UbPG plus K6/48 Ub3	0	1135.15	0.053613	0	0	7.95697	0.015958
UCHL5_HUMAN	35	43	IWSLEPENF	7	1134.55	UCH37_DEUBAD UbPG plus K6/48 Ub3	1	1137.87	0.115192	2.71912	0.127057	7.86182	0.003979
UCHL5_HUMAN	35	43	IWSLEPENF	7	1134.55	UCH37_DEUBAD UbPG plus K6/48 Ub3	10	1138.71	0.051465	3.56038	0.074317	7.86195	0.002556
UCHL5_HUMAN	35	43	IWSLEPENF	7	1134.55	UCH37_DEUBAD UbPG plus K6/48 Ub3	30	1139.08	0.012495	3.93315	0.055049	7.86662	0.00257
UCHL5_HUMAN	35	43	IWSLEPENF	7	1134.55	UCH37_DEUBAD UbPG plus K6/48 Ub3	60	1139.33	0.015842	4.18257	0.055904	7.86395	0.003116
UCHL5_HUMAN	35	43	IWSLEPENF	7	1134.55	UCH37_DEUBAD UbPG plus K6/48 Ub3	120	1139.46	0.008891	4.3053	0.054345	7.86642	0.001522
UCHL5_HUMAN	35	43	IWSLEPENF	7	1134.55	UCH37_DEUBAD UbPG plus Ub	0	1135.15	0.053613	0	0	7.95697	0.015958
UCHL5_HUMAN	35	43	IWSLEPENF	7	1134.55	UCH37_DEUBAD UbPG plus Ub	1	1137.77	0.041977	2.62272	0.068091	7.93497	0.005456
UCHL5_HUMAN	35	43	IWSLEPENF	7	1134.55	UCH37_DEUBAD UbPG plus Ub	10	1138.67	0.089711	3.52215	0.10451	7.93233	0.001303
UCHL5_HUMAN	35	43	IWSLEPENF	7	1134.55	UCH37_DEUBAD UbPG plus Ub	30	1139.06	0.034802	3.91304	0.063918	7.93099	0.003561
UCHL5_HUMAN	35	43	IWSLEPENF	7	1134.55	UCH37_DEUBAD UbPG plus Ub	60	1139.26	0.115569	4.10422	0.127399	7.93011	0.003495
UCHL5_HUMAN	35	43	IWSLEPENF	7	1134.55	UCH37_DEUBAD UbPG plus Ub	120	1139.32	0.062357	4.17179	0.082236	7.92803	0.00158
UCHL5_HUMAN	35	43	IWSLEPENF	7	1134.55	UCH37_DEUBAD_UbPG	0	1135.15	0.053613	0	0	7.95697	0.015958
UCHL5_HUMAN	35	43	IWSLEPENF	7	1134.55	UCH37_DEUBAD_UbPG	1	1137.75	0.049968	2.60173	0.073288	7.95301	0.014836
UCHL5_HUMAN	35	43	IWSLEPENF	7	1134.55	UCH37_DEUBAD_UbPG	10	1138.7	0.039441	3.55062	0.066558	7.94936	0.014484
UCHL5_HUMAN	35	43	IWSLEPENF	7	1134.55	UCH37_DEUBAD_UbPG	30	1139.05	0.058685	3.89921	0.079487	7.94654	0.01381
UCHL5_HUMAN	35	43	IWSLEPENF	7	1134.55	UCH37_DEUBAD_UbPG	60	1139.25	0.034379	4.10112	0.063689	7.94809	0.013778
UCHL5_HUMAN	35	43	IWSLEPENF	7	1134.55	UCH37_DEUBAD_UbPG	120	1139.32	0.057931	4.17268	0.078932	7.94907	0.015229
UCHL5_HUMAN	35	43	IWSLEPENF	7	1134.55	UCH37_DEUBAD_UbPG plus K48 Ub2	0	1135.15	0.053613	0	0	7.95697	0.015958
UCHL5_HUMAN	35	43	IWSLEPENF	7	1134.55	UCH37_DEUBAD_UbPG plus K48 Ub2	1	1137.81	0.071189	2.65619	0.089119	7.95691	0.014421
UCHL5_HUMAN	35	43	IWSLEPENF	7	1134.55	UCH37_DEUBAD_UbPG plus K48 Ub2	10	1138.66	0.050248	3.51078	0.073479	7.94971	0.015946
UCHL5_HUMAN	35	43	IWSLEPENF	7	1134.55	UCH37_DEUBAD_UbPG plus K48 Ub2	30	1139.08	0.076263	3.92414	0.093222	7.94969	0.012537
UCHL5_HUMAN	35	43	IWSLEPENF	7	1134.55	UCH37_DEUBAD_UbPG plus K48 Ub2	60	1139.26	0.06559	4.10531	0.084713	7.94459	0.013463
UCHL5_HUMAN	35	43	IWSLEPENF	7	1134.55	UCH37_DEUBAD_UbPG plus K48 Ub2	120	1139.32	0.058353	4.16487	0.079243	7.94577	0.014959
UCHL5_HUMAN	36	42	WSLEPEN	5	874.394	UCH37_DEUBAD UbPG plus K6/48 Ub3	0	874.984	0.037652	0	0	6.2989	0.01561
UCHL5_HUMAN	36	42	WSLEPEN	5	874.394	UCH37_DEUBAD UbPG plus K6/48 Ub3	1	877.094	0.040154	2.11032	0.055046	6.24445	0.006008
UCHL5_HUMAN	36	42	WSLEPEN	5	874.394	UCH37_DEUBAD UbPG plus K6/48 Ub3	10	877.306	0.023704	2.32186	0.044493	6.23786	0.002704
UCHL5_HUMAN	36	42	WSLEPEN	5	874.394	UCH37_DEUBAD UbPG plus K6/48 Ub3	30	877.588	0.031428	2.60411	0.049045	6.23816	0.002712
UCHL5_HUMAN	36	42	WSLEPEN	5	874.394	UCH37_DEUBAD UbPG plus K6/48 Ub3	60	877.805	0.024241	2.82133	0.044781	6.23791	0.002755
UCHL5_HUMAN	36	42	WSLEPEN	5	874.394	UCH37_DEUBAD UbPG plus K6/48 Ub3	120	877.86	0.04356	2.87589	0.057578	6.24097	0.001316
UCHL5_HUMAN	36	42	WSLEPEN	5	874.394	UCH37_DEUBAD UbPG plus Ub	0	874.984	0.037652	0	0	6.2989	0.01561
UCHL5_HUMAN	36	42	WSLEPEN	5	874.394	UCH37_DEUBAD UbPG plus Ub	1	877.053	0.030651	2.06854	0.048551	6.28973	0.009808
UCHL5_HUMAN	36	42	WSLEPEN	5	874.394	UCH37_DEUBAD UbPG plus Ub	10	877.31	0.036251	2.32568	0.052267	6.28789	0.002575
UCHL5_HUMAN	36	42	WSLEPEN	5	874.394	UCH37_DEUBAD UbPG plus Ub	30	877.578	0.029502	2.59416	0.047834	6.28338	0.003485
UCHL5_HUMAN	36	42	WSLEPEN	5	874.394	UCH37_DEUBAD UbPG plus Ub	60	877.748	0.020892	2.76419	0.04306	6.28454	0.002175
UCHL5_HUMAN	36	42	WSLEPEN	5	874.394	UCH37_DEUBAD UbPG plus Ub	120	877.805	0.015969	2.82123	0.040899	6.2827	0.002579
UCHL5_HUMAN	36	42	WSLEPEN	5	874.394	UCH37_DEUBAD_UbPG	0	874.984	0.037652	0	0	6.2989	0.01561
UCHL5_HUMAN	36	42	WSLEPEN	5	874.394	UCH37_DEUBAD_UbPG	1	877.046	0.020651	2.06233	0.042944	6.29416	0.012932
UCHL5_HUMAN	36	42	WSLEPEN	5	874.394	UCH37_DEUBAD_UbPG	10	877.344	0.04217	2.36004	0.056533	6.29309	0.011173
UCHL5_HUMAN	36	42	WSLEPEN	5	874.394	UCH37_DEUBAD_UbPG	30	877.647	0.030495	2.66266	0.048453	6.29041	0.011152
UCHL5_HUMAN	36	42	WSLEPEN	5	874.394	UCH37_DEUBAD_UbPG	60	877.806	0.043352	2.82192	0.05742	6.29051	0.013869
UCHL5_HUMAN	36	42	WSLEPEN	5	874.394	UCH37_DEUBAD_UbPG	120	877.894	0.044254	2.91003	0.058105	6.29095	0.015847
UCHL5_HUMAN	36	42	WSLEPEN	5	874.394	UCH37_DEUBAD_UbPG plus K48 Ub2	0	874.984	0.037652	0	0	6.2989	0.01561
UCHL5_HUMAN	36	42	WSLEPEN	5	874.394	UCH37_DEUBAD_UbPG plus K48 Ub2	1	877.09	0.043395	2.10607	0.057453	6.30381	0.009248
UCHL5_HUMAN	36	42	WSLEPEN	5	874.394	UCH37_DEUBAD_UbPG plus K48 Ub2	10	877.362	0.047905	2.37761	0.060931	6.29596	0.012251
UCHL5_HUMAN	36	42	WSLEPEN	5	874.394	UCH37_DEUBAD_UbPG plus K48 Ub2	30	877.656	0.050001	2.67225	0.062593	6.29332	0.006583
UCHL5_HUMAN	36	42	WSLEPEN	5	874.394	UCH37_DEUBAD_UbPG plus K48 Ub2	60	877.822	0.040836	2.83753	0.055546	6.29079	0.00835
UCHL5_HUMAN	36	42	WSLEPEN	5	874.394	UCH37_DEUBAD_UbPG plus K48 Ub2	120	877.875	0.051841	2.89073	0.064072	6.29214	0.010271
UCHL5_HUMAN	36	43	WSLEPENF	6	1021.46	UCH37_DEUBAD UbPG plus K6/48 Ub3	0	1022.16	0.108281	0	0	7.61663	0.013798
UCHL5_HUMAN	36	43	WSLEPENF	6	1021.46	UCH37_DEUBAD UbPG plus K6/48 Ub3	1	1024.53	0.025633	2.3727	0.111274	7.53385	0.007502
UCHL5_HUMAN	36	43	WSLEPENF	6	1021.46	UCH37_DEUBAD UbPG plus K6/48 Ub3	10	1025.08	0.03189	2.92216	0.11288	7.53552	0.007792
UCHL5_HUMAN	36	43	WSLEPENF	6	1021.46	UCH37_DEUBAD UbPG plus K6/48 Ub3	30	1025.34	0.055379	3.18486	0.121621	7.53718	0.006522
UCHL5_HUMAN	36	43	WSLEPENF	6	1021.46	UCH37_DEUBAD UbPG plus K6/48 Ub3	60	1025.52	0.055154	3.36637	0.121519	7.53565	0.005998
UCHL5_HUMAN	36	43	WSLEPENF	6	1021.46	UCH37_DEUBAD UbPG plus K6/48 Ub3	120	1025.58	0.05623	3.42271	0.122011	7.53864	0.006134
UCHL5_HUMAN	36	43	WSLEPENF	6	1021.46	UCH37_DEUBAD UbPG plus Ub	0	1022.16	0.108281	0	0	7.61663	0.013798
UCHL5_HUMAN	36	43	WSLEPENF	6	1021.46	UCH37_DEUBAD UbPG plus Ub	1	1024.55	0.033761	2.38814	0.113423	7.59771	0.005462
UCHL5_HUMAN	36	43	WSLEPENF	6	1021.46	UCH37_DEUBAD UbPG plus Ub	10	1025.08	0.046132	2.91868	0.117699	7.59654	0.004443
UCHL5_HUMAN	36	43	WSLEPENF	6	1021.46	UCH37_DEUBAD UbPG plus Ub	30	1025.36	0.06769	3.20345	0.127698	7.59489	0.003928
UCHL5_HUMAN	36	43	WSLEPENF	6	1021.46	UCH37_DEUBAD UbPG plus Ub	60	1025.53	0.07365	3.37425	0.130955	7.59446	0.005257
UCHL5_HUMAN	36	43	WSLEPENF	6	1021.46	UCH37_DEUBAD UbPG plus Ub	120	1025.58	0.065406	3.42427	0.126502	7.59351	0.003868
UCHL5_HUMAN	36	43	WSLEPENF	6	1021.46	UCH37_DEUBAD_UbPG	0	1022.16	0.108281	0	0	7.61663	0.013798
UCHL5_HUMAN	36	43	WSLEPENF	6	1021.46	UCH37_DEUBAD_UbPG	1	1024.53	0.026903	2.36858	0.111573	7.61062	0.013535
UCHL5_HUMAN	36	43	WSLEPENF	6	1021.46	UCH37_DEUBAD_UbPG	10	1025.1	0.038153	2.93903	0.114806	7.60895	0.011918
UCHL5_HUMAN	36	43	WSLEPENF	6	1021.46	UCH37_DEUBAD_UbPG	30	1025.43	0.072129	3.26707	0.130105	7.60579	0.013
UCHL5_HUMAN	36	43	WSLEPENF	6	1021.46	UCH37_DEUBAD_UbPG	60	1025.58	0.069046	3.42481	0.128422	7.60538	0.014047
UCHL5_HUMAN	36	43	WSLEPENF	6	1021.46	UCH37_DEUBAD_UbPG	120	1025.66	0.082262	3.50559	0.135985	7.60668	0.014065
UCHL5_HUMAN	36	43	WSLEPENF	6	1021.46	UCH37_DEUBAD_UbPG plus K48 Ub2	0	1022.16	0.108281	0	0	7.61663	0.013798
UCHL5_HUMAN	36	43	WSLEPENF	6	1021.46	UCH37_DEUBAD_UbPG plus K48 Ub2	1	1024.57	0.044536	2.41457	0.117083	7.61535	0.013564
UCHL5_HUMAN	36	43	WSLEPENF	6	1021.46	UCH37_DEUBAD_UbPG plus K48 Ub2	10	1025.13	0.062969	2.96851	0.12526	7.6103	0.01468
UCHL5_HUMAN	36	43	WSLEPENF	6	1021.46	UCH37_DEUBAD_UbPG plus K48 Ub2	30	1025.38	0.079668	3.22237	0.134431	7.60991	0.011105
UCHL5_HUMAN	36	43	WSLEPENF	6	1021.46	UCH37_DEUBAD_UbPG plus K48 Ub2	60	1025.54	0.086843	3.38471	0.138804	7.60579	0.011401
UCHL5_HUMAN	36	43	WSLEPENF	6	1021.46	UCH37_DEUBAD_UbPG plus K48 Ub2	120	1025.6	0.078801	3.44093	0.133919	7.60641	0.012212
UCHL5_HUMAN	37	43	SLEPENF	5	835.383	UCH37_DEUBAD UbPG plus K6/48 Ub3	0	835.869	0.018201	0	0	6.10571	0.016387
UCHL5_HUMAN	37	43	SLEPENF	5	835.383	UCH37_DEUBAD UbPG plus K6/48 Ub3	1	837.563	0.043007	1.69319	0.0467	6.05519	0.006066
UCHL5_HUMAN	37	43	SLEPENF	5	835.383	UCH37_DEUBAD UbPG plus K6/48 Ub3	10	838.076	0.043624	2.20647	0.047269	6.04912	0.002236
UCHL5_HUMAN	37	43	SLEPENF	5	835.383	UCH37_DEUBAD UbPG plus K6/48 Ub3	30	838.335	0.037339	2.46602	0.041539	6.04892	0.003483
UCHL5_HUMAN	37	43	SLEPENF	5	835.383	UCH37_DEUBAD UbPG plus K6/48 Ub3	60	838.514	0.028796	2.64404	0.034066	6.04883	0.003573
UCHL5_HUMAN	37	43	SLEPENF	5	835.383	UCH37_DEUBAD UbPG plus K6/48 Ub3	120	838.601	0.04645	2.7315	0.049889	6.05155	0.00219
UCHL5_HUMAN	37	43	SLEPENF	5	835.383	UCH37_DEUBAD UbPG plus Ub	0	835.869	0.018201	0	0	6.10571	0.016387
UCHL5_HUMAN	37	43	SLEPENF	5	835.383	UCH37_DEUBAD UbPG plus Ub	1	837.555	0.032573	1.68596	0.037313	6.09538	0.009089
UCHL5_HUMAN	37	43	SLEPENF	5	835.383	UCH37_DEUBAD UbPG plus Ub	10	838.059	0.016118	2.18914	0.024312	6.09491	0.002241
UCHL5_HUMAN	37	43	SLEPENF	5	835.383	UCH37_DEUBAD UbPG plus Ub	30	838.315	0.03109	2.4459	0.036026	6.09244	0.00362
UCHL5_HUMAN	37	43	SLEPENF	5	835.383	UCH37_DEUBAD UbPG plus Ub	60	838.474	0.034955	2.60403	0.03941	6.09265	0.002223
UCHL5_HUMAN	37	43	SLEPENF	5	835.383	UCH37_DEUBAD UbPG plus Ub	120	838.539	0.048249	2.66983	0.051568	6.09074	0.003195
UCHL5_HUMAN	37	43	SLEPENF	5	835.383	UCH37_DEUBAD_UbPG	0	835.869	0.018201	0	0	6.10571	0.016387
UCHL5_HUMAN	37	43	SLEPENF	5	835.383	UCH37_DEUBAD_UbPG	1	837.542	0.043539	1.67251	0.047191	6.09954	0.014056
UCHL5_HUMAN	37	43	SLEPENF	5	835.383	UCH37_DEUBAD_UbPG	10	838.058	0.027614	2.18893	0.033073	6.09918	0.011186
UCHL5_HUMAN	37	43	SLEPENF	5	835.383	UCH37_DEUBAD_UbPG	30	838.358	0.031639	2.48845	0.0365	6.09528	0.013262
UCHL5_HUMAN	37	43	SLEPENF	5	835.383	UCH37_DEUBAD_UbPG	60	838.5	0.036868	2.63075	0.041116	6.0967	0.014415
UCHL5_HUMAN	37	43	SLEPENF	5	835.383	UCH37_DEUBAD_UbPG	120	838.586	0.033973	2.71677	0.038542	6.09621	0.015575
UCHL5_HUMAN	37	43	SLEPENF	5	835.383	UCH37_DEUBAD_UbPG plus K48 Ub2	0	835.869	0.018201	0	0	6.10571	0.016387
UCHL5_HUMAN	37	43	SLEPENF	5	835.383	UCH37_DEUBAD_UbPG plus K48 Ub2	1	837.613	0.059093	1.74374	0.061832	6.11047	0.010567
UCHL5_HUMAN	37	43	SLEPENF	5	835.383	UCH37_DEUBAD_UbPG plus K48 Ub2	10	838.108	0.042583	2.23878	0.046309	6.10183	0.012187
UCHL5_HUMAN	37	43	SLEPENF	5	835.383	UCH37_DEUBAD_UbPG plus K48 Ub2	30	838.345	0.035348	2.47544	0.039759	6.10038	0.006893
UCHL5_HUMAN	37	43	SLEPENF	5	835.383	UCH37_DEUBAD_UbPG plus K48 Ub2	60	838.505	0.039423	2.63571	0.043422	6.09821	0.008386
UCHL5_HUMAN	37	43	SLEPENF	5	835.383	UCH37_DEUBAD_UbPG plus K48 Ub2	120	838.556	0.045775	2.68636	0.049261	6.09958	0.010267
UCHL5_HUMAN	43	51	FEKLKPVHG	7	1054.6	UCH37_DEUBAD UbPG plus K6/48 Ub3	0	1055.1	0.006442	0	0	3.74896	0.034911
UCHL5_HUMAN	43	51	FEKLKPVHG	7	1054.6	UCH37_DEUBAD UbPG plus K6/48 Ub3	1	1056.75	0.086727	1.65079	0.086966	3.67079	0.004322
UCHL5_HUMAN	43	51	FEKLKPVHG	7	1054.6	UCH37_DEUBAD UbPG plus K6/48 Ub3	10	1058.11	0.009548	3.00914	0.011518	3.66606	0.004413
UCHL5_HUMAN	43	51	FEKLKPVHG	7	1054.6	UCH37_DEUBAD UbPG plus K6/48 Ub3	30	1058.23	0.018603	3.12125	0.019687	3.66635	0.003622
UCHL5_HUMAN	43	51	FEKLKPVHG	7	1054.6	UCH37_DEUBAD UbPG plus K6/48 Ub3	60	1058.27	0.023867	3.17083	0.024721	3.66941	0.001539
UCHL5_HUMAN	43	51	FEKLKPVHG	7	1054.6	UCH37_DEUBAD UbPG plus K6/48 Ub3	120	1058.26	0.032975	3.15981	0.033599	3.67011	0.002411
UCHL5_HUMAN	43	51	FEKLKPVHG	7	1054.6	UCH37_DEUBAD UbPG plus Ub	0	1055.1	0.006442	0	0	3.74896	0.034911
UCHL5_HUMAN	43	51	FEKLKPVHG	7	1054.6	UCH37_DEUBAD UbPG plus Ub	1	1056.75	0.011004	1.65059	0.012751	3.72609	0.005827
UCHL5_HUMAN	43	51	FEKLKPVHG	7	1054.6	UCH37_DEUBAD UbPG plus Ub	10	1058.03	0.073233	2.92507	0.073516	3.72543	0.002619
UCHL5_HUMAN	43	51	FEKLKPVHG	7	1054.6	UCH37_DEUBAD UbPG plus Ub	30	1058.15	0.019528	3.04985	0.020563	3.72678	0.004043
UCHL5_HUMAN	43	51	FEKLKPVHG	7	1054.6	UCH37_DEUBAD UbPG plus Ub	60	1058.17	0.073219	3.06332	0.073502	3.7226	0.004269
UCHL5_HUMAN	43	51	FEKLKPVHG	7	1054.6	UCH37_DEUBAD UbPG plus Ub	120	1058.16	0.017152	3.05373	0.018321	3.72112	0.002603
UCHL5_HUMAN	43	51	FEKLKPVHG	7	1054.6	UCH37_DEUBAD_UbPG	0	1055.1	0.006442	0	0	3.74896	0.034911
UCHL5_HUMAN	43	51	FEKLKPVHG	7	1054.6	UCH37_DEUBAD_UbPG	1	1056.66	0.074142	1.55242	0.074422	3.74714	0.03
UCHL5_HUMAN	43	51	FEKLKPVHG	7	1054.6	UCH37_DEUBAD_UbPG	10	1057.96	0.006479	2.85927	0.009137	3.74575	0.028856
UCHL5_HUMAN	43	51	FEKLKPVHG	7	1054.6	UCH37_DEUBAD_UbPG	30	1058.12	0.00379	3.01849	0.007474	3.7458	0.027258
UCHL5_HUMAN	43	51	FEKLKPVHG	7	1054.6	UCH37_DEUBAD_UbPG	60	1058.12	0.011652	3.01216	0.013314	3.74711	0.027947
UCHL5_HUMAN	43	51	FEKLKPVHG	7	1054.6	UCH37_DEUBAD_UbPG	120	1058.11	0.052783	3.00643	0.053174	3.74571	0.030745
UCHL5_HUMAN	43	51	FEKLKPVHG	7	1054.6	UCH37_DEUBAD_UbPG plus K48 Ub2	0	1055.1	0.006442	0	0	3.74896	0.034911
UCHL5_HUMAN	43	51	FEKLKPVHG	7	1054.6	UCH37_DEUBAD_UbPG plus K48 Ub2	1	1056.79	0.059506	1.69071	0.059854	3.76131	0.027725
UCHL5_HUMAN	43	51	FEKLKPVHG	7	1054.6	UCH37_DEUBAD_UbPG plus K48 Ub2	10	1058.06	0.034476	2.95743	0.035072	3.75472	0.029348
UCHL5_HUMAN	43	51	FEKLKPVHG	7	1054.6	UCH37_DEUBAD_UbPG plus K48 Ub2	30	1058.19	0.058372	3.09046	0.058727	3.75691	0.024403
UCHL5_HUMAN	43	51	FEKLKPVHG	7	1054.6	UCH37_DEUBAD_UbPG plus K48 Ub2	60	1058.27	0.004586	3.16996	0.007907	3.75448	0.027527
UCHL5_HUMAN	43	51	FEKLKPVHG	7	1054.6	UCH37_DEUBAD_UbPG plus K48 Ub2	120	1058.23	0.056534	3.12404	0.0569	3.75191	0.026422
UCHL5_HUMAN	43	52	FEKLKPVHGL	8	1167.69	UCH37_DEUBAD UbPG plus K6/48 Ub3	0	1168.51	0.118023	0	0	4.96521	0.042041
UCHL5_HUMAN	43	52	FEKLKPVHGL	8	1167.69	UCH37_DEUBAD UbPG plus K6/48 Ub3	1	1170.14	0.050616	1.62688	0.128419	4.83991	0.005513
UCHL5_HUMAN	43	52	FEKLKPVHGL	8	1167.69	UCH37_DEUBAD UbPG plus K6/48 Ub3	10	1171.53	0.025433	3.02345	0.120733	4.83674	0.003259
UCHL5_HUMAN	43	52	FEKLKPVHGL	8	1167.69	UCH37_DEUBAD UbPG plus K6/48 Ub3	30	1171.74	0.032229	3.23361	0.122345	4.83936	0.00423
UCHL5_HUMAN	43	52	FEKLKPVHGL	8	1167.69	UCH37_DEUBAD UbPG plus K6/48 Ub3	60	1171.75	0.028314	3.23986	0.121372	4.83822	0.001771
UCHL5_HUMAN	43	52	FEKLKPVHGL	8	1167.69	UCH37_DEUBAD UbPG plus K6/48 Ub3	120	1171.73	0.025688	3.2261	0.120787	4.84117	0.001478
UCHL5_HUMAN	43	52	FEKLKPVHGL	8	1167.69	UCH37_DEUBAD UbPG plus Ub	0	1168.51	0.118023	0	0	4.96521	0.042041
UCHL5_HUMAN	43	52	FEKLKPVHGL	8	1167.69	UCH37_DEUBAD UbPG plus Ub	1	1170.27	0.037327	1.75912	0.123785	4.9166	0.007905
UCHL5_HUMAN	43	52	FEKLKPVHGL	8	1167.69	UCH37_DEUBAD UbPG plus Ub	10	1171.65	0.050753	3.14464	0.128473	4.91554	0.000102
UCHL5_HUMAN	43	52	FEKLKPVHGL	8	1167.69	UCH37_DEUBAD UbPG plus Ub	30	1171.76	0.027917	3.25263	0.12128	4.9172	0.003766
UCHL5_HUMAN	43	52	FEKLKPVHGL	8	1167.69	UCH37_DEUBAD UbPG plus Ub	60	1171.76	0.244977	3.25416	0.271925	4.91453	0.004279
UCHL5_HUMAN	43	52	FEKLKPVHGL	8	1167.69	UCH37_DEUBAD UbPG plus Ub	120	1171.76	0.053296	3.25176	0.129499	4.91369	0.001604
UCHL5_HUMAN	43	52	FEKLKPVHGL	8	1167.69	UCH37_DEUBAD_UbPG	0	1168.51	0.118023	0	0	4.96521	0.042041
UCHL5_HUMAN	43	52	FEKLKPVHGL	8	1167.69	UCH37_DEUBAD_UbPG	1	1170.24	0.053593	1.73211	0.129622	4.95472	0.043396
UCHL5_HUMAN	43	52	FEKLKPVHGL	8	1167.69	UCH37_DEUBAD_UbPG	10	1171.6	0.010599	3.09047	0.118498	4.95295	0.040918
UCHL5_HUMAN	43	52	FEKLKPVHGL	8	1167.69	UCH37_DEUBAD_UbPG	30	1171.78	0.031191	3.26653	0.122076	4.95143	0.040921
UCHL5_HUMAN	43	52	FEKLKPVHGL	8	1167.69	UCH37_DEUBAD_UbPG	60	1171.73	0.261391	3.22018	0.286801	4.94409	0.043051
UCHL5_HUMAN	43	52	FEKLKPVHGL	8	1167.69	UCH37_DEUBAD_UbPG	120	1171.74	0.347747	3.23545	0.36723	4.95405	0.042061
UCHL5_HUMAN	43	52	FEKLKPVHGL	8	1167.69	UCH37_DEUBAD_UbPG plus K48 Ub2	0	1168.51	0.118023	0	0	4.96521	0.042041
UCHL5_HUMAN	43	52	FEKLKPVHGL	8	1167.69	UCH37_DEUBAD_UbPG plus K48 Ub2	1	1170.35	0.107756	1.83723	0.159815	4.97252	0.037102
UCHL5_HUMAN	43	52	FEKLKPVHGL	8	1167.69	UCH37_DEUBAD_UbPG plus K48 Ub2	10	1171.7	0.053995	3.18968	0.129788	4.96331	0.040083
UCHL5_HUMAN	43	52	FEKLKPVHGL	8	1167.69	UCH37_DEUBAD_UbPG plus K48 Ub2	30	1171.8	0.047724	3.29115	0.127307	4.96205	0.033715
UCHL5_HUMAN	43	52	FEKLKPVHGL	8	1167.69	UCH37_DEUBAD_UbPG plus K48 Ub2	60	1171.86	0.075491	3.3563	0.140102	4.95453	0.03783
UCHL5_HUMAN	43	52	FEKLKPVHGL	8	1167.69	UCH37_DEUBAD_UbPG plus K48 Ub2	120	1171.84	0.056966	3.32809	0.131052	4.95827	0.038725
UCHL5_HUMAN	43	54	FEKLKPVHGLIF	10	1427.84	UCH37_DEUBAD UbPG plus K6/48 Ub3	0	1429.13	0.471577	0	0	6.32459	0.264484
UCHL5_HUMAN	43	54	FEKLKPVHGLIF	10	1427.84	UCH37_DEUBAD UbPG plus K6/48 Ub3	1	1430.44	0.09923	1.30437	0.481903	6.2926	0.008175
UCHL5_HUMAN	43	54	FEKLKPVHGLIF	10	1427.84	UCH37_DEUBAD UbPG plus K6/48 Ub3	10	1431.73	0.165727	2.5912	0.49985	6.28617	0.003633
UCHL5_HUMAN	43	54	FEKLKPVHGLIF	10	1427.84	UCH37_DEUBAD UbPG plus K6/48 Ub3	30	1431.9	0.061869	2.7664	0.475618	6.28811	0.002961
UCHL5_HUMAN	43	54	FEKLKPVHGLIF	10	1427.84	UCH37_DEUBAD UbPG plus K6/48 Ub3	60	1431.9	0.057999	2.76304	0.47513	6.28808	0.00297
UCHL5_HUMAN	43	54	FEKLKPVHGLIF	10	1427.84	UCH37_DEUBAD UbPG plus K6/48 Ub3	120	1431.93	0.089716	2.80055	0.480035	6.29236	0.002247
UCHL5_HUMAN	43	54	FEKLKPVHGLIF	10	1427.84	UCH37_DEUBAD UbPG plus Ub	0	1428.95	0.211054	0	0	6.35136	0.2339
UCHL5_HUMAN	43	54	FEKLKPVHGLIF	10	1427.84	UCH37_DEUBAD UbPG plus Ub	1	1430.33	0.293556	1.38643	0.361551	6.39956	0.001899
UCHL5_HUMAN	43	54	FEKLKPVHGLIF	10	1427.84	UCH37_DEUBAD UbPG plus Ub	10	1431.77	0.082596	2.82315	0.22664	6.39154	0.001598
UCHL5_HUMAN	43	54	FEKLKPVHGLIF	10	1427.84	UCH37_DEUBAD UbPG plus Ub	30	1431.88	0.160502	2.92796	0.265151	6.38792	0.004531
UCHL5_HUMAN	43	54	FEKLKPVHGLIF	10	1427.84	UCH37_DEUBAD UbPG plus Ub	60	1431.86	0.199987	2.91351	0.290755	6.3888	0.004049
UCHL5_HUMAN	43	54	FEKLKPVHGLIF	10	1427.84	UCH37_DEUBAD UbPG plus Ub	120	1431.87	0.205389	2.92052	0.294497	6.38533	0.002788
UCHL5_HUMAN	43	54	FEKLKPVHGLIF	10	1427.84	UCH37_DEUBAD_UbPG	0	1428.99	0.187788	0	0	6.45239	0.052415
UCHL5_HUMAN	43	54	FEKLKPVHGLIF	10	1427.84	UCH37_DEUBAD_UbPG	1	1430.5	0.105357	1.50523	0.215324	6.38178	4.05269e-05
UCHL5_HUMAN	43	54	FEKLKPVHGLIF	10	1427.84	UCH37_DEUBAD_UbPG	10	1431.78	0.039577	2.78726	0.191913	6.44026	0.049415
UCHL5_HUMAN	43	54	FEKLKPVHGLIF	10	1427.84	UCH37_DEUBAD_UbPG	30	1431.94	0.056409	2.94521	0.196077	6.42418	0.050111
UCHL5_HUMAN	43	54	FEKLKPVHGLIF	10	1427.84	UCH37_DEUBAD_UbPG	60	1431.92	0.051675	2.93141	0.194768	6.38353	5.64302e-05
UCHL5_HUMAN	43	54	FEKLKPVHGLIF	10	1427.84	UCH37_DEUBAD_UbPG	120	1431.95	0.056594	2.95772	0.19613	6.4256	0.052363
UCHL5_HUMAN	43	54	FEKLKPVHGLIF	10	1427.84	UCH37_DEUBAD_UbPG plus K48 Ub2	0	1429.08	0.158358	0	0	6.43731	0.056548
UCHL5_HUMAN	43	54	FEKLKPVHGLIF	10	1427.84	UCH37_DEUBAD_UbPG plus K48 Ub2	1	1430.51	0.089195	1.42689	0.18175	6.38877	0.002116
UCHL5_HUMAN	43	54	FEKLKPVHGLIF	10	1427.84	UCH37_DEUBAD_UbPG plus K48 Ub2	10	1431.83	0.078798	2.74738	0.17688	6.37646	0.002636
UCHL5_HUMAN	43	54	FEKLKPVHGLIF	10	1427.84	UCH37_DEUBAD_UbPG plus K48 Ub2	30	1431.98	0.089286	2.89661	0.181795	6.38478	0.002754
UCHL5_HUMAN	43	54	FEKLKPVHGLIF	10	1427.84	UCH37_DEUBAD_UbPG plus K48 Ub2	60	1432.02	0.05654	2.93889	0.168149	6.42194	0.048454
UCHL5_HUMAN	43	54	FEKLKPVHGLIF	10	1427.84	UCH37_DEUBAD_UbPG plus K48 Ub2	120	1432	0.08772	2.92134	0.181031	6.37665	0.001884
UCHL5_HUMAN	43	55	FEKLKPVHGLIFL	11	1540.92	UCH37_DEUBAD UbPG plus K6/48 Ub3	0	1542.21	0.326667	0	0	7.06181	0.098904
UCHL5_HUMAN	43	55	FEKLKPVHGLIFL	11	1540.92	UCH37_DEUBAD UbPG plus K6/48 Ub3	1	1543.53	0.157456	1.32039	0.362634	6.82991	0.0098
UCHL5_HUMAN	43	55	FEKLKPVHGLIFL	11	1540.92	UCH37_DEUBAD UbPG plus K6/48 Ub3	10	1544.83	0.053469	2.61568	0.331014	6.82638	0.003453
UCHL5_HUMAN	43	55	FEKLKPVHGLIFL	11	1540.92	UCH37_DEUBAD UbPG plus K6/48 Ub3	30	1545	0.072335	2.78683	0.33458	6.83016	0.006857
UCHL5_HUMAN	43	55	FEKLKPVHGLIFL	11	1540.92	UCH37_DEUBAD UbPG plus K6/48 Ub3	60	1545.02	0.09988	2.80647	0.341595	6.83272	0.003277
UCHL5_HUMAN	43	55	FEKLKPVHGLIFL	11	1540.92	UCH37_DEUBAD UbPG plus K6/48 Ub3	120	1545.01	0.25677	2.79671	0.415502	6.83545	0.004779
UCHL5_HUMAN	43	55	FEKLKPVHGLIFL	11	1540.92	UCH37_DEUBAD UbPG plus Ub	0	1542.5	0.039439	0	0	7.00865	0.054019
UCHL5_HUMAN	43	55	FEKLKPVHGLIFL	11	1540.92	UCH37_DEUBAD UbPG plus Ub	1	1543.65	0.008428	1.14563	0.04033	6.93988	0.011198
UCHL5_HUMAN	43	55	FEKLKPVHGLIFL	11	1540.92	UCH37_DEUBAD UbPG plus Ub	10	1544.89	0.015107	2.38349	0.042233	6.93867	0.003904
UCHL5_HUMAN	43	55	FEKLKPVHGLIFL	11	1540.92	UCH37_DEUBAD UbPG plus Ub	30	1545	0.007567	2.50179	0.040158	6.93914	0.003368
UCHL5_HUMAN	43	55	FEKLKPVHGLIFL	11	1540.92	UCH37_DEUBAD UbPG plus Ub	60	1545.12	0.130157	2.61916	0.136001	6.93823	0.004316
UCHL5_HUMAN	43	55	FEKLKPVHGLIFL	11	1540.92	UCH37_DEUBAD UbPG plus Ub	120	1545.1	0.109308	2.59869	0.116205	6.93567	0.004365
UCHL5_HUMAN	43	55	FEKLKPVHGLIFL	11	1540.92	UCH37_DEUBAD_UbPG	0	1542.22	0.329177	0	0	7.04616	0.002882
UCHL5_HUMAN	43	55	FEKLKPVHGLIFL	11	1540.92	UCH37_DEUBAD_UbPG	1	1543.6	0.157711	1.3805	0.365007	7.02054	0.047838
UCHL5_HUMAN	43	55	FEKLKPVHGLIFL	11	1540.92	UCH37_DEUBAD_UbPG	10	1544.9	0.102396	2.68592	0.344735	7.04793	0.020668
UCHL5_HUMAN	43	55	FEKLKPVHGLIFL	11	1540.92	UCH37_DEUBAD_UbPG	30	1545.09	0.086484	2.87331	0.340348	6.99199	0.057372
UCHL5_HUMAN	43	55	FEKLKPVHGLIFL	11	1540.92	UCH37_DEUBAD_UbPG	60	1545.11	0.098386	2.89344	0.343565	6.99336	0.058974
UCHL5_HUMAN	43	55	FEKLKPVHGLIFL	11	1540.92	UCH37_DEUBAD_UbPG	120	1545.08	0.104924	2.86515	0.345494	7.05274	0.001532
UCHL5_HUMAN	43	55	FEKLKPVHGLIFL	11	1540.92	UCH37_DEUBAD_UbPG plus K48 Ub2	0	1542.28	0.32033	0	0	7.02197	0.048235
UCHL5_HUMAN	43	55	FEKLKPVHGLIFL	11	1540.92	UCH37_DEUBAD_UbPG plus K48 Ub2	1	1543.76	0.117592	1.48343	0.341232	7.01161	0.050291
UCHL5_HUMAN	43	55	FEKLKPVHGLIFL	11	1540.92	UCH37_DEUBAD_UbPG plus K48 Ub2	10	1545.06	0.101786	2.77594	0.336113	6.9945	0.052438
UCHL5_HUMAN	43	55	FEKLKPVHGLIFL	11	1540.92	UCH37_DEUBAD_UbPG plus K48 Ub2	30	1545.11	0.068923	2.82983	0.327661	6.99046	0.042867
UCHL5_HUMAN	43	55	FEKLKPVHGLIFL	11	1540.92	UCH37_DEUBAD_UbPG plus K48 Ub2	60	1545.15	0.086588	2.86791	0.331827	6.99186	0.048829
UCHL5_HUMAN	43	55	FEKLKPVHGLIFL	11	1540.92	UCH37_DEUBAD_UbPG plus K48 Ub2	120	1545.18	0.11044	2.90089	0.338834	6.98896	0.052511
UCHL5_HUMAN	44	52	EKLKPVHGL	7	1020.62	UCH37_DEUBAD UbPG plus K6/48 Ub3	0	1021.12	0.066012	0	0	4.10536	0.055217
UCHL5_HUMAN	44	52	EKLKPVHGL	7	1020.62	UCH37_DEUBAD UbPG plus K6/48 Ub3	1	1022.3	1.13687e-13	1.1844	0.066012	4.00597	0
UCHL5_HUMAN	44	52	EKLKPVHGL	7	1020.62	UCH37_DEUBAD UbPG plus K6/48 Ub3	10	1023.78	0.034551	2.66154	0.074507	4.83857	0.00284
UCHL5_HUMAN	44	52	EKLKPVHGL	7	1020.62	UCH37_DEUBAD UbPG plus K6/48 Ub3	30	1023.83	0	2.70906	0.066012	4.00185	0
UCHL5_HUMAN	44	52	EKLKPVHGL	7	1020.62	UCH37_DEUBAD UbPG plus K6/48 Ub3	60	1023.9	0.074294	2.78135	0.099384	4.10313	0.27547
UCHL5_HUMAN	44	52	EKLKPVHGL	7	1020.62	UCH37_DEUBAD UbPG plus K6/48 Ub3	120	1023.87	0.020553	2.75211	0.069137	4.00113	0.001617
UCHL5_HUMAN	44	52	EKLKPVHGL	7	1020.62	UCH37_DEUBAD UbPG plus Ub	0	1021.12	0.066012	0	0	4.10536	0.055217
UCHL5_HUMAN	44	52	EKLKPVHGL	7	1020.62	UCH37_DEUBAD UbPG plus Ub	1	1022.48	0.076238	1.36192	0.100845	4.07329	0.005111
UCHL5_HUMAN	44	52	EKLKPVHGL	7	1020.62	UCH37_DEUBAD UbPG plus Ub	10	1023.76	0.067943	2.63926	0.09473	4.073	0.002863
UCHL5_HUMAN	44	52	EKLKPVHGL	7	1020.62	UCH37_DEUBAD UbPG plus Ub	30	1023.92	0.009925	2.79694	0.066754	4.07005	0.005854
UCHL5_HUMAN	44	52	EKLKPVHGL	7	1020.62	UCH37_DEUBAD UbPG plus Ub	60	1023.9	0.03097	2.78159	0.072916	4.06742	0.002179
UCHL5_HUMAN	44	52	EKLKPVHGL	7	1020.62	UCH37_DEUBAD UbPG plus Ub	120	1023.98	0.026321	2.86129	0.071066	4.06518	0.002731
UCHL5_HUMAN	44	52	EKLKPVHGL	7	1020.62	UCH37_DEUBAD_UbPG	0	1021.12	0.066012	0	0	4.10536	0.055217
UCHL5_HUMAN	44	52	EKLKPVHGL	7	1020.62	UCH37_DEUBAD_UbPG	1	1022.44	0.150335	1.31662	0.164189	4.09875	0.044565
UCHL5_HUMAN	44	52	EKLKPVHGL	7	1020.62	UCH37_DEUBAD_UbPG	10	1023.71	0.110322	2.58807	0.128563	4.09889	0.045258
UCHL5_HUMAN	44	52	EKLKPVHGL	7	1020.62	UCH37_DEUBAD_UbPG	30	1023.93	0.183279	2.80795	0.194804	4.09284	0.049499
UCHL5_HUMAN	44	52	EKLKPVHGL	7	1020.62	UCH37_DEUBAD_UbPG	60	1023.85	0.134404	2.73332	0.14974	4.0979	0.047977
UCHL5_HUMAN	44	52	EKLKPVHGL	7	1020.62	UCH37_DEUBAD_UbPG	120	1023.91	0.067759	2.79221	0.094598	4.09718	0.048171
UCHL5_HUMAN	44	52	EKLKPVHGL	7	1020.62	UCH37_DEUBAD_UbPG plus K48 Ub2	0	1021.12	0.066012	0	0	4.10536	0.055217
UCHL5_HUMAN	44	52	EKLKPVHGL	7	1020.62	UCH37_DEUBAD_UbPG plus K48 Ub2	1	1022.41	0.077334	1.28759	0.101676	4.13049	0.047274
UCHL5_HUMAN	44	52	EKLKPVHGL	7	1020.62	UCH37_DEUBAD_UbPG plus K48 Ub2	10	1023.77	0.082639	2.64642	0.105767	4.11772	0.047987
UCHL5_HUMAN	44	52	EKLKPVHGL	7	1020.62	UCH37_DEUBAD_UbPG plus K48 Ub2	30	1023.9	0.094406	2.78009	0.115196	4.11787	0.041808
UCHL5_HUMAN	44	52	EKLKPVHGL	7	1020.62	UCH37_DEUBAD_UbPG plus K48 Ub2	60	1023.98	0.065335	2.85573	0.092878	4.11099	0.041282
UCHL5_HUMAN	44	52	EKLKPVHGL	7	1020.62	UCH37_DEUBAD_UbPG plus K48 Ub2	120	1023.9	0.120371	2.78519	0.137283	4.11386	0.042958
UCHL5_HUMAN	44	54	EKLKPVHGLIF	9	1280.77	UCH37_DEUBAD UbPG plus K6/48 Ub3	0	1281.75	0.099821	0	0	6.03218	0.062488
UCHL5_HUMAN	44	54	EKLKPVHGLIF	9	1280.77	UCH37_DEUBAD UbPG plus K6/48 Ub3	1	1282.61	0.04543	0.8657	0.109672	5.88725	0.010761
UCHL5_HUMAN	44	54	EKLKPVHGLIF	9	1280.77	UCH37_DEUBAD UbPG plus K6/48 Ub3	10	1283.89	0.014279	2.13991	0.100837	5.87542	0.002751
UCHL5_HUMAN	44	54	EKLKPVHGLIF	9	1280.77	UCH37_DEUBAD UbPG plus K6/48 Ub3	30	1284.06	0.022675	2.31177	0.102364	5.87891	0.003305
UCHL5_HUMAN	44	54	EKLKPVHGLIF	9	1280.77	UCH37_DEUBAD UbPG plus K6/48 Ub3	60	1284.09	0.022158	2.33961	0.10225	5.87897	0.004404
UCHL5_HUMAN	44	54	EKLKPVHGLIF	9	1280.77	UCH37_DEUBAD UbPG plus K6/48 Ub3	120	1284.09	0.012703	2.33727	0.100626	5.88434	0.002267
UCHL5_HUMAN	44	54	EKLKPVHGLIF	9	1280.77	UCH37_DEUBAD UbPG plus Ub	0	1281.75	0.099821	0	0	6.03218	0.062488
UCHL5_HUMAN	44	54	EKLKPVHGLIF	9	1280.77	UCH37_DEUBAD UbPG plus Ub	1	1282.7	0.05183	0.952718	0.112474	5.97803	0.013307
UCHL5_HUMAN	44	54	EKLKPVHGLIF	9	1280.77	UCH37_DEUBAD UbPG plus Ub	10	1283.97	0.017208	2.21912	0.101293	5.97028	0.003864
UCHL5_HUMAN	44	54	EKLKPVHGLIF	9	1280.77	UCH37_DEUBAD UbPG plus Ub	60	1284.1	0.033009	2.34745	0.105137	5.97226	0.002618
UCHL5_HUMAN	44	54	EKLKPVHGLIF	9	1280.77	UCH37_DEUBAD UbPG plus Ub	120	1284.1	0.059531	2.35503	0.116224	5.96826	0.004278
UCHL5_HUMAN	44	54	EKLKPVHGLIF	9	1280.77	UCH37_DEUBAD_UbPG	0	1281.75	0.099821	0	0	6.03218	0.062488
UCHL5_HUMAN	44	54	EKLKPVHGLIF	9	1280.77	UCH37_DEUBAD_UbPG	1	1282.67	0.058995	0.925797	0.115951	6.03515	0.058959
UCHL5_HUMAN	44	54	EKLKPVHGLIF	9	1280.77	UCH37_DEUBAD_UbPG	10	1283.92	0.029828	2.17447	0.104182	6.03232	0.05556
UCHL5_HUMAN	44	54	EKLKPVHGLIF	9	1280.77	UCH37_DEUBAD_UbPG	30	1284.07	0.011672	2.32479	0.100501	6.0336	0.056047
UCHL5_HUMAN	44	54	EKLKPVHGLIF	9	1280.77	UCH37_DEUBAD_UbPG	60	1284.09	0.018034	2.34415	0.101436	6.03205	0.058428
UCHL5_HUMAN	44	54	EKLKPVHGLIF	9	1280.77	UCH37_DEUBAD_UbPG	120	1284.08	0.003667	2.3279	0.099888	6.03623	0.062507
UCHL5_HUMAN	44	54	EKLKPVHGLIF	9	1280.77	UCH37_DEUBAD_UbPG plus K48 Ub2	0	1281.75	0.099821	0	0	6.03218	0.062488
UCHL5_HUMAN	44	54	EKLKPVHGLIF	9	1280.77	UCH37_DEUBAD_UbPG plus K48 Ub2	1	1282.8	0.148128	1.05591	0.178622	6.04572	0.051048
UCHL5_HUMAN	44	54	EKLKPVHGLIF	9	1280.77	UCH37_DEUBAD_UbPG plus K48 Ub2	10	1284.04	0.034433	2.29154	0.105592	6.03355	0.054316
UCHL5_HUMAN	44	54	EKLKPVHGLIF	9	1280.77	UCH37_DEUBAD_UbPG plus K48 Ub2	30	1284.1	0.023565	2.34904	0.102564	6.01885	0.048807
UCHL5_HUMAN	44	54	EKLKPVHGLIF	9	1280.77	UCH37_DEUBAD_UbPG plus K48 Ub2	60	1284.16	0.046486	2.41532	0.110114	6.03145	0.048274
UCHL5_HUMAN	44	54	EKLKPVHGLIF	9	1280.77	UCH37_DEUBAD_UbPG plus K48 Ub2	120	1284.17	0.064095	2.41942	0.118627	6.0316	0.05141
UCHL5_HUMAN	44	55	EKLKPVHGLIFL	10	1393.86	UCH37_DEUBAD UbPG plus K6/48 Ub3	0	1395	0.142145	0	0	6.74459	0.053111
UCHL5_HUMAN	44	55	EKLKPVHGLIFL	10	1393.86	UCH37_DEUBAD UbPG plus K6/48 Ub3	1	1395.82	0.013461	0.818289	0.14278	6.58524	0.006264
UCHL5_HUMAN	44	55	EKLKPVHGLIFL	10	1393.86	UCH37_DEUBAD UbPG plus K6/48 Ub3	10	1396.97	0.018939	1.96805	0.143401	6.57902	0.001909
UCHL5_HUMAN	44	55	EKLKPVHGLIFL	10	1393.86	UCH37_DEUBAD UbPG plus K6/48 Ub3	30	1397.17	0.013978	2.16695	0.14283	6.58234	0.002403
UCHL5_HUMAN	44	55	EKLKPVHGLIFL	10	1393.86	UCH37_DEUBAD UbPG plus K6/48 Ub3	60	1397.18	0.002728	2.17724	0.142171	6.58263	0.003466
UCHL5_HUMAN	44	55	EKLKPVHGLIFL	10	1393.86	UCH37_DEUBAD UbPG plus K6/48 Ub3	120	1397.18	0.012616	2.17638	0.142703	6.58568	0.001844
UCHL5_HUMAN	44	55	EKLKPVHGLIFL	10	1393.86	UCH37_DEUBAD UbPG plus Ub	0	1395	0.142145	0	0	6.74459	0.053111
UCHL5_HUMAN	44	55	EKLKPVHGLIFL	10	1393.86	UCH37_DEUBAD UbPG plus Ub	1	1395.64	0.014384	0.63493	0.14287	6.67948	0.010531
UCHL5_HUMAN	44	55	EKLKPVHGLIFL	10	1393.86	UCH37_DEUBAD UbPG plus Ub	10	1397.08	0.025832	2.07793	0.144473	6.6798	0.002491
UCHL5_HUMAN	44	55	EKLKPVHGLIFL	10	1393.86	UCH37_DEUBAD UbPG plus Ub	30	1397.16	0.029443	2.15169	0.145162	6.67729	0.006657
UCHL5_HUMAN	44	55	EKLKPVHGLIFL	10	1393.86	UCH37_DEUBAD UbPG plus Ub	60	1397.13	0.021135	2.1281	0.143707	6.67845	0.000193
UCHL5_HUMAN	44	55	EKLKPVHGLIFL	10	1393.86	UCH37_DEUBAD UbPG plus Ub	120	1397.12	0.036274	2.11207	0.1467	6.67572	0.000453
UCHL5_HUMAN	44	55	EKLKPVHGLIFL	10	1393.86	UCH37_DEUBAD_UbPG	0	1395	0.142145	0	0	6.74459	0.053111
UCHL5_HUMAN	44	55	EKLKPVHGLIFL	10	1393.86	UCH37_DEUBAD_UbPG	1	1395.8	0.085465	0.792752	0.165859	6.74662	0.052384
UCHL5_HUMAN	44	55	EKLKPVHGLIFL	10	1393.86	UCH37_DEUBAD_UbPG	10	1397.1	0.161883	2.09666	0.215433	6.75697	0.061072
UCHL5_HUMAN	44	55	EKLKPVHGLIFL	10	1393.86	UCH37_DEUBAD_UbPG	30	1397.15	0.04813	2.14985	0.150072	6.74245	0.051322
UCHL5_HUMAN	44	55	EKLKPVHGLIFL	10	1393.86	UCH37_DEUBAD_UbPG	60	1397.16	0.047712	2.15443	0.149938	6.74145	0.052867
UCHL5_HUMAN	44	55	EKLKPVHGLIFL	10	1393.86	UCH37_DEUBAD_UbPG	120	1397.19	0.049922	2.18638	0.150656	6.74177	0.054115
UCHL5_HUMAN	44	55	EKLKPVHGLIFL	10	1393.86	UCH37_DEUBAD_UbPG plus K48 Ub2	0	1395.05	0.250262	0	0	6.74748	0.052323
UCHL5_HUMAN	44	55	EKLKPVHGLIFL	10	1393.86	UCH37_DEUBAD_UbPG plus K48 Ub2	1	1396.04	0.09214	0.987188	0.266685	6.78509	0.001439
UCHL5_HUMAN	44	55	EKLKPVHGLIFL	10	1393.86	UCH37_DEUBAD_UbPG plus K48 Ub2	10	1397.27	0.08849	2.22089	0.265446	6.74445	0.051332
UCHL5_HUMAN	44	55	EKLKPVHGLIFL	10	1393.86	UCH37_DEUBAD_UbPG plus K48 Ub2	30	1397.23	0.042386	2.1787	0.253826	6.74537	0.044087
UCHL5_HUMAN	44	55	EKLKPVHGLIFL	10	1393.86	UCH37_DEUBAD_UbPG plus K48 Ub2	60	1397.32	0.087754	2.27103	0.265201	6.73915	0.048732
UCHL5_HUMAN	44	55	EKLKPVHGLIFL	10	1393.86	UCH37_DEUBAD_UbPG plus K48 Ub2	120	1397.32	0.095612	2.26943	0.267904	6.73952	0.048976
UCHL5_HUMAN	55	67	LFKWQPGEEPAGS	10	1445.71	UCH37_DEUBAD UbPG plus K6/48 Ub3	0	1446.54	0.033082	0	0	5.96311	0.02387
UCHL5_HUMAN	55	67	LFKWQPGEEPAGS	10	1445.71	UCH37_DEUBAD UbPG plus K6/48 Ub3	1	1450.56	0.02086	4.02502	0.039109	5.8987	0.005595
UCHL5_HUMAN	55	67	LFKWQPGEEPAGS	10	1445.71	UCH37_DEUBAD UbPG plus K6/48 Ub3	10	1451.13	0.014235	4.58736	0.036014	5.8929	0.001836
UCHL5_HUMAN	55	67	LFKWQPGEEPAGS	10	1445.71	UCH37_DEUBAD UbPG plus K6/48 Ub3	30	1451.44	0.003113	4.904	0.033228	5.89338	0.002458
UCHL5_HUMAN	55	67	LFKWQPGEEPAGS	10	1445.71	UCH37_DEUBAD UbPG plus K6/48 Ub3	60	1451.7	0.025463	5.15949	0.041747	5.89286	0.003086
UCHL5_HUMAN	55	67	LFKWQPGEEPAGS	10	1445.71	UCH37_DEUBAD UbPG plus K6/48 Ub3	120	1451.86	0.024119	5.31868	0.040941	5.89496	0.001454
UCHL5_HUMAN	55	67	LFKWQPGEEPAGS	10	1445.71	UCH37_DEUBAD UbPG plus Ub	0	1446.54	0.033082	0	0	5.96311	0.02387
UCHL5_HUMAN	55	67	LFKWQPGEEPAGS	10	1445.71	UCH37_DEUBAD UbPG plus Ub	1	1450.38	0	3.83932	0.033082	5.96296	0
UCHL5_HUMAN	55	67	LFKWQPGEEPAGS	10	1445.71	UCH37_DEUBAD UbPG plus Ub	10	1450.99	0.025152	4.44966	0.041557	5.94402	0.004524
UCHL5_HUMAN	55	67	LFKWQPGEEPAGS	10	1445.71	UCH37_DEUBAD UbPG plus Ub	30	1451.28	0.004421	4.74166	0.033376	5.94301	0.001351
UCHL5_HUMAN	55	67	LFKWQPGEEPAGS	10	1445.71	UCH37_DEUBAD UbPG plus Ub	60	1451.55	0.023759	5.01134	0.04073	5.94546	0.003634
UCHL5_HUMAN	55	67	LFKWQPGEEPAGS	10	1445.71	UCH37_DEUBAD UbPG plus Ub	120	1451.67	0.011648	5.13099	0.035073	5.94397	0.004074
UCHL5_HUMAN	55	67	LFKWQPGEEPAGS	10	1445.71	UCH37_DEUBAD_UbPG	0	1446.54	0.033082	0	0	5.96311	0.02387
UCHL5_HUMAN	55	67	LFKWQPGEEPAGS	10	1445.71	UCH37_DEUBAD_UbPG	1	1450.4	0.038142	3.85948	0.05049	5.95641	0.020861
UCHL5_HUMAN	55	67	LFKWQPGEEPAGS	10	1445.71	UCH37_DEUBAD_UbPG	10	1450.94	0.082675	4.39948	0.089048	5.95517	0.019754
UCHL5_HUMAN	55	67	LFKWQPGEEPAGS	10	1445.71	UCH37_DEUBAD_UbPG	30	1451.28	0.055045	4.73957	0.064221	5.95423	0.021819
UCHL5_HUMAN	55	67	LFKWQPGEEPAGS	10	1445.71	UCH37_DEUBAD_UbPG	60	1451.48	0.060534	4.93851	0.068984	5.9545	0.021417
UCHL5_HUMAN	55	67	LFKWQPGEEPAGS	10	1445.71	UCH37_DEUBAD_UbPG	120	1451.67	0.011291	5.13207	0.034956	5.95656	0.023522
UCHL5_HUMAN	55	67	LFKWQPGEEPAGS	10	1445.71	UCH37_DEUBAD_UbPG plus K48 Ub2	0	1446.54	0.033082	0	0	5.96311	0.02387
UCHL5_HUMAN	55	67	LFKWQPGEEPAGS	10	1445.71	UCH37_DEUBAD_UbPG plus K48 Ub2	1	1450.47	0.01675	3.93414	0.03708	5.97305	0.017564
UCHL5_HUMAN	55	67	LFKWQPGEEPAGS	10	1445.71	UCH37_DEUBAD_UbPG plus K48 Ub2	10	1451.07	0.060642	4.53156	0.069079	5.96421	0.021102
UCHL5_HUMAN	55	67	LFKWQPGEEPAGS	10	1445.71	UCH37_DEUBAD_UbPG plus K48 Ub2	30	1451.34	0.052036	4.7956	0.061662	5.96467	0.014616
UCHL5_HUMAN	55	67	LFKWQPGEEPAGS	10	1445.71	UCH37_DEUBAD_UbPG plus K48 Ub2	60	1451.56	0.010717	5.02139	0.034775	5.96317	0.017583
UCHL5_HUMAN	55	67	LFKWQPGEEPAGS	10	1445.71	UCH37_DEUBAD_UbPG plus K48 Ub2	120	1451.68	0.035258	5.13733	0.048348	5.96169	0.018078
UCHL5_HUMAN	55	68	LFKWQPGEEPAGSV	11	1544.77	UCH37_DEUBAD UbPG plus K6/48 Ub3	0	1545.49	0.037792	0	0	6.54622	0.028195
UCHL5_HUMAN	55	68	LFKWQPGEEPAGSV	11	1544.77	UCH37_DEUBAD UbPG plus K6/48 Ub3	1	1550.63	0.049746	5.13901	0.062473	6.25145	0.000533
UCHL5_HUMAN	55	68	LFKWQPGEEPAGSV	11	1544.77	UCH37_DEUBAD UbPG plus K6/48 Ub3	10	1551.11	0.073791	5.62185	0.082906	6.24451	0.002524
UCHL5_HUMAN	55	68	LFKWQPGEEPAGSV	11	1544.77	UCH37_DEUBAD UbPG plus K6/48 Ub3	30	1551.4	0.024793	5.91582	0.045199	6.24338	0.001999
UCHL5_HUMAN	55	68	LFKWQPGEEPAGSV	11	1544.77	UCH37_DEUBAD UbPG plus K6/48 Ub3	60	1551.64	0.027657	6.14747	0.046831	6.24446	0.001642
UCHL5_HUMAN	55	68	LFKWQPGEEPAGSV	11	1544.77	UCH37_DEUBAD UbPG plus K6/48 Ub3	120	1551.87	0.003569	6.38513	0.03796	6.2469	7.2091e-05
UCHL5_HUMAN	55	68	LFKWQPGEEPAGSV	11	1544.77	UCH37_DEUBAD UbPG plus Ub	0	1545.49	0.037792	0	0	6.54622	0.028195
UCHL5_HUMAN	55	68	LFKWQPGEEPAGSV	11	1544.77	UCH37_DEUBAD UbPG plus Ub	1	1550.59	0	5.097	0.037792	6.31366	0
UCHL5_HUMAN	55	68	LFKWQPGEEPAGSV	11	1544.77	UCH37_DEUBAD UbPG plus Ub	10	1550.94	0.004831	5.4532	0.038099	6.31246	0.001822
UCHL5_HUMAN	55	68	LFKWQPGEEPAGSV	11	1544.77	UCH37_DEUBAD UbPG plus Ub	30	1551.38	0	5.88649	0.037792	6.50875	0
UCHL5_HUMAN	55	68	LFKWQPGEEPAGSV	11	1544.77	UCH37_DEUBAD UbPG plus Ub	60	1551.46	0	5.96996	0.037792	6.30573	0
UCHL5_HUMAN	55	68	LFKWQPGEEPAGSV	11	1544.77	UCH37_DEUBAD UbPG plus Ub	120	1551.71	0.022652	6.22464	0.044061	6.30154	0.002841
UCHL5_HUMAN	55	68	LFKWQPGEEPAGSV	11	1544.77	UCH37_DEUBAD_UbPG	0	1545.49	0.037792	0	0	6.54622	0.028195
UCHL5_HUMAN	55	68	LFKWQPGEEPAGSV	11	1544.77	UCH37_DEUBAD_UbPG	1	1550.51	0	5.01948	0.037792	6.34577	0
UCHL5_HUMAN	55	68	LFKWQPGEEPAGSV	11	1544.77	UCH37_DEUBAD_UbPG	10	1551.02	0	5.53221	0.037792	6.34048	0
UCHL5_HUMAN	55	68	LFKWQPGEEPAGSV	11	1544.77	UCH37_DEUBAD_UbPG	30	1551.33	0.019394	5.84541	0.042477	6.31802	0.020054
UCHL5_HUMAN	55	68	LFKWQPGEEPAGSV	11	1544.77	UCH37_DEUBAD_UbPG	60	1551.6	0.142199	6.11044	0.147135	6.34538	0.006351
UCHL5_HUMAN	55	68	LFKWQPGEEPAGSV	11	1544.77	UCH37_DEUBAD_UbPG	120	1551.72	0.021586	6.22666	0.043522	6.31773	0.020553
UCHL5_HUMAN	55	68	LFKWQPGEEPAGSV	11	1544.77	UCH37_DEUBAD_UbPG plus K48 Ub2	0	1545.49	0.037792	0	0	6.54622	0.028195
UCHL5_HUMAN	55	68	LFKWQPGEEPAGSV	11	1544.77	UCH37_DEUBAD_UbPG plus K48 Ub2	1	1550.49	0.080002	5.00554	0.088479	6.33344	0.017819
UCHL5_HUMAN	55	68	LFKWQPGEEPAGSV	11	1544.77	UCH37_DEUBAD_UbPG plus K48 Ub2	10	1551.13	0.088887	5.63705	0.096587	6.32925	0.019893
UCHL5_HUMAN	55	68	LFKWQPGEEPAGSV	11	1544.77	UCH37_DEUBAD_UbPG plus K48 Ub2	30	1551.33	0.036474	5.83884	0.052522	6.3377	0.002296
UCHL5_HUMAN	55	68	LFKWQPGEEPAGSV	11	1544.77	UCH37_DEUBAD_UbPG plus K48 Ub2	60	1551.6	0.051501	6.11419	0.063879	6.33532	0.000904
UCHL5_HUMAN	55	68	LFKWQPGEEPAGSV	11	1544.77	UCH37_DEUBAD_UbPG plus K48 Ub2	120	1551.93	0.965801	6.44577	0.96654	6.34192	0.035916
UCHL5_HUMAN	55	70	LFKWQPGEEPAGSVVQ	13	1771.9	UCH37_DEUBAD UbPG plus K6/48 Ub3	0	1772.72	0.065626	0	0	6.23548	0.020625
UCHL5_HUMAN	55	70	LFKWQPGEEPAGSVVQ	13	1771.9	UCH37_DEUBAD UbPG plus K6/48 Ub3	1	1778.71	0.104246	5.98659	0.123183	6.15007	0.008658
UCHL5_HUMAN	55	70	LFKWQPGEEPAGSVVQ	13	1771.9	UCH37_DEUBAD UbPG plus K6/48 Ub3	10	1779.24	0.242089	6.51201	0.250826	6.1491	0.003637
UCHL5_HUMAN	55	70	LFKWQPGEEPAGSVVQ	13	1771.9	UCH37_DEUBAD UbPG plus K6/48 Ub3	30	1779.92	0.220677	7.19287	0.230228	6.15163	0.000202
UCHL5_HUMAN	55	70	LFKWQPGEEPAGSVVQ	13	1771.9	UCH37_DEUBAD UbPG plus K6/48 Ub3	60	1780.34	0.129928	7.611	0.145561	6.1495	0.000287
UCHL5_HUMAN	55	70	LFKWQPGEEPAGSVVQ	13	1771.9	UCH37_DEUBAD UbPG plus K6/48 Ub3	120	1780.63	0.152445	7.90328	0.16597	6.14839	0.003266
UCHL5_HUMAN	55	70	LFKWQPGEEPAGSVVQ	13	1771.9	UCH37_DEUBAD UbPG plus Ub	0	1772.72	0.065626	0	0	6.23548	0.020625
UCHL5_HUMAN	55	70	LFKWQPGEEPAGSVVQ	13	1771.9	UCH37_DEUBAD UbPG plus Ub	1	1778.43	0.173253	5.70237	0.185266	6.20974	0.00601
UCHL5_HUMAN	55	70	LFKWQPGEEPAGSVVQ	13	1771.9	UCH37_DEUBAD UbPG plus Ub	10	1779.34	0.164392	6.61143	0.177007	6.21031	0.002914
UCHL5_HUMAN	55	70	LFKWQPGEEPAGSVVQ	13	1771.9	UCH37_DEUBAD UbPG plus Ub	30	1779.82	0.163315	7.09133	0.176007	6.20729	0.003114
UCHL5_HUMAN	55	70	LFKWQPGEEPAGSVVQ	13	1771.9	UCH37_DEUBAD UbPG plus Ub	60	1780.18	0.239162	7.45226	0.248002	6.20339	0.005631
UCHL5_HUMAN	55	70	LFKWQPGEEPAGSVVQ	13	1771.9	UCH37_DEUBAD UbPG plus Ub	120	1780.39	0.207198	7.66991	0.217342	6.2035	0.003127
UCHL5_HUMAN	55	70	LFKWQPGEEPAGSVVQ	13	1771.9	UCH37_DEUBAD_UbPG	0	1772.72	0.065626	0	0	6.23548	0.020625
UCHL5_HUMAN	55	70	LFKWQPGEEPAGSVVQ	13	1771.9	UCH37_DEUBAD_UbPG	1	1778.6	0.069426	5.87883	0.095534	6.24576	0.001051
UCHL5_HUMAN	55	70	LFKWQPGEEPAGSVVQ	13	1771.9	UCH37_DEUBAD_UbPG	10	1779.36	0.139819	6.64027	0.154454	6.24187	0.000897
UCHL5_HUMAN	55	70	LFKWQPGEEPAGSVVQ	13	1771.9	UCH37_DEUBAD_UbPG	30	1779.84	2.27374e-13	7.1124	0.065626	5.84789	0
UCHL5_HUMAN	55	70	LFKWQPGEEPAGSVVQ	13	1771.9	UCH37_DEUBAD_UbPG	60	1780.23	0.127071	7.50883	0.143016	6.22147	0.019229
UCHL5_HUMAN	55	70	LFKWQPGEEPAGSVVQ	13	1771.9	UCH37_DEUBAD_UbPG	120	1780.58	0.052147	7.85786	0.083821	6.2444	0.001515
UCHL5_HUMAN	55	70	LFKWQPGEEPAGSVVQ	13	1771.9	UCH37_DEUBAD_UbPG plus K48 Ub2	0	1772.72	0.065626	0	0	6.23548	0.020625
UCHL5_HUMAN	55	70	LFKWQPGEEPAGSVVQ	13	1771.9	UCH37_DEUBAD_UbPG plus K48 Ub2	1	1778.75	0.308834	6.02149	0.315729	6.23542	0.0153
UCHL5_HUMAN	55	70	LFKWQPGEEPAGSVVQ	13	1771.9	UCH37_DEUBAD_UbPG plus K48 Ub2	10	1779.71	0.28289	6.98289	0.290403	6.23228	0.018487
UCHL5_HUMAN	55	70	LFKWQPGEEPAGSVVQ	13	1771.9	UCH37_DEUBAD_UbPG plus K48 Ub2	30	1780.08	0.228838	7.35334	0.238062	6.23109	0.014027
UCHL5_HUMAN	55	70	LFKWQPGEEPAGSVVQ	13	1771.9	UCH37_DEUBAD_UbPG plus K48 Ub2	60	1780.4	0.193361	7.67848	0.204194	6.2273	0.016653
UCHL5_HUMAN	55	70	LFKWQPGEEPAGSVVQ	13	1771.9	UCH37_DEUBAD_UbPG plus K48 Ub2	120	1780.53	0.108309	7.80576	0.12664	6.22286	0.019187
UCHL5_HUMAN	55	71	LFKWQPGEEPAGSVVQD	14	1886.93	UCH37_DEUBAD UbPG plus K6/48 Ub3	0	1887.97	0.016688	0	0	6.2489	0.019206
UCHL5_HUMAN	55	71	LFKWQPGEEPAGSVVQD	14	1886.93	UCH37_DEUBAD UbPG plus K6/48 Ub3	1	1894.2	0.059258	6.22378	0.061563	6.16876	0.004722
UCHL5_HUMAN	55	71	LFKWQPGEEPAGSVVQD	14	1886.93	UCH37_DEUBAD UbPG plus K6/48 Ub3	10	1894.96	0.047922	6.98332	0.050745	6.16614	0.004308
UCHL5_HUMAN	55	71	LFKWQPGEEPAGSVVQD	14	1886.93	UCH37_DEUBAD UbPG plus K6/48 Ub3	30	1895.54	0.032485	7.56742	0.036521	6.16571	0.004259
UCHL5_HUMAN	55	71	LFKWQPGEEPAGSVVQD	14	1886.93	UCH37_DEUBAD UbPG plus K6/48 Ub3	60	1895.83	0.037823	7.86032	0.041341	6.16462	0.005517
UCHL5_HUMAN	55	71	LFKWQPGEEPAGSVVQD	14	1886.93	UCH37_DEUBAD UbPG plus K6/48 Ub3	120	1896.13	0.025301	8.16097	0.030309	6.16796	0.004263
UCHL5_HUMAN	55	71	LFKWQPGEEPAGSVVQD	14	1886.93	UCH37_DEUBAD UbPG plus Ub	0	1887.97	0.016688	0	0	6.2489	0.019206
UCHL5_HUMAN	55	71	LFKWQPGEEPAGSVVQD	14	1886.93	UCH37_DEUBAD UbPG plus Ub	1	1894.07	0.03302	6.10137	0.036997	6.22908	0.002843
UCHL5_HUMAN	55	71	LFKWQPGEEPAGSVVQD	14	1886.93	UCH37_DEUBAD UbPG plus Ub	10	1894.79	0.035494	6.81391	0.039222	6.22334	0.003807
UCHL5_HUMAN	55	71	LFKWQPGEEPAGSVVQD	14	1886.93	UCH37_DEUBAD UbPG plus Ub	30	1895.36	0.063403	7.3867	0.065563	6.21713	0.003442
UCHL5_HUMAN	55	71	LFKWQPGEEPAGSVVQD	14	1886.93	UCH37_DEUBAD UbPG plus Ub	60	1895.69	0.060979	7.71761	0.063221	6.21846	0.004229
UCHL5_HUMAN	55	71	LFKWQPGEEPAGSVVQD	14	1886.93	UCH37_DEUBAD UbPG plus Ub	120	1895.87	0.040617	7.89982	0.043912	6.21673	0.004735
UCHL5_HUMAN	55	71	LFKWQPGEEPAGSVVQD	14	1886.93	UCH37_DEUBAD_UbPG	0	1887.97	0.016688	0	0	6.2489	0.019206
UCHL5_HUMAN	55	71	LFKWQPGEEPAGSVVQD	14	1886.93	UCH37_DEUBAD_UbPG	1	1894.06	0	6.08876	0.016688	6.25889	0
UCHL5_HUMAN	55	71	LFKWQPGEEPAGSVVQD	14	1886.93	UCH37_DEUBAD_UbPG	10	1894.58	0.287682	6.61084	0.288165	6.23762	0.01783
UCHL5_HUMAN	55	71	LFKWQPGEEPAGSVVQD	14	1886.93	UCH37_DEUBAD_UbPG	30	1895.41	0.061159	7.43647	0.063395	6.22938	0.018558
UCHL5_HUMAN	55	71	LFKWQPGEEPAGSVVQD	14	1886.93	UCH37_DEUBAD_UbPG	60	1895.7	0.032343	7.7263	0.036395	6.23334	0.019458
UCHL5_HUMAN	55	71	LFKWQPGEEPAGSVVQD	14	1886.93	UCH37_DEUBAD_UbPG	120	1895.89	0.057645	7.91771	0.060012	6.23183	0.02063
UCHL5_HUMAN	55	71	LFKWQPGEEPAGSVVQD	14	1886.93	UCH37_DEUBAD_UbPG plus K48 Ub2	0	1887.97	0.016688	0	0	6.2489	0.019206
UCHL5_HUMAN	55	71	LFKWQPGEEPAGSVVQD	14	1886.93	UCH37_DEUBAD_UbPG plus K48 Ub2	1	1894.2	0.101681	6.22521	0.103042	6.24631	0.01694
UCHL5_HUMAN	55	71	LFKWQPGEEPAGSVVQD	14	1886.93	UCH37_DEUBAD_UbPG plus K48 Ub2	10	1895.01	0.051213	7.0365	0.053864	6.25532	0.00177
UCHL5_HUMAN	55	71	LFKWQPGEEPAGSVVQD	14	1886.93	UCH37_DEUBAD_UbPG plus K48 Ub2	30	1895.49	0.045837	7.51495	0.048781	6.24115	0.014011
UCHL5_HUMAN	55	71	LFKWQPGEEPAGSVVQD	14	1886.93	UCH37_DEUBAD_UbPG plus K48 Ub2	60	1895.8	0.056125	7.82708	0.058553	6.23715	0.015228
UCHL5_HUMAN	55	71	LFKWQPGEEPAGSVVQD	14	1886.93	UCH37_DEUBAD_UbPG plus K48 Ub2	120	1895.91	0.057541	7.93637	0.059912	6.23788	0.01642
UCHL5_HUMAN	56	67	FKWQPGEEPAGS	9	1332.62	UCH37_DEUBAD UbPG plus K6/48 Ub3	0	1333.68	0.08596	0	0	5.45082	0.015092
UCHL5_HUMAN	56	67	FKWQPGEEPAGS	9	1332.62	UCH37_DEUBAD UbPG plus K6/48 Ub3	1	1337.54	0.005623	3.8638	0.086143	5.38027	0.007204
UCHL5_HUMAN	56	67	FKWQPGEEPAGS	9	1332.62	UCH37_DEUBAD UbPG plus K6/48 Ub3	10	1338.03	0.014964	4.3499	0.087252	5.3756	0.00299
UCHL5_HUMAN	56	67	FKWQPGEEPAGS	9	1332.62	UCH37_DEUBAD UbPG plus K6/48 Ub3	30	1338.31	0.022853	4.62953	0.088946	5.37679	0.002149
UCHL5_HUMAN	56	67	FKWQPGEEPAGS	9	1332.62	UCH37_DEUBAD UbPG plus K6/48 Ub3	60	1338.5	0.005764	4.82583	0.086153	5.37909	0.000345
UCHL5_HUMAN	56	67	FKWQPGEEPAGS	9	1332.62	UCH37_DEUBAD UbPG plus K6/48 Ub3	120	1338.63	0.01016	4.95749	0.086558	5.37955	0.002398
UCHL5_HUMAN	56	67	FKWQPGEEPAGS	9	1332.62	UCH37_DEUBAD UbPG plus Ub	0	1333.68	0.08596	0	0	5.45082	0.015092
UCHL5_HUMAN	56	67	FKWQPGEEPAGS	9	1332.62	UCH37_DEUBAD UbPG plus Ub	1	1337.35	0.007636	3.66979	0.086298	5.4371	0.004795
UCHL5_HUMAN	56	67	FKWQPGEEPAGS	9	1332.62	UCH37_DEUBAD UbPG plus Ub	10	1337.9	0.027049	4.226	0.090115	5.43384	0.002379
UCHL5_HUMAN	56	67	FKWQPGEEPAGS	9	1332.62	UCH37_DEUBAD UbPG plus Ub	30	1338.14	0.010899	4.46462	0.086648	5.42989	0.005054
UCHL5_HUMAN	56	67	FKWQPGEEPAGS	9	1332.62	UCH37_DEUBAD UbPG plus Ub	60	1338.33	0	4.64885	0.08596	5.43312	0
UCHL5_HUMAN	56	67	FKWQPGEEPAGS	9	1332.62	UCH37_DEUBAD UbPG plus Ub	120	1338.44	0.007972	4.76058	0.086328	5.42752	0.003298
UCHL5_HUMAN	56	67	FKWQPGEEPAGS	9	1332.62	UCH37_DEUBAD_UbPG	0	1333.68	0.08596	0	0	5.45082	0.015092
UCHL5_HUMAN	56	67	FKWQPGEEPAGS	9	1332.62	UCH37_DEUBAD_UbPG	1	1337.32	0.041711	3.64543	0.095545	5.43927	0.017271
UCHL5_HUMAN	56	67	FKWQPGEEPAGS	9	1332.62	UCH37_DEUBAD_UbPG	10	1337.93	0.054535	4.25066	0.101799	5.43865	0.014432
UCHL5_HUMAN	56	67	FKWQPGEEPAGS	9	1332.62	UCH37_DEUBAD_UbPG	30	1338.19	0.00564	4.50901	0.086144	5.43646	0.015678
UCHL5_HUMAN	56	67	FKWQPGEEPAGS	9	1332.62	UCH37_DEUBAD_UbPG	60	1338.39	0.017626	4.71573	0.087748	5.43689	0.017133
UCHL5_HUMAN	56	67	FKWQPGEEPAGS	9	1332.62	UCH37_DEUBAD_UbPG	120	1338.51	0.07409	4.83373	0.113483	5.43934	0.017966
UCHL5_HUMAN	56	67	FKWQPGEEPAGS	9	1332.62	UCH37_DEUBAD_UbPG plus K48 Ub2	0	1333.68	0.08596	0	0	5.45082	0.015092
UCHL5_HUMAN	56	67	FKWQPGEEPAGS	9	1332.62	UCH37_DEUBAD_UbPG plus K48 Ub2	1	1337.42	0.028676	3.74649	0.090617	5.45134	0.013336
UCHL5_HUMAN	56	67	FKWQPGEEPAGS	9	1332.62	UCH37_DEUBAD_UbPG plus K48 Ub2	10	1337.98	0.041503	4.30619	0.095455	5.44298	0.016426
UCHL5_HUMAN	56	67	FKWQPGEEPAGS	9	1332.62	UCH37_DEUBAD_UbPG plus K48 Ub2	30	1338.22	0.012954	4.54374	0.08693	5.44197	0.010613
UCHL5_HUMAN	56	67	FKWQPGEEPAGS	9	1332.62	UCH37_DEUBAD_UbPG plus K48 Ub2	60	1338.38	0.022406	4.69975	0.088832	5.44012	0.013332
UCHL5_HUMAN	56	67	FKWQPGEEPAGS	9	1332.62	UCH37_DEUBAD_UbPG plus K48 Ub2	120	1338.45	0.014362	4.77254	0.087151	5.44908	0.003061
UCHL5_HUMAN	56	68	FKWQPGEEPAGSV	10	1431.69	UCH37_DEUBAD UbPG plus K6/48 Ub3	0	1432.45	0.048001	0	0	5.84587	0.02364
UCHL5_HUMAN	56	68	FKWQPGEEPAGSV	10	1431.69	UCH37_DEUBAD UbPG plus K6/48 Ub3	1	1437.35	0.037626	4.8967	0.06099	5.77898	0.005249
UCHL5_HUMAN	56	68	FKWQPGEEPAGSV	10	1431.69	UCH37_DEUBAD UbPG plus K6/48 Ub3	10	1437.82	0.018796	5.36093	0.05155	5.77451	0.003056
UCHL5_HUMAN	56	68	FKWQPGEEPAGSV	10	1431.69	UCH37_DEUBAD UbPG plus K6/48 Ub3	30	1438.08	0.055525	5.62631	0.073396	5.77301	0.002993
UCHL5_HUMAN	56	68	FKWQPGEEPAGSV	10	1431.69	UCH37_DEUBAD UbPG plus K6/48 Ub3	60	1438.27	0.069876	5.8157	0.084775	5.77406	0.004464
UCHL5_HUMAN	56	68	FKWQPGEEPAGSV	10	1431.69	UCH37_DEUBAD UbPG plus K6/48 Ub3	120	1438.43	0.621911	5.97605	0.623761	5.77537	0.010366
UCHL5_HUMAN	56	68	FKWQPGEEPAGSV	10	1431.69	UCH37_DEUBAD UbPG plus Ub	0	1432.46	0.014469	0	0	5.84255	0.019824
UCHL5_HUMAN	56	68	FKWQPGEEPAGSV	10	1431.69	UCH37_DEUBAD UbPG plus Ub	1	1437.33	0.087695	4.87297	0.08888	5.82014	0.009167
UCHL5_HUMAN	56	68	FKWQPGEEPAGSV	10	1431.69	UCH37_DEUBAD UbPG plus Ub	10	1437.81	0.068762	5.35343	0.070268	5.81468	0.00575
UCHL5_HUMAN	56	68	FKWQPGEEPAGSV	10	1431.69	UCH37_DEUBAD UbPG plus Ub	30	1438.07	0.054342	5.6154	0.056235	5.81278	0.000961
UCHL5_HUMAN	56	68	FKWQPGEEPAGSV	10	1431.69	UCH37_DEUBAD UbPG plus Ub	60	1438.33	0.015026	5.86963	0.02086	5.81307	0.002423
UCHL5_HUMAN	56	68	FKWQPGEEPAGSV	10	1431.69	UCH37_DEUBAD UbPG plus Ub	120	1438.38	0.023742	5.91594	0.027804	5.81186	0.00238
UCHL5_HUMAN	56	68	FKWQPGEEPAGSV	10	1431.69	UCH37_DEUBAD_UbPG	0	1432.46	0.014469	0	0	5.84255	0.019824
UCHL5_HUMAN	56	68	FKWQPGEEPAGSV	10	1431.69	UCH37_DEUBAD_UbPG	1	1437.25	0	4.78971	0.014469	5.85052	0
UCHL5_HUMAN	56	68	FKWQPGEEPAGSV	10	1431.69	UCH37_DEUBAD_UbPG	10	1437.7	0	5.23842	0.014469	5.84518	0
UCHL5_HUMAN	56	68	FKWQPGEEPAGSV	10	1431.69	UCH37_DEUBAD_UbPG	30	1438.19	0	5.73356	0.014469	5.84344	0
UCHL5_HUMAN	56	68	FKWQPGEEPAGSV	10	1431.69	UCH37_DEUBAD_UbPG	60	1438.15	2.27374e-13	5.69541	0.014469	5.84776	0
UCHL5_HUMAN	56	68	FKWQPGEEPAGSV	10	1431.69	UCH37_DEUBAD_UbPG	120	1438.42	0	5.96329	0.014469	5.84868	0
UCHL5_HUMAN	56	68	FKWQPGEEPAGSV	10	1431.69	UCH37_DEUBAD_UbPG plus K48 Ub2	0	1432.46	0.014469	0	0	5.84255	0.019824
UCHL5_HUMAN	56	68	FKWQPGEEPAGSV	10	1431.69	UCH37_DEUBAD_UbPG plus K48 Ub2	1	1437.38	0.050064	4.92458	0.052113	5.84407	0.016018
UCHL5_HUMAN	56	68	FKWQPGEEPAGSV	10	1431.69	UCH37_DEUBAD_UbPG plus K48 Ub2	10	1437.82	0.065184	5.36543	0.066771	5.83467	0.015523
UCHL5_HUMAN	56	68	FKWQPGEEPAGSV	10	1431.69	UCH37_DEUBAD_UbPG plus K48 Ub2	30	1438.17	0.031631	5.71263	0.034783	5.82951	0.012627
UCHL5_HUMAN	56	68	FKWQPGEEPAGSV	10	1431.69	UCH37_DEUBAD_UbPG plus K48 Ub2	60	1438.33	0.037013	5.86604	0.039741	5.82769	0.012353
UCHL5_HUMAN	56	68	FKWQPGEEPAGSV	10	1431.69	UCH37_DEUBAD_UbPG plus K48 Ub2	120	1438.44	0.04167	5.98359	0.044111	5.82951	0.01446
UCHL5_HUMAN	56	70	FKWQPGEEPAGSVVQ	12	1658.82	UCH37_DEUBAD UbPG plus K6/48 Ub3	0	1659.69	0.031767	0	0	5.77575	0.021797
UCHL5_HUMAN	56	70	FKWQPGEEPAGSVVQ	12	1658.82	UCH37_DEUBAD UbPG plus K6/48 Ub3	1	1665.68	0.057418	5.98645	0.06562	5.70717	0.007445
UCHL5_HUMAN	56	70	FKWQPGEEPAGSVVQ	12	1658.82	UCH37_DEUBAD UbPG plus K6/48 Ub3	10	1666.41	0.04651	6.72421	0.056323	5.7004	0.002309
UCHL5_HUMAN	56	70	FKWQPGEEPAGSVVQ	12	1658.82	UCH37_DEUBAD UbPG plus K6/48 Ub3	30	1667.02	0.142887	7.33336	0.146375	5.70047	0.002887
UCHL5_HUMAN	56	70	FKWQPGEEPAGSVVQ	12	1658.82	UCH37_DEUBAD UbPG plus K6/48 Ub3	60	1667.27	0.091389	7.58369	0.096753	5.69973	0.003193
UCHL5_HUMAN	56	70	FKWQPGEEPAGSVVQ	12	1658.82	UCH37_DEUBAD UbPG plus K6/48 Ub3	120	1667.39	0.109926	7.69638	0.114424	5.70426	0.003105
UCHL5_HUMAN	56	70	FKWQPGEEPAGSVVQ	12	1658.82	UCH37_DEUBAD UbPG plus Ub	0	1659.66	0.032804	0	0	5.77591	0.0221
UCHL5_HUMAN	56	70	FKWQPGEEPAGSVVQ	12	1658.82	UCH37_DEUBAD UbPG plus Ub	1	1665.37	0.013796	5.70922	0.035587	5.76867	0.001539
UCHL5_HUMAN	56	70	FKWQPGEEPAGSVVQ	12	1658.82	UCH37_DEUBAD UbPG plus Ub	10	1666.26	0.152734	6.59858	0.156217	5.7546	0.002087
UCHL5_HUMAN	56	70	FKWQPGEEPAGSVVQ	12	1658.82	UCH37_DEUBAD UbPG plus Ub	30	1666.9	0.086321	7.2379	0.092344	5.74843	0.000747
UCHL5_HUMAN	56	70	FKWQPGEEPAGSVVQ	12	1658.82	UCH37_DEUBAD UbPG plus Ub	60	1667.16	0.154671	7.49878	0.158111	5.75288	0.002984
UCHL5_HUMAN	56	70	FKWQPGEEPAGSVVQ	12	1658.82	UCH37_DEUBAD UbPG plus Ub	120	1667.25	0.115975	7.5865	0.120525	5.75297	0.000813
UCHL5_HUMAN	56	70	FKWQPGEEPAGSVVQ	12	1658.82	UCH37_DEUBAD_UbPG	0	1659.7	0.040932	0	0	5.77615	0.021975
UCHL5_HUMAN	56	70	FKWQPGEEPAGSVVQ	12	1658.82	UCH37_DEUBAD_UbPG	1	1665.64	0.100207	5.94219	0.108244	5.78305	0.001353
UCHL5_HUMAN	56	70	FKWQPGEEPAGSVVQ	12	1658.82	UCH37_DEUBAD_UbPG	10	1666.26	0	6.56362	0.040932	5.77883	0
UCHL5_HUMAN	56	70	FKWQPGEEPAGSVVQ	12	1658.82	UCH37_DEUBAD_UbPG	30	1666.97	0.031522	7.26672	0.051663	5.77529	0.002224
UCHL5_HUMAN	56	70	FKWQPGEEPAGSVVQ	12	1658.82	UCH37_DEUBAD_UbPG	60	1667.04	0.054594	7.3415	0.068234	5.75743	0.019527
UCHL5_HUMAN	56	70	FKWQPGEEPAGSVVQ	12	1658.82	UCH37_DEUBAD_UbPG	120	1667.24	0.082328	7.54511	0.091942	5.7825	0.001714
UCHL5_HUMAN	56	70	FKWQPGEEPAGSVVQ	12	1658.82	UCH37_DEUBAD_UbPG plus K48 Ub2	0	1659.66	0.032804	0	0	5.77591	0.0221
UCHL5_HUMAN	56	70	FKWQPGEEPAGSVVQ	12	1658.82	UCH37_DEUBAD_UbPG plus K48 Ub2	1	1665.72	0.065803	6.05655	0.073527	5.79172	0.000403
UCHL5_HUMAN	56	70	FKWQPGEEPAGSVVQ	12	1658.82	UCH37_DEUBAD_UbPG plus K48 Ub2	10	1666.36	0.077124	6.69572	0.083811	5.76091	0.020322
UCHL5_HUMAN	56	70	FKWQPGEEPAGSVVQ	12	1658.82	UCH37_DEUBAD_UbPG plus K48 Ub2	30	1666.9	0.077222	7.24046	0.0839	5.7664	0.011931
UCHL5_HUMAN	56	70	FKWQPGEEPAGSVVQ	12	1658.82	UCH37_DEUBAD_UbPG plus K48 Ub2	60	1667.18	0.054394	7.5198	0.06352	5.76374	0.012983
UCHL5_HUMAN	56	70	FKWQPGEEPAGSVVQ	12	1658.82	UCH37_DEUBAD_UbPG plus K48 Ub2	120	1667.32	0.135033	7.65544	0.13896	5.75898	0.015378
UCHL5_HUMAN	56	71	FKWQPGEEPAGSVVQD	13	1773.84	UCH37_DEUBAD UbPG plus K6/48 Ub3	0	1775.05	0.078202	0	0	5.78444	0.020926
UCHL5_HUMAN	56	71	FKWQPGEEPAGSVVQD	13	1773.84	UCH37_DEUBAD UbPG plus K6/48 Ub3	1	1781.11	0.054202	6.0559	0.09515	5.71996	0.006281
UCHL5_HUMAN	56	71	FKWQPGEEPAGSVVQD	13	1773.84	UCH37_DEUBAD UbPG plus K6/48 Ub3	10	1781.82	0.022792	6.77018	0.081456	5.71296	0.002266
UCHL5_HUMAN	56	71	FKWQPGEEPAGSVVQD	13	1773.84	UCH37_DEUBAD UbPG plus K6/48 Ub3	30	1782.37	0.044366	7.32142	0.089911	5.71356	0.002902
UCHL5_HUMAN	56	71	FKWQPGEEPAGSVVQD	13	1773.84	UCH37_DEUBAD UbPG plus K6/48 Ub3	60	1782.7	0.041538	7.64729	0.088549	5.71219	0.002523
UCHL5_HUMAN	56	71	FKWQPGEEPAGSVVQD	13	1773.84	UCH37_DEUBAD UbPG plus K6/48 Ub3	120	1782.84	0.061198	7.78681	0.099301	5.71608	0.002637
UCHL5_HUMAN	56	71	FKWQPGEEPAGSVVQD	13	1773.84	UCH37_DEUBAD UbPG plus Ub	0	1775.05	0.078202	0	0	5.78444	0.020926
UCHL5_HUMAN	56	71	FKWQPGEEPAGSVVQD	13	1773.84	UCH37_DEUBAD UbPG plus Ub	1	1780.99	0.047751	5.94104	0.091628	5.77731	0.000117
UCHL5_HUMAN	56	71	FKWQPGEEPAGSVVQD	13	1773.84	UCH37_DEUBAD UbPG plus Ub	10	1781.72	0.045985	6.67316	0.09072	5.76704	0.000437
UCHL5_HUMAN	56	71	FKWQPGEEPAGSVVQD	13	1773.84	UCH37_DEUBAD UbPG plus Ub	30	1782.25	0.052088	7.20426	0.093961	5.7625	0.003412
UCHL5_HUMAN	56	71	FKWQPGEEPAGSVVQD	13	1773.84	UCH37_DEUBAD UbPG plus Ub	60	1782.56	0.057606	7.51043	0.097129	5.7632	0.002354
UCHL5_HUMAN	56	71	FKWQPGEEPAGSVVQD	13	1773.84	UCH37_DEUBAD UbPG plus Ub	120	1782.67	0.060242	7.61843	0.098715	5.76139	0.002402
UCHL5_HUMAN	56	71	FKWQPGEEPAGSVVQD	13	1773.84	UCH37_DEUBAD_UbPG	0	1775.05	0.078202	0	0	5.78444	0.020926
UCHL5_HUMAN	56	71	FKWQPGEEPAGSVVQD	13	1773.84	UCH37_DEUBAD_UbPG	1	1780.93	0.109916	5.88011	0.134897	5.79195	0.002857
UCHL5_HUMAN	56	71	FKWQPGEEPAGSVVQD	13	1773.84	UCH37_DEUBAD_UbPG	10	1781.71	0.052161	6.66303	0.094002	5.7716	0.017001
UCHL5_HUMAN	56	71	FKWQPGEEPAGSVVQD	13	1773.84	UCH37_DEUBAD_UbPG	30	1782.31	0.057613	7.26508	0.097133	5.76894	0.018338
UCHL5_HUMAN	56	71	FKWQPGEEPAGSVVQD	13	1773.84	UCH37_DEUBAD_UbPG	60	1782.53	0.044538	7.48051	0.089995	5.78945	0.0033
UCHL5_HUMAN	56	71	FKWQPGEEPAGSVVQD	13	1773.84	UCH37_DEUBAD_UbPG	120	1782.75	0.048599	7.7009	0.092073	5.77212	0.021484
UCHL5_HUMAN	56	71	FKWQPGEEPAGSVVQD	13	1773.84	UCH37_DEUBAD_UbPG plus K48 Ub2	0	1775.05	0.078202	0	0	5.78444	0.020926
UCHL5_HUMAN	56	71	FKWQPGEEPAGSVVQD	13	1773.84	UCH37_DEUBAD_UbPG plus K48 Ub2	1	1781.09	0.091527	6.03889	0.120385	5.7895	0.015393
UCHL5_HUMAN	56	71	FKWQPGEEPAGSVVQD	13	1773.84	UCH37_DEUBAD_UbPG plus K48 Ub2	10	1781.83	0.061874	6.78052	0.099719	5.77885	0.018102
UCHL5_HUMAN	56	71	FKWQPGEEPAGSVVQD	13	1773.84	UCH37_DEUBAD_UbPG plus K48 Ub2	30	1782.31	0.076476	7.25641	0.109381	5.77785	0.012103
UCHL5_HUMAN	56	71	FKWQPGEEPAGSVVQD	13	1773.84	UCH37_DEUBAD_UbPG plus K48 Ub2	60	1782.61	0.057965	7.56216	0.097342	5.77569	0.013611
UCHL5_HUMAN	56	71	FKWQPGEEPAGSVVQD	13	1773.84	UCH37_DEUBAD_UbPG plus K48 Ub2	120	1782.7	0.080798	7.64961	0.112445	5.76774	0.013518
UCHL5_HUMAN	56	74	FKWQPGEEPAGSVVQDSRL	16	2130.06	UCH37_DEUBAD UbPG plus K6/48 Ub3	0	2131.31	0.073994	0	0	6.11226	0.023687
UCHL5_HUMAN	56	74	FKWQPGEEPAGSVVQDSRL	16	2130.06	UCH37_DEUBAD UbPG plus K6/48 Ub3	1	2139.4	0.099199	8.09435	0.123756	6.00888	0.005158
UCHL5_HUMAN	56	74	FKWQPGEEPAGSVVQDSRL	16	2130.06	UCH37_DEUBAD UbPG plus K6/48 Ub3	10	2140.23	0.045154	8.92267	0.086684	6.003	0.002219
UCHL5_HUMAN	56	74	FKWQPGEEPAGSVVQDSRL	16	2130.06	UCH37_DEUBAD UbPG plus K6/48 Ub3	30	2140.75	0.070546	9.44755	0.102234	6.00197	0.002728
UCHL5_HUMAN	56	74	FKWQPGEEPAGSVVQDSRL	16	2130.06	UCH37_DEUBAD UbPG plus K6/48 Ub3	60	2141.04	0.025113	9.73392	0.07814	6.00033	0.003314
UCHL5_HUMAN	56	74	FKWQPGEEPAGSVVQDSRL	16	2130.06	UCH37_DEUBAD UbPG plus K6/48 Ub3	120	2141.17	0.027826	9.86222	0.079053	6.00262	0.001336
UCHL5_HUMAN	56	74	FKWQPGEEPAGSVVQDSRL	16	2130.06	UCH37_DEUBAD UbPG plus Ub	0	2131.31	0.073994	0	0	6.11226	0.023687
UCHL5_HUMAN	56	74	FKWQPGEEPAGSVVQDSRL	16	2130.06	UCH37_DEUBAD UbPG plus Ub	1	2139.34	0	8.03802	0.073994	6.08161	0
UCHL5_HUMAN	56	74	FKWQPGEEPAGSVVQDSRL	16	2130.06	UCH37_DEUBAD UbPG plus Ub	10	2140.15	0.050698	8.83948	0.089696	6.07412	0.001791
UCHL5_HUMAN	56	74	FKWQPGEEPAGSVVQDSRL	16	2130.06	UCH37_DEUBAD UbPG plus Ub	30	2140.68	0.038255	9.37842	0.083298	6.07184	0.001707
UCHL5_HUMAN	56	74	FKWQPGEEPAGSVVQDSRL	16	2130.06	UCH37_DEUBAD UbPG plus Ub	60	2142.05	0.105521	10.7455	0.128879	6.0871	0.00379
UCHL5_HUMAN	56	74	FKWQPGEEPAGSVVQDSRL	16	2130.06	UCH37_DEUBAD UbPG plus Ub	120	2142.18	0	10.87	0.073994	6.08542	0
UCHL5_HUMAN	56	74	FKWQPGEEPAGSVVQDSRL	16	2130.06	UCH37_DEUBAD_UbPG	0	2131.31	0.073994	0	0	6.11226	0.023687
UCHL5_HUMAN	56	74	FKWQPGEEPAGSVVQDSRL	16	2130.06	UCH37_DEUBAD_UbPG	1	2139.45	0.087303	8.1412	0.114442	6.09589	0.023727
UCHL5_HUMAN	56	74	FKWQPGEEPAGSVVQDSRL	16	2130.06	UCH37_DEUBAD_UbPG	10	2140.25	0.166167	8.94333	0.181898	6.09115	0.022626
UCHL5_HUMAN	56	74	FKWQPGEEPAGSVVQDSRL	16	2130.06	UCH37_DEUBAD_UbPG	30	2140.9	0.081383	9.58969	0.109992	6.08937	0.022813
UCHL5_HUMAN	56	74	FKWQPGEEPAGSVVQDSRL	16	2130.06	UCH37_DEUBAD_UbPG	60	2141.06	0.053363	9.74894	0.091229	6.09032	0.02384
UCHL5_HUMAN	56	74	FKWQPGEEPAGSVVQDSRL	16	2130.06	UCH37_DEUBAD_UbPG	120	2141.93	0.615708	10.6235	0.620138	6.11371	0.019341
UCHL5_HUMAN	56	74	FKWQPGEEPAGSVVQDSRL	16	2130.06	UCH37_DEUBAD_UbPG plus K48 Ub2	0	2131.31	0.073994	0	0	6.11226	0.023687
UCHL5_HUMAN	56	74	FKWQPGEEPAGSVVQDSRL	16	2130.06	UCH37_DEUBAD_UbPG plus K48 Ub2	1	2140.07	0.170396	8.76141	0.185768	6.1408	0.010843
UCHL5_HUMAN	56	74	FKWQPGEEPAGSVVQDSRL	16	2130.06	UCH37_DEUBAD_UbPG plus K48 Ub2	10	2140.54	0.051777	9.23654	0.090311	6.1299	0.003497
UCHL5_HUMAN	56	74	FKWQPGEEPAGSVVQDSRL	16	2130.06	UCH37_DEUBAD_UbPG plus K48 Ub2	30	2141.35	0.445541	10.0401	0.451644	6.11526	0.01813
UCHL5_HUMAN	56	74	FKWQPGEEPAGSVVQDSRL	16	2130.06	UCH37_DEUBAD_UbPG plus K48 Ub2	60	2141.67	0.780269	10.3673	0.78377	6.11769	0.009437
UCHL5_HUMAN	56	74	FKWQPGEEPAGSVVQDSRL	16	2130.06	UCH37_DEUBAD_UbPG plus K48 Ub2	120	2142.53	0	11.2199	0.073994	6.13011	0
UCHL5_HUMAN	68	74	VVQDSRL	6	816.457	UCH37_DEUBAD UbPG plus K6/48 Ub3	0	816.985	0.105456	0	0	4.14982	0.028584
UCHL5_HUMAN	68	74	VVQDSRL	6	816.457	UCH37_DEUBAD UbPG plus K6/48 Ub3	1	820.227	0.057185	3.24138	0.119963	4.07927	0.005987
UCHL5_HUMAN	68	74	VVQDSRL	6	816.457	UCH37_DEUBAD UbPG plus K6/48 Ub3	10	820.236	0.040628	3.25102	0.113012	4.07499	0.002753
UCHL5_HUMAN	68	74	VVQDSRL	6	816.457	UCH37_DEUBAD UbPG plus K6/48 Ub3	30	820.221	0.043118	3.23549	0.113931	4.07574	0.002116
UCHL5_HUMAN	68	74	VVQDSRL	6	816.457	UCH37_DEUBAD UbPG plus K6/48 Ub3	60	820.253	0.047561	3.26767	0.115685	4.07534	0.002218
UCHL5_HUMAN	68	74	VVQDSRL	6	816.457	UCH37_DEUBAD UbPG plus K6/48 Ub3	120	820.247	0.033566	3.262	0.110669	4.07796	0.001289
UCHL5_HUMAN	68	74	VVQDSRL	6	816.457	UCH37_DEUBAD UbPG plus Ub	0	816.985	0.105456	0	0	4.14982	0.028584
UCHL5_HUMAN	68	74	VVQDSRL	6	816.457	UCH37_DEUBAD UbPG plus Ub	1	820.247	0.059069	3.262	0.120873	4.12241	0.009287
UCHL5_HUMAN	68	74	VVQDSRL	6	816.457	UCH37_DEUBAD UbPG plus Ub	10	820.253	0.089707	3.26793	0.13845	4.123	0.002931
UCHL5_HUMAN	68	74	VVQDSRL	6	816.457	UCH37_DEUBAD UbPG plus Ub	30	820.214	0.061328	3.22921	0.121992	4.11893	0.004564
UCHL5_HUMAN	68	74	VVQDSRL	6	816.457	UCH37_DEUBAD UbPG plus Ub	60	820.212	0.05586	3.22678	0.119337	4.12036	0.003123
UCHL5_HUMAN	68	74	VVQDSRL	6	816.457	UCH37_DEUBAD UbPG plus Ub	120	820.206	0.058157	3.22123	0.12043	4.11813	0.004142
UCHL5_HUMAN	68	74	VVQDSRL	6	816.457	UCH37_DEUBAD_UbPG	0	816.985	0.105456	0	0	4.14982	0.028584
UCHL5_HUMAN	68	74	VVQDSRL	6	816.457	UCH37_DEUBAD_UbPG	1	820.271	0.087175	3.28561	0.136823	4.14099	0.025149
UCHL5_HUMAN	68	74	VVQDSRL	6	816.457	UCH37_DEUBAD_UbPG	10	820.279	0.089738	3.29413	0.13847	4.13874	0.023039
UCHL5_HUMAN	68	74	VVQDSRL	6	816.457	UCH37_DEUBAD_UbPG	30	820.275	0.07851	3.28946	0.131472	4.13671	0.02609
UCHL5_HUMAN	68	74	VVQDSRL	6	816.457	UCH37_DEUBAD_UbPG	60	820.312	0.098401	3.32632	0.144235	4.13696	0.025631
UCHL5_HUMAN	68	74	VVQDSRL	6	816.457	UCH37_DEUBAD_UbPG	120	820.317	0.100001	3.33178	0.145332	4.13581	0.026383
UCHL5_HUMAN	68	74	VVQDSRL	6	816.457	UCH37_DEUBAD_UbPG plus K48 Ub2	0	816.985	0.105456	0	0	4.14982	0.028584
UCHL5_HUMAN	68	74	VVQDSRL	6	816.457	UCH37_DEUBAD_UbPG plus K48 Ub2	1	820.24	0.074691	3.25459	0.129228	4.15579	0.022551
UCHL5_HUMAN	68	74	VVQDSRL	6	816.457	UCH37_DEUBAD_UbPG plus K48 Ub2	10	820.254	0.06603	3.26875	0.124423	4.14585	0.024469
UCHL5_HUMAN	68	74	VVQDSRL	6	816.457	UCH37_DEUBAD_UbPG plus K48 Ub2	30	820.252	0.061014	3.26634	0.121835	4.14674	0.018351
UCHL5_HUMAN	68	74	VVQDSRL	6	816.457	UCH37_DEUBAD_UbPG plus K48 Ub2	60	820.276	0.052089	3.29126	0.117619	4.14246	0.019766
UCHL5_HUMAN	68	74	VVQDSRL	6	816.457	UCH37_DEUBAD_UbPG plus K48 Ub2	120	820.255	0.068547	3.27014	0.125776	4.14253	0.021869
UCHL5_HUMAN	79	86	FAKQVINN	7	933.515	UCH37_DEUBAD UbPG plus K6/48 Ub3	0	933.979	0.019232	0	0	3.8635	0.018432
UCHL5_HUMAN	79	86	FAKQVINN	7	933.515	UCH37_DEUBAD UbPG plus K6/48 Ub3	1	935.512	0.10655	1.53295	0.108272	3.80171	0.004552
UCHL5_HUMAN	79	86	FAKQVINN	7	933.515	UCH37_DEUBAD UbPG plus K6/48 Ub3	10	936.149	0.023292	2.17002	0.030205	3.79835	0.003806
UCHL5_HUMAN	79	86	FAKQVINN	7	933.515	UCH37_DEUBAD UbPG plus K6/48 Ub3	30	936.313	0.051335	2.33395	0.054819	3.80013	0.004014
UCHL5_HUMAN	79	86	FAKQVINN	7	933.515	UCH37_DEUBAD UbPG plus K6/48 Ub3	60	936.615	0.011127	2.6364	0.022219	3.80117	0.000846
UCHL5_HUMAN	79	86	FAKQVINN	7	933.515	UCH37_DEUBAD UbPG plus K6/48 Ub3	120	937.182	0.343857	3.20296	0.344394	3.79962	0.002462
UCHL5_HUMAN	79	86	FAKQVINN	7	933.515	UCH37_DEUBAD UbPG plus Ub	0	933.979	0.019232	0	0	3.8635	0.018432
UCHL5_HUMAN	79	86	FAKQVINN	7	933.515	UCH37_DEUBAD UbPG plus Ub	1	935.671	0.031347	1.69245	0.036776	3.84225	0.006118
UCHL5_HUMAN	79	86	FAKQVINN	7	933.515	UCH37_DEUBAD UbPG plus Ub	10	936.443	0.001081	2.46434	0.019262	3.84386	0.000882
UCHL5_HUMAN	79	86	FAKQVINN	7	933.515	UCH37_DEUBAD UbPG plus Ub	30	936.804	0.031888	2.82476	0.037238	3.83904	0.001587
UCHL5_HUMAN	79	86	FAKQVINN	7	933.515	UCH37_DEUBAD UbPG plus Ub	60	937.481	0.00824	3.50246	0.020922	3.83753	0.00519
UCHL5_HUMAN	79	86	FAKQVINN	7	933.515	UCH37_DEUBAD UbPG plus Ub	120	937.548	0.013496	3.56949	0.023494	3.83659	0.00262
UCHL5_HUMAN	79	86	FAKQVINN	7	933.515	UCH37_DEUBAD_UbPG	0	933.979	0.019232	0	0	3.8635	0.018432
UCHL5_HUMAN	79	86	FAKQVINN	7	933.515	UCH37_DEUBAD_UbPG	1	935.734	0.06132	1.75473	0.064265	3.85681	0.015415
UCHL5_HUMAN	79	86	FAKQVINN	7	933.515	UCH37_DEUBAD_UbPG	10	936.278	0.093656	2.29922	0.09561	3.85617	0.014751
UCHL5_HUMAN	79	86	FAKQVINN	7	933.515	UCH37_DEUBAD_UbPG	30	936.926	0	2.94753	0.019232	3.8625	0
UCHL5_HUMAN	79	86	FAKQVINN	7	933.515	UCH37_DEUBAD_UbPG	60	937.323	0.143809	3.34401	0.145089	3.85455	0.014892
UCHL5_HUMAN	79	86	FAKQVINN	7	933.515	UCH37_DEUBAD_UbPG	120	937.523	0.020179	3.54421	0.027876	3.85688	0.018112
UCHL5_HUMAN	79	86	FAKQVINN	7	933.515	UCH37_DEUBAD_UbPG plus K48 Ub2	0	933.979	0.019232	0	0	3.8635	0.018432
UCHL5_HUMAN	79	86	FAKQVINN	7	933.515	UCH37_DEUBAD_UbPG plus K48 Ub2	1	935.469	0.058901	1.49003	0.061961	3.86338	0.01333
UCHL5_HUMAN	79	86	FAKQVINN	7	933.515	UCH37_DEUBAD_UbPG plus K48 Ub2	10	936.093	0.07468	2.1138	0.077116	3.86116	0.015643
UCHL5_HUMAN	79	86	FAKQVINN	7	933.515	UCH37_DEUBAD_UbPG plus K48 Ub2	30	936.327	0.087832	2.34789	0.089913	3.85607	0.014133
UCHL5_HUMAN	79	86	FAKQVINN	7	933.515	UCH37_DEUBAD_UbPG plus K48 Ub2	60	936.532	0.033622	2.55315	0.038734	3.85698	0.013159
UCHL5_HUMAN	79	86	FAKQVINN	7	933.515	UCH37_DEUBAD_UbPG plus K48 Ub2	120	936.956	0.15421	2.97731	0.155405	3.85851	0.013073
UCHL5_HUMAN	79	87	FAKQVINNA	8	1004.55	UCH37_DEUBAD UbPG plus K6/48 Ub3	0	1005.02	0.013105	0	0	4.23188	0.022158
UCHL5_HUMAN	79	87	FAKQVINNA	8	1004.55	UCH37_DEUBAD UbPG plus K6/48 Ub3	1	1006.7	0.035061	1.68204	0.03743	4.1682	0.006493
UCHL5_HUMAN	79	87	FAKQVINNA	8	1004.55	UCH37_DEUBAD UbPG plus K6/48 Ub3	10	1006.87	0.015198	1.85255	0.020068	4.16427	0.002009
UCHL5_HUMAN	79	87	FAKQVINNA	8	1004.55	UCH37_DEUBAD UbPG plus K6/48 Ub3	30	1007.13	0.077539	2.10778	0.078638	4.16495	0.002457
UCHL5_HUMAN	79	87	FAKQVINNA	8	1004.55	UCH37_DEUBAD UbPG plus K6/48 Ub3	60	1007.39	0.028146	2.3687	0.031047	4.16214	0.002401
UCHL5_HUMAN	79	87	FAKQVINNA	8	1004.55	UCH37_DEUBAD UbPG plus K6/48 Ub3	120	1007.78	0.097272	2.75967	0.09815	4.16434	0.001294
UCHL5_HUMAN	79	87	FAKQVINNA	8	1004.55	UCH37_DEUBAD UbPG plus Ub	0	1005.02	0.013105	0	0	4.23188	0.022158
UCHL5_HUMAN	79	87	FAKQVINNA	8	1004.55	UCH37_DEUBAD UbPG plus Ub	1	1006.83	0.001907	1.81473	0.013243	4.21203	0.006253
UCHL5_HUMAN	79	87	FAKQVINNA	8	1004.55	UCH37_DEUBAD UbPG plus Ub	10	1007.38	0.037693	2.35748	0.039906	4.21114	0.003891
UCHL5_HUMAN	79	87	FAKQVINNA	8	1004.55	UCH37_DEUBAD UbPG plus Ub	30	1007.89	0.011763	2.86705	0.017609	4.20741	0.000666
UCHL5_HUMAN	79	87	FAKQVINNA	8	1004.55	UCH37_DEUBAD UbPG plus Ub	60	1008.35	0.088865	3.33492	0.089827	4.20664	0.002021
UCHL5_HUMAN	79	87	FAKQVINNA	8	1004.55	UCH37_DEUBAD UbPG plus Ub	120	1008.62	0.003863	3.60535	0.013662	4.20443	0.003285
UCHL5_HUMAN	79	87	FAKQVINNA	8	1004.55	UCH37_DEUBAD_UbPG	0	1005.02	0	0	0	4.20726	0
UCHL5_HUMAN	79	87	FAKQVINNA	8	1004.55	UCH37_DEUBAD_UbPG	1	1006.83	0	1.8078	0	4.21093	0
UCHL5_HUMAN	79	87	FAKQVINNA	8	1004.55	UCH37_DEUBAD_UbPG	10	1007.36	0	2.33676	0	4.20769	0
UCHL5_HUMAN	79	87	FAKQVINNA	8	1004.55	UCH37_DEUBAD_UbPG	30	1008.19	0	3.1706	0	4.20077	0
UCHL5_HUMAN	79	87	FAKQVINNA	8	1004.55	UCH37_DEUBAD_UbPG	60	1008.49	0	3.46858	0	4.20135	0
UCHL5_HUMAN	79	87	FAKQVINNA	8	1004.55	UCH37_DEUBAD_UbPG	120	1008.72	0	3.7026	0	4.19962	0
UCHL5_HUMAN	79	87	FAKQVINNA	8	1004.55	UCH37_DEUBAD_UbPG plus K48 Ub2	0	1005.02	0	0	0	4.20726	0
UCHL5_HUMAN	79	87	FAKQVINNA	8	1004.55	UCH37_DEUBAD_UbPG plus K48 Ub2	1	1006.59	0	1.57389	0	4.21325	0
UCHL5_HUMAN	79	87	FAKQVINNA	8	1004.55	UCH37_DEUBAD_UbPG plus K48 Ub2	10	1007	0	1.97648	0	4.20352	0
UCHL5_HUMAN	79	87	FAKQVINNA	8	1004.55	UCH37_DEUBAD_UbPG plus K48 Ub2	30	1007.15	0	2.13164	0	4.21046	0
UCHL5_HUMAN	79	87	FAKQVINNA	8	1004.55	UCH37_DEUBAD_UbPG plus K48 Ub2	120	1007.8	0	2.7753	0	4.20255	0
UCHL5_HUMAN	84	94	INNACATQAIV	10	1117.57	UCH37_DEUBAD UbPG plus K6/48 Ub3	0	1118.05	0.070356	0	0	5.08447	0.017478
UCHL5_HUMAN	84	94	INNACATQAIV	10	1117.57	UCH37_DEUBAD UbPG plus K6/48 Ub3	1	1120.89	0.15749	2.83822	0.172491	5.00017	0.005039
UCHL5_HUMAN	84	94	INNACATQAIV	10	1117.57	UCH37_DEUBAD UbPG plus K6/48 Ub3	10	1122.31	0.145072	4.26113	0.161232	4.99956	0.004172
UCHL5_HUMAN	84	94	INNACATQAIV	10	1117.57	UCH37_DEUBAD UbPG plus K6/48 Ub3	30	1122.93	0.141856	4.87823	0.158345	5.00392	0.004966
UCHL5_HUMAN	84	94	INNACATQAIV	10	1117.57	UCH37_DEUBAD UbPG plus K6/48 Ub3	60	1123.26	0.176676	5.20909	0.190169	5.00182	0.00336
UCHL5_HUMAN	84	94	INNACATQAIV	10	1117.57	UCH37_DEUBAD UbPG plus K6/48 Ub3	120	1123.36	0.282619	5.3088	0.291244	5.0032	0.002464
UCHL5_HUMAN	84	94	INNACATQAIV	10	1117.57	UCH37_DEUBAD UbPG plus Ub	0	1117.88	0.047195	0	0	5.084	0.018762
UCHL5_HUMAN	84	94	INNACATQAIV	10	1117.57	UCH37_DEUBAD UbPG plus Ub	1	1120.48	0	2.59772	0.047195	5.05057	0
UCHL5_HUMAN	84	94	INNACATQAIV	10	1117.57	UCH37_DEUBAD UbPG plus Ub	10	1121.85	0.0856	3.96806	0.097748	5.0565	0.002226
UCHL5_HUMAN	84	94	INNACATQAIV	10	1117.57	UCH37_DEUBAD UbPG plus Ub	30	1122.41	0.043235	4.52583	0.064005	5.05532	0.003308
UCHL5_HUMAN	84	94	INNACATQAIV	10	1117.57	UCH37_DEUBAD UbPG plus Ub	60	1122.56	0.009445	4.67402	0.048131	5.05417	0.000512
UCHL5_HUMAN	84	94	INNACATQAIV	10	1117.57	UCH37_DEUBAD UbPG plus Ub	120	1122.74	0.007622	4.8546	0.047807	5.05162	0.003749
UCHL5_HUMAN	84	94	INNACATQAIV	10	1117.57	UCH37_DEUBAD_UbPG	0	1118.05	0.070356	0	0	5.08447	0.017478
UCHL5_HUMAN	84	94	INNACATQAIV	10	1117.57	UCH37_DEUBAD_UbPG	1	1120.54	0.047829	2.49161	0.085074	5.09185	0.000647
UCHL5_HUMAN	84	94	INNACATQAIV	10	1117.57	UCH37_DEUBAD_UbPG	10	1121.76	0.084974	3.71005	0.11032	5.08739	0.001387
UCHL5_HUMAN	84	94	INNACATQAIV	10	1117.57	UCH37_DEUBAD_UbPG	30	1122.31	0.02765	4.25989	0.075594	5.0695	0.016473
UCHL5_HUMAN	84	94	INNACATQAIV	10	1117.57	UCH37_DEUBAD_UbPG	60	1122.73	0.182985	4.68603	0.196045	5.07515	0.015109
UCHL5_HUMAN	84	94	INNACATQAIV	10	1117.57	UCH37_DEUBAD_UbPG	120	1122.8	0.073171	4.75114	0.101508	5.07596	0.018918
UCHL5_HUMAN	84	94	INNACATQAIV	10	1117.57	UCH37_DEUBAD_UbPG plus K48 Ub2	0	1118.05	0.070356	0	0	5.08447	0.017478
UCHL5_HUMAN	84	94	INNACATQAIV	10	1117.57	UCH37_DEUBAD_UbPG plus K48 Ub2	1	1120.47	0.291573	2.4189	0.299942	5.01344	0.063844
UCHL5_HUMAN	84	94	INNACATQAIV	10	1117.57	UCH37_DEUBAD_UbPG plus K48 Ub2	10	1121.94	0.054054	3.89662	0.088723	5.06932	0.022307
UCHL5_HUMAN	84	94	INNACATQAIV	10	1117.57	UCH37_DEUBAD_UbPG plus K48 Ub2	30	1122.47	0.075479	4.42227	0.103185	5.06895	0.014233
UCHL5_HUMAN	84	94	INNACATQAIV	10	1117.57	UCH37_DEUBAD_UbPG plus K48 Ub2	60	1122.76	0.0953	4.71183	0.118457	5.0613	0.014863
UCHL5_HUMAN	84	94	INNACATQAIV	10	1117.57	UCH37_DEUBAD_UbPG plus K48 Ub2	120	1122.9	0.090901	4.85475	0.114948	5.06436	0.020121
UCHL5_HUMAN	96	103	VLLNCTHQ	7	927.472	UCH37_DEUBAD UbPG plus K6/48 Ub3	0	928.07	0.064966	0	0	4.67426	0.001102
UCHL5_HUMAN	96	103	VLLNCTHQ	7	927.472	UCH37_DEUBAD UbPG plus K6/48 Ub3	1	930.165	0.086092	2.09496	0.107854	4.59889	0.004673
UCHL5_HUMAN	96	103	VLLNCTHQ	7	927.472	UCH37_DEUBAD UbPG plus K6/48 Ub3	10	930.368	0.053277	2.29787	0.084018	4.59551	0.002691
UCHL5_HUMAN	96	103	VLLNCTHQ	7	927.472	UCH37_DEUBAD UbPG plus K6/48 Ub3	30	930.594	0.180903	2.52403	0.192215	4.59809	0.004541
UCHL5_HUMAN	96	103	VLLNCTHQ	7	927.472	UCH37_DEUBAD UbPG plus K6/48 Ub3	60	930.597	0.155716	2.52714	0.168725	4.59758	0.002525
UCHL5_HUMAN	96	103	VLLNCTHQ	7	927.472	UCH37_DEUBAD UbPG plus K6/48 Ub3	120	930.659	0	2.58855	0.064966	4.58964	0
UCHL5_HUMAN	96	103	VLLNCTHQ	7	927.472	UCH37_DEUBAD UbPG plus Ub	0	928.07	0.064966	0	0	4.67426	0.001102
UCHL5_HUMAN	96	103	VLLNCTHQ	7	927.472	UCH37_DEUBAD UbPG plus Ub	1	930.328	0.096111	2.25784	0.116008	4.65007	0.00904
UCHL5_HUMAN	96	103	VLLNCTHQ	7	927.472	UCH37_DEUBAD UbPG plus Ub	10	930.454	0.132925	2.38423	0.147951	4.64854	0.00424
UCHL5_HUMAN	96	103	VLLNCTHQ	7	927.472	UCH37_DEUBAD UbPG plus Ub	30	930.738	0.111635	2.66754	0.129162	4.64603	0.005443
UCHL5_HUMAN	96	103	VLLNCTHQ	7	927.472	UCH37_DEUBAD UbPG plus Ub	60	930.713	1.43042	2.64258	1.4319	4.6515	0.026427
UCHL5_HUMAN	96	103	VLLNCTHQ	7	927.472	UCH37_DEUBAD UbPG plus Ub	120	930.691	1.59221	2.62072	1.59354	4.64847	0.028217
UCHL5_HUMAN	96	103	VLLNCTHQ	7	927.472	UCH37_DEUBAD_UbPG	0	928.07	0.064966	0	0	4.67426	0.001102
UCHL5_HUMAN	96	103	VLLNCTHQ	7	927.472	UCH37_DEUBAD_UbPG	1	930.307	0.117364	2.23732	0.134145	4.66501	0.022894
UCHL5_HUMAN	96	103	VLLNCTHQ	7	927.472	UCH37_DEUBAD_UbPG	10	930.501	0.138538	2.43112	0.153014	4.66283	0.019409
UCHL5_HUMAN	96	103	VLLNCTHQ	7	927.472	UCH37_DEUBAD_UbPG	30	930.722	0.183517	2.65178	0.194677	4.67876	0.004409
UCHL5_HUMAN	96	103	VLLNCTHQ	7	927.472	UCH37_DEUBAD_UbPG	60	930.858	0.244734	2.78733	0.25321	4.66119	0.023104
UCHL5_HUMAN	96	103	VLLNCTHQ	7	927.472	UCH37_DEUBAD_UbPG	120	930.728	0	2.65738	0.064966	4.69377	0
UCHL5_HUMAN	96	103	VLLNCTHQ	7	927.472	UCH37_DEUBAD_UbPG plus K48 Ub2	0	928.07	0.064966	0	0	4.67426	0.001102
UCHL5_HUMAN	96	103	VLLNCTHQ	7	927.472	UCH37_DEUBAD_UbPG plus K48 Ub2	1	930.367	0.137461	2.29641	0.15204	4.67884	0.019811
UCHL5_HUMAN	96	103	VLLNCTHQ	7	927.472	UCH37_DEUBAD_UbPG plus K48 Ub2	10	930.62	0.143493	2.5501	0.157515	4.66718	0.021752
UCHL5_HUMAN	96	103	VLLNCTHQ	7	927.472	UCH37_DEUBAD_UbPG plus K48 Ub2	30	930.789	0.140178	2.71839	0.1545	4.67622	0.002614
UCHL5_HUMAN	96	103	VLLNCTHQ	7	927.472	UCH37_DEUBAD_UbPG plus K48 Ub2	60	930.762	0.19115	2.69181	0.201889	4.64463	0.017077
UCHL5_HUMAN	96	103	VLLNCTHQ	7	927.472	UCH37_DEUBAD_UbPG plus K48 Ub2	120	930.857	0.149671	2.78699	0.163163	4.68372	0.006633
UCHL5_HUMAN	96	107	VLLNCTHQDVHL	11	1391.71	UCH37_DEUBAD UbPG plus K6/48 Ub3	0	1392.53	0.057834	0	0	5.68098	0.034779
UCHL5_HUMAN	96	107	VLLNCTHQDVHL	11	1391.71	UCH37_DEUBAD UbPG plus K6/48 Ub3	1	1394.85	0.038439	2.31628	0.069443	5.58882	0.005875
UCHL5_HUMAN	96	107	VLLNCTHQDVHL	11	1391.71	UCH37_DEUBAD UbPG plus K6/48 Ub3	10	1395.17	0.023751	2.64176	0.062521	5.5817	0.002699
UCHL5_HUMAN	96	107	VLLNCTHQDVHL	11	1391.71	UCH37_DEUBAD UbPG plus K6/48 Ub3	30	1395.46	0.056283	2.92635	0.0807	5.5827	0.00266
UCHL5_HUMAN	96	107	VLLNCTHQDVHL	11	1391.71	UCH37_DEUBAD UbPG plus K6/48 Ub3	60	1395.62	0.07852	3.08323	0.09752	5.58547	0.001291
UCHL5_HUMAN	96	107	VLLNCTHQDVHL	11	1391.71	UCH37_DEUBAD UbPG plus K6/48 Ub3	120	1395.72	0.172753	3.19284	0.182176	5.58728	0.011634
UCHL5_HUMAN	96	107	VLLNCTHQDVHL	11	1391.71	UCH37_DEUBAD UbPG plus Ub	0	1392.53	0.057834	0	0	5.68098	0.034779
UCHL5_HUMAN	96	107	VLLNCTHQDVHL	11	1391.71	UCH37_DEUBAD UbPG plus Ub	1	1394.97	0.048336	2.43634	0.075373	5.6494	0.010482
UCHL5_HUMAN	96	107	VLLNCTHQDVHL	11	1391.71	UCH37_DEUBAD UbPG plus Ub	10	1395.27	0.037811	2.74309	0.069097	5.6492	0.003569
UCHL5_HUMAN	96	107	VLLNCTHQDVHL	11	1391.71	UCH37_DEUBAD UbPG plus Ub	30	1395.51	0.019774	2.98069	0.061121	5.64655	0.00374
UCHL5_HUMAN	96	107	VLLNCTHQDVHL	11	1391.71	UCH37_DEUBAD UbPG plus Ub	60	1395.9	0.165625	3.3724	0.175432	5.64949	0.003038
UCHL5_HUMAN	96	107	VLLNCTHQDVHL	11	1391.71	UCH37_DEUBAD UbPG plus Ub	120	1395.98	0.202661	3.44846	0.210752	5.64605	0.004176
UCHL5_HUMAN	96	107	VLLNCTHQDVHL	11	1391.71	UCH37_DEUBAD_UbPG	0	1392.53	0.057834	0	0	5.68098	0.034779
UCHL5_HUMAN	96	107	VLLNCTHQDVHL	11	1391.71	UCH37_DEUBAD_UbPG	1	1395.04	0.081669	2.50674	0.100073	5.66866	0.035246
UCHL5_HUMAN	96	107	VLLNCTHQDVHL	11	1391.71	UCH37_DEUBAD_UbPG	10	1395.37	0.098565	2.84094	0.11428	5.66844	0.032268
UCHL5_HUMAN	96	107	VLLNCTHQDVHL	11	1391.71	UCH37_DEUBAD_UbPG	30	1395.86	0.05684	3.32638	0.08109	5.67434	0.032145
UCHL5_HUMAN	96	107	VLLNCTHQDVHL	11	1391.71	UCH37_DEUBAD_UbPG	60	1395.82	0.056029	3.29024	0.080524	5.66597	0.035083
UCHL5_HUMAN	96	107	VLLNCTHQDVHL	11	1391.71	UCH37_DEUBAD_UbPG	120	1395.9	0.123514	3.36915	0.136383	5.64499	0.027144
UCHL5_HUMAN	96	107	VLLNCTHQDVHL	11	1391.71	UCH37_DEUBAD_UbPG plus K48 Ub2	0	1392.53	0.057834	0	0	5.68098	0.034779
UCHL5_HUMAN	96	107	VLLNCTHQDVHL	11	1391.71	UCH37_DEUBAD_UbPG plus K48 Ub2	1	1395.21	0.153115	2.67902	0.163673	5.68619	0.025649
UCHL5_HUMAN	96	107	VLLNCTHQDVHL	11	1391.71	UCH37_DEUBAD_UbPG plus K48 Ub2	10	1395.61	0.199432	3.07873	0.207648	5.67248	0.031168
UCHL5_HUMAN	96	107	VLLNCTHQDVHL	11	1391.71	UCH37_DEUBAD_UbPG plus K48 Ub2	30	1395.87	0.248871	3.34063	0.255503	5.67917	0.014561
UCHL5_HUMAN	96	107	VLLNCTHQDVHL	11	1391.71	UCH37_DEUBAD_UbPG plus K48 Ub2	60	1395.82	0.279557	3.2891	0.285477	5.64537	0.021126
UCHL5_HUMAN	96	107	VLLNCTHQDVHL	11	1391.71	UCH37_DEUBAD_UbPG plus K48 Ub2	120	1395.93	0.084606	3.39771	0.102483	5.6346	0.002107
UCHL5_HUMAN	96	110	VLLNCTHQDVHLGET	14	1678.82	UCH37_DEUBAD UbPG plus K6/48 Ub3	0	1679.85	0.077737	0	0	5.40093	0.022558
UCHL5_HUMAN	96	110	VLLNCTHQDVHLGET	14	1678.82	UCH37_DEUBAD UbPG plus K6/48 Ub3	1	1683.64	0.005104	3.78321	0.077904	5.31374	0.0074
UCHL5_HUMAN	96	110	VLLNCTHQDVHLGET	14	1678.82	UCH37_DEUBAD UbPG plus K6/48 Ub3	10	1684.05	0.036425	4.19027	0.085847	5.31098	0.002637
UCHL5_HUMAN	96	110	VLLNCTHQDVHLGET	14	1678.82	UCH37_DEUBAD UbPG plus K6/48 Ub3	30	1684.27	0.030909	4.41046	0.083656	5.31088	0.001217
UCHL5_HUMAN	96	110	VLLNCTHQDVHLGET	14	1678.82	UCH37_DEUBAD UbPG plus K6/48 Ub3	60	1684.52	0.143785	4.66272	0.163454	5.31452	0.00144
UCHL5_HUMAN	96	110	VLLNCTHQDVHLGET	14	1678.82	UCH37_DEUBAD UbPG plus K6/48 Ub3	120	1685.26	0	5.40609	0.077737	5.06222	0
UCHL5_HUMAN	96	110	VLLNCTHQDVHLGET	14	1678.82	UCH37_DEUBAD UbPG plus Ub	0	1679.85	0.077737	0	0	5.40093	0.022558
UCHL5_HUMAN	96	110	VLLNCTHQDVHLGET	14	1678.82	UCH37_DEUBAD UbPG plus Ub	1	1683.87	0.003566	4.01624	0.077819	5.38235	0.001768
UCHL5_HUMAN	96	110	VLLNCTHQDVHLGET	14	1678.82	UCH37_DEUBAD UbPG plus Ub	10	1684.17	0.013651	4.31949	0.078926	5.3765	0.000552
UCHL5_HUMAN	96	110	VLLNCTHQDVHLGET	14	1678.82	UCH37_DEUBAD UbPG plus Ub	30	1684.37	0.071262	4.51398	0.105458	5.37439	0.005791
UCHL5_HUMAN	96	110	VLLNCTHQDVHLGET	14	1678.82	UCH37_DEUBAD UbPG plus Ub	120	1684.77	0	4.91313	0.077737	5.36876	0
UCHL5_HUMAN	96	110	VLLNCTHQDVHLGET	14	1678.82	UCH37_DEUBAD_UbPG	0	1679.85	0.077737	0	0	5.40093	0.022558
UCHL5_HUMAN	96	110	VLLNCTHQDVHLGET	14	1678.82	UCH37_DEUBAD_UbPG	1	1683.93	0.105851	4.07785	0.13133	5.39434	0.022927
UCHL5_HUMAN	96	110	VLLNCTHQDVHLGET	14	1678.82	UCH37_DEUBAD_UbPG	10	1684.33	0.133353	4.47682	0.154357	5.392	0.021533
UCHL5_HUMAN	96	110	VLLNCTHQDVHLGET	14	1678.82	UCH37_DEUBAD_UbPG	30	1684.71	0.09287	4.85717	0.121111	5.40384	0.016198
UCHL5_HUMAN	96	110	VLLNCTHQDVHLGET	14	1678.82	UCH37_DEUBAD_UbPG	60	1684.73	0.100371	4.87415	0.126954	5.39041	0.023878
UCHL5_HUMAN	96	110	VLLNCTHQDVHLGET	14	1678.82	UCH37_DEUBAD_UbPG	120	1685.14	1.81395	5.28655	1.81562	5.38259	0.023531
UCHL5_HUMAN	96	110	VLLNCTHQDVHLGET	14	1678.82	UCH37_DEUBAD_UbPG plus K48 Ub2	0	1679.87	0.042134	0	0	5.39951	0.022762
UCHL5_HUMAN	96	110	VLLNCTHQDVHLGET	14	1678.82	UCH37_DEUBAD_UbPG plus K48 Ub2	1	1684.11	0.164764	4.23379	0.170066	5.4037	0.019237
UCHL5_HUMAN	96	110	VLLNCTHQDVHLGET	14	1678.82	UCH37_DEUBAD_UbPG plus K48 Ub2	10	1684.58	0.209134	4.70452	0.213336	5.39496	0.022695
UCHL5_HUMAN	96	110	VLLNCTHQDVHLGET	14	1678.82	UCH37_DEUBAD_UbPG plus K48 Ub2	30	1684.8	0.234488	4.92583	0.238244	5.3987	0.01099
UCHL5_HUMAN	96	110	VLLNCTHQDVHLGET	14	1678.82	UCH37_DEUBAD_UbPG plus K48 Ub2	60	1684.68	2.27374e-13	4.80466	0.042134	5.36279	0
UCHL5_HUMAN	96	110	VLLNCTHQDVHLGET	14	1678.82	UCH37_DEUBAD_UbPG plus K48 Ub2	120	1684.83	0	4.95383	0.042134	5.3636	0
UCHL5_HUMAN	96	111	VLLNCTHQDVHLGETL	15	1791.91	UCH37_DEUBAD UbPG plus K6/48 Ub3	0	1793.06	0.0903	0	0	6.07175	0.028454
UCHL5_HUMAN	96	111	VLLNCTHQDVHLGETL	15	1791.91	UCH37_DEUBAD UbPG plus K6/48 Ub3	1	1796.67	0.170958	3.60758	0.193341	5.97119	0.006089
UCHL5_HUMAN	96	111	VLLNCTHQDVHLGETL	15	1791.91	UCH37_DEUBAD UbPG plus K6/48 Ub3	10	1797.17	0.062814	4.10539	0.109999	5.96586	0.003126
UCHL5_HUMAN	96	111	VLLNCTHQDVHLGETL	15	1791.91	UCH37_DEUBAD UbPG plus K6/48 Ub3	30	1797.65	0.090906	4.589	0.128133	5.96884	0.001914
UCHL5_HUMAN	96	111	VLLNCTHQDVHLGETL	15	1791.91	UCH37_DEUBAD UbPG plus K6/48 Ub3	60	1797.96	0.054029	4.89561	0.10523	5.96868	0.002118
UCHL5_HUMAN	96	111	VLLNCTHQDVHLGETL	15	1791.91	UCH37_DEUBAD UbPG plus K6/48 Ub3	120	1798.29	0.095746	5.23162	0.131611	5.96834	0.003256
UCHL5_HUMAN	96	111	VLLNCTHQDVHLGETL	15	1791.91	UCH37_DEUBAD UbPG plus Ub	0	1793.06	0.0903	0	0	6.07175	0.028454
UCHL5_HUMAN	96	111	VLLNCTHQDVHLGETL	15	1791.91	UCH37_DEUBAD UbPG plus Ub	1	1796.86	0.025472	3.7989	0.093824	6.04777	0.002287
UCHL5_HUMAN	96	111	VLLNCTHQDVHLGETL	15	1791.91	UCH37_DEUBAD UbPG plus Ub	10	1797.44	0.035876	4.37827	0.097166	6.03562	0.001246
UCHL5_HUMAN	96	111	VLLNCTHQDVHLGETL	15	1791.91	UCH37_DEUBAD UbPG plus Ub	30	1797.93	0.013017	4.86591	0.091233	6.03536	0.00635
UCHL5_HUMAN	96	111	VLLNCTHQDVHLGETL	15	1791.91	UCH37_DEUBAD UbPG plus Ub	60	1798.27	0.167968	5.20555	0.190702	6.03192	0.006369
UCHL5_HUMAN	96	111	VLLNCTHQDVHLGETL	15	1791.91	UCH37_DEUBAD UbPG plus Ub	120	1798.49	0.047571	5.43329	0.102064	6.02905	0.004338
UCHL5_HUMAN	96	111	VLLNCTHQDVHLGETL	15	1791.91	UCH37_DEUBAD_UbPG	0	1793.06	0.0903	0	0	6.07175	0.028454
UCHL5_HUMAN	96	111	VLLNCTHQDVHLGETL	15	1791.91	UCH37_DEUBAD_UbPG	1	1796.99	0.080253	3.93296	0.120808	6.0559	0.028759
UCHL5_HUMAN	96	111	VLLNCTHQDVHLGETL	15	1791.91	UCH37_DEUBAD_UbPG	10	1797.72	0.14906	4.65873	0.174279	6.05321	0.025297
UCHL5_HUMAN	96	111	VLLNCTHQDVHLGETL	15	1791.91	UCH37_DEUBAD_UbPG	30	1798.42	0.106601	5.35916	0.139707	6.06961	0.024458
UCHL5_HUMAN	96	111	VLLNCTHQDVHLGETL	15	1791.91	UCH37_DEUBAD_UbPG	60	1798.53	0	5.46602	0.0903	6.08237	0
UCHL5_HUMAN	96	111	VLLNCTHQDVHLGETL	15	1791.91	UCH37_DEUBAD_UbPG	120	1798.49	0.194283	5.42856	0.214243	6.03905	0.027628
UCHL5_HUMAN	96	111	VLLNCTHQDVHLGETL	15	1791.91	UCH37_DEUBAD_UbPG plus K48 Ub2	0	1793.06	0.0903	0	0	6.07175	0.028454
UCHL5_HUMAN	96	111	VLLNCTHQDVHLGETL	15	1791.91	UCH37_DEUBAD_UbPG plus K48 Ub2	1	1797.25	0.080634	4.19052	0.121062	6.08541	0.002468
UCHL5_HUMAN	96	111	VLLNCTHQDVHLGETL	15	1791.91	UCH37_DEUBAD_UbPG plus K48 Ub2	10	1797.96	0.039922	4.90415	0.098732	6.08296	0.001402
UCHL5_HUMAN	96	111	VLLNCTHQDVHLGETL	15	1791.91	UCH37_DEUBAD_UbPG plus K48 Ub2	30	1798.25	0.22667	5.19139	0.243995	6.06993	0.016263
UCHL5_HUMAN	96	111	VLLNCTHQDVHLGETL	15	1791.91	UCH37_DEUBAD_UbPG plus K48 Ub2	60	1798.42	0.304512	5.35847	0.317618	6.03783	0.023942
UCHL5_HUMAN	96	111	VLLNCTHQDVHLGETL	15	1791.91	UCH37_DEUBAD_UbPG plus K48 Ub2	120	1798.79	0.579732	5.72742	0.586722	6.03935	0.025185
UCHL5_HUMAN	96	113	VLLNCTHQDVHLGETLSE	17	2007.98	UCH37_DEUBAD UbPG plus K6/48 Ub3	0	2009.26	0.137267	0	0	5.94428	0.230091
UCHL5_HUMAN	96	113	VLLNCTHQDVHLGETLSE	17	2007.98	UCH37_DEUBAD UbPG plus K6/48 Ub3	1	2013.27	0.094214	4.00982	0.166489	5.76954	0.002949
UCHL5_HUMAN	96	113	VLLNCTHQDVHLGETLSE	17	2007.98	UCH37_DEUBAD UbPG plus K6/48 Ub3	10	2013.91	0.037555	4.65426	0.142312	5.76792	0.003926
UCHL5_HUMAN	96	113	VLLNCTHQDVHLGETLSE	17	2007.98	UCH37_DEUBAD UbPG plus K6/48 Ub3	30	2014.7	0.06438	5.44159	0.151615	5.76642	0.00353
UCHL5_HUMAN	96	113	VLLNCTHQDVHLGETLSE	17	2007.98	UCH37_DEUBAD UbPG plus K6/48 Ub3	60	2014.84	0	5.58124	0.137267	5.77084	0
UCHL5_HUMAN	96	113	VLLNCTHQDVHLGETLSE	17	2007.98	UCH37_DEUBAD UbPG plus K6/48 Ub3	120	2015.63	0.119219	6.37593	0.181811	5.82208	0.199742
UCHL5_HUMAN	96	113	VLLNCTHQDVHLGETLSE	17	2007.98	UCH37_DEUBAD UbPG plus Ub	0	2009.26	0.137267	0	0	5.94428	0.230091
UCHL5_HUMAN	96	113	VLLNCTHQDVHLGETLSE	17	2007.98	UCH37_DEUBAD UbPG plus Ub	1	2013.37	0.006937	4.10804	0.137442	5.82423	0.005257
UCHL5_HUMAN	96	113	VLLNCTHQDVHLGETLSE	17	2007.98	UCH37_DEUBAD UbPG plus Ub	10	2014.42	0.032659	5.16786	0.141099	5.83039	0.041243
UCHL5_HUMAN	96	113	VLLNCTHQDVHLGETLSE	17	2007.98	UCH37_DEUBAD UbPG plus Ub	30	2014.86	0	5.6012	0.137267	5.82287	0
UCHL5_HUMAN	96	113	VLLNCTHQDVHLGETLSE	17	2007.98	UCH37_DEUBAD UbPG plus Ub	60	2015.77	0	6.50981	0.137267	5.80951	0
UCHL5_HUMAN	96	113	VLLNCTHQDVHLGETLSE	17	2007.98	UCH37_DEUBAD UbPG plus Ub	120	2017.25	0.252979	7.99177	0.287821	5.82492	0.002615
UCHL5_HUMAN	96	113	VLLNCTHQDVHLGETLSE	17	2007.98	UCH37_DEUBAD_UbPG	0	2009.26	0.137267	0	0	5.94428	0.230091
UCHL5_HUMAN	96	113	VLLNCTHQDVHLGETLSE	17	2007.98	UCH37_DEUBAD_UbPG	1	2013.71	0.047923	4.45236	0.145392	5.8398	0.018982
UCHL5_HUMAN	96	113	VLLNCTHQDVHLGETLSE	17	2007.98	UCH37_DEUBAD_UbPG	10	2014.72	0	5.45827	0.137267	5.85262	0
UCHL5_HUMAN	96	113	VLLNCTHQDVHLGETLSE	17	2007.98	UCH37_DEUBAD_UbPG	30	2015.6	0.24932	6.34237	0.284609	5.84612	0.014255
UCHL5_HUMAN	96	113	VLLNCTHQDVHLGETLSE	17	2007.98	UCH37_DEUBAD_UbPG	60	2015.77	0.001764	6.51262	0.137278	5.8607	0.048006
UCHL5_HUMAN	96	113	VLLNCTHQDVHLGETLSE	17	2007.98	UCH37_DEUBAD_UbPG	120	2016.73	0.338384	7.46872	0.365166	5.85794	0.003281
UCHL5_HUMAN	96	113	VLLNCTHQDVHLGETLSE	17	2007.98	UCH37_DEUBAD_UbPG plus K48 Ub2	0	2009.26	0.137267	0	0	5.94428	0.230091
UCHL5_HUMAN	96	113	VLLNCTHQDVHLGETLSE	17	2007.98	UCH37_DEUBAD_UbPG plus K48 Ub2	1	2013.79	0.204499	4.52922	0.246297	5.8646	0.004271
UCHL5_HUMAN	96	113	VLLNCTHQDVHLGETLSE	17	2007.98	UCH37_DEUBAD_UbPG plus K48 Ub2	10	2014.72	0.057118	5.46713	0.148677	5.85564	0.000502
UCHL5_HUMAN	96	113	VLLNCTHQDVHLGETLSE	17	2007.98	UCH37_DEUBAD_UbPG plus K48 Ub2	30	2015.15	0.372313	5.8947	0.396811	5.84449	0.008798
UCHL5_HUMAN	96	113	VLLNCTHQDVHLGETLSE	17	2007.98	UCH37_DEUBAD_UbPG plus K48 Ub2	60	2015.56	0.655957	6.3062	0.670166	5.82521	0.014462
UCHL5_HUMAN	96	113	VLLNCTHQDVHLGETLSE	17	2007.98	UCH37_DEUBAD_UbPG plus K48 Ub2	120	2016.39	0	7.13723	0.137267	5.8428	0
UCHL5_HUMAN	98	107	LNCTHQDVHL	9	1179.56	UCH37_DEUBAD UbPG plus K6/48 Ub3	0	1180.55	0.060568	0	0	4.85783	0.032614
UCHL5_HUMAN	98	107	LNCTHQDVHL	9	1179.56	UCH37_DEUBAD UbPG plus K6/48 Ub3	1	1182.57	0.384794	2.0138	0.389531	4.75517	0.00469
UCHL5_HUMAN	98	107	LNCTHQDVHL	9	1179.56	UCH37_DEUBAD UbPG plus K6/48 Ub3	10	1182.86	0.032381	2.30439	0.06868	4.75366	0.003481
UCHL5_HUMAN	98	107	LNCTHQDVHL	9	1179.56	UCH37_DEUBAD UbPG plus K6/48 Ub3	30	1183.06	0.051588	2.50559	0.07956	4.75508	0.002746
UCHL5_HUMAN	98	107	LNCTHQDVHL	9	1179.56	UCH37_DEUBAD UbPG plus K6/48 Ub3	60	1183.18	0.09063	2.62585	0.109006	4.75716	0.000753
UCHL5_HUMAN	98	107	LNCTHQDVHL	9	1179.56	UCH37_DEUBAD UbPG plus K6/48 Ub3	120	1183.32	0.026936	2.76844	0.066287	4.75846	0.001071
UCHL5_HUMAN	98	107	LNCTHQDVHL	9	1179.56	UCH37_DEUBAD UbPG plus Ub	0	1180.55	0.060568	0	0	4.85783	0.032614
UCHL5_HUMAN	98	107	LNCTHQDVHL	9	1179.56	UCH37_DEUBAD UbPG plus Ub	1	1182.76	0.03966	2.20637	0.072397	4.82048	0.007631
UCHL5_HUMAN	98	107	LNCTHQDVHL	9	1179.56	UCH37_DEUBAD UbPG plus Ub	10	1182.95	0.027965	2.40088	0.066712	4.82242	0.002167
UCHL5_HUMAN	98	107	LNCTHQDVHL	9	1179.56	UCH37_DEUBAD UbPG plus Ub	30	1183.16	0.025853	2.61086	0.065855	4.81858	0.003403
UCHL5_HUMAN	98	107	LNCTHQDVHL	9	1179.56	UCH37_DEUBAD UbPG plus Ub	60	1183.42	0.097982	2.86439	0.115191	4.81968	0.002379
UCHL5_HUMAN	98	107	LNCTHQDVHL	9	1179.56	UCH37_DEUBAD UbPG plus Ub	120	1183.44	0.015046	2.88513	0.062409	4.81892	0.002939
UCHL5_HUMAN	98	107	LNCTHQDVHL	9	1179.56	UCH37_DEUBAD_UbPG	0	1180.55	0.060568	0	0	4.85783	0.032614
UCHL5_HUMAN	98	107	LNCTHQDVHL	9	1179.56	UCH37_DEUBAD_UbPG	1	1182.81	0.088742	2.25915	0.107441	4.84811	0.032693
UCHL5_HUMAN	98	107	LNCTHQDVHL	9	1179.56	UCH37_DEUBAD_UbPG	10	1183.04	0.097048	2.484	0.114398	4.84712	0.030657
UCHL5_HUMAN	98	107	LNCTHQDVHL	9	1179.56	UCH37_DEUBAD_UbPG	30	1183.36	0.310528	2.8085	0.316379	4.86491	0.020785
UCHL5_HUMAN	98	107	LNCTHQDVHL	9	1179.56	UCH37_DEUBAD_UbPG	60	1183.4	0.093583	2.85073	0.111474	4.84627	0.033311
UCHL5_HUMAN	98	107	LNCTHQDVHL	9	1179.56	UCH37_DEUBAD_UbPG	120	1183.31	0.141054	2.75898	0.153508	4.83135	0.029546
UCHL5_HUMAN	98	107	LNCTHQDVHL	9	1179.56	UCH37_DEUBAD_UbPG plus K48 Ub2	0	1180.55	0.060568	0	0	4.85783	0.032614
UCHL5_HUMAN	98	107	LNCTHQDVHL	9	1179.56	UCH37_DEUBAD_UbPG plus K48 Ub2	1	1183	0.04738	2.4481	0.076898	4.88238	0.00225
UCHL5_HUMAN	98	107	LNCTHQDVHL	9	1179.56	UCH37_DEUBAD_UbPG plus K48 Ub2	10	1183.18	0.120879	2.63067	0.135204	4.85541	0.030741
UCHL5_HUMAN	98	107	LNCTHQDVHL	9	1179.56	UCH37_DEUBAD_UbPG plus K48 Ub2	30	1183.45	0.165597	2.89537	0.176326	4.86191	0.019613
UCHL5_HUMAN	98	107	LNCTHQDVHL	9	1179.56	UCH37_DEUBAD_UbPG plus K48 Ub2	60	1183.45	0.205733	2.89861	0.214463	4.83094	0.02808
UCHL5_HUMAN	98	107	LNCTHQDVHL	9	1179.56	UCH37_DEUBAD_UbPG plus K48 Ub2	120	1183.51	0.091192	2.95467	0.109473	4.8318	0.027915
UCHL5_HUMAN	98	110	LNCTHQDVHLGET	12	1466.67	UCH37_DEUBAD UbPG plus K6/48 Ub3	0	1467.63	0.072397	0	0	4.58955	0.017486
UCHL5_HUMAN	98	110	LNCTHQDVHLGET	12	1466.67	UCH37_DEUBAD UbPG plus K6/48 Ub3	1	1471.43	0.024437	3.80362	0.07641	4.51057	0.003997
UCHL5_HUMAN	98	110	LNCTHQDVHLGET	12	1466.67	UCH37_DEUBAD UbPG plus K6/48 Ub3	10	1471.7	0.019384	4.07764	0.074947	4.50821	0.002796
UCHL5_HUMAN	98	110	LNCTHQDVHLGET	12	1466.67	UCH37_DEUBAD UbPG plus K6/48 Ub3	30	1471.88	0.041909	4.25306	0.083652	4.5098	0.002217
UCHL5_HUMAN	98	110	LNCTHQDVHLGET	12	1466.67	UCH37_DEUBAD UbPG plus K6/48 Ub3	60	1472.02	0.046508	4.39227	0.086048	4.51144	0.000999
UCHL5_HUMAN	98	110	LNCTHQDVHLGET	12	1466.67	UCH37_DEUBAD UbPG plus K6/48 Ub3	120	1472.16	0.070065	4.53446	0.100749	4.51234	0.001075
UCHL5_HUMAN	98	110	LNCTHQDVHLGET	12	1466.67	UCH37_DEUBAD UbPG plus Ub	0	1467.63	0.072397	0	0	4.58955	0.017486
UCHL5_HUMAN	98	110	LNCTHQDVHLGET	12	1466.67	UCH37_DEUBAD UbPG plus Ub	1	1471.56	0.052268	3.93494	0.089293	4.57001	0.00527
UCHL5_HUMAN	98	110	LNCTHQDVHLGET	12	1466.67	UCH37_DEUBAD UbPG plus Ub	10	1471.9	0.128928	4.27043	0.147864	4.56847	0.004527
UCHL5_HUMAN	98	110	LNCTHQDVHLGET	12	1466.67	UCH37_DEUBAD UbPG plus Ub	30	1472.03	0.085312	4.39944	0.111891	4.56535	0.001349
UCHL5_HUMAN	98	110	LNCTHQDVHLGET	12	1466.67	UCH37_DEUBAD UbPG plus Ub	60	1472.22	0.128761	4.58988	0.147719	4.56706	0.002482
UCHL5_HUMAN	98	110	LNCTHQDVHLGET	12	1466.67	UCH37_DEUBAD UbPG plus Ub	120	1472.21	0.034036	4.58212	0.079999	4.56893	0.000306
UCHL5_HUMAN	98	110	LNCTHQDVHLGET	12	1466.67	UCH37_DEUBAD_UbPG	0	1467.63	0.072397	0	0	4.58955	0.017486
UCHL5_HUMAN	98	110	LNCTHQDVHLGET	12	1466.67	UCH37_DEUBAD_UbPG	1	1471.83	0.121278	4.20597	0.141244	4.60061	0.000179
UCHL5_HUMAN	98	110	LNCTHQDVHLGET	12	1466.67	UCH37_DEUBAD_UbPG	10	1471.92	0.123567	4.29202	0.143214	4.57988	0.015294
UCHL5_HUMAN	98	110	LNCTHQDVHLGET	12	1466.67	UCH37_DEUBAD_UbPG	30	1472.37	0.159949	4.74625	0.175571	4.58652	0.012034
UCHL5_HUMAN	98	110	LNCTHQDVHLGET	12	1466.67	UCH37_DEUBAD_UbPG	60	1472.26	0.093742	4.63828	0.118444	4.57818	0.016348
UCHL5_HUMAN	98	110	LNCTHQDVHLGET	12	1466.67	UCH37_DEUBAD_UbPG	120	1472.35	0.741875	4.72828	0.745399	4.60079	0.002208
UCHL5_HUMAN	98	110	LNCTHQDVHLGET	12	1466.67	UCH37_DEUBAD_UbPG plus K48 Ub2	0	1467.63	0.072397	0	0	4.58955	0.017486
UCHL5_HUMAN	98	110	LNCTHQDVHLGET	12	1466.67	UCH37_DEUBAD_UbPG plus K48 Ub2	1	1471.81	0.129917	4.18104	0.148727	4.59141	0.015201
UCHL5_HUMAN	98	110	LNCTHQDVHLGET	12	1466.67	UCH37_DEUBAD_UbPG plus K48 Ub2	10	1472.19	0.193447	4.56049	0.20655	4.58313	0.016267
UCHL5_HUMAN	98	110	LNCTHQDVHLGET	12	1466.67	UCH37_DEUBAD_UbPG plus K48 Ub2	30	1472.3	0.107219	4.67464	0.129372	4.58686	0.009065
UCHL5_HUMAN	98	110	LNCTHQDVHLGET	12	1466.67	UCH37_DEUBAD_UbPG plus K48 Ub2	60	1472.37	0.218746	4.74024	0.230415	4.56813	0.012607
UCHL5_HUMAN	98	110	LNCTHQDVHLGET	12	1466.67	UCH37_DEUBAD_UbPG plus K48 Ub2	120	1472.43	0.116754	4.80298	0.137379	4.56899	0.014473
UCHL5_HUMAN	98	111	LNCTHQDVHLGETL	13	1579.75	UCH37_DEUBAD UbPG plus K6/48 Ub3	0	1581.02	0.423998	0	0	5.44435	0.097886
UCHL5_HUMAN	98	111	LNCTHQDVHLGETL	13	1579.75	UCH37_DEUBAD UbPG plus K6/48 Ub3	1	1584.46	0.074132	3.43679	0.43043	5.35073	0.007063
UCHL5_HUMAN	98	111	LNCTHQDVHLGETL	13	1579.75	UCH37_DEUBAD UbPG plus K6/48 Ub3	10	1584.91	0.060009	3.88662	0.428224	5.34647	0.002703
UCHL5_HUMAN	98	111	LNCTHQDVHLGETL	13	1579.75	UCH37_DEUBAD UbPG plus K6/48 Ub3	30	1585.31	0.066169	4.28393	0.42913	5.34732	0.002429
UCHL5_HUMAN	98	111	LNCTHQDVHLGETL	13	1579.75	UCH37_DEUBAD UbPG plus K6/48 Ub3	60	1585.75	0.201167	4.72129	0.4693	5.34594	0.008524
UCHL5_HUMAN	98	111	LNCTHQDVHLGETL	13	1579.75	UCH37_DEUBAD UbPG plus K6/48 Ub3	120	1585.8	0.087763	4.77244	0.432986	5.34405	0.002933
UCHL5_HUMAN	98	111	LNCTHQDVHLGETL	13	1579.75	UCH37_DEUBAD UbPG plus Ub	0	1580.92	0.247617	0	0	5.44579	0.091824
UCHL5_HUMAN	98	111	LNCTHQDVHLGETL	13	1579.75	UCH37_DEUBAD UbPG plus Ub	1	1584.67	0.074201	3.74628	0.258496	5.41879	0.006103
UCHL5_HUMAN	98	111	LNCTHQDVHLGETL	13	1579.75	UCH37_DEUBAD UbPG plus Ub	10	1585.16	0.045122	4.24393	0.251695	5.4174	0.001221
UCHL5_HUMAN	98	111	LNCTHQDVHLGETL	13	1579.75	UCH37_DEUBAD UbPG plus Ub	30	1585.57	0.039928	4.65474	0.250816	5.41451	0.005125
UCHL5_HUMAN	98	111	LNCTHQDVHLGETL	13	1579.75	UCH37_DEUBAD UbPG plus Ub	60	1585.85	0.059882	4.92521	0.254755	5.41235	0.002456
UCHL5_HUMAN	98	111	LNCTHQDVHLGETL	13	1579.75	UCH37_DEUBAD UbPG plus Ub	120	1585.98	0.040041	5.05804	0.250833	5.40382	0.003578
UCHL5_HUMAN	98	111	LNCTHQDVHLGETL	13	1579.75	UCH37_DEUBAD_UbPG	0	1580.92	0.247617	0	0	5.44579	0.091824
UCHL5_HUMAN	98	111	LNCTHQDVHLGETL	13	1579.75	UCH37_DEUBAD_UbPG	1	1584.89	0.067564	3.9708	0.256669	5.46673	0.001192
UCHL5_HUMAN	98	111	LNCTHQDVHLGETL	13	1579.75	UCH37_DEUBAD_UbPG	10	1585.34	0.068695	4.41945	0.256969	5.46724	0.006562
UCHL5_HUMAN	98	111	LNCTHQDVHLGETL	13	1579.75	UCH37_DEUBAD_UbPG	30	1585.95	0.086562	5.03032	0.262311	5.40281	0.000277
UCHL5_HUMAN	98	111	LNCTHQDVHLGETL	13	1579.75	UCH37_DEUBAD_UbPG	120	1585.96	0.25653	5.03612	0.356541	5.41015	0.025481
UCHL5_HUMAN	98	111	LNCTHQDVHLGETL	13	1579.75	UCH37_DEUBAD_UbPG plus K48 Ub2	0	1580.92	0.247617	0	0	5.44579	0.091824
UCHL5_HUMAN	98	111	LNCTHQDVHLGETL	13	1579.75	UCH37_DEUBAD_UbPG plus K48 Ub2	1	1584.67	0.067191	3.75227	0.256571	5.44732	0.027902
UCHL5_HUMAN	98	111	LNCTHQDVHLGETL	13	1579.75	UCH37_DEUBAD_UbPG plus K48 Ub2	10	1585.42	0.216066	4.50235	0.328632	5.44428	0.027898
UCHL5_HUMAN	98	111	LNCTHQDVHLGETL	13	1579.75	UCH37_DEUBAD_UbPG plus K48 Ub2	30	1585.61	0.33696	4.69154	0.418158	5.44802	0.0186
UCHL5_HUMAN	98	111	LNCTHQDVHLGETL	13	1579.75	UCH37_DEUBAD_UbPG plus K48 Ub2	60	1585.72	0.168275	4.80031	0.299384	5.40515	0.011958
UCHL5_HUMAN	98	111	LNCTHQDVHLGETL	13	1579.75	UCH37_DEUBAD_UbPG plus K48 Ub2	120	1586.06	0.217728	5.14243	0.329726	5.41234	0.020489
UCHL5_HUMAN	98	113	LNCTHQDVHLGETLSE	15	1795.83	UCH37_DEUBAD UbPG plus K6/48 Ub3	0	1796.74	0.02282	0	0	5.79805	0.026661
UCHL5_HUMAN	98	113	LNCTHQDVHLGETLSE	15	1795.83	UCH37_DEUBAD UbPG plus K6/48 Ub3	1	1803.09	0.399124	6.34456	0.399776	5.72705	0.002576
UCHL5_HUMAN	98	113	LNCTHQDVHLGETLSE	15	1795.83	UCH37_DEUBAD UbPG plus K6/48 Ub3	10	1803.64	0.268246	6.90053	0.269215	5.71405	0.006554
UCHL5_HUMAN	98	113	LNCTHQDVHLGETLSE	15	1795.83	UCH37_DEUBAD UbPG plus K6/48 Ub3	30	1804.26	0.114237	7.51327	0.116494	5.71332	0.004371
UCHL5_HUMAN	98	113	LNCTHQDVHLGETLSE	15	1795.83	UCH37_DEUBAD UbPG plus K6/48 Ub3	60	1804.68	0.159926	7.93245	0.161545	5.71099	0.006997
UCHL5_HUMAN	98	113	LNCTHQDVHLGETLSE	15	1795.83	UCH37_DEUBAD UbPG plus K6/48 Ub3	120	1804.87	0.1079	8.12622	0.110287	5.71444	0.004007
UCHL5_HUMAN	98	113	LNCTHQDVHLGETLSE	15	1795.83	UCH37_DEUBAD UbPG plus Ub	0	1796.81	0.169314	0	0	5.80108	0.0248
UCHL5_HUMAN	98	113	LNCTHQDVHLGETLSE	15	1795.83	UCH37_DEUBAD UbPG plus Ub	1	1802.48	0.17906	5.67958	0.246434	5.77426	0.011758
UCHL5_HUMAN	98	113	LNCTHQDVHLGETLSE	15	1795.83	UCH37_DEUBAD UbPG plus Ub	10	1803.56	0.252118	6.75211	0.303695	5.76764	0.008118
UCHL5_HUMAN	98	113	LNCTHQDVHLGETLSE	15	1795.83	UCH37_DEUBAD UbPG plus Ub	30	1804.03	0.222231	7.22164	0.279381	5.76822	0.00544
UCHL5_HUMAN	98	113	LNCTHQDVHLGETLSE	15	1795.83	UCH37_DEUBAD UbPG plus Ub	60	1804.19	0	7.38781	0.169314	5.19934	0
UCHL5_HUMAN	98	113	LNCTHQDVHLGETLSE	15	1795.83	UCH37_DEUBAD UbPG plus Ub	120	1804.25	0	7.44966	0.169314	5.19611	0
UCHL5_HUMAN	98	113	LNCTHQDVHLGETLSE	15	1795.83	UCH37_DEUBAD_UbPG	0	1796.74	0.02282	0	0	5.79805	0.026661
UCHL5_HUMAN	98	113	LNCTHQDVHLGETLSE	15	1795.83	UCH37_DEUBAD_UbPG	1	1802.6	0.295474	5.85234	0.296354	5.7972	0.017428
UCHL5_HUMAN	98	113	LNCTHQDVHLGETLSE	15	1795.83	UCH37_DEUBAD_UbPG	10	1803.2	0.322521	6.46135	0.323327	5.79832	0.014946
UCHL5_HUMAN	98	113	LNCTHQDVHLGETLSE	15	1795.83	UCH37_DEUBAD_UbPG	30	1804.16	0.831559	7.41428	0.831872	5.81216	0.00168
UCHL5_HUMAN	98	113	LNCTHQDVHLGETLSE	15	1795.83	UCH37_DEUBAD_UbPG	60	1804.4	0.365161	7.65448	0.365873	5.7787	0.026617
UCHL5_HUMAN	98	113	LNCTHQDVHLGETLSE	15	1795.83	UCH37_DEUBAD_UbPG	120	1804.72	0.054947	7.97601	0.059497	5.7708	0.022669
UCHL5_HUMAN	98	113	LNCTHQDVHLGETLSE	15	1795.83	UCH37_DEUBAD_UbPG plus K48 Ub2	0	1796.81	0.169314	0	0	5.80108	0.0248
UCHL5_HUMAN	98	113	LNCTHQDVHLGETLSE	15	1795.83	UCH37_DEUBAD_UbPG plus K48 Ub2	1	1802.78	0.286317	5.97487	0.332632	5.79765	0.022914
UCHL5_HUMAN	98	113	LNCTHQDVHLGETLSE	15	1795.83	UCH37_DEUBAD_UbPG plus K48 Ub2	10	1803.45	0.405849	6.64178	0.43975	5.80807	0.010356
UCHL5_HUMAN	98	113	LNCTHQDVHLGETLSE	15	1795.83	UCH37_DEUBAD_UbPG plus K48 Ub2	30	1804.12	0.595105	7.31028	0.618722	5.2926	0.163534
UCHL5_HUMAN	98	113	LNCTHQDVHLGETLSE	15	1795.83	UCH37_DEUBAD_UbPG plus K48 Ub2	60	1804.27	0.902441	7.46112	0.918186	5.58301	0.259578
UCHL5_HUMAN	98	113	LNCTHQDVHLGETLSE	15	1795.83	UCH37_DEUBAD_UbPG plus K48 Ub2	120	1804.46	0.017249	7.65946	0.17019	5.22691	0.001212
UCHL5_HUMAN	99	107	NCTHQDVHL	8	1066.47	UCH37_DEUBAD UbPG plus K6/48 Ub3	0	1067.26	0.045398	0	0	4.85491	0.032793
UCHL5_HUMAN	99	107	NCTHQDVHL	8	1066.47	UCH37_DEUBAD UbPG plus K6/48 Ub3	1	1069.24	0.00746	1.98693	0.046007	4.75472	0.005249
UCHL5_HUMAN	99	107	NCTHQDVHL	8	1066.47	UCH37_DEUBAD UbPG plus K6/48 Ub3	10	1069.45	0.014474	2.19474	0.04765	4.75238	0.003156
UCHL5_HUMAN	99	107	NCTHQDVHL	8	1066.47	UCH37_DEUBAD UbPG plus K6/48 Ub3	30	1069.68	0.020624	2.4234	0.049863	4.75374	0.002839
UCHL5_HUMAN	99	107	NCTHQDVHL	8	1066.47	UCH37_DEUBAD UbPG plus K6/48 Ub3	60	1069.74	0.014716	2.48781	0.047724	4.75701	0.000534
UCHL5_HUMAN	99	107	NCTHQDVHL	8	1066.47	UCH37_DEUBAD UbPG plus K6/48 Ub3	120	1069.97	0.017587	2.71629	0.048686	4.75827	0.001246
UCHL5_HUMAN	99	107	NCTHQDVHL	8	1066.47	UCH37_DEUBAD UbPG plus Ub	0	1067.26	0.045398	0	0	4.85491	0.032793
UCHL5_HUMAN	99	107	NCTHQDVHL	8	1066.47	UCH37_DEUBAD UbPG plus Ub	1	1069.39	0.042475	2.13787	0.06217	4.81798	0.007849
UCHL5_HUMAN	99	107	NCTHQDVHL	8	1066.47	UCH37_DEUBAD UbPG plus Ub	10	1069.59	0.022632	2.3349	0.050727	4.81998	0.002113
UCHL5_HUMAN	99	107	NCTHQDVHL	8	1066.47	UCH37_DEUBAD UbPG plus Ub	30	1069.78	0.008275	2.52325	0.046146	4.81662	0.003317
UCHL5_HUMAN	99	107	NCTHQDVHL	8	1066.47	UCH37_DEUBAD UbPG plus Ub	60	1070	0.062729	2.74059	0.077433	4.81987	0.002556
UCHL5_HUMAN	99	107	NCTHQDVHL	8	1066.47	UCH37_DEUBAD UbPG plus Ub	120	1070.04	0.027256	2.78685	0.052952	4.81845	0.004563
UCHL5_HUMAN	99	107	NCTHQDVHL	8	1066.47	UCH37_DEUBAD_UbPG	0	1067.26	0.045398	0	0	4.85491	0.032793
UCHL5_HUMAN	99	107	NCTHQDVHL	8	1066.47	UCH37_DEUBAD_UbPG	1	1069.42	0.076757	2.16845	0.089178	4.84416	0.032071
UCHL5_HUMAN	99	107	NCTHQDVHL	8	1066.47	UCH37_DEUBAD_UbPG	10	1069.62	0.082013	2.36612	0.09374	4.84286	0.03001
UCHL5_HUMAN	99	107	NCTHQDVHL	8	1066.47	UCH37_DEUBAD_UbPG	30	1070.01	0.020245	2.75061	0.049708	4.86034	0.022051
UCHL5_HUMAN	99	107	NCTHQDVHL	8	1066.47	UCH37_DEUBAD_UbPG	60	1069.99	0.063124	2.73103	0.077754	4.84354	0.032347
UCHL5_HUMAN	99	107	NCTHQDVHL	8	1066.47	UCH37_DEUBAD_UbPG	120	1070.06	0.103147	2.80688	0.112696	4.82834	0.023131
UCHL5_HUMAN	99	107	NCTHQDVHL	8	1066.47	UCH37_DEUBAD_UbPG plus K48 Ub2	0	1067.26	0.045398	0	0	4.85491	0.032793
UCHL5_HUMAN	99	107	NCTHQDVHL	8	1066.47	UCH37_DEUBAD_UbPG plus K48 Ub2	1	1069.55	0.126547	2.29593	0.134444	4.86158	0.028063
UCHL5_HUMAN	99	107	NCTHQDVHL	8	1066.47	UCH37_DEUBAD_UbPG plus K48 Ub2	10	1069.78	0.138264	2.51959	0.145527	4.85311	0.030476
UCHL5_HUMAN	99	107	NCTHQDVHL	8	1066.47	UCH37_DEUBAD_UbPG plus K48 Ub2	30	1070.03	0.135076	2.77257	0.142501	4.86192	0.016772
UCHL5_HUMAN	99	107	NCTHQDVHL	8	1066.47	UCH37_DEUBAD_UbPG plus K48 Ub2	60	1069.98	0.125368	2.7272	0.133335	4.81964	0.021664
UCHL5_HUMAN	99	107	NCTHQDVHL	8	1066.47	UCH37_DEUBAD_UbPG plus K48 Ub2	120	1070.1	0.077558	2.8393	0.089868	4.82375	0.023408
UCHL5_HUMAN	99	111	NCTHQDVHLGETL	12	1466.67	UCH37_DEUBAD UbPG plus K6/48 Ub3	0	1467.43	0.021396	0	0	5.17612	0.02727
UCHL5_HUMAN	99	111	NCTHQDVHLGETL	12	1466.67	UCH37_DEUBAD UbPG plus K6/48 Ub3	1	1471.03	0.032054	3.5988	0.038539	5.08707	0.004589
UCHL5_HUMAN	99	111	NCTHQDVHLGETL	12	1466.67	UCH37_DEUBAD UbPG plus K6/48 Ub3	10	1471.39	0.036312	3.95538	0.042147	5.08354	0.002857
UCHL5_HUMAN	99	111	NCTHQDVHLGETL	12	1466.67	UCH37_DEUBAD UbPG plus K6/48 Ub3	30	1471.69	0.227396	4.26459	0.2284	5.0832	0.003949
UCHL5_HUMAN	99	111	NCTHQDVHLGETL	12	1466.67	UCH37_DEUBAD UbPG plus K6/48 Ub3	60	1472.05	0.015608	4.61476	0.026484	5.08801	0.002282
UCHL5_HUMAN	99	111	NCTHQDVHLGETL	12	1466.67	UCH37_DEUBAD UbPG plus K6/48 Ub3	120	1472.38	0.164262	4.95052	0.165649	5.08813	0.000627
UCHL5_HUMAN	99	111	NCTHQDVHLGETL	12	1466.67	UCH37_DEUBAD UbPG plus Ub	0	1467.43	0.021396	0	0	5.17612	0.02727
UCHL5_HUMAN	99	111	NCTHQDVHLGETL	12	1466.67	UCH37_DEUBAD UbPG plus Ub	1	1471.21	0.062917	3.77628	0.066455	5.1431	0.008336
UCHL5_HUMAN	99	111	NCTHQDVHLGETL	12	1466.67	UCH37_DEUBAD UbPG plus Ub	10	1471.59	0.149893	4.16171	0.151412	5.14761	0.00388
UCHL5_HUMAN	99	111	NCTHQDVHLGETL	12	1466.67	UCH37_DEUBAD UbPG plus Ub	30	1472.03	0.050806	4.6007	0.055128	5.14416	0.006047
UCHL5_HUMAN	99	111	NCTHQDVHLGETL	12	1466.67	UCH37_DEUBAD UbPG plus Ub	60	1472.55	0.065336	5.11653	0.06875	5.13893	0.00155
UCHL5_HUMAN	99	111	NCTHQDVHLGETL	12	1466.67	UCH37_DEUBAD UbPG plus Ub	120	1473.12	0	5.69163	0.021396	5.40647	0
UCHL5_HUMAN	99	111	NCTHQDVHLGETL	12	1466.67	UCH37_DEUBAD_UbPG	0	1467.43	0.021396	0	0	5.17612	0.02727
UCHL5_HUMAN	99	111	NCTHQDVHLGETL	12	1466.67	UCH37_DEUBAD_UbPG	1	1471.31	0.077421	3.87837	0.080324	5.15776	0.025288
UCHL5_HUMAN	99	111	NCTHQDVHLGETL	12	1466.67	UCH37_DEUBAD_UbPG	10	1471.77	0.241938	4.34169	0.242882	5.16	0.02482
UCHL5_HUMAN	99	111	NCTHQDVHLGETL	12	1466.67	UCH37_DEUBAD_UbPG	30	1472.42	0.093093	4.98895	0.09552	5.1758	0.022546
UCHL5_HUMAN	99	111	NCTHQDVHLGETL	12	1466.67	UCH37_DEUBAD_UbPG	60	1472.54	0	5.11356	0.021396	5.19519	0
UCHL5_HUMAN	99	111	NCTHQDVHLGETL	12	1466.67	UCH37_DEUBAD_UbPG	120	1472.88	0	5.44685	0.021396	5.70451	0
UCHL5_HUMAN	99	111	NCTHQDVHLGETL	12	1466.67	UCH37_DEUBAD_UbPG plus K48 Ub2	0	1467.43	0.021738	0	0	5.16871	0.028885
UCHL5_HUMAN	99	111	NCTHQDVHLGETL	12	1466.67	UCH37_DEUBAD_UbPG plus K48 Ub2	1	1471.38	0.19415	3.94955	0.195364	5.17287	0.026012
UCHL5_HUMAN	99	111	NCTHQDVHLGETL	12	1466.67	UCH37_DEUBAD_UbPG plus K48 Ub2	10	1471.73	0.193638	4.29537	0.194855	5.16285	0.027314
UCHL5_HUMAN	99	111	NCTHQDVHLGETL	12	1466.67	UCH37_DEUBAD_UbPG plus K48 Ub2	30	1472.09	0	4.65747	0.021738	5.18237	0
UCHL5_HUMAN	99	111	NCTHQDVHLGETL	12	1466.67	UCH37_DEUBAD_UbPG plus K48 Ub2	60	1472.03	0.133751	4.59924	0.135506	5.13548	0.000216
UCHL5_HUMAN	99	111	NCTHQDVHLGETL	12	1466.67	UCH37_DEUBAD_UbPG plus K48 Ub2	120	1472.58	0.017376	5.14598	0.027829	5.13596	0.001159
UCHL5_HUMAN	99	113	NCTHQDVHLGETLSE	14	1682.74	UCH37_DEUBAD UbPG plus K6/48 Ub3	0	1683.72	0.047136	0	0	4.94218	0.021062
UCHL5_HUMAN	99	113	NCTHQDVHLGETLSE	14	1682.74	UCH37_DEUBAD UbPG plus K6/48 Ub3	1	1687.54	0.018432	3.82469	0.050612	4.85794	0.00501
UCHL5_HUMAN	99	113	NCTHQDVHLGETLSE	14	1682.74	UCH37_DEUBAD UbPG plus K6/48 Ub3	10	1688.04	0.012577	4.32154	0.048785	4.85422	0.003014
UCHL5_HUMAN	99	113	NCTHQDVHLGETLSE	14	1682.74	UCH37_DEUBAD UbPG plus K6/48 Ub3	30	1688.61	0.065513	4.89062	0.080708	4.85595	0.003932
UCHL5_HUMAN	99	113	NCTHQDVHLGETLSE	14	1682.74	UCH37_DEUBAD UbPG plus K6/48 Ub3	60	1689.05	0.084529	5.32855	0.096783	4.85586	0.00158
UCHL5_HUMAN	99	113	NCTHQDVHLGETLSE	14	1682.74	UCH37_DEUBAD UbPG plus K6/48 Ub3	120	1689.41	0.015517	5.68795	0.049625	4.857	0.001689
UCHL5_HUMAN	99	113	NCTHQDVHLGETLSE	14	1682.74	UCH37_DEUBAD UbPG plus Ub	0	1683.72	0.047136	0	0	4.94218	0.021062
UCHL5_HUMAN	99	113	NCTHQDVHLGETLSE	14	1682.74	UCH37_DEUBAD UbPG plus Ub	1	1687.75	0.0296	4.03721	0.055659	4.91045	0.008361
UCHL5_HUMAN	99	113	NCTHQDVHLGETLSE	14	1682.74	UCH37_DEUBAD UbPG plus Ub	10	1688.3	0.051931	4.58263	0.070133	4.91026	0.00395
UCHL5_HUMAN	99	113	NCTHQDVHLGETLSE	14	1682.74	UCH37_DEUBAD UbPG plus Ub	30	1688.85	0.031291	5.12838	0.056577	4.90865	0.005487
UCHL5_HUMAN	99	113	NCTHQDVHLGETLSE	14	1682.74	UCH37_DEUBAD UbPG plus Ub	60	1689.5	0.07768	5.78105	0.090862	4.90466	0.004467
UCHL5_HUMAN	99	113	NCTHQDVHLGETLSE	14	1682.74	UCH37_DEUBAD UbPG plus Ub	120	1689.67	0.070999	5.9546	0.085221	4.90604	0.002911
UCHL5_HUMAN	99	113	NCTHQDVHLGETLSE	14	1682.74	UCH37_DEUBAD_UbPG	0	1683.72	0.047136	0	0	4.94218	0.021062
UCHL5_HUMAN	99	113	NCTHQDVHLGETLSE	14	1682.74	UCH37_DEUBAD_UbPG	1	1687.93	0.114454	4.20965	0.123781	4.92944	0.021059
UCHL5_HUMAN	99	113	NCTHQDVHLGETLSE	14	1682.74	UCH37_DEUBAD_UbPG	10	1688.67	0.12323	4.95572	0.131938	4.92852	0.019291
UCHL5_HUMAN	99	113	NCTHQDVHLGETLSE	14	1682.74	UCH37_DEUBAD_UbPG	30	1689.43	0.057099	5.70782	0.074041	4.93625	0.014438
UCHL5_HUMAN	99	113	NCTHQDVHLGETLSE	14	1682.74	UCH37_DEUBAD_UbPG	60	1689.57	0.088024	5.85509	0.09985	4.91827	0.019604
UCHL5_HUMAN	99	113	NCTHQDVHLGETLSE	14	1682.74	UCH37_DEUBAD_UbPG	120	1689.69	0.346412	5.97008	0.349604	4.91333	0.017278
UCHL5_HUMAN	99	113	NCTHQDVHLGETLSE	14	1682.74	UCH37_DEUBAD_UbPG plus K48 Ub2	0	1683.72	0.047136	0	0	4.94218	0.021062
UCHL5_HUMAN	99	113	NCTHQDVHLGETLSE	14	1682.74	UCH37_DEUBAD_UbPG plus K48 Ub2	1	1688.04	0.226752	4.32716	0.2316	4.93954	0.01717
UCHL5_HUMAN	99	113	NCTHQDVHLGETLSE	14	1682.74	UCH37_DEUBAD_UbPG plus K48 Ub2	10	1688.56	0.266837	4.84521	0.270968	4.93059	0.019811
UCHL5_HUMAN	99	113	NCTHQDVHLGETLSE	14	1682.74	UCH37_DEUBAD_UbPG plus K48 Ub2	30	1688.93	0.101237	5.21469	0.111673	4.93263	0.011
UCHL5_HUMAN	99	113	NCTHQDVHLGETLSE	14	1682.74	UCH37_DEUBAD_UbPG plus K48 Ub2	60	1689.06	0.003178	5.34344	0.047243	4.90056	0.001453
UCHL5_HUMAN	99	113	NCTHQDVHLGETLSE	14	1682.74	UCH37_DEUBAD_UbPG plus K48 Ub2	120	1689.48	0.046367	5.76253	0.066119	4.89958	0.000556
UCHL5_HUMAN	101	113	THQDVHLGETLSE	12	1465.69	UCH37_DEUBAD UbPG plus K6/48 Ub3	0	1466.38	0.043239	0	0	4.80514	0.022194
UCHL5_HUMAN	101	113	THQDVHLGETLSE	12	1465.69	UCH37_DEUBAD UbPG plus K6/48 Ub3	1	1469.53	0.232851	3.14746	0.236831	4.72438	0.003898
UCHL5_HUMAN	101	113	THQDVHLGETLSE	12	1465.69	UCH37_DEUBAD UbPG plus K6/48 Ub3	10	1470.1	0.07375	3.71867	0.085491	4.72175	0.003187
UCHL5_HUMAN	101	113	THQDVHLGETLSE	12	1465.69	UCH37_DEUBAD UbPG plus K6/48 Ub3	30	1470.6	0.064535	4.22447	0.077681	4.72061	0.003225
UCHL5_HUMAN	101	113	THQDVHLGETLSE	12	1465.69	UCH37_DEUBAD UbPG plus K6/48 Ub3	60	1471.11	0.046488	4.73611	0.063489	4.72078	0.000801
UCHL5_HUMAN	101	113	THQDVHLGETLSE	12	1465.69	UCH37_DEUBAD UbPG plus K6/48 Ub3	120	1471.49	0.076692	5.11244	0.088041	4.72988	0.002094
UCHL5_HUMAN	101	113	THQDVHLGETLSE	12	1465.69	UCH37_DEUBAD UbPG plus Ub	0	1466.38	0.043239	0	0	4.80514	0.022194
UCHL5_HUMAN	101	113	THQDVHLGETLSE	12	1465.69	UCH37_DEUBAD UbPG plus Ub	1	1469.67	0.036454	3.28816	0.056555	4.77046	0.007998
UCHL5_HUMAN	101	113	THQDVHLGETLSE	12	1465.69	UCH37_DEUBAD UbPG plus Ub	10	1470.25	0.046288	3.87208	0.063342	4.77176	0.001243
UCHL5_HUMAN	101	113	THQDVHLGETLSE	12	1465.69	UCH37_DEUBAD UbPG plus Ub	30	1470.81	0.044385	4.43107	0.061965	4.76924	0.003592
UCHL5_HUMAN	101	113	THQDVHLGETLSE	12	1465.69	UCH37_DEUBAD UbPG plus Ub	60	1471.7	0	5.31861	0.043239	4.75532	0
UCHL5_HUMAN	101	113	THQDVHLGETLSE	12	1465.69	UCH37_DEUBAD UbPG plus Ub	120	1471.5	0.183058	5.12323	0.188095	4.76891	0.004336
UCHL5_HUMAN	101	113	THQDVHLGETLSE	12	1465.69	UCH37_DEUBAD_UbPG	0	1466.38	0.043239	0	0	4.80514	0.022194
UCHL5_HUMAN	101	113	THQDVHLGETLSE	12	1465.69	UCH37_DEUBAD_UbPG	1	1469.71	0.095238	3.33434	0.104594	4.79174	0.024449
UCHL5_HUMAN	101	113	THQDVHLGETLSE	12	1465.69	UCH37_DEUBAD_UbPG	10	1470.51	0.147674	4.12779	0.153874	4.79005	0.020292
UCHL5_HUMAN	101	113	THQDVHLGETLSE	12	1465.69	UCH37_DEUBAD_UbPG	30	1471.29	0.121176	4.9144	0.128659	4.80294	0.014128
UCHL5_HUMAN	101	113	THQDVHLGETLSE	12	1465.69	UCH37_DEUBAD_UbPG	60	1471.86	0.486289	5.48088	0.488207	4.79259	0.019225
UCHL5_HUMAN	101	113	THQDVHLGETLSE	12	1465.69	UCH37_DEUBAD_UbPG	120	1471.84	0	5.46607	0.043239	4.76732	0
UCHL5_HUMAN	101	113	THQDVHLGETLSE	12	1465.69	UCH37_DEUBAD_UbPG plus K48 Ub2	0	1466.38	0.043239	0	0	4.80514	0.022194
UCHL5_HUMAN	101	113	THQDVHLGETLSE	12	1465.69	UCH37_DEUBAD_UbPG plus K48 Ub2	1	1469.82	0.224906	3.44402	0.229024	4.80207	0.018793
UCHL5_HUMAN	101	113	THQDVHLGETLSE	12	1465.69	UCH37_DEUBAD_UbPG plus K48 Ub2	10	1470.36	0.314108	3.98222	0.31707	4.79471	0.022001
UCHL5_HUMAN	101	113	THQDVHLGETLSE	12	1465.69	UCH37_DEUBAD_UbPG plus K48 Ub2	30	1470.93	0.304486	4.55264	0.307541	4.80058	0.010998
UCHL5_HUMAN	101	113	THQDVHLGETLSE	12	1465.69	UCH37_DEUBAD_UbPG plus K48 Ub2	60	1471.09	0.222867	4.71222	0.227023	4.76598	0.013403
UCHL5_HUMAN	101	113	THQDVHLGETLSE	12	1465.69	UCH37_DEUBAD_UbPG plus K48 Ub2	120	1471.39	0.19023	5.01501	0.195082	4.76722	0.004159
UCHL5_HUMAN	104	111	DVHLGETL	7	883.452	UCH37_DEUBAD UbPG plus K6/48 Ub3	0	883.805	0.066714	0	0	5.68973	0.018238
UCHL5_HUMAN	104	111	DVHLGETL	7	883.452	UCH37_DEUBAD UbPG plus K6/48 Ub3	1	886.545	0.12819	2.73949	0.144511	5.61936	0.005943
UCHL5_HUMAN	104	111	DVHLGETL	7	883.452	UCH37_DEUBAD UbPG plus K6/48 Ub3	10	886.88	0.032912	3.07439	0.074391	5.61798	0.002923
UCHL5_HUMAN	104	111	DVHLGETL	7	883.452	UCH37_DEUBAD UbPG plus K6/48 Ub3	30	887.123	0.153513	3.31796	0.167383	5.61924	0.002277
UCHL5_HUMAN	104	111	DVHLGETL	7	883.452	UCH37_DEUBAD UbPG plus K6/48 Ub3	60	887.427	0.011661	3.62179	0.067725	5.6234	0.002587
UCHL5_HUMAN	104	111	DVHLGETL	7	883.452	UCH37_DEUBAD UbPG plus K6/48 Ub3	120	887.516	0.019705	3.71123	0.069563	5.62299	0.00118
UCHL5_HUMAN	104	111	DVHLGETL	7	883.452	UCH37_DEUBAD UbPG plus Ub	0	883.861	0.012026	0	0	5.68865	0.018026
UCHL5_HUMAN	104	111	DVHLGETL	7	883.452	UCH37_DEUBAD UbPG plus Ub	1	886.575	0.022355	2.71406	0.025384	5.67773	0.009246
UCHL5_HUMAN	104	111	DVHLGETL	7	883.452	UCH37_DEUBAD UbPG plus Ub	10	886.872	0.082716	3.01114	0.083586	5.67495	0.000895
UCHL5_HUMAN	104	111	DVHLGETL	7	883.452	UCH37_DEUBAD UbPG plus Ub	30	887.304	0.028882	3.44286	0.031286	5.67564	0.002585
UCHL5_HUMAN	104	111	DVHLGETL	7	883.452	UCH37_DEUBAD UbPG plus Ub	60	887.464	0.001923	3.60297	0.012179	5.67733	0.002664
UCHL5_HUMAN	104	111	DVHLGETL	7	883.452	UCH37_DEUBAD UbPG plus Ub	120	887.532	0.105133	3.67105	0.105819	5.67244	0.002286
UCHL5_HUMAN	104	111	DVHLGETL	7	883.452	UCH37_DEUBAD_UbPG	0	883.847	0	0	0	5.66605	0
UCHL5_HUMAN	104	111	DVHLGETL	7	883.452	UCH37_DEUBAD_UbPG	1	886.613	0	2.76663	0	5.6709	0
UCHL5_HUMAN	104	111	DVHLGETL	7	883.452	UCH37_DEUBAD_UbPG	10	887.035	0	3.18806	0	5.67107	0
UCHL5_HUMAN	104	111	DVHLGETL	7	883.452	UCH37_DEUBAD_UbPG	30	887.46	0	3.61377	0	5.6661	0
UCHL5_HUMAN	104	111	DVHLGETL	7	883.452	UCH37_DEUBAD_UbPG	60	887.586	0	3.739	0	5.66663	0
UCHL5_HUMAN	104	111	DVHLGETL	7	883.452	UCH37_DEUBAD_UbPG	120	887.506	0	3.65973	0	5.66549	0
UCHL5_HUMAN	104	111	DVHLGETL	7	883.452	UCH37_DEUBAD_UbPG plus K48 Ub2	0	883.847	0	0	0	5.66605	0
UCHL5_HUMAN	104	111	DVHLGETL	7	883.452	UCH37_DEUBAD_UbPG plus K48 Ub2	1	886.471	0	2.62447	0	5.67622	0
UCHL5_HUMAN	104	111	DVHLGETL	7	883.452	UCH37_DEUBAD_UbPG plus K48 Ub2	10	886.738	0	2.89119	0	5.65688	0
UCHL5_HUMAN	104	111	DVHLGETL	7	883.452	UCH37_DEUBAD_UbPG plus K48 Ub2	30	887.269	0	3.42268	0	5.6658	0
UCHL5_HUMAN	104	111	DVHLGETL	7	883.452	UCH37_DEUBAD_UbPG plus K48 Ub2	60	887.394	0	3.54702	0	5.6613	0
UCHL5_HUMAN	104	111	DVHLGETL	7	883.452	UCH37_DEUBAD_UbPG plus K48 Ub2	120	887.457	0	3.6107	0	5.66213	0
UCHL5_HUMAN	104	113	DVHLGETLSE	9	1099.53	UCH37_DEUBAD UbPG plus K6/48 Ub3	0	1100.16	0.069466	0	0	5.342	0.007665
UCHL5_HUMAN	104	113	DVHLGETLSE	9	1099.53	UCH37_DEUBAD UbPG plus K6/48 Ub3	1	1103.02	0.062633	2.85972	0.093533	5.29049	0.004924
UCHL5_HUMAN	104	113	DVHLGETLSE	9	1099.53	UCH37_DEUBAD UbPG plus K6/48 Ub3	10	1103.59	0.038297	3.43633	0.079323	5.28553	0.003001
UCHL5_HUMAN	104	113	DVHLGETLSE	9	1099.53	UCH37_DEUBAD UbPG plus K6/48 Ub3	30	1104.01	0.063688	3.84964	0.094243	5.28771	0.002215
UCHL5_HUMAN	104	113	DVHLGETLSE	9	1099.53	UCH37_DEUBAD UbPG plus K6/48 Ub3	60	1104.5	0.081467	4.3467	0.107062	5.28909	0.001944
UCHL5_HUMAN	104	113	DVHLGETLSE	9	1099.53	UCH37_DEUBAD UbPG plus K6/48 Ub3	120	1104.64	0.042333	4.48501	0.081348	5.28883	0.002338
UCHL5_HUMAN	104	113	DVHLGETLSE	9	1099.53	UCH37_DEUBAD UbPG plus Ub	0	1100.16	0.069466	0	0	5.342	0.007665
UCHL5_HUMAN	104	113	DVHLGETLSE	9	1099.53	UCH37_DEUBAD UbPG plus Ub	1	1103.18	0.073595	3.02367	0.101201	5.33141	0.006076
UCHL5_HUMAN	104	113	DVHLGETLSE	9	1099.53	UCH37_DEUBAD UbPG plus Ub	10	1103.67	0.037479	3.50899	0.078932	5.33256	0.001865
UCHL5_HUMAN	104	113	DVHLGETLSE	9	1099.53	UCH37_DEUBAD UbPG plus Ub	30	1104.33	0.06702	4.17241	0.096526	5.32684	0.000254
UCHL5_HUMAN	104	113	DVHLGETLSE	9	1099.53	UCH37_DEUBAD UbPG plus Ub	60	1104.69	0.063825	4.53011	0.094335	5.32698	0.000324
UCHL5_HUMAN	104	113	DVHLGETLSE	9	1099.53	UCH37_DEUBAD UbPG plus Ub	120	1104.65	0.047866	4.49594	0.084361	5.32774	0.001589
UCHL5_HUMAN	104	113	DVHLGETLSE	9	1099.53	UCH37_DEUBAD_UbPG	0	1100.16	0.069466	0	0	5.342	0.007665
UCHL5_HUMAN	104	113	DVHLGETLSE	9	1099.53	UCH37_DEUBAD_UbPG	1	1103.26	0.077739	3.1042	0.104254	5.33658	0.007872
UCHL5_HUMAN	104	113	DVHLGETLSE	9	1099.53	UCH37_DEUBAD_UbPG	10	1104.06	0.210343	3.89926	0.221517	5.33295	0.00686
UCHL5_HUMAN	104	113	DVHLGETLSE	9	1099.53	UCH37_DEUBAD_UbPG	30	1104.71	0.158285	4.55501	0.172857	5.33149	0.007039
UCHL5_HUMAN	104	113	DVHLGETLSE	9	1099.53	UCH37_DEUBAD_UbPG	60	1104.7	0.165274	4.54317	0.179279	5.33288	0.009665
UCHL5_HUMAN	104	113	DVHLGETLSE	9	1099.53	UCH37_DEUBAD_UbPG	120	1104.92	0.167532	4.76669	0.181363	5.33316	0.008805
UCHL5_HUMAN	104	113	DVHLGETLSE	9	1099.53	UCH37_DEUBAD_UbPG plus K48 Ub2	0	1100.16	0.069466	0	0	5.342	0.007665
UCHL5_HUMAN	104	113	DVHLGETLSE	9	1099.53	UCH37_DEUBAD_UbPG plus K48 Ub2	1	1103.31	0.119812	3.15454	0.138494	5.3424	0.008182
UCHL5_HUMAN	104	113	DVHLGETLSE	9	1099.53	UCH37_DEUBAD_UbPG plus K48 Ub2	10	1104.06	0.113493	3.89896	0.133064	5.33862	0.000633
UCHL5_HUMAN	104	113	DVHLGETLSE	9	1099.53	UCH37_DEUBAD_UbPG plus K48 Ub2	30	1104.26	0.125594	4.10156	0.143525	5.33316	0.003144
UCHL5_HUMAN	104	113	DVHLGETLSE	9	1099.53	UCH37_DEUBAD_UbPG plus K48 Ub2	60	1104.52	0.105406	4.36405	0.126237	5.32948	0.005585
UCHL5_HUMAN	104	113	DVHLGETLSE	9	1099.53	UCH37_DEUBAD_UbPG plus K48 Ub2	120	1104.84	0.173632	4.68226	0.187012	5.33071	0.005902
UCHL5_HUMAN	114	120	FKEFSQS	6	872.415	UCH37_DEUBAD UbPG plus K6/48 Ub3	0	873.12	0.010452	0	0	4.6615	0.021402
UCHL5_HUMAN	114	120	FKEFSQS	6	872.415	UCH37_DEUBAD UbPG plus K6/48 Ub3	1	874.096	0.031472	0.976134	0.033162	4.59215	0.005316
UCHL5_HUMAN	114	120	FKEFSQS	6	872.415	UCH37_DEUBAD UbPG plus K6/48 Ub3	10	874.189	0.028309	1.06926	0.030177	4.58912	0.003047
UCHL5_HUMAN	114	120	FKEFSQS	6	872.415	UCH37_DEUBAD UbPG plus K6/48 Ub3	30	874.508	0.036699	1.38838	0.038158	4.59009	0.003034
UCHL5_HUMAN	114	120	FKEFSQS	6	872.415	UCH37_DEUBAD UbPG plus K6/48 Ub3	60	874.74	0.028632	1.62071	0.03048	4.59169	0.002879
UCHL5_HUMAN	114	120	FKEFSQS	6	872.415	UCH37_DEUBAD UbPG plus K6/48 Ub3	120	874.987	0.051621	1.86698	0.052668	4.59275	0.000809
UCHL5_HUMAN	114	120	FKEFSQS	6	872.415	UCH37_DEUBAD UbPG plus Ub	0	873.014	0.127169	0	0	4.65894	0.021029
UCHL5_HUMAN	114	120	FKEFSQS	6	872.415	UCH37_DEUBAD UbPG plus Ub	1	874.708	0.186548	1.69404	0.22577	4.64091	0.008393
UCHL5_HUMAN	114	120	FKEFSQS	6	872.415	UCH37_DEUBAD UbPG plus Ub	10	875.323	0.030897	2.3093	0.130869	4.64048	0.002192
UCHL5_HUMAN	114	120	FKEFSQS	6	872.415	UCH37_DEUBAD UbPG plus Ub	30	875.774	0.054717	2.76027	0.138441	4.63736	0.004044
UCHL5_HUMAN	114	120	FKEFSQS	6	872.415	UCH37_DEUBAD UbPG plus Ub	60	876.034	0.070268	3.02051	0.145292	4.63636	0.002262
UCHL5_HUMAN	114	120	FKEFSQS	6	872.415	UCH37_DEUBAD UbPG plus Ub	120	876.206	0.004047	3.19207	0.127234	4.63252	0.002844
UCHL5_HUMAN	114	120	FKEFSQS	6	872.415	UCH37_DEUBAD_UbPG	0	873.014	0.127169	0	0	4.65894	0.021029
UCHL5_HUMAN	114	120	FKEFSQS	6	872.415	UCH37_DEUBAD_UbPG	1	874.864	0.096029	1.85053	0.159354	4.65458	0.020086
UCHL5_HUMAN	114	120	FKEFSQS	6	872.415	UCH37_DEUBAD_UbPG	10	875.44	0.458787	2.42598	0.476085	4.65467	0.016737
UCHL5_HUMAN	114	120	FKEFSQS	6	872.415	UCH37_DEUBAD_UbPG	30	875.874	0.45273	2.86033	0.470251	4.65115	0.017908
UCHL5_HUMAN	114	120	FKEFSQS	6	872.415	UCH37_DEUBAD_UbPG	60	876.051	0.126677	3.0376	0.179497	4.64957	0.019617
UCHL5_HUMAN	114	120	FKEFSQS	6	872.415	UCH37_DEUBAD_UbPG	120	876.236	0.184068	3.22214	0.223725	4.65065	0.020764
UCHL5_HUMAN	114	120	FKEFSQS	6	872.415	UCH37_DEUBAD_UbPG plus K48 Ub2	0	873.12	0.010452	0	0	4.6615	0.021402
UCHL5_HUMAN	114	120	FKEFSQS	6	872.415	UCH37_DEUBAD_UbPG plus K48 Ub2	1	874.144	0.058539	1.02399	0.059464	4.66746	0.017293
UCHL5_HUMAN	114	120	FKEFSQS	6	872.415	UCH37_DEUBAD_UbPG plus K48 Ub2	10	874.294	0.089053	1.17383	0.089664	4.65768	0.020508
UCHL5_HUMAN	114	120	FKEFSQS	6	872.415	UCH37_DEUBAD_UbPG plus K48 Ub2	30	874.499	0.107655	1.37886	0.108161	4.6563	0.015613
UCHL5_HUMAN	114	120	FKEFSQS	6	872.415	UCH37_DEUBAD_UbPG plus K48 Ub2	60	874.723	0.141781	1.6036	0.142166	4.65399	0.016849
UCHL5_HUMAN	114	120	FKEFSQS	6	872.415	UCH37_DEUBAD_UbPG plus K48 Ub2	120	874.93	0.137035	1.81027	0.137433	4.65404	0.017652
UCHL5_HUMAN	114	121	FKEFSQSF	7	1019.48	UCH37_DEUBAD UbPG plus K6/48 Ub3	0	1020.33	0.223531	0	0	6.29639	0.032954
UCHL5_HUMAN	114	121	FKEFSQSF	7	1019.48	UCH37_DEUBAD UbPG plus K6/48 Ub3	1	1021.49	0.202705	1.16298	0.301755	6.20804	0.00853
UCHL5_HUMAN	114	121	FKEFSQSF	7	1019.48	UCH37_DEUBAD UbPG plus K6/48 Ub3	10	1021.58	0.160406	1.25348	0.27513	6.20029	0.003188
UCHL5_HUMAN	114	121	FKEFSQSF	7	1019.48	UCH37_DEUBAD UbPG plus K6/48 Ub3	30	1021.91	0.160201	1.58567	0.27501	6.20167	0.002633
UCHL5_HUMAN	114	121	FKEFSQSF	7	1019.48	UCH37_DEUBAD UbPG plus K6/48 Ub3	60	1022.19	0.132778	1.86597	0.259993	6.20189	0.002942
UCHL5_HUMAN	114	121	FKEFSQSF	7	1019.48	UCH37_DEUBAD UbPG plus K6/48 Ub3	120	1022.5	0.106521	2.17467	0.247615	6.20556	0.00206
UCHL5_HUMAN	114	121	FKEFSQSF	7	1019.48	UCH37_DEUBAD UbPG plus Ub	0	1020.33	0.223531	0	0	6.29639	0.032954
UCHL5_HUMAN	114	121	FKEFSQSF	7	1019.48	UCH37_DEUBAD UbPG plus Ub	1	1022.14	0.110542	1.81754	0.249371	6.27151	0.010674
UCHL5_HUMAN	114	121	FKEFSQSF	7	1019.48	UCH37_DEUBAD UbPG plus Ub	10	1022.98	0.082933	2.64828	0.23842	6.26908	0.004296
UCHL5_HUMAN	114	121	FKEFSQSF	7	1019.48	UCH37_DEUBAD UbPG plus Ub	30	1023.5	0.018442	3.16976	0.224291	6.2649	0.002877
UCHL5_HUMAN	114	121	FKEFSQSF	7	1019.48	UCH37_DEUBAD UbPG plus Ub	60	1023.97	0.016003	3.64728	0.224103	6.26681	0.002938
UCHL5_HUMAN	114	121	FKEFSQSF	7	1019.48	UCH37_DEUBAD UbPG plus Ub	120	1024.14	0.030529	3.81742	0.225607	6.26334	0.003568
UCHL5_HUMAN	114	121	FKEFSQSF	7	1019.48	UCH37_DEUBAD_UbPG	0	1020.36	0.255153	0	0	6.29865	0.03188
UCHL5_HUMAN	114	121	FKEFSQSF	7	1019.48	UCH37_DEUBAD_UbPG	1	1022.29	0.084842	1.92829	0.268889	6.28907	0.030637
UCHL5_HUMAN	114	121	FKEFSQSF	7	1019.48	UCH37_DEUBAD_UbPG	10	1023.22	0.074862	2.86155	0.265908	6.28867	0.028297
UCHL5_HUMAN	114	121	FKEFSQSF	7	1019.48	UCH37_DEUBAD_UbPG	30	1023.96	0.085338	3.59584	0.269046	6.28467	0.027175
UCHL5_HUMAN	114	121	FKEFSQSF	7	1019.48	UCH37_DEUBAD_UbPG	60	1024.09	0.028471	3.73197	0.256736	6.28547	0.030751
UCHL5_HUMAN	114	121	FKEFSQSF	7	1019.48	UCH37_DEUBAD_UbPG	120	1024.32	0.014423	3.95338	0.25556	6.28553	0.03228
UCHL5_HUMAN	114	121	FKEFSQSF	7	1019.48	UCH37_DEUBAD_UbPG plus K48 Ub2	0	1020.33	0.223531	0	0	6.29639	0.032954
UCHL5_HUMAN	114	121	FKEFSQSF	7	1019.48	UCH37_DEUBAD_UbPG plus K48 Ub2	1	1021.53	0.232079	1.20304	0.322222	6.30969	0.023194
UCHL5_HUMAN	114	121	FKEFSQSF	7	1019.48	UCH37_DEUBAD_UbPG plus K48 Ub2	10	1021.66	0.239613	1.33211	0.32769	6.29903	0.028069
UCHL5_HUMAN	114	121	FKEFSQSF	7	1019.48	UCH37_DEUBAD_UbPG plus K48 Ub2	30	1021.89	0.237706	1.55842	0.326298	6.29823	0.020255
UCHL5_HUMAN	114	121	FKEFSQSF	7	1019.48	UCH37_DEUBAD_UbPG plus K48 Ub2	60	1022.17	0.255509	1.83859	0.339487	6.29462	0.022534
UCHL5_HUMAN	114	121	FKEFSQSF	7	1019.48	UCH37_DEUBAD_UbPG plus K48 Ub2	120	1022.39	0.218817	2.05883	0.312805	6.29575	0.0245
UCHL5_HUMAN	114	122	FKEFSQSFD	8	1134.51	UCH37_DEUBAD UbPG plus K6/48 Ub3	0	1135.26	0.083438	0	0	6.03392	0.027075
UCHL5_HUMAN	114	122	FKEFSQSFD	8	1134.51	UCH37_DEUBAD UbPG plus K6/48 Ub3	1	1136.59	0.067645	1.33909	0.107414	5.96586	0.006719
UCHL5_HUMAN	114	122	FKEFSQSFD	8	1134.51	UCH37_DEUBAD UbPG plus K6/48 Ub3	10	1137.01	0.022148	1.74971	0.086327	5.95836	0.002045
UCHL5_HUMAN	114	122	FKEFSQSFD	8	1134.51	UCH37_DEUBAD UbPG plus K6/48 Ub3	30	1137.37	0.05113	2.11167	0.097858	5.95928	0.002785
UCHL5_HUMAN	114	122	FKEFSQSFD	8	1134.51	UCH37_DEUBAD UbPG plus K6/48 Ub3	60	1137.68	0.046394	2.42072	0.095469	5.9587	0.002674
UCHL5_HUMAN	114	122	FKEFSQSFD	8	1134.51	UCH37_DEUBAD UbPG plus K6/48 Ub3	120	1137.98	0.050792	2.72684	0.097682	5.9618	0.001824
UCHL5_HUMAN	114	122	FKEFSQSFD	8	1134.51	UCH37_DEUBAD UbPG plus Ub	0	1135.26	0.083438	0	0	6.03392	0.027075
UCHL5_HUMAN	114	122	FKEFSQSFD	8	1134.51	UCH37_DEUBAD UbPG plus Ub	1	1137.7	0.026819	2.44298	0.087642	6.0118	0.011359
UCHL5_HUMAN	114	122	FKEFSQSFD	8	1134.51	UCH37_DEUBAD UbPG plus Ub	10	1138.54	0.020169	3.28282	0.085841	6.0096	0.002888
UCHL5_HUMAN	114	122	FKEFSQSFD	8	1134.51	UCH37_DEUBAD UbPG plus Ub	30	1139.1	0.019246	3.84615	0.085629	6.00697	0.003529
UCHL5_HUMAN	114	122	FKEFSQSFD	8	1134.51	UCH37_DEUBAD UbPG plus Ub	60	1139.57	0.006971	4.31319	0.083728	6.00769	0.002391
UCHL5_HUMAN	114	122	FKEFSQSFD	8	1134.51	UCH37_DEUBAD UbPG plus Ub	120	1139.77	0.027238	4.51202	0.087771	6.00585	0.003442
UCHL5_HUMAN	114	122	FKEFSQSFD	8	1134.51	UCH37_DEUBAD_UbPG	0	1135.26	0.083438	0	0	6.03392	0.027075
UCHL5_HUMAN	114	122	FKEFSQSFD	8	1134.51	UCH37_DEUBAD_UbPG	1	1137.87	0.042115	2.61034	0.093464	6.02457	0.024994
UCHL5_HUMAN	114	122	FKEFSQSFD	8	1134.51	UCH37_DEUBAD_UbPG	10	1138.79	0.039491	3.5327	0.092311	6.02264	0.02167
UCHL5_HUMAN	114	122	FKEFSQSFD	8	1134.51	UCH37_DEUBAD_UbPG	30	1139.54	0.012871	4.28025	0.084425	6.01872	0.022583
UCHL5_HUMAN	114	122	FKEFSQSFD	8	1134.51	UCH37_DEUBAD_UbPG	60	1139.74	0.025199	4.48319	0.08716	6.02097	0.025407
UCHL5_HUMAN	114	122	FKEFSQSFD	8	1134.51	UCH37_DEUBAD_UbPG	120	1139.99	0.015846	4.73079	0.084929	6.02007	0.02488
UCHL5_HUMAN	114	122	FKEFSQSFD	8	1134.51	UCH37_DEUBAD_UbPG plus K48 Ub2	0	1135.26	0.083438	0	0	6.03392	0.027075
UCHL5_HUMAN	114	122	FKEFSQSFD	8	1134.51	UCH37_DEUBAD_UbPG plus K48 Ub2	1	1136.84	0.198676	1.57952	0.215486	6.04311	0.019925
UCHL5_HUMAN	114	122	FKEFSQSFD	8	1134.51	UCH37_DEUBAD_UbPG plus K48 Ub2	10	1137.06	0.103383	1.80533	0.132853	6.02973	0.02345
UCHL5_HUMAN	114	122	FKEFSQSFD	8	1134.51	UCH37_DEUBAD_UbPG plus K48 Ub2	30	1137.33	0.128233	2.07219	0.152989	6.02824	0.014395
UCHL5_HUMAN	114	122	FKEFSQSFD	8	1134.51	UCH37_DEUBAD_UbPG plus K48 Ub2	60	1137.58	0.205293	2.32295	0.221601	6.02493	0.016425
UCHL5_HUMAN	114	122	FKEFSQSFD	8	1134.51	UCH37_DEUBAD_UbPG plus K48 Ub2	120	1137.85	0.223709	2.59889	0.238763	6.02588	0.018876
UCHL5_HUMAN	114	123	FKEFSQSFDA	9	1205.55	UCH37_DEUBAD UbPG plus K6/48 Ub3	0	1206.19	0.023724	0	0	6.12184	0.023281
UCHL5_HUMAN	114	123	FKEFSQSFDA	9	1205.55	UCH37_DEUBAD UbPG plus K6/48 Ub3	1	1208.23	0.03905	2.035	0.045691	6.05828	0.005951
UCHL5_HUMAN	114	123	FKEFSQSFDA	9	1205.55	UCH37_DEUBAD UbPG plus K6/48 Ub3	10	1208.61	0.00689	2.4203	0.024704	6.0509	0.00317
UCHL5_HUMAN	114	123	FKEFSQSFDA	9	1205.55	UCH37_DEUBAD UbPG plus K6/48 Ub3	30	1208.92	0.00865	2.72354	0.025251	6.05354	0.002532
UCHL5_HUMAN	114	123	FKEFSQSFDA	9	1205.55	UCH37_DEUBAD UbPG plus K6/48 Ub3	60	1209.19	0.045621	2.99881	0.05142	6.05212	0.001827
UCHL5_HUMAN	114	123	FKEFSQSFDA	9	1205.55	UCH37_DEUBAD UbPG plus K6/48 Ub3	120	1209.61	0.057806	3.41419	0.062485	6.05411	0.00091
UCHL5_HUMAN	114	123	FKEFSQSFDA	9	1205.55	UCH37_DEUBAD UbPG plus Ub	0	1206.19	0.023724	0	0	6.12184	0.023281
UCHL5_HUMAN	114	123	FKEFSQSFDA	9	1205.55	UCH37_DEUBAD UbPG plus Ub	1	1209.25	0.08558	3.05778	0.088808	6.1024	0.009822
UCHL5_HUMAN	114	123	FKEFSQSFDA	9	1205.55	UCH37_DEUBAD UbPG plus Ub	10	1210.11	0.039773	3.91508	0.046311	6.10346	0.000532
UCHL5_HUMAN	114	123	FKEFSQSFDA	9	1205.55	UCH37_DEUBAD UbPG plus Ub	30	1210.61	0.024755	4.41591	0.034287	6.10026	0.00481
UCHL5_HUMAN	114	123	FKEFSQSFDA	9	1205.55	UCH37_DEUBAD UbPG plus Ub	60	1210.96	0.025128	4.76812	0.034558	6.10043	0.001056
UCHL5_HUMAN	114	123	FKEFSQSFDA	9	1205.55	UCH37_DEUBAD UbPG plus Ub	120	1211.15	0.04657	4.96115	0.052264	6.09903	0.001509
UCHL5_HUMAN	114	123	FKEFSQSFDA	9	1205.55	UCH37_DEUBAD_UbPG	0	1206.19	0.023724	0	0	6.12184	0.023281
UCHL5_HUMAN	114	123	FKEFSQSFDA	9	1205.55	UCH37_DEUBAD_UbPG	1	1209.39	0.055587	3.19687	0.060438	6.11451	0.021634
UCHL5_HUMAN	114	123	FKEFSQSFDA	9	1205.55	UCH37_DEUBAD_UbPG	10	1210.38	0.018752	4.18933	0.03024	6.11516	0.015672
UCHL5_HUMAN	114	123	FKEFSQSFDA	9	1205.55	UCH37_DEUBAD_UbPG	30	1210.95	0.031717	4.76047	0.039608	6.1095	0.019067
UCHL5_HUMAN	114	123	FKEFSQSFDA	9	1205.55	UCH37_DEUBAD_UbPG	60	1211.12	0.028556	4.9249	0.037125	6.11	0.021853
UCHL5_HUMAN	114	123	FKEFSQSFDA	9	1205.55	UCH37_DEUBAD_UbPG	120	1211.52	0.049037	5.32944	0.054474	6.10698	0.025545
UCHL5_HUMAN	114	123	FKEFSQSFDA	9	1205.55	UCH37_DEUBAD_UbPG plus K48 Ub2	0	1206.19	0.023724	0	0	6.12184	0.023281
UCHL5_HUMAN	114	123	FKEFSQSFDA	9	1205.55	UCH37_DEUBAD_UbPG plus K48 Ub2	1	1208.27	0.072684	2.07696	0.076457	6.12924	0.016732
UCHL5_HUMAN	114	123	FKEFSQSFDA	9	1205.55	UCH37_DEUBAD_UbPG plus K48 Ub2	10	1208.69	0.154789	2.4971	0.156597	6.11995	0.019694
UCHL5_HUMAN	114	123	FKEFSQSFDA	9	1205.55	UCH37_DEUBAD_UbPG plus K48 Ub2	30	1208.93	0.115447	2.73852	0.117859	6.1205	0.011823
UCHL5_HUMAN	114	123	FKEFSQSFDA	9	1205.55	UCH37_DEUBAD_UbPG plus K48 Ub2	60	1209.16	0.190966	2.9693	0.192434	6.11733	0.01533
UCHL5_HUMAN	114	123	FKEFSQSFDA	9	1205.55	UCH37_DEUBAD_UbPG plus K48 Ub2	120	1209.43	0.09255	3.23643	0.095542	6.11886	0.017955
UCHL5_HUMAN	114	127	FKEFSQSFDAAMKG	13	1592.74	UCH37_DEUBAD UbPG plus K6/48 Ub3	0	1593.61	0.050468	0	0	6.16022	0.022335
UCHL5_HUMAN	114	127	FKEFSQSFDAAMKG	13	1592.74	UCH37_DEUBAD UbPG plus K6/48 Ub3	1	1596.59	0.080292	2.97558	0.094836	6.06311	0.006563
UCHL5_HUMAN	114	127	FKEFSQSFDAAMKG	13	1592.74	UCH37_DEUBAD UbPG plus K6/48 Ub3	10	1596.99	0.100025	3.37644	0.112036	6.05708	0.003312
UCHL5_HUMAN	114	127	FKEFSQSFDAAMKG	13	1592.74	UCH37_DEUBAD UbPG plus K6/48 Ub3	30	1597.49	0.179204	3.88177	0.186174	6.05535	0.003081
UCHL5_HUMAN	114	127	FKEFSQSFDAAMKG	13	1592.74	UCH37_DEUBAD UbPG plus K6/48 Ub3	60	1597.97	0.054385	4.35832	0.074194	6.05421	0.003017
UCHL5_HUMAN	114	127	FKEFSQSFDAAMKG	13	1592.74	UCH37_DEUBAD UbPG plus K6/48 Ub3	120	1598.35	0.066731	4.74198	0.083666	6.05407	0.001415
UCHL5_HUMAN	114	127	FKEFSQSFDAAMKG	13	1592.74	UCH37_DEUBAD UbPG plus Ub	0	1593.61	0.050468	0	0	6.16022	0.022335
UCHL5_HUMAN	114	127	FKEFSQSFDAAMKG	13	1592.74	UCH37_DEUBAD UbPG plus Ub	1	1598.04	0.130258	4.42781	0.139693	6.11063	0.006778
UCHL5_HUMAN	114	127	FKEFSQSFDAAMKG	13	1592.74	UCH37_DEUBAD UbPG plus Ub	10	1598.9	0.087044	5.28376	0.100616	6.11035	0.002011
UCHL5_HUMAN	114	127	FKEFSQSFDAAMKG	13	1592.74	UCH37_DEUBAD UbPG plus Ub	30	1599.63	0.133684	6.01565	0.142893	6.10575	0.004755
UCHL5_HUMAN	114	127	FKEFSQSFDAAMKG	13	1592.74	UCH37_DEUBAD UbPG plus Ub	60	1600.4	0.150852	6.78996	0.159071	6.10241	0.001105
UCHL5_HUMAN	114	127	FKEFSQSFDAAMKG	13	1592.74	UCH37_DEUBAD UbPG plus Ub	120	1600.81	0.209267	7.19917	0.215267	6.09868	0.002056
UCHL5_HUMAN	114	127	FKEFSQSFDAAMKG	13	1592.74	UCH37_DEUBAD_UbPG	0	1593.61	0.050468	0	0	6.16022	0.022335
UCHL5_HUMAN	114	127	FKEFSQSFDAAMKG	13	1592.74	UCH37_DEUBAD_UbPG	1	1598.15	0.163669	4.53483	0.171274	6.13626	0.025293
UCHL5_HUMAN	114	127	FKEFSQSFDAAMKG	13	1592.74	UCH37_DEUBAD_UbPG	10	1599.25	0.081418	5.63381	0.095791	6.13287	0.019627
UCHL5_HUMAN	114	127	FKEFSQSFDAAMKG	13	1592.74	UCH37_DEUBAD_UbPG	30	1600.37	0.054937	6.75739	0.0746	6.12545	0.024781
UCHL5_HUMAN	114	127	FKEFSQSFDAAMKG	13	1592.74	UCH37_DEUBAD_UbPG	60	1600.85	0.076932	7.23338	0.092009	6.12579	0.025993
UCHL5_HUMAN	114	127	FKEFSQSFDAAMKG	13	1592.74	UCH37_DEUBAD_UbPG	120	1601.47	0.148471	7.85767	0.156814	6.14548	0.002691
UCHL5_HUMAN	114	127	FKEFSQSFDAAMKG	13	1592.74	UCH37_DEUBAD_UbPG plus K48 Ub2	0	1593.61	0.050468	0	0	6.16022	0.022335
UCHL5_HUMAN	114	127	FKEFSQSFDAAMKG	13	1592.74	UCH37_DEUBAD_UbPG plus K48 Ub2	1	1597.26	0.427516	3.64305	0.430485	6.15226	0.017513
UCHL5_HUMAN	114	127	FKEFSQSFDAAMKG	13	1592.74	UCH37_DEUBAD_UbPG plus K48 Ub2	10	1597.49	0.282026	3.87848	0.286506	6.14241	0.021052
[truncated: 3,108 more rows]

## Sheet: ADRM1_DEUBAD
Protein	Start	End	Sequence	MaxUptake	MHP	State	Exposure Time (min)	Center	Center SD	Uptake	Uptake SD	RT	RT SD
[truncated: 2,265 more rows]

## Sheet: UCH37 F117A
Protein	Start	End	Sequence	MaxUptake	MHP	State	Exposure	Center	Center SD	Uptake	Uptake SD	RT	RT SD
[truncated: 2,807 more rows]
