# Supplementary material for: A cryptic K48 ubiquitin chain binding site on UCH37 is required for its role in proteasomal degradation
Source: eLife. 2022 Apr 22;11:e76100. doi: 10.7554/eLife.76100 (PMC9033301; doi:10.7554/eLife.76100)
Supplement: Figure 7—source data 1. [file elife-76100-fig7-data1.xlsx]

## Sheet: WT vs KO
Description	Gene Symbol	Abundance: F1: 126, Sample, 1, KO	Abundance: F1: 127N, Sample, 2, KO	Abundance: F1: 127C, Sample, 3, KO	Abundance: F1: 128N, Sample, 4, KO	Abundance: F1: 128C, Sample, 5, KO	Abundance: F1: 129N, Sample, 1, WT	Abundance: F1: 129C, Sample, 2, WT	Abundance: F1: 130N, Sample, 3, WT	Abundance: F1: 130C, Sample, 4, WT	Abundance: F1: 131, Sample, 5, WT
Ubiquitin carboxyl-terminal hydrolase isozyme L5 OS=Homo sapiens OX=9606 GN=UCHL5 PE=1 SV=3	UCHL5	17.6	16.1	21.9	36.6	36.2	825.3	863.8	817.7	902.4	836
Heme oxygenase 1 OS=Homo sapiens OX=9606 GN=HMOX1 PE=1 SV=1	HMOX1	107.5	121.8	152.5	131.7	146.8	472.8	548.4	547.5	568.8	622
Integrin alpha-V OS=Homo sapiens OX=9606 GN=ITGAV PE=1 SV=2	ITGAV	13.6	41.5	11.9	13.1	11	48.3	13.1	12.3	41.9	37.6
Creatine kinase U-type, mitochondrial OS=Homo sapiens OX=9606 GN=CKMT1A PE=1 SV=1	CKMT1A	1426.7	1745.8	1765.2	1813.4	1713.9	3808.6	4001.3	3955.8	4008.1	3695.3
Succinate dehydrogenase assembly factor 2, mitochondrial OS=Homo sapiens OX=9606 GN=SDHAF2 PE=1 SV=1	SDHAF2	86.3	116.9	152.9	111.2	97.4	213.6	175.7	219.1	257.3	293.9
Beta-2-glycoprotein 1 (Fragment) OS=Homo sapiens OX=9606 GN=APOH PE=1 SV=1	APOH	24.9	26.5	55.1	36.8	45.2	72.8	51.2	56.7	77.2	46.3
Phosphotriesterase-related protein OS=Homo sapiens OX=9606 GN=PTER PE=1 SV=1	PTER	102.7	54.3	79.5	121.4	89.9	80.7	135.9	143.4	223	203.9
RNA 3'-terminal phosphate cyclase-like protein (Fragment) OS=Homo sapiens OX=9606 GN=RCL1 PE=1 SV=8	RCL1	34.9	47.9	48.7	52.9	67	63.1	86.7	97.4	93	85.5
Mannose-6-phosphate isomerase OS=Homo sapiens OX=9606 GN=MPI PE=1 SV=2	MPI	444.1	588.4	534.5	615.3	456.5	1052	979.9	992	1001.9	955
Exosome complex component RRP43 OS=Homo sapiens OX=9606 GN=EXOSC8 PE=1 SV=1	EXOSC8	105.5	139.6	131	141.8	118.1	248.6	234.5	241.4	252.3	222.6
Glycine cleavage system H protein, mitochondrial (Fragment) OS=Homo sapiens OX=9606 GN=GCSH PE=1 SV=1	GCSH	508	672.6	738.4	542.5	507	1127.5	933.8	1017.8	1111	1004.2
Anamorsin OS=Homo sapiens OX=9606 GN=CIAPIN1 PE=1 SV=2	CIAPIN1	689.6	907.9	820.5	897.3	671.8	1536.8	1482.1	1380.1	1544.9	1383.7
Telomere-associated protein RIF1 OS=Homo sapiens OX=9606 GN=RIF1 PE=1 SV=2	RIF1	225.5	320.8	370	282.3	302.3	423.9	570.8	557.7	559.4	590.9
DNA-directed RNA polymerase II subunit GRINL1A, isoforms 4/5 OS=Homo sapiens OX=9606 GN=POLR2M PE=1 SV=1	POLR2M	11.1	12.5	15.3	13.9	10	23.9	19.1	18.6	23.5	22.9
Thymidylate kinase OS=Homo sapiens OX=9606 GN=DTYMK PE=1 SV=4	DTYMK	554.4	675.3	632.3	682.3	541.7	1161.7	1143.6	1143.8	1150.1	1112
S-formylglutathione hydrolase OS=Homo sapiens OX=9606 GN=ESD PE=1 SV=2	ESD	1418.3	1785	1631.5	1864	1535	2893	3127.6	2965.6	3089.3	2940.3
Codanin-1 OS=Homo sapiens OX=9606 GN=CDAN1 PE=1 SV=4	CDAN1	5.7	10.5	6.8	11.1	11.5	16.3	17.8	15.2	16	16.4
Hemoglobin subunit alpha OS=Homo sapiens OX=9606 GN=HBA1 PE=1 SV=2	HBA1	218	296.7	400.4	287.2	208.5	604.6	455.4	372.2	520.6	394.1
Profilin-2 OS=Homo sapiens OX=9606 GN=PFN2 PE=1 SV=3	PFN2	623.6	836.8	822.6	811.8	640.4	1282.6	1363.3	1204.7	1530.5	1276
Ubiquinone biosynthesis protein (Fragment) OS=Homo sapiens OX=9606 GN=COQ9 PE=1 SV=8	COQ9	12.9	23.1	20.6	18.3	22.9	35.6	30.4	35.9	35.5	35.3
Suppressor of fused homolog OS=Homo sapiens OX=9606 GN=SUFU PE=1 SV=2	SUFU	6	7.4	9.2	12.3	5.2	13.2	12.4	12.1	13.4	21
V-set and immunoglobulin domain-containing protein 10-like OS=Homo sapiens OX=9606 GN=VSIG10L PE=2 SV=2	VSIG10L	13.1	14.4	20.9	15.2	17.1	27.4	20.7	29.2	30.5	31.9
Albumin OS=Homo sapiens OX=9606 GN=ALB PE=1 SV=2	ALB	3067	1727.5	4274.9	2755.4	2524.1	6252.2	5433.5	4715	4793.2	3552.1
Insulin receptor substrate 4 OS=Homo sapiens OX=9606 GN=IRS4 PE=1 SV=1	IRS4	1730.3	2454.8	2167.9	2400.8	2156.8	3302.5	4082.8	3901.1	3922.8	3845.6
Exosome complex component CSL4 OS=Homo sapiens OX=9606 GN=EXOSC1 PE=1 SV=1	EXOSC1	189.7	235.6	230.2	216.2	186.6	389	345.7	347.8	349.7	359.2
Nicotinate-nucleotide pyrophosphorylase [carboxylating] OS=Homo sapiens OX=9606 GN=QPRT PE=1 SV=3	QPRT	401.3	448.9	487.2	420.6	409.3	792.2	731.2	835	880.7	846.4
Cyclin-dependent kinase 4 inhibitor C OS=Homo sapiens OX=9606 GN=CDKN2C PE=1 SV=1	CDKN2C	173.7	101.6	170	177.3	144.6	177	196.9	224.5	284.8	377.5
Lactotransferrin (Fragment) OS=Homo sapiens OX=9606 GN=LTF PE=1 SV=1	LTF	314.1	168.4	438.5	229	208.6	632.7	516.8	472.4	478.3	319.7
Butyryl-CoA dehydrogenase OS=Homo sapiens OX=9606 GN=IVD PE=1 SV=2	IVD	716	949.3	855.4	961.6	810.5	1655.2	1496.2	1552.5	1543.5	1492.7
Exosome complex component MTR3 OS=Homo sapiens OX=9606 GN=EXOSC6 PE=1 SV=1	EXOSC6	159.1	237.5	187	252.9	213.6	348.7	367.7	393.7	384.8	393.7
Coactosin-like protein OS=Homo sapiens OX=9606 GN=COTL1 PE=1 SV=3	COTL1	596.2	670.1	631.3	721.6	581.2	1087.3	1138.1	1047.6	1137.8	1051.6
Ubiquitin-fold modifier 1 OS=Homo sapiens OX=9606 GN=UFM1 PE=1 SV=1	UFM1	96.4	144.5	135.3	133.1	111.8	190.4	205.5	222.8	227.8	207.8
Apolipoprotein A-I OS=Homo sapiens OX=9606 GN=APOA1 PE=1 SV=1	APOA1	128.2	94.5	166	125.9	109.4	251.6	224.1	192.9	223.2	147.9
Exosome component 10 OS=Homo sapiens OX=9606 GN=EXOSC10 PE=1 SV=2	EXOSC10	35.4	48.1	41.1	42.3	52	57.2	77	82.4	76.1	79.4
Complement C3 OS=Homo sapiens OX=9606 GN=C3 PE=1 SV=2	C3	21.9	16.7	26.9	20.9	22.5	42.7	39.7	36	34.6	25.7
Adenine phosphoribosyltransferase OS=Homo sapiens OX=9606 GN=APRT PE=1 SV=2	APRT	1620.7	1824.2	1795.7	1959.8	1531.9	2778.8	2901.8	2840.9	3034.4	2906.8
Diphosphomevalonate decarboxylase OS=Homo sapiens OX=9606 GN=MVD PE=1 SV=1	MVD	152.6	193.4	144.3	203.8	138	296.6	278.3	274.3	217.1	248.2
Eukaryotic translation initiation factor 3 subunit I (Fragment) OS=Homo sapiens OX=9606 GN=EIF3I PE=1 SV=1	EIF3I	14.3	14.8	12.9	13.8	13.2	15.7	17.9	22.8	29.5	23.3
Serotransferrin (Fragment) OS=Homo sapiens OX=9606 GN=TF PE=1 SV=1	TF	280.1	170.4	369.6	286	250.5	568.9	487.9	423.2	436.8	334
Exosome complex component RRP40 OS=Homo sapiens OX=9606 GN=EXOSC3 PE=1 SV=3	EXOSC3	96.8	170.8	130.3	176	119.1	213.2	205.3	221.9	205.3	209
Cyclin-dependent kinase 6 OS=Homo sapiens OX=9606 GN=CDK6 PE=1 SV=1	CDK6	17.1	19.9	20.1	23.5	15.2	25.5	33.7	32.5	30.2	31.4
Endoplasmic reticulum resident protein 29 OS=Homo sapiens OX=9606 GN=ERP29 PE=1 SV=4	ERP29	990.3	1735.5	2722.1	911.8	876.8	1885.6	1317.3	1969.5	2561.5	3032.7
Alanyl-tRNA editing protein Aarsd1 OS=Homo sapiens OX=9606 GN=AARSD1 PE=1 SV=2	AARSD1	192.8	216.5	203	222.6	179.8	297	337.2	317.2	343.8	312.1
Dehydrogenase/reductase SDR family member 11 OS=Homo sapiens OX=9606 GN=DHRS11 PE=1 SV=1	DHRS11	12.7	13	9.9	12.1	9.1	20.5	20.1	14.1	18.8	16.9
Translationally-controlled tumor protein OS=Homo sapiens OX=9606 GN=TPT1 PE=1 SV=1	TPT1	2471.4	3661.5	3631.1	3004.4	2313.2	4646.8	3833.2	4346.4	4805.2	5035.1
Zinc finger MYM-type protein 2 OS=Homo sapiens OX=9606 GN=ZMYM2 PE=1 SV=1	ZMYM2	18	40.4	22.3	24.1	22.5	40	27.3	29.3	38.6	38.4
Glycogen phosphorylase, liver form OS=Homo sapiens OX=9606 GN=PYGL PE=1 SV=4	PYGL	3347.6	4295.6	3652.1	4450.5	3978.2	5772.8	7655.9	6828.3	6575.1	6118.3
Alpha-2-macroglobulin OS=Homo sapiens OX=9606 GN=A2M PE=1 SV=3	A2M	475	297.7	590.7	472.8	414.6	950.6	818.6	651.5	691.7	495.7
RNA polymerase II-associated protein 1 OS=Homo sapiens OX=9606 GN=RPAP1 PE=1 SV=3	RPAP1	11.6	20.7	15.1	18.4	15.8	26.8	29.2	23.6	29.8	24.4
DNA polymerase epsilon subunit 2 OS=Homo sapiens OX=9606 GN=POLE2 PE=1 SV=2	POLE2	60.2	80.9	73.1	89.5	77.2	110	130.5	121.8	116.5	112.2
Ubiquitin carboxyl-terminal hydrolase 10 OS=Homo sapiens OX=9606 GN=USP10 PE=1 SV=2	USP10	611.5	759	710.9	806.7	632.4	1112.6	1140.4	1102.2	1162.2	1091.2
AP complex subunit sigma OS=Homo sapiens OX=9606 GN=AP1S1 PE=1 SV=1	AP1S1	82.3	95.8	103.1	125.5	99.6	150.2	169.3	170	159	152.7
Protein ABHD14B OS=Homo sapiens OX=9606 GN=ABHD14B PE=1 SV=1	ABHD14B	730.4	811.2	815	806.5	684.8	1273.8	1204.3	1252.5	1262.3	1271.2
CXXC motif containing zinc binding protein OS=Homo sapiens OX=9606 GN=CZIB PE=1 SV=1	CZIB	264.8	372.8	429.7	289	238.9	479.7	423.7	488.3	573.8	620.8
Lysine--tRNA ligase OS=Homo sapiens OX=9606 GN=KARS1 PE=1 SV=3	KARS1	1217.5	1793.2	1426.4	1718.6	1522.5	2331.7	2602.8	2645.4	2467.1	2415.3
Tetratricopeptide repeat protein 12 OS=Homo sapiens OX=9606 GN=TTC12 PE=1 SV=1	TTC12	76	123	90.6	141.3	102.6	136.8	177.6	183.8	188.7	174.8
Superoxide dismutase [Mn], mitochondrial OS=Homo sapiens OX=9606 GN=SOD2 PE=1 SV=3	SOD2	1017.1	832.7	1106	1648.3	1070.7	1398.4	1223.9	1728.7	2170	2154.3
Craniofacial development protein 1 OS=Homo sapiens OX=9606 GN=CFDP1 PE=1 SV=1	CFDP1	872.7	1084.3	987.9	1141.7	861.4	1616	1527	1473.2	1627.1	1520.6
Methylosome protein 50 OS=Homo sapiens OX=9606 GN=WDR77 PE=1 SV=1	WDR77	390.9	501.4	454.3	528.6	413.3	733	732.9	691.5	783.7	673.8
Telomeric repeat-binding factor 2 OS=Homo sapiens OX=9606 GN=TERF2 PE=1 SV=3	TERF2	45.6	75.3	58.3	72.3	57.5	101.7	79.8	108.7	89.5	94.2
Transcriptional repressor protein YY1 OS=Homo sapiens OX=9606 GN=YY1 PE=1 SV=2	YY1	313.8	555	468.3	432.2	401.1	458.6	639.2	711.2	635.6	680.8
Tropomodulin-2 OS=Homo sapiens OX=9606 GN=TMOD2 PE=1 SV=1	TMOD2	124.2	187.3	234.8	164.6	125.7	338	247.2	203.6	291.4	205.7
Fascin OS=Homo sapiens OX=9606 GN=FSCN1 PE=1 SV=3	FSCN1	1459.2	1819.6	1623.6	1977.1	1618.8	2529	2795.3	2808	2772.6	2645
Fanconi anemia group D2 protein OS=Homo sapiens OX=9606 GN=FANCD2 PE=1 SV=2	FANCD2	96.2	128.8	122.4	145.7	135.3	166.3	235	188.2	206.7	174.7
D-dopachrome decarboxylase OS=Homo sapiens OX=9606 GN=DDT PE=1 SV=3	DDT	893.6	1007.3	2170	619.4	549.7	1589.3	1269.6	1697.4	2076.6	2411
Alpha-fetoprotein OS=Homo sapiens OX=9606 GN=AFP PE=1 SV=1	AFP	716.4	473	886.4	808.1	663	1439.6	1207.5	1153.3	1137.9	931.9
Telomeric repeat-binding factor 2-interacting protein 1 OS=Homo sapiens OX=9606 GN=TERF2IP PE=1 SV=1	TERF2IP	45.8	54.7	59.2	69.2	45.5	90.2	79.2	75.9	92.1	87.4
DNA replication complex GINS protein PSF3 OS=Homo sapiens OX=9606 GN=GINS3 PE=1 SV=1	GINS3	54.1	75.4	100.8	72.7	50.8	95.6	82	101.6	114.9	126.5
Inter-alpha-trypsin inhibitor heavy chain H2 OS=Homo sapiens OX=9606 GN=ITIH2 PE=1 SV=2	ITIH2	161.8	81.1	236.3	154.9	148.5	286	315.5	236.7	289	161.4
NADH dehydrogenase [ubiquinone] 1 alpha subcomplex subunit 5 OS=Homo sapiens OX=9606 GN=NDUFA5 PE=1 SV=3	NDUFA5	786.1	1041.4	1309.8	842.1	837.1	1386.9	1317.7	1385.1	1668.2	1614.7
DNA polymerase epsilon subunit 4 OS=Homo sapiens OX=9606 GN=POLE4 PE=1 SV=2	POLE4	13.1	16	19.2	19.3	13.8	25.3	20	19	27.1	26
Alpha-2-HS-glycoprotein OS=Homo sapiens OX=9606 GN=AHSG PE=1 SV=2	AHSG	899	593.6	1331.1	987.9	785.3	1854.3	1650.4	1404.4	1383.3	891.9
WD repeat-containing protein 13 OS=Homo sapiens OX=9606 GN=WDR13 PE=1 SV=2	WDR13	141.8	73.6	112.6	136.7	140.6	117.6	226.1	140.4	230	226
Inosine triphosphate pyrophosphatase OS=Homo sapiens OX=9606 GN=ITPA PE=1 SV=2	ITPA	545.1	713.8	719.2	628.4	487.2	956.8	862.4	902.5	934.2	969.1
Aspartate aminotransferase, mitochondrial OS=Homo sapiens OX=9606 GN=GOT2 PE=1 SV=3	GOT2	4041.1	5302	5336	6215.3	5204.5	7523.4	7755	7678.8	8667.8	7846.9
Nuclear transport factor 2 OS=Homo sapiens OX=9606 GN=NUTF2 PE=1 SV=1	NUTF2	1064.4	1153.9	1529.4	982.1	893.1	1819.1	1654.1	1835.6	1872.4	1938.2
Exosome complex component RRP46 OS=Homo sapiens OX=9606 GN=EXOSC5 PE=1 SV=1	EXOSC5	39.8	43.5	40.9	53.7	44.8	66.4	72.4	71.9	73.8	71.7
Golgi apparatus protein 1 OS=Homo sapiens OX=9606 GN=GLG1 PE=1 SV=2	GLG1	344	438.2	391.6	426.1	390.6	585.3	626.9	585.6	630.7	607.7
Prefoldin subunit 3 OS=Homo sapiens OX=9606 GN=VBP1 PE=1 SV=4	VBP1	842.4	1070.5	1245.4	944.4	777	1467.8	1306.3	1448.4	1646.9	1664.2
Prefoldin subunit 5 OS=Homo sapiens OX=9606 GN=PFDN5 PE=1 SV=2	PFDN5	1637.4	2192.1	2347.5	1681.6	1427.7	2848.5	2446.1	2633.3	3089.2	2856.1
Alpha-galactosidase A OS=Homo sapiens OX=9606 GN=GLA PE=1 SV=1	GLA	542.5	695.6	664	746.2	632.6	1160.5	980.1	1050.1	1030.6	980.3
Prefoldin subunit 2 OS=Homo sapiens OX=9606 GN=PFDN2 PE=1 SV=1	PFDN2	634.5	747.6	719.8	828.6	625.8	1105.3	1060.4	988.2	1043.6	1041.4
Vacuolar protein sorting-associated protein 37B (Fragment) OS=Homo sapiens OX=9606 GN=VPS37B PE=1 SV=1	VPS37B	20.6	25.6	17.5	15.6	12.8	22.5	20	26.1	21.5	24.2
Nucleoplasmin-3 OS=Homo sapiens OX=9606 GN=NPM3 PE=1 SV=3	NPM3	389.1	486	668.1	475.2	402.6	672.9	588.8	674.1	763.7	790.7
NADH dehydrogenase [ubiquinone] iron-sulfur protein 8, mitochondrial OS=Homo sapiens OX=9606 GN=NDUFS8 PE=1 SV=1	NDUFS8	177.2	260.6	254.4	226.3	204.2	306.5	286.5	322.8	311.3	345.5
Succinate--CoA ligase [ADP-forming] subunit beta, mitochondrial OS=Homo sapiens OX=9606 GN=SUCLA2 PE=1 SV=1	SUCLA2	506.7	687.2	679.2	660.3	630.5	957.5	969.5	897	959.2	893.5
NADH dehydrogenase [ubiquinone] iron-sulfur protein 2, mitochondrial OS=Homo sapiens OX=9606 GN=NDUFS2 PE=1 SV=2	NDUFS2	687.8	895.3	811.2	883.4	921.2	1105.6	1290.5	1241.6	1211	1112.9
DNA replication complex GINS protein PSF2 OS=Homo sapiens OX=9606 GN=GINS2 PE=1 SV=1	GINS2	768.5	895.7	1130.1	676.6	625.2	1321	1213.9	1326.6	1410.4	1441.7
Thioredoxin-disulfide reductase OS=Homo sapiens OX=9606 GN=TXNRD2 PE=1 SV=1	TXNRD2	308.8	408.4	374.3	391.9	344.7	592.3	515.9	571.5	536.1	533
M-phase phosphoprotein 6 OS=Homo sapiens OX=9606 GN=MPHOSPH6 PE=1 SV=1	MPHOSPH6	24.5	30.1	35.2	26.8	27.8	43.4	35	39	54.6	43.7
SH3 and PX domain-containing protein 2B OS=Homo sapiens OX=9606 GN=SH3PXD2B PE=1 SV=3	SH3PXD2B	29.8	40.1	39.7	42.2	42.6	57.5	56.6	57.9	53.7	50.5
Sorbitol dehydrogenase OS=Homo sapiens OX=9606 GN=SORD PE=1 SV=4	SORD	632.2	802.2	738.7	830.9	654.8	1102.7	1085	1077.6	1097.4	1030.7
UPF0600 protein C5orf51 OS=Homo sapiens OX=9606 GN=C5orf51 PE=1 SV=1	C5orf51	301.6	368.5	338.1	416.1	303.8	474.6	521.2	495.3	509.2	475.6
Histidine triad nucleotide-binding protein 2, mitochondrial OS=Homo sapiens OX=9606 GN=HINT2 PE=1 SV=1	HINT2	175.3	298.8	370.3	182.7	168	298.6	217.8	329	368.1	378.2
Ubiquitin-related modifier 1 OS=Homo sapiens OX=9606 GN=URM1 PE=1 SV=1	URM1	13.5	17	19.9	11.9	14.1	22.9	19.9	17.5	31.5	24.7
Procollagen-lysine 5-dioxygenase OS=Homo sapiens OX=9606 GN=PLOD2 PE=1 SV=1	PLOD2	21.7	31.1	30.7	33	30.2	35.9	43.2	48.4	44.9	38.4
Histone H1.3 OS=Homo sapiens OX=9606 GN=H1-3 PE=1 SV=2	H1-3	416.6	619.1	344.3	982.2	326.6	814.9	519.4	858.2	797.5	505.3
Lactoylglutathione lyase OS=Homo sapiens OX=9606 GN=GLO1 PE=1 SV=4	GLO1	2566.3	2474.1	2998.7	2301.9	2038.3	3588.9	3426.1	3347	3537.2	3862.1
Electron transfer flavoprotein subunit alpha, mitochondrial OS=Homo sapiens OX=9606 GN=ETFA PE=1 SV=1	ETFA	3030.4	3754.3	3989.4	2978.6	3009.1	5114.3	4654.4	4735.9	4898.7	4753
Putative transferase CAF17, mitochondrial OS=Homo sapiens OX=9606 GN=IBA57 PE=1 SV=1	IBA57	184.1	240.5	213.9	235	255.4	276.2	335.5	334.3	315.5	308.1
Mitochondrial potassium channel OS=Homo sapiens OX=9606 GN=CCDC51 PE=1 SV=2	CCDC51	43.8	53.1	47.3	47.8	55.8	57.2	82	67.7	71.7	65.9
Tubulin-specific chaperone cofactor E-like protein OS=Homo sapiens OX=9606 GN=TBCEL PE=1 SV=2	TBCEL	217.8	259.6	244.1	291.6	228.2	365.8	349	366.1	353.4	369
Sperm-associated antigen 7 OS=Homo sapiens OX=9606 GN=SPAG7 PE=1 SV=1	SPAG7	12.8	18.2	12.3	19.9	12.1	22.3	17.7	22.6	22.5	18.6
39S ribosomal protein L46, mitochondrial OS=Homo sapiens OX=9606 GN=MRPL46 PE=1 SV=1	MRPL46	890.4	1132.4	1286.1	950.9	921.5	1495.7	1461.4	1519.2	1659.8	1521.7
Mitochondrial import inner membrane translocase subunit TIM50 OS=Homo sapiens OX=9606 GN=TIMM50 PE=1 SV=2	TIMM50	753.8	1112.3	982.9	898.8	949.8	1272	1391.6	1400.3	1385.3	1433.2
RNA-binding protein NOB1 OS=Homo sapiens OX=9606 GN=NOB1 PE=1 SV=1	NOB1	13.7	26.3	23.4	25.6	22.3	26	31.8	39.7	34.2	32.4
Dolichol-phosphate mannosyltransferase subunit 3 OS=Homo sapiens OX=9606 GN=DPM3 PE=1 SV=2	DPM3	11.4	14.1	9.6	10.5	14	10.5	18.6	15.2	16.9	21.5
Gamma-aminobutyric acid receptor-associated protein-like 2 OS=Homo sapiens OX=9606 GN=GABARAPL2 PE=1 SV=1	GABARAPL2	980.3	1253.3	1214.8	904.6	803.4	1644	1660.3	1502.3	1760.4	1546.5
Guanosine-3',5'-bis(diphosphate) 3'-pyrophosphohydrolase MESH1 OS=Homo sapiens OX=9606 GN=HDDC3 PE=1 SV=3	HDDC3	275.6	343.8	339.4	336.5	269.3	445.9	471.8	431.8	463.5	428.3
Importin-5 OS=Homo sapiens OX=9606 GN=IPO5 PE=1 SV=4	IPO5	7152.4	8728	8084.9	9651.2	7385	11768.6	11949.3	11738.1	11111.4	11441
Cysteine desulfurase, mitochondrial OS=Homo sapiens OX=9606 GN=NFS1 PE=1 SV=3	NFS1	9.6	16.2	14.8	13.7	12.8	17.3	16.3	17.5	18.7	19.6
Gc-globulin OS=Homo sapiens OX=9606 GN=GC PE=1 SV=1	GC	123	86.8	190.6	152.8	122.4	260.5	224.9	201.9	202.8	151
Ubiquitin-conjugating enzyme E2 T OS=Homo sapiens OX=9606 GN=UBE2T PE=1 SV=1	UBE2T	428.6	417	492.1	398.6	356.9	530.6	568.8	566.1	590.4	655.1
39S ribosomal protein L10, mitochondrial OS=Homo sapiens OX=9606 GN=MRPL10 PE=1 SV=3	MRPL10	231.7	244.4	347.3	289.3	333.5	374.8	485.7	489.9	471.7	472.7
Acidic leucine-rich nuclear phosphoprotein 32 family member A OS=Homo sapiens OX=9606 GN=ANP32A PE=1 SV=1	ANP32A	1320.4	1757.2	1819.2	1235	1094.3	2192.1	1846.6	2178.3	2408.1	2424.4
Cytosolic iron-sulfur assembly component 2B OS=Homo sapiens OX=9606 GN=CIAO2B PE=1 SV=1	CIAO2B	244.7	291.7	266.2	305.7	233.2	385.5	377.9	379	403.9	384.9
tRNA (guanine-N(7)-)-methyltransferase non-catalytic subunit WDR4 OS=Homo sapiens OX=9606 GN=WDR4 PE=1 SV=2	WDR4	207.6	262.2	223.7	273.3	220.2	319.6	355.5	328.4	346.8	343
Dolichol-phosphate mannosyltransferase subunit 1 (Fragment) OS=Homo sapiens OX=9606 GN=DPM1 PE=1 SV=1	DPM1	128.1	182.9	167.8	137.3	180.7	193.1	247.6	253.6	234.4	267.4
Bifunctional methylenetetrahydrofolate dehydrogenase/cyclohydrolase, mitochondrial OS=Homo sapiens OX=9606 GN=MTHFD2 PE=1 SV=2	MTHFD2	846.1	1053.1	1005.6	1053.2	877.7	1535.3	1339.6	1414	1286.1	1354.8
Actin, cytoplasmic 1 (Fragment) OS=Homo sapiens OX=9606 GN=ACTB PE=1 SV=1	ACTB	19	42	21.1	29.6	25	33.2	35.5	34.8	38.9	30.7
4F2 cell-surface antigen heavy chain OS=Homo sapiens OX=9606 GN=SLC3A2 PE=1 SV=1	SLC3A2	727.1	982.9	965.2	849.6	869.5	1184.4	1327.8	1227.2	1373.5	1367.1
Transcription termination factor 2 OS=Homo sapiens OX=9606 GN=TTF2 PE=1 SV=2	TTF2	17.4	23	16.4	19.2	17.1	27.6	30.8	29	25.2	27.6
Aminoacyl tRNA synthase complex-interacting multifunctional protein 1 OS=Homo sapiens OX=9606 GN=AIMP1 PE=1 SV=2	AIMP1	1633.4	2139.9	2000	2146.3	1823.3	2838.4	2809	2798.7	2788.4	2764.6
Exosome complex component RRP42 OS=Homo sapiens OX=9606 GN=EXOSC7 PE=1 SV=3	EXOSC7	434.8	542.3	515.2	629.8	490.5	714.9	757.4	728.1	735.4	668.6
60S ribosome subunit biogenesis protein NIP7 homolog OS=Homo sapiens OX=9606 GN=NIP7 PE=1 SV=1	NIP7	152.3	218.1	186.6	215.7	219.2	256.3	292.2	286.1	281.8	265.4
Prefoldin subunit 6 OS=Homo sapiens OX=9606 GN=PFDN6 PE=1 SV=1	PFDN6	769.7	1105.4	1040.1	997.4	753.8	1263.2	1267.6	1166.7	1460.2	1144.3
28S ribosomal protein S29, mitochondrial (Fragment) OS=Homo sapiens OX=9606 GN=DAP3 PE=1 SV=1	DAP3	30.2	46.1	57	32	30.7	49.5	45	54.5	46.4	56.7
Lysosome-associated membrane glycoprotein 1 OS=Homo sapiens OX=9606 GN=LAMP1 PE=1 SV=3	LAMP1	45.7	61.7	58.3	55.7	46.1	74.9	76.2	71.6	74.7	76.4
Esterase OVCA2 OS=Homo sapiens OX=9606 GN=OVCA2 PE=1 SV=1	OVCA2	84.1	104.6	100.8	106.3	88.1	133	142.8	140.2	144	128.3
Lysosomal alpha-glucosidase OS=Homo sapiens OX=9606 GN=GAA PE=1 SV=4	GAA	11.1	12.4	10	16.7	11.5	13.7	17.4	14.4	17.7	17.2
Ubiquitin-conjugating enzyme E2 variant 2 OS=Homo sapiens OX=9606 GN=UBE2V2 PE=1 SV=4	UBE2V2	170.5	220.7	271.5	182.3	144.9	278.3	252.7	279	299.6	288.9
Putative oxidoreductase GLYR1 (Fragment) OS=Homo sapiens OX=9606 GN=GLYR1 PE=1 SV=8	GLYR1	40.7	55.5	48.6	59.6	72.5	47.3	81.1	72.6	77.3	73.9
Protein lin-28 homolog B OS=Homo sapiens OX=9606 GN=LIN28B PE=1 SV=1	LIN28B	130	160.5	154.6	143.8	142.9	170.4	214.7	210.8	209.3	213.1
Glutathione synthetase OS=Homo sapiens OX=9606 GN=GSS PE=1 SV=1	GSS	475.3	490.1	491.8	562.9	435.2	684.6	716.9	664.6	728.5	654.8
Nucleolar and coiled-body phosphoprotein 1 OS=Homo sapiens OX=9606 GN=NOLC1 PE=1 SV=1	NOLC1	108.4	103.4	168.2	108.3	93.6	166.7	137.3	159.7	188	188.5
Splicing factor 3B subunit 5 OS=Homo sapiens OX=9606 GN=SF3B5 PE=1 SV=1	SF3B5	1219	1844.3	2434	1625.1	1328.2	1974.8	1735.3	1919.7	2310	2547.2
Serine/arginine-rich splicing factor 10 OS=Homo sapiens OX=9606 GN=SRSF10 PE=1 SV=1	SRSF10	13.7	8.4	40.2	19.5	20.9	14.4	13	18.9	25.1	37.4
Activated RNA polymerase II transcriptional coactivator p15 OS=Homo sapiens OX=9606 GN=SUB1 PE=1 SV=3	SUB1	2545.6	3869.4	3788.1	2712.5	2361.6	4106.1	3933	4411.8	5135.7	5217.2
Threonine--tRNA ligase, mitochondrial OS=Homo sapiens OX=9606 GN=TARS2 PE=1 SV=1	TARS2	486.9	641.3	548.1	713.8	667.1	785.9	934.8	909.2	836.7	839.2
Poly [ADP-ribose] polymerase OS=Homo sapiens OX=9606 GN=PARP2 PE=1 SV=1	PARP2	25.8	52.7	22.3	41.1	50.2	44.2	63.4	73.2	52.8	63.1
Coiled-coil domain-containing protein 43 OS=Homo sapiens OX=9606 GN=CCDC43 PE=1 SV=2	CCDC43	1116.4	1452.1	1244.6	1551.1	1125.9	1925.1	1730	1707.1	1632.3	1709
Hydroxymethylglutaryl-CoA lyase, mitochondrial OS=Homo sapiens OX=9606 GN=HMGCL PE=1 SV=2	HMGCL	30	35.3	32.2	44.7	40.7	48.4	47.7	49.1	46.6	49.9
Phosphoribosylformylglycinamidine synthase OS=Homo sapiens OX=9606 GN=PFAS PE=1 SV=4	PFAS	2795.2	3059.3	3230.3	3233.4	2653.2	3956.7	4132.2	3936.2	4153.8	3943.4
Gamma-tubulin complex component 3 OS=Homo sapiens OX=9606 GN=TUBGCP3 PE=1 SV=2	TUBGCP3	22.7	30.4	22.4	25.2	24.3	30.9	34.9	33.8	41.1	35.9
ER membrane protein complex subunit 1 OS=Homo sapiens OX=9606 GN=EMC1 PE=1 SV=1	EMC1	90.9	137.6	124.5	118.4	133.6	146.5	173.5	172.4	167	165.8
Thyroid receptor-interacting protein 6 OS=Homo sapiens OX=9606 GN=TRIP6 PE=1 SV=3	TRIP6	52.5	58.2	68.2	69	59.7	87.4	78.8	84.1	82	88
Glutamate-rich WD repeat-containing protein 1 OS=Homo sapiens OX=9606 GN=GRWD1 PE=1 SV=1	GRWD1	711.7	760.2	881.4	786.5	662.1	1046.2	1001.5	1054.4	1082.1	1093.3
Cystathionine beta-synthase-like protein OS=Homo sapiens OX=9606 GN=CBSL PE=1 SV=1	CBSL	561.4	701.5	622.3	785.6	625.8	900.3	982.3	985	912.2	911.3
DNA-directed RNA polymerases I and III subunit RPAC2 OS=Homo sapiens OX=9606 GN=POLR1D PE=1 SV=1	POLR1D	231	353.4	342.7	264.2	242.6	370.5	297	356.9	364.5	372
Programmed cell death protein 4 OS=Homo sapiens OX=9606 GN=PDCD4 PE=1 SV=2	PDCD4	79.6	110.8	89.1	101.7	89.9	133.8	120.8	134.7	129.7	123.9
Alanine--tRNA ligase, cytoplasmic OS=Homo sapiens OX=9606 GN=AARS1 PE=4 SV=1	AARS1	3564.2	4370.7	3999.1	4594.3	3552.2	5413.5	5731.4	5554	5638.2	5347
Adapter molecule crk OS=Homo sapiens OX=9606 GN=CRK PE=1 SV=2	CRK	92.5	132.8	110.6	107	81.4	148	111	159.4	130.7	136.9
28S ribosomal protein S31, mitochondrial OS=Homo sapiens OX=9606 GN=MRPS31 PE=1 SV=3	MRPS31	353.7	539.9	596.4	368.5	395.3	565.3	589.7	614.8	698.4	738.2
Cytochrome c oxidase subunit 5A, mitochondrial OS=Homo sapiens OX=9606 GN=COX5A PE=1 SV=2	COX5A	211.1	372.2	534	180.5	207.8	337	251.5	345.6	479.2	542
Cyclin-dependent kinase-like 5 OS=Homo sapiens OX=9606 GN=CDKL5 PE=1 SV=2	CDKL5	216.6	485.4	244	424.7	253.6	391.9	313.5	433.9	259.7	370.3
EKC/KEOPS complex subunit GON7 OS=Homo sapiens OX=9606 GN=GON7 PE=1 SV=2	GON7	153.8	183.3	161	189.3	149.5	257.6	230.7	226.9	224.1	218.3
28S ribosomal protein S27, mitochondrial (Fragment) OS=Homo sapiens OX=9606 GN=MRPS27 PE=1 SV=1	MRPS27	840	1092.9	1062	1094.4	1095	1338.6	1502.9	1377.2	1446.6	1339.1
Metallothionein-2 OS=Homo sapiens OX=9606 GN=MT2A PE=1 SV=1	MT2A	570	600.5	566.2	749.2	463.3	867.9	798.7	820.7	743.1	675.8
Steroid receptor RNA activator 1 OS=Homo sapiens OX=9606 GN=SRA1 PE=1 SV=1	SRA1	311.7	385	417.7	348.9	292.1	496.8	490.2	463.3	595.7	586.1
Alpha- and gamma-adaptin-binding protein p34 OS=Homo sapiens OX=9606 GN=AAGAB PE=1 SV=1	AAGAB	453.1	515.2	513.8	543.8	453.4	721.1	747.3	669.1	798.9	660.7
Ribosome biogenesis protein BRX1 homolog OS=Homo sapiens OX=9606 GN=BRIX1 PE=1 SV=2	BRIX1	56.7	120.4	58	117.8	88.9	90.3	129.3	171.6	102.5	139
IST1 homolog OS=Homo sapiens OX=9606 GN=IST1 PE=1 SV=1	IST1	559	769.4	668	844.7	555.6	1079.7	988	974.8	927.1	808.9
Prefoldin subunit 4 OS=Homo sapiens OX=9606 GN=PFDN4 PE=1 SV=1	PFDN4	608.2	691.6	666.2	738.3	589.8	903.8	927.7	839.1	962.4	858.7
AP-1 complex subunit gamma-1 OS=Homo sapiens OX=9606 GN=AP1G1 PE=1 SV=5	AP1G1	1195.1	1543.4	1326.9	1711	1404.3	1899.5	2108.2	2011.1	1879.7	1885
NADH dehydrogenase [ubiquinone] 1 alpha subcomplex assembly factor 3 OS=Homo sapiens OX=9606 GN=NDUFAF3 PE=1 SV=1	NDUFAF3	22.9	35.4	30.3	32.7	28.2	42.5	35.6	38.8	41.3	42.2
28S ribosomal protein S34, mitochondrial OS=Homo sapiens OX=9606 GN=MRPS34 PE=1 SV=2	MRPS34	83.1	113.6	98.7	107.3	130.1	101.8	156.4	153.1	135.3	135.4
ATP-dependent RNA helicase DDX19A OS=Homo sapiens OX=9606 GN=DDX19A PE=1 SV=1	DDX19A	1357.6	1574.2	1556.9	1753.7	1383.5	2122.4	2221.4	2095.5	2155.7	2030.8
MMS19 nucleotide excision repair protein homolog OS=Homo sapiens OX=9606 GN=MMS19 PE=1 SV=2	MMS19	458.1	511.8	477.7	622.1	507.8	647.5	721.7	716.9	745.3	735.6
NEDD8-activating enzyme E1 catalytic subunit OS=Homo sapiens OX=9606 GN=UBA3 PE=1 SV=2	UBA3	171.4	201	197.9	227.6	168.8	271.4	262.8	256.8	238.3	277.5
Adenylate kinase isoenzyme 6 OS=Homo sapiens OX=9606 GN=AK6 PE=1 SV=1	AK6	16.9	18.6	16.6	21.5	20.1	31.7	24.1	24.5	24.8	24.8
Protein phosphatase 1 regulatory subunit 7 (Fragment) OS=Homo sapiens OX=9606 GN=PPP1R7 PE=1 SV=1	PPP1R7	256.4	288.6	321	296.7	239.9	365.6	373.4	374.2	402.3	348.2
DNA replication complex GINS protein PSF1 OS=Homo sapiens OX=9606 GN=GINS1 PE=1 SV=1	GINS1	96.5	112.2	102.4	110.4	102.9	117.8	155.3	152.4	138.8	144.7
Protein CutA OS=Homo sapiens OX=9606 GN=CUTA PE=1 SV=2	CUTA	220.1	194.9	246.4	234.3	160.6	244.4	251.6	281.5	305.9	276.4
Uncharacterized protein C15orf39 (Fragment) OS=Homo sapiens OX=9606 GN=C15orf39 PE=1 SV=1	C15orf39	31.3	40.5	37.8	45.8	38.3	50.3	53.2	44.2	46.7	55.2
PSME3-interacting protein OS=Homo sapiens OX=9606 GN=PSME3IP1 PE=1 SV=1	PSME3IP1	314.5	385.5	351.7	431.2	317	514.6	483.7	471	483.4	494.3
Acyl-coenzyme A thioesterase 1 OS=Homo sapiens OX=9606 GN=ACOT1 PE=1 SV=1	ACOT1	112.6	163	131	146.3	146.1	177.1	197.6	197.5	189.6	181.1
Aspartate--tRNA ligase, mitochondrial OS=Homo sapiens OX=9606 GN=DARS2 PE=1 SV=1	DARS2	672.8	900.2	831.5	943.5	909.4	1058.9	1189.2	1193.6	1107.8	1103.6
Thioredoxin OS=Homo sapiens OX=9606 GN=TXN PE=1 SV=3	TXN	3114.9	3975.7	3762.4	3267.3	2648.3	4896.4	4442.3	4467.8	4282.8	4025.2
Integrator complex subunit 14 OS=Homo sapiens OX=9606 GN=INTS14 PE=1 SV=1	INTS14	12.3	16.8	17.1	17.9	15	24.6	21.6	20	20.7	24
AP-3 complex subunit sigma-1 OS=Homo sapiens OX=9606 GN=AP3S1 PE=1 SV=1	AP3S1	271.7	192.6	237	327.3	288.4	224.2	260.8	285.7	409	503.5
Peptidyl-prolyl cis-trans isomerase E OS=Homo sapiens OX=9606 GN=PPIE PE=1 SV=1	PPIE	375.6	520.6	585.3	502.4	375.4	589.2	513.5	573.3	701.1	701.3
Myristoylated alanine-rich C-kinase substrate OS=Homo sapiens OX=9606 GN=MARCKS PE=1 SV=4	MARCKS	2584.9	3566.3	3263.9	3375.1	2946.4	4356.7	4575.5	4066.2	4849.6	3952.6
Ankyrin repeat and LEM domain-containing protein 2 (Fragment) OS=Homo sapiens OX=9606 GN=ANKLE2 PE=1 SV=1	ANKLE2	25.6	68.1	37.7	60.2	40.5	40.1	52.4	70.1	49.9	68.8
39S ribosomal protein L40, mitochondrial OS=Homo sapiens OX=9606 GN=MRPL40 PE=1 SV=1	MRPL40	722.5	1266.2	1340.6	1000.6	903.4	1131.1	1071.5	1232.6	1471.8	1664.5
Enhancer of mRNA-decapping protein 4 OS=Homo sapiens OX=9606 GN=EDC4 PE=1 SV=1	EDC4	1576.8	1847.6	1833.5	2128.7	1607.4	2532.6	2365.7	2404.8	2430.4	2344.3
39S ribosomal protein L37, mitochondrial OS=Homo sapiens OX=9606 GN=MRPL37 PE=1 SV=1	MRPL37	54.8	81.3	63.5	69.4	88.5	76.9	105	102.1	86.4	84
Histone-lysine N-methyltransferase SETD7 OS=Homo sapiens OX=9606 GN=SETD7 PE=1 SV=1	SETD7	438	540.2	586.2	494.9	421	683.6	667.7	672.4	808.1	697.1
Complex I-20kD OS=Homo sapiens OX=9606 GN=NDUFS7 PE=1 SV=1	NDUFS7	211.1	277.3	245	278.2	290.5	288.1	410.6	363.7	345.8	354.8
Paraspeckle component 1 OS=Homo sapiens OX=9606 GN=PSPC1 PE=1 SV=1	PSPC1	1920.7	2530.4	2672	2039.2	1724.3	3000.1	2517.9	2778.4	3030.8	3020.4
28S ribosomal protein S16, mitochondrial OS=Homo sapiens OX=9606 GN=MRPS16 PE=1 SV=1	MRPS16	57.7	86.6	83.5	62.8	84.5	82.2	110.5	111	109	106.9
Eukaryotic translation initiation factor 4E-binding protein 2 OS=Homo sapiens OX=9606 GN=EIF4EBP2 PE=1 SV=1	EIF4EBP2	15.6	21.2	20.6	26.5	20.2	25.2	26.4	25.6	32.9	33.3
Putative ribosome-binding factor A, mitochondrial OS=Homo sapiens OX=9606 GN=RBFA PE=1 SV=3	RBFA	14.5	24.3	20.9	21.9	26.8	22.3	31	30.4	32.2	27.8
Ubiquitin-conjugating enzyme E2 L3 OS=Homo sapiens OX=9606 GN=UBE2L3 PE=1 SV=1	UBE2L3	4055.1	5742.8	7451.2	3848.7	3276	6313.5	5228.9	6538.4	8021.9	8821.6
Charged multivesicular body protein 4a (Fragment) OS=Homo sapiens OX=9606 GN=CHMP4A PE=1 SV=1	CHMP4A	20.5	28.4	27	36.8	26.1	39.3	33.5	37.4	29.4	37.2
Tyrosine-protein kinase CSK OS=Homo sapiens OX=9606 GN=CSK PE=1 SV=1	CSK	811.4	905.8	879.6	1100.4	857.6	1195.3	1260.6	1220.8	1200.6	1220
Golgi phosphoprotein 3 OS=Homo sapiens OX=9606 GN=GOLPH3 PE=1 SV=1	GOLPH3	433.7	479.7	490.1	547.5	446.3	669.8	705.7	631.4	692.8	635
Phosphoserine aminotransferase OS=Homo sapiens OX=9606 GN=PSAT1 PE=1 SV=2	PSAT1	2174.2	2448.9	2337.5	2718.4	2107.1	3131.2	3213.3	3277.4	3073.9	2996.6
Vacuolar protein sorting-associated protein 29 OS=Homo sapiens OX=9606 GN=VPS29 PE=1 SV=1	VPS29	1132.3	1327.6	1354	1491.5	1183.3	1783.4	1901.2	1780.3	1846.9	1668.5
DNA-directed RNA polymerase III subunit RPC5 OS=Homo sapiens OX=9606 GN=POLR3E PE=1 SV=1	POLR3E	28.3	40.7	34.2	42.8	32	43.3	53.6	54.2	48.6	45.4
Exosome complex component RRP45 OS=Homo sapiens OX=9606 GN=EXOSC9 PE=1 SV=1	EXOSC9	44.1	67.7	49	55.3	65.4	61.3	86.5	72	68.3	73.6
Ribonucloprotein OS=Homo sapiens OX=9606 GN=SNU13 PE=1 SV=1	SNU13	992.7	1361.1	1438.9	1244.2	1051.5	1539.7	1404	1488.1	1609.8	1546.5
Vimentin OS=Homo sapiens OX=9606 GN=VIM PE=1 SV=4	VIM	22714.7	33092.2	35324	30891.9	26025.5	35161.5	28796.4	33013.3	38096.3	38846.7
Deoxyuridine 5'-triphosphate nucleotidohydrolase OS=Homo sapiens OX=9606 GN=DUT PE=1 SV=1	DUT	373.7	505.5	577.4	479.3	364.4	578.8	521.8	575.1	711.4	768.1
NADH dehydrogenase [ubiquinone] iron-sulfur protein 6, mitochondrial OS=Homo sapiens OX=9606 GN=NDUFS6 PE=1 SV=1	NDUFS6	287.8	436.1	439.1	352.4	308.8	467.7	384.3	424.7	473.2	437
Importin-4 OS=Homo sapiens OX=9606 GN=IPO4 PE=1 SV=2	IPO4	1850.8	2172.3	2080.3	2531	2004	2708.3	2975.3	2849.9	2976.6	2827.6
Polyadenylate-binding protein-interacting protein 1 OS=Homo sapiens OX=9606 GN=PAIP1 PE=1 SV=1	PAIP1	101.1	122.9	134.3	134.4	103	191.6	148.7	166.1	164.7	146.9
28S ribosomal protein S18b, mitochondrial OS=Homo sapiens OX=9606 GN=MRPS18B PE=1 SV=1	MRPS18B	135.3	226.5	187.5	176.1	210.3	208.2	242.4	263.2	238.6	258
Protein arginine N-methyltransferase 5 OS=Homo sapiens OX=9606 GN=PRMT5 PE=1 SV=4	PRMT5	3442.7	4128.2	3882.4	4552.2	3719.6	5298.8	5985.7	5488.1	5528.7	5090.6
Adenylate kinase 2, mitochondrial OS=Homo sapiens OX=9606 GN=AK2 PE=1 SV=2	AK2	2398.1	3919.9	4715.6	2610.2	2507.8	3689.7	3019.3	3808.5	4102.9	4382.8
Protein O-GlcNAcase OS=Homo sapiens OX=9606 GN=OGA PE=1 SV=2	OGA	186.9	229.2	191.6	247.3	166.2	287.1	281.5	263.1	249.7	251.1
Elongation factor 1-alpha 2 OS=Homo sapiens OX=9606 GN=EEF1A2 PE=1 SV=1	EEF1A2	692.8	898.5	754.9	907.2	745.8	1007.2	1130.7	1145	1005.1	1070.1
G patch domain-containing protein 4 (Fragment) OS=Homo sapiens OX=9606 GN=GPATCH4 PE=1 SV=1	GPATCH4	111.6	236.7	156.8	237.5	243.4	171.6	323.8	289.6	242.7	264.3
Actin-related protein 2/3 complex subunit 5-like protein OS=Homo sapiens OX=9606 GN=ARPC5L PE=1 SV=1	ARPC5L	59.6	94.3	107.8	72.3	60.3	91.6	87.9	88.4	101.2	110.3
Nucleophosmin (Fragment) OS=Homo sapiens OX=9606 GN=NPM1 PE=1 SV=1	NPM1	72.2	107.6	27.9	191.9	117.3	110.8	135.4	80.8	52.3	29.9
NEDD8-activating enzyme E1 regulatory subunit OS=Homo sapiens OX=9606 GN=NAE1 PE=1 SV=1	NAE1	2258.2	2941.5	2460.7	3141.4	2169.1	3466.7	3419.5	3351.9	3286.8	3281.5
Xaa-Pro aminopeptidase 3 OS=Homo sapiens OX=9606 GN=XPNPEP3 PE=1 SV=1	XPNPEP3	105.1	138.5	126.1	146	153.7	161.3	186.8	190.2	157.7	170.8
Succinate--CoA ligase [ADP/GDP-forming] subunit alpha, mitochondrial OS=Homo sapiens OX=9606 GN=SUCLG1 PE=1 SV=4	SUCLG1	1119.8	1554.9	1519.7	1354.6	1348.1	1774.7	1954.6	1953.2	1913.6	1846.9
Eukaryotic translation initiation factor 2D OS=Homo sapiens OX=9606 GN=EIF2D PE=1 SV=3	EIF2D	88.7	128.7	106.2	122.1	99.4	142.1	144.8	149.1	128.5	139.4
Pyridoxal 5'-phosphate synthase (Fragment) OS=Homo sapiens OX=9606 GN=PNPO PE=1 SV=2	PNPO	316.6	473.7	536.6	432.8	330.7	485	448.3	498.7	576.4	643.8
3-mercaptopyruvate sulfurtransferase OS=Homo sapiens OX=9606 GN=MPST PE=1 SV=3	MPST	532.3	579	697.9	559.4	473.1	748.3	725.3	731.1	822.1	804.2
Succinate dehydrogenase [ubiquinone] flavoprotein subunit, mitochondrial OS=Homo sapiens OX=9606 GN=SDHA PE=1 SV=2	SDHA	2790.2	3879.1	3634.4	3332	3467.3	4451.5	4710.1	4722.8	4676.6	4576.3
Huntingtin-interacting protein K OS=Homo sapiens OX=9606 GN=HYPK PE=1 SV=2	HYPK	1405.2	1795.6	1622.1	1890.3	1372.7	2331.4	2141.7	2106.4	2239.9	2099
Histone H2A OS=Homo sapiens OX=9606 GN=hCG_2039566 PE=3 SV=1	hCG_2039566	168.4	262.7	201.4	302.7	357.6	467.7	328.7	306.4	174	156.4
1,2-dihydroxy-3-keto-5-methylthiopentene dioxygenase OS=Homo sapiens OX=9606 GN=ADI1 PE=1 SV=1	ADI1	856.2	1317.2	1219.3	953.8	757.7	1304.1	1032.1	1293.2	1163.1	1453.8
Succinate--CoA ligase [GDP-forming] subunit beta, mitochondrial OS=Homo sapiens OX=9606 GN=SUCLG2 PE=1 SV=2	SUCLG2	1028.6	1415.5	1337.4	1398.4	1214.6	1819.3	1689.7	1729.2	1710.2	1637.9
Peptidyl-prolyl cis-trans isomerase FKBP10 OS=Homo sapiens OX=9606 GN=FKBP10 PE=1 SV=1	FKBP10	1274.8	1557.8	1541	1772	1459.6	2162.4	1960.1	1991.2	1974.1	1901.9
GMP reductase OS=Homo sapiens OX=9606 GN=GMPR2 PE=1 SV=1	GMPR2	124.8	167.5	153.3	185	149	204	208.7	217.7	206.6	201.4
Uncharacterized protein OS=Homo sapiens OX=9606 PE=1 SV=1	1	91.4	128.9	126.7	99.7	103.3	139.3	119.2	129.2	126.5	143.8
Vacuolar protein sorting-associated protein 4A OS=Homo sapiens OX=9606 GN=VPS4A PE=1 SV=1	VPS4A	49.9	49.1	48.7	54.9	47.3	63.2	76.2	62.9	72.7	63.7
Kanadaptin OS=Homo sapiens OX=9606 GN=SLC4A1AP PE=1 SV=1	SLC4A1AP	297.6	318.6	328.5	320.4	280	425.7	396.3	400.4	412.3	415.6
SUMO-conjugating enzyme UBC9 OS=Homo sapiens OX=9606 GN=UBE2I PE=1 SV=1	UBE2I	13.6	19.3	28.8	18.6	21.9	23.7	21.8	23.9	26.1	30.4
DNA polymerase epsilon catalytic subunit A OS=Homo sapiens OX=9606 GN=POLE PE=1 SV=5	POLE	169.1	233.2	192.2	269.7	231.9	256.7	316.9	316.8	296.3	284.9
Dehydrogenase/reductase SDR family member 7 OS=Homo sapiens OX=9606 GN=DHRS7 PE=1 SV=1	DHRS7	8.3	10.4	13.7	10.6	13.9	12.6	15.4	13.3	16.2	13.8
ER membrane protein complex subunit 8 OS=Homo sapiens OX=9606 GN=EMC8 PE=1 SV=1	EMC8	80.4	267.2	122.3	141.4	100.4	155.7	128.3	168.7	138.6	139.2
HAUS augmin-like complex subunit 8 OS=Homo sapiens OX=9606 GN=HAUS8 PE=1 SV=3	HAUS8	28.6	35.4	40.1	31.7	26.9	41.4	43.9	33.3	42.7	38.3
Tyrosine--tRNA ligase, mitochondrial OS=Homo sapiens OX=9606 GN=YARS2 PE=1 SV=2	YARS2	229.8	392.9	292.1	347.3	382.2	361.5	479.6	476.9	418.8	421
Alanine--tRNA ligase, mitochondrial OS=Homo sapiens OX=9606 GN=AARS2 PE=1 SV=1	AARS2	163.7	201.6	171.5	199.6	182.2	239	244.4	268.6	257.6	252.5
Protein strawberry notch homolog 1 OS=Homo sapiens OX=9606 GN=SBNO1 PE=1 SV=1	SBNO1	90.5	133.8	117.2	148.3	117.5	138.4	171.4	150.8	164.7	160.2
Large neutral amino acids transporter small subunit 1 OS=Homo sapiens OX=9606 GN=SLC7A5 PE=1 SV=2	SLC7A5	520.6	785.6	621	743.6	623	796.8	890.9	867.3	843	862.5
DNA-directed RNA polymerase II subunit RPB3 OS=Homo sapiens OX=9606 GN=POLR2C PE=1 SV=2	POLR2C	324.8	409.4	435.5	351.4	304.3	491	461.5	438.1	520	481.6
Exosome complex component RRP41 OS=Homo sapiens OX=9606 GN=EXOSC4 PE=1 SV=3	EXOSC4	484.1	543.7	527.5	551.4	473.9	686.9	678.2	655.1	726.7	655
Threonine--tRNA ligase 1, cytoplasmic OS=Homo sapiens OX=9606 GN=TARS1 PE=1 SV=3	TARS1	6680.5	9215.8	7378.6	9673.7	8123.8	10091.8	12071.4	11790.5	11123.8	10867
Protein SGT1 homolog OS=Homo sapiens OX=9606 GN=SUGT1 PE=1 SV=3	SUGT1	2472.5	3031.9	2968.7	3365.3	2531.3	3770.4	3887.9	3475.3	4045.7	3431.4
Prefoldin subunit 1 OS=Homo sapiens OX=9606 GN=PFDN1 PE=1 SV=2	PFDN1	1301.9	1502.3	1557.4	1671.3	1325.5	1925.2	1904.9	1749.4	2008.4	1906.1
WD repeat and HMG-box DNA-binding protein 1 OS=Homo sapiens OX=9606 GN=WDHD1 PE=1 SV=1	WDHD1	698.2	895.6	802.3	937.6	794.4	1047.7	1161.1	1081.5	1126.4	1023.1
ATPase GET3 OS=Homo sapiens OX=9606 GN=GET3 PE=1 SV=2	GET3	144.8	168	172.4	193.4	159.3	218.6	229.1	213.6	231.7	228.8
28S ribosomal protein S10, mitochondrial OS=Homo sapiens OX=9606 GN=MRPS10 PE=1 SV=2	MRPS10	486.7	637.6	660.1	644.6	633.7	761.4	806.2	750.4	774.3	738.6
WD repeat-containing protein 61 OS=Homo sapiens OX=9606 GN=WDR61 PE=1 SV=1	WDR61	835.6	1107.4	1035.9	989.6	819.5	1262	1184.7	1181.3	1283.6	1162
Coiled-coil domain-containing protein 58 OS=Homo sapiens OX=9606 GN=CCDC58 PE=1 SV=1	CCDC58	354.1	499.7	533.2	457.4	415.2	560.1	506.6	532.7	632.1	572.9
Nucleoporin NUP42 (Fragment) OS=Homo sapiens OX=9606 GN=NUP42 PE=1 SV=1	NUP42	25.9	41.5	39.4	43.1	31	39.3	37.7	51.7	39.5	42.7
Protein phosphatase 1A OS=Homo sapiens OX=9606 GN=PPM1A PE=1 SV=1	PPM1A	20.7	33	23.5	24.7	19.1	27.4	22.7	33.2	30.6	26.3
Low molecular weight phosphotyrosine protein phosphatase OS=Homo sapiens OX=9606 GN=ACP1 PE=1 SV=3	ACP1	350.6	496.2	567.8	423.3	335.5	527.7	471.7	531.8	635.2	654.1
COP9 signalosome complex subunit 2 OS=Homo sapiens OX=9606 GN=COPS2 PE=1 SV=1	COPS2	1353.1	1681.9	1511.1	1809.2	1493.2	2000.7	2296.7	2179.3	2121	2056.7
Distal membrane-arm assembly complex protein 2 (Fragment) OS=Homo sapiens OX=9606 GN=DMAC2 PE=1 SV=1	DMAC2	28.3	33.4	43.6	28.5	31.5	42.6	39.9	50	51.1	50.1
Centrosomal protein of 170 kDa (Fragment) OS=Homo sapiens OX=9606 GN=CEP170 PE=1 SV=1	CEP170	15.3	21.9	15	23.4	21.9	17.7	27	19.7	37.6	26.7
Enoyl-CoA hydratase, mitochondrial OS=Homo sapiens OX=9606 GN=ECHS1 PE=1 SV=4	ECHS1	3010.4	3913.2	4177.8	3087.9	3003.3	4526	3987.5	4266.5	4441.6	4244.5
GTPase KRas OS=Homo sapiens OX=9606 GN=KRAS PE=1 SV=1	KRAS	75.6	124.4	90.2	98.6	88.8	118.2	106.2	115.3	105.3	124.1
Ribonucleoside-diphosphate reductase subunit M2 OS=Homo sapiens OX=9606 GN=RRM2 PE=1 SV=1	RRM2	1263.5	1559.8	1404	1701.9	1256.4	1921	1848.8	1790.7	1783.6	1757.6
NADPH:adrenodoxin oxidoreductase, mitochondrial OS=Homo sapiens OX=9606 GN=FDXR PE=1 SV=1	FDXR	162.8	177.9	191.2	186.9	179.8	244.5	219.9	235.1	243.4	219.4
Transcription factor 25 OS=Homo sapiens OX=9606 GN=TCF25 PE=1 SV=1	TCF25	43.6	72	51.2	83.5	70.8	65.5	105.5	86	96	84.7
Gem-associated protein 5 OS=Homo sapiens OX=9606 GN=GEMIN5 PE=1 SV=3	GEMIN5	1990.6	2919.5	2237.8	2532.2	2673.3	2708.1	3583.8	3431.9	3081.7	3264.9
28S ribosomal protein S14, mitochondrial OS=Homo sapiens OX=9606 GN=MRPS14 PE=1 SV=1	MRPS14	81.6	109.5	103.8	96.8	102	85.9	119.8	132.2	116.5	139.8
E3 ubiquitin-protein ligase ARIH1 (Fragment) OS=Homo sapiens OX=9606 GN=ARIH1 PE=1 SV=1	ARIH1	191.8	235.6	202	248.6	226.9	210.9	306.4	271	296.6	265.6
Calponin OS=Homo sapiens OX=9606 GN=CNN2 PE=1 SV=1	CNN2	67.6	91.3	84.4	74	49.8	101.3	95	87.5	108.4	98.8
High affinity cationic amino acid transporter 1 OS=Homo sapiens OX=9606 GN=SLC7A1 PE=1 SV=1	SLC7A1	64	86	77.6	80.1	79.8	92.6	105.4	95	111.1	111.4
Lamina-associated polypeptide 2, isoform alpha OS=Homo sapiens OX=9606 GN=TMPO PE=1 SV=2	TMPO	625.1	844.7	775.4	749.9	654.3	972.3	951	873.3	980.5	895.4
RNA pseudouridylate synthase domain-containing protein 2 OS=Homo sapiens OX=9606 GN=RPUSD2 PE=1 SV=2	RPUSD2	49.2	77	64.5	79.9	64	76.4	94.2	90.4	88.8	87.3
Prolyl 4-hydroxylase subunit alpha-1 OS=Homo sapiens OX=9606 GN=P4HA1 PE=1 SV=2	P4HA1	41.5	84.3	58.9	68.8	59.4	70.9	84	77.6	81.9	65
High mobility group nucleosome-binding domain-containing protein 5 (Fragment) OS=Homo sapiens OX=9606 GN=HMGN5 PE=1 SV=1	HMGN5	478.5	600.9	554.1	654.1	513.6	754.7	723.1	703.9	721.5	715.1
Histone H1.2 OS=Homo sapiens OX=9606 GN=H1-2 PE=1 SV=2	H1-2	1314.2	1769.4	1022.5	2959	1008.5	2358.9	1547.1	2408.7	2205.6	1377.6
Methionine aminopeptidase 1 OS=Homo sapiens OX=9606 GN=METAP1 PE=1 SV=2	METAP1	1012.8	1189.9	1221.1	923.3	1069.3	1330.7	1496.7	1467.2	1474.1	1459.8
ATP-dependent 6-phosphofructokinase, muscle type OS=Homo sapiens OX=9606 GN=PFKM PE=1 SV=2	PFKM	939	1336.1	1006.5	1343.2	1306.1	1399.4	1737.3	1798.3	1489.7	1618
Signal recognition particle 14 kDa protein OS=Homo sapiens OX=9606 GN=SRP14 PE=1 SV=2	SRP14	818.5	1199.9	1113.6	1091.6	1079	1129.7	1464.3	1530	1324.5	1452.3
Acyl carrier protein, mitochondrial OS=Homo sapiens OX=9606 GN=NDUFAB1 PE=1 SV=3	NDUFAB1	2062	2862	2872.7	2264.2	2176.9	3289.9	3066.6	3051.6	3257.6	2969.5
NADH dehydrogenase [ubiquinone] iron-sulfur protein 3, mitochondrial OS=Homo sapiens OX=9606 GN=NDUFS3 PE=1 SV=1	NDUFS3	1198.9	1523.8	1476.4	1559.6	1382.6	1881	1850.4	1871.1	1868.6	1742.6
28S ribosomal protein S23, mitochondrial OS=Homo sapiens OX=9606 GN=MRPS23 PE=1 SV=2	MRPS23	399.5	599.8	634.2	538.2	493	645.8	582.5	612.3	698.7	672.6
Queuine tRNA-ribosyltransferase catalytic subunit 1 OS=Homo sapiens OX=9606 GN=QTRT1 PE=1 SV=3	QTRT1	69.8	67.5	63.6	81.6	69.8	88.9	93.8	96.3	94.9	95.2
Translocon-associated protein subunit delta OS=Homo sapiens OX=9606 GN=SSR4 PE=1 SV=1	SSR4	313.4	504.4	451.5	331.1	464.7	494.3	614.1	572.2	560.1	565.8
Tetratricopeptide repeat protein 38 OS=Homo sapiens OX=9606 GN=TTC38 PE=1 SV=1	TTC38	38	47	43.1	49.1	46	56.6	57.3	65.7	68.7	61.4
Pyruvate dehydrogenase phosphatase regulatory subunit, mitochondrial OS=Homo sapiens OX=9606 GN=PDPR PE=1 SV=2	PDPR	86.1	123.2	116.2	111.1	114.2	150.6	150.1	138.3	133.3	137.3
39S ribosomal protein L15, mitochondrial (Fragment) OS=Homo sapiens OX=9606 GN=MRPL15 PE=1 SV=2	MRPL15	48.3	69.6	66.4	66.3	83.5	72.5	94.2	82.7	78.6	101.1
Sodium-coupled neutral amino acid transporter 2 OS=Homo sapiens OX=9606 GN=SLC38A2 PE=1 SV=2	SLC38A2	84.4	104.9	106.5	101.9	89.3	130.5	127.9	119.4	129.7	121.1
Cold-inducible RNA-binding protein OS=Homo sapiens OX=9606 GN=CIRBP PE=1 SV=1	CIRBP	1397.1	2035.9	2012	1935.6	1591.8	2077	1991.3	2131.9	2451.3	2190.5
Leucine-rich repeat-containing protein 47 OS=Homo sapiens OX=9606 GN=LRRC47 PE=1 SV=1	LRRC47	2013	2462.6	2889.1	1962.2	1911.8	2842.5	2999.5	2951.5	3065.7	2986.8
Peptidyl-prolyl cis-trans isomerase FKBP3 OS=Homo sapiens OX=9606 GN=FKBP3 PE=1 SV=1	FKBP3	2468.7	3475.8	3427.3	2995.5	2345.3	3671.9	3278	3767.9	4025.5	4135
Peroxisomal biogenesis factor 19 OS=Homo sapiens OX=9606 GN=PEX19 PE=1 SV=1	PEX19	1061.7	1191.2	1200.7	1265	1024.1	1447	1492.6	1315.2	1525.3	1392.9
U6 snRNA-associated Sm-like protein LSm4 (Fragment) OS=Homo sapiens OX=9606 GN=LSM4 PE=1 SV=1	LSM4	361.8	680.1	1124.5	380.3	422.2	538	494	686.3	805.9	967.3
RNA polymerase-associated protein RTF1 homolog OS=Homo sapiens OX=9606 GN=RTF1 PE=1 SV=4	RTF1	788.2	1035.1	965.8	1052.3	831.9	1314.1	1205.2	1219.4	1195.6	1176.5
DNA-directed RNA polymerases I and III subunit RPAC1 OS=Homo sapiens OX=9606 GN=POLR1C PE=1 SV=1	POLR1C	396.3	536.1	431.7	534.2	422.9	607.6	579.7	585.5	557.7	574.1
2'-deoxynucleoside 5'-phosphate N-hydrolase 1 OS=Homo sapiens OX=9606 GN=DNPH1 PE=1 SV=1	DNPH1	713.9	868.1	1029.9	757	584.7	1059.6	970.1	1111.3	1203.4	1188.9
Phenylalanine--tRNA ligase OS=Homo sapiens OX=9606 GN=FARSA PE=1 SV=1	FARSA	810	1111.7	919.6	1130.6	976	1200.1	1394	1365.8	1268.2	1238.3
Spartin OS=Homo sapiens OX=9606 GN=SPART PE=1 SV=1	SPART	587.4	817.3	696.6	807.4	617.4	907.5	927.2	866	952.4	857
Protein kinase C-binding protein 1 OS=Homo sapiens OX=9606 GN=ZMYND8 PE=1 SV=1	ZMYND8	97.5	123.1	105.7	136.9	105.7	159.2	142	139.1	146.4	143.2
Transducin-like enhancer protein 3 OS=Homo sapiens OX=9606 GN=TLE3 PE=1 SV=1	TLE3	128.2	177.2	151.4	178.4	143.9	212	215	212.4	204.5	193.2
39S ribosomal protein L30, mitochondrial OS=Homo sapiens OX=9606 GN=MRPL30 PE=1 SV=1	MRPL30	67.5	108.5	100.9	82.1	104.7	72.9	131.5	130	112.6	119.8
Ubiquitin thioesterase otulin OS=Homo sapiens OX=9606 GN=OTULIN PE=1 SV=3	OTULIN	133.5	170.2	137.4	177.1	128.9	197.7	177.9	200.7	181.9	200.6
Poly(rC)-binding protein 1 OS=Homo sapiens OX=9606 GN=PCBP1 PE=1 SV=2	PCBP1	1521.1	1756.6	1746.2	1901.3	1463.9	2251.5	2126.3	2029.1	2153.6	2003.9
Casein kinase II subunit beta OS=Homo sapiens OX=9606 GN=CSNK2B PE=1 SV=1	CSNK2B	868.9	1192.4	1007.2	1083.7	943.9	1301.6	1339.6	1317.8	1277	1154.7
Zinc finger CCHC-type and RNA binding motif 1, isoform CRA_b OS=Homo sapiens OX=9606 GN=ZCRB1 PE=1 SV=1	ZCRB1	101.2	146	117.3	155.1	126.9	149.5	176.6	189.9	158.2	166.6
Casein kinase II subunit alpha' OS=Homo sapiens OX=9606 GN=CSNK2A2 PE=1 SV=1	CSNK2A2	424.9	683.8	514.6	693.9	611.4	632.1	826.2	805.7	726.6	765.4
RING-type E3 ubiquitin transferase RAD18 OS=Homo sapiens OX=9606 GN=RAD18 PE=1 SV=1	RAD18	39.5	52.8	45.5	60.8	55.9	61.7	63.8	66.7	61.9	59.7
Eukaryotic translation initiation factor 3 subunit J OS=Homo sapiens OX=9606 GN=EIF3J PE=1 SV=2	EIF3J	1726.2	2038.1	2016.3	2220.6	1739.1	2547	2519.7	2354.1	2541.1	2369.3
RNA cytosine C(5)-methyltransferase NSUN2 OS=Homo sapiens OX=9606 GN=NSUN2 PE=1 SV=2	NSUN2	1390.3	2225.6	1705.8	2119.1	1936.7	1858	2758.9	2736.9	2487.8	2507.7
Probable ATP-dependent RNA helicase DDX49 OS=Homo sapiens OX=9606 GN=DDX49 PE=1 SV=1	DDX49	8.5	12.2	9.9	13.8	17	12.8	14.7	18.9	14.6	16.8
Electron transfer flavoprotein subunit beta OS=Homo sapiens OX=9606 GN=ETFB PE=1 SV=3	ETFB	969.2	1087.1	1196.4	1109.9	1025.7	1426.9	1398.1	1370.1	1501.2	1302.9
Peptidyl-prolyl cis-trans isomerase B OS=Homo sapiens OX=9606 GN=PPIB PE=1 SV=2	PPIB	5028.9	6423.6	6181.4	6213.1	5502.4	7708.7	7605.1	7495.8	7705.8	7416.2
Hydrocephalus-inducing protein homolog OS=Homo sapiens OX=9606 GN=HYDIN PE=1 SV=3	HYDIN	58.1	46.7	23.4	95.4	73.5	85.5	78.1	68	50.7	25.4
DNA fragmentation factor subunit alpha OS=Homo sapiens OX=9606 GN=DFFA PE=1 SV=1	DFFA	1728	2083.9	1990.2	1985.6	1647.8	2539.9	2339.4	2323.9	2543.7	2448.4
Zinc finger MYM-type protein 3 OS=Homo sapiens OX=9606 GN=ZMYM3 PE=1 SV=2	ZMYM3	28	41.3	38	47.3	35	41.2	52.8	50.3	47.8	31.1
DDB1- and CUL4-associated factor 16 OS=Homo sapiens OX=9606 GN=DCAF16 PE=1 SV=1	DCAF16	36.5	44.5	49.1	39.5	37.2	53.7	53.2	54.9	57.9	58.6
Atlastin-2 OS=Homo sapiens OX=9606 GN=ATL2 PE=1 SV=2	ATL2	71.8	96.8	87.5	78.8	97.6	105.6	122.7	108	104	93.9
Probable 28S rRNA (cytosine(4447)-C(5))-methyltransferase OS=Homo sapiens OX=9606 GN=NOP2 PE=1 SV=2	NOP2	1066.3	1886.5	1352.2	1755.6	2071	1323.4	2654.8	2518.9	2052	2179.5
ATP-dependent Clp protease ATP-binding subunit clpX-like, mitochondrial OS=Homo sapiens OX=9606 GN=CLPX PE=1 SV=2	CLPX	2185.3	2823.8	2817.6	2832.6	2575.3	3490.8	3393	3308.8	3465.3	3233
Ras GTPase-activating protein-binding protein 1 OS=Homo sapiens OX=9606 GN=G3BP1 PE=1 SV=1	G3BP1	6442.5	7810.7	8685.6	7731	6161.2	9462.8	8834.3	9170.5	9806.5	9372
Beta-hexosaminidase subunit alpha OS=Homo sapiens OX=9606 GN=HEXA PE=1 SV=2	HEXA	361.1	449.4	410	469.6	395.3	543.9	510.2	514	527.4	530.9
3-hydroxybutyrate dehydrogenase type 2 OS=Homo sapiens OX=9606 GN=BDH2 PE=1 SV=2	BDH2	13.4	17.5	14.3	16.5	9.1	18.9	14	20	19.3	14.5
Tyrosyl-DNA phosphodiesterase 2 OS=Homo sapiens OX=9606 GN=TDP2 PE=1 SV=1	TDP2	154.4	217.4	158.5	205.8	157.6	237.5	210.5	244.6	213.3	211.6
39S ribosomal protein L49, mitochondrial OS=Homo sapiens OX=9606 GN=MRPL49 PE=1 SV=1	MRPL49	9.2	14.8	19.9	7.9	8.1	13.5	9.3	15.3	13.8	20.5
Rab-like protein 3 OS=Homo sapiens OX=9606 GN=RABL3 PE=1 SV=1	RABL3	19.3	21.6	25.7	24.1	20	30.2	21.7	28.4	28.9	26.8
Protein disulfide-isomerase A3 OS=Homo sapiens OX=9606 GN=PDIA3 PE=1 SV=4	PDIA3	9180.2	11992.5	13601	9934.5	9120.9	13455.8	11662.3	12733	14471.1	13781
PCI domain-containing protein 2 OS=Homo sapiens OX=9606 GN=PCID2 PE=1 SV=2	PCID2	95	126.8	112.4	141.4	121.6	130.9	159.1	163.2	164.9	143.5
cAMP-regulated phosphoprotein 19 OS=Homo sapiens OX=9606 GN=ARPP19 PE=1 SV=1	ARPP19	214.1	262.4	260.3	279.8	214.4	336.2	309.4	316.4	326.5	353.1
High mobility group protein B1 OS=Homo sapiens OX=9606 GN=HMGB1 PE=1 SV=3	HMGB1	7678.5	9091.3	7703.3	9533.1	8571.8	11133.7	13765.2	12390.8	10186.5	11482.3
Ubiquitin-conjugating enzyme E2 A OS=Homo sapiens OX=9606 GN=UBE2A PE=1 SV=2	UBE2A	19.2	31.3	38.7	23.4	21.3	28.9	25.1	23.3	33.2	28.5
TSC22 domain family protein 3 OS=Homo sapiens OX=9606 GN=TSC22D3 PE=1 SV=2	TSC22D3	176.8	243.8	221.8	224.6	166.4	282.7	225.1	257	261.7	253.9
Protein NDRG1 OS=Homo sapiens OX=9606 GN=NDRG1 PE=1 SV=1	NDRG1	151.5	161.7	185.4	143.8	142.5	204	219.4	184	233.8	190.5
Tyrosine-protein phosphatase non-receptor type 13 OS=Homo sapiens OX=9606 GN=PTPN13 PE=1 SV=2	PTPN13	65.1	98.9	76.8	95.3	76.7	95.6	97.4	95.8	96.2	102.5
Nestin OS=Homo sapiens OX=9606 GN=NES PE=1 SV=2	NES	93.8	107.1	107.6	119.2	103.4	139.3	129.4	133.5	132.1	126.5
NADH dehydrogenase [ubiquinone] 1 alpha subcomplex subunit 2 OS=Homo sapiens OX=9606 GN=NDUFA2 PE=1 SV=3	NDUFA2	164.7	279.3	402.5	188.7	195.8	240.4	191.4	244	320.9	373.5
Notchless protein homolog 1 OS=Homo sapiens OX=9606 GN=NLE1 PE=1 SV=4	NLE1	173	232.9	191.3	246.6	229.4	250.6	312	283.5	286.7	246.8
Core-binding factor subunit beta OS=Homo sapiens OX=9606 GN=CBFB PE=1 SV=1	CBFB	235.9	334.2	298.2	375.7	266.5	399.7	386.6	369.9	409.6	382.5
Exportin-4 OS=Homo sapiens OX=9606 GN=XPO4 PE=1 SV=2	XPO4	35.3	38.4	29.3	39.2	27.6	46.7	45.9	49	40.7	47.3
Four and a half LIM domains protein 3 OS=Homo sapiens OX=9606 GN=FHL3 PE=1 SV=4	FHL3	68.6	104.2	115.5	75.6	69.9	99.9	83	105.3	119.5	131.7
Cytochrome c oxidase assembly factor 7 OS=Homo sapiens OX=9606 GN=COA7 PE=1 SV=2	COA7	212.1	254.1	308.5	220.2	210.1	303.6	302.9	311.2	418.4	318.3
Ribosomal RNA-processing protein 7 homolog A OS=Homo sapiens OX=9606 GN=RRP7A PE=1 SV=2	RRP7A	78.8	129.9	110.1	115	146.3	108.9	156.7	168.1	133.3	153.6
Peptidyl-prolyl cis-trans isomerase-like 1 OS=Homo sapiens OX=9606 GN=PPIL1 PE=1 SV=1	PPIL1	913.2	1193.6	1064.4	1131.7	937.6	1249.4	1374.9	1344.2	1311.8	1256.1
Zinc finger CCCH domain-containing protein 18 OS=Homo sapiens OX=9606 GN=ZC3H18 PE=1 SV=2	ZC3H18	601.8	791.4	701.9	865.2	691.9	1044.3	942.2	915.3	951.3	900.8
Splicing factor 3B subunit 3 OS=Homo sapiens OX=9606 GN=SF3B3 PE=1 SV=4	SF3B3	7579.3	9730.4	8944.5	10692.7	8500.9	11795.8	11581.7	11634	11030.9	10539.7
Signal sequence receptor subunit alpha OS=Homo sapiens OX=9606 GN=SSR1 PE=1 SV=1	SSR1	79.4	138.4	125.3	98.5	121.1	115.4	154.7	144.6	142.1	169.1
EH domain-containing protein 4 OS=Homo sapiens OX=9606 GN=EHD4 PE=1 SV=1	EHD4	700	872.2	810.7	906.2	824.2	966	1132	1038.3	1047.8	1003.7
Pyruvate kinase PKM OS=Homo sapiens OX=9606 GN=PKM PE=1 SV=4	PKM	21167.7	25585.7	24231.4	27199	22519.8	29222.3	30632.6	30521.5	31222.4	29876.7
Iron-sulfur cluster assembly enzyme ISCU, mitochondrial OS=Homo sapiens OX=9606 GN=ISCU PE=1 SV=2	ISCU	80.6	112.6	101.5	109	97.7	146.4	119.8	129.3	125.9	129.2
Ribosomal RNA-processing protein 4 (Fragment) OS=Homo sapiens OX=9606 GN=EXOSC2 PE=1 SV=1	EXOSC2	26.8	32	28.3	40.6	31.7	38.9	46.5	50.7	43.7	39.9
Complex I-B22 OS=Homo sapiens OX=9606 GN=NDUFB9 PE=1 SV=1	NDUFB9	89	132.6	117.3	96.2	114.3	129.5	138.9	128.3	132.5	151.8
Sodium-dependent multivitamin transporter OS=Homo sapiens OX=9606 GN=SLC5A6 PE=2 SV=2	SLC5A6	89.1	121.6	127.5	109.1	109.2	129.1	146.6	107.6	139.4	127.9
Four and a half LIM domains protein 1 OS=Homo sapiens OX=9606 GN=FHL1 PE=1 SV=1	FHL1	326.1	348.8	319.5	402.1	461.5	252	521.1	445.1	463.8	362.6
Signal recognition particle 9 kDa protein OS=Homo sapiens OX=9606 GN=SRP9 PE=1 SV=2	SRP9	1893.4	2706.2	2743.3	2230.3	1988.7	2744.7	2703.2	2912.2	2941.7	2832.7
Proteasome assembly chaperone 4 OS=Homo sapiens OX=9606 GN=PSMG4 PE=1 SV=1	PSMG4	91.1	88.8	101	94.2	75.8	103.5	122.4	108.1	128.9	100.5
HAUS augmin-like complex subunit 4 (Fragment) OS=Homo sapiens OX=9606 GN=HAUS4 PE=1 SV=1	HAUS4	55.5	69.1	61.5	68.9	57.2	84.3	87.7	74.6	79.4	71.2
RNA polymerase II-associated factor 1 homolog OS=Homo sapiens OX=9606 GN=PAF1 PE=1 SV=2	PAF1	350.5	486.7	478.2	458.5	378.7	528.2	490	497.4	602.5	501.3
Tetraspanin-6 OS=Homo sapiens OX=9606 GN=TSPAN6 PE=1 SV=1	TSPAN6	184.2	241.3	224.3	229.5	201.9	266	277.1	275.9	309.6	274.3
Small nuclear ribonucleoprotein G OS=Homo sapiens OX=9606 GN=SNRPG PE=1 SV=1	SNRPG	28.6	44.7	56.5	30.5	28.2	41.4	41.5	54.4	57.3	61.5
GPI-anchor transamidase OS=Homo sapiens OX=9606 GN=PIGK PE=1 SV=2	PIGK	32.5	44.6	34.9	43.4	37.5	47	41.6	55.6	50.1	46.3
E3 SUMO-protein ligase PIAS1 OS=Homo sapiens OX=9606 GN=PIAS1 PE=1 SV=2	PIAS1	80.3	116.1	85.4	117.5	93.7	116.8	126	139.5	135.3	110.9
Nucleolar pre-ribosomal-associated protein 1 OS=Homo sapiens OX=9606 GN=URB1 PE=1 SV=4	URB1	54.2	87.3	74.4	97.1	88.2	88.9	103.3	104.8	92	96.7
28S ribosomal protein S22, mitochondrial OS=Homo sapiens OX=9606 GN=MRPS22 PE=1 SV=1	MRPS22	431.8	724.6	605.9	618.2	626.8	687.4	750.4	743.9	765.7	727.6
ATP-dependent DNA/RNA helicase DHX36 OS=Homo sapiens OX=9606 GN=DHX36 PE=1 SV=2	DHX36	19.7	40.6	26.9	31.2	35.5	32.2	38.3	33.2	35.9	35.8
Glycogen [starch] synthase, muscle OS=Homo sapiens OX=9606 GN=GYS1 PE=1 SV=2	GYS1	200.8	257.3	217.2	304.9	228.7	289.9	314.7	306.9	284.2	274.5
Heat shock protein 105 kDa OS=Homo sapiens OX=9606 GN=HSPH1 PE=1 SV=1	HSPH1	6600.5	7866.3	7497.4	8405	6589.5	9655.2	9510.9	8746.3	9231.9	8700.5
Mitotic checkpoint serine/threonine-protein kinase BUB1 beta OS=Homo sapiens OX=9606 GN=BUB1B PE=1 SV=3	BUB1B	363.3	459.4	419.9	495.6	364.2	545.4	513.6	514.9	515.9	501
2-aminoethanethiol dioxygenase OS=Homo sapiens OX=9606 GN=ADO PE=1 SV=2	ADO	116.2	154.6	136.7	163.1	115.5	167.7	168.3	171.4	153.8	157.2
39S ribosomal protein L48, mitochondrial OS=Homo sapiens OX=9606 GN=MRPL48 PE=1 SV=2	MRPL48	257.8	439.1	335.5	410.3	439.7	379.5	519.1	506.2	447.1	482.8
Guanidinoacetate N-methyltransferase OS=Homo sapiens OX=9606 GN=GAMT PE=1 SV=1	GAMT	70.3	80	76.5	65.2	60.9	98.4	90.1	93.7	94.3	95
DnaJ homolog subfamily A member 3, mitochondrial OS=Homo sapiens OX=9606 GN=DNAJA3 PE=1 SV=2	DNAJA3	73.7	134.8	96.4	132.4	120.3	120	159.2	154.3	127.1	124.7
Succinate dehydrogenase [ubiquinone] iron-sulfur subunit, mitochondrial OS=Homo sapiens OX=9606 GN=SDHB PE=1 SV=3	SDHB	1124.4	1651.4	1691.9	1208.3	1302.3	1622	1631.8	1645.5	1763.3	1739.2
Legumain OS=Homo sapiens OX=9606 GN=LGMN PE=1 SV=1	LGMN	226.6	275.8	251	294	266.3	313.8	339.7	332.7	337.7	324.4
tRNA-dihydrouridine(47) synthase [NAD(P)(+)]-like OS=Homo sapiens OX=9606 GN=DUS3L PE=1 SV=2	DUS3L	81.9	115.4	88	112	93	113.6	136	125.2	122.8	125.5
DNA-directed RNA polymerase I subunit RPA2 OS=Homo sapiens OX=9606 GN=POLR1B PE=1 SV=2	POLR1B	56.3	68.1	63	74.6	69.3	75.6	86	85.7	85.5	71.4
Centrin-3 OS=Homo sapiens OX=9606 GN=CETN3 PE=1 SV=2	CETN3	24	51.7	33.5	35.1	28.1	41.9	35.6	41	36.1	37.2
Histone H1.4 OS=Homo sapiens OX=9606 GN=H1-4 PE=1 SV=2	H1-4	2208.3	3188.4	1795.2	5227.4	1685.2	3882.9	2493.7	4031.6	3602.8	2218.1
TBC1 domain family member 4 OS=Homo sapiens OX=9606 GN=TBC1D4 PE=1 SV=2	TBC1D4	373.9	520.7	416.1	550.5	409.5	545.8	540	554.4	523	539
Probable rRNA-processing protein EBP2 OS=Homo sapiens OX=9606 GN=EBNA1BP2 PE=1 SV=2	EBNA1BP2	429.3	702	486.7	680.2	672.3	617.8	931.3	874.3	738	812
Utp12 domain-containing protein (Fragment) OS=Homo sapiens OX=9606 PE=4 SV=2	4	1591.5	2144	2286.2	1724	1580.8	2289	1973.5	2200.1	2278.1	2211.9
Protein unc-45 homolog A OS=Homo sapiens OX=9606 GN=UNC45A PE=1 SV=1	UNC45A	1798.3	2176.6	1997.6	2439.7	1876.6	2571.1	2593	2501.9	2517.6	2468.7
Tripeptidyl-peptidase 2 (Fragment) OS=Homo sapiens OX=9606 GN=TPP2 PE=1 SV=1	TPP2	233.4	296.1	242	295	243.2	335.8	331.9	326	330.5	340.9
Estradiol 17-beta-dehydrogenase 11 OS=Homo sapiens OX=9606 GN=HSD17B11 PE=1 SV=3	HSD17B11	82.1	124.8	122.4	108.7	127.5	125.5	146.9	145.6	154.5	145.5
Peptidylprolyl isomerase domain and WD repeat-containing protein 1 OS=Homo sapiens OX=9606 GN=PPWD1 PE=1 SV=1	PPWD1	160.9	202.8	189.8	242.4	206.1	231.5	241.9	254.5	235.6	217.3
Enhancer of mRNA-decapping protein 3 OS=Homo sapiens OX=9606 GN=EDC3 PE=1 SV=1	EDC3	410.5	568.9	476.8	543.8	433.3	541.9	642.6	582.3	621.9	598.6
Methionine adenosyltransferase 2 subunit beta OS=Homo sapiens OX=9606 GN=MAT2B PE=1 SV=1	MAT2B	388	532.3	508.6	443.4	382.1	557.7	569.7	564.8	593.3	539.3
Small EDRK-rich factor 2 OS=Homo sapiens OX=9606 GN=SERF2 PE=1 SV=1	SERF2	66.2	79.5	71.9	72.3	64.5	88.9	98.2	80	93.8	84.8
Alpha-enolase OS=Homo sapiens OX=9606 GN=ENO1 PE=1 SV=2	ENO1	64334.9	72697.2	82203.4	54265.2	50418.8	89763	85479	85076.8	89778.5	84836
Glycine dehydrogenase (decarboxylating), mitochondrial OS=Homo sapiens OX=9606 GN=GLDC PE=1 SV=2	GLDC	18.2	22.5	20	23.9	20.9	26.6	24	24.4	25.9	29.1
RNA polymerase-associated protein CTR9 homolog OS=Homo sapiens OX=9606 GN=CTR9 PE=1 SV=1	CTR9	26.1	40.5	33.2	44.3	40.3	37.5	51.1	56	39.5	39.9
Replication protein A 14 kDa subunit OS=Homo sapiens OX=9606 GN=RPA3 PE=1 SV=1	RPA3	841.4	1096.1	1205.3	919.9	774.4	1208.3	1046.5	1184.6	1255.7	1293.8
Probable E3 ubiquitin-protein ligase makorin-2 OS=Homo sapiens OX=9606 GN=MKRN2 PE=1 SV=2	MKRN2	137.6	218.6	154.4	227.2	213.2	197.8	281.8	273.2	235.2	259.2
DNA-(apurinic or apyrimidinic site) endonuclease OS=Homo sapiens OX=9606 GN=APEX1 PE=1 SV=2	APEX1	3670.7	4620.7	4053.8	4982.6	4416.3	4899.2	6436.7	6175.2	5697.5	5718.6
GDP-fucose protein O-fucosyltransferase 1 OS=Homo sapiens OX=9606 GN=POFUT1 PE=1 SV=1	POFUT1	8.6	14.3	12.8	13.5	15.9	13.5	16.8	17.6	15.3	16
O-phosphoserine phosphohydrolase (Fragment) OS=Homo sapiens OX=9606 GN=PSPH PE=1 SV=1	PSPH	33.3	41	40.8	42.3	40.6	47.4	52.7	50.9	46	53.3
Aminopeptidase B OS=Homo sapiens OX=9606 GN=RNPEP PE=1 SV=2	RNPEP	2118.8	2398.1	2314.4	2717.7	2177.3	2817.1	2932.5	2821.9	2754.2	2866.9
Protein SET OS=Homo sapiens OX=9606 GN=SET PE=1 SV=3	SET	2880.6	4056.3	3638.3	3464.5	2754.6	4133.8	3778	4081.1	4459.2	4167.5
28S ribosomal protein S35, mitochondrial OS=Homo sapiens OX=9606 GN=MRPS35 PE=1 SV=1	MRPS35	333.3	478.6	430.3	462.5	417.6	501.8	562	495.6	542.8	452.6
Hsp90 co-chaperone Cdc37 OS=Homo sapiens OX=9606 GN=CDC37 PE=1 SV=1	CDC37	3163.7	3869.2	3606.8	4275.4	3200.5	4642.3	4541.6	4274.9	4623.6	4235.7
G patch domain-containing protein 8 OS=Homo sapiens OX=9606 GN=GPATCH8 PE=1 SV=2	GPATCH8	248.8	362.4	312.8	424.5	329.4	387.3	389.6	411.1	398.7	431.4
Ganglioside GM2 activator OS=Homo sapiens OX=9606 GN=GM2A PE=1 SV=4	GM2A	131.7	192.8	237.3	139.4	127.9	188.6	147	179	213.2	210.4
HCLS1-binding protein 3 OS=Homo sapiens OX=9606 GN=HS1BP3 PE=1 SV=1	HS1BP3	47	57.7	54.8	60.2	51.7	67.3	68.5	61.2	72.8	66.4
Charged multivesicular body protein 1a OS=Homo sapiens OX=9606 GN=CHMP1A PE=1 SV=1	CHMP1A	943.5	1218.6	1121.5	1178.7	863.6	1444.1	1319.9	1259.4	1343.5	1232.9
Dihydrolipoyllysine-residue succinyltransferase component of 2-oxoglutarate dehydrogenase complex, mitochondrial OS=Homo sapiens OX=9606 GN=DLST PE=1 SV=4	DLST	1353.5	1859.3	1733.5	1791.2	1627.5	2283.1	2166.4	2103.4	2180.2	2130.8
60S ribosomal protein L10 OS=Homo sapiens OX=9606 GN=RPL10 PE=1 SV=2	RPL10	71.7	167.5	96	141.2	130.4	101.7	207.2	188.3	160.9	121.6
Polyamine-modulated factor 1 OS=Homo sapiens OX=9606 GN=PMF1 PE=1 SV=2	PMF1	65.9	76.3	80.1	76.6	62.7	92	94.9	90.1	91.5	82
Translation initiation factor eIF-2B subunit epsilon (Fragment) OS=Homo sapiens OX=9606 GN=EIF2B5 PE=1 SV=1	EIF2B5	75.3	99.9	98.3	110.9	102.2	107.2	117	125.6	143.4	129.1
Prostaglandin E synthase 2 OS=Homo sapiens OX=9606 GN=PTGES2 PE=1 SV=1	PTGES2	166	200.9	195.2	201.2	189	226.1	253.2	237.1	252	221.9
Serine hydroxymethyltransferase, cytosolic OS=Homo sapiens OX=9606 GN=SHMT1 PE=1 SV=1	SHMT1	867.6	1064.4	1043.4	1252.5	970.4	1218.6	1386.1	1390.9	1425.8	1248.3
FAST kinase domain-containing protein 4 OS=Homo sapiens OX=9606 GN=TBRG4 PE=1 SV=1	TBRG4	1147.2	1714.2	1422.2	1435.7	1618.8	1704.5	1813.9	1947.7	1634.6	1713.4
Sorting nexin-1 OS=Homo sapiens OX=9606 GN=SNX1 PE=1 SV=3	SNX1	565.7	567.5	621	671.4	546.9	807.8	769.8	719.7	726.5	801.7
5'-AMP-activated protein kinase subunit gamma-1 OS=Homo sapiens OX=9606 GN=PRKAG1 PE=1 SV=1	PRKAG1	276.1	346.8	316.2	355.2	302.5	323.3	434.9	409.8	404	393.8
NADH dehydrogenase [ubiquinone] 1 alpha subcomplex subunit 9, mitochondrial OS=Homo sapiens OX=9606 GN=NDUFA9 PE=1 SV=2	NDUFA9	310.8	468.7	398.1	403.4	497.8	400.6	548.1	513.5	495.8	464.7
Pentatricopeptide repeat domain-containing protein 3, mitochondrial OS=Homo sapiens OX=9606 GN=PTCD3 PE=1 SV=3	PTCD3	161.4	217.1	197.6	225.6	206.2	250.3	253.6	262.9	218.6	250.2
Pachytene checkpoint protein 2 homolog OS=Homo sapiens OX=9606 GN=TRIP13 PE=1 SV=2	TRIP13	1767.6	2312.8	1986.8	2440.6	1946.2	2521.5	2807.1	2632.2	2618.3	2427.9
Fanconi anemia group I protein OS=Homo sapiens OX=9606 GN=FANCI PE=1 SV=4	FANCI	662.2	865.6	755.6	958.7	839.1	944.5	1130.9	1082.1	1029.3	1024.2
Complex I-B9 OS=Homo sapiens OX=9606 GN=NDUFA3 PE=1 SV=1	NDUFA3	37.9	70.8	56.5	64.5	52.4	67.9	70.9	59.2	82.8	68.4
EF-hand calcium-binding domain-containing protein 3 OS=Homo sapiens OX=9606 GN=EFCAB3 PE=1 SV=1	EFCAB3	72.5	87.7	85.4	99.3	75.4	91.2	102.3	107.5	95.7	103.8
Vacuolar protein sorting-associated protein 35 OS=Homo sapiens OX=9606 GN=VPS35 PE=1 SV=2	VPS35	1736.7	2288.1	2033.1	2435.8	2018.9	2473.9	2825.3	2768.4	2688.3	2524.2
Queuine tRNA-ribosyltransferase accessory subunit 2 OS=Homo sapiens OX=9606 GN=QTRT2 PE=1 SV=1	QTRT2	55.2	75.3	65.2	82.9	61.2	82.5	86.3	83	78.7	79.8
H/ACA ribonucleoprotein complex non-core subunit NAF1 OS=Homo sapiens OX=9606 GN=NAF1 PE=1 SV=2	NAF1	502.7	645.1	569.3	673.1	478.9	740.3	682.1	689.4	673.6	662.5
39S ribosomal protein L53, mitochondrial OS=Homo sapiens OX=9606 GN=MRPL53 PE=1 SV=1	MRPL53	221.3	280	329.2	249.4	227.8	315.2	291.5	299.7	307.8	312.7
Trafficking protein particle complex subunit 2-like protein OS=Homo sapiens OX=9606 GN=TRAPPC2L PE=1 SV=1	TRAPPC2L	58.8	68.6	58.6	75	61.5	84.1	75	79.8	85.1	78.1
ATP-dependent RNA helicase DHX30 OS=Homo sapiens OX=9606 GN=DHX30 PE=1 SV=1	DHX30	721.4	1291.7	900	1123	1238.8	994.1	1525.8	1566.1	1273	1426.2
Lamina-associated polypeptide 2, isoforms beta/gamma OS=Homo sapiens OX=9606 GN=TMPO PE=1 SV=1	TMPO	249	343.9	324.5	246.8	357.4	286.6	438.9	392.5	363.9	400.1
Putative deoxyribonuclease TATDN1 OS=Homo sapiens OX=9606 GN=TATDN1 PE=1 SV=2	TATDN1	800	977.4	938.4	881.1	750.1	1098.3	1138	1043.8	1156.7	1054.6
Cytosolic malate dehydrogenase (Fragment) OS=Homo sapiens OX=9606 GN=MDH1 PE=1 SV=8	MDH1	702.9	1023.6	817.3	1079	750.7	1024.7	1019.8	1040.3	979.6	978
rRNA methyltransferase 3, mitochondrial OS=Homo sapiens OX=9606 GN=MRM3 PE=1 SV=2	MRM3	66.8	83.7	82.4	74.9	70.3	82.3	97.5	99.5	100.2	94.3
Hepatoma-derived growth factor-related protein 3 OS=Homo sapiens OX=9606 GN=HDGFL3 PE=1 SV=1	HDGFL3	42.3	49.7	45.4	50.3	45.2	47.1	60.9	54.8	57	60.3
RNA-binding motif, single-stranded-interacting protein 1 OS=Homo sapiens OX=9606 GN=RBMS1 PE=1 SV=1	RBMS1	121.8	199.9	223.1	159.3	126.3	173.3	140.2	165.7	199.8	226.8
Glycerol-3-phosphate phosphatase OS=Homo sapiens OX=9606 GN=PGP PE=1 SV=1	PGP	1163.2	1345	1366.9	1355.3	1094.2	1634.2	1564.6	1524.1	1599.7	1492.1
AP-2 complex subunit alpha-1 OS=Homo sapiens OX=9606 GN=AP2A1 PE=1 SV=3	AP2A1	730.7	957.3	886.8	1049	886.2	1042.8	1113.3	1108.3	1080.8	1067.9
Small ubiquitin-related modifier 2 OS=Homo sapiens OX=9606 GN=SUMO2 PE=1 SV=3	SUMO2	2018.5	2942.8	2322.2	2953.1	1932.3	3132.2	2535.6	2874.4	2507.4	2512.2
U3 small nucleolar RNA-associated protein 4 homolog OS=Homo sapiens OX=9606 GN=UTP4 PE=1 SV=1	UTP4	414.4	617.1	504.9	616.3	623	554.3	842	784.7	697.1	656.5
Striatin-3 OS=Homo sapiens OX=9606 GN=STRN3 PE=1 SV=3	STRN3	389.3	392.4	414.7	394.2	380.6	473.3	510.1	447	532.8	495
Protein enabled homolog OS=Homo sapiens OX=9606 GN=ENAH PE=1 SV=1	ENAH	2596.8	3077	2991.3	3040.6	2404.2	3688.3	3399.2	3289.8	3535.7	3432.1
Protein FAM98B OS=Homo sapiens OX=9606 GN=FAM98B PE=1 SV=2	FAM98B	549.9	706.4	673.3	735.4	616.3	810.7	849.6	812	789.5	722.4
28S ribosomal protein S5, mitochondrial OS=Homo sapiens OX=9606 GN=MRPS5 PE=1 SV=2	MRPS5	473.9	880.1	634.5	764.4	867	616	1030	963.6	863.8	839.2
Elongator complex protein 3 OS=Homo sapiens OX=9606 GN=ELP3 PE=1 SV=1	ELP3	9.3	20.4	9.8	16.8	11.3	13.2	14.5	12.9	16.7	15.1
Beta-2-microglobulin (Fragment) OS=Homo sapiens OX=9606 GN=B2M PE=1 SV=1	B2M	573.2	875.7	1053.4	613.9	613.6	814.2	668.1	839.4	971.9	1070
Dolichyl-diphosphooligosaccharide--protein glycosyltransferase subunit DAD1 OS=Homo sapiens OX=9606 GN=DAD1 PE=1 SV=1	DAD1	55.3	121.1	75.7	75.9	85.6	80.4	102.3	91.3	98	105.5
Pre-mRNA-processing factor 6 OS=Homo sapiens OX=9606 GN=PRPF6 PE=1 SV=1	PRPF6	986.4	1352.9	1211.3	1304.1	1314.6	1203.7	1581.7	1503.7	1471.9	1493.5
Telomerase RNA component interacting RNase OS=Homo sapiens OX=9606 GN=TRIR PE=1 SV=1	TRIR	928.7	1208.7	1039.1	1275.6	887.6	1378.1	1240.2	1251.3	1240.7	1276.1
Small ubiquitin-related modifier 3 OS=Homo sapiens OX=9606 GN=SUMO3 PE=1 SV=1	SUMO3	1045.8	1485.4	1212.9	1416.7	1020.4	1621.2	1490.2	1484.4	1431.1	1323.6
Mitochondrial import inner membrane translocase subunit Tim17-A OS=Homo sapiens OX=9606 GN=TIMM17A PE=1 SV=1	TIMM17A	30.1	31.3	40.6	36.9	40.4	40.5	51.1	48.9	50.7	50.4
ATP-binding cassette sub-family B member 7, mitochondrial OS=Homo sapiens OX=9606 GN=ABCB7 PE=1 SV=1	ABCB7	53.3	81.4	67.9	63.7	69.4	59.9	94.5	82.1	80.8	80
Ubiquitin-conjugating enzyme E2 G1 OS=Homo sapiens OX=9606 GN=UBE2G1 PE=1 SV=3	UBE2G1	83.4	72.1	103.1	83.7	72.3	118.2	122.9	109.2	123	86.5
Kynurenine--oxoglutarate transaminase 3 OS=Homo sapiens OX=9606 GN=KYAT3 PE=1 SV=1	KYAT3	263.5	343.7	298.1	354.3	332	324.7	405.6	374.2	399.5	347
Purine nucleoside phosphorylase OS=Homo sapiens OX=9606 GN=PNP PE=1 SV=2	PNP	2573.3	3002.6	2930.3	3037.5	2729.8	3372.8	3722.4	3526.5	3642.4	3278.1
Spastin OS=Homo sapiens OX=9606 GN=SPAST PE=1 SV=1	SPAST	8.9	11.6	11.1	14.5	8.8	12.6	15.8	14.1	13.9	11
Nuclear transcription factor Y subunit beta OS=Homo sapiens OX=9606 GN=NFYB PE=1 SV=2	NFYB	10.1	16.2	14.7	20.3	15.9	21.5	15.5	19.9	20.5	20.6
Poly(A) RNA polymerase, mitochondrial OS=Homo sapiens OX=9606 GN=MTPAP PE=1 SV=1	MTPAP	76.7	116.8	98.5	105.9	114.7	106.2	135.2	140	136.3	128.8
Sorting nexin-6 OS=Homo sapiens OX=9606 GN=SNX6 PE=1 SV=1	SNX6	1756.9	2122.5	1939.7	2322.2	1769.4	2430.1	2457.4	2332.9	2406.2	2301.8
Ubiquitin-conjugating enzyme E2 G2 OS=Homo sapiens OX=9606 GN=UBE2G2 PE=1 SV=1	UBE2G2	48.3	66	58.8	63.5	55.3	71.4	69.5	69.3	72.3	71.5
Adenosine deaminase OS=Homo sapiens OX=9606 GN=ADA PE=1 SV=1	ADA	45.7	47.3	59.6	37.9	38.9	61.4	54.8	52	62.4	50.3
Vacuolar protein-sorting-associated protein 36 OS=Homo sapiens OX=9606 GN=VPS36 PE=1 SV=1	VPS36	83.1	90.1	97.1	108.5	81	124.5	107.1	109.6	110.6	104.7
Eukaryotic translation initiation factor 1 OS=Homo sapiens OX=9606 GN=EIF1 PE=1 SV=1	EIF1	1091.8	1661.7	1580.4	1427.4	1002.3	1541.9	1389.9	1411	1696.5	1462.3
Histone-binding protein RBBP4 OS=Homo sapiens OX=9606 GN=RBBP4 PE=1 SV=3	RBBP4	1986.4	2524.1	2390.7	2416.7	1952.4	2816.8	2570.5	2582.3	2765	2521.9
Isocitrate dehydrogenase [NAD] subunit gamma, mitochondrial OS=Homo sapiens OX=9606 GN=IDH3G PE=1 SV=1	IDH3G	40.5	66.3	50.1	62.5	56.2	63.3	62.2	64.3	70.2	62.3
Pyridoxal phosphate phosphatase OS=Homo sapiens OX=9606 GN=PDXP PE=1 SV=2	PDXP	156.7	201.7	191	187	153.8	221.1	221.9	206.1	215.4	222.5
40S ribosomal protein S17 OS=Homo sapiens OX=9606 PE=3 SV=2	3	1917.3	2141.4	2540.4	2268.5	2279.3	2143.8	2859.3	2932.6	2704.7	2941.4
UPF0488 protein C8orf33 OS=Homo sapiens OX=9606 GN=C8orf33 PE=1 SV=1	C8orf33	217.3	368.6	241.3	371.5	307	306.8	418.5	433.1	320.1	404
Ribosomal RNA small subunit methyltransferase NEP1 OS=Homo sapiens OX=9606 GN=EMG1 PE=1 SV=4	EMG1	376.6	574.4	472.1	572.5	521.4	531.5	665.2	679.7	565.3	620
Translin-associated protein X OS=Homo sapiens OX=9606 GN=TSNAX PE=1 SV=1	TSNAX	449.1	593.3	506	670.5	505.6	633.8	674.1	683.5	626.6	652.1
2',5'-phosphodiesterase 12 OS=Homo sapiens OX=9606 GN=PDE12 PE=1 SV=1	PDE12	27.9	31.8	31.4	36.3	29.2	33.4	36.7	42.4	41.9	33.7
Macrophage migration inhibitory factor OS=Homo sapiens OX=9606 GN=MIF PE=1 SV=4	MIF	623.9	610.9	812.6	461.4	410.3	691.5	705.3	823.3	1011.5	1004.2
COP9 signalosome complex subunit 7a (Fragment) OS=Homo sapiens OX=9606 GN=COPS7A PE=1 SV=8	COPS7A	231.7	287.1	248.3	303.5	256.4	311.8	376.2	348.8	339.5	330.7
Spermatogenesis-associated protein 5-like protein 1 OS=Homo sapiens OX=9606 GN=SPATA5L1 PE=1 SV=2	SPATA5L1	21.1	29.2	29.2	35.2	23.7	35.3	33.7	29.4	33.9	31.4
Survival motor neuron protein OS=Homo sapiens OX=9606 GN=SMN1 PE=1 SV=1	SMN1	438.4	660	554.8	651.9	472.2	665.3	633	664.3	629.2	624.9
Mediator of RNA polymerase II transcription subunit 4 OS=Homo sapiens OX=9606 GN=MED4 PE=1 SV=1	MED4	194.5	235.3	229.1	210.9	166.6	274	244	254.8	261.8	277.6
DNA replication licensing factor MCM6 OS=Homo sapiens OX=9606 GN=MCM6 PE=1 SV=1	MCM6	6437.3	7604.6	7244.8	8354.8	6576	9079.9	9379.5	8661.8	8981.7	8248
Microtubule-associated proteins 1A/1B light chain 3B OS=Homo sapiens OX=9606 GN=MAP1LC3B PE=1 SV=3	MAP1LC3B	95.2	115.3	112.1	104.9	86.7	126.7	135.4	125.2	118.1	111.7
DNA replication complex GINS protein SLD5 OS=Homo sapiens OX=9606 GN=GINS4 PE=1 SV=1	GINS4	271.8	341.4	330.7	321.8	281.7	382.4	393.3	386.9	411.8	373.4
Lysine-specific demethylase RSBN1L OS=Homo sapiens OX=9606 GN=RSBN1L PE=1 SV=2	RSBN1L	48.7	60.3	54.9	60.8	63.5	51.7	71.1	71.9	68.1	71.8
Nucleophosmin OS=Homo sapiens OX=9606 GN=NPM1 PE=1 SV=2	NPM1	25788.7	34411.6	40847	29102.3	26719.7	36263.9	30167	34111.9	38408.1	36382.6
Cytoplasmic dynein 1 light intermediate chain 2 OS=Homo sapiens OX=9606 GN=DYNC1LI2 PE=1 SV=1	DYNC1LI2	460.1	662.7	507.9	666.1	480.1	671	591.7	656.8	590.2	617.6
AIR carboxylase (Fragment) OS=Homo sapiens OX=9606 GN=PAICS PE=1 SV=1	PAICS	8944.7	11093.1	10243.1	12092.6	8756.9	13296.4	12548.7	12217.9	12278.3	11457.9
Coordinator of PRMT5 and differentiation stimulator OS=Homo sapiens OX=9606 GN=COPRS PE=1 SV=3	COPRS	111.6	159.8	140.6	162.2	98.4	156.7	154.8	138.1	184.1	137.8
Interferon regulatory factor 2-binding protein 2 OS=Homo sapiens OX=9606 GN=IRF2BP2 PE=1 SV=2	IRF2BP2	1342.4	1630.9	1630	1771.4	1380.3	1886.7	1844.5	1765.9	1986	1785.9
NADH dehydrogenase [ubiquinone] iron-sulfur protein 4, mitochondrial OS=Homo sapiens OX=9606 GN=NDUFS4 PE=1 SV=1	NDUFS4	249.2	451.2	494.9	303.3	279.3	350.1	321.8	359.8	466.6	490
Phenylalanine--tRNA ligase beta subunit OS=Homo sapiens OX=9606 GN=FARSB PE=1 SV=3	FARSB	4167.9	5418.6	4532.5	5605.5	4620.1	5857.2	6745.9	6407.3	6098.1	5814.7
S-phase kinase-associated protein 2 (Fragment) OS=Homo sapiens OX=9606 GN=SKP2 PE=1 SV=1	SKP2	129.8	135.8	134.5	146.7	129.1	164.2	181.1	172.7	164.1	165.4
tRNA (guanine(37)-N1)-methyltransferase OS=Homo sapiens OX=9606 GN=TRMT5 PE=1 SV=2	TRMT5	20.6	26.9	23.8	30.5	22.9	29.1	30.2	28.7	33.8	29.4
Torsin-1A-interacting protein 1 OS=Homo sapiens OX=9606 GN=TOR1AIP1 PE=1 SV=1	TOR1AIP1	35.2	54.9	44.8	41.2	56.1	47.2	64.7	53.4	53.4	54.8
Tetratricopeptide repeat protein 4 OS=Homo sapiens OX=9606 GN=TTC4 PE=1 SV=3	TTC4	866.2	1329.3	1001.7	1261.8	1030	1394.7	1509.3	1451.4	1362.8	1322.4
39S ribosomal protein L4, mitochondrial OS=Homo sapiens OX=9606 GN=MRPL4 PE=1 SV=1	MRPL4	58	72.3	68.6	73.3	64.9	73.5	83	82.9	82.6	78.4
TP53-binding protein 1 OS=Homo sapiens OX=9606 GN=TP53BP1 PE=1 SV=2	TP53BP1	1329.3	1860.8	1624.5	1974.6	1515.4	2159.2	2002.7	1999.6	2067	1945.3
Transcriptional repressor CTCF OS=Homo sapiens OX=9606 GN=CTCF PE=1 SV=1	CTCF	435.6	636.2	470.5	662.4	549.1	611.3	744.3	648.5	638.4	647
Mitochondrial import inner membrane translocase subunit Tim9 OS=Homo sapiens OX=9606 GN=TIMM9 PE=1 SV=1	TIMM9	284.8	434.7	508.7	290.8	293.9	399.1	313.2	399	462.5	449.2
Adenosylhomocysteinase OS=Homo sapiens OX=9606 GN=AHCY PE=1 SV=4	AHCY	8840.4	11157.1	9824	11991.8	9233.8	12385.3	12703.3	12321.9	12000.9	11894.3
Mortality factor 4-like protein 1 (Fragment) OS=Homo sapiens OX=9606 GN=MORF4L1 PE=1 SV=1	MORF4L1	89.2	142.2	114.8	160.2	129.5	125	182.5	167.2	153.2	151.5
Cyclin-dependent kinase inhibitor 2A OS=Homo sapiens OX=9606 GN=CDKN2A PE=1 SV=2	CDKN2A	621.2	890.6	1019.3	750.3	552	870.6	760.3	864.3	1040.2	1132.4
Putative E3 ubiquitin-protein ligase UBR7 OS=Homo sapiens OX=9606 GN=UBR7 PE=1 SV=2	UBR7	129	154.3	152.5	168.8	130.6	173.3	184.8	177.7	196.6	167.3
U5 small nuclear ribonucleoprotein 40 kDa protein OS=Homo sapiens OX=9606 GN=SNRNP40 PE=1 SV=1	SNRNP40	1463.3	2055.8	1877.9	2165.2	1800.3	2308.6	2367.6	2180.7	2414	2187
SAGA-associated factor 29 OS=Homo sapiens OX=9606 GN=SGF29 PE=1 SV=1	SGF29	33.8	62.2	49.3	56.4	42.1	56.3	61.7	58.6	73	52.9
RNA-splicing ligase RtcB homolog OS=Homo sapiens OX=9606 GN=RTCB PE=1 SV=1	RTCB	5226.3	6704	6316.6	6099.4	5112.6	7339.3	7404.2	6978	7210.6	6546.3
5'(3')-deoxyribonucleotidase, cytosolic type OS=Homo sapiens OX=9606 GN=NT5C PE=1 SV=2	NT5C	372.6	432.9	445.9	389.1	331.7	491.7	492.1	530.5	563.7	535.6
TELO2-interacting protein 2 OS=Homo sapiens OX=9606 GN=TTI2 PE=1 SV=1	TTI2	63.4	87.9	75.9	99.2	79.7	88.7	104.4	105	85.8	96.7
Syntaxin-binding protein 2 (Fragment) OS=Homo sapiens OX=9606 GN=STXBP2 PE=1 SV=8	STXBP2	15	20.9	19.7	22.6	15	21.1	22.5	23.4	21.3	20
Laminin subunit beta-1 OS=Homo sapiens OX=9606 GN=LAMB1 PE=1 SV=2	LAMB1	133.3	169.2	155.7	168.7	146.6	194.1	174.3	184.9	193.9	164.7
Creatine kinase B-type OS=Homo sapiens OX=9606 GN=CKB PE=1 SV=1	CKB	19362.6	25773.4	23077.8	25047.1	20334.5	26825.7	29474.1	28565.1	28838.6	25906.5
39S ribosomal protein L9, mitochondrial OS=Homo sapiens OX=9606 GN=MRPL9 PE=1 SV=2	MRPL9	88.7	140.7	120.5	116.4	143.7	109.7	160.9	154	141.5	147.1
Heat shock 70 kDa protein 1-like OS=Homo sapiens OX=9606 GN=HSPA1L PE=1 SV=2	HSPA1L	404.2	39	240.5	157.2	268.2	223.6	497.7	285.4	484.4	293.2
Bifunctional purine biosynthesis protein ATIC OS=Homo sapiens OX=9606 GN=ATIC PE=1 SV=3	ATIC	6425.2	8074.1	7469.8	8533	6599.7	8945.7	9234.1	8983.5	9356.4	8900.1
Zinc finger CCCH domain-containing protein 7A OS=Homo sapiens OX=9606 GN=ZC3H7A PE=1 SV=1	ZC3H7A	20.7	30	22.5	32.9	26.7	28.9	36.9	31.6	26.4	29.9
Quinone oxidoreductase-like protein 1 (Fragment) OS=Homo sapiens OX=9606 GN=CRYZL1 PE=1 SV=1	CRYZL1	11.4	10.6	13.5	14.3	10.3	13.7	16.1	12.7	15.9	13.9
Seryl-tRNA synthetase OS=Homo sapiens OX=9606 GN=SARS2 PE=1 SV=1	SARS2	106.7	144.9	132.6	146.4	129.1	152.3	164.7	166.3	162.8	152.4
Proteasome assembly chaperone 3 OS=Homo sapiens OX=9606 GN=PSMG3 PE=1 SV=1	PSMG3	162.3	187.7	195.2	226.9	163.3	246.1	214.3	224	227.3	216.4
39S ribosomal protein L1, mitochondrial OS=Homo sapiens OX=9606 GN=MRPL1 PE=1 SV=2	MRPL1	34.2	64.1	48	58.1	53.8	52.9	67.3	60.3	64.5	67.4
Zinc finger and BTB domain-containing protein 40 (Fragment) OS=Homo sapiens OX=9606 GN=ZBTB40 PE=1 SV=1	ZBTB40	420.6	620.6	526	642.1	555.7	577.7	733.2	699.1	713.3	547.6
Gamma-enolase OS=Homo sapiens OX=9606 GN=ENO2 PE=1 SV=3	ENO2	460.8	629.4	634.4	520.7	398.6	641.6	536	603.7	685.4	669.3
Protein Spindly OS=Homo sapiens OX=9606 GN=SPDL1 PE=1 SV=2	SPDL1	21.4	28.6	33.1	35.4	22.6	39.5	33.8	26.9	34.1	28.8
Coiled-coil-helix-coiled-coil-helix domain-containing protein 2 OS=Homo sapiens OX=9606 GN=CHCHD2 PE=1 SV=1	CHCHD2	329	428.1	430	364.5	346.9	458.3	391.8	442.4	460.5	446.8
Peptidyl-prolyl cis-trans isomerase F, mitochondrial OS=Homo sapiens OX=9606 GN=PPIF PE=1 SV=1	PPIF	1504.2	2240.5	2500.5	1862.6	1677.7	2095.2	1789.1	1977.8	2296.8	2307.9
CAD protein OS=Homo sapiens OX=9606 GN=CAD PE=1 SV=3	CAD	6344.2	7788.6	7151.6	8503	6991.5	8833.4	9367.1	8982.9	8764.2	8487.4
Trafficking protein particle complex subunit 12 OS=Homo sapiens OX=9606 GN=TRAPPC12 PE=1 SV=3	TRAPPC12	103.1	115.7	127.6	84.2	83.3	141.6	131.8	142.5	128.9	120.9
Cystathionine gamma-lyase OS=Homo sapiens OX=9606 GN=CTH PE=1 SV=3	CTH	457	581.6	508.2	607.2	485.3	636.1	660	682.2	670.2	682.4
GrpE protein homolog 1, mitochondrial OS=Homo sapiens OX=9606 GN=GRPEL1 PE=1 SV=2	GRPEL1	4961	7551.5	8038.6	6024.9	5299.4	6899.5	5856	6468.8	7463.1	7331.5
5'-nucleotidase domain-containing protein 1 OS=Homo sapiens OX=9606 GN=NT5DC1 PE=1 SV=1	NT5DC1	1732	2274.2	1957.7	2480.7	1912.9	2425.1	2590	2334.8	2348.4	2102.7
Sal-like protein 2 OS=Homo sapiens OX=9606 GN=SALL2 PE=1 SV=3	SALL2	117.4	139.4	142	120.8	121.1	159.7	158.7	149.7	165.4	164.5
ADP-ribosylation factor-binding protein GGA3 OS=Homo sapiens OX=9606 GN=GGA3 PE=1 SV=1	GGA3	161.2	228.1	180.5	226.8	165.4	236.3	201.2	213.3	217.1	216.4
YrdC domain-containing protein, mitochondrial OS=Homo sapiens OX=9606 GN=YRDC PE=1 SV=1	YRDC	281.1	284.3	324.6	296.5	257.9	325.7	375.9	286.5	406.6	328
Sec1 family domain-containing protein 1 OS=Homo sapiens OX=9606 GN=SCFD1 PE=1 SV=4	SCFD1	746.4	941.3	921.6	1049.4	893.9	1163.8	1130.1	1087.7	1131.6	1071.7
Growth arrest and DNA damage-inducible proteins-interacting protein 1 OS=Homo sapiens OX=9606 GN=GADD45GIP1 PE=1 SV=1	GADD45GIP1	13.1	21.5	19.5	12.8	12.2	18.2	19.6	19.4	17	19
Zinc finger protein 414 OS=Homo sapiens OX=9606 GN=ZNF414 PE=1 SV=2	ZNF414	34.5	54.8	66.5	40.6	42	52.5	57.4	52	59.6	53.4
Aminoacyl tRNA synthase complex-interacting multifunctional protein 2 OS=Homo sapiens OX=9606 GN=AIMP2 PE=1 SV=2	AIMP2	1606.2	1885	1831.3	2076.9	1915.6	2082.9	2435.3	2306	2295.8	2179.6
COP9 signalosome complex subunit 4 OS=Homo sapiens OX=9606 GN=COPS4 PE=1 SV=1	COPS4	1361.3	1669.2	1555.2	1785.7	1356.9	1957.3	1897.2	1803.1	1873.1	1729.8
Proliferation-associated protein 2G4 OS=Homo sapiens OX=9606 GN=PA2G4 PE=1 SV=3	PA2G4	11879.8	14650.9	13501.7	14909.9	11910.6	16494.9	16491.9	16102.6	16115.8	15379.7
DNA-directed RNA polymerase I subunit RPA49 OS=Homo sapiens OX=9606 GN=POLR1E PE=1 SV=3	POLR1E	112.4	207	161.4	211.2	187.7	177.6	235.3	214.6	211.1	195.8
N-myc downstream-regulated gene 2 protein (Fragment) OS=Homo sapiens OX=9606 GN=NDRG2 PE=1 SV=1	NDRG2	256.7	281.6	295.2	340.4	238.8	356.5	341.5	339.7	370.6	343.3
RING-type E3 ubiquitin transferase (Fragment) OS=Homo sapiens OX=9606 GN=RNF126 PE=1 SV=7	RNF126	156.9	234.6	219.6	234.9	175.5	252.2	242.2	248.4	262.8	222.8
Protein Mis18-alpha OS=Homo sapiens OX=9606 GN=MIS18A PE=1 SV=1	MIS18A	360.2	504.6	451.3	541.1	436.4	590.4	589.6	532.3	581.9	489.4
Plasminogen activator inhibitor 1 RNA-binding protein OS=Homo sapiens OX=9606 GN=SERBP1 PE=1 SV=2	SERBP1	12773	15390.1	14403.1	15111.7	12809	15012.9	17480.8	15335.3	16878.7	16816.5
CREB-regulated transcription coactivator 1 OS=Homo sapiens OX=9606 GN=CRTC1 PE=1 SV=1	CRTC1	34.8	44.8	46.6	34.7	35.4	48.3	33.9	48.6	46.9	45.7
Nuclear protein localization protein 4 homolog OS=Homo sapiens OX=9606 GN=NPLOC4 PE=1 SV=1	NPLOC4	288.1	364.9	339.2	387.4	407.3	328.3	449.5	407.9	427.8	420.2
Nuclear valosin-containing protein-like OS=Homo sapiens OX=9606 GN=NVL PE=1 SV=1	NVL	178.2	261	207.7	284.1	246.2	262.5	296.1	276.6	277.1	269.7
Fructose-bisphosphate aldolase A OS=Homo sapiens OX=9606 GN=ALDOA PE=1 SV=2	ALDOA	22620.4	24429.7	25932.5	24779.3	20278.4	29360.6	27728.4	27433.1	29049.5	27437.9
3-ketoacyl-CoA thiolase, mitochondrial OS=Homo sapiens OX=9606 GN=ACAA2 PE=1 SV=2	ACAA2	196.9	235.4	224.1	221.7	210.2	273.5	246.2	251.9	248	266.8
Uridine/cytidine kinase OS=Homo sapiens OX=9606 GN=UCK2 PE=1 SV=1	UCK2	131.2	151.3	139.5	169.1	138.9	178.1	184.4	187.2	178.9	176.2
Mitochondrial import inner membrane translocase subunit TIM44 OS=Homo sapiens OX=9606 GN=TIMM44 PE=1 SV=2	TIMM44	1714.9	2289.6	2044.8	2320.2	2224	2378.7	2653	2561.1	2366.4	2436.4
UPF0235 protein C15orf40 (Fragment) OS=Homo sapiens OX=9606 GN=C15orf40 PE=1 SV=2	C15orf40	104.7	148.7	137.6	137.8	117.2	170.1	162	151	176.9	148.6
Glutaredoxin-3 OS=Homo sapiens OX=9606 GN=GLRX3 PE=1 SV=2	GLRX3	3220.6	3747.9	3929.3	3781.7	2990.7	4209.4	4247.5	4083	4440.2	4175
Symplekin OS=Homo sapiens OX=9606 GN=SYMPK PE=1 SV=2	SYMPK	589.7	764.2	679.6	834.4	732.4	850.1	866.5	884.9	834.9	819.3
Membrane-associated progesterone receptor component 2 OS=Homo sapiens OX=9606 GN=PGRMC2 PE=1 SV=1	PGRMC2	11.1	25.8	15.9	22.1	19.2	16.3	20.3	18.7	15.5	24.7
UDP-N-acetylhexosamine pyrophosphorylase OS=Homo sapiens OX=9606 GN=UAP1 PE=1 SV=3	UAP1	845.6	1077.5	967.7	1143.1	883.4	1154.3	1233.3	1137.8	1189.1	1144.9
Cytosolic Fe-S cluster assembly factor NUBP1 OS=Homo sapiens OX=9606 GN=NUBP1 PE=1 SV=2	NUBP1	67.9	109.3	87.8	77.9	64.1	93.9	85.2	94.2	93.7	85.8
ORC ubiquitin ligase 1 OS=Homo sapiens OX=9606 GN=OBI1 PE=1 SV=1	OBI1	28.7	55.3	39.7	58.1	36.6	59.7	56.7	48.3	58.6	46.3
UBX domain-containing protein 7 OS=Homo sapiens OX=9606 GN=UBXN7 PE=1 SV=2	UBXN7	294.3	358.5	329.2	391.7	282.9	428.2	385.9	386.8	390.5	396
40S ribosomal protein S19 OS=Homo sapiens OX=9606 GN=RPS19 PE=1 SV=2	RPS19	1902.5	2979.7	2712.1	2313.8	2273.7	2157.9	3095.5	3187.2	2823.7	3267.2
Alpha-ketoglutarate-dependent dioxygenase FTO OS=Homo sapiens OX=9606 GN=FTO PE=1 SV=1	FTO	246.7	304.5	295.4	340.4	251	350.6	345	346.9	354.8	335.9
von Hippel-Lindau disease tumor suppressor OS=Homo sapiens OX=9606 GN=VHL PE=1 SV=2	VHL	73	100.4	113.5	103.2	70.2	110.3	104.5	98.7	113.5	97.3
BRISC and BRCA1-A complex member 1 (Fragment) OS=Homo sapiens OX=9606 GN=BABAM1 PE=1 SV=1	BABAM1	208.2	244	251.4	276.6	214.2	288.1	276	277.9	298.2	276.5
DNA replication licensing factor MCM2 OS=Homo sapiens OX=9606 GN=MCM2 PE=1 SV=4	MCM2	7225.6	8921.8	8030.2	9442.4	8205.4	9988.9	11376.7	10806	10391.9	9925.4
Neudesin OS=Homo sapiens OX=9606 GN=NENF PE=1 SV=1	NENF	357.4	490.3	475.7	430.4	370.5	493.4	442.1	463.1	538.1	525.2
SAP30-binding protein OS=Homo sapiens OX=9606 GN=SAP30BP PE=1 SV=1	SAP30BP	14.3	19.5	22.5	21.7	16.4	22.1	27.3	23.5	23.2	20.7
E3 UFM1-protein ligase 1 OS=Homo sapiens OX=9606 GN=UFL1 PE=1 SV=2	UFL1	28.1	37.1	30.5	43.6	36.6	38.8	45.1	44.1	38.5	33.1
Tubulin beta-4A chain (Fragment) OS=Homo sapiens OX=9606 GN=TUBB4A PE=1 SV=8	TUBB4A	55.5	265.3	80.5	75.1	60.8	106.9	87.6	83.9	82.5	80
Protein kinase C iota type OS=Homo sapiens OX=9606 GN=PRKCI PE=1 SV=2	PRKCI	38	59.6	58.1	63.3	52.9	54.1	67.3	69.7	63.2	47.4
TAF5-like RNA polymerase II p300/CBP-associated factor-associated factor 65 kDa subunit 5L OS=Homo sapiens OX=9606 GN=TAF5L PE=1 SV=1	TAF5L	9.5	9.9	11	13.6	9.1	13.1	12.9	11	15.1	10.9
Diphosphoinositol polyphosphate phosphohydrolase 2 OS=Homo sapiens OX=9606 GN=NUDT4 PE=1 SV=2	NUDT4	290.9	349.8	348.5	337.4	302.3	333.5	422.5	361.4	435.4	381.3
FAD synthase OS=Homo sapiens OX=9606 GN=FLAD1 PE=1 SV=1	FLAD1	132.8	208	156.2	177	143	178.3	190.9	183	194.2	198.2
39S ribosomal protein L43, mitochondrial (Fragment) OS=Homo sapiens OX=9606 GN=MRPL43 PE=1 SV=1	MRPL43	386.3	531.8	579.6	439.3	409	532.7	486.5	523.1	574.8	612.6
Sequestosome-1 (Fragment) OS=Homo sapiens OX=9606 GN=SQSTM1 PE=1 SV=1	SQSTM1	33.2	39.1	48.9	53	41.8	71.9	68.5	57.3	48.9	46.5
Synaptosomal-associated protein 23 OS=Homo sapiens OX=9606 GN=SNAP23 PE=1 SV=1	SNAP23	283.9	376.3	342.9	331.1	296.9	379.6	424.8	348.9	408.7	384.8
5-formyltetrahydrofolate cyclo-ligase OS=Homo sapiens OX=9606 GN=MTHFS PE=1 SV=2	MTHFS	130.6	212.8	180.1	178.3	150.4	187.2	223.6	206.9	220.9	189.5
3-hydroxyacyl-CoA dehydrogenase type-2 OS=Homo sapiens OX=9606 GN=HSD17B10 PE=1 SV=3	HSD17B10	3076.6	4091.3	4048.7	3916.6	3355.6	4856.8	4341.8	4421.3	4627.8	4225.3
Eukaryotic translation initiation factor 3 subunit G (Fragment) OS=Homo sapiens OX=9606 GN=EIF3G PE=1 SV=1	EIF3G	61.1	72.1	90.3	64.9	57.6	72	84.9	65.9	88.4	72.6
N-alpha-acetyltransferase 25, NatB auxiliary subunit OS=Homo sapiens OX=9606 GN=NAA25 PE=1 SV=1	NAA25	314.1	480	300.2	447.5	432	445.7	541.2	500.1	425.5	401.3
Protein KTI12 homolog OS=Homo sapiens OX=9606 GN=KTI12 PE=1 SV=1	KTI12	21	24.7	20.6	27.2	21	25.9	29.8	24.1	24.4	27.8
Zinc finger CCCH domain-containing protein 4 (Fragment) OS=Homo sapiens OX=9606 GN=ZC3H4 PE=1 SV=1	ZC3H4	419	563.3	523.2	562	448	587.1	540	611.8	586.4	565
Regulator of microtubule dynamics protein 1 OS=Homo sapiens OX=9606 GN=RMDN1 PE=1 SV=1	RMDN1	151.6	199.7	194.7	231.1	188.2	250.4	235	227.9	212.4	228.8
DNA-directed RNA polymerase II subunit F OS=Homo sapiens OX=9606 GN=POLR2F PE=1 SV=1	POLR2F	39.3	52.5	53.8	47.9	37.5	63	55	50.9	52.5	53.5
PHD finger-like domain-containing protein 5A OS=Homo sapiens OX=9606 GN=PHF5A PE=1 SV=1	PHF5A	450	611.5	669.8	559.4	471.9	619.5	610.7	612.9	771.5	727.9
39S ribosomal protein L21, mitochondrial OS=Homo sapiens OX=9606 GN=MRPL21 PE=1 SV=2	MRPL21	12	17.8	16.1	21.2	24.4	16.5	24.2	27.7	17.3	18.3
Lethal(2) giant larvae protein homolog 1 OS=Homo sapiens OX=9606 GN=LLGL1 PE=1 SV=3	LLGL1	85.4	107.9	108.8	127.3	106.2	125	134.7	127.2	118.4	115.9
Annexin A2 OS=Homo sapiens OX=9606 GN=ANXA2 PE=1 SV=2	ANXA2	2950.9	3633.3	3311.7	3648.5	2917.9	4157.4	3978.6	3864.8	3903.3	3843.7
Heterogeneous nuclear ribonucleoprotein H3 OS=Homo sapiens OX=9606 GN=HNRNPH3 PE=1 SV=2	HNRNPH3	2519.5	3912.6	4517.2	3061.5	2676.4	3462.2	2886.4	3624	3621	4164
E3 ubiquitin-protein ligase UBR5 OS=Homo sapiens OX=9606 GN=UBR5 PE=1 SV=2	UBR5	119.8	140.8	137.1	173.8	137.4	166.2	158.3	169.4	166.3	156.1
Fumarylacetoacetate hydrolase domain-containing protein 2A OS=Homo sapiens OX=9606 GN=FAHD2A PE=1 SV=1	FAHD2A	771.1	956.6	983.3	864.6	755.8	1059.8	1017	1083.5	1110.8	1045.8
Coiled-coil domain-containing protein 117 OS=Homo sapiens OX=9606 GN=CCDC117 PE=1 SV=1	CCDC117	65.6	75.1	75.1	83	65	89.8	92.1	87.7	87	97.8
Polyribonucleotide nucleotidyltransferase 1, mitochondrial OS=Homo sapiens OX=9606 GN=PNPT1 PE=1 SV=2	PNPT1	1920.2	2476.8	2400.9	2413.1	2175	2872	2785.4	2688.6	2871.9	2561.3
Mediator of RNA polymerase II transcription subunit 15 OS=Homo sapiens OX=9606 GN=MED15 PE=1 SV=2	MED15	70.6	94.7	108.4	94.6	74.3	105.3	92.3	95.5	103.5	99.2
Intron Large complex component GCFC2 OS=Homo sapiens OX=9606 GN=GCFC2 PE=1 SV=2	GCFC2	49.5	61.2	49.6	71.3	57.1	68	73.7	65.8	65.3	57.3
U6 snRNA-associated Sm-like protein LSm7 OS=Homo sapiens OX=9606 GN=LSM7 PE=1 SV=1	LSM7	692.4	955.3	1094.2	748.9	633.7	949.7	814.9	950.2	1060.6	1077.3
Serine/threonine-protein kinase 10 OS=Homo sapiens OX=9606 GN=STK10 PE=1 SV=1	STK10	6.1	10.7	9.9	10.7	8.2	7.8	10.2	16.2	14.1	10.3
AP-1 complex subunit mu-1 OS=Homo sapiens OX=9606 GN=AP1M1 PE=1 SV=1	AP1M1	400.6	537.2	464.3	550.6	501.6	509.1	612.5	626.2	601.8	573.6
3-hydroxyisobutyrate dehydrogenase, mitochondrial OS=Homo sapiens OX=9606 GN=HIBADH PE=1 SV=2	HIBADH	196.8	255.5	279.4	220.4	189.2	269.9	211.9	245.5	257.2	252.7
Stress-70 protein, mitochondrial OS=Homo sapiens OX=9606 GN=HSPA9 PE=1 SV=2	HSPA9	14682.5	18752.7	19119	17406	15955.7	22343.3	20722.9	20010.8	21675.3	20015.3
Neurolysin, mitochondrial OS=Homo sapiens OX=9606 GN=NLN PE=1 SV=1	NLN	373.6	509.6	435.1	527.8	424.2	534	571.9	520.3	513.9	488.4
39S ribosomal protein S30, mitochondrial OS=Homo sapiens OX=9606 GN=MRPS30 PE=1 SV=2	MRPS30	59.3	91.3	79.3	85.3	96.5	73.8	109.6	92.2	96.5	102.2
L-xylulose reductase OS=Homo sapiens OX=9606 GN=DCXR PE=1 SV=2	DCXR	1341.1	1690.3	1513.9	1760.6	1408.6	1836.5	1932.3	1874.4	1903.3	1741.3
Nuclear pore complex protein Nup93 OS=Homo sapiens OX=9606 GN=NUP93 PE=1 SV=2	NUP93	4740.7	5869.6	5512	6149.2	5542.2	6491.2	6824.2	6425.6	6444.3	6064.9
Coiled-coil domain-containing protein 25 OS=Homo sapiens OX=9606 GN=CCDC25 PE=1 SV=2	CCDC25	390.7	370.4	447.4	352.9	337.2	424.3	415	399.6	403.7	492.8
Protein S100-A11 OS=Homo sapiens OX=9606 GN=S100A11 PE=1 SV=2	S100A11	382.8	392.1	448.3	361.2	314.2	474.5	439.4	468.4	464.7	442.8
General transcription factor IIF subunit 1 OS=Homo sapiens OX=9606 GN=GTF2F1 PE=1 SV=2	GTF2F1	440.9	608.9	529.4	635.9	468.3	637	640.2	615.4	670.2	623.8
Cell division cycle protein 16 homolog OS=Homo sapiens OX=9606 GN=CDC16 PE=1 SV=2	CDC16	193.2	258.8	217.5	299.5	272.1	264.1	323	302.6	297.5	275.2
Importin subunit alpha-4 OS=Homo sapiens OX=9606 GN=KPNA3 PE=1 SV=2	KPNA3	377.1	553.6	442.8	524.7	414.5	582.9	574	549.9	555.9	518.4
Proteasome inhibitor PI31 subunit OS=Homo sapiens OX=9606 GN=PSMF1 PE=1 SV=2	PSMF1	146.1	185.3	193.6	200.5	145.8	211	199.5	181.3	218.3	224.5
Coilin OS=Homo sapiens OX=9606 GN=COIL PE=1 SV=1	COIL	471.6	670.6	606	676.8	636.3	644.3	757.4	731.7	689.1	698.2
Serine/threonine-protein phosphatase PGAM5, mitochondrial OS=Homo sapiens OX=9606 GN=PGAM5 PE=1 SV=2	PGAM5	1390.6	1937.3	1747.3	1802.3	1855.4	1846.1	2166.6	2031	1992.9	1893.7
Coiled-coil domain-containing protein 97 OS=Homo sapiens OX=9606 GN=CCDC97 PE=1 SV=1	CCDC97	31.2	42.4	43.6	44.9	36.1	45.3	45.9	41.2	56.8	45.1
EEF1E1-BLOC1S5 readthrough (NMD candidate) OS=Homo sapiens OX=9606 GN=EEF1E1-BLOC1S5 PE=4 SV=2	EEF1E1-BLOC1S5	1267	1868.7	1547.9	1886.6	1560.7	1967.2	2090.3	2172.9	1941.9	1826.7
S-methyl-5'-thioadenosine phosphorylase OS=Homo sapiens OX=9606 GN=MTAP PE=1 SV=2	MTAP	856.3	876.3	980.7	1012.5	791.4	1090.7	1111.6	1010.5	1101.7	1031.2
Glutaredoxin-related protein 5, mitochondrial OS=Homo sapiens OX=9606 GN=GLRX5 PE=1 SV=2	GLRX5	1097.1	1362.2	1437.5	1059.9	1007.8	1499.3	1303.3	1386.9	1447.7	1390.7
Eukaryotic translation initiation factor 4E-binding protein 1 OS=Homo sapiens OX=9606 GN=EIF4EBP1 PE=1 SV=3	EIF4EBP1	163.7	185.7	184	198.3	152.2	218.1	212.9	213.5	211.9	195.6
Bifunctional glutamate/proline--tRNA ligase OS=Homo sapiens OX=9606 GN=EPRS1 PE=1 SV=5	EPRS1	8863.2	11498.4	10244.2	11526.9	10658.5	11881.8	13600.9	12897.1	12518.2	11522.9
Serine/arginine-rich splicing factor 5 OS=Homo sapiens OX=9606 GN=SRSF5 PE=1 SV=1	SRSF5	845.9	1482.2	1395.9	1150.9	873.4	1154.8	1076.9	1161.6	1480.9	1350
Mitochondrial inner membrane protein OXA1L OS=Homo sapiens OX=9606 GN=OXA1L PE=1 SV=1	OXA1L	357.6	562.2	482.7	381.1	486.4	448.4	641.2	547.6	592.3	607.3
HAUS augmin-like complex subunit 1 OS=Homo sapiens OX=9606 GN=HAUS1 PE=1 SV=1	HAUS1	19.9	22.7	21.2	23.2	20.2	24.8	25.7	24.3	25.2	27.7
Protein SCO1 homolog, mitochondrial OS=Homo sapiens OX=9606 GN=SCO1 PE=1 SV=1	SCO1	79.6	115.9	101.6	100.8	104.4	107.2	125.5	118.1	121.3	130.3
COP9 signalosome complex subunit 6 OS=Homo sapiens OX=9606 GN=COPS6 PE=1 SV=1	COPS6	1331.3	1495	1504.5	1688.8	1309.1	1740.3	1879.8	1730.5	1834.2	1676
General transcription factor IIF subunit 2 OS=Homo sapiens OX=9606 GN=GTF2F2 PE=1 SV=2	GTF2F2	68.2	71.9	73	68.9	65	74.2	80.3	72.6	85.6	93.4
Serine hydroxymethyltransferase, mitochondrial OS=Homo sapiens OX=9606 GN=SHMT2 PE=1 SV=3	SHMT2	3716.4	4846.3	4837.7	4855.9	4370.7	5413.7	5383	5606	5622.4	5451.3
Squamous cell carcinoma antigen recognized by T-cells 3 OS=Homo sapiens OX=9606 GN=SART3 PE=1 SV=1	SART3	496.6	693.7	514.4	733.1	606.8	677.8	784.1	750.1	696.2	709
Putative nascent polypeptide-associated complex subunit alpha-like protein OS=Homo sapiens OX=9606 GN=NACA4P PE=5 SV=1	NACA4P	246.7	291.7	283.9	302.8	247.6	316.2	329.2	277.8	329	308.8
Probable tRNA N6-adenosine threonylcarbamoyltransferase OS=Homo sapiens OX=9606 GN=OSGEP PE=1 SV=1	OSGEP	201.3	250.9	226.6	274.2	215.6	258.2	295.7	266.2	274.3	268.7
Profilin OS=Homo sapiens OX=9606 GN=PFN2 PE=1 SV=1	PFN2	673.5	971.1	870.3	922.4	730.7	998.3	990.1	927.1	1091.8	910.6
Eukaryotic translation initiation factor 3 subunit G (Fragment) OS=Homo sapiens OX=9606 GN=EIF3G PE=1 SV=8	EIF3G	104	133.8	119.3	108.7	85.9	136.2	124.4	138.2	145.4	129.7
Trifunctional purine biosynthetic protein adenosine-3 OS=Homo sapiens OX=9606 GN=GART PE=1 SV=1	GART	9595.4	11635.2	10765.3	12453.9	9632.1	12695	13200.2	12469	12758.2	12032.3
Fibronectin type III domain containing 3A, isoform CRA_f OS=Homo sapiens OX=9606 GN=FNDC3A PE=1 SV=1	FNDC3A	12.6	17.5	12.6	10	23.2	16.1	19.5	23.4	21.1	21.3
Regulator of nonsense transcripts 2 OS=Homo sapiens OX=9606 GN=UPF2 PE=1 SV=1	UPF2	56.2	70.6	74	83.2	69	76.4	89.4	80.2	91	75.4
Protein FAM207A (Fragment) OS=Homo sapiens OX=9606 GN=FAM207A PE=1 SV=1	FAM207A	89.2	149.9	119.3	133.6	119.3	123.5	147.8	148.8	144.7	139.4
Single-stranded DNA-binding protein, mitochondrial OS=Homo sapiens OX=9606 GN=SSBP1 PE=1 SV=1	SSBP1	921.5	1434.6	1980.4	935.7	933.9	1253.4	1152.5	1226.9	1752.1	1730.9
DnaJ homolog subfamily C member 3 OS=Homo sapiens OX=9606 GN=DNAJC3 PE=1 SV=1	DNAJC3	174.6	220.3	223.7	227.5	203.2	234.7	268.5	258.5	271.3	252.4
U3 small nucleolar RNA-associated protein 15 homolog OS=Homo sapiens OX=9606 GN=UTP15 PE=1 SV=3	UTP15	36.7	62.2	52.3	56.9	63.8	52.1	69.2	71	54	56.8
Tropomyosin 1 (Alpha), isoform CRA_m OS=Homo sapiens OX=9606 GN=TPM1 PE=1 SV=1	TPM1	497.8	637.7	572.5	699.5	540.4	723.9	667.3	674.4	664	671.4
E3 ubiquitin-protein ligase RING1 OS=Homo sapiens OX=9606 GN=RING1 PE=1 SV=2	RING1	144.5	173.4	196.2	176.5	143.5	196.3	162.8	180.3	217.7	195.9
Methionine synthase OS=Homo sapiens OX=9606 GN=MTR PE=1 SV=2	MTR	210.7	198.8	245.5	291.4	217.8	238	256.3	251.4	315.1	342.5
Signal recognition particle subunit SRP68 OS=Homo sapiens OX=9606 GN=SRP68 PE=1 SV=2	SRP68	2212.3	3240.3	2562.4	3181.5	2750.3	2972.9	3688	3598.1	3314.6	3416.7
Mitochondrial import inner membrane translocase subunit Tim10 B OS=Homo sapiens OX=9606 GN=TIMM10B PE=1 SV=1	TIMM10B	16.6	15.7	20.4	19.2	17.3	23.2	20.1	22	16.1	21.5
Phosphatidylethanolamine-binding protein 1 OS=Homo sapiens OX=9606 GN=PEBP1 PE=1 SV=3	PEBP1	3363.7	4768.9	6945	3211.2	2511.1	4565.7	4002.3	4670.9	5855	6662.9
Transcription elongation regulator 1 OS=Homo sapiens OX=9606 GN=TCERG1 PE=1 SV=2	TCERG1	3463.5	4456.6	4056.2	5000.4	3808.9	4860.5	4712.8	4675.6	4741.4	4777.3
High mobility group protein B3 OS=Homo sapiens OX=9606 GN=HMGB3 PE=1 SV=4	HMGB3	898	1125.2	1012	1058.7	905.6	1008.6	1302.4	1165.8	1186.1	1116.5
Farnesyltransferase, CAAX box, alpha, isoform CRA_c OS=Homo sapiens OX=9606 GN=FNTA PE=1 SV=1	FNTA	558	600.6	622.6	664	535.4	681.8	718.7	647.2	725.6	664.9
Ribulose-phosphate 3-epimerase OS=Homo sapiens OX=9606 GN=RPE PE=1 SV=1	RPE	56.3	86.4	111	58.7	43.9	76.3	63.6	78.7	101.9	111.2
RPOL4c domain-containing protein (Fragment) OS=Homo sapiens OX=9606 PE=3 SV=2	3	94.8	120.8	120.1	113.1	87.8	128.5	119.3	130.7	131.6	130.5
Muscleblind-like protein 1 OS=Homo sapiens OX=9606 GN=MBNL1 PE=1 SV=1	MBNL1	458.4	685.7	745.9	553.4	469.5	621.5	510.2	631.4	683.6	732.7
ATP-dependent RNA helicase DDX1 OS=Homo sapiens OX=9606 GN=DDX1 PE=1 SV=2	DDX1	4442.7	6902	5074.6	7094.5	6060.8	6020.3	8126.1	7673.8	6913.7	6584.4
Collagen alpha-1(IV) chain (Fragment) OS=Homo sapiens OX=9606 GN=COL4A1 PE=1 SV=1	COL4A1	39.1	55.9	44.9	48	46.4	56.2	55.3	51.7	48.4	58.2
DNA-directed RNA polymerases I, II, and III subunit RPABC5 OS=Homo sapiens OX=9606 GN=POLR2L PE=1 SV=1	POLR2L	124	177.8	182.8	137.3	124.9	168	178.2	197.2	192.3	201.6
Nucleolar protein 11 OS=Homo sapiens OX=9606 GN=NOL11 PE=1 SV=1	NOL11	1005.6	1139.8	1190.8	1416	1229.9	1388.8	1453	1371.5	1414.8	1314.5
COMM domain-containing protein 8 OS=Homo sapiens OX=9606 GN=COMMD8 PE=1 SV=1	COMMD8	545.9	697.1	699.1	674	553.8	739.7	762.9	708.5	787.4	723.8
Polypyrimidine tract-binding protein 3 OS=Homo sapiens OX=9606 GN=PTBP3 PE=1 SV=2	PTBP3	18.9	25.2	22	21.8	19.7	19.1	25.8	25.3	25.9	27.3
Methionine--tRNA ligase, cytoplasmic OS=Homo sapiens OX=9606 GN=MARS1 PE=1 SV=2	MARS1	5087	6402.2	5868.8	7095	5942.6	6884.9	7427.1	7444.3	7095.5	6949.3
Tropomyosin alpha-4 chain OS=Homo sapiens OX=9606 GN=TPM4 PE=1 SV=3	TPM4	388	469.8	440.5	530.2	413.8	548.9	520	497.5	522.2	522.8
Serine/threonine-protein phosphatase 4 regulatory subunit 3A OS=Homo sapiens OX=9606 GN=PPP4R3A PE=1 SV=1	PPP4R3A	999.6	1225.4	1098.4	1312.1	1042.1	1351	1363.6	1272.5	1349.7	1257.7
Coiled-coil-helix-coiled-coil-helix domain-containing protein 5 OS=Homo sapiens OX=9606 GN=CHCHD5 PE=1 SV=1	CHCHD5	13.2	17.8	25.1	17.5	16.9	20.6	14.5	19	22.5	20.9
ADP-sugar pyrophosphatase OS=Homo sapiens OX=9606 GN=NUDT5 PE=1 SV=1	NUDT5	745.5	916	835.9	939.3	705.6	1028.3	1008.7	958.9	970.6	933
Hsc70-interacting protein OS=Homo sapiens OX=9606 GN=ST13 PE=1 SV=2	ST13	12481	13522.2	14538.7	13961.2	11476.9	15478.8	14948.7	14355.7	15853.4	14879.2
COP9 signalosome complex subunit 5 OS=Homo sapiens OX=9606 GN=COPS5 PE=1 SV=4	COPS5	1002	1220	1141.9	1359.5	1006.4	1353.1	1348.7	1314.1	1356.8	1212.2
ADP-ribose pyrophosphatase, mitochondrial (Fragment) OS=Homo sapiens OX=9606 GN=NUDT9 PE=1 SV=1	NUDT9	88.6	118.3	111.6	110.7	93.5	132.4	128.7	123	122.3	115.5
N-alpha-acetyltransferase 15, NatA auxiliary subunit OS=Homo sapiens OX=9606 GN=NAA15 PE=1 SV=1	NAA15	8.4	13.8	10.2	15.6	13.9	7.7	18.4	11.7	17.5	12.7
28S ribosomal protein S25, mitochondrial OS=Homo sapiens OX=9606 GN=MRPS25 PE=1 SV=1	MRPS25	75.9	116.8	106.6	86.6	95.6	102.4	127.5	120.8	115.3	132.8
dCTP pyrophosphatase 1 OS=Homo sapiens OX=9606 GN=DCTPP1 PE=1 SV=1	DCTPP1	2763.5	3305.5	3455.6	3166.1	2485.4	3717.3	3651.3	3596.7	4092.8	3774.7
Eukaryotic translation initiation factor 6 OS=Homo sapiens OX=9606 GN=EIF6 PE=1 SV=1	EIF6	688.9	948.1	800.9	857.5	668.3	963.4	888	917.4	897.5	828.8
Elongation factor 2 OS=Homo sapiens OX=9606 GN=EEF2 PE=1 SV=4	EEF2	45892.4	55058.7	51858.4	56707.6	46161.6	57767.8	64811	58701.1	61595.8	56953.8
Splicing factor U2AF 35 kDa subunit OS=Homo sapiens OX=9606 GN=U2AF1 PE=1 SV=3	U2AF1	389.5	630.5	532.4	485.7	481.8	436.4	563.6	610	535.3	619.6
Delta-1-pyrroline-5-carboxylate dehydrogenase, mitochondrial OS=Homo sapiens OX=9606 GN=ALDH4A1 PE=1 SV=3	ALDH4A1	140	183.2	159.3	172.8	147.6	188.9	185.3	181	185.5	184.3
Probable ATP-dependent RNA helicase DDX56 OS=Homo sapiens OX=9606 GN=DDX56 PE=1 SV=1	DDX56	687.4	1257.3	844.9	1198.1	1233.3	944.4	1389	1435.4	1177.1	1318.2
TGF-beta-activated kinase 1 and MAP3K7-binding protein 1 OS=Homo sapiens OX=9606 GN=TAB1 PE=1 SV=1	TAB1	244.3	312.9	297.3	352.5	255.3	334.9	336	340.7	351.2	339.8
Glucosamine 6-phosphate N-acetyltransferase OS=Homo sapiens OX=9606 GN=GNPNAT1 PE=1 SV=1	GNPNAT1	705	789.5	776.2	828	706.1	940	1015.5	888.1	993.4	857.1
HCG2039996 OS=Homo sapiens OX=9606 GN=PPAN-P2RY11 PE=3 SV=1	PPAN-P2RY11	107.8	166.1	134.3	188.3	186.1	145.2	223.9	218.3	174.5	192.4
Protein S100-A13 OS=Homo sapiens OX=9606 GN=S100A13 PE=1 SV=1	S100A13	1669.3	2115.9	2065.5	1880.1	1445.2	2248.5	2011.1	2112.3	2092.8	2227.5
Histone chaperone ASF1A OS=Homo sapiens OX=9606 GN=ASF1A PE=1 SV=1	ASF1A	723.5	815.9	752.5	906.9	744.4	1030.6	1022	828	973.4	825.5
Multifunctional methyltransferase subunit TRM112-like protein OS=Homo sapiens OX=9606 GN=TRMT112 PE=1 SV=1	TRMT112	309.4	424.3	502.7	307.9	280	416.8	410.6	464.7	502.4	558.6
Serine/threonine-protein phosphatase 2A catalytic subunit alpha isoform OS=Homo sapiens OX=9606 GN=PPP2CA PE=1 SV=1	PPP2CA	486	620.6	546.8	712.3	472.2	668.1	630.2	626.2	570.6	588.5
C-1-tetrahydrofolate synthase, cytoplasmic OS=Homo sapiens OX=9606 GN=MTHFD1 PE=1 SV=3	MTHFD1	14274.7	17337.9	16618.1	17650.9	13965.7	19392.1	18790	18069.4	18934.6	17364.8
Target of rapamycin complex subunit LST8 OS=Homo sapiens OX=9606 GN=MLST8 PE=1 SV=1	MLST8	60.5	77.7	71.8	62.1	54.5	81.5	77.3	79.2	78.4	81.1
Rab-like protein 6 OS=Homo sapiens OX=9606 GN=RABL6 PE=1 SV=1	RABL6	66.8	97	80.1	98.2	79.1	90	107.4	96.9	92.9	95.3
Histone-arginine methyltransferase CARM1 OS=Homo sapiens OX=9606 GN=CARM1 PE=1 SV=3	CARM1	779.9	944.1	889.3	984.2	777.9	1075.7	1064	1018.2	995.9	944
Gem-associated protein 4 OS=Homo sapiens OX=9606 GN=GEMIN4 PE=1 SV=1	GEMIN4	1122.8	1476.2	1280.5	1626.6	1351.4	1513.3	1644.6	1589.4	1504.7	1489.3
Tropomyosin 1 (Alpha), isoform CRA_o (Fragment) OS=Homo sapiens OX=9606 GN=TPM1 PE=1 SV=1	TPM1	359	441.1	417.9	480.5	396.8	529.6	479.3	478.2	509.1	509.6
Elongation factor 1-beta OS=Homo sapiens OX=9606 GN=EEF1B2 PE=1 SV=3	EEF1B2	5657.3	7302.7	8165.2	6259.4	5152.9	7612.1	6598	7309.3	8730.7	8502.6
Lupus La protein OS=Homo sapiens OX=9606 GN=SSB PE=1 SV=2	SSB	13622.3	15720.2	15349.9	17695.2	13554.1	18587.6	18240.6	17080.3	17770.2	16686.2
Ran-specific GTPase-activating protein OS=Homo sapiens OX=9606 GN=RANBP1 PE=1 SV=1	RANBP1	6082.3	7506.1	7095.2	7779.7	5687.2	8618.6	7552.5	8115.1	8089.4	8469.6
Protein SCO2 homolog, mitochondrial OS=Homo sapiens OX=9606 GN=SCO2 PE=1 SV=3	SCO2	54.3	71.5	63.5	56.1	67.6	64.9	79	72.6	74.5	79.6
Pre-mRNA-splicing factor CWC22 homolog (Fragment) OS=Homo sapiens OX=9606 GN=CWC22 PE=1 SV=1	CWC22	11.6	21.6	10.9	22	20.3	21.5	23.8	23.6	17.5	21
Mitochondrial import inner membrane translocase subunit Tim29 OS=Homo sapiens OX=9606 GN=TIMM29 PE=1 SV=2	TIMM29	30.2	45.2	41	34.1	43.4	34	53.7	46.9	46.8	49.1
Claspin OS=Homo sapiens OX=9606 GN=CLSPN PE=1 SV=3	CLSPN	12.8	16.5	15	16.7	15.3	20.4	17	19.8	17.9	14.2
Alcohol dehydrogenase class-3 OS=Homo sapiens OX=9606 GN=ADH5 PE=1 SV=4	ADH5	2628.3	3202.5	2854.1	3414.9	2590.1	3538.2	3503.2	3435.7	3521.4	3443.5
RRP15-like protein OS=Homo sapiens OX=9606 GN=RRP15 PE=1 SV=2	RRP15	324.4	563.6	431.2	515.1	436.4	566.9	581.7	528.1	551.4	483.9
Phosphoglucomutase-2 OS=Homo sapiens OX=9606 GN=PGM2 PE=1 SV=4	PGM2	626.8	796.1	637.1	865.4	640.9	842.8	835.6	840.1	793.9	860.5
PHD finger protein 6 OS=Homo sapiens OX=9606 GN=PHF6 PE=1 SV=1	PHF6	14.8	21.9	18.5	28.1	24.5	22.1	24.1	29	25.8	25.4
Pyrroline-5-carboxylate reductase 2 OS=Homo sapiens OX=9606 GN=PYCR2 PE=1 SV=1	PYCR2	1181.8	1343.7	1480.7	1487.6	1407.6	1690.6	1589.9	1590	1592.4	1523.1
ERI1 exoribonuclease 3 OS=Homo sapiens OX=9606 GN=ERI3 PE=1 SV=2	ERI3	177	191.1	209.5	228.3	171.1	223.9	249.9	239.4	215	216.3
p53 and DNA damage-regulated protein 1 OS=Homo sapiens OX=9606 GN=PDRG1 PE=1 SV=2	PDRG1	74	107.5	103.2	68.4	67.8	99.5	78.9	93.8	112.4	112.5
Golgi-resident adenosine 3',5'-bisphosphate 3'-phosphatase OS=Homo sapiens OX=9606 GN=BPNT2 PE=1 SV=1	BPNT2	33.7	67.1	59	60.9	50.6	58.3	68.5	67.3	69.6	59.4
Schlafen family member 11 OS=Homo sapiens OX=9606 GN=SLFN11 PE=1 SV=2	SLFN11	677.9	978.1	770.2	997.7	886.9	910.7	1127	1112.2	1034.1	1014
DNA replication licensing factor MCM7 OS=Homo sapiens OX=9606 GN=MCM7 PE=1 SV=4	MCM7	4226.5	5429.9	4779	5810.3	4588.9	5676.1	6313.1	5871.3	5850.7	5566.1
Protein DDI1 homolog 2 OS=Homo sapiens OX=9606 GN=DDI2 PE=1 SV=1	DDI2	281.6	367.4	423.1	360.9	259	397.2	356.7	382.3	386	379.3
Serine/threonine-protein phosphatase PP1-beta catalytic subunit OS=Homo sapiens OX=9606 GN=PPP1CB PE=1 SV=3	PPP1CB	159	200.4	187.1	217.2	187.2	213.5	232	236.7	218.6	215.1
Cleavage and polyadenylation specificity factor subunit 2 OS=Homo sapiens OX=9606 GN=CPSF2 PE=1 SV=2	CPSF2	506.4	620.4	597	660.2	555.1	720.4	693.9	681.5	701.4	638.3
G-patch domain and KOW motifs-containing protein OS=Homo sapiens OX=9606 GN=GPKOW PE=1 SV=2	GPKOW	600.3	741.8	783.3	779.5	579	821.1	726.5	766	832.4	844.8
Acidic leucine-rich nuclear phosphoprotein 32 family member E OS=Homo sapiens OX=9606 GN=ANP32E PE=1 SV=1	ANP32E	3068.5	3762.5	3782.8	3380.9	2612.3	4113.7	3568.3	3943.7	4011	4207
POTE ankyrin domain family member J OS=Homo sapiens OX=9606 GN=POTEJ PE=3 SV=1	POTEJ	784.7	946.9	925.3	981.2	829.6	988.5	1038	1040.4	1073.6	1032
10 kDa heat shock protein, mitochondrial OS=Homo sapiens OX=9606 GN=HSPE1 PE=1 SV=1	HSPE1	495.1	841.5	768.8	583.1	514	663.2	539.7	633.8	736.6	668.5
Protein disulfide-isomerase A3 (Fragment) OS=Homo sapiens OX=9606 GN=PDIA3 PE=1 SV=1	PDIA3	416.6	494.8	665.6	450.8	424.1	558.2	526.5	543.6	715.3	602.2
Histone deacetylase complex subunit SAP18 OS=Homo sapiens OX=9606 GN=SAP18 PE=1 SV=1	SAP18	1317.3	1962.4	2206.4	1410	1473.7	1765.2	1861.6	1855.5	2175.5	2034.3
40S ribosomal protein S29 OS=Homo sapiens OX=9606 GN=RPS29 PE=1 SV=2	RPS29	192.6	344.7	289.1	351.5	282.7	258.1	287	370.3	311.9	426.6
Delta(3,5)-Delta(2,4)-dienoyl-CoA isomerase, mitochondrial OS=Homo sapiens OX=9606 GN=ECH1 PE=1 SV=2	ECH1	627	836.4	797.6	819.9	730.6	918.9	916.5	906.5	877.5	834.5
Multiple coagulation factor deficiency protein 2 OS=Homo sapiens OX=9606 GN=MCFD2 PE=1 SV=1	MCFD2	152.7	235.4	199.2	246.4	183.3	253.1	257.2	226.4	271.3	204.2
Serine/threonine-protein phosphatase 1 regulatory subunit 10 OS=Homo sapiens OX=9606 GN=PPP1R10 PE=1 SV=1	PPP1R10	142.8	229.6	163.4	249.4	198.1	208.9	251.5	248.3	219.8	198.7
High mobility group protein HMGI-C OS=Homo sapiens OX=9606 GN=HMGA2 PE=1 SV=1	HMGA2	257	382.4	320.8	358.7	384.2	302.9	433.1	406.3	382	397.7
Ubiquitin carboxyl-terminal hydrolase 15 OS=Homo sapiens OX=9606 GN=USP15 PE=1 SV=3	USP15	346.3	386	396.9	454.1	357.2	439.6	469	426.9	483.3	437.8
Ribonuclease H2 subunit A OS=Homo sapiens OX=9606 GN=RNASEH2A PE=1 SV=2	RNASEH2A	277.4	345.8	358.1	265.1	266.7	371	369.9	374.9	403.1	377.3
Ubiquitin-like protein 4A OS=Homo sapiens OX=9606 GN=UBL4A PE=1 SV=1	UBL4A	281.9	361.1	330.4	307.8	254.5	376.9	332.8	352.1	365.7	387.6
tRNA (uracil-5-)-methyltransferase homolog A OS=Homo sapiens OX=9606 GN=TRMT2A PE=1 SV=2	TRMT2A	35.5	44.1	51.1	50.6	45.6	40.4	60.6	47.5	57.4	55.8
Cytosolic Fe-S cluster assembly factor NUBP2 OS=Homo sapiens OX=9606 GN=NUBP2 PE=1 SV=1	NUBP2	211.7	269.4	268.6	248.4	200.8	283.1	249.2	293.5	272.6	279
Heterogeneous nuclear ribonucleoprotein H OS=Homo sapiens OX=9606 GN=HNRNPH1 PE=1 SV=4	HNRNPH1	2109.2	3247.6	3877.9	2394	2166.3	2815.4	2392	2839.3	3464	3516.7
Anaphase-promoting complex subunit 1 OS=Homo sapiens OX=9606 GN=ANAPC1 PE=1 SV=1	ANAPC1	46.8	50.3	50.5	57.1	50.5	50	55	55.3	61.7	61.9
RNA-binding protein with serine-rich domain 1 (Fragment) OS=Homo sapiens OX=9606 GN=RNPS1 PE=1 SV=1	RNPS1	776	1024.7	1092.3	915.9	896.4	1170	1053	1059.4	1151.6	1094.9
Glutamine synthetase OS=Homo sapiens OX=9606 GN=GLUL PE=1 SV=1	GLUL	343.9	513.7	416.6	519.3	373.9	459.3	464.5	524.6	492.8	461.6
HEAT repeat-containing protein 6 OS=Homo sapiens OX=9606 GN=HEATR6 PE=1 SV=1	HEATR6	11.6	13.9	11.9	15.9	10.8	17	14.5	13.5	16.6	19.3
Eyes absent homolog OS=Homo sapiens OX=9606 GN=EYA3 PE=1 SV=1	EYA3	14.6	18.2	19.8	18.9	22.5	19.5	25.3	22.1	24	17.7
RNA 3'-terminal phosphate cyclase-like protein OS=Homo sapiens OX=9606 GN=RCL1 PE=1 SV=3	RCL1	155	256.3	188.1	229.9	219.5	214.5	272.3	254.7	244.4	251.4
Calpain-2 catalytic subunit OS=Homo sapiens OX=9606 GN=CAPN2 PE=1 SV=6	CAPN2	830.3	1205	974.1	1226.8	864.5	1129.2	979.5	1141.8	972.7	1056.4
Coronin OS=Homo sapiens OX=9606 GN=CORO7-PAM16 PE=1 SV=1	CORO7-PAM16	532.6	702.4	651.4	665.8	582.2	710.6	766.7	733.3	777.7	741
DNA replication licensing factor MCM4 OS=Homo sapiens OX=9606 GN=MCM4 PE=1 SV=5	MCM4	6557.3	8931.7	7341.4	9151.6	7770.7	8742.1	10110.7	9758	9113	8918.1
Uridine 5'-monophosphate synthase OS=Homo sapiens OX=9606 GN=UMPS PE=1 SV=1	UMPS	1346.5	1669	1587.5	1807	1432.4	1796.5	1851.8	1755.7	1848.5	1778.4
N-alpha-acetyltransferase 15, NatA auxiliary subunit OS=Homo sapiens OX=9606 GN=NAA15 PE=1 SV=1	NAA15	23.7	33.3	29.3	36.9	25.9	28	45.8	34.7	36.7	31.6
Heterogeneous nuclear ribonucleoprotein F OS=Homo sapiens OX=9606 GN=HNRNPF PE=1 SV=3	HNRNPF	2911	4872.6	6616.1	2915.9	2704.2	3876.6	3123.7	4152	5184	5686.5
Heat shock factor-binding protein 1 OS=Homo sapiens OX=9606 GN=HSBP1 PE=1 SV=1	HSBP1	311.9	297.7	318.8	349.5	301.6	403.6	400.9	359.6	376.2	367.7
Golgi-associated PDZ and coiled-coil motif-containing protein OS=Homo sapiens OX=9606 GN=GOPC PE=1 SV=1	GOPC	261.3	309.5	294.7	340	285.6	352	348.6	333.5	338.3	334.6
Oxygen-dependent coproporphyrinogen-III oxidase, mitochondrial OS=Homo sapiens OX=9606 GN=CPOX PE=1 SV=3	CPOX	732.3	1087.9	947.3	1018.8	998.8	975.4	1153.5	1120.1	1203.4	1107.4
Integrator complex subunit 7 OS=Homo sapiens OX=9606 GN=INTS7 PE=1 SV=1	INTS7	33	43.7	37.5	55	38.8	37.4	53.6	44.6	53.5	47.3
CCR4-NOT transcription complex subunit 9 OS=Homo sapiens OX=9606 GN=CNOT9 PE=1 SV=1	CNOT9	115.9	151.1	137.2	155	142.9	154.4	177.4	160.3	158.5	123.5
Zinc finger protein 593 OS=Homo sapiens OX=9606 GN=ZNF593 PE=1 SV=2	ZNF593	20.8	42.1	31	31.2	36.6	26.4	40.5	40	42.5	44.6
NAD kinase 2, mitochondrial OS=Homo sapiens OX=9606 GN=NADK2 PE=1 SV=2	NADK2	134.3	175.3	172	187.5	172.5	198.5	188.4	194.7	209.8	203
Dual specificity protein phosphatase 3 OS=Homo sapiens OX=9606 GN=DUSP3 PE=1 SV=1	DUSP3	491.4	628.1	568.4	612.8	435.4	663	584.3	643.2	627.4	679.4
Regulatory-associated protein of mTOR OS=Homo sapiens OX=9606 GN=RPTOR PE=1 SV=1	RPTOR	21.8	27.3	17.9	28.9	20.6	23.8	24.1	30.3	34.6	25.1
SET and MYND domain-containing protein 5 (Fragment) OS=Homo sapiens OX=9606 GN=SMYD5 PE=1 SV=1	SMYD5	83.9	96.6	90.2	110.1	84.8	111.8	116.9	102.5	107.5	84.5
NADH dehydrogenase [ubiquinone] 1 alpha subcomplex assembly factor 4 OS=Homo sapiens OX=9606 GN=NDUFAF4 PE=1 SV=1	NDUFAF4	13.9	22.6	16.2	13.3	13.3	18.5	14.6	18.3	16.4	17.1
ATP synthase subunit O, mitochondrial OS=Homo sapiens OX=9606 GN=ATP5PO PE=1 SV=1	ATP5PO	2451.4	2931.9	3201	2811.7	2670.3	3264.3	3204	3059.7	3335.2	3007.8
5-methylcytosine rRNA methyltransferase NSUN4 OS=Homo sapiens OX=9606 GN=NSUN4 PE=1 SV=1	NSUN4	88	109.9	99.1	113.3	107	92.8	131.9	112	120.1	101.5
Nuclear inhibitor of protein phosphatase 1 OS=Homo sapiens OX=9606 GN=PPP1R8 PE=1 SV=2	PPP1R8	353	437.7	461.3	486.2	380.4	494.6	477	492.2	503.7	481.5
Peflin OS=Homo sapiens OX=9606 GN=PEF1 PE=1 SV=1	PEF1	49.1	58.1	58.6	67.9	46	78.2	63.3	64.7	66.2	74.4
Zinc finger protein 718 OS=Homo sapiens OX=9606 GN=ZNF718 PE=2 SV=2	ZNF718	129.8	212.4	170.8	208.8	222	172.6	233.8	228.5	196.8	183
Peptidyl-prolyl cis-trans isomerase A OS=Homo sapiens OX=9606 GN=PPIA PE=1 SV=2	PPIA	12261.4	17992.6	25940.6	14827	11737.3	16298.9	13928.6	16882.1	20723.6	26654.6
Eukaryotic translation initiation factor 5A-1 OS=Homo sapiens OX=9606 GN=EIF5A PE=1 SV=2	EIF5A	14372.3	19338.1	19504.7	16202.7	13039	19111	17611.5	18952	20597.6	20564
E3 ubiquitin-protein ligase listerin OS=Homo sapiens OX=9606 GN=LTN1 PE=1 SV=2	LTN1	26.7	25	25.5	31.2	30.5	23.8	38.9	28.8	33.7	36.8
Inorganic pyrophosphatase OS=Homo sapiens OX=9606 GN=PPA1 PE=1 SV=2	PPA1	7986.3	10854.4	11263.2	8239.3	6740.8	10611.2	9858.2	9965.5	11609.5	10517.9
Nischarin OS=Homo sapiens OX=9606 GN=NISCH PE=1 SV=3	NISCH	27.9	62.7	41.4	46.7	36.7	50	52	46.7	50.2	40.2
mRNA-decapping enzyme 1A OS=Homo sapiens OX=9606 GN=DCP1A PE=1 SV=3	DCP1A	272.7	378.5	342.3	354.2	283.2	414.8	396.1	374.2	374.4	377.2
Tuftelin-interacting protein 11 OS=Homo sapiens OX=9606 GN=TFIP11 PE=1 SV=1	TFIP11	34.2	55.1	37.9	53.5	48.9	50.4	59.9	56.2	49.3	49.1
UPF0489 protein C5orf22 OS=Homo sapiens OX=9606 GN=C5orf22 PE=1 SV=2	C5orf22	27.2	19.5	33.6	32.2	29.9	36.1	37.9	35.4	35.9	34.2
Treacle protein (Fragment) OS=Homo sapiens OX=9606 GN=TCOF1 PE=1 SV=1	TCOF1	637.1	901.2	775.1	992.1	835.2	978.1	979.1	1016.5	914.7	964.2
Segment polarity protein dishevelled homolog DVL-2 OS=Homo sapiens OX=9606 GN=DVL2 PE=1 SV=1	DVL2	28.1	37.5	29.5	43.3	25.6	37.3	39.6	36.5	31	36.8
Sodium/potassium-transporting ATPase subunit beta-1 OS=Homo sapiens OX=9606 GN=ATP1B1 PE=1 SV=1	ATP1B1	170	227	192.4	193.3	196.8	207.5	246.8	232.3	224.6	236
Programmed cell death protein 2-like OS=Homo sapiens OX=9606 GN=PDCD2L PE=1 SV=1	PDCD2L	105.9	124.6	120.9	119.5	106.5	137.3	136.5	125.6	126.4	135.8
Glyceraldehyde-3-phosphate dehydrogenase OS=Homo sapiens OX=9606 GN=GAPDH PE=1 SV=3	GAPDH	36410.4	40242.6	41016.9	38860.2	32241	47871.5	43684.6	42993.8	42612.2	42900.5
Putative GTP-binding protein 6 OS=Homo sapiens OX=9606 GN=GTPBP6 PE=2 SV=4	GTPBP6	20.7	21.7	28.4	33.2	27.5	23.4	31.6	32	37	29.8
High mobility group protein 20A OS=Homo sapiens OX=9606 GN=HMG20A PE=1 SV=1	HMG20A	27.3	38.5	36.1	42.5	30.8	43.1	41.8	33.4	41.7	40.2
Histone H1.0 OS=Homo sapiens OX=9606 GN=H1-0 PE=1 SV=3	H1-0	42.3	65.1	40.7	103	36.2	59.6	45.9	81.9	56.2	43.9
WD repeat domain 55, isoform CRA_b OS=Homo sapiens OX=9606 GN=WDR55 PE=1 SV=1	WDR55	84.2	86.9	109.5	63.7	62.4	90.1	94.3	98.2	107.3	103.8
Kinetochore-associated protein 1 OS=Homo sapiens OX=9606 GN=KNTC1 PE=1 SV=1	KNTC1	19.7	24.3	20.6	32.4	23.1	26.1	34.7	30.4	18.3	21.2
Induced myeloid leukemia cell differentiation protein Mcl-1 OS=Homo sapiens OX=9606 GN=MCL1 PE=1 SV=3	MCL1	18.2	26.2	19.5	25.3	20.6	24.1	27.3	27	27.5	22.1
GTPase Era, mitochondrial OS=Homo sapiens OX=9606 GN=ERAL1 PE=1 SV=2	ERAL1	53.1	94.9	70.4	84.8	84.4	73.1	89.8	99.4	89.4	84.3
EKC/KEOPS complex subunit LAGE3 OS=Homo sapiens OX=9606 GN=LAGE3 PE=1 SV=2	LAGE3	169	199.1	174.7	226.9	182	214.8	243	232.4	222.5	220.5
THO complex subunit 3 OS=Homo sapiens OX=9606 GN=THOC3 PE=1 SV=1	THOC3	1159.2	1644.8	1469.3	1481.1	1139.6	1704	1485	1653	1555	1531
Pyruvate dehydrogenase E1 component subunit beta, mitochondrial OS=Homo sapiens OX=9606 GN=PDHB PE=1 SV=3	PDHB	1575.5	1878.2	2028.3	1724.1	1671.8	2226.4	2034.7	1976	2075.1	1967.4
Cyclin-dependent kinase 12 OS=Homo sapiens OX=9606 GN=CDK12 PE=1 SV=2	CDK12	241	396.7	304	362.3	347.8	318.9	440.3	392.3	378.2	378.5
Cyclin-dependent kinase 2 OS=Homo sapiens OX=9606 GN=CDK2 PE=1 SV=2	CDK2	879.5	1194.6	948.9	1232.3	966.9	1164	1319.1	1311.1	1168.8	1165.7
DNA replication licensing factor MCM5 OS=Homo sapiens OX=9606 GN=MCM5 PE=1 SV=5	MCM5	1015.9	1513.7	1123.3	1445.8	1299.3	1345.2	1819.7	1734.8	1449.2	1437.9
Zinc finger protein 347 OS=Homo sapiens OX=9606 GN=ZNF347 PE=4 SV=1	ZNF347	232.1	335.4	256.6	337.7	204.1	309	315.6	288.2	333.9	306.9
Tax1-binding protein 3 OS=Homo sapiens OX=9606 GN=TAX1BP3 PE=1 SV=2	TAX1BP3	253.4	426.6	446.7	267.5	228.4	335.1	272.4	343.5	398.1	426.4
Ras GTPase-activating-like protein IQGAP1 OS=Homo sapiens OX=9606 GN=IQGAP1 PE=1 SV=1	IQGAP1	5659	7661.1	6556.8	7917.3	6811.5	6917.1	8877.1	8342.1	8333.2	8139.3
SH3 domain-binding glutamic acid-rich-like protein OS=Homo sapiens OX=9606 GN=SH3BGRL PE=1 SV=1	SH3BGRL	819.4	1027.9	1083.1	905.9	689.8	1083.5	977.3	1115.3	1256.2	1253.3
RNA-binding protein Musashi homolog 2 OS=Homo sapiens OX=9606 GN=MSI2 PE=1 SV=1	MSI2	642.9	944.9	1076.1	771.8	653.7	849.7	736.1	862.2	984.5	1055.2
Cytoplasmic protein NCK1 (Fragment) OS=Homo sapiens OX=9606 GN=NCK1 PE=1 SV=1	NCK1	56.1	70	72.4	69.5	51.7	74.2	72.1	63.2	93.2	72.8
Elongation factor Tu, mitochondrial OS=Homo sapiens OX=9606 GN=TUFM PE=1 SV=2	TUFM	8092.4	10897.6	10159.7	11061.6	10056	11865.8	11792.9	12010.1	11413.6	11335.4
Nuclear receptor corepressor 1 OS=Homo sapiens OX=9606 GN=NCOR1 PE=1 SV=2	NCOR1	98.8	127.8	111.1	156.8	106.2	139.8	126.3	126.8	127.5	128.5
FGGY_N domain-containing protein OS=Homo sapiens OX=9606 PE=1 SV=1	1	341.8	393.4	351.7	396	344.3	415.6	425.5	421.3	416.2	427.2
tRNA pseudouridine synthase A (Fragment) OS=Homo sapiens OX=9606 GN=PUS1 PE=1 SV=1	PUS1	37.4	63.6	51.1	60.7	59.1	57.9	67.6	78.9	63.8	67.3
HAUS augmin-like complex subunit 3 OS=Homo sapiens OX=9606 GN=HAUS3 PE=1 SV=1	HAUS3	55.3	59.9	52	61	46.7	66.7	65.7	57.5	67.5	56.4
Cancer-related nucleoside-triphosphatase OS=Homo sapiens OX=9606 GN=NTPCR PE=1 SV=1	NTPCR	391.6	474.2	541.7	415.3	373.7	517.2	506.4	523.8	560.3	514.2
Small nuclear ribonucleoprotein-associated proteins B and B' OS=Homo sapiens OX=9606 GN=SNRPB PE=1 SV=2	SNRPB	2651.1	3460	3305.6	3124.5	2850	3766	3736.5	3626.6	3702.4	3434.3
Serine/arginine-rich splicing factor 2 (Fragment) OS=Homo sapiens OX=9606 GN=SRSF2 PE=1 SV=8	SRSF2	896.8	1427	1300.6	1105.4	845.3	1183.2	962.6	1201.2	1251	1332.2
Fatty acid-binding protein 5 OS=Homo sapiens OX=9606 GN=FABP5 PE=1 SV=3	FABP5	1021.1	1206.5	1286.9	1093.8	862.1	1337.8	1302.8	1227.1	1383.2	1158.9
Endophilin-A2 OS=Homo sapiens OX=9606 GN=SH3GL1 PE=1 SV=1	SH3GL1	983.4	1232.4	1210.9	1142.8	872.3	1297.5	1171.6	1186	1361.5	1256.7
Secernin-2 OS=Homo sapiens OX=9606 GN=SCRN2 PE=1 SV=1	SCRN2	97.5	133.2	113.9	149.2	105.8	134.3	132.5	140.5	123.2	127.7
Cytochrome b-c1 complex subunit Rieske, mitochondrial OS=Homo sapiens OX=9606 GN=UQCRFS1 PE=1 SV=2	UQCRFS1	310.5	480.6	459.3	407	353.5	409.6	394.3	384.3	434	464.9
Mitochondrial-processing peptidase subunit alpha OS=Homo sapiens OX=9606 GN=PMPCA PE=1 SV=2	PMPCA	1289	1769.2	1552.2	1767.3	1622.9	1930.2	1907.8	1965.1	1789.4	1818.5
28S ribosomal protein S26, mitochondrial OS=Homo sapiens OX=9606 GN=MRPS26 PE=1 SV=1	MRPS26	278.3	392.5	307.9	376.8	377.3	303.1	423.4	384.9	395.3	405.4
Serine/threonine-protein phosphatase 4 regulatory subunit 2 OS=Homo sapiens OX=9606 GN=PPP4R2 PE=1 SV=3	PPP4R2	164.1	174.1	187.9	189.5	148	194.9	211.3	192.7	226.2	178.4
Eukaryotic translation initiation factor 4E OS=Homo sapiens OX=9606 GN=EIF4E PE=1 SV=1	EIF4E	943	1151.3	1088.8	1211.5	1030.8	1204.1	1356.3	1216.8	1299	1242.5
Protein NipSnap homolog 1 OS=Homo sapiens OX=9606 GN=NIPSNAP1 PE=1 SV=1	NIPSNAP1	225.7	368	294.8	338.7	339.2	326.2	396.8	400.6	354.2	389.1
Trifunctional enzyme subunit beta, mitochondrial OS=Homo sapiens OX=9606 GN=HADHB PE=1 SV=3	HADHB	2960	4205.1	3972.3	3892.4	3796.5	4064.3	4508.6	4445.3	4550.5	4259.3
DUF3456 domain-containing protein (Fragment) OS=Homo sapiens OX=9606 PE=1 SV=1	1	2212.8	2848.3	2830.2	2731.3	2417.8	3025.3	2631	2807.9	2924.1	2914
MICOS complex subunit MIC13 OS=Homo sapiens OX=9606 GN=MICOS13 PE=1 SV=1	MICOS13	154.6	184.7	191.5	183.8	179.3	203.5	221	212.5	215.4	204.8
U3 small nucleolar RNA-associated protein 6 homolog OS=Homo sapiens OX=9606 GN=UTP6 PE=2 SV=2	UTP6	59.7	111.9	86.5	103.8	101.7	88.8	112.4	104.3	108.8	94.3
Malate dehydrogenase, cytoplasmic OS=Homo sapiens OX=9606 GN=MDH1 PE=1 SV=1	MDH1	4266.2	4742.5	4675.1	4933.8	4105.1	5119.1	5283.8	5227.2	4907.2	5324.6
Molybdopterin synthase sulfur carrier subunit OS=Homo sapiens OX=9606 GN=MOCS2 PE=1 SV=1	MOCS2	212.8	302.6	273.2	267.7	204.5	292.4	281	272.2	280.4	257.7
Dual specificity mitogen-activated protein kinase kinase 7 OS=Homo sapiens OX=9606 GN=MAP2K7 PE=1 SV=2	MAP2K7	184.1	322.6	200.1	325.6	245.6	255.4	301.6	316.7	246.4	295.6
Nucleolar complex protein 2 homolog OS=Homo sapiens OX=9606 GN=NOC2L PE=1 SV=4	NOC2L	1284.8	1853.6	1537	1945	1826	1700.7	1997.8	1909.6	1819.3	1774.1
Transcription and mRNA export factor ENY2 OS=Homo sapiens OX=9606 GN=ENY2 PE=1 SV=1	ENY2	1095.4	1565.6	1529.3	1338.4	1043.8	1442	1310.8	1354.5	1480.2	1355.2
Gephyrin OS=Homo sapiens OX=9606 GN=GPHN PE=1 SV=1	GPHN	255	357.1	313.7	361.2	245.6	368.4	365.2	350.6	355	323.5
Nucleoside diphosphate kinase OS=Homo sapiens OX=9606 GN=NME4 PE=1 SV=1	NME4	179.9	267.7	238.2	253.3	210.4	281.3	276.1	294.9	265.5	249.5
Integrator complex subunit 3 OS=Homo sapiens OX=9606 GN=INTS3 PE=1 SV=1	INTS3	317.8	474.6	380	485.2	377.1	453.3	511.3	484.1	487.4	426.4
DnaJ homolog subfamily C member 8 OS=Homo sapiens OX=9606 GN=DNAJC8 PE=1 SV=2	DNAJC8	1644.5	2165.8	1917.6	2279.7	1656.8	2231.4	2160.8	2143.5	2102.9	2282
Caspase-2 OS=Homo sapiens OX=9606 GN=CASP2 PE=1 SV=2	CASP2	357.1	469.8	408.5	514.1	395.6	477.8	506	477.3	476.6	428.6
Translation initiation factor eIF-2B subunit delta OS=Homo sapiens OX=9606 GN=EIF2B4 PE=1 SV=1	EIF2B4	81.7	124.4	93.4	127	109.7	98.8	152.7	138.5	130.7	132
ATP synthase mitochondrial F1 complex assembly factor 1 OS=Homo sapiens OX=9606 GN=ATPAF1 PE=1 SV=1	ATPAF1	622.1	892	786.9	846.2	680.6	950.8	809.4	878.6	836.3	827.3
Septin-9 OS=Homo sapiens OX=9606 GN=SEPTIN9 PE=1 SV=2	SEPTIN9	1762.9	2306.4	2070.5	2323.8	1890.5	2527.3	2426.4	2464.8	2431.5	2274.7
Myb-binding protein 1A (Fragment) OS=Homo sapiens OX=9606 GN=MYBBP1A PE=1 SV=1	MYBBP1A	2873.1	5115	3472.9	4625.3	5392.9	3574.8	6181.8	6134.4	4843.1	5206.5
28S ribosomal protein S17, mitochondrial (Fragment) OS=Homo sapiens OX=9606 GN=MRPS17 PE=1 SV=1	MRPS17	264.5	353.4	360.9	335.5	426.3	317.7	461.6	403.2	403.1	398.5
Replication factor C subunit 1 OS=Homo sapiens OX=9606 GN=RFC1 PE=1 SV=4	RFC1	65.6	107.5	71	90.9	72.1	62.8	109.5	107.9	95.1	94.7
Probable cytosolic iron-sulfur protein assembly protein CIAO1 OS=Homo sapiens OX=9606 GN=CIAO1 PE=1 SV=1	CIAO1	644.3	695.3	733.4	815.7	657.5	783.5	858.7	761.7	917.1	791.1
Eukaryotic translation initiation factor 3 subunit D OS=Homo sapiens OX=9606 GN=EIF3D PE=1 SV=1	EIF3D	1509.7	2368.4	1886.4	2198.2	1983	1805.8	2609.8	2472.9	2300.1	2308.3
Zinc finger matrin-type protein 2 (Fragment) OS=Homo sapiens OX=9606 GN=ZMAT2 PE=1 SV=1	ZMAT2	181.1	255.8	239.3	274.1	181.6	280.6	277.8	246.9	286.6	214.2
NAD-dependent protein deacetylase sirtuin-2 (Fragment) OS=Homo sapiens OX=9606 GN=SIRT2 PE=1 SV=1	SIRT2	102.4	114.8	129.5	128.9	104.2	123.4	143.2	110.5	134.7	132.7
ATP5MF-PTCD1 readthrough OS=Homo sapiens OX=9606 GN=ATP5MF-PTCD1 PE=4 SV=1	ATP5MF-PTCD1	15.2	17.3	19.1	14	20	17.7	21.8	21.3	20.2	23.9
Nucleosome-remodeling factor subunit BPTF OS=Homo sapiens OX=9606 GN=BPTF PE=1 SV=1	BPTF	96.8	130.5	115.3	132.5	128.8	106	145.5	128.7	147.6	119.9
NFU1 iron-sulfur cluster scaffold homolog, mitochondrial (Fragment) OS=Homo sapiens OX=9606 GN=NFU1 PE=1 SV=1	NFU1	63.7	88	94.2	75.8	82	98.8	94.6	97.1	119.7	85.6
Discs, large homolog 3 (Neuroendocrine-dlg, Drosophila), isoform CRA_b OS=Homo sapiens OX=9606 GN=DLG3 PE=1 SV=1	DLG3	60.7	89.3	65	80	79.4	72.3	96	100.2	97.4	88.6
Protein transport protein Sec16A OS=Homo sapiens OX=9606 GN=SEC16A PE=1 SV=4	SEC16A	40.4	57.6	54.6	50.2	40.8	53	49.2	46.2	52.5	50.3
Trafficking protein particle complex subunit 13 OS=Homo sapiens OX=9606 GN=TRAPPC13 PE=1 SV=2	TRAPPC13	86.2	84.9	87.9	104.6	84.7	88.2	105.1	93.5	109.2	102.5
Lymphoid-specific helicase OS=Homo sapiens OX=9606 GN=HELLS PE=1 SV=1	HELLS	783.9	1294.7	988.5	1253.2	1075	1077.2	1390.3	1406.5	1196.5	1193.5
Uncharacterized protein OS=Homo sapiens OX=9606 PE=3 SV=1	3	592.7	797.3	791.4	775.9	576.1	806.7	697.4	775.5	810.1	804.9
Telomere length regulation protein TEL2 homolog OS=Homo sapiens OX=9606 GN=TELO2 PE=1 SV=2	TELO2	309.6	410.2	365.8	478	350	427.2	435	446	381	419.8
Vacuolar protein sorting-associated protein 26A OS=Homo sapiens OX=9606 GN=VPS26A PE=1 SV=2	VPS26A	604.6	728.7	629.9	808.7	658.6	792.2	957.2	837.5	800.6	780
Importin-9 OS=Homo sapiens OX=9606 GN=IPO9 PE=1 SV=3	IPO9	1693.2	2061.8	1895.1	2250.9	1780.2	2218.9	2253.5	2285	2193	2107.2
60S acidic ribosomal protein P1 OS=Homo sapiens OX=9606 GN=RPLP1 PE=1 SV=1	RPLP1	1662.8	2013.2	2522.9	1521.4	1343.8	2178	1947.1	2180.8	2458.4	2483.2
Cyclin-dependent kinases regulatory subunit 1 OS=Homo sapiens OX=9606 GN=CKS1B PE=1 SV=1	CKS1B	101.9	123.1	149.6	126.9	94.5	133.5	113.9	115.1	138.4	132.1
DET1- and DDB1-associated protein 1 OS=Homo sapiens OX=9606 GN=DDA1 PE=1 SV=1	DDA1	656.3	924.4	934.5	886.9	703	859.7	813.4	823.2	990.2	974.4
26S proteasome non-ATPase regulatory subunit 10 OS=Homo sapiens OX=9606 GN=PSMD10 PE=1 SV=1	PSMD10	602.6	690.9	663.6	730.6	563.2	767.6	740.9	725.7	779	718.6
Barrier-to-autointegration factor OS=Homo sapiens OX=9606 GN=BANF1 PE=1 SV=1	BANF1	1931.6	2600.1	3382.6	2337.3	1795.1	2527.4	2284.7	2409.9	2980.8	3281.8
Procollagen galactosyltransferase 1 OS=Homo sapiens OX=9606 GN=COLGALT1 PE=1 SV=1	COLGALT1	159.4	217.1	198.4	227.1	203.8	212	232.6	221.4	207.2	188.9
Arf-GAP domain and FG repeat-containing protein 1 OS=Homo sapiens OX=9606 GN=AGFG1 PE=1 SV=2	AGFG1	269.3	401.1	412.1	365	289.3	385.2	324.5	358.7	380.5	391.5
U3 small nucleolar ribonucleoprotein protein MPP10 OS=Homo sapiens OX=9606 GN=MPHOSPH10 PE=1 SV=2	MPHOSPH10	666.4	986	884.4	1002	966.2	872.4	1085.2	1046	1042.1	1040.7
Biogenesis of lysosome-related organelles complex 1 subunit 2 OS=Homo sapiens OX=9606 GN=BLOC1S2 PE=1 SV=1	BLOC1S2	72	82.5	83.5	83.3	74.4	95.5	78.1	85.3	86.8	98.5
HEAT repeat-containing protein 1 OS=Homo sapiens OX=9606 GN=HEATR1 PE=1 SV=3	HEATR1	1273.1	1687.7	1532.6	1824.9	1762.1	1666.3	2041.8	1960.9	1788.9	1800.1
Exosome complex exonuclease RRP44 OS=Homo sapiens OX=9606 GN=DIS3 PE=1 SV=2	DIS3	2224.8	3390.4	2651.8	3111	3001.7	2557.7	3928.7	3561.7	3241.3	3230.7
Tryptophan--tRNA ligase, cytoplasmic OS=Homo sapiens OX=9606 GN=WARS1 PE=1 SV=2	WARS1	2381.5	2986.8	2660.1	3189.7	2574.4	3117.5	3393.4	3279.5	3084.4	3007.2
Mitochondrial genome maintenance exonuclease 1 OS=Homo sapiens OX=9606 GN=MGME1 PE=1 SV=1	MGME1	84.8	123.3	109.5	119.4	107.5	132.4	117.9	121.8	131	123.8
Prohibitin-2 OS=Homo sapiens OX=9606 GN=PHB2 PE=1 SV=2	PHB2	6397.7	9687.6	8176.9	8663.6	8419.9	8371.2	9529.1	9515	9328.8	8843.5
Nucleolar complex protein 3 homolog OS=Homo sapiens OX=9606 GN=NOC3L PE=1 SV=1	NOC3L	1048.6	2101.9	1362.9	2014	1946.3	1396.6	2253.1	2252.4	1771.4	1804.9
Ubiquitin carboxyl-terminal hydrolase isozyme L1 OS=Homo sapiens OX=9606 GN=UCHL1 PE=1 SV=2	UCHL1	4966.3	5935.6	6942.8	4698.2	3959.4	6498.7	6026.5	6249.6	7071.5	6469
Pre-mRNA-splicing factor ISY1 homolog OS=Homo sapiens OX=9606 GN=ISY1 PE=1 SV=3	ISY1	128.2	175.6	205.3	158.7	141.4	167.7	152.4	168.4	198.6	184.3
Calreticulin OS=Homo sapiens OX=9606 GN=CALR PE=1 SV=1	CALR	1166.1	1406.8	1751.7	1236.6	1193.5	1525.3	1388.5	1383.1	1673.3	1431.4
Serine/threonine-protein kinase OSR1 OS=Homo sapiens OX=9606 GN=OXSR1 PE=1 SV=1	OXSR1	209.7	271.9	241.3	277	245	224.5	304.2	273.3	288.3	255.7
Leucyl-tRNA synthetase OS=Homo sapiens OX=9606 GN=LARS1 PE=1 SV=1	LARS1	2370.1	3603.1	2827.9	3634.5	3182	3161.8	3855	3865.2	3382.6	3308.5
Fatty acid synthase OS=Homo sapiens OX=9606 GN=FASN PE=1 SV=3	FASN	23692.2	28187.8	26309.5	30756	24740.3	30732.1	32752.1	30977	31298.4	29591.1
Complex III assembly factor LYRM7 OS=Homo sapiens OX=9606 GN=LYRM7 PE=1 SV=1	LYRM7	351.3	475.3	498.1	393.1	383.2	459.1	450.5	420.8	519.5	492.2
Fas apoptotic inhibitory molecule 1 OS=Homo sapiens OX=9606 GN=FAIM PE=1 SV=1	FAIM	270.7	428.8	318.4	449.5	280.2	413.3	332.8	353.7	318.5	340.1
Histone-lysine N-methyltransferase EHMT2 OS=Homo sapiens OX=9606 GN=EHMT2 PE=1 SV=1	EHMT2	13	15.3	12.8	18.4	16.7	17	19.7	17	17.5	17.9
WD repeat-containing protein 11 OS=Homo sapiens OX=9606 GN=WDR11 PE=1 SV=1	WDR11	51.9	73.8	64.3	59.7	53	67.8	79.8	61.7	102.9	63.1
Actin-related protein 2/3 complex subunit 5 OS=Homo sapiens OX=9606 GN=ARPC5 PE=1 SV=3	ARPC5	304.9	381.4	398.6	384.5	319.1	440.7	387.7	378.4	399.8	382.9
E3 ubiquitin-protein ligase KCMF1 OS=Homo sapiens OX=9606 GN=KCMF1 PE=1 SV=2	KCMF1	34.5	52.6	62.3	34.2	34.3	48.2	41.9	40.4	47.7	41
Beta-centractin OS=Homo sapiens OX=9606 GN=ACTR1B PE=1 SV=1	ACTR1B	20.3	25.9	22	29.5	18.6	25.5	27.7	25.1	24.7	25.1
BRCA2 and CDKN1A-interacting protein OS=Homo sapiens OX=9606 GN=BCCIP PE=1 SV=1	BCCIP	855.3	959.8	946.8	1075.1	852.8	1081.1	1158.7	1100.5	1112.7	1019.5
Tyrosine--tRNA ligase, cytoplasmic OS=Homo sapiens OX=9606 GN=YARS1 PE=1 SV=4	YARS1	5429.2	7036.4	6237.7	7345.8	5547.5	7106.2	7248.7	7200.7	6959.3	6629.8
Pre-mRNA-processing factor 17 OS=Homo sapiens OX=9606 GN=CDC40 PE=1 SV=1	CDC40	39.6	51.9	53	62	58.8	51.7	60.7	61.9	63.2	63.9
Guanine nucleotide binding protein-like 3 (Nucleolar)-like, isoform CRA_b OS=Homo sapiens OX=9606 GN=GNL3L PE=1 SV=1	GNL3L	77.1	126.1	99.3	106.4	116.7	78	134.8	118.3	112.5	100.5
Non-specific serine/threonine protein kinase OS=Homo sapiens OX=9606 GN=RPS6KA3 PE=1 SV=2	RPS6KA3	130.6	163.9	131.7	185.7	144.7	162.8	201.5	191.7	178	173
Set1/Ash2 histone methyltransferase complex subunit ASH2 OS=Homo sapiens OX=9606 GN=ASH2L PE=1 SV=1	ASH2L	325.4	422.8	395.1	499.6	402.4	415.3	452	454.2	473.8	480.9
N-acetyltransferase 5 (ARD1 homolog, S. cerevisiae), isoform CRA_a OS=Homo sapiens OX=9606 GN=NAA20 PE=1 SV=1	NAA20	53.7	86.8	65.5	74.4	62	74.1	83.4	78.2	70.2	74.1
Translation initiation factor eIF-2B subunit beta OS=Homo sapiens OX=9606 GN=EIF2B2 PE=1 SV=3	EIF2B2	1289.3	1706.3	1492	1788.1	1440.7	1706.8	1824.1	1733.9	1743.2	1695.3
Heterogeneous nuclear ribonucleoprotein H2 OS=Homo sapiens OX=9606 GN=HNRNPH2 PE=1 SV=1	HNRNPH2	997	1392.4	1645.3	1081.6	1008.8	1301.2	1136.5	1297.7	1508.5	1482.5
40S ribosomal protein S28 OS=Homo sapiens OX=9606 GN=RPS28 PE=1 SV=1	RPS28	355.5	495.9	405.6	527.9	351.3	470	406	449.4	446.9	504.3
COMM domain-containing protein 4 OS=Homo sapiens OX=9606 GN=COMMD4 PE=1 SV=1	COMMD4	8.2	10.3	10.2	14.9	7.9	10.7	17.1	11.2	11.9	13.7
E2F-associated phosphoprotein OS=Homo sapiens OX=9606 GN=EAPP PE=1 SV=1	EAPP	48.5	68.7	58.2	69.5	53.1	72	63.4	64.5	65.4	74.7
Ubiquitin-protein ligase E3A OS=Homo sapiens OX=9606 GN=UBE3A PE=4 SV=1	UBE3A	53.3	70.8	66.9	89.3	60	70.6	75.6	73.4	72.7	74.9
SAFB-like transcription modulator (Fragment) OS=Homo sapiens OX=9606 GN=SLTM PE=1 SV=1	SLTM	218.2	322.2	258	310.5	313.6	242.1	344	285.9	329.7	296.8
Tetraspanin-3 OS=Homo sapiens OX=9606 GN=TSPAN3 PE=2 SV=1	TSPAN3	59.6	74.5	72.2	77.7	58.5	78.3	74.3	73	82.6	69.8
Cullin-4B OS=Homo sapiens OX=9606 GN=CUL4B PE=1 SV=1	CUL4B	1761.3	2426.6	1967.9	2336.8	2212	2205.3	2657.2	2531	2426.1	2336.3
Coagulation factor VII OS=Homo sapiens OX=9606 GN=F7 PE=1 SV=1	F7	281.5	435	386.2	321.1	391.4	361.3	470.8	427.9	445	439.6
NCK-interacting protein with SH3 domain OS=Homo sapiens OX=9606 GN=NCKIPSD PE=1 SV=1	NCKIPSD	52.2	72.9	44.8	83.7	62.3	69	74.8	73.4	62.1	74.3
Histone H3.1t OS=Homo sapiens OX=9606 GN=H3-4 PE=1 SV=3	H3-4	425.2	487.7	476.7	546.7	445.1	459.4	520.5	593.7	455.5	553.6
PRKC apoptosis WT1 regulator protein OS=Homo sapiens OX=9606 GN=PAWR PE=1 SV=1	PAWR	691.7	846.6	794.2	955.9	689.2	926.1	903.2	887.6	920.9	805
Leukotriene A-4 hydrolase OS=Homo sapiens OX=9606 GN=LTA4H PE=1 SV=2	LTA4H	5270.8	6478.4	5930	6883.4	5323	6711.3	7070.6	6776.5	6692.1	6348.6
Ubiquitin carboxyl-terminal hydrolase isozyme L3 OS=Homo sapiens OX=9606 GN=UCHL3 PE=1 SV=1	UCHL3	1750.8	2159.4	2148.2	1833.1	1513.6	2282.1	2148.6	2175.7	2344	2179.5
RNA transcription, translation and transport factor protein OS=Homo sapiens OX=9606 GN=RTRAF PE=1 SV=1	RTRAF	7200.2	9199.4	8431.9	9168.7	7107.2	9621.3	9446.6	9335.8	9509.5	8808.8
Ubiquitin-conjugating enzyme E2 B OS=Homo sapiens OX=9606 GN=UBE2B PE=1 SV=1	UBE2B	63.4	79.5	90.6	64.3	49.9	82.6	71.4	83	96.1	91.8
Lys-63-specific deubiquitinase OS=Homo sapiens OX=9606 GN=BRCC3 PE=1 SV=2	BRCC3	395.4	501.5	441.8	570.5	428.3	520.2	534.7	514.1	519.9	498.6
WD repeat-containing protein 5 OS=Homo sapiens OX=9606 GN=WDR5 PE=1 SV=1	WDR5	496.2	689.1	604.6	697.9	572.7	656.6	723.8	669.6	709.9	721.1
CCR4-NOT transcription complex subunit 10 OS=Homo sapiens OX=9606 GN=CNOT10 PE=1 SV=1	CNOT10	34.1	53.3	37.1	55	43.3	48.4	56.8	48.1	52.1	41.3
General transcription factor 3C polypeptide 2 OS=Homo sapiens OX=9606 GN=GTF3C2 PE=1 SV=2	GTF3C2	89.6	149	112.6	160.1	146	116.7	164.2	157.1	134.8	139.4
Leucine-rich PPR motif-containing protein, mitochondrial OS=Homo sapiens OX=9606 GN=LRPPRC PE=1 SV=3	LRPPRC	14780.2	19726.1	18769.5	19358.7	18157.2	20105.1	21015.3	20184.2	20266	19186.7
DDRGK domain-containing protein 1 OS=Homo sapiens OX=9606 GN=DDRGK1 PE=1 SV=2	DDRGK1	67.9	132.9	102.3	78.4	107.4	88.4	144.4	111.3	134.5	119.5
Eukaryotic translation initiation factor 5 OS=Homo sapiens OX=9606 GN=EIF5 PE=1 SV=2	EIF5	1837.2	2414.3	2111.3	2457.1	2070.8	2225.5	2811.5	2506.5	2545.6	2387.2
Aldehyde dehydrogenase X, mitochondrial OS=Homo sapiens OX=9606 GN=ALDH1B1 PE=1 SV=3	ALDH1B1	413.2	506	499	533.5	443.2	557.1	537	551.8	588.5	501.9
V-type proton ATPase subunit B, brain isoform OS=Homo sapiens OX=9606 GN=ATP6V1B2 PE=1 SV=3	ATP6V1B2	2519.5	3080.9	3106.7	3216.2	2640	3480.9	3282.4	3261	3321.2	3196.1
Calcineurin subunit B type 1 OS=Homo sapiens OX=9606 GN=PPP3R1 PE=1 SV=1	PPP3R1	668.4	878.4	951.2	732.8	602.3	870	894.8	835.1	964.3	858.2
Nucleoporin p54 OS=Homo sapiens OX=9606 GN=NUP54 PE=1 SV=2	NUP54	1261.2	1450.3	1576.7	1494.2	1346.9	1642.3	1606.6	1458.6	1709.2	1504.6
E3 ubiquitin-protein ligase UHRF1 OS=Homo sapiens OX=9606 GN=UHRF1 PE=1 SV=1	UHRF1	52.9	72	59.5	68.2	72.5	59.5	76.6	82.6	57.7	89.3
Oxysterol-binding protein-related protein 9 OS=Homo sapiens OX=9606 GN=OSBPL9 PE=1 SV=2	OSBPL9	207.5	303.1	217.7	327.9	235.1	275.4	283.2	297.3	236.1	279.8
Palmitoyl-protein thioesterase ABHD10, mitochondrial OS=Homo sapiens OX=9606 GN=ABHD10 PE=1 SV=1	ABHD10	189.4	287.8	244.6	272.3	281.8	251.8	304.9	304.5	281.8	263
THO complex subunit 6 homolog OS=Homo sapiens OX=9606 GN=THOC6 PE=1 SV=1	THOC6	244	253.8	302.1	307.9	280.6	331.2	297.1	297.3	318.8	290.5
1-phosphatidylinositol 4,5-bisphosphate phosphodiesterase gamma-1 OS=Homo sapiens OX=9606 GN=PLCG1 PE=1 SV=1	PLCG1	83.9	87.1	72.8	92.9	96.6	77.3	111.5	96	96.2	86.6
Lamin-B1 OS=Homo sapiens OX=9606 GN=LMNB1 PE=1 SV=2	LMNB1	12258.8	17255.3	16480	15228	14957.5	18195.8	17374.8	17682.7	18283.9	17797.9
Alpha-globin transcription factor CP2 OS=Homo sapiens OX=9606 GN=TFCP2 PE=1 SV=2	TFCP2	54.4	51.7	56	58.9	49.9	60.7	64.3	55.5	62.4	59.4
Histone H4 OS=Homo sapiens OX=9606 GN=H4C1 PE=1 SV=2	H4C1	6258.4	7135.3	8198.9	7676.8	6877.7	7748	8145.3	9954.4	7363.6	8174.4
Alpha-actinin-1 OS=Homo sapiens OX=9606 GN=ACTN1 PE=1 SV=2	ACTN1	3325.2	4182.4	3824.4	4496.1	3435.3	4560.3	4445.1	4198.1	4582.4	4083.3
DNA polymerase delta subunit 2 OS=Homo sapiens OX=9606 GN=POLD2 PE=1 SV=1	POLD2	437.4	566.4	515.6	589.1	482.6	580.4	590.6	573.7	597.6	573.5
Adenylosuccinate synthetase isozyme 2 OS=Homo sapiens OX=9606 GN=ADSS2 PE=1 SV=3	ADSS2	2217.6	2703.3	2529.4	2860.5	2266	2856.6	3007	2791.6	2894.1	2817.2
Dynein assembly factor 5, axonemal OS=Homo sapiens OX=9606 GN=DNAAF5 PE=1 SV=4	DNAAF5	636.5	761.1	746.9	821.6	698.8	792.2	907.5	851.3	850.1	823
Cytochrome b-c1 complex subunit 9 OS=Homo sapiens OX=9606 GN=UQCR10 PE=1 SV=3	UQCR10	518.5	809.4	712.7	577.1	737.8	591.9	869.2	786.1	824.5	806.6
Geminin (Fragment) OS=Homo sapiens OX=9606 GN=GMNN PE=1 SV=1	GMNN	273.4	392.4	279.6	396.9	262.5	355	280.6	319.1	281.6	312.6
Complex I-PDSW OS=Homo sapiens OX=9606 GN=NDUFB10 PE=1 SV=1	NDUFB10	93.8	130.2	154.7	106.4	124.6	123.7	138.4	118	146.9	124.4
Serine protease HTRA2, mitochondrial OS=Homo sapiens OX=9606 GN=HTRA2 PE=1 SV=2	HTRA2	597.3	828.2	817	812.8	671.7	848.6	777.4	851.6	839.3	837.2
4-trimethylaminobutyraldehyde dehydrogenase OS=Homo sapiens OX=9606 GN=ALDH9A1 PE=1 SV=3	ALDH9A1	1740	2226.7	2033.9	2295.9	1789.1	2362.5	2274.3	2243.2	2230.8	2184.1
Reticulocalbin-2 OS=Homo sapiens OX=9606 GN=RCN2 PE=1 SV=1	RCN2	1886.2	2476.2	2380.1	2577.8	2128.4	2722.1	2431.5	2544.8	2694.8	2526.5
Zinc finger protein 281 OS=Homo sapiens OX=9606 GN=ZNF281 PE=1 SV=1	ZNF281	58.7	57.4	76.8	74.5	61.8	70.4	79.4	78.7	96.5	73.4
Queuosine salvage protein OS=Homo sapiens OX=9606 GN=C9orf64 PE=1 SV=1	C9orf64	48.9	66.2	59.1	75.7	59.9	62.8	65.7	67.5	78.2	73.1
Protein LSM14 homolog B OS=Homo sapiens OX=9606 GN=LSM14B PE=1 SV=1	LSM14B	68	71.6	74.8	80.5	68.2	69.6	84.8	80.9	85.4	81
DNA replication licensing factor MCM3 OS=Homo sapiens OX=9606 GN=MCM3 PE=1 SV=3	MCM3	8883.3	11275.7	9657.3	11854.4	10219.1	11532.2	13536.6	12447.9	11864.2	11561.8
Periodic tryptophan protein 1 homolog OS=Homo sapiens OX=9606 GN=PWP1 PE=1 SV=1	PWP1	392.6	482.1	471.7	592.5	453.2	547.3	525.9	519.6	534.7	521.5
Aladin OS=Homo sapiens OX=9606 GN=AAAS PE=1 SV=1	AAAS	26.8	27.9	24.6	37.7	33.8	25.6	39.5	36.2	38.9	37.5
Tubulin beta chain OS=Homo sapiens OX=9606 GN=TUBB PE=1 SV=2	TUBB	1994.4	2496.6	2584.2	2549.5	2028.9	2619.6	2483	2591.1	2630.5	2553.6
Pumilio homolog 3 OS=Homo sapiens OX=9606 GN=PUM3 PE=1 SV=3	PUM3	36.5	51.1	41.4	50.1	46	43.7	64.9	59.8	51.7	49.4
SCY1-like protein 2 OS=Homo sapiens OX=9606 GN=SCYL2 PE=1 SV=1	SCYL2	138.5	177	178.3	183.7	150.1	179.6	192.1	185.9	193.5	171.3
60S ribosomal export protein NMD3 OS=Homo sapiens OX=9606 GN=NMD3 PE=1 SV=1	NMD3	43.1	51.4	49.5	56.6	55.5	47.3	72.5	65.4	58.4	59.1
Eukaryotic translation initiation factor 4 gamma 1 OS=Homo sapiens OX=9606 GN=EIF4G1 PE=1 SV=4	EIF4G1	11430	13823.2	12747.7	15298.7	11645.3	15080.7	14930.2	14030.4	14143.2	13803.3
Mitochondrial import receptor subunit TOM34 OS=Homo sapiens OX=9606 GN=TOMM34 PE=1 SV=2	TOMM34	614	740	769.7	716.9	664.5	787.8	898	799.4	917.5	787.8
WD repeat-containing protein 89 (Fragment) OS=Homo sapiens OX=9606 GN=WDR89 PE=1 SV=1	WDR89	16.9	22.8	19.1	23.6	20.7	21.9	26.2	28.6	23	21.9
Thioredoxin domain-containing protein 5 OS=Homo sapiens OX=9606 GN=TXNDC5 PE=1 SV=2	TXNDC5	2660.5	3656.8	4280.7	2545.7	2354.6	3446.2	2971.1	3344.3	3872.2	3653.1
39S ribosomal protein L24, mitochondrial (Fragment) OS=Homo sapiens OX=9606 GN=MRPL24 PE=1 SV=1	MRPL24	79.1	123.3	95.6	118.8	118.1	102.4	147.8	131.9	121.9	124.7
Serine/threonine-protein phosphatase PP1-gamma catalytic subunit OS=Homo sapiens OX=9606 GN=PPP1CC PE=1 SV=1	PPP1CC	30.6	33.3	37.3	39.6	33	39.6	43.6	43.2	36.7	28.3
Serine/threonine-protein phosphatase 2A 55 kDa regulatory subunit B alpha isoform OS=Homo sapiens OX=9606 GN=PPP2R2A PE=1 SV=1	PPP2R2A	1074.2	1451.3	1186.8	1491.8	1225.3	1391.5	1551.9	1527.6	1491.1	1422.5
Splicing factor 3A subunit 2 OS=Homo sapiens OX=9606 GN=SF3A2 PE=1 SV=2	SF3A2	867.8	1280.8	1111.5	1123.9	1082.2	1141.2	1284	1294.5	1158.3	1231.1
Diablo homolog, mitochondrial OS=Homo sapiens OX=9606 GN=DIABLO PE=1 SV=1	DIABLO	489.6	588.6	570.8	613	523.8	638.5	612.8	602.9	631.8	634.8
Dual specificity mitogen-activated protein kinase kinase 1 OS=Homo sapiens OX=9606 GN=MAP2K1 PE=1 SV=2	MAP2K1	464.8	717.5	512.5	722.1	558.7	604.5	704.4	706.5	645.8	662.1
Density-regulated protein OS=Homo sapiens OX=9606 GN=DENR PE=1 SV=2	DENR	443.7	523.8	518.8	547.3	442.3	532.4	612.5	542	588	524
Ribonuclease P protein subunit p25 OS=Homo sapiens OX=9606 GN=RPP25 PE=1 SV=1	RPP25	139.7	172.1	179.2	177.2	143.8	180.7	181.8	178.3	199.8	185.8
39S ribosomal protein L50, mitochondrial OS=Homo sapiens OX=9606 GN=MRPL50 PE=1 SV=2	MRPL50	237.6	421.2	507.5	364.4	297.4	335	269.6	320.8	375	474.7
Pyridoxal kinase OS=Homo sapiens OX=9606 GN=PDXK PE=1 SV=1	PDXK	515.7	551.6	616.2	693.2	520.8	678.5	659.3	626	628.8	616.2
Tubulin beta chain OS=Homo sapiens OX=9606 GN=TUBB PE=1 SV=1	TUBB	879.4	1155	1183.4	1158.7	960.5	1167.4	1110.9	1159.6	1206.9	1136.2
Translational activator of cytochrome c oxidase 1 OS=Homo sapiens OX=9606 GN=TACO1 PE=1 SV=1	TACO1	287.7	375.8	366	334.2	327.1	350.4	408.4	378.4	367.3	387
40S ribosomal protein S18 OS=Homo sapiens OX=9606 GN=RPS18 PE=1 SV=3	RPS18	611.9	1010.4	737.7	953	995.8	658.8	1181	1036.2	981.3	928.1
Acidic leucine-rich nuclear phosphoprotein 32 family member B OS=Homo sapiens OX=9606 GN=ANP32B PE=1 SV=1	ANP32B	2546.2	2862.8	3291.7	3000.1	2347.7	3293.4	3005.1	3195.6	3478.3	3364.4
Tight junction protein ZO-1 OS=Homo sapiens OX=9606 GN=TJP1 PE=1 SV=1	TJP1	492.6	618.5	570.1	615.4	554.3	637.2	674.6	600.6	649.2	620.5
Inosine-5'-monophosphate dehydrogenase 2 (Fragment) OS=Homo sapiens OX=9606 GN=IMPDH2 PE=1 SV=1	IMPDH2	8231.3	9655.4	9659.1	9607.5	7802.9	10650.2	10106.1	9869.3	10377.3	9700
Signal sequence receptor subunit gamma OS=Homo sapiens OX=9606 GN=SSR3 PE=1 SV=1	SSR3	13.4	20.3	13.4	5.8	12.5	8.5	18.2	14.7	12.9	19.1
PDZ and LIM domain protein 1 OS=Homo sapiens OX=9606 GN=PDLIM1 PE=1 SV=4	PDLIM1	1417.2	2084.2	1835.3	1949.9	1374	2089.6	1805.9	1971.2	2004.6	1964.1
Arginine and glutamate-rich protein 1 OS=Homo sapiens OX=9606 GN=ARGLU1 PE=1 SV=1	ARGLU1	84.1	109.1	93.9	129	107.6	108.7	122.1	120.9	122.4	111.1
Splicing factor 3B subunit 2 OS=Homo sapiens OX=9606 GN=SF3B2 PE=1 SV=2	SF3B2	6708.1	10479.2	9749.8	9091.5	7777.4	8665.1	9008	9585.8	9882.7	9715.9
Ribosome biogenesis protein WDR12 OS=Homo sapiens OX=9606 GN=WDR12 PE=1 SV=2	WDR12	2293	3059.3	2661.5	3153	2593.8	3115.2	3236.4	2995.3	3081.6	2825.9
Geranylgeranyl transferase type-2 subunit alpha OS=Homo sapiens OX=9606 GN=RABGGTA PE=1 SV=2	RABGGTA	149.3	172.8	167.4	208.4	141.8	175.3	194	183.7	181.3	169.7
V-type proton ATPase subunit OS=Homo sapiens OX=9606 GN=ATP6V0D1 PE=1 SV=1	ATP6V0D1	462	594.9	568.6	688.1	553.1	629.4	633.3	624.3	617.1	628.9
Nuclear ubiquitous casein and cyclin-dependent kinase substrate 1 OS=Homo sapiens OX=9606 GN=NUCKS1 PE=1 SV=1	NUCKS1	1183.2	1351.4	1322.7	1558.7	1168	1529.1	1546.6	1373.9	1540.5	1412.3
UDP-N-acetylglucosamine--peptide N-acetylglucosaminyltransferase 110 kDa subunit OS=Homo sapiens OX=9606 GN=OGT PE=1 SV=3	OGT	562.2	716.6	635	776.4	673.4	716	825.7	742.4	798.3	736.4
Protein-serine/threonine phosphatase (Fragment) OS=Homo sapiens OX=9606 GN=PPM1B PE=1 SV=1	PPM1B	158.1	192.6	173.8	180.9	151.7	189.8	188	195.9	186.1	185.4
Anaphase-promoting complex subunit CDC26 OS=Homo sapiens OX=9606 GN=CDC26 PE=1 SV=1	CDC26	331.7	421.8	400.9	462.5	350.9	456.7	436.8	439.4	440.6	417.5
Deoxyhypusine hydroxylase OS=Homo sapiens OX=9606 GN=DOHH PE=1 SV=1	DOHH	94.8	116.7	128	99.5	89.7	122.4	114.9	118.9	144.4	123.1
Sorting nexin-3 OS=Homo sapiens OX=9606 GN=SNX3 PE=1 SV=3	SNX3	318.7	459.4	560.9	402.3	294.9	411.2	398.6	416	483.3	540.2
Protein CUSTOS OS=Homo sapiens OX=9606 GN=C12orf43 PE=1 SV=2	C12orf43	22.2	40.9	27.3	29.5	25.8	30.8	36.3	30.1	30.3	22
NADH-ubiquinone oxidoreductase 75 kDa subunit, mitochondrial OS=Homo sapiens OX=9606 GN=NDUFS1 PE=1 SV=3	NDUFS1	1326.8	1550.2	1691.2	1634.1	1444.8	1818.2	1636.9	1658.3	1725.5	1645.6
Alpha-aminoadipic semialdehyde dehydrogenase OS=Homo sapiens OX=9606 GN=ALDH7A1 PE=1 SV=1	ALDH7A1	4779.5	5862.8	5376.3	6176.9	4721.9	6388.6	5877.9	5891.6	5906.3	5654.9
RNA helicase aquarius OS=Homo sapiens OX=9606 GN=AQR PE=1 SV=4	AQR	306.2	446.1	353.9	443.6	402.8	410.9	466.9	452.8	455.6	412.9
Enoyl-CoA hydratase OS=Homo sapiens OX=9606 GN=HADHA PE=1 SV=2	HADHA	4498.5	6728.9	6046.1	6485.7	5865.6	6334.2	6609.6	6663	6653.4	6294.1
Protein FAM114A2 OS=Homo sapiens OX=9606 GN=FAM114A2 PE=1 SV=4	FAM114A2	187.2	227.9	215.9	260.1	201.5	273.9	272.8	236.5	254.7	232.8
Protein IWS1 homolog OS=Homo sapiens OX=9606 GN=IWS1 PE=1 SV=2	IWS1	437.8	532.5	556.2	546.3	453.4	564.5	508.1	498.3	570.1	539.8
RNA-binding protein fox-1 homolog 1 OS=Homo sapiens OX=9606 GN=RBFOX1 PE=4 SV=1	RBFOX1	68.8	103.7	93.2	84.7	72.3	88.7	80.4	94.5	90.8	95.3
ATP synthase subunit beta, mitochondrial OS=Homo sapiens OX=9606 GN=ATP5F1B PE=1 SV=3	ATP5F1B	13850.7	16078.1	17012.3	16903.8	15577.4	18506.8	17046.9	16983.2	17321.9	17015.3
Cytochrome b-c1 complex subunit 6, mitochondrial OS=Homo sapiens OX=9606 GN=UQCRH PE=1 SV=2	UQCRH	1084.5	1489.3	1359.8	1383.9	1198.4	1396.8	1379.9	1389.3	1460.9	1499.5
Golgi membrane protein 1 OS=Homo sapiens OX=9606 GN=GOLM1 PE=1 SV=1	GOLM1	211	279.9	267.1	253.7	241.6	271.7	293.9	247	302.7	294.3
Glutathione S-transferase LANCL1 (Fragment) OS=Homo sapiens OX=9606 GN=LANCL1 PE=1 SV=1	LANCL1	85.7	94.4	110.3	113.4	89.9	110.3	120.9	96.4	105.3	109.6
Elongation factor Ts, mitochondrial OS=Homo sapiens OX=9606 GN=TSFM PE=1 SV=2	TSFM	595.1	894.5	734.3	821.4	794.8	773.7	900	849	842.2	846.8
40S ribosomal protein S27-like OS=Homo sapiens OX=9606 GN=RPS27L PE=1 SV=3	RPS27L	132.3	225.5	165.8	204.9	227.6	170.4	255.6	234.2	197.9	214.8
DAZ-associated protein 1 OS=Homo sapiens OX=9606 GN=DAZAP1 PE=1 SV=1	DAZAP1	751.2	980.7	1062.5	915.4	767.9	967.2	823.8	900.5	1034.3	939
Iron-sulfur protein NUBPL (Fragment) OS=Homo sapiens OX=9606 GN=NUBPL PE=1 SV=1	NUBPL	95.9	131.1	112.5	129.3	128.3	124.4	137.6	139.2	132.5	139.8
Tubulin--tyrosine ligase-like protein 12 OS=Homo sapiens OX=9606 GN=TTLL12 PE=1 SV=2	TTLL12	1822.7	2144	2004.1	2286.4	1915	2157.3	2293.7	2277.6	2202.9	2252.7
Heterogeneous nuclear ribonucleoproteins C1/C2 OS=Homo sapiens OX=9606 GN=HNRNPC PE=1 SV=4	HNRNPC	37.7	45.9	43.1	50.6	42.3	48.6	45.7	44.9	51.8	50.9
Asparagine--tRNA ligase, cytoplasmic OS=Homo sapiens OX=9606 GN=NARS1 PE=1 SV=1	NARS1	2569.9	3531.6	2821.6	3566.1	3231.6	3032.1	4106.1	3878	3653.6	3590.7
m-AAA protease-interacting protein 1, mitochondrial (Fragment) OS=Homo sapiens OX=9606 GN=MAIP1 PE=1 SV=1	MAIP1	37.6	79.5	49.5	65.8	55.9	62.3	65.7	62.9	67.4	61.8
Proteasome activator complex subunit 3 OS=Homo sapiens OX=9606 GN=PSME3 PE=1 SV=1	PSME3	6444.3	7792.8	7296	8850.7	6593.5	8457	8350.5	7973.3	8140.3	7475.5
mRNA export factor OS=Homo sapiens OX=9606 GN=RAE1 PE=1 SV=1	RAE1	1123.9	1333.2	1539	1025.1	1073.3	1445.8	1320.9	1357.8	1365	1418.2
Ribosomal RNA processing protein 1 homolog B OS=Homo sapiens OX=9606 GN=RRP1B PE=1 SV=3	RRP1B	1059.2	2182.2	1424.4	1875.2	2306.3	1230.5	2577.8	2543.2	1921.4	2102.6
Brefeldin A-inhibited guanine nucleotide-exchange protein 2 OS=Homo sapiens OX=9606 GN=ARFGEF2 PE=1 SV=3	ARFGEF2	33.3	45.2	35.4	44.9	32.7	34.8	47.6	41.2	43.6	42.5
Copper transport protein ATOX1 OS=Homo sapiens OX=9606 GN=ATOX1 PE=1 SV=1	ATOX1	860.3	1011.7	1021.3	887.1	768.4	1007.1	1065.4	1002.4	1009.8	978.5
Prolyl 4-hydroxylase subunit alpha-2 OS=Homo sapiens OX=9606 GN=P4HA2 PE=1 SV=1	P4HA2	240.4	342.7	279.3	348.6	322.7	328.9	340.3	339.4	357	340.1
Recombining binding protein suppressor of hairless OS=Homo sapiens OX=9606 GN=RBPJ PE=1 SV=3	RBPJ	293.6	407.6	344	394.5	338.9	367.5	415.8	385.8	403.9	404.1
28S ribosomal protein S7, mitochondrial OS=Homo sapiens OX=9606 GN=MRPS7 PE=1 SV=2	MRPS7	283.9	433.7	356.3	357.1	399.2	283.1	456.2	425.3	369	359.2
Serine/threonine-protein phosphatase (Fragment) OS=Homo sapiens OX=9606 GN=PPP5C PE=1 SV=1	PPP5C	1743.2	2095.2	1958.6	2214.5	1725.1	2180.1	2203.6	2145.7	2204	2080.6
WD repeat-containing protein 26 OS=Homo sapiens OX=9606 GN=WDR26 PE=1 SV=1	WDR26	150.9	202.6	177.3	215.2	158.5	193.9	202.2	193.9	196.7	192
Microfibrillar-associated protein 1 OS=Homo sapiens OX=9606 GN=MFAP1 PE=1 SV=2	MFAP1	430.5	580.9	567.9	605	528.9	571.4	585.8	598.2	633.4	621.8
Synaptobrevin homolog YKT6 OS=Homo sapiens OX=9606 GN=YKT6 PE=1 SV=1	YKT6	28.1	32.8	30.7	30.8	26.2	29.8	33	33.5	36.6	33
Deoxyhypusine synthase OS=Homo sapiens OX=9606 GN=DHPS PE=1 SV=1	DHPS	8.6	12.3	9.6	13.2	10.1	12.6	11.8	13.9	13.5	10.6
Heat shock protein HSP 90-beta OS=Homo sapiens OX=9606 GN=HSP90AB1 PE=1 SV=4	HSP90AB1	34011.8	39009.8	37443.5	44199	33654.8	43011.5	42732.6	40868.8	41331.2	39698
BAG family molecular chaperone regulator 2 OS=Homo sapiens OX=9606 GN=BAG2 PE=1 SV=1	BAG2	697.7	885.8	828.6	834.1	665.6	896.6	795.8	812.8	906.3	793.2
REST corepressor 1 OS=Homo sapiens OX=9606 GN=RCOR1 PE=1 SV=2	RCOR1	321.3	487.7	393.4	448.8	418.6	412.7	508.9	479.8	487.4	464.2
Serine/threonine-protein phosphatase 4 catalytic subunit OS=Homo sapiens OX=9606 GN=PPP4C PE=1 SV=1	PPP4C	193.3	203.2	213.3	247	189.2	260.1	231.5	223.5	219.3	222.3
Ribosomal RNA processing protein 1 homolog A OS=Homo sapiens OX=9606 GN=RRP1 PE=1 SV=1	RRP1	234.5	355.7	277	353.6	409.8	268.3	418.7	408.5	361.2	402.7
Exportin-7 OS=Homo sapiens OX=9606 GN=XPO7 PE=1 SV=1	XPO7	1486.7	1930.4	1687.1	2144.6	1707.5	1907.5	2130.1	2061.8	1950	1908.5
La-related protein 4 OS=Homo sapiens OX=9606 GN=LARP4 PE=1 SV=3	LARP4	461.5	622.8	614	606.4	493.6	623.6	617.3	586.8	619.8	609.9
Protein AATF OS=Homo sapiens OX=9606 GN=AATF PE=1 SV=1	AATF	207.6	353.5	281.2	334.8	304.5	309.4	359	367.2	342.1	354.1
Pyrroline-5-carboxylate reductase 1, mitochondrial OS=Homo sapiens OX=9606 GN=PYCR1 PE=1 SV=2	PYCR1	1224.8	1480.5	1523.9	1527.8	1392.8	1631.2	1555.9	1522	1617	1538.6
NIF3-like protein 1 OS=Homo sapiens OX=9606 GN=NIF3L1 PE=1 SV=2	NIF3L1	163.1	224	178.1	207	160.5	209.2	211.7	219.7	204.1	194
Nucleoporin SEH1 OS=Homo sapiens OX=9606 GN=SEH1L PE=1 SV=3	SEH1L	197	242.7	231.4	306.5	245.2	254.9	255.7	252.2	238.7	223.3
Glutaredoxin-1 OS=Homo sapiens OX=9606 GN=GLRX PE=1 SV=2	GLRX	311.3	387.6	356.9	417	288.2	422.7	406.8	368.6	410.6	372.8
Mitochondrial-processing peptidase subunit beta OS=Homo sapiens OX=9606 GN=PMPCB PE=1 SV=2	PMPCB	1438.2	1900	1811.3	1947.1	1716.2	2073.5	1969.8	2016.5	1988.6	1922.4
UPF0690 protein C1orf52 OS=Homo sapiens OX=9606 GN=C1orf52 PE=1 SV=1	C1orf52	11.3	11.5	13.4	14.8	13.9	17.9	17.2	12.9	13.7	16.3
Enoyl-CoA delta isomerase 2, mitochondrial OS=Homo sapiens OX=9606 GN=ECI2 PE=1 SV=1	ECI2	749.1	968.4	932.6	1073.8	868.5	1070.4	1016.6	1055.2	1054.7	982.7
SUMO-activating enzyme subunit 1 OS=Homo sapiens OX=9606 GN=SAE1 PE=1 SV=1	SAE1	2443.9	2888.7	2781.8	3190	2386.3	3132.4	3073.3	2948.4	2995.2	2807.6
Flavin reductase (NADPH) OS=Homo sapiens OX=9606 GN=BLVRB PE=1 SV=3	BLVRB	143.9	198.6	190.1	179.6	132.8	196	173.6	203.2	183.3	183.6
Pre-mRNA-processing factor 31 OS=Homo sapiens OX=9606 GN=PRPF31 PE=1 SV=1	PRPF31	482.5	680.7	560.5	641.5	662	460.6	729.5	621.5	654.5	586.5
Transformation/transcription domain-associated protein OS=Homo sapiens OX=9606 GN=TRRAP PE=1 SV=2	TRRAP	12.5	17.3	14.1	25.9	16.7	16.5	14.4	21.5	15.7	19.6
Protein HGH1 homolog OS=Homo sapiens OX=9606 GN=HGH1 PE=1 SV=1	HGH1	624.1	698.4	670.3	781.3	619.2	754.5	756.8	729.5	786.9	742.5
CCAAT/enhancer-binding protein zeta OS=Homo sapiens OX=9606 GN=CEBPZ PE=1 SV=3	CEBPZ	565.4	929.1	722.1	889.4	935.3	696.5	1048.4	978.3	907	877.8
40S ribosomal protein S20 OS=Homo sapiens OX=9606 GN=RPS20 PE=1 SV=1	RPS20	2708.6	3701.7	3221.7	3380.1	2964.5	3213.8	3858.6	3562.8	3446.1	3621.7
eIF-2-alpha kinase activator GCN1 OS=Homo sapiens OX=9606 GN=GCN1 PE=1 SV=6	GCN1	5247.2	6627.1	5934.7	7063.6	5809	6688.8	7488.7	7253.7	7167.6	6803.4
Glycine--tRNA ligase OS=Homo sapiens OX=9606 GN=GARS1 PE=4 SV=1	GARS1	3617.3	4012.9	4009.9	4543.8	3625.7	4466.5	4672.7	4473	4385.6	4243.4
ATPase MORC2 OS=Homo sapiens OX=9606 GN=MORC2 PE=1 SV=2	MORC2	110	175.6	121.1	174.2	142.5	133	184	149.8	153.5	169.7
Mesoderm induction early response protein 1 OS=Homo sapiens OX=9606 GN=MIER1 PE=1 SV=2	MIER1	28.4	24.9	35.5	36.4	30.2	34.9	29.1	38.6	35.8	45.6
Stomatin-like protein 2, mitochondrial OS=Homo sapiens OX=9606 GN=STOML2 PE=1 SV=1	STOML2	2014.6	2523.1	2611.3	2553.8	2230.2	2778.3	2641.4	2574.2	2841.8	2536.2
Cleavage stimulation factor subunit 2 OS=Homo sapiens OX=9606 GN=CSTF2 PE=1 SV=1	CSTF2	326.6	393.4	398	402.8	334.7	429.8	396.5	381.6	431.2	391.9
Casein kinase II subunit alpha OS=Homo sapiens OX=9606 GN=CSNK2A1 PE=1 SV=1	CSNK2A1	2520.8	3801.9	2875.4	3876.8	3255.6	3226.7	4030.7	3945.8	3628.1	3577.6
NADH dehydrogenase [ubiquinone] 1 alpha subcomplex subunit 11 OS=Homo sapiens OX=9606 GN=NDUFA11 PE=1 SV=3	NDUFA11	72.2	123.4	100.3	81.5	91.6	93.5	116.4	96.6	104.6	107.2
Regulation of nuclear pre-mRNA domain-containing protein 1A OS=Homo sapiens OX=9606 GN=RPRD1A PE=1 SV=1	RPRD1A	956	1363.1	1135.6	1297.5	1057.6	1152	1344.4	1292.2	1322.3	1285.1
Exosome RNA helicase MTR4 OS=Homo sapiens OX=9606 GN=MTREX PE=1 SV=3	MTREX	2026.3	2681.9	2318.6	2789.2	2442.6	2592	3013.1	2750.1	2740.7	2526.1
Protein PRRC2B OS=Homo sapiens OX=9606 GN=PRRC2B PE=1 SV=2	PRRC2B	474.9	598.7	596.4	649.3	496.7	598.2	626.8	603.1	674.7	635.6
Pyrroline-5-carboxylate reductase 3 OS=Homo sapiens OX=9606 GN=PYCR3 PE=1 SV=3	PYCR3	253	287.3	302.2	334.1	257.4	323.8	312.7	306.6	318.4	305
Tumor protein D54 OS=Homo sapiens OX=9606 GN=TPD52L2 PE=1 SV=2	TPD52L2	1081.7	1389.9	1215.3	1452.1	1101.2	1457.8	1386.8	1326.8	1373.5	1288.9
Zinc finger Ran-binding domain-containing protein 2 OS=Homo sapiens OX=9606 GN=ZRANB2 PE=1 SV=2	ZRANB2	1448.4	1676.6	1663.8	1862.6	1452.8	1805.7	1911.3	1722.4	1923.5	1699.2
Heat shock protein 75 kDa, mitochondrial OS=Homo sapiens OX=9606 GN=TRAP1 PE=1 SV=3	TRAP1	5088	6958.9	6343.5	6968.6	6454.3	7143.1	7282.8	7320.5	6998	6742.5
La-related protein 4B OS=Homo sapiens OX=9606 GN=LARP4B PE=1 SV=3	LARP4B	820	1000.7	958.8	963.6	834.9	1032.2	1022.1	1041.3	1130	1082.9
Acyl-protein thioesterase 2 OS=Homo sapiens OX=9606 GN=LYPLA2 PE=1 SV=1	LYPLA2	411.6	606.8	495.9	547.7	400.6	569.5	501.9	538.6	483.5	497.5
OCIA domain-containing protein 1 OS=Homo sapiens OX=9606 GN=OCIAD1 PE=1 SV=1	OCIAD1	604.3	928.7	786.7	754.8	743.5	792.5	848.7	854	801.2	834.3
60S ribosomal protein L23 OS=Homo sapiens OX=9606 GN=RPL23 PE=1 SV=1	RPL23	2839.7	4459	3321.6	3689.7	3620.3	3201.5	4686.4	4356.1	3755.4	4006.4
Non-structural maintenance of chromosomes element 4 homolog A OS=Homo sapiens OX=9606 GN=NSMCE4A PE=1 SV=2	NSMCE4A	68	102.5	96.1	110.1	89.4	90.8	102.7	104.3	124.7	91.9
Transmembrane 9 superfamily member 2 OS=Homo sapiens OX=9606 GN=TM9SF2 PE=1 SV=1	TM9SF2	209.6	264.3	242.9	250	234.7	252.6	281	248.9	281	274.2
Heterogeneous nuclear ribonucleoprotein K OS=Homo sapiens OX=9606 GN=HNRNPK PE=1 SV=1	HNRNPK	1834.9	2133.5	2611.4	2348.9	1894.9	2342.2	2037.4	2226.5	2393.3	2346.7
39S ribosomal protein L18, mitochondrial OS=Homo sapiens OX=9606 GN=MRPL18 PE=1 SV=1	MRPL18	14.6	18.8	17.6	14.6	15.2	18.8	17.9	19.1	17.5	14
Protein PBDC1 OS=Homo sapiens OX=9606 GN=PBDC1 PE=1 SV=1	PBDC1	241.9	256.7	279.7	239.2	214.2	251.8	268.2	273.1	283.6	310.2
Chromatin modification-related protein MEAF6 OS=Homo sapiens OX=9606 GN=MEAF6 PE=1 SV=1	MEAF6	35.5	74.3	73.4	59.2	57.7	59	53.6	58.8	73.2	67.4
Chromobox protein homolog 1 (Fragment) OS=Homo sapiens OX=9606 GN=CBX1 PE=1 SV=8	CBX1	2354.3	3246.2	2790.7	3045.9	2614.2	3260.3	2917.3	3028.1	2951.6	3206.5
Casein kinase I isoform alpha OS=Homo sapiens OX=9606 GN=CSNK1A1 PE=1 SV=2	CSNK1A1	48.3	66	53.4	69.2	65	61.6	80.7	67.3	63.5	69.5
Prohibitin OS=Homo sapiens OX=9606 GN=PHB PE=1 SV=1	PHB	9232.6	11724.7	11732.2	11830	10481.7	13226.7	11794.3	12314.2	12389.4	12230.6
UPF0687 protein C20orf27 OS=Homo sapiens OX=9606 GN=C20orf27 PE=1 SV=3	C20orf27	1000.4	1175.8	1094.6	1301.3	944.6	1326.5	1227.1	1169.9	1159.6	1160
40S ribosomal protein S21 OS=Homo sapiens OX=9606 GN=RPS21 PE=1 SV=1	RPS21	2094.6	3794.5	4717.3	2146.2	1796.6	2670.6	2083.8	2819.4	4012.6	3931.2
Kinesin light chain 4 OS=Homo sapiens OX=9606 GN=KLC4 PE=1 SV=3	KLC4	222	294.2	265.8	291.4	224.9	306.3	304.7	285.6	295.9	273
U6 snRNA-associated Sm-like protein LSm6 OS=Homo sapiens OX=9606 GN=LSM6 PE=1 SV=1	LSM6	453.2	571.7	631.3	555.5	453.5	577.7	522.3	613.7	634.2	718.3
Replication termination factor 2 (Fragment) OS=Homo sapiens OX=9606 GN=RTF2 PE=1 SV=1	RTF2	211.3	269.9	226.4	291.1	217.7	269.6	279.5	265	256.2	283.6
Acylphosphatase OS=Homo sapiens OX=9606 GN=ACYP1 PE=1 SV=1	ACYP1	375.3	534	585.7	429.8	346	478.5	406.7	479.8	559.3	619.2
Splicing factor 3A subunit 3 OS=Homo sapiens OX=9606 GN=SF3A3 PE=1 SV=1	SF3A3	3391.4	4077.2	4021.3	4458.2	3617.6	4552.9	4393.4	4219.7	4296.8	4214.8
Importin subunit alpha-3 OS=Homo sapiens OX=9606 GN=KPNA4 PE=1 SV=1	KPNA4	347.1	464.9	401.6	469	377.7	473.4	450.6	464.4	443.3	440
Ubiquitin-like modifier-activating enzyme ATG7 OS=Homo sapiens OX=9606 GN=ATG7 PE=1 SV=1	ATG7	229	281.4	246.4	325.7	213.7	289.4	293.5	297	293.5	261.2
Crk-like protein OS=Homo sapiens OX=9606 GN=CRKL PE=1 SV=1	CRKL	925.9	1230.2	1329.4	1065.7	857.1	1180.1	1095	1126.2	1327.2	1345.9
Translation machinery-associated protein 7 OS=Homo sapiens OX=9606 GN=TMA7 PE=1 SV=1	TMA7	617.3	609	609	681.6	523.2	714.8	737.5	659.4	603.8	744.9
PCNA-associated factor OS=Homo sapiens OX=9606 GN=PCLAF PE=1 SV=1	PCLAF	208.9	304.5	243.9	294.2	219.2	267.7	247.2	263.7	256	270.3
DNA-directed RNA polymerase II subunit E OS=Homo sapiens OX=9606 GN=POLR2E PE=1 SV=1	POLR2E	711.5	854.8	812.3	939.4	757.1	937.8	924.2	865.7	938.7	881.5
Signal recognition particle subunit SRP72 OS=Homo sapiens OX=9606 GN=SRP72 PE=1 SV=3	SRP72	1269.4	2541.5	1586.4	2276.9	2143	1575.3	2647.6	2652.8	2321.1	2293.2
Myotubularin-related protein 5 OS=Homo sapiens OX=9606 GN=SBF1 PE=1 SV=4	SBF1	25.9	35.8	31	26.8	33.8	26.8	41.4	33.5	40.2	34.9
Paired amphipathic helix protein Sin3a OS=Homo sapiens OX=9606 GN=SIN3A PE=1 SV=2	SIN3A	198.3	304.1	223.8	274.5	288.7	235.6	316.7	356.3	286.6	313.4
Catechol O-methyltransferase OS=Homo sapiens OX=9606 GN=COMT PE=1 SV=2	COMT	177	224.4	218	186.9	201.7	210.4	233.7	228.7	245.4	266.2
Protein ERGIC-53 OS=Homo sapiens OX=9606 GN=LMAN1 PE=1 SV=2	LMAN1	541.9	807.4	707	708.9	705.1	689.9	836.3	782.6	751.1	759.4
Serine/arginine repetitive matrix protein 1 OS=Homo sapiens OX=9606 GN=SRRM1 PE=1 SV=2	SRRM1	1523.1	2387.9	1744.9	2349.1	2044.6	1939.2	2568.5	2395.1	2230.9	2243.7
Secernin-1 OS=Homo sapiens OX=9606 GN=SCRN1 PE=1 SV=2	SCRN1	948.6	1265	1098.2	1242.4	887	1272.5	1199.3	1187.3	1251.5	1146.2
Phosphoribosyl pyrophosphate synthase-associated protein 2 (Fragment) OS=Homo sapiens OX=9606 GN=PRPSAP2 PE=1 SV=1	PRPSAP2	235.3	273.9	273.7	325.9	276.3	299.1	359.4	331.5	328.4	305.4
Phosphorylated adapter RNA export protein OS=Homo sapiens OX=9606 GN=PHAX PE=1 SV=1	PHAX	786.7	993.1	946.8	1072	813.3	1097.2	1068.5	973.2	1005.8	945.6
Rab GTPase-activating protein 1-like (Fragment) OS=Homo sapiens OX=9606 GN=RABGAP1L PE=1 SV=1	RABGAP1L	473.7	633.1	557.2	636.9	543.1	626.6	617.1	621	617.9	632
Protein ZNRD2 OS=Homo sapiens OX=9606 GN=ZNRD2 PE=1 SV=1	ZNRD2	392.2	515.5	488.4	453	335.9	498.8	459.6	486	484	456.8
Methionine aminopeptidase 2 OS=Homo sapiens OX=9606 GN=METAP2 PE=1 SV=1	METAP2	292.2	380.1	327.4	382.5	373.2	292.3	465.7	382	387.2	369.4
Programmed cell death protein 6 OS=Homo sapiens OX=9606 GN=PDCD6 PE=1 SV=1	PDCD6	523.6	597.1	563.6	671.2	509	594.1	655.8	611.1	609.7	592
Calponin-3 OS=Homo sapiens OX=9606 GN=CNN3 PE=1 SV=1	CNN3	4250.3	5136.2	5582.9	4221.3	3752.5	5401.7	4853.7	5055.9	5684.6	5488
DNA polymerase (Fragment) OS=Homo sapiens OX=9606 GN=POLB PE=1 SV=1	POLB	243.6	316.3	297.2	350.3	294	286.8	340.8	332.5	297.4	341.9
Inhibitor of nuclear factor kappa-B kinase-interacting protein OS=Homo sapiens OX=9606 GN=IKBIP PE=1 SV=1	IKBIP	10.1	12.4	16.9	12.1	8.6	11.1	12.9	13	14.4	10.1
Proteasome subunit alpha type-5 OS=Homo sapiens OX=9606 GN=PSMA5 PE=1 SV=3	PSMA5	3066.6	3605.7	3640.9	3609.2	2819.5	3898.9	3677	3628.8	3761.5	3534.1
Probable tRNA pseudouridine synthase 1 OS=Homo sapiens OX=9606 GN=TRUB1 PE=1 SV=1	TRUB1	480.1	586.6	592.6	549.2	492.4	638.4	590.2	543.2	580.2	572.2
Vasodilator-stimulated phosphoprotein OS=Homo sapiens OX=9606 GN=VASP PE=1 SV=3	VASP	36.7	39.6	39.9	45	40.9	49.9	43.6	36	45.5	44.1
General transcription factor 3C polypeptide 4 OS=Homo sapiens OX=9606 GN=GTF3C4 PE=1 SV=2	GTF3C4	538.1	651.1	599.8	751.9	643.9	683.1	727.6	696.4	671.7	647.3
Probable ATP-dependent RNA helicase DDX23 OS=Homo sapiens OX=9606 GN=DDX23 PE=1 SV=3	DDX23	283.8	490.8	352	476.8	453.4	372.9	510.2	523.7	395.4	514.7
DNA (cytosine-5)-methyltransferase 1 OS=Homo sapiens OX=9606 GN=DNMT1 PE=1 SV=2	DNMT1	630.2	985.6	747.4	925.8	869.3	675	1111.7	1005.7	936.1	957.4
Complex I-B16.6 OS=Homo sapiens OX=9606 GN=NDUFA13 PE=3 SV=1	NDUFA13	62.8	80	88.7	54.9	82.8	72.3	91.7	84.8	93.4	96.2
SURP and G-patch domain-containing protein 1 OS=Homo sapiens OX=9606 GN=SUGP1 PE=1 SV=2	SUGP1	131.4	169.6	179	156.9	120.6	166.9	147	161	178.1	190.8
UV excision repair protein RAD23 homolog A OS=Homo sapiens OX=9606 GN=RAD23A PE=1 SV=1	RAD23A	644.3	781.1	742.5	869.1	637.5	836.5	810.7	775.9	785.2	779.5
Probable leucine--tRNA ligase, mitochondrial OS=Homo sapiens OX=9606 GN=LARS2 PE=1 SV=2	LARS2	31.4	69.4	42.7	67	58.5	66.3	64.7	73	64.9	67.9
Transcriptional repressor p66-beta OS=Homo sapiens OX=9606 GN=GATAD2B PE=1 SV=1	GATAD2B	566.4	916.1	863.9	758	602.2	718.5	685.7	693	765.8	758.2
Actin, cytoplasmic 1 (Fragment) OS=Homo sapiens OX=9606 GN=ACTB PE=1 SV=1	ACTB	7743.4	8662.2	9080.9	9769.3	8198.1	10228.1	9856.3	9432	9871.2	9274.7
Epidermal growth factor receptor substrate 15-like 1 OS=Homo sapiens OX=9606 GN=EPS15L1 PE=1 SV=1	EPS15L1	552.6	711.2	707.1	760	586.1	764.2	720.4	715.6	767.8	731.7
Insulin-like growth factor 2 mRNA-binding protein 1 OS=Homo sapiens OX=9606 GN=IGF2BP1 PE=1 SV=2	IGF2BP1	5613.8	7140.6	6639.3	6883.9	5881.8	6849.5	7529.1	6937.2	7262.9	6828.6
RPA-related protein RADX OS=Homo sapiens OX=9606 GN=RADX PE=1 SV=2	RADX	234.5	366.1	269.2	361.6	341.3	311.8	380.1	366.7	314.8	346.4
Prolyl endopeptidase OS=Homo sapiens OX=9606 GN=PREP PE=1 SV=2	PREP	1841.4	2190.5	1982.7	2437.1	1923.7	2264.2	2470.2	2340.6	2247.9	2233.4
Ubiquitin-like modifier-activating enzyme 1 OS=Homo sapiens OX=9606 GN=UBA1 PE=1 SV=3	UBA1	13498.3	15820.4	14724.7	17289.3	13117.6	16210.6	16408.2	16044.7	15619.9	15365
ATP-binding cassette sub-family E member 1 (Fragment) OS=Homo sapiens OX=9606 GN=ABCE1 PE=1 SV=1	ABCE1	115.9	168.5	138.3	167.8	143	142.3	174.7	190.2	178.7	152.7
SWI/SNF-related matrix-associated actin-dependent regulator of chromatin subfamily E member 1 OS=Homo sapiens OX=9606 GN=SMARCE1 PE=1 SV=1	SMARCE1	1070.7	1511.7	1603.8	1300.9	1104.2	1356.2	1206.5	1305	1372.9	1424.7
Regulation of nuclear pre-mRNA domain-containing protein 2 OS=Homo sapiens OX=9606 GN=RPRD2 PE=1 SV=1	RPRD2	273.3	357.2	317.3	376.8	312.8	361.7	369	362.2	380.1	345.9
THO complex subunit 2 OS=Homo sapiens OX=9606 GN=THOC2 PE=1 SV=2	THOC2	17.2	48.9	22.8	34.1	29.2	23.5	29	30.4	25.1	33.8
U1 small nuclear ribonucleoprotein A OS=Homo sapiens OX=9606 GN=SNRPA PE=1 SV=3	SNRPA	707.7	861.8	828.4	949.5	719.2	964.4	866.8	891.3	850.1	835.7
Cyclin-T1 OS=Homo sapiens OX=9606 GN=CCNT1 PE=1 SV=1	CCNT1	576.6	1048.1	664.5	984.2	916.2	734.5	1085.6	1102.2	892.3	965.7
Copper homeostasis protein cutC homolog (Fragment) OS=Homo sapiens OX=9606 GN=CUTC PE=1 SV=1	CUTC	138.1	167.5	153.7	178.2	130.4	163.7	173.5	172.9	170.7	179.1
Mortality factor 4-like protein 2 OS=Homo sapiens OX=9606 GN=MORF4L2 PE=1 SV=1	MORF4L2	200.5	341.8	235.6	330.9	265.6	253.9	405	373.4	333.3	291.6
Elongator complex protein 2 OS=Homo sapiens OX=9606 GN=ELP2 PE=1 SV=2	ELP2	528.1	572	564.3	660.9	542.3	600.3	640.8	607.6	648.9	628.2
Phosphorylase b kinase regulatory subunit OS=Homo sapiens OX=9606 GN=PHKA1 PE=1 SV=1	PHKA1	97.9	138.8	115	137.1	119.5	123.9	153.6	139.2	131.1	124.6
Apoptosis regulator BAX OS=Homo sapiens OX=9606 GN=BAX PE=1 SV=1	BAX	135.9	163.5	153.6	177.2	137.4	172.1	175	147	182.8	147.1
WD repeat-containing protein 36 OS=Homo sapiens OX=9606 GN=WDR36 PE=1 SV=1	WDR36	121.6	183.8	149.3	189.1	196.6	153.8	197.3	206.8	178.9	174.8
Glutamine--tRNA ligase OS=Homo sapiens OX=9606 GN=QARS1 PE=1 SV=1	QARS1	4266.2	5436.4	4962.6	5750.1	5001.4	5395.4	6056.9	5833.1	5728.5	5300.1
Cyclin-dependent kinase 9 OS=Homo sapiens OX=9606 GN=CDK9 PE=1 SV=3	CDK9	14.8	25.3	20.8	21.9	23.4	25.1	26.2	27.9	22	24.8
Coiled-coil domain-containing protein 22 OS=Homo sapiens OX=9606 GN=CCDC22 PE=1 SV=1	CCDC22	415.3	490.4	461	528.6	423.1	514.2	520	495.6	521.3	489.7
Isoleucine--tRNA ligase, cytoplasmic OS=Homo sapiens OX=9606 GN=IARS1 PE=1 SV=2	IARS1	5487.3	6889	6437.2	7461.9	6067.9	6947.9	7127.6	7147.2	6949.7	6555.9
Nucleolar and coiled-body phosphoprotein 1 (Fragment) OS=Homo sapiens OX=9606 GN=NOLC1 PE=1 SV=1	NOLC1	5960.8	7841.5	7278	8342.1	7161.1	8494.9	8376.9	7822.8	8155.4	7442.9
Protein yippee-like 5 OS=Homo sapiens OX=9606 GN=YPEL5 PE=1 SV=1	YPEL5	87.1	109.4	107.8	92.1	84	110.1	92.1	93.4	119.5	110.3
D-3-phosphoglycerate dehydrogenase OS=Homo sapiens OX=9606 GN=PHGDH PE=1 SV=4	PHGDH	6857.3	7676.7	7834.7	8299	6415.7	8667.8	8063.5	8305.8	8172.2	8065.1
40S ribosomal protein S14 (Fragment) OS=Homo sapiens OX=9606 GN=RPS14 PE=1 SV=1	RPS14	2075.5	3080	2579.5	2716.4	2714.9	2229.7	3183	3009.6	2754.3	2860.9
LRP chaperone MESD OS=Homo sapiens OX=9606 GN=MESD PE=1 SV=2	MESD	612.6	791.9	753.4	824.3	680.4	867.5	797.5	788.1	829.1	806.5
Glycogen debranching enzyme OS=Homo sapiens OX=9606 GN=AGL PE=1 SV=3	AGL	1142	1746.4	1278.2	1605.9	1351.9	1482	1591.9	1597.8	1615.4	1551.6
Ubiquitin-associated protein 2-like OS=Homo sapiens OX=9606 GN=UBAP2L PE=1 SV=2	UBAP2L	3759.7	4633.1	4512.7	4967.9	3775.8	5001.1	4788.9	4478	4882.6	4525.6
Cleavage stimulation factor subunit 1 OS=Homo sapiens OX=9606 GN=CSTF1 PE=1 SV=1	CSTF1	412.9	538.3	515.5	565.6	465.5	549.4	555.7	571.1	568.8	534.5
Peroxiredoxin-6 OS=Homo sapiens OX=9606 GN=PRDX6 PE=1 SV=3	PRDX6	5054.6	6087.3	5726.4	6348.6	4929.7	6042.8	6577	5869.4	6416.3	5694.6
tRNA (adenine(58)-N(1))-methyltransferase (Fragment) OS=Homo sapiens OX=9606 GN=TRMT61A PE=1 SV=1	TRMT61A	197.3	209.4	201.3	223	202	197.7	216.5	222	219.1	239.4
Basic leucine zipper and W2 domain-containing protein 2 OS=Homo sapiens OX=9606 GN=BZW2 PE=1 SV=1	BZW2	940.4	1373.4	1026.6	1359.2	1149.6	1187.3	1523.9	1396.3	1310.9	1232.1
Membrane-associated progesterone receptor component 1 OS=Homo sapiens OX=9606 GN=PGRMC1 PE=1 SV=3	PGRMC1	167.1	231.1	225	181.3	236.1	176.7	272.8	220.1	247.1	272.6
60S ribosomal protein L22 OS=Homo sapiens OX=9606 GN=RPL22 PE=1 SV=2	RPL22	2340.3	3114.4	2718.3	3061.8	3093.5	2619.8	3910.3	3685	3075.6	3185.4
Spermidine synthase OS=Homo sapiens OX=9606 GN=SRM PE=1 SV=1	SRM	1363.4	1689.9	1574.7	1839.1	1353.7	1719.7	1830.8	1666.3	1725.6	1606.8
Nucleobindin-1 OS=Homo sapiens OX=9606 GN=NUCB1 PE=1 SV=4	NUCB1	439.4	565.9	519.7	628.3	508	584.8	594.8	557.4	612.4	586.2
E3 ubiquitin-protein ligase HUWE1 OS=Homo sapiens OX=9606 GN=HUWE1 PE=1 SV=3	HUWE1	2706.6	3472.9	3085	3813.4	2899.3	3573.8	3586	3576.3	3367.9	3334.4
FUN14 domain-containing protein 1 OS=Homo sapiens OX=9606 GN=FUNDC1 PE=1 SV=1	FUNDC1	16	27.6	22.3	23.2	24.4	23.7	25.4	23.9	25.1	24.4
STAM-binding protein OS=Homo sapiens OX=9606 GN=STAMBP PE=1 SV=1	STAMBP	94.8	105.1	113.7	122.5	86.9	119.6	117.6	102.8	117.4	106.9
39S ribosomal protein L28, mitochondrial (Fragment) OS=Homo sapiens OX=9606 GN=MRPL28 PE=1 SV=1	MRPL28	78	120.3	103.2	108.7	112.7	96.5	124.3	118	115.8	113.3
Probable ATP-dependent RNA helicase DDX20 OS=Homo sapiens OX=9606 GN=DDX20 PE=1 SV=2	DDX20	835.9	1050.6	882.3	1111.4	921.9	1033.6	1164.9	1102	1116.7	1006.5
NudC domain-containing protein 2 OS=Homo sapiens OX=9606 GN=NUDCD2 PE=1 SV=1	NUDCD2	542.4	820.9	750.8	734.5	494.8	752.2	636.2	720.3	736.7	814.5
Pre-rRNA-processing protein TSR2 homolog OS=Homo sapiens OX=9606 GN=TSR2 PE=1 SV=1	TSR2	48.8	58	48.4	63.8	37.2	61.5	55.9	56.1	53.9	57
Bystin OS=Homo sapiens OX=9606 GN=BYSL PE=1 SV=3	BYSL	703.3	987.6	827.6	1007.6	931.4	831.7	1107.4	1015.7	1011.5	899.9
Pre-mRNA-splicing factor SYF1 OS=Homo sapiens OX=9606 GN=XAB2 PE=1 SV=2	XAB2	141.8	222.7	153.2	236.2	207.1	204.1	229.8	245.8	199	227.1
Heat shock protein HSP 90-alpha OS=Homo sapiens OX=9606 GN=HSP90AA1 PE=1 SV=5	HSP90AA1	34569.1	39129.9	37004.5	42899.6	33880.5	42155.6	41761.3	39636.7	38939.6	39473.1
60S ribosomal protein L11 OS=Homo sapiens OX=9606 GN=RPL11 PE=1 SV=2	RPL11	2416.3	3427.2	2869.4	3252.6	3081.5	2763.6	3755	3633.9	3265.6	3351.4
Aconitate hydratase, mitochondrial OS=Homo sapiens OX=9606 GN=ACO2 PE=1 SV=1	ACO2	3219.1	4711.7	4248.9	4215.9	3818.4	4570.2	4587.3	4550.4	4865	4333.1
Proteasome subunit beta type-7 OS=Homo sapiens OX=9606 GN=PSMB7 PE=1 SV=1	PSMB7	1700.4	2116.7	2125.4	2059.6	1613.1	2169.1	2054.8	2050.1	2066.9	2012.7
Inactive tyrosine-protein kinase 7 OS=Homo sapiens OX=9606 GN=PTK7 PE=1 SV=2	PTK7	95.4	120.3	108.7	107.3	99.6	112.1	116.5	121.3	116.8	114.7
Protein MAK16 homolog OS=Homo sapiens OX=9606 GN=MAK16 PE=1 SV=2	MAK16	208.7	284.5	265.5	304.5	253.4	302.7	283	307.7	281.6	291.8
ATP synthase subunit gamma, mitochondrial OS=Homo sapiens OX=9606 GN=ATP5F1C PE=1 SV=1	ATP5F1C	1737.9	2900.4	2187.6	2558.7	2741.2	2182.9	2990.3	3037.4	2710.9	2645.3
Elongation factor 1-delta (Fragment) OS=Homo sapiens OX=9606 GN=EEF1D PE=1 SV=8	EEF1D	104.8	160.6	159.5	126.7	96.5	132	114.9	121.1	150	146
Importin subunit beta-1 OS=Homo sapiens OX=9606 GN=KPNB1 PE=1 SV=2	KPNB1	13155.5	14862.8	15026.6	17083.2	13753.9	16567.2	16936	16290.3	16644.7	15819.4
Helix-destabilizing protein OS=Homo sapiens OX=9606 GN=HNRNPA1 PE=1 SV=2	HNRNPA1	20966.2	28470.4	30960.7	25300.3	22132.2	26412.3	23547.7	25973.2	27880.8	27964.6
60S acidic ribosomal protein P0 OS=Homo sapiens OX=9606 GN=RPLP0 PE=1 SV=1	RPLP0	12126.9	15672.7	13865.7	16044.7	13510.8	14744.5	16603.6	15262.8	16087.6	14986.3
Replication stress response regulator SDE2 OS=Homo sapiens OX=9606 GN=SDE2 PE=1 SV=1	SDE2	51.8	63	58.2	72.1	57.6	65.2	64.5	66.8	77.1	57.7
Cytochrome b-c1 complex subunit 7 OS=Homo sapiens OX=9606 GN=UQCRB PE=1 SV=2	UQCRB	314.9	528.6	666	405.4	389	396.5	357.9	391.2	483.8	658.2
Profilin-1 OS=Homo sapiens OX=9606 GN=PFN1 PE=1 SV=2	PFN1	7833.1	10270.1	13044.2	8435	6914.9	9847.6	8531.9	9800.5	11110.1	12781.6
Partner of Y14 and mago OS=Homo sapiens OX=9606 GN=PYM1 PE=1 SV=1	PYM1	680.9	850.6	757.3	874.9	702.1	759.4	876.1	809.3	862.6	839.2
Poly [ADP-ribose] polymerase 1 OS=Homo sapiens OX=9606 GN=PARP1 PE=1 SV=4	PARP1	10534.8	18516.2	13403.3	16452.8	16349.9	12268.3	20774.3	20411.3	16469.6	17708.2
SUZ domain-containing protein 1 OS=Homo sapiens OX=9606 GN=SZRD1 PE=1 SV=1	SZRD1	223.6	289.4	267.2	298	234.7	297.5	285.9	285.4	288.1	298.8
Solute carrier family 35 member F6 OS=Homo sapiens OX=9606 GN=SLC35F6 PE=1 SV=1	SLC35F6	43.4	63.2	60.4	63.6	47	54.6	55	54.7	67.5	59.9
E3 ubiquitin-protein ligase RNF181 (Fragment) OS=Homo sapiens OX=9606 GN=RNF181 PE=1 SV=1	RNF181	30.2	40.3	35	40.3	35.7	38	46.9	40.3	32.7	33.5
Angiomotin OS=Homo sapiens OX=9606 GN=AMOT PE=1 SV=1	AMOT	275	365.7	349.7	377.1	310.4	396.5	333.7	373.4	377.5	385.7
Pyruvate dehydrogenase E1 component subunit alpha, somatic form, mitochondrial OS=Homo sapiens OX=9606 GN=PDHA1 PE=1 SV=3	PDHA1	1099.2	1391.8	1377.5	1335.3	1229.8	1545.6	1432.4	1439.2	1462.2	1358
Histone H1.10 OS=Homo sapiens OX=9606 GN=H1-10 PE=1 SV=1	H1-10	441.2	723.8	446.4	869.1	697.8	555.2	800.5	806.1	596.8	601.3
LanC-like protein 2 OS=Homo sapiens OX=9606 GN=LANCL2 PE=1 SV=1	LANCL2	83.9	103.3	104.1	121.8	87.5	105.4	106.2	102.7	106	105.6
Rab3 GTPase-activating protein non-catalytic subunit OS=Homo sapiens OX=9606 GN=RAB3GAP2 PE=1 SV=1	RAB3GAP2	95	114.1	97.8	124.7	100.6	118.7	117.4	119.8	110.9	118
Adhesion G-protein-coupled receptor F1 OS=Homo sapiens OX=9606 GN=ADGRF1 PE=1 SV=1	ADGRF1	80.5	101.9	84.3	108.5	78.1	92.3	107	91.7	108.5	89.2
Eukaryotic translation initiation factor 3 subunit G OS=Homo sapiens OX=9606 GN=EIF3G PE=1 SV=2	EIF3G	273.3	268.4	295.8	252.9	239.2	268.3	276.1	266.4	265	312.2
28S ribosomal protein S11, mitochondrial OS=Homo sapiens OX=9606 GN=MRPS11 PE=1 SV=2	MRPS11	340.1	514.3	428.3	445.3	457.8	427.2	493.7	473.1	461.8	461.9
28S ribosomal protein S2, mitochondrial OS=Homo sapiens OX=9606 GN=MRPS2 PE=1 SV=1	MRPS2	856.3	1239.4	1041.9	1208.5	1216.2	1068.1	1353.2	1251.3	1208.6	1111
Pyruvate kinase OS=Homo sapiens OX=9606 GN=PKM PE=1 SV=1	PKM	88.7	96.6	90.7	118.3	87.5	111.5	110.6	112.6	115.3	99.6
Parafibromin OS=Homo sapiens OX=9606 GN=CDC73 PE=1 SV=1	CDC73	318.3	390.9	352	432.5	427.7	373.8	524.6	460.7	432.5	428.8
NADH dehydrogenase [ubiquinone] flavoprotein 2, mitochondrial OS=Homo sapiens OX=9606 GN=NDUFV2 PE=1 SV=1	NDUFV2	809.3	1054.1	1135.9	936.4	851	1025.4	977.2	977.6	1152.4	978.5
Probable ATP-dependent RNA helicase DHX37 OS=Homo sapiens OX=9606 GN=DHX37 PE=1 SV=1	DHX37	18.8	35.3	26.2	38	34.1	27.8	36.3	38.9	35.6	29.8
BRCA1-associated ATM activator 1 OS=Homo sapiens OX=9606 GN=BRAT1 PE=1 SV=2	BRAT1	320.6	400.4	363.7	468.8	333.5	409.8	412.2	384	407.5	383.5
40S ribosomal protein S9 OS=Homo sapiens OX=9606 GN=RPS9 PE=1 SV=3	RPS9	2615.8	3420.6	2886	3563.8	3988.3	2283	4513.2	3719.5	3559.4	3256.1
NADH dehydrogenase [ubiquinone] 1 alpha subcomplex subunit 7 OS=Homo sapiens OX=9606 GN=NDUFA7 PE=1 SV=3	NDUFA7	181.9	272.4	301.6	253.7	223.9	246.2	209.1	238.7	253.5	308.3
Actin-related protein 2/3 complex subunit 1B OS=Homo sapiens OX=9606 GN=ARPC1B PE=1 SV=3	ARPC1B	128.7	178.6	142.1	205.9	167.8	169.6	183.5	183	177.2	171.4
Eukaryotic translation initiation factor 3 subunit I OS=Homo sapiens OX=9606 GN=EIF3I PE=1 SV=1	EIF3I	3129	3748.5	3801.5	3635.5	2865.8	3927	3709.1	3728.6	3935.9	3729.7
Nucleoside diphosphate kinase A OS=Homo sapiens OX=9606 GN=NME1 PE=1 SV=1	NME1	1593	2017.7	1918.8	1959.9	1441.6	1998.8	1942	1862.2	2056.1	1684
SNARE-associated protein Snapin OS=Homo sapiens OX=9606 GN=SNAPIN PE=1 SV=1	SNAPIN	46.9	70.8	80.1	71.3	47	58.8	63.2	65.6	81.6	81
Aldo-keto reductase family 1 member B1 OS=Homo sapiens OX=9606 GN=AKR1B1 PE=1 SV=3	AKR1B1	5065.8	5750.4	5507.7	6245	4598.4	6349.7	6027.7	5761.2	5772.7	5427.6
Haloacid dehalogenase-like hydrolase domain-containing 5 OS=Homo sapiens OX=9606 GN=HDHD5 PE=1 SV=1	HDHD5	344.3	495.1	448.8	462	431	431.5	480	480	464.3	431.1
Ubiquinol-cytochrome-c reductase complex assembly factor 1 OS=Homo sapiens OX=9606 GN=UQCC1 PE=1 SV=3	UQCC1	95.8	136.9	110.6	133.8	113.5	118.6	141.8	123.9	133.6	122.7
Armadillo repeat-containing X-linked protein 3 OS=Homo sapiens OX=9606 GN=ARMCX3 PE=1 SV=1	ARMCX3	29.9	42.8	37	32.9	40	31.7	43.9	40.4	35	38.4
WD repeat-containing protein 75 OS=Homo sapiens OX=9606 GN=WDR75 PE=1 SV=1	WDR75	958	1372.5	1191.2	1423.4	1267.1	1269.8	1406.8	1370	1260.8	1279.8
Farnesyl pyrophosphate synthase OS=Homo sapiens OX=9606 GN=FDPS PE=1 SV=4	FDPS	1310	1623.7	1377.1	1759.7	1252.7	1640.5	1671.9	1550.7	1495.5	1382.5
Splicing factor 3A subunit 1 OS=Homo sapiens OX=9606 GN=SF3A1 PE=1 SV=1	SF3A1	8058.6	10271.8	9708.9	11250.1	8549.1	11118.8	10536.6	10232.1	10463.6	9937.8
39S ribosomal protein L19, mitochondrial OS=Homo sapiens OX=9606 GN=MRPL19 PE=1 SV=2	MRPL19	181.3	226.7	209.9	241.4	211.3	251.3	231.9	236.1	238.7	242.2
Ribonuclease T2 (Fragment) OS=Homo sapiens OX=9606 GN=RNASET2 PE=1 SV=8	RNASET2	23.4	42.6	57.7	19.3	23.5	29.3	24.1	26.8	35	43.8
Dihydroxyacetone phosphate acyltransferase (Fragment) OS=Homo sapiens OX=9606 GN=GNPAT PE=1 SV=1	GNPAT	129.6	177.5	169.4	183.7	161.3	184.8	188.3	180.2	173.5	171.3
Splicing factor 3B subunit 1 OS=Homo sapiens OX=9606 GN=SF3B1 PE=1 SV=3	SF3B1	6736.1	9296.2	7871.4	9769.7	8658.7	8434.9	10170.6	9993.5	9281.9	9277.6
HCG2044781 OS=Homo sapiens OX=9606 GN=PEDS1-UBE2V1 PE=1 SV=1	PEDS1-UBE2V1	252.2	283.2	292	251.7	216.3	313.2	290.3	274.5	290.2	305.5
U1 small nuclear ribonucleoprotein C OS=Homo sapiens OX=9606 GN=SNRPC PE=1 SV=1	SNRPC	966.9	1907.6	2334.1	1153.4	938.1	1211.3	954.3	1329.7	1744	1871
Protein LLP homolog OS=Homo sapiens OX=9606 GN=LLPH PE=1 SV=1	LLPH	31.2	34.7	31.2	39.5	44.9	29.1	39.7	40.6	39.4	40.4
Cystatin-B OS=Homo sapiens OX=9606 GN=CSTB PE=1 SV=2	CSTB	3002.7	4219.8	4209.5	2683.7	2213.7	3758.1	3246.6	3602.8	4298.5	4035.4
DNA-directed RNA polymerases I, II, and III subunit RPABC3 (Fragment) OS=Homo sapiens OX=9606 GN=POLR2H PE=1 SV=8	POLR2H	1141.9	1344.9	1295.1	1449.1	1208.5	1352.1	1413.2	1377.3	1415.1	1387.1
3-ketoacyl-CoA thiolase, peroxisomal OS=Homo sapiens OX=9606 GN=ACAA1 PE=1 SV=2	ACAA1	342.8	466.9	505.2	419.7	377	504.4	478.4	484.5	549	421.9
CTP synthase 1 OS=Homo sapiens OX=9606 GN=CTPS1 PE=1 SV=2	CTPS1	4824.2	6483.3	5378.5	6220.8	5527.7	5575	6672.2	6420.1	6196.5	5964.3
Protein S100-A10 OS=Homo sapiens OX=9606 GN=S100A10 PE=1 SV=2	S100A10	612.4	706.2	779.2	700.6	617.9	710.4	723.1	696.7	773.4	784.9
CD2-associated protein OS=Homo sapiens OX=9606 GN=CD2AP PE=1 SV=1	CD2AP	1298.4	1788.5	1570.3	1682.8	1311.1	1679.6	1549.5	1492.7	1678.8	1500.3
Hepatoma-derived growth factor OS=Homo sapiens OX=9606 GN=HDGF PE=1 SV=1	HDGF	3935.9	5708.4	4853.7	5653.7	3891.5	5548.5	4779.6	5159.8	5155.4	5201.8
BAG family molecular chaperone regulator 5 (Fragment) OS=Homo sapiens OX=9606 GN=BAG5 PE=1 SV=1	BAG5	38.7	44.3	42.8	53.4	39.6	43.7	48	45.5	43.3	52.7
Fermitin family homolog 2 (Fragment) OS=Homo sapiens OX=9606 GN=FERMT2 PE=1 SV=1	FERMT2	325.2	425.3	345	432.7	378.1	406.9	497.2	490.6	431	402
Transcriptional activator protein Pur-alpha OS=Homo sapiens OX=9606 GN=PURA PE=1 SV=2	PURA	594.9	731.9	725.4	782	636.7	744	752	698	765.2	750.8
Nucleolar protein 6 OS=Homo sapiens OX=9606 GN=NOL6 PE=1 SV=1	NOL6	212.4	352	261.9	348.6	317.1	322.9	344.3	381.8	337.5	362.9
Valine--tRNA ligase OS=Homo sapiens OX=9606 GN=VARS1 PE=1 SV=4	VARS1	2082	2902.7	2279.1	2968	2452.4	2604	3194.1	3021.2	2874.6	2797.3
Splicing factor 3B subunit 6 OS=Homo sapiens OX=9606 GN=SF3B6 PE=1 SV=1	SF3B6	1730.4	2311.6	2282.4	1886	1935.3	1984.4	2383.4	2197.3	2445.7	2213.2
Probable ATP-dependent RNA helicase DDX47 OS=Homo sapiens OX=9606 GN=DDX47 PE=1 SV=1	DDX47	1717.7	2812.1	2109.1	2711.3	2499.5	2201	2878.4	2863.5	2460.5	2622.3
Cytochrome c oxidase assembly factor 6 homolog OS=Homo sapiens OX=9606 GN=COA6 PE=1 SV=1	COA6	247.1	364.2	389.7	288	247.8	309	240.9	324.7	357.2	404.9
WD repeat-containing protein 41 (Fragment) OS=Homo sapiens OX=9606 GN=WDR41 PE=1 SV=1	WDR41	40.4	36.8	45.5	46.5	39.4	45.4	57.9	48.3	50.8	43.8
Probable 18S rRNA (guanine-N(7))-methyltransferase (Fragment) OS=Homo sapiens OX=9606 GN=BUD23 PE=1 SV=1	BUD23	122.8	157.7	128.4	157.8	145.6	134.8	168.4	173.7	147	166.3
Clathrin light chain A OS=Homo sapiens OX=9606 GN=CLTA PE=1 SV=1	CLTA	1849.2	2317.4	2087.8	2481.5	1826.8	2391.7	2138.2	2215.5	2194.2	2240.2
Methionine aminopeptidase 2 OS=Homo sapiens OX=9606 GN=METAP2 PE=1 SV=1	METAP2	69.7	91.4	72.7	100.3	93.9	70.5	99.4	84.2	99.7	92.4
Heterogeneous nuclear ribonucleoprotein M OS=Homo sapiens OX=9606 GN=HNRNPM PE=1 SV=3	HNRNPM	21404.1	28522.9	29102.6	26188.1	23072.9	28574.4	25213.2	26467.1	26592.5	26360.5
E3 ubiquitin-protein ligase OS=Homo sapiens OX=9606 GN=ITCH PE=1 SV=1	ITCH	170.1	212.5	174.5	206.2	172.4	188.6	225.4	212.2	205	188.3
Transmembrane emp24 domain-containing protein 1 OS=Homo sapiens OX=9606 GN=TMED1 PE=1 SV=1	TMED1	50.8	75.4	64.9	65.7	61.2	61.2	67.3	76.8	70.7	69.9
FAS-associated factor 1 OS=Homo sapiens OX=9606 GN=FAF1 PE=1 SV=2	FAF1	340.6	415.1	392.8	445.6	323.8	425.8	424.1	404.7	432.3	377
Nuclear autoantigenic sperm protein OS=Homo sapiens OX=9606 GN=NASP PE=1 SV=2	NASP	6588.2	7572.6	7231.3	8509.1	6310.5	8229.4	7928.7	7591.8	7824.1	7510.4
ESF1 homolog OS=Homo sapiens OX=9606 GN=ESF1 PE=1 SV=1	ESF1	395.9	642.5	485.4	662.7	586.2	578.8	656.5	658.2	567.3	632.9
Coiled-coil domain-containing protein 53 OS=Homo sapiens OX=9606 GN=WASHC3 PE=1 SV=1	WASHC3	20.1	26.7	22.9	31	24	27.3	28.9	24.2	30.8	25.4
THO complex subunit 7 homolog OS=Homo sapiens OX=9606 GN=THOC7 PE=1 SV=1	THOC7	361.9	530.2	468.3	507.9	396.4	499.9	444.7	496.4	486.9	466.5
Nuclear-interacting partner of ALK OS=Homo sapiens OX=9606 GN=ZC3HC1 PE=1 SV=1	ZC3HC1	509.1	583.2	596.1	717.6	574.7	693.1	629.8	631.8	607.1	624
40S ribosomal protein S12 OS=Homo sapiens OX=9606 GN=RPS12 PE=1 SV=3	RPS12	7325.6	8922.1	9619.6	8067	6648.9	9133.2	8004.2	8561.2	9553.6	9453.8
2-amino-3-ketobutyrate coenzyme A ligase, mitochondrial OS=Homo sapiens OX=9606 GN=GCAT PE=1 SV=1	GCAT	104	130.5	129.8	133.7	122.5	122.5	138.6	130.4	132.8	140.6
Small nuclear ribonucleoprotein Sm D3 OS=Homo sapiens OX=9606 GN=SNRPD3 PE=1 SV=1	SNRPD3	498.2	635.3	554.7	625.5	582.1	570.7	652.9	630.2	621.3	619.4
Cellular nucleic acid-binding protein OS=Homo sapiens OX=9606 GN=CNBP PE=1 SV=1	CNBP	3805.9	3682.3	4099.9	4613.5	3633.7	4608.3	4679.4	4580.6	4581.2	4092.2
YEATS domain-containing protein 4 OS=Homo sapiens OX=9606 GN=YEATS4 PE=1 SV=1	YEATS4	235.5	370.9	297.7	362.9	320.6	318.8	394	310.1	360.5	276.5
Cytochrome c oxidase copper chaperone OS=Homo sapiens OX=9606 GN=COX17 PE=1 SV=2	COX17	1215.5	1552.1	1573.2	1673.6	1392.4	1619.8	1626	1525.4	1661.3	1299.3
Gem-associated protein 6 OS=Homo sapiens OX=9606 GN=GEMIN6 PE=1 SV=1	GEMIN6	32.8	57.9	47.7	57	35.5	60.7	53.9	46.6	56.6	57.1
Protein flightless-1 homolog OS=Homo sapiens OX=9606 GN=FLII PE=1 SV=2	FLII	62.3	94	72.6	85.5	96.1	57.9	100.9	76.9	90	70.8
NudC domain-containing protein 3 OS=Homo sapiens OX=9606 GN=NUDCD3 PE=1 SV=3	NUDCD3	450.3	532.9	521.8	582.5	442.8	580.6	539.7	545.4	578.4	536.6
ATP synthase subunit epsilon-like protein, mitochondrial OS=Homo sapiens OX=9606 GN=ATP5F1EP2 PE=1 SV=1	ATP5F1EP2	80.3	93.3	127.1	90.4	81.7	90.7	104.3	93.3	108.4	93.1
Protein CCSMST1 OS=Homo sapiens OX=9606 GN=CCSMST1 PE=2 SV=1	CCSMST1	45	63.6	58.1	50.2	59.8	60.7	63.3	60.9	70	68.2
AT-rich interactive domain-containing protein 3A OS=Homo sapiens OX=9606 GN=ARID3A PE=1 SV=2	ARID3A	159	212.8	215.5	213.4	161	214.3	199.5	196	211.7	216.4
Ribosome biogenesis protein BOP1 OS=Homo sapiens OX=9606 GN=BOP1 PE=1 SV=2	BOP1	840.1	1237	981.6	1254.4	1189.7	1028.3	1333.7	1306	1243.7	1237.1
Tetratricopeptide repeat protein 27 OS=Homo sapiens OX=9606 GN=TTC27 PE=1 SV=1	TTC27	32	34.9	43	46.7	37.9	42.5	46.5	39.4	40	43.2
WD repeat-containing protein 43 OS=Homo sapiens OX=9606 GN=WDR43 PE=1 SV=3	WDR43	666.6	870.9	810.2	885.7	921.3	830	957.2	887.3	864.4	832.6
Septin-6 OS=Homo sapiens OX=9606 GN=SEPTIN6 PE=1 SV=4	SEPTIN6	334	463	412.1	486.3	384.4	448.7	471.5	456.1	452.4	401.8
Microtubule-associated protein 1S OS=Homo sapiens OX=9606 GN=MAP1S PE=1 SV=2	MAP1S	183.9	273.3	226.7	295.5	230.9	248.4	278.4	252.5	271.2	238.4
Elongation factor-like GTPase 1 OS=Homo sapiens OX=9606 GN=EFL1 PE=1 SV=2	EFL1	280.8	322	303.7	370.3	270.6	338.2	344.4	327.2	323	308.2
Phosphatidylinositol transfer protein beta isoform OS=Homo sapiens OX=9606 GN=PITPNB PE=1 SV=2	PITPNB	1615.2	2118.8	1822.3	2184.4	1770.2	2011.1	2414	2187.3	2089	1881.2
Anaphase-promoting complex subunit 5 OS=Homo sapiens OX=9606 GN=ANAPC5 PE=1 SV=2	ANAPC5	70.5	84	74.4	80.4	87.9	71.8	93.3	78.7	87.2	86.8
Nucleolar protein 16 OS=Homo sapiens OX=9606 GN=NOP16 PE=1 SV=2	NOP16	696.8	1206.7	882.7	1073.1	1216.5	773.2	1291.6	1248.2	1063.4	1179.7
Cleavage and polyadenylation specificity factor subunit 1 OS=Homo sapiens OX=9606 GN=CPSF1 PE=1 SV=2	CPSF1	630.4	888	742.8	928.7	818.5	784.5	911.7	850.5	843.4	835.9
Heat shock 70 kDa protein 1B OS=Homo sapiens OX=9606 GN=HSPA1B PE=1 SV=1	HSPA1B	97665.8	103126	106600	119405	95550.7	118481	122382	112674	115865	112763
ATP synthase-coupling factor 6, mitochondrial OS=Homo sapiens OX=9606 GN=ATP5PF PE=1 SV=1	ATP5PF	562.9	885.8	894.8	682	651.5	700.9	649.9	695.5	835.8	811.3
Vesicle-fusing ATPase OS=Homo sapiens OX=9606 GN=NSF PE=1 SV=3	NSF	2951.4	3660	3350.8	3964.4	3294.4	3671	3878.1	3680.9	3752.1	3500
Sorting nexin-27 OS=Homo sapiens OX=9606 GN=SNX27 PE=1 SV=2	SNX27	97.5	111.1	105.7	128.9	103.6	119.6	131	120.9	127.6	115
Thioredoxin-dependent peroxide reductase, mitochondrial OS=Homo sapiens OX=9606 GN=PRDX3 PE=1 SV=3	PRDX3	2351.4	2892.7	3068.8	2982.3	2748.1	2942.9	2943.6	2864	2966	2776.9
Annexin A7 OS=Homo sapiens OX=9606 GN=ANXA7 PE=1 SV=3	ANXA7	925.9	1155	1044.8	1198.6	866.9	1177.1	1175.7	1101.9	1112.2	1072.9
S-adenosylmethionine synthase isoform type-2 OS=Homo sapiens OX=9606 GN=MAT2A PE=1 SV=1	MAT2A	2643.4	3308.6	3022.6	3450.5	2614.1	3288.4	3507.4	3147.4	3395.5	3018.1
ATP synthase subunit delta, mitochondrial OS=Homo sapiens OX=9606 GN=ATP5F1D PE=1 SV=2	ATP5F1D	346.1	477.4	489.7	477.4	409.3	476.3	429.4	450.4	474.5	465.4
YTH domain-containing family protein 1 OS=Homo sapiens OX=9606 GN=YTHDF1 PE=1 SV=1	YTHDF1	35.6	49	49.7	46.1	35.6	40.8	57	42.9	68.6	40.5
Transcription initiation factor IIB OS=Homo sapiens OX=9606 GN=GTF2B PE=1 SV=1	GTF2B	105.4	115.7	106.8	136.9	109.7	119.3	119.9	121	121.2	124.8
Thioredoxin-related transmembrane protein 1 OS=Homo sapiens OX=9606 GN=TMX1 PE=1 SV=1	TMX1	47.3	79.9	60.3	46.5	73.2	51	81.2	75.9	70.6	83.3
Prothymosin alpha (Fragment) OS=Homo sapiens OX=9606 GN=PTMA PE=1 SV=1	PTMA	2960.1	3396.4	3229.6	3715.2	2790	3679.3	3545.4	3359.5	3539.3	3469.8
Replication factor C subunit 3 OS=Homo sapiens OX=9606 GN=RFC3 PE=1 SV=2	RFC3	233.9	366.6	301.4	344.9	316.9	287.9	383.2	368.2	341.1	311
Cellular tumor antigen p53 OS=Homo sapiens OX=9606 GN=TP53 PE=1 SV=1	TP53	1094.3	1435.8	1415.2	1279.8	1283.2	1251.5	1498.6	1445.5	1481.8	1458.3
Serine/arginine-rich splicing factor 1 OS=Homo sapiens OX=9606 GN=SRSF1 PE=1 SV=1	SRSF1	8191.2	12017	12548.5	10007.1	8107.3	10174.7	8214.4	10095.8	11224.6	12188.2
GPN-loop GTPase 1 OS=Homo sapiens OX=9606 GN=GPN1 PE=1 SV=1	GPN1	41	57.5	47.1	56	62.8	45.7	60.9	54.3	55.4	59.7
mRNA cap guanine-N7 methyltransferase OS=Homo sapiens OX=9606 GN=RNMT PE=1 SV=1	RNMT	190	233.1	227	250.4	186.3	236.1	248.3	242.5	242.4	202.4
COX assembly mitochondrial protein homolog OS=Homo sapiens OX=9606 GN=CMC1 PE=1 SV=1	CMC1	116.5	159.7	166.6	150.3	119.8	149.9	128.4	137.9	148.6	153.6
40S ribosomal protein SA OS=Homo sapiens OX=9606 GN=RPSA PE=1 SV=4	RPSA	6010.8	6651	6831.6	7362.9	5927.2	7157	7252	6813.4	7277.3	6777.2
ElaC homolog protein 2 OS=Homo sapiens OX=9606 GN=ELAC2 PE=1 SV=1	ELAC2	743.1	977.5	889.3	965	990.8	715.4	1091.5	938.9	996	869.2
Kinetochore protein Spc24 (Fragment) OS=Homo sapiens OX=9606 GN=SPC24 PE=1 SV=1	SPC24	821.3	1004.8	1158.7	882	725.6	1020.6	951.3	1001.8	1183.7	1170.8
Neurofilament light polypeptide OS=Homo sapiens OX=9606 GN=NEFL PE=1 SV=3	NEFL	106.3	141.6	156.3	142.3	117.5	132.1	137.5	143.7	155.1	141.4
Selenide, water dikinase 1 OS=Homo sapiens OX=9606 GN=SEPHS1 PE=1 SV=2	SEPHS1	227.5	247.6	269.5	250.1	219.2	278.2	289.5	242.2	311	249.2
Ankyrin repeat domain-containing protein 17 OS=Homo sapiens OX=9606 GN=ANKRD17 PE=1 SV=3	ANKRD17	317.7	374	368.4	424.5	302.5	394.5	387.2	364	383.4	364.7
3'(2'),5'-bisphosphate nucleotidase 1 OS=Homo sapiens OX=9606 GN=BPNT1 PE=1 SV=1	BPNT1	1204	1395.6	1363	1483.1	1218.8	1454.9	1496	1439	1456.9	1474.5
COP9 signalosome complex subunit 9 OS=Homo sapiens OX=9606 GN=COPS9 PE=1 SV=3	COPS9	49.3	62.5	51.6	51.9	43.5	53.2	51.4	54.4	59.4	54.2
Eukaryotic peptide chain release factor subunit 1 OS=Homo sapiens OX=9606 GN=ETF1 PE=1 SV=3	ETF1	5346.6	6811.5	6343.4	7458.2	6174.6	6625.1	8019.4	7507.2	7364.8	6876.1
Protein FAM98A OS=Homo sapiens OX=9606 GN=FAM98A PE=1 SV=2	FAM98A	564	867.1	679.4	881.1	694.6	698.6	881	865	764.8	830.7
Protein FAM133A OS=Homo sapiens OX=9606 GN=FAM133A PE=1 SV=1	FAM133A	96.3	181.4	94.7	157.1	122	119.5	141.3	157.5	125.9	150.4
26S proteasome regulatory subunit 6A OS=Homo sapiens OX=9606 GN=PSMC3 PE=1 SV=3	PSMC3	6126.2	7460.6	7645.2	6373.3	5380	7603.8	6950.3	6915.9	7196.1	7187.5
NAD-dependent protein deacetylase sirtuin-1 OS=Homo sapiens OX=9606 GN=SIRT1 PE=1 SV=2	SIRT1	275.1	365	334.5	419.1	295.5	387.9	389.7	344.2	395.5	335.5
Nucleolar complex protein 4 homolog OS=Homo sapiens OX=9606 GN=NOC4L PE=1 SV=1	NOC4L	859.6	1234.7	1054.3	1254.3	1151.6	1096.2	1253.4	1258.8	1134.9	1199.2
E3 ubiquitin-protein ligase Midline-1 OS=Homo sapiens OX=9606 GN=MID1 PE=4 SV=1	MID1	447.1	624	491.4	634.2	566	554	668.2	629.4	602.5	619.8
Histone acetyltransferase type B catalytic subunit OS=Homo sapiens OX=9606 GN=HAT1 PE=1 SV=1	HAT1	1380.7	1601.1	1516.7	1894.4	1584	1596.3	1861.3	1830.1	1826.1	1797.1
Elongation factor G, mitochondrial OS=Homo sapiens OX=9606 GN=GFM1 PE=1 SV=2	GFM1	300.5	500.4	401.3	447.3	429.2	412.6	456.5	448.6	441.4	430.4
Engulfment and cell motility protein 2 OS=Homo sapiens OX=9606 GN=ELMO2 PE=1 SV=1	ELMO2	126.8	129	129.7	160.1	138.5	142.9	140.3	151.9	135.4	157.1
Tudor and KH domain-containing protein OS=Homo sapiens OX=9606 GN=TDRKH PE=1 SV=1	TDRKH	117.6	141.5	130.7	145	130.1	143.4	143.5	146.7	139.7	160.5
NADH dehydrogenase [ubiquinone] 1 beta subcomplex subunit 8, mitochondrial OS=Homo sapiens OX=9606 GN=NDUFB8 PE=1 SV=1	NDUFB8	58	94.2	66.8	70.9	65.6	75.8	85.1	73.6	65.5	74.4
Poly(rC)-binding protein 3 OS=Homo sapiens OX=9606 GN=PCBP3 PE=1 SV=1	PCBP3	108.8	126.5	117.6	136.2	101.2	134.9	132.7	114.6	122	120.7
Peptidyl-prolyl cis-trans isomerase NIMA-interacting 1 OS=Homo sapiens OX=9606 GN=PIN1 PE=1 SV=1	PIN1	817	1142.9	1249.3	743.3	732.4	1011.3	898.2	1107.2	1305.5	1366.8
Apoptotic chromatin condensation inducer in the nucleus OS=Homo sapiens OX=9606 GN=ACIN1 PE=1 SV=2	ACIN1	3357.3	4183.5	4095.8	4600.9	3773	4633.3	4240.3	4288.1	4477.8	4304.2
Ataxin-2-like protein OS=Homo sapiens OX=9606 GN=ATXN2L PE=1 SV=2	ATXN2L	2094.2	2671.3	2562.3	2720.9	2106.2	2651.9	2563.2	2352.9	2689.9	2385
BTB/POZ domain-containing protein KCTD12 OS=Homo sapiens OX=9606 GN=KCTD12 PE=1 SV=1	KCTD12	937.1	1129.7	1053.5	1226.5	910.2	1225.7	1130.1	1108.5	1199.9	1155.1
Replication factor C subunit 2 OS=Homo sapiens OX=9606 GN=RFC2 PE=1 SV=3	RFC2	681.4	855.8	786.4	972.9	753.3	861.5	867.8	876.7	788.9	818.7
Isochorismatase domain-containing protein 1 OS=Homo sapiens OX=9606 GN=ISOC1 PE=1 SV=3	ISOC1	1098.3	1313.9	1259	1450.7	1062.1	1360.1	1376.8	1293.9	1364.3	1244.3
DNA-directed RNA polymerase II subunit RPB9 OS=Homo sapiens OX=9606 GN=POLR2I PE=1 SV=1	POLR2I	93.3	119	121.3	127.1	108.4	122.2	120.6	108.8	129.8	105.1
Lysine-rich nucleolar protein 1 OS=Homo sapiens OX=9606 GN=KNOP1 PE=1 SV=1	KNOP1	391	863.8	497.4	803.4	843.4	484	900.4	909.7	673.3	819.4
Sorting nexin-12 OS=Homo sapiens OX=9606 GN=SNX12 PE=1 SV=1	SNX12	114.7	137.9	137.5	145	112.4	141.5	139.8	127	161.4	136.7
Metastasis-associated protein MTA1 OS=Homo sapiens OX=9606 GN=MTA1 PE=1 SV=1	MTA1	10.1	16.6	14.2	16.4	19.2	12.5	19.4	20.9	16.1	16.6
Putative monooxygenase p33MONOX OS=Homo sapiens OX=9606 GN=KIAA1191 PE=1 SV=1	KIAA1191	47.1	70.8	70.2	65.9	51.6	58.3	51.7	54.9	72.6	69.2
Guanine nucleotide-binding protein-like 3 OS=Homo sapiens OX=9606 GN=GNL3 PE=1 SV=2	GNL3	1390	2201.6	1772.5	2092.2	2121.1	1663.8	2407.3	2290.8	2062.5	2097.7
V-type proton ATPase subunit E 1 OS=Homo sapiens OX=9606 GN=ATP6V1E1 PE=1 SV=1	ATP6V1E1	1403.3	1794.6	1717.8	1693.7	1427.3	1835.7	1756.7	1690.5	1815.7	1616.4
WD repeat-containing protein 46 (Fragment) OS=Homo sapiens OX=9606 GN=WDR46 PE=1 SV=1	WDR46	115.6	199.7	137.2	196.2	204.3	143.1	238.2	248.1	182.3	222.6
DNA polymerase OS=Homo sapiens OX=9606 GN=POLD1 PE=1 SV=1	POLD1	293.3	377.6	312.7	380.2	329.8	349.2	387.3	366	374.6	362.4
Heat shock cognate 71 kDa protein (Fragment) OS=Homo sapiens OX=9606 GN=HSPA8 PE=1 SV=8	HSPA8	758.6	1112.5	813.5	998.8	729.6	938.2	1026.8	855.2	1023.4	847.4
Huntingtin OS=Homo sapiens OX=9606 GN=HTT PE=1 SV=2	HTT	35	48	42.6	52.9	43.1	44	47.9	46.2	52.1	42.4
Protein PRRC2C OS=Homo sapiens OX=9606 GN=PRRC2C PE=1 SV=4	PRRC2C	4474	5719.1	5183.2	5998.7	4665.4	5622.3	5789.7	5257.6	5657.5	5301.1
Palladin OS=Homo sapiens OX=9606 GN=PALLD PE=1 SV=3	PALLD	409.8	490.3	519.9	415.6	405.9	451.9	513.6	463	556.1	459.2
Mitochondrial import inner membrane translocase subunit Tim23 OS=Homo sapiens OX=9606 GN=TIMM23 PE=1 SV=1	TIMM23	649.4	861.7	831.7	663.9	781.4	742.9	941.7	818.8	914.1	884.1
Serine/arginine-rich splicing factor 3 OS=Homo sapiens OX=9606 GN=SRSF3 PE=1 SV=1	SRSF3	739.9	1283.8	1557.7	568.2	604.8	914.9	812.4	1096.4	1311.5	1552.4
Glyoxalase domain-containing protein 4 OS=Homo sapiens OX=9606 GN=GLOD4 PE=1 SV=1	GLOD4	2398.8	2935.3	2982.9	2510.9	2015.5	2966.2	2852.7	2784.2	2989.3	2800.9
Y-box-binding protein 1 OS=Homo sapiens OX=9606 GN=YBX1 PE=1 SV=3	YBX1	2795.9	3712.3	3330.2	4017.4	3090.2	3506.9	3787.1	3495.6	3579.5	3444
Golgi integral membrane protein 4 OS=Homo sapiens OX=9606 GN=GOLIM4 PE=1 SV=1	GOLIM4	57.6	82.7	68.3	69.6	64	71.2	80	67.6	79.3	88.1
Protein arginine N-methyltransferase 1 OS=Homo sapiens OX=9606 GN=PRMT1 PE=1 SV=1	PRMT1	7539.6	9428.5	8642.8	10215.6	8180.2	9314.4	9882.6	9379.8	9500.8	9009
MORF4 family-associated protein 1 OS=Homo sapiens OX=9606 GN=MRFAP1 PE=1 SV=1	MRFAP1	150.7	194.2	196	176.5	145.5	186.2	182.3	184.6	214.2	191
GTP-binding protein 1 OS=Homo sapiens OX=9606 GN=GTPBP1 PE=1 SV=3	GTPBP1	50.1	80.5	69.7	74.5	65.9	69.6	84.1	73.2	65.5	67
Calcium/calmodulin-dependent protein kinase type 1 OS=Homo sapiens OX=9606 GN=CAMK1 PE=1 SV=1	CAMK1	343.7	427.9	382.7	457.8	359.5	415.2	433	425.2	443.3	407.1
General transcription factor 3C polypeptide 3 OS=Homo sapiens OX=9606 GN=GTF3C3 PE=1 SV=1	GTF3C3	523.5	693.9	626.5	762.4	644.3	652.8	700.9	718.7	634.7	666
Vacuolar-sorting protein SNF8 OS=Homo sapiens OX=9606 GN=SNF8 PE=1 SV=1	SNF8	38	47.5	36.4	45.1	38.4	35.6	48	41.3	37.5	46.5
RNA-binding protein 42 OS=Homo sapiens OX=9606 GN=RBM42 PE=1 SV=1	RBM42	120.9	164.2	191.9	117.3	130.4	149.2	132.8	164.3	179.1	178.9
Cleavage and polyadenylation specificity factor subunit 6 OS=Homo sapiens OX=9606 GN=CPSF6 PE=1 SV=1	CPSF6	2713.1	3332	3240	3497.6	2820.7	3428.1	3367.2	3301.1	3418.1	3190.1
Ubiquitin-conjugating enzyme E2 C OS=Homo sapiens OX=9606 GN=UBE2C PE=1 SV=1	UBE2C	424.2	554	590.7	450.8	354.7	523.4	513.7	517.6	585.2	562.5
Mitotic checkpoint protein BUB3 OS=Homo sapiens OX=9606 GN=BUB3 PE=1 SV=1	BUB3	3183.7	3848.1	3817.5	4056.7	3270.6	3809.8	4068	3773.4	3988.1	3739.5
Protein kinase C and casein kinase substrate in neurons protein 2 OS=Homo sapiens OX=9606 GN=PACSIN2 PE=1 SV=2	PACSIN2	2151.4	2742.2	2623.8	2660.2	2188.6	2656.7	2672.3	2473.9	2715.3	2478.2
Protein phosphatase 1 regulatory subunit 12A OS=Homo sapiens OX=9606 GN=PPP1R12A PE=1 SV=1	PPP1R12A	561.4	726.1	710.8	796.3	608.7	814.8	713.1	705.6	782.6	704.2
Transcriptional repressor p66-alpha OS=Homo sapiens OX=9606 GN=GATAD2A PE=1 SV=1	GATAD2A	289.2	399	425	368.3	321.3	357.1	342.4	355.2	383.9	427.8
Zinc finger MIZ domain-containing protein 2 OS=Homo sapiens OX=9606 GN=ZMIZ2 PE=1 SV=2	ZMIZ2	325.1	457.8	338.7	486	338.2	418.6	398.5	440.6	366.9	381.8
Ubiquitin-40S ribosomal protein S27a OS=Homo sapiens OX=9606 GN=RPS27A PE=1 SV=2	RPS27A	20212.3	26750.4	24114.5	30819.2	24357	24200.5	27639.2	25289.9	29081.4	27624
Cytosolic iron-sulfur assembly component 2A OS=Homo sapiens OX=9606 GN=CIAO2A PE=1 SV=1	CIAO2A	36.4	35.6	37	40.1	44.7	40.9	41.1	38.8	42.3	45.9
26S proteasome non-ATPase regulatory subunit 4 OS=Homo sapiens OX=9606 GN=PSMD4 PE=1 SV=1	PSMD4	3579	4837.5	4690.6	4345.7	3420.2	4415.6	3968.7	4153	4482	4223.4
Malonyl-CoA-acyl carrier protein transacylase, mitochondrial OS=Homo sapiens OX=9606 GN=MCAT PE=1 SV=2	MCAT	309.9	482.4	369.8	446.5	451.7	382	473.3	487.6	443.6	448.4
Mothers against decapentaplegic homolog OS=Homo sapiens OX=9606 GN=SMAD4 PE=1 SV=1	SMAD4	91.7	127.4	120.7	144.6	116.3	121.7	142.1	126.5	113.9	111.9
Adenylosuccinate lyase OS=Homo sapiens OX=9606 GN=ADSL PE=1 SV=1	ADSL	645.5	801.5	715.7	841.5	708.9	796	853.8	810.8	789.6	786.7
Cofilin-2 OS=Homo sapiens OX=9606 GN=CFL2 PE=1 SV=1	CFL2	840	989.4	985.5	982.8	777.2	1036	986.1	975	1004.2	1035.6
Complex I intermediate-associated protein 30, mitochondrial OS=Homo sapiens OX=9606 GN=NDUFAF1 PE=1 SV=2	NDUFAF1	100.6	108.1	131.6	114.7	117.9	124.1	129.9	121.2	141.7	112.1
Ubiquitin-conjugating enzyme E2 Q1 OS=Homo sapiens OX=9606 GN=UBE2Q1 PE=1 SV=1	UBE2Q1	117.1	134.9	120.5	154.1	114.9	138.5	144.7	130	137.2	129.6
Translation initiation factor eIF-2B subunit gamma OS=Homo sapiens OX=9606 GN=EIF2B3 PE=1 SV=1	EIF2B3	976.3	1181	1083.4	1253.8	984	1228.8	1200.6	1134.7	1170.3	1106.3
Acyl-CoA-binding protein OS=Homo sapiens OX=9606 GN=DBI PE=1 SV=1	DBI	1631.3	2023.4	2021.9	1854.4	1430	2011.6	1777	1897.5	2107.3	2005.6
CCR4-NOT transcription complex subunit 1 OS=Homo sapiens OX=9606 GN=CNOT1 PE=1 SV=2	CNOT1	1103.8	1393.1	1239.3	1476.4	1231.6	1361.4	1535.6	1391.6	1395	1301.2
NEDD8 (Fragment) OS=Homo sapiens OX=9606 GN=NEDD8-MDP1 PE=3 SV=1	NEDD8-MDP1	486.1	628.5	532.4	635.1	463.5	599.4	558.1	601.7	501	627.7
Calcium homeostasis endoplasmic reticulum protein OS=Homo sapiens OX=9606 GN=CHERP PE=1 SV=3	CHERP	2252.3	2852.5	2821.4	2999.3	2445.2	2932.1	2800	2768	2944.5	2758.9
Melanoma-associated antigen D1 OS=Homo sapiens OX=9606 GN=MAGED1 PE=1 SV=3	MAGED1	39.8	42.1	40.6	44.5	40.4	38.9	40.6	42.5	47.7	46.2
Myeloid-derived growth factor OS=Homo sapiens OX=9606 GN=MYDGF PE=1 SV=1	MYDGF	134.3	157.8	170	174.4	158	168.2	165	155.8	171	163.3
28S ribosomal protein S9, mitochondrial OS=Homo sapiens OX=9606 GN=MRPS9 PE=1 SV=2	MRPS9	155.1	262	181.7	246.8	287	178.8	295.5	309.3	242	262.5
Serine-threonine kinase receptor-associated protein OS=Homo sapiens OX=9606 GN=STRAP PE=1 SV=1	STRAP	10588.6	13074.9	12306.5	13223.3	9912.2	13413.9	12799.5	12189.3	12966.2	11775.5
Nucleolar protein 56 OS=Homo sapiens OX=9606 GN=NOP56 PE=1 SV=4	NOP56	1233.2	1948.5	1519.2	1955.6	2246.9	1398.2	2389.8	2464.1	1918.6	2215.3
Sialic acid synthase OS=Homo sapiens OX=9606 GN=NANS PE=1 SV=2	NANS	1814.8	2212.1	2055	2238.8	1747.9	2194.4	2263.4	2131.6	2195.2	2037
Translin OS=Homo sapiens OX=9606 GN=TSN PE=1 SV=1	TSN	3078.1	4173.5	3453.1	4276.8	3635.1	3792.7	4531	4313.8	4054.3	4068.1
Protein SREK1IP1 OS=Homo sapiens OX=9606 GN=SREK1IP1 PE=1 SV=1	SREK1IP1	61.2	73.8	53.3	69.9	66.1	56.9	96.7	83.1	67.7	74.5
SUMO-activating enzyme subunit 2 OS=Homo sapiens OX=9606 GN=UBA2 PE=1 SV=2	UBA2	3158.4	3883.5	3568.6	4219.3	3315.6	3880.6	4243.5	3903.9	4103.8	3736.6
Protein ABHD11 OS=Homo sapiens OX=9606 GN=ABHD11 PE=1 SV=1	ABHD11	219.7	339.7	330.4	333.2	318.8	297.4	337.5	345.3	334.3	345.1
Peroxiredoxin-4 OS=Homo sapiens OX=9606 GN=PRDX4 PE=1 SV=1	PRDX4	5882.7	7393.8	7294	8362.6	6580.4	8172.3	7446.7	7424.8	8149.4	7580.5
F-actin-capping protein subunit alpha-1 OS=Homo sapiens OX=9606 GN=CAPZA1 PE=1 SV=3	CAPZA1	3186.2	4004.8	3713.7	4137.2	3096.9	4058.7	3896.8	3839.6	4052	3848.4
Non-specific lipid-transfer protein OS=Homo sapiens OX=9606 GN=SCP2 PE=1 SV=2	SCP2	1350	1917.7	2278.2	1439.4	1304.6	1661.1	1436.7	1586.8	1845.6	1755
Transportin-3 OS=Homo sapiens OX=9606 GN=TNPO3 PE=1 SV=1	TNPO3	679.1	889.1	753.2	969.6	735.9	835.4	882.8	974.9	865.2	921.6
Pre-rRNA-processing protein TSR1 homolog OS=Homo sapiens OX=9606 GN=TSR1 PE=1 SV=1	TSR1	437	796.3	454.9	795.8	650.8	549.1	802.3	813	616.1	721.6
Zinc finger protein 582 OS=Homo sapiens OX=9606 GN=ZNF582 PE=4 SV=1	ZNF582	98	146.1	109.4	137.2	133.5	117.3	148.1	129.6	134.4	135
Synaptogyrin-2 OS=Homo sapiens OX=9606 GN=SYNGR2 PE=1 SV=1	SYNGR2	109.1	150.3	152	136.7	129.1	134.3	152.2	131.9	134.2	123.6
Protein PRRC1 OS=Homo sapiens OX=9606 GN=PRRC1 PE=1 SV=1	PRRC1	895.7	1083.6	992.2	1133.4	884	1147.2	1100.9	1012.7	1080.4	995.5
Crooked neck-like protein 1 OS=Homo sapiens OX=9606 GN=CRNKL1 PE=1 SV=4	CRNKL1	30.1	43.7	35	44.8	42.2	32.1	49.9	41.9	43.9	44.6
Histone deacetylase 1 OS=Homo sapiens OX=9606 GN=HDAC1 PE=1 SV=1	HDAC1	1376	1968.5	1638.2	2047.2	1756.8	1740.7	1983.5	1890	1803.4	1678.1
Ubiquitin-conjugating enzyme E2 R1 OS=Homo sapiens OX=9606 GN=CDC34 PE=1 SV=2	CDC34	267.9	338.2	344.2	324.8	256.1	329.2	331.1	302.1	348.5	328.7
BTB/POZ domain-containing protein KCTD5 OS=Homo sapiens OX=9606 GN=KCTD5 PE=1 SV=1	KCTD5	69.6	90.2	91.3	80.2	77.9	92.7	87.3	76.7	92.4	87.6
Ran GTPase-activating protein 1 OS=Homo sapiens OX=9606 GN=RANGAP1 PE=1 SV=1	RANGAP1	9665.8	11339	11290.4	12087.4	9821.6	12530.5	12184.5	11345.2	11817.4	10765.8
Tubulin beta-2B chain OS=Homo sapiens OX=9606 GN=TUBB2B PE=1 SV=1	TUBB2B	943.9	1025.7	1105.9	960.3	839.4	952.9	1031.4	886.8	1131.1	950
Sperm-associated antigen 5 OS=Homo sapiens OX=9606 GN=SPAG5 PE=1 SV=2	SPAG5	242.1	302	253	330.7	234	307.7	280	263.9	273.8	291.3
Spliceosome-associated protein CWC27 homolog OS=Homo sapiens OX=9606 GN=CWC27 PE=1 SV=1	CWC27	432.9	565.2	540.1	592.4	453.2	532.1	522.1	544.4	579.4	555.7
Transcription initiation factor IIA subunit 1 OS=Homo sapiens OX=9606 GN=GTF2A1 PE=1 SV=1	GTF2A1	22.3	26.4	27.9	26.8	19.1	31.9	26.5	26.2	25	21.5
Transcription initiation factor IIA subunit 2 OS=Homo sapiens OX=9606 GN=GTF2A2 PE=1 SV=1	GTF2A2	107.6	125.9	131.7	133.9	107	124.4	141	122.1	130.8	121.4
Eukaryotic translation initiation factor 3 subunit A OS=Homo sapiens OX=9606 GN=EIF3A PE=1 SV=1	EIF3A	12046.8	16820.6	13705.5	16966.6	13979.4	14775.3	16930.8	16383.2	15381	15048.1
ER membrane protein complex subunit 2 OS=Homo sapiens OX=9606 GN=EMC2 PE=1 SV=1	EMC2	126.1	178.1	130.2	184.3	184.2	146.5	201.7	185.4	180	153.1
Glomulin OS=Homo sapiens OX=9606 GN=GLMN PE=1 SV=2	GLMN	12.6	16.7	14.4	13.1	14.1	13.2	16.3	16.6	12.8	16.6
N-alpha-acetyltransferase 50 OS=Homo sapiens OX=9606 GN=NAA50 PE=1 SV=1	NAA50	1770.1	2370.2	1961.4	2479	2007.7	2172	2653.9	2450.1	2320.7	2179.6
Activator of basal transcription 1 OS=Homo sapiens OX=9606 GN=ABT1 PE=1 SV=1	ABT1	15.5	13.4	14.2	17.1	18.3	13	17.3	17	16.7	16.2
Opioid growth factor receptor OS=Homo sapiens OX=9606 GN=OGFR PE=1 SV=3	OGFR	374.8	479.6	422.6	494	412.9	488.4	480.6	467.9	482.7	463.3
Proteasome subunit alpha type-1 OS=Homo sapiens OX=9606 GN=PSMA1 PE=1 SV=1	PSMA1	6385.4	8083.5	7404.8	8317.1	6298.9	8116.5	7624.8	7717.3	7548.8	7128.4
RuvB-like 1 OS=Homo sapiens OX=9606 GN=RUVBL1 PE=1 SV=1	RUVBL1	7238.9	9070.6	8505	9896.8	7650.5	9533	9025.6	8852.2	8965.1	8674.2
General transcription factor 3C polypeptide 1 OS=Homo sapiens OX=9606 GN=GTF3C1 PE=1 SV=4	GTF3C1	355.3	560	395.4	568.1	534.6	435.3	575.5	593.5	508.5	512.7
Prolyl endopeptidase-like OS=Homo sapiens OX=9606 GN=PREPL PE=1 SV=1	PREPL	470.3	605.1	556.8	637.9	501.3	589.6	648.7	579.6	588.6	550
6-phosphogluconolactonase OS=Homo sapiens OX=9606 GN=PGLS PE=1 SV=2	PGLS	1766	2007.4	1968.8	2134.5	1597.5	2145.1	2097.6	1987.5	2082.1	1978.9
Signal peptidase complex subunit 1 OS=Homo sapiens OX=9606 GN=SPCS1 PE=1 SV=5	SPCS1	155.6	192.2	195.1	166.6	205.6	131.6	212.4	170.7	203.4	230.6
WD repeat-containing protein 3 OS=Homo sapiens OX=9606 GN=WDR3 PE=1 SV=1	WDR3	465.8	762.8	560.1	763.7	783.6	570.8	808.3	822.7	690.6	733
Neuro-oncological ventral antigen 2 OS=Homo sapiens OX=9606 GN=NOVA2 PE=4 SV=1	NOVA2	240.2	357.3	324.3	358.2	355.6	295.5	337.4	337.7	355.1	319.4
Malate dehydrogenase, mitochondrial OS=Homo sapiens OX=9606 GN=MDH2 PE=1 SV=3	MDH2	14298.4	17484.6	18326.9	16001.1	14672	18900.6	16952.9	17123.8	17560.7	16444.4
Serine/threonine-protein kinase N1 OS=Homo sapiens OX=9606 GN=PKN1 PE=1 SV=2	PKN1	37.1	50.3	43.1	45.4	34.9	42.2	51.6	41.9	44.3	45.1
Pre-mRNA 3'-end-processing factor FIP1 OS=Homo sapiens OX=9606 GN=FIP1L1 PE=1 SV=1	FIP1L1	107.6	140.7	161.3	155.8	142.2	143.6	134	156.6	165.3	159.2
ERO1-like protein alpha OS=Homo sapiens OX=9606 GN=ERO1A PE=1 SV=2	ERO1A	474.7	597.3	597.1	678.1	592.2	628.8	642.5	621.3	607.3	599.1
Thioredoxin domain-containing protein 9 OS=Homo sapiens OX=9606 GN=TXNDC9 PE=1 SV=2	TXNDC9	129.1	168.1	198.2	160.8	132.3	158.1	152.3	155.6	166.4	176.1
L-lactate dehydrogenase B chain OS=Homo sapiens OX=9606 GN=LDHB PE=1 SV=2	LDHB	20939.5	24653.9	22733.1	26752.9	20577.6	24651.2	24715.8	23719	22682.5	23412.4
DnaJ homolog subfamily B member 1 OS=Homo sapiens OX=9606 GN=DNAJB1 PE=1 SV=4	DNAJB1	1431.2	1984.2	2083.2	1614.1	1349.5	1751.2	1711	1717.2	1918.6	1872.3
Transducin beta-like protein 3 OS=Homo sapiens OX=9606 GN=TBL3 PE=1 SV=2	TBL3	1321.8	1684.7	1583.8	1876.7	1801.1	1618.1	1879.7	1792.4	1708.7	1649.2
28S ribosomal protein S6, mitochondrial OS=Homo sapiens OX=9606 GN=MRPS6 PE=1 SV=3	MRPS6	392.9	561.3	740.1	438.3	453.5	480.8	509.9	541.6	674.6	664.9
Ubiquitin-like-conjugating enzyme ATG3 OS=Homo sapiens OX=9606 GN=ATG3 PE=1 SV=1	ATG3	562.9	694.2	653.5	734.6	570.7	668.2	698.4	637.6	715.7	665.4
Mitochondrial import receptor subunit TOM22 homolog OS=Homo sapiens OX=9606 GN=TOMM22 PE=1 SV=3	TOMM22	608	858.1	786.2	722.9	718.8	756.4	851.4	760.5	856.3	805.4
MICOS complex subunit MIC60 OS=Homo sapiens OX=9606 GN=IMMT PE=1 SV=1	IMMT	330.1	524.3	459	426.2	410.4	476.3	451.6	457	439.2	459.4
3-hydroxyisobutyryl-CoA hydrolase, mitochondrial OS=Homo sapiens OX=9606 GN=HIBCH PE=1 SV=2	HIBCH	422.9	486.2	513.1	534	538.8	517	598.5	515.3	626.7	533.3
Retinol dehydrogenase 13 OS=Homo sapiens OX=9606 GN=RDH13 PE=1 SV=2	RDH13	29.2	39.3	39.5	35.7	31.6	35.7	32.7	35.7	36.5	35.7
Protein farnesyltransferase subunit beta OS=Homo sapiens OX=9606 GN=FNTB PE=1 SV=1	FNTB	142.1	177.7	165.6	197.2	159.3	188.4	177.8	182.2	189.3	169.6
Laminin subunit gamma-1 OS=Homo sapiens OX=9606 GN=LAMC1 PE=1 SV=3	LAMC1	344.9	414.2	400	459.4	382.6	456.4	414.5	430.1	414.7	417.4
Protein Churchill OS=Homo sapiens OX=9606 GN=CHURC1 PE=1 SV=2	CHURC1	98.5	121.7	131.9	140.7	103.4	134.7	119	137.1	135.7	142.3
Putative tRNA (cytidine(32)/guanosine(34)-2'-O)-methyltransferase OS=Homo sapiens OX=9606 GN=FTSJ1 PE=1 SV=2	FTSJ1	236.3	284	269	304.5	265.3	271.4	291.7	288.1	294	296.7
Rho guanine nucleotide exchange factor 7 OS=Homo sapiens OX=9606 GN=ARHGEF7 PE=1 SV=1	ARHGEF7	223.4	218.9	242.8	239.7	185.9	203.6	222.5	209	233.4	220.9
Isocitrate dehydrogenase [NADP], mitochondrial OS=Homo sapiens OX=9606 GN=IDH2 PE=1 SV=2	IDH2	489.5	870.9	626.5	710.3	765.5	598.8	802.8	843.8	743	717.6
Nitric oxide synthase-interacting protein OS=Homo sapiens OX=9606 GN=NOSIP PE=1 SV=1	NOSIP	227.7	297.1	311.6	249.2	217.7	278.5	250.8	284.3	326.8	328.6
Eukaryotic translation initiation factor 2 subunit 1 OS=Homo sapiens OX=9606 GN=EIF2S1 PE=1 SV=3	EIF2S1	4419.4	5457.2	4935.1	5794.6	4654.1	5399.2	5583.2	5349.8	5302.7	4836.1
BRCA1-A complex subunit BRE (Fragment) OS=Homo sapiens OX=9606 GN=BABAM2 PE=1 SV=1	BABAM2	72.1	89.9	83.9	104.8	87.9	92.2	89.9	102	96.6	97.6
Jupiter microtubule associated homolog 2 OS=Homo sapiens OX=9606 GN=JPT2 PE=1 SV=1	JPT2	825.8	956.5	923.6	1026.1	803.8	1003.8	980.7	928.5	998.5	989.4
Nucleoporin p58/p45 OS=Homo sapiens OX=9606 GN=NUP58 PE=1 SV=1	NUP58	345.6	467.8	414.7	473.7	414.1	483.2	448.5	435.8	460.9	441.7
Eukaryotic peptide chain release factor GTP-binding subunit ERF3A OS=Homo sapiens OX=9606 GN=GSPT1 PE=1 SV=1	GSPT1	4754.4	5740	5402.6	6128.4	4657.5	5808.5	5932.2	5460.5	5773.7	5211.6
COP9 signalosome complex subunit 8 OS=Homo sapiens OX=9606 GN=COPS8 PE=1 SV=1	COPS8	1264.4	1495.5	1533.9	1347.1	1197.5	1508.3	1495.9	1391.9	1611.3	1519
26S proteasome regulatory subunit 6B OS=Homo sapiens OX=9606 GN=PSMC4 PE=1 SV=2	PSMC4	9998.1	11630.1	11625.2	12006.9	9508.9	11858.7	11626.1	10769.8	11790.9	10977.8
Polyadenylate-binding protein 2 OS=Homo sapiens OX=9606 GN=PABPN1 PE=1 SV=3	PABPN1	815.1	932	1002.7	1071.1	925	996.2	982.2	987.9	983.5	1076.4
60S ribosomal protein L36a-like OS=Homo sapiens OX=9606 GN=RPL36AL PE=1 SV=3	RPL36AL	28.6	52.3	40	47.3	49.4	42.8	52.3	46	43.5	41.1
ATP-dependent RNA helicase DDX3X OS=Homo sapiens OX=9606 GN=DDX3X PE=1 SV=3	DDX3X	6111.5	9286.6	6997.5	8533.1	8301.4	7010.2	9537.8	8914.1	8301.8	8159.9
Glutathione reductase, mitochondrial OS=Homo sapiens OX=9606 GN=GSR PE=1 SV=2	GSR	2466.2	2985.3	2692	3193.6	2393.9	3061.9	2805.9	2795.5	2801.4	2730.8
HIV Tat-specific factor 1 OS=Homo sapiens OX=9606 GN=HTATSF1 PE=1 SV=1	HTATSF1	2415	3202.1	2830.4	3247.9	2426	3232	2980.5	2937.8	3149.9	2964.9
Aldo-keto reductase family 1 member A1 OS=Homo sapiens OX=9606 GN=AKR1A1 PE=1 SV=3	AKR1A1	433.8	548.3	544.7	609.5	424.5	529.8	568.2	515.2	592.2	489
Peptidyl-prolyl cis-trans isomerase FKBP8 OS=Homo sapiens OX=9606 GN=FKBP8 PE=1 SV=2	FKBP8	42	49.2	59.7	44	55	44.3	62.3	49.7	67.5	61.5
Protein RCC2 OS=Homo sapiens OX=9606 GN=RCC2 PE=1 SV=2	RCC2	5462.4	6968.9	5886	7161.9	5979.6	6269	7589.1	6974.9	6961.8	6454.4
Complement component 1 Q subcomponent-binding protein, mitochondrial OS=Homo sapiens OX=9606 GN=C1QBP PE=1 SV=1	C1QBP	6632.2	8779.5	9011.7	8376.7	7626.6	9415.9	8771.2	8537.4	9823.7	8503.1
Polyadenylate-binding protein 1 OS=Homo sapiens OX=9606 GN=PABPC1 PE=1 SV=2	PABPC1	5418.9	7265	6673.7	6726.6	5587.5	6613.5	6665.6	6480.9	6590	6477.2
General transcription factor 3C polypeptide 5 OS=Homo sapiens OX=9606 GN=GTF3C5 PE=1 SV=1	GTF3C5	47.1	58.9	54	65.5	59.1	57.4	61	56	66.5	63.4
Parathymosin OS=Homo sapiens OX=9606 GN=PTMS PE=1 SV=2	PTMS	1759.1	2142.4	1934.1	2273.6	1721.4	2182.3	1990.5	2005.3	2059.7	2083.6
SRA stem-loop-interacting RNA-binding protein, mitochondrial OS=Homo sapiens OX=9606 GN=SLIRP PE=1 SV=1	SLIRP	24.9	43.6	46.9	40.5	39.4	40.4	39.1	43.9	43.8	44
Vacuolar protein-sorting-associated protein 25 OS=Homo sapiens OX=9606 GN=VPS25 PE=1 SV=1	VPS25	359.3	374.2	395.5	437.9	348.3	412.3	462.8	374	442.6	388.8
Eukaryotic translation initiation factor 4E type 2 OS=Homo sapiens OX=9606 GN=EIF4E2 PE=1 SV=1	EIF4E2	137	180.3	153.2	195.2	147.3	195.1	180.1	185.3	162.2	154.2
Mapk-regulated corepressor-interacting protein 1 OS=Homo sapiens OX=9606 GN=MCRIP1 PE=1 SV=1	MCRIP1	388.5	454.3	479.4	491.2	364.9	482.5	406.4	444.6	477.3	443.5
Polymerase delta-interacting protein 2 OS=Homo sapiens OX=9606 GN=POLDIP2 PE=1 SV=1	POLDIP2	710.5	957.9	910.9	984.1	969.5	838.2	970.8	957.4	956.3	916.5
pre-mRNA 3' end processing protein WDR33 OS=Homo sapiens OX=9606 GN=WDR33 PE=1 SV=2	WDR33	18.6	30.8	23.6	35.6	33.6	22.7	34.4	31.9	27.7	34
Bifunctional 3'-phosphoadenosine 5'-phosphosulfate synthase 1 OS=Homo sapiens OX=9606 GN=PAPSS1 PE=1 SV=2	PAPSS1	400.2	650.4	430.7	645.8	558.5	492.8	649.7	636	555.1	576.2
Nuclear pore complex protein Nup155 OS=Homo sapiens OX=9606 GN=NUP155 PE=1 SV=1	NUP155	3646.9	4486.1	4343	5062.3	4259.5	4646.8	4625.3	4504.6	4598.1	4383.6
Baculoviral IAP repeat-containing protein 6 OS=Homo sapiens OX=9606 GN=BIRC6 PE=1 SV=2	BIRC6	222.2	285	243.3	285.5	246	256.5	284.4	270	278	248.1
Eukaryotic translation initiation factor 3 subunit H OS=Homo sapiens OX=9606 GN=EIF3H PE=1 SV=1	EIF3H	3335.6	4532.6	3803.6	4660.1	3387.2	4363.7	4043.7	4079.8	3857.2	3776.9
Neurochondrin OS=Homo sapiens OX=9606 GN=NCDN PE=1 SV=1	NCDN	753.2	972.5	869.9	973.8	809	878.8	970.9	855.5	972.4	928.8
Guanine nucleotide exchange factor MSS4 OS=Homo sapiens OX=9606 GN=RABIF PE=1 SV=2	RABIF	36.7	47.2	59.8	42	33.7	43.6	47.1	53.5	55.7	64.6
Peroxiredoxin-2 OS=Homo sapiens OX=9606 GN=PRDX2 PE=1 SV=5	PRDX2	5489.3	6313.2	6342.9	6346	5065.9	6395	6298.2	5902.4	6543.6	6174.5
PAX3- and PAX7-binding protein 1 OS=Homo sapiens OX=9606 GN=PAXBP1 PE=1 SV=2	PAXBP1	42.8	53.2	48.3	69.6	54	52.2	62.4	60.4	53.1	55.5
DnaJ homolog subfamily A member 2 OS=Homo sapiens OX=9606 GN=DNAJA2 PE=1 SV=1	DNAJA2	3191.5	4985.2	4101	4508.2	3842.5	3891.8	4563.7	4363.1	4593.5	4128.7
DNA primase OS=Homo sapiens OX=9606 GN=PRIM1 PE=1 SV=1	PRIM1	131	154.3	143.9	196.7	172.2	149.5	193.5	199	190.8	192.1
Transcription initiation factor TFIID subunit 7 OS=Homo sapiens OX=9606 GN=TAF7 PE=1 SV=1	TAF7	61.2	81.2	69.8	96.4	73.4	75.8	81	84.5	78.3	76.6
39S ribosomal protein L55, mitochondrial OS=Homo sapiens OX=9606 GN=MRPL55 PE=1 SV=2	MRPL55	386.6	625.2	605.4	525.2	506.2	471.4	583.1	619.5	596.7	744.4
DNA-directed RNA polymerase II subunit RPB4 OS=Homo sapiens OX=9606 GN=POLR2D PE=1 SV=1	POLR2D	971.4	1280.4	1245.6	1232.9	1002.7	1183.3	1103.6	1128.7	1218.5	1163.5
Triosephosphate isomerase OS=Homo sapiens OX=9606 GN=TPI1 PE=1 SV=4	TPI1	9076.9	12987.8	16119	9121.6	7672.9	11053.3	8943	11196.5	14087.8	15007.8
Adenosine kinase OS=Homo sapiens OX=9606 GN=ADK PE=1 SV=2	ADK	2805	3629.9	3213.8	3712.6	2837.5	3518.3	3540.4	3401.1	3580.3	3163.1
DNA/RNA-binding protein KIN17 OS=Homo sapiens OX=9606 GN=KIN PE=1 SV=2	KIN	103.9	128.1	130.1	138.7	136.9	94.5	140.9	148.7	134.5	105.3
DNA-directed RNA polymerase III subunit RPC6 OS=Homo sapiens OX=9606 GN=POLR3F PE=1 SV=1	POLR3F	349.3	448.4	426	497.3	372.2	425.4	472.1	400.5	423.3	419.1
ATP-dependent RNA helicase DDX51 OS=Homo sapiens OX=9606 GN=DDX51 PE=1 SV=3	DDX51	48.2	64.9	46.3	65.5	57.6	51	71.2	79.7	61.2	64.2
Actin, alpha skeletal muscle OS=Homo sapiens OX=9606 GN=ACTA1 PE=1 SV=1	ACTA1	9582.4	11640.3	11714.4	12887	10493.3	13335.8	12354.4	12118.4	12149.4	11362.8
Uroporphyrinogen decarboxylase OS=Homo sapiens OX=9606 GN=UROD PE=1 SV=2	UROD	303.3	348	341.3	416.1	346	369.5	396.7	387.8	386.2	378.9
Actin-depolymerizing factor OS=Homo sapiens OX=9606 GN=DSTN PE=1 SV=1	DSTN	1183.5	1561.5	1457.7	1439.4	1115.7	1441.6	1451.7	1367.8	1422.3	1308.9
Prostaglandin reductase 1 OS=Homo sapiens OX=9606 GN=PTGR1 PE=1 SV=2	PTGR1	59.2	93.7	66.4	84.3	62.1	72.1	84.6	87.1	68.3	75.9
5'-AMP-activated protein kinase catalytic subunit alpha-1 OS=Homo sapiens OX=9606 GN=PRKAA1 PE=1 SV=4	PRKAA1	362.6	533.1	364.5	473.7	410	430	531.5	515.4	470	455.2
GRB10-interacting GYF protein 2 OS=Homo sapiens OX=9606 GN=GIGYF2 PE=1 SV=1	GIGYF2	1440.7	1625.1	1598.5	1824.9	1416.6	1754	1689.8	1570	1683.8	1635.8
G-rich sequence factor 1 OS=Homo sapiens OX=9606 GN=GRSF1 PE=1 SV=2	GRSF1	482.9	733.3	739.2	554	518.2	657.8	628.3	614.3	750.7	577.7
Hydroxymethylglutaryl-CoA synthase, cytoplasmic OS=Homo sapiens OX=9606 GN=HMGCS1 PE=1 SV=2	HMGCS1	2934.8	3866.3	3189.3	3984.2	2822.5	3598.5	3727.6	3337.5	3472.8	3144.5
Cytospin-B OS=Homo sapiens OX=9606 GN=SPECC1 PE=1 SV=1	SPECC1	77.8	176.6	100.6	171.4	135.4	99.9	172.7	208.4	108.3	150.7
39S ribosomal protein L11, mitochondrial OS=Homo sapiens OX=9606 GN=MRPL11 PE=1 SV=1	MRPL11	1432.4	1798.6	1965.4	1730.2	1623.5	1777.9	1790.5	1626.6	1900.3	1755.8
Ran-binding protein 3 OS=Homo sapiens OX=9606 GN=RANBP3 PE=1 SV=1	RANBP3	83.2	90.8	82.3	104.4	86.7	101.2	91.2	91.7	80.2	90.3
Midasin OS=Homo sapiens OX=9606 GN=MDN1 PE=1 SV=2	MDN1	997.3	1292.3	1204.3	1388.9	1363.4	1190.5	1472.5	1369.3	1345.2	1312.1
Activating signal cointegrator 1 complex subunit 1 OS=Homo sapiens OX=9606 GN=ASCC1 PE=1 SV=1	ASCC1	100.5	103.2	108.4	125.7	90.8	116.3	122.4	119.4	118.2	101.1
Bifunctional coenzyme A synthase OS=Homo sapiens OX=9606 GN=COASY PE=1 SV=4	COASY	58.5	75.9	62.4	80.5	61.2	63	78.8	73.7	78	60.8
Lysosome membrane protein 2 OS=Homo sapiens OX=9606 GN=SCARB2 PE=1 SV=1	SCARB2	96.2	126.3	119.5	117.1	105	131	125.8	123.5	140.5	107.4
60S ribosomal protein L10 OS=Homo sapiens OX=9606 GN=RPL10 PE=1 SV=4	RPL10	168	272.2	193.8	269.6	289.2	204.4	355.4	345.8	247.9	286.9
Charged multivesicular body protein 3 OS=Homo sapiens OX=9606 GN=CHMP3 PE=1 SV=3	CHMP3	19.5	27.9	24.5	25.9	22.8	23.7	27.8	25.4	22.1	23.8
Arginine--tRNA ligase, cytoplasmic OS=Homo sapiens OX=9606 GN=RARS1 PE=1 SV=2	RARS1	4564.5	5872	5324.5	6183.1	5185.2	5547.4	6221	5759.4	5883.2	5383
NSFL1 cofactor p47 OS=Homo sapiens OX=9606 GN=NSFL1C PE=1 SV=2	NSFL1C	1338	1561.4	1609.2	1558.5	1186.2	1603.1	1554.1	1561.3	1697.8	1566.7
SHC SH2 domain-binding protein 1 OS=Homo sapiens OX=9606 GN=SHCBP1 PE=1 SV=3	SHCBP1	7.4	13.3	8.9	12.2	10.5	10.6	10.6	16.3	11.8	8.4
Small nuclear ribonucleoprotein F OS=Homo sapiens OX=9606 GN=SNRPF PE=1 SV=1	SNRPF	171.4	229.2	211	217.2	189.9	235.1	216.4	217.8	223.5	202.9
Nucleolin OS=Homo sapiens OX=9606 GN=NCL PE=1 SV=3	NCL	31517.1	37147.1	37843	40256.6	33180.8	38205.8	38120.9	36061.8	38973.1	38093.6
28S ribosomal protein S15, mitochondrial OS=Homo sapiens OX=9606 GN=MRPS15 PE=1 SV=1	MRPS15	99.6	177.1	118.7	166.8	165	121	178.7	195.4	140.1	142.1
Isochorismatase domain-containing protein 2 (Fragment) OS=Homo sapiens OX=9606 GN=ISOC2 PE=1 SV=8	ISOC2	268.7	276.4	344.8	326.9	279.8	329.5	326	312	316.2	306.8
FAS-associated factor 2 OS=Homo sapiens OX=9606 GN=FAF2 PE=1 SV=2	FAF2	211.6	294.7	286.8	236.1	286.4	250.9	329.8	295.9	297.9	313.5
40-kDa huntingtin-associated protein OS=Homo sapiens OX=9606 GN=F8A1 PE=1 SV=2	F8A1	65.9	83.1	80.7	95.4	72	79.9	86.3	83.8	92.2	78.6
Eukaryotic initiation factor 4A-I OS=Homo sapiens OX=9606 GN=EIF4A1 PE=1 SV=1	EIF4A1	11624.1	15963.3	13047.1	16242.3	12362.9	14802.6	15208.4	14725.4	14089.2	13732.8
Cytokine receptor-like factor 3 OS=Homo sapiens OX=9606 GN=CRLF3 PE=1 SV=2	CRLF3	179.8	220.7	208.4	238.7	180.6	225.9	224.2	198.8	221.6	200.7
Cytochrome c oxidase subunit 6B1 OS=Homo sapiens OX=9606 GN=COX6B1 PE=1 SV=2	COX6B1	681.1	1103.9	1352.9	978.5	807.7	826.9	706.4	769.6	1038.2	992.5
Peptidyl-prolyl cis-trans isomerase H OS=Homo sapiens OX=9606 GN=PPIH PE=1 SV=1	PPIH	1702.6	2386.9	2523.7	1821.5	1518.8	2067.4	1937.9	2061.1	2167.5	2170.4
PEST proteolytic signal-containing nuclear protein OS=Homo sapiens OX=9606 GN=PCNP PE=1 SV=2	PCNP	1679.4	1968.7	1842.1	2099	1599	2040.1	1977	1854.3	1949.3	1861.7
BCL-6 corepressor OS=Homo sapiens OX=9606 GN=BCOR PE=1 SV=1	BCOR	73.4	83.5	88.9	85.9	82.7	87.5	93.6	89.6	114.1	91.9
Ubiquitin carboxyl-terminal hydrolase 8 OS=Homo sapiens OX=9606 GN=USP8 PE=1 SV=1	USP8	78.6	128.3	85.6	134	106.8	106.1	121.3	130.7	129.4	108.7
Cleavage and polyadenylation specificity factor subunit 3 OS=Homo sapiens OX=9606 GN=CPSF3 PE=1 SV=1	CPSF3	293.1	359.4	339.5	417.6	329.2	373.3	356.8	350.8	344.7	332.6
Isocitrate dehydrogenase [NAD] subunit beta, mitochondrial OS=Homo sapiens OX=9606 GN=IDH3B PE=1 SV=2	IDH3B	980.2	1714.3	1334.7	1483.6	1397.9	1331.6	1611	1575.5	1432.5	1346.3
Protein AAR2 homolog OS=Homo sapiens OX=9606 GN=AAR2 PE=1 SV=2	AAR2	97.4	129.7	118.7	136.5	122.3	118.2	148.7	123.4	126.1	115.5
Coiled-coil domain-containing protein 6 OS=Homo sapiens OX=9606 GN=CCDC6 PE=1 SV=2	CCDC6	1183	1439	1435.4	1440.3	1238.4	1433.2	1429.1	1340.6	1510.8	1400.3
S-phase kinase-associated protein 1 OS=Homo sapiens OX=9606 GN=SKP1 PE=1 SV=1	SKP1	3271.2	4023.8	3826.5	4157.5	3232.3	3969.2	3994.4	3646.3	4066.6	3547.6
Uncharacterized protein OS=Homo sapiens OX=9606 PE=3 SV=1	3	27.7	36.1	30.8	39.4	31.1	36.8	35.2	37.1	33.7	34.5
Leucine-rich repeat protein SHOC-2 OS=Homo sapiens OX=9606 GN=SHOC2 PE=1 SV=2	SHOC2	57.9	74.6	64	71.8	60.1	72.7	74.1	68.4	67.9	63.4
T-complex protein 1 subunit epsilon OS=Homo sapiens OX=9606 GN=CCT5 PE=1 SV=1	CCT5	22988.1	27582.2	26610.3	29484.7	22997.4	29358.8	27399.9	26343.4	26353.2	26085.5
Telomerase-binding protein EST1A OS=Homo sapiens OX=9606 GN=SMG6 PE=1 SV=2	SMG6	22.9	37.1	31.7	39.2	31.9	27.2	38.1	38.5	28.6	35.4
Kinesin light chain OS=Homo sapiens OX=9606 GN=KLC1 PE=1 SV=1	KLC1	2722.2	3266.8	3077.6	3471	2664.2	3421.4	3425	3101.7	3341.9	2958
Serine/threonine-protein phosphatase 2A 65 kDa regulatory subunit A beta isoform OS=Homo sapiens OX=9606 GN=PPP2R1B PE=1 SV=3	PPP2R1B	1289.7	1521.5	1574	1674.7	1314.2	1672.2	1654.5	1481.4	1607.4	1458.2
Striatin OS=Homo sapiens OX=9606 GN=STRN PE=1 SV=4	STRN	216.8	249.4	255.8	257	219.4	263.1	271	240.7	244.1	256.6
PDZ and LIM domain protein 3 OS=Homo sapiens OX=9606 GN=PDLIM3 PE=1 SV=2	PDLIM3	158.4	199.2	203.4	182.7	163.1	187.4	197.7	185.9	227.2	194.2
Transcription elongation factor SPT6 OS=Homo sapiens OX=9606 GN=SUPT6H PE=1 SV=2	SUPT6H	2116.8	2639.4	2399.1	2918.3	2398.6	2580.7	2637.6	2471.2	2530.4	2331.8
Protein SMG9 (Fragment) OS=Homo sapiens OX=9606 GN=SMG9 PE=1 SV=1	SMG9	15.9	23.1	20.1	25	19.2	19.4	22.1	21.2	23.8	21.3
28S ribosomal protein S29, mitochondrial OS=Homo sapiens OX=9606 GN=DAP3 PE=1 SV=1	DAP3	540.3	650.2	633.2	666.6	677.7	649	723.2	741.9	643.6	742.4
Rab11 family-interacting protein 5 OS=Homo sapiens OX=9606 GN=RAB11FIP5 PE=1 SV=1	RAB11FIP5	111	129.4	137.3	151.6	124.9	121.6	129.4	141.5	145.3	148.2
Ras GTPase-activating-like protein IQGAP2 (Fragment) OS=Homo sapiens OX=9606 GN=IQGAP2 PE=1 SV=1	IQGAP2	107	173.2	144.4	179.3	142.3	145.4	169.9	170.5	160	158
Epimerase family protein SDR39U1 OS=Homo sapiens OX=9606 GN=SDR39U1 PE=1 SV=3	SDR39U1	18.4	16.5	23.8	22.5	24.7	18.7	26.1	24.5	31	23.9
Nodal modulator 1 OS=Homo sapiens OX=9606 GN=NOMO1 PE=1 SV=1	NOMO1	1581.9	2003.2	1998.2	2095.3	1807.8	2074.2	2061.6	1944.4	2022.2	1870.2
Phosphoglycerate kinase 1 OS=Homo sapiens OX=9606 GN=PGK1 PE=1 SV=3	PGK1	20385.3	21138	23050.9	23536.6	18550.4	24297.9	22720.1	21980.5	22694.9	21500.8
Protein LSM12 homolog OS=Homo sapiens OX=9606 GN=LSM12 PE=1 SV=2	LSM12	381.3	508.9	433.3	500.3	371.1	494.6	444.2	446.2	455	417.5
Haloacid dehalogenase-like hydrolase domain-containing protein 2 OS=Homo sapiens OX=9606 GN=HDHD2 PE=1 SV=1	HDHD2	155.4	185.1	167.2	199.1	157.1	195.9	183.6	173.9	159.4	162.4
Serine/arginine-rich splicing factor 4 OS=Homo sapiens OX=9606 GN=SRSF4 PE=1 SV=2	SRSF4	746.3	959.2	853.6	957.9	830.2	908	951.3	892.1	898.6	819.7
Cyclin-dependent kinase 2-associated protein 1 OS=Homo sapiens OX=9606 GN=CDK2AP1 PE=1 SV=1	CDK2AP1	23.1	35.6	40.7	28.4	19.9	28	22.2	23.6	28.3	35
T-complex protein 1 subunit beta OS=Homo sapiens OX=9606 GN=CCT2 PE=1 SV=4	CCT2	26422.4	31378.4	30979.1	33630	26740.6	33558.3	31651	30154.1	31587	29658.5
39S ribosomal protein L23, mitochondrial OS=Homo sapiens OX=9606 GN=MRPL23 PE=1 SV=1	MRPL23	109.1	183.6	145	144.8	160.8	129	173	180.5	161.4	178.2
Annexin A1 OS=Homo sapiens OX=9606 GN=ANXA1 PE=1 SV=2	ANXA1	1894.4	2243	2028.3	2303.3	1735.9	2328	2134.1	2087.9	2171.9	2058.2
Pre-mRNA-splicing factor RBM22 OS=Homo sapiens OX=9606 GN=RBM22 PE=1 SV=1	RBM22	546.9	633.9	751.8	650	576.9	645.1	716.5	639.5	778.5	639.8
RNA-binding protein 8A OS=Homo sapiens OX=9606 GN=RBM8A PE=1 SV=1	RBM8A	585.1	926.2	785.2	844.7	746.1	689.4	848.5	808.7	868.8	841.1
PIN2/TERF1-interacting telomerase inhibitor 1 OS=Homo sapiens OX=9606 GN=PINX1 PE=4 SV=1	PINX1	11	19.7	20.6	18.1	23.3	16.5	25.5	21.2	17.4	22.2
Branched-chain-amino-acid aminotransferase, cytosolic OS=Homo sapiens OX=9606 GN=BCAT1 PE=1 SV=3	BCAT1	324	481.6	344.4	440.7	320.3	420.5	397.9	368.7	370.7	354.9
Microtubule-associated protein 9 OS=Homo sapiens OX=9606 GN=MAP9 PE=1 SV=1	MAP9	114.9	156.4	131.5	149.3	135.4	116.2	166.5	135.2	148.3	143.6
Very-long-chain (3R)-3-hydroxyacyl-CoA dehydratase 3 OS=Homo sapiens OX=9606 GN=HACD3 PE=1 SV=2	HACD3	117.5	195.7	166	126.3	183.3	141	199.1	170.8	188.9	202.8
COP9 signalosome complex subunit 1 OS=Homo sapiens OX=9606 GN=GPS1 PE=1 SV=4	GPS1	835.2	1109.6	917.9	1169.1	928.2	1011.4	1094.9	1063.1	1001.3	1030.8
ATP-dependent 6-phosphofructokinase, platelet type OS=Homo sapiens OX=9606 GN=PFKP PE=1 SV=2	PFKP	1921.4	2633.4	2085.7	2722.4	2198.3	2323.7	2687.9	2572.1	2364.1	2365.5
Protein BRICK1 OS=Homo sapiens OX=9606 GN=BRK1 PE=1 SV=1	BRK1	60.4	72.1	70.8	59.5	51	63.2	71.4	61.8	66.5	64.6
Peptidyl-prolyl cis-trans isomerase FKBP1A OS=Homo sapiens OX=9606 GN=FKBP1A PE=1 SV=2	FKBP1A	66.8	101	113	68.6	58.7	80.8	65.2	83	102.3	117.4
Nucleolar transcription factor 1 OS=Homo sapiens OX=9606 GN=UBTF PE=1 SV=1	UBTF	413.4	631.8	511	597.6	589.1	512.8	625.5	666.8	534	635.5
Cyclin-dependent kinases regulatory subunit 2 OS=Homo sapiens OX=9606 GN=CKS2 PE=1 SV=1	CKS2	374.1	452.7	504.3	460.3	386.2	373.7	448.2	397.1	514.2	431.7
N-alpha-acetyltransferase 10 OS=Homo sapiens OX=9606 GN=NAA10 PE=1 SV=1	NAA10	3805.6	5013.3	4450.6	4916.8	3894.6	4552.6	5071.8	4474.7	4862.3	4307.2
60 kDa poly(U)-binding-splicing factor (Fragment) OS=Homo sapiens OX=9606 GN=PUF60 PE=1 SV=1	PUF60	5391.4	6440.5	6197.4	6995.9	5376.9	6573.1	6375	6022.1	6274.8	6074
Pumilio homolog 1 (Fragment) OS=Homo sapiens OX=9606 GN=PUM1 PE=1 SV=1	PUM1	621.2	780.2	714.8	793	683.7	744.3	841.6	734.2	820.3	729.6
Enhancer of rudimentary homolog OS=Homo sapiens OX=9606 GN=ERH PE=1 SV=1	ERH	3431.6	3356.2	4097.6	2918.9	3109.8	3575.6	3586.5	3346.2	3674.4	3438.1
ATP synthase subunit alpha, mitochondrial OS=Homo sapiens OX=9606 GN=ATP5F1A PE=1 SV=1	ATP5F1A	12772.4	17302.9	16750.1	17147.1	15035.5	17795.3	17113.4	17189.8	17995.4	16113.3
WD repeat-containing protein 18 OS=Homo sapiens OX=9606 GN=WDR18 PE=1 SV=2	WDR18	1145.5	1444.4	1329.5	1550.4	1333.2	1427.1	1428.8	1373.9	1391.1	1345.5
Glutamine-rich protein 1 OS=Homo sapiens OX=9606 GN=QRICH1 PE=1 SV=1	QRICH1	458.1	615.1	529.2	637.9	492.4	614.8	607.6	575.8	613.6	524.2
26S proteasome non-ATPase regulatory subunit 11 OS=Homo sapiens OX=9606 GN=PSMD11 PE=1 SV=3	PSMD11	6168.7	7934.1	7086.1	8291.1	6678.7	7448.5	7965.9	7463.5	7621.4	6901.4
CDK5 regulatory subunit-associated protein 3 OS=Homo sapiens OX=9606 GN=CDK5RAP3 PE=1 SV=2	CDK5RAP3	71.9	108.1	87.3	102.4	88.6	101	104	100.6	93.6	97.9
60 kDa heat shock protein, mitochondrial OS=Homo sapiens OX=9606 GN=HSPD1 PE=1 SV=2	HSPD1	64290.8	82954.2	90609	73394.1	67514.6	82069.3	71529.8	75065	80205.9	74632.3
DDB1- and CUL4-associated factor 13 OS=Homo sapiens OX=9606 GN=DCAF13 PE=1 SV=1	DCAF13	113.4	195.7	145.6	193	203.9	137	196.4	222.5	177.5	181.6
Ubiquilin-2 OS=Homo sapiens OX=9606 GN=UBQLN2 PE=1 SV=2	UBQLN2	189.1	236.8	222	294.6	235.4	247.6	248	227.9	254	256.5
Elongin-B OS=Homo sapiens OX=9606 GN=ELOB PE=1 SV=1	ELOB	1399.5	1740.4	1914.5	1634.4	1344.3	1690.7	1695.9	1669.6	1905.1	1780.9
Ubiquitin-conjugating enzyme E2 E1 (Fragment) OS=Homo sapiens OX=9606 GN=UBE2E1 PE=1 SV=1	UBE2E1	856.4	968.2	962.8	1098.7	937.7	978.3	1210.2	987.7	1141.7	1021.3
26S proteasome non-ATPase regulatory subunit 9 OS=Homo sapiens OX=9606 GN=PSMD9 PE=1 SV=3	PSMD9	675.5	841.8	863.3	764.9	607.2	815.9	780.3	768	874.4	849.6
U4/U6 small nuclear ribonucleoprotein Prp4 OS=Homo sapiens OX=9606 GN=PRPF4 PE=1 SV=2	PRPF4	1128.2	1588.2	1366.2	1581.1	1401.1	1390	1551.5	1481.5	1519.4	1316.4
Nucleoporin Nup37 OS=Homo sapiens OX=9606 GN=NUP37 PE=1 SV=1	NUP37	823.3	1095.8	987.3	1198.9	1016.6	1000	1082.8	1021.1	1020.1	948.2
DNA-dependent protein kinase catalytic subunit OS=Homo sapiens OX=9606 GN=PRKDC PE=1 SV=3	PRKDC	12334.4	18083.3	15222.8	18359	18250	14883.6	20089.2	19651.7	16541.9	17482.7
Proteasome subunit alpha type-4 OS=Homo sapiens OX=9606 GN=PSMA4 PE=1 SV=1	PSMA4	3803.9	4857.2	4341.8	5183.3	3966.6	4590.1	4821.6	4510.1	4714.8	4307.3
Mediator of RNA polymerase II transcription subunit 21 OS=Homo sapiens OX=9606 GN=MED21 PE=1 SV=1	MED21	146.3	194.6	180.1	186.8	153.6	189.1	176	171.2	186.3	169.6
Nuclear pore complex protein Nup205 OS=Homo sapiens OX=9606 GN=NUP205 PE=1 SV=3	NUP205	3287	4703.1	3915.1	4784.3	4470.8	3967.8	4805	4526.2	4366.9	4190.3
Treacle protein OS=Homo sapiens OX=9606 GN=TCOF1 PE=1 SV=1	TCOF1	1135.6	1564.1	1435.2	1627.9	1350.1	1449.1	1487	1471	1505.8	1522.3
Pescadillo homolog OS=Homo sapiens OX=9606 GN=PES1 PE=1 SV=1	PES1	918.9	1391.7	1105.9	1370.2	1365.5	1058.6	1476.1	1409.7	1316.8	1265.7
Complex I-B15 OS=Homo sapiens OX=9606 GN=NDUFB4 PE=1 SV=1	NDUFB4	60.3	91.6	82.1	65	81.4	68.2	89.3	84.2	90.5	92.8
Diphthine methyl ester synthase OS=Homo sapiens OX=9606 GN=DPH5 PE=1 SV=2	DPH5	305.6	306.8	324.2	352.6	326.1	358.1	377.7	314.4	384.2	360
Tubulin-specific chaperone E OS=Homo sapiens OX=9606 GN=TBCE PE=1 SV=1	TBCE	557.6	639.3	667.5	703.8	541.5	650.8	672.3	604.7	676.5	650.5
E3 ubiquitin-protein ligase RNF138 OS=Homo sapiens OX=9606 GN=RNF138 PE=1 SV=1	RNF138	88.8	120.8	114.4	92.7	101.4	103.5	117.4	117.2	115.8	118.5
Serine/threonine-protein kinase mTOR OS=Homo sapiens OX=9606 GN=MTOR PE=1 SV=1	MTOR	30.7	31.1	34.1	33.2	31.2	31.3	30.7	32.8	32.6	34.8
Transferrin receptor protein 1 OS=Homo sapiens OX=9606 GN=TFRC PE=1 SV=2	TFRC	2762.6	3805.5	3342	3328.5	3056.4	3408	3565.5	3320.6	3501.1	3372.8
40S ribosomal protein S15a OS=Homo sapiens OX=9606 GN=RPS15A PE=1 SV=1	RPS15A	29.8	38.3	32.7	35.1	38.5	21.7	43.8	37	33.7	30.8
Galactose mutarotase OS=Homo sapiens OX=9606 GN=GALM PE=1 SV=1	GALM	483.2	587.3	529.5	613.3	492.7	528.4	590	542.3	532.7	546.2
Dynactin subunit 2 OS=Homo sapiens OX=9606 GN=DCTN2 PE=1 SV=4	DCTN2	5038.6	6176.1	6110.2	5848.6	4725.5	6071.7	5555.4	5558.5	6022	5518.1
ATPase family protein 2 homolog OS=Homo sapiens OX=9606 GN=SPATA5 PE=4 SV=1	SPATA5	17.9	25	23.3	31.6	21.3	27.4	26	23.5	23.9	23.5
(E3-independent) E2 ubiquitin-conjugating enzyme OS=Homo sapiens OX=9606 GN=UBE2O PE=1 SV=3	UBE2O	1951.7	2340.4	2215.2	2463.8	1950.5	2318.9	2508.9	2231	2409.4	2150
Zinc finger and BTB domain-containing protein 10 OS=Homo sapiens OX=9606 GN=ZBTB10 PE=1 SV=2	ZBTB10	57.6	52	59.3	79.4	75.3	54.7	68	58.2	76.1	89
NK-tumor recognition protein OS=Homo sapiens OX=9606 GN=NKTR PE=1 SV=2	NKTR	270.1	370.6	280.5	382.5	333.1	325.4	396.9	367.2	357.5	292.2
YTH domain-containing family protein 2 OS=Homo sapiens OX=9606 GN=YTHDF2 PE=1 SV=2	YTHDF2	471	607.3	555.4	615.7	506.8	584.4	595.5	572.2	590.5	536.5
Aspartate--tRNA ligase, cytoplasmic OS=Homo sapiens OX=9606 GN=DARS1 PE=1 SV=2	DARS1	4186.6	5706.2	4825.6	5932.2	4852	5040.9	5639	5520.2	5232.4	4826.4
DnaJ homolog subfamily C member 2 OS=Homo sapiens OX=9606 GN=DNAJC2 PE=1 SV=4	DNAJC2	24.9	34.1	31	42.8	33.9	30	35.8	39.8	34.7	31.1
A-kinase anchor protein 12 OS=Homo sapiens OX=9606 GN=AKAP12 PE=1 SV=4	AKAP12	4482.6	5866.8	5449.6	6207.8	4928.8	6022.7	5791.1	5364.5	5950.2	5246.3
DNA-directed RNA polymerase III subunit RPC3 OS=Homo sapiens OX=9606 GN=POLR3C PE=1 SV=1	POLR3C	126.3	205.4	150.3	186.1	168	166.1	188.9	176.9	178.4	180.9
Cytochrome c oxidase subunit 5B, mitochondrial OS=Homo sapiens OX=9606 GN=COX5B PE=1 SV=2	COX5B	1979.6	3126.3	3121.8	1857.8	2064.1	2384.7	2180.7	2338	2749.6	2858
Splicing factor, suppressor of white-apricot homolog OS=Homo sapiens OX=9606 GN=SFSWAP PE=1 SV=3	SFSWAP	79	109.6	97.8	108.7	84.9	97.4	96.2	100.3	98.4	93.6
Thymosin beta-4 OS=Homo sapiens OX=9606 GN=TMSB4X PE=1 SV=2	TMSB4X	397.7	202.5	265.9	303.4	308.1	282.8	245	272.1	181.7	618.7
28S ribosomal protein S28, mitochondrial OS=Homo sapiens OX=9606 GN=MRPS28 PE=1 SV=1	MRPS28	767.5	989.2	962.4	970.2	855.2	1084.7	954.4	983.5	1002.3	914.4
Proteasome subunit beta type-4 OS=Homo sapiens OX=9606 GN=PSMB4 PE=1 SV=4	PSMB4	1802.4	2249	2043.7	2363.9	1799.4	2196.9	2225	2089.2	2070.5	1778.8
39S ribosomal protein L12, mitochondrial OS=Homo sapiens OX=9606 GN=MRPL12 PE=1 SV=2	MRPL12	1083.7	1371.4	1400.1	1261.4	1118.9	1304.2	1200.9	1254.4	1345.7	1334.9
Structural maintenance of chromosomes protein 6 OS=Homo sapiens OX=9606 GN=SMC6 PE=1 SV=2	SMC6	28	35.1	31.6	40.1	29.8	33	38.5	38.9	35.6	32.8
Protein LSM14 homolog B (Fragment) OS=Homo sapiens OX=9606 GN=LSM14B PE=1 SV=1	LSM14B	204.8	324.6	260	342.5	245.1	246.5	261.3	279	252.3	270.3
Transportin-1 OS=Homo sapiens OX=9606 GN=TNPO1 PE=1 SV=2	TNPO1	2703.6	3381.7	3040.8	3581.5	2773.8	3251.8	3347.4	3177.7	3225.8	3027.9
WD repeat domain phosphoinositide-interacting protein 2 OS=Homo sapiens OX=9606 GN=WIPI2 PE=1 SV=1	WIPI2	112.2	147.6	132.1	153.4	133.8	135	145.3	143.7	125.4	128.3
Zinc finger CCCH-type antiviral protein 1 OS=Homo sapiens OX=9606 GN=ZC3HAV1 PE=1 SV=3	ZC3HAV1	572.7	868.8	653.7	856.6	802.1	689.1	916.9	893.6	799.7	817.4
Ankyrin repeat and KH domain-containing protein 1 OS=Homo sapiens OX=9606 GN=ANKHD1 PE=1 SV=1	ANKHD1	257.9	352.3	303	415.2	305.3	329.1	357.4	309.7	342.7	323.6
Tumor susceptibility gene 101 protein OS=Homo sapiens OX=9606 GN=TSG101 PE=1 SV=1	TSG101	212.7	256.3	230	325	258.4	256	256.5	241.1	237.8	223.8
Copine-1 OS=Homo sapiens OX=9606 GN=CPNE1 PE=1 SV=1	CPNE1	672.3	732.1	757	875	683.5	805.7	810.7	753.6	838.5	816.6
Ribonucleoprotein PTB-binding 1 OS=Homo sapiens OX=9606 GN=RAVER1 PE=1 SV=1	RAVER1	1260.4	1687.9	1668.2	1712.4	1475.4	1587.6	1624.1	1612.7	1638.3	1634
Ceroid-lipofuscinosis neuronal protein 6 OS=Homo sapiens OX=9606 GN=CLN6 PE=4 SV=1	CLN6	855.9	1217.2	929	1322.8	1392.1	791.2	1626.5	1354.4	1265.2	1182.1
Putative peptidyl-tRNA hydrolase PTRHD1 OS=Homo sapiens OX=9606 GN=PTRHD1 PE=1 SV=1	PTRHD1	643.9	886.6	1179.6	685	609.1	773.7	780.6	790.8	1032.1	1044.8
Ubiquitin-associated domain-containing protein 1 OS=Homo sapiens OX=9606 GN=UBAC1 PE=1 SV=1	UBAC1	134.1	166.9	180.5	168.2	149.1	165.5	164.2	155.6	162.5	163.6
AP-2 complex subunit beta OS=Homo sapiens OX=9606 GN=AP2B1 PE=1 SV=1	AP2B1	3107.2	3646.6	3845.2	3951.4	3561.1	3735.3	3871.9	3676.9	3886.1	3513.8
Tubulin alpha-1B chain OS=Homo sapiens OX=9606 GN=TUBA1B PE=1 SV=1	TUBA1B	6678.8	8135.6	7705.6	8379.5	6840.3	8022.6	8129.4	7890.6	7802.4	7525.1
14-3-3 protein beta/alpha OS=Homo sapiens OX=9606 GN=YWHAB PE=1 SV=3	YWHAB	4869.3	6134.9	5541.6	6462.5	4792.5	5930.1	6026.4	5658.7	6022.5	5366.5
Translation machinery-associated protein 16 (Fragment) OS=Homo sapiens OX=9606 GN=TMA16 PE=1 SV=1	TMA16	151.2	322.1	195.9	234.5	251.5	151.5	252	272	234.5	276.6
Pseudouridine-5'-phosphatase OS=Homo sapiens OX=9606 GN=PUDP PE=1 SV=3	PUDP	623.1	667.7	722.9	712.5	592	728.7	679.1	669.9	681.7	714.9
Cell division cycle protein 23 homolog OS=Homo sapiens OX=9606 GN=CDC23 PE=1 SV=3	CDC23	155.3	200.7	180.2	220.6	193.8	186.6	219.6	193.1	199	176.2
Eukaryotic translation initiation factor 3 subunit K OS=Homo sapiens OX=9606 GN=EIF3K PE=1 SV=1	EIF3K	2348.2	2810.9	2583.4	3121.3	2278	2870.9	2608.7	2645.3	2497	2505.8
Poly(A) polymerase alpha OS=Homo sapiens OX=9606 GN=PAPOLA PE=1 SV=4	PAPOLA	970.7	1268.2	1082.1	1348.5	1077.5	1166.8	1324	1207.8	1217.9	1129.2
10 kDa heat shock protein, mitochondrial OS=Homo sapiens OX=9606 GN=HSPE1-MOB4 PE=1 SV=1	HSPE1-MOB4	429.8	512.5	493.8	569.7	455.8	526.9	551.4	504.1	535.3	461.3
Asparagine synthetase [glutamine-hydrolyzing] OS=Homo sapiens OX=9606 GN=ASNS PE=1 SV=4	ASNS	1736.2	2366.6	1870.8	2489.7	2127.9	2041.7	2487.4	2632	2042.6	2337.2
Protein phosphatase 1G OS=Homo sapiens OX=9606 GN=PPM1G PE=1 SV=1	PPM1G	5681.4	7107.1	6844.5	7181.4	5765.3	6720.4	6986.1	6544.3	7034.1	6380.3
Neurogenic locus notch homolog protein 2 OS=Homo sapiens OX=9606 GN=NOTCH2 PE=1 SV=3	NOTCH2	40	46.2	44.8	50.7	41.4	45.3	45.5	47.5	45.1	45.5
DnaJ homolog subfamily C member 7 OS=Homo sapiens OX=9606 GN=DNAJC7 PE=1 SV=1	DNAJC7	2813.6	4359.9	3171.8	4099	3755.6	3266.3	4504.9	4094.9	3918.4	3679
BolA-like protein 2 OS=Homo sapiens OX=9606 GN=BOLA2 PE=1 SV=1	BOLA2	661.7	768.8	827.8	607.4	515.2	786.4	755.6	771.6	879.1	873.4
CLIP-associating protein 2 OS=Homo sapiens OX=9606 GN=CLASP2 PE=1 SV=1	CLASP2	298.8	415.4	329	389.5	342.8	315.7	408.4	395.2	384.4	364.6
Transcription factor BTF3 homolog 4 OS=Homo sapiens OX=9606 GN=BTF3L4 PE=1 SV=1	BTF3L4	870.7	1170.1	1059.8	1168.2	927.8	1048.4	1150.1	1021.7	1073.8	1026.6
Tubulin beta-3 chain OS=Homo sapiens OX=9606 GN=TUBB3 PE=1 SV=2	TUBB3	242.1	278.6	274.5	302.3	232.2	291.4	268.4	280	273.5	259.3
V-type proton ATPase catalytic subunit A OS=Homo sapiens OX=9606 GN=ATP6V1A PE=1 SV=2	ATP6V1A	2602.2	3307.2	3105.5	3497.9	2774.8	3285.9	3329.9	3168.8	3308.5	3014.8
Small nuclear ribonucleoprotein E OS=Homo sapiens OX=9606 GN=SNRPE PE=1 SV=1	SNRPE	814.7	1008.7	858.2	1092.3	888.8	978	1013.5	1026.7	942.3	968.5
Periodic tryptophan protein 2 homolog OS=Homo sapiens OX=9606 GN=PWP2 PE=2 SV=2	PWP2	294.6	427.6	352.2	446.9	418.6	372.5	419.7	419	375.4	394.5
TATA-binding protein-associated factor 172 OS=Homo sapiens OX=9606 GN=BTAF1 PE=1 SV=1	BTAF1	8	11	9.8	11.7	10	9.6	11.7	10.8	7.5	10.6
Sorting nexin-2 OS=Homo sapiens OX=9606 GN=SNX2 PE=1 SV=2	SNX2	2200.8	2566.3	2391.6	2778	2223.8	2640.3	2637.7	2469.2	2590.1	2397.3
Ubiquitin-like domain-containing CTD phosphatase 1 OS=Homo sapiens OX=9606 GN=UBLCP1 PE=1 SV=2	UBLCP1	167.8	232.8	175.4	239.7	207.4	201.2	234.1	226.7	213.5	215
ATP-dependent zinc metalloprotease YME1L1 OS=Homo sapiens OX=9606 GN=YME1L1 PE=1 SV=1	YME1L1	398.3	634.2	493.5	469	523.6	478	574.9	513.5	552.3	550
WD repeat-containing protein WRAP73 (Fragment) OS=Homo sapiens OX=9606 GN=WRAP73 PE=1 SV=1	WRAP73	52.9	67.6	51.5	66.1	57.5	71.4	66.4	71.7	52.5	56.6
Epididymal secretory protein E1 OS=Homo sapiens OX=9606 GN=NPC2 PE=1 SV=1	NPC2	173.1	189.5	242.5	207.5	181.6	207.7	191.4	172.8	220.9	176.1
Glutamate--cysteine ligase regulatory subunit OS=Homo sapiens OX=9606 GN=GCLM PE=1 SV=1	GCLM	366.7	488.2	439.5	498.5	377.4	434.1	479.3	458.4	457.4	442.4
Eukaryotic translation initiation factor 3 subunit L OS=Homo sapiens OX=9606 GN=EIF3L PE=1 SV=1	EIF3L	5503	7441.6	6345.5	7740.6	6449.9	6594.2	7665.7	7184.8	6956.1	6563.7
Cartilage-associated protein OS=Homo sapiens OX=9606 GN=CRTAP PE=1 SV=1	CRTAP	83.1	120.1	103.6	137	105	113.4	117.8	120.5	102.8	100.4
Conserved oligomeric Golgi complex subunit 6 OS=Homo sapiens OX=9606 GN=COG6 PE=1 SV=2	COG6	164	190.5	192.7	205.1	194.4	192.5	208.7	196.2	196.6	205.1
Integrator complex subunit 13 (Fragment) OS=Homo sapiens OX=9606 GN=INTS13 PE=1 SV=1	INTS13	56	61	59.9	74.2	61.6	67.1	67.4	68.1	65.2	63.6
160 kDa neurofilament protein OS=Homo sapiens OX=9606 GN=NEFM PE=1 SV=1	NEFM	1671.6	2195.3	2041	2408.9	1959.4	2493.8	2069.5	2197.4	2203.6	2149.3
Ubiquitin-conjugating enzyme E2 N OS=Homo sapiens OX=9606 GN=UBE2N PE=1 SV=1	UBE2N	4085	4893.3	4811.3	5019.7	3843	4894	4795	4596.9	4809.4	4697
Histone H2B type 3-B OS=Homo sapiens OX=9606 GN=H2BU1 PE=1 SV=3	H2BU1	184	322.2	232.4	315.9	312.7	220.5	324	334.6	283.1	290.8
m7GpppX diphosphatase OS=Homo sapiens OX=9606 GN=DCPS PE=1 SV=2	DCPS	1110.5	1514.8	1317.8	1602.5	1242.5	1331.3	1510.5	1427	1490.8	1342.7
NADH dehydrogenase [ubiquinone] 1 beta subcomplex subunit 1 OS=Homo sapiens OX=9606 GN=NDUFB1 PE=1 SV=1	NDUFB1	319.4	420.1	475.4	283.5	393.1	290.2	411.9	355	475.1	460
Microsomal signal peptidase 25 kDa subunit OS=Homo sapiens OX=9606 GN=SPCS2 PE=1 SV=1	SPCS2	160.1	240.5	225.9	154.6	223.3	153.5	235.8	192.9	218.1	245.7
BRCA1-associated protein OS=Homo sapiens OX=9606 GN=BRAP PE=1 SV=1	BRAP	104.9	129	113.6	137.8	104.9	130.2	136.5	115.7	125.8	107.4
Signal peptidase complex catalytic subunit SEC11 OS=Homo sapiens OX=9606 GN=SEC11A PE=1 SV=1	SEC11A	80.7	137.7	125.3	75.9	130.6	81.7	137.6	127.6	143.3	141.1
Ras-related protein Rab-11A OS=Homo sapiens OX=9606 GN=RAB11A PE=1 SV=3	RAB11A	110.6	217.2	163.8	189.4	138.7	187.6	187	166.7	185.7	144.5
Cytochrome b-c1 complex subunit 8 OS=Homo sapiens OX=9606 GN=UQCRQ PE=1 SV=4	UQCRQ	175.7	319.1	218.5	245.4	231	210.4	275.6	256.2	212.6	260.1
Origin recognition complex subunit 3 OS=Homo sapiens OX=9606 GN=ORC3 PE=1 SV=1	ORC3	34	57.1	37.2	52.3	37.6	40.7	47.9	40.2	41.2	42
HEAT repeat-containing protein 3 OS=Homo sapiens OX=9606 GN=HEATR3 PE=1 SV=2	HEATR3	253.9	314.4	289.9	349.4	311.7	292.9	353.8	324.2	333	320.7
Vinculin OS=Homo sapiens OX=9606 GN=VCL PE=1 SV=4	VCL	10353.5	12855.4	11931.3	14240.6	10133	12648.2	12602.8	11570.4	12845.6	11447.1
39S ribosomal protein L45, mitochondrial OS=Homo sapiens OX=9606 GN=MRPL45 PE=1 SV=1	MRPL45	180.3	331.9	228.2	302.2	287.4	241.7	325.3	339.9	274.1	274.8
RING-type E3 ubiquitin-protein ligase PPIL2 OS=Homo sapiens OX=9606 GN=PPIL2 PE=1 SV=1	PPIL2	58.3	95.9	69.1	82.9	75.9	67.1	90.9	96.8	79	90.3
Delta-1-pyrroline-5-carboxylate synthase OS=Homo sapiens OX=9606 GN=ALDH18A1 PE=1 SV=2	ALDH18A1	3366.4	5029.9	4134.9	4860.4	5024.7	4029.3	4985.7	4970.3	4416.7	4248.8
CCR4-NOT transcription complex subunit 2 (Fragment) OS=Homo sapiens OX=9606 GN=CNOT2 PE=1 SV=1	CNOT2	52.3	55.9	47.1	55.5	50.1	56.2	57.1	57.1	52.9	49.3
NADH dehydrogenase [ubiquinone] flavoprotein 1, mitochondrial OS=Homo sapiens OX=9606 GN=NDUFV1 PE=1 SV=1	NDUFV1	165.5	202.3	211.3	236.8	233.6	198.1	217.4	230.6	207.3	222.5
A-kinase anchor protein 8-like OS=Homo sapiens OX=9606 GN=AKAP8L PE=1 SV=4	AKAP8L	571	748	764.4	720.1	620.3	696.3	661.9	663.6	737.6	678.5
Chromosome alignment-maintaining phosphoprotein 1 OS=Homo sapiens OX=9606 GN=CHAMP1 PE=1 SV=2	CHAMP1	336.7	430.6	444.4	501.4	422.2	453.2	472.5	441.6	477.5	459.5
Splicing factor U2AF 65 kDa subunit OS=Homo sapiens OX=9606 GN=U2AF2 PE=1 SV=4	U2AF2	3447.2	4275.2	5316.6	3098	3120.6	4120.7	4042.7	4425.4	4769.9	4774.9
Rotatin OS=Homo sapiens OX=9606 GN=RTTN PE=1 SV=1	RTTN	446.7	723.9	541.7	786.7	699.9	534.4	908.3	877.1	726.9	697.1
Tether containing UBX domain for GLUT4 OS=Homo sapiens OX=9606 GN=ASPSCR1 PE=1 SV=1	ASPSCR1	216	251.4	256	257.2	217.3	257.9	246.1	256.7	259.9	244.4
Mitochondrial import receptor subunit TOM7 homolog OS=Homo sapiens OX=9606 GN=TOMM7 PE=1 SV=1	TOMM7	152.3	187.9	186.8	124.5	169.2	137	184.4	166.7	171.3	185.1
Arginase-2, mitochondrial OS=Homo sapiens OX=9606 GN=ARG2 PE=1 SV=1	ARG2	273.8	374.4	364.3	312.4	303	344.9	325.4	321.3	359.7	331.6
Proteasome subunit alpha type-6 OS=Homo sapiens OX=9606 GN=PSMA6 PE=1 SV=1	PSMA6	6953.9	8176.7	7821.1	8820	6965.4	8307.4	8209.3	7879.6	8212.2	7701.9
Lon protease homolog, mitochondrial OS=Homo sapiens OX=9606 GN=LONP1 PE=1 SV=1	LONP1	634	1033.7	805.3	991.2	983.4	818	983.5	1056.8	943.2	913.4
Eukaryotic translation initiation factor 4H OS=Homo sapiens OX=9606 GN=EIF4H PE=1 SV=5	EIF4H	2412.7	3465.5	4501.5	2503.8	2149.9	2883.2	2398.1	3098.5	4226.4	4466.7
DNA mismatch repair protein Msh6 OS=Homo sapiens OX=9606 GN=MSH6 PE=1 SV=2	MSH6	3836.8	5495.8	4324.2	5412.5	5096.7	4298.7	6020.8	5537.4	5150.6	4828.3
E3 ubiquitin-protein ligase TRIM33 OS=Homo sapiens OX=9606 GN=TRIM33 PE=1 SV=3	TRIM33	418.9	476.8	462.7	552.6	426.9	500.4	517.8	477	501.8	460
Nuclear transcription factor Y subunit alpha OS=Homo sapiens OX=9606 GN=NFYA PE=1 SV=2	NFYA	167.2	210.9	209.8	203.5	173.9	199.8	211.7	180.6	196.8	165.1
Acylamino-acid-releasing enzyme OS=Homo sapiens OX=9606 GN=APEH PE=1 SV=4	APEH	617.1	737.9	682.7	816.6	602.5	729.1	729.7	693.2	722.7	695.2
V-type proton ATPase subunit H OS=Homo sapiens OX=9606 GN=ATP6V1H PE=1 SV=1	ATP6V1H	794.9	995	903.6	1103.7	906.4	945.9	1006.4	1046.6	995.4	990.6
Splicing factor ESS-2 homolog OS=Homo sapiens OX=9606 GN=ESS2 PE=1 SV=1	ESS2	170.4	224.9	218	209	170.1	203.6	171.1	206	224.2	236.7
Perilipin-3 OS=Homo sapiens OX=9606 GN=PLIN3 PE=1 SV=3	PLIN3	2188.4	2567.4	2580	2702.6	2046.9	2659.3	2441.4	2493.8	2566.9	2468.1
Neuronal-specific septin-3 OS=Homo sapiens OX=9606 GN=SEPTIN3 PE=1 SV=1	SEPTIN3	366.3	461.8	441	457	392.7	458.2	437.9	447.1	450.9	396.6
Deoxynucleotidyltransferase terminal-interacting protein 2 OS=Homo sapiens OX=9606 GN=DNTTIP2 PE=1 SV=2	DNTTIP2	295.8	453.9	385.2	454.3	467	334.3	489.9	443.7	431.7	415.3
Dynactin subunit 1 OS=Homo sapiens OX=9606 GN=DCTN1 PE=1 SV=1	DCTN1	5318.2	6385.2	6265.5	6722.3	5278	6524.2	6235.9	6025.7	6188.9	5779
H/ACA ribonucleoprotein complex subunit 2 OS=Homo sapiens OX=9606 GN=NHP2 PE=1 SV=1	NHP2	954.2	1352.6	1299	1254.1	1077.5	1143.6	1152.8	1178.4	1222.2	1177.2
WW domain-binding protein 2 OS=Homo sapiens OX=9606 GN=WBP2 PE=1 SV=1	WBP2	226.8	284.7	274.5	263.5	198.6	270.7	274.4	240.6	270.8	241.9
Golgi reassembly-stacking protein 2 OS=Homo sapiens OX=9606 GN=GORASP2 PE=1 SV=3	GORASP2	1407	1742	1730.5	1638.2	1393.4	1677.9	1673.3	1589.3	1790.4	1626.6
40S ribosomal protein S5 (Fragment) OS=Homo sapiens OX=9606 GN=RPS5 PE=1 SV=1	RPS5	3572.8	4759.3	4086.5	4612.2	4434.3	3759.9	5237.7	4991.6	4377.4	4721.1
Nuclear pore complex protein Nup50 OS=Homo sapiens OX=9606 GN=NUP50 PE=1 SV=2	NUP50	1334.6	1852.7	1682.4	1911.8	1487	1916.5	1696.4	1723.2	1714.4	1622.4
Retinol dehydrogenase 11 OS=Homo sapiens OX=9606 GN=RDH11 PE=1 SV=2	RDH11	204.5	328.5	271.4	233.9	295.3	219.7	328.6	274.9	292	282.6
Prolyl 3-hydroxylase 1 OS=Homo sapiens OX=9606 GN=P3H1 PE=1 SV=2	P3H1	447.2	543.8	557.2	598.6	542.5	536.6	589.4	493.7	568	471.7
Eukaryotic initiation factor 4A-III OS=Homo sapiens OX=9606 GN=EIF4A3 PE=1 SV=4	EIF4A3	6449.4	8917.2	7362.6	9174.9	7738.8	8221.3	8706.2	8846	7981.1	7945
Dual specificity mitogen-activated protein kinase kinase 2 OS=Homo sapiens OX=9606 GN=MAP2K2 PE=1 SV=1	MAP2K2	828.8	1110.4	925.8	1229.9	858.2	1000.2	927.5	968.3	859.3	936.6
U4/U6.U5 small nuclear ribonucleoprotein 27 kDa protein OS=Homo sapiens OX=9606 GN=SNRNP27 PE=1 SV=1	SNRNP27	147.4	201.4	200.8	203.4	166.8	175.7	185.3	187.1	195.4	193.9
60S ribosomal protein L12 OS=Homo sapiens OX=9606 GN=RPL12 PE=1 SV=1	RPL12	6644.4	8993.4	7653.7	9053.9	7144.4	8336	8780.5	8492.2	8023.4	7548
U1 small nuclear ribonucleoprotein 70 kDa OS=Homo sapiens OX=9606 GN=SNRNP70 PE=1 SV=2	SNRNP70	2521.1	4453.2	3664	3112.6	3557.6	2403.8	3596.4	3711.4	3550	4030.8
U3 small nucleolar RNA-associated protein 14 homolog A OS=Homo sapiens OX=9606 GN=UTP14A PE=1 SV=1	UTP14A	809.9	1294.4	1057.8	1189.6	1186.5	879.3	1263.4	1168.5	1181.4	1191.4
Ubiquitin-protein ligase E3C OS=Homo sapiens OX=9606 GN=UBE3C PE=1 SV=3	UBE3C	15.1	20.2	14.5	22.5	15.9	18	20.4	20.7	16.4	17.3
Transcription elongation factor A protein-like 4 (Fragment) OS=Homo sapiens OX=9606 GN=TCEAL4 PE=1 SV=1	TCEAL4	315.7	407.3	359.3	446.1	304.6	394.5	362.1	363.5	348.7	344.8
26S proteasome regulatory subunit 8 OS=Homo sapiens OX=9606 GN=PSMC5 PE=1 SV=1	PSMC5	4968.6	6215.8	5937.5	6408.9	4964.7	6180.8	6174.1	5680.2	6053.3	5410.8
Galactokinase OS=Homo sapiens OX=9606 GN=GALK1 PE=1 SV=1	GALK1	1421.9	1671.4	1540.5	1760.7	1319.9	1622.8	1537	1559.5	1683.8	1538.8
Anaphase-promoting complex subunit 7 OS=Homo sapiens OX=9606 GN=ANAPC7 PE=1 SV=4	ANAPC7	499.7	722.6	640.9	747.1	617.7	601.7	704.7	675.6	652.3	629.8
DNA topoisomerase 2-binding protein 1 OS=Homo sapiens OX=9606 GN=TOPBP1 PE=1 SV=3	TOPBP1	21.7	24.5	24.2	20.1	20	17.9	23.9	23	21	25.2
Proteasome subunit beta type-6 OS=Homo sapiens OX=9606 GN=PSMB6 PE=1 SV=4	PSMB6	2095.6	2267.9	2226.4	2444.7	1976.4	2423.6	2360.9	2231	2319.1	2243.4
V-type proton ATPase subunit D OS=Homo sapiens OX=9606 GN=ATP6V1D PE=1 SV=1	ATP6V1D	148.2	228.1	165.5	223.9	214.2	176.4	226.8	228.4	196.2	192.7
Nucleoside diphosphate kinase OS=Homo sapiens OX=9606 GN=NME1-NME2 PE=1 SV=1	NME1-NME2	5127	6129.1	6194.6	6913.2	4958	6431.2	5970.3	6005.2	6005.1	6106.6
FACT complex subunit SPT16 OS=Homo sapiens OX=9606 GN=SUPT16H PE=1 SV=1	SUPT16H	4110.3	5700.5	4644.7	6033.5	5220.4	4890.8	6235.1	5811.7	5284	4839.7
14-3-3 protein epsilon OS=Homo sapiens OX=9606 GN=YWHAE PE=1 SV=1	YWHAE	15234.8	18449.8	17195.1	19418.4	15013.5	18125.1	18432.2	17315.6	18364.6	16828.2
Tubulin beta-4A chain OS=Homo sapiens OX=9606 GN=TUBB4A PE=1 SV=2	TUBB4A	729.5	824.1	817.5	891.6	693.3	820.7	802.9	791.6	883.4	859.7
Zinc finger CCCH domain-containing protein 14 OS=Homo sapiens OX=9606 GN=ZC3H14 PE=1 SV=1	ZC3H14	528.3	747.2	755	755.3	609.9	733	672.7	705.1	715.1	710.3
Poly(rC)-binding protein 2 OS=Homo sapiens OX=9606 GN=PCBP2 PE=1 SV=1	PCBP2	3034.5	2967	3322.1	3640.3	2875.8	3587.8	3414.1	3279.7	3444.5	3393.3
39S ribosomal protein L16, mitochondrial OS=Homo sapiens OX=9606 GN=MRPL16 PE=1 SV=1	MRPL16	163.5	258.2	199.9	212.1	259.5	176.5	260.2	267.3	200.7	234.4
Isocitrate dehydrogenase [NAD] subunit alpha, mitochondrial OS=Homo sapiens OX=9606 GN=IDH3A PE=1 SV=1	IDH3A	2062.6	2888	2638	2674.2	2353.4	2813.7	2721.4	2664.3	2713.6	2435.4
Sorting nexin-5 OS=Homo sapiens OX=9606 GN=SNX5 PE=1 SV=1	SNX5	1654	2017.9	1887.1	2064.8	1681.9	1872.7	2084.3	1905	1954.1	1771.9
Glycogenin 1, isoform CRA_e OS=Homo sapiens OX=9606 GN=GYG1 PE=1 SV=1	GYG1	224.5	192.9	221.8	286.8	221.3	222.9	233.4	229.4	234	240.6
Transformer-2 protein homolog alpha OS=Homo sapiens OX=9606 GN=TRA2A PE=1 SV=1	TRA2A	170.1	239.3	255.2	227.1	203	202.2	187.5	212.8	240.8	249
Double-strand-break repair protein rad21 homolog OS=Homo sapiens OX=9606 GN=RAD21 PE=1 SV=2	RAD21	632.2	776.7	798.6	801.8	700.8	757.4	754.7	718.8	767.9	687
COMMD3-BMI1 readthrough OS=Homo sapiens OX=9606 GN=COMMD3-BMI1 PE=4 SV=1	COMMD3-BMI1	131.1	203.2	173.7	172.6	176.7	145.6	197.6	195.2	201.9	176
DNA-directed RNA polymerase I subunit RPA34 OS=Homo sapiens OX=9606 GN=POLR1G PE=1 SV=1	POLR1G	33.1	46.8	43.4	44.1	49.7	38.1	55.5	43.8	43.2	43.3
Microtubule-associated protein RP/EB family member 2 OS=Homo sapiens OX=9606 GN=MAPRE2 PE=1 SV=1	MAPRE2	1414.8	1757.1	1427	1868.6	1628.9	1507.5	1882.6	1841.7	1595.6	1770.5
WD repeat-containing protein 6 OS=Homo sapiens OX=9606 GN=WDR6 PE=1 SV=1	WDR6	277.7	335.5	301.1	376.6	340.4	301.4	368.2	334.9	355.9	337.9
Tubulin alpha chain OS=Homo sapiens OX=9606 GN=TUBA1C PE=1 SV=1	TUBA1C	1779.7	2080.2	1992.7	2317.2	1772.2	2033.1	2078.3	2020	2016.9	1924.7
Survival of motor neuron-related-splicing factor 30 OS=Homo sapiens OX=9606 GN=SMNDC1 PE=1 SV=1	SMNDC1	965.7	1205.7	1112.2	1325.9	1082.2	1081.6	1172.5	1152.9	1129.6	1317.8
DnaJ homolog subfamily B member 11 OS=Homo sapiens OX=9606 GN=DNAJB11 PE=1 SV=1	DNAJB11	1119.8	1379.7	1543.3	1384.6	1320.4	1330.5	1449.4	1401	1534.4	1339.9
U4/U6.U5 tri-snRNP-associated protein 2 OS=Homo sapiens OX=9606 GN=USP39 PE=1 SV=2	USP39	362.8	555.5	447.2	530.7	488.7	410.1	571.9	574.1	501.8	517.6
Cold shock domain-containing protein E1 OS=Homo sapiens OX=9606 GN=CSDE1 PE=1 SV=2	CSDE1	6573.7	8058.7	7779.2	8562.5	6562.6	7893.5	8092.6	7215.4	8094.4	7096.7
PITH domain-containing protein 1 OS=Homo sapiens OX=9606 GN=PITHD1 PE=1 SV=1	PITHD1	339.2	413.6	420.3	491.2	369.7	406.9	402.1	401.9	431.5	418.7
Nucleolysin TIA-1 isoform p40 OS=Homo sapiens OX=9606 GN=TIA1 PE=1 SV=1	TIA1	28.4	45	39.1	48.9	29	43.7	33.3	39.4	37.8	35.9
T-complex protein 1 subunit theta OS=Homo sapiens OX=9606 GN=CCT8 PE=1 SV=4	CCT8	21653.4	26676.6	24711.7	28166.5	22031.7	26565.3	25905.8	25133.9	25259.4	23858.8
Peroxiredoxin-1 OS=Homo sapiens OX=9606 GN=PRDX1 PE=1 SV=1	PRDX1	15945.8	19299.4	18750.4	18296.1	15005	18923.8	18527.6	17836.7	18446.4	17781.6
Protein phosphatase 1F OS=Homo sapiens OX=9606 GN=PPM1F PE=1 SV=3	PPM1F	73	95.4	82.8	97.5	75.1	86.3	91	91.5	92.1	91.4
Pseudouridylate synthase 7 homolog OS=Homo sapiens OX=9606 GN=PUS7 PE=1 SV=2	PUS7	1141.8	1424.2	1252	1550.1	1177.4	1369.6	1383.6	1320.3	1323.7	1249.8
Ragulator complex protein LAMTOR2 OS=Homo sapiens OX=9606 GN=LAMTOR2 PE=1 SV=1	LAMTOR2	228.4	295.3	308.2	286.9	251	278	256.4	255.3	281.3	272.5
60S ribosomal protein L14 OS=Homo sapiens OX=9606 GN=RPL14 PE=1 SV=4	RPL14	1479.7	2216.8	1589.5	2348.1	1925.8	1631.6	2564.9	2552.9	1948.9	2090.6
UBX domain-containing protein 4 OS=Homo sapiens OX=9606 GN=UBXN4 PE=1 SV=2	UBXN4	93.9	165.4	142.4	118.4	141	115.5	160.7	134	156.2	140.1
RNA-binding protein 14 OS=Homo sapiens OX=9606 GN=RBM14 PE=1 SV=2	RBM14	3661.2	4839.4	4863.6	4570.4	4000.3	4755.5	4403.5	4366.6	4594.1	4342
Casein kinase I isoform epsilon OS=Homo sapiens OX=9606 GN=CSNK1E PE=1 SV=1	CSNK1E	858.4	1409.7	1027.2	1327.1	1278.2	1017.2	1492.3	1351.2	1165	1280.4
Vesicle-trafficking protein SEC22b OS=Homo sapiens OX=9606 GN=SEC22B PE=1 SV=4	SEC22B	392.8	629.6	496.1	495.3	521.5	465.5	558.6	553.3	470.4	559.5
Acylglycerol kinase, mitochondrial OS=Homo sapiens OX=9606 GN=AGK PE=1 SV=2	AGK	428.3	568.8	626.9	508.7	548.7	507.8	625.4	554	642.8	554.7
Serine/threonine-protein kinase PAK 2 OS=Homo sapiens OX=9606 GN=PAK2 PE=1 SV=3	PAK2	1620.7	2069.8	1816.8	2099.5	1616.4	1921.7	1953.7	1798.5	1988.3	1781.9
Cullin-2 OS=Homo sapiens OX=9606 GN=CUL2 PE=1 SV=2	CUL2	561.1	760.6	622.5	777.8	668.3	665.2	786.5	774.4	657.8	680.9
Small glutamine-rich tetratricopeptide repeat-containing protein beta OS=Homo sapiens OX=9606 GN=SGTB PE=1 SV=1	SGTB	42.3	43	53.7	59.3	41.6	53.4	51.9	51.6	51	45.1
Proline-rich protein PRCC OS=Homo sapiens OX=9606 GN=PRCC PE=1 SV=1	PRCC	548.5	681.2	726	684.7	605.3	682.1	661.2	635.7	703.1	628.9
DCN1-like protein OS=Homo sapiens OX=9606 GN=DCUN1D1 PE=1 SV=1	DCUN1D1	214.7	241.1	266.1	271.4	213	252.4	237.7	260.3	256	244.6
Adaptin ear-binding coat-associated protein 2 OS=Homo sapiens OX=9606 GN=NECAP2 PE=1 SV=1	NECAP2	212.5	263.4	274	170.5	159.7	251.9	238.1	240.9	278.2	263
SNW domain-containing protein 1 OS=Homo sapiens OX=9606 GN=SNW1 PE=1 SV=1	SNW1	961.3	1381.9	1141.9	1338	1173.7	1138.4	1321.2	1267.1	1268.5	1244.8
Activator of 90 kDa heat shock protein ATPase homolog 1 OS=Homo sapiens OX=9606 GN=AHSA1 PE=1 SV=1	AHSA1	2078.8	2469.7	2367.9	2662.2	2069.6	2415.9	2521.1	2381	2495.4	2246.8
H/ACA ribonucleoprotein complex subunit DKC1 OS=Homo sapiens OX=9606 GN=DKC1 PE=1 SV=3	DKC1	1239.5	2191.3	1486.1	2031.5	2294.3	1241	2397.4	2218.3	1915.2	1981.3
YTH domain-containing family protein 3 OS=Homo sapiens OX=9606 GN=YTHDF3 PE=1 SV=1	YTHDF3	64.9	91.4	94.5	87	73.3	81.1	74.7	76.9	82	80.3
PRKR-interacting protein 1 OS=Homo sapiens OX=9606 GN=PRKRIP1 PE=1 SV=1	PRKRIP1	195.5	246.9	212.4	249.7	211.4	209	239.4	237.3	234.4	237.6
WD40 repeat-containing protein SMU1 OS=Homo sapiens OX=9606 GN=SMU1 PE=1 SV=2	SMU1	1016.8	1176.1	1112.1	1353.7	1427.2	1030.1	1453	1354.3	1275.5	1216.1
Nucleolar RNA helicase 2 OS=Homo sapiens OX=9606 GN=DDX21 PE=1 SV=5	DDX21	7416	12519.6	9214	12591.2	11618	8781.2	14100.7	13802.5	11108.3	11657.9
Polyglutamine-binding protein 1 OS=Homo sapiens OX=9606 GN=PQBP1 PE=1 SV=1	PQBP1	792.2	1098	981	1123.8	824.8	1012.4	939.7	986.8	942.8	1011.3
Actin-related protein 2/3 complex subunit 4 OS=Homo sapiens OX=9606 GN=ARPC4 PE=1 SV=3	ARPC4	1262.4	1632.8	1423.4	1656.9	1418.6	1427.5	1676.2	1532.2	1561.3	1365.5
Clustered mitochondria protein homolog OS=Homo sapiens OX=9606 GN=CLUH PE=1 SV=1	CLUH	971.8	1299.1	1095.2	1389.6	1145	1150.8	1321.9	1285.4	1238.1	1235.3
Mannose-1-phosphate guanyltransferase beta OS=Homo sapiens OX=9606 GN=GMPPB PE=1 SV=2	GMPPB	246.9	270.2	276.6	315.3	257.3	285.8	276	289.9	281.8	278.7
Serine/threonine-protein phosphatase 2A 65 kDa regulatory subunit A alpha isoform OS=Homo sapiens OX=9606 GN=PPP2R1A PE=1 SV=4	PPP2R1A	7753.9	9132.6	8704.7	10103.5	7600.4	9348.2	9292	8696.5	8901.4	8223.9
Ubiquitin carboxyl-terminal hydrolase 24 OS=Homo sapiens OX=9606 GN=USP24 PE=1 SV=3	USP24	171.1	254.8	203	252.3	212.5	230.2	231.1	243.4	223.4	230
40S ribosomal protein S2 OS=Homo sapiens OX=9606 GN=RPS2 PE=1 SV=2	RPS2	6135.1	8694.9	7268.1	8776.2	8704.6	6452.1	10396	9451.3	8266.8	8477.2
Proliferating cell nuclear antigen OS=Homo sapiens OX=9606 GN=PCNA PE=1 SV=1	PCNA	7900.7	9208.9	9016.8	9688.8	7905.2	9268.6	9145.3	8977.3	9126.3	8668
Dynactin subunit 4 OS=Homo sapiens OX=9606 GN=DCTN4 PE=1 SV=1	DCTN4	118	138.6	128.4	166.8	161	107.4	153.3	147.5	157.1	144.1
ADP-ribosylation factor GTPase-activating protein 2 OS=Homo sapiens OX=9606 GN=ARFGAP2 PE=1 SV=1	ARFGAP2	800.3	952.9	856.8	1029.8	816.2	946.7	999.3	917.7	935	838.6
Nuclear pore complex protein Nup88 OS=Homo sapiens OX=9606 GN=NUP88 PE=1 SV=2	NUP88	117.3	148.6	137.7	163.8	138.2	141.5	144.4	138.4	147.2	146.7
Mothers against decapentaplegic homolog 2 OS=Homo sapiens OX=9606 GN=SMAD2 PE=1 SV=1	SMAD2	123.7	148.3	133.6	158.5	140	133	162.4	151.6	149.3	138.8
Integrator complex subunit 1 OS=Homo sapiens OX=9606 GN=INTS1 PE=1 SV=2	INTS1	364.2	470.2	390.3	488.4	377.2	431	499.9	470.3	451.8	391.2
ADP-ribose glycohydrolase ARH3 OS=Homo sapiens OX=9606 GN=ADPRS PE=1 SV=1	ADPRS	165.4	187.1	193.4	197	162.3	182.8	193.6	175.2	202.8	175.4
Serine/threonine-protein kinase N2 OS=Homo sapiens OX=9606 GN=PKN2 PE=1 SV=1	PKN2	1157.2	1511.1	1320.6	1584.7	1286.7	1341	1539.3	1399.4	1490.8	1353
Persulfide dioxygenase ETHE1, mitochondrial OS=Homo sapiens OX=9606 GN=ETHE1 PE=1 SV=1	ETHE1	16.6	20.4	22.9	13.8	13.9	18.7	17.2	23	19.6	18.8
Cohesin subunit SA-2 OS=Homo sapiens OX=9606 GN=STAG2 PE=1 SV=3	STAG2	621.3	902.3	728.8	954.2	825.8	777.1	873.2	840.6	790.5	742.4
T-complex protein 1 subunit gamma OS=Homo sapiens OX=9606 GN=CCT3 PE=1 SV=4	CCT3	16839.8	21834.3	19240.2	23724.7	19471.7	19889.9	21610.6	21018.1	20289.9	19523.9
Basigin OS=Homo sapiens OX=9606 GN=BSG PE=1 SV=2	BSG	2762.9	3784.3	3600.6	3304.7	3373.5	3318.1	3659.1	3200.8	3636.5	3447.6
Uncharacterized protein OS=Homo sapiens OX=9606 PE=1 SV=2	1	18	27.3	25.5	30.7	23.8	30.7	27.4	25.6	22.3	19.1
Signal transducing adapter molecule 1 OS=Homo sapiens OX=9606 GN=STAM PE=1 SV=3	STAM	361	480.4	418	483.3	375.5	448.5	423.5	414.7	454.6	424.2
Testis-expressed protein 10 OS=Homo sapiens OX=9606 GN=TEX10 PE=1 SV=2	TEX10	207.4	364.4	281.7	363	372.5	245	362.5	374.4	298.3	329.4
Eukaryotic translation initiation factor 3 subunit B OS=Homo sapiens OX=9606 GN=EIF3B PE=1 SV=3	EIF3B	5212.8	6581.9	5916.8	6971.1	5902.6	6158.5	6921.2	6533.6	6352.5	5910.8
T-complex protein 1 subunit eta OS=Homo sapiens OX=9606 GN=CCT7 PE=1 SV=2	CCT7	20440.3	26090.5	23314.1	27946.9	21433.9	24872.1	24414.9	24189.5	23835.9	23181.5
Mitogen-activated protein kinase kinase kinase 7 OS=Homo sapiens OX=9606 GN=MAP3K7 PE=1 SV=1	MAP3K7	151.6	192.7	188.3	208	174.3	182.2	192.2	189.1	175.1	164.5
ATP-dependent RNA helicase DDX54 OS=Homo sapiens OX=9606 GN=DDX54 PE=1 SV=2	DDX54	135.3	265.7	165.9	236.8	271.5	155.1	293.5	295.2	222.8	234.3
NADH dehydrogenase [ubiquinone] 1 beta subcomplex subunit 11, mitochondrial OS=Homo sapiens OX=9606 GN=NDUFB11 PE=1 SV=1	NDUFB11	304.1	499	438.2	358.9	435.5	378.1	482.1	420.8	477.4	430.2
Splicing factor 45 OS=Homo sapiens OX=9606 GN=RBM17 PE=1 SV=1	RBM17	1502.2	2103.1	1861.1	2070.5	1771.2	1866.3	1890	1955.8	1844.8	1913.3
Nucleolar protein 14 OS=Homo sapiens OX=9606 GN=NOP14 PE=1 SV=3	NOP14	360.1	645	449.8	624.6	663.4	423.2	747.7	729.3	586.8	650
28S ribosomal protein S36, mitochondrial OS=Homo sapiens OX=9606 GN=MRPS36 PE=1 SV=2	MRPS36	188.5	281.1	300.5	240.7	201.8	222.5	184.6	228.2	266.2	332.6
Uncharacterized protein C3orf38 OS=Homo sapiens OX=9606 GN=C3orf38 PE=1 SV=1	C3orf38	32.6	41.5	37.8	50.5	31.9	38.5	38.7	38.7	44.4	34.6
26S proteasome regulatory subunit 10B OS=Homo sapiens OX=9606 GN=PSMC6 PE=1 SV=1	PSMC6	7656.7	8983.2	8968.4	9381.6	7574.7	9034.8	8875.2	8375.6	8927.9	8043
Protein numb homolog OS=Homo sapiens OX=9606 GN=NUMB PE=1 SV=2	NUMB	325.3	433.7	422.6	423.7	395.4	452.3	416	423.9	471	415.3
Non-histone chromosomal protein HMG-17 OS=Homo sapiens OX=9606 GN=HMGN2 PE=1 SV=3	HMGN2	548.1	712	617.3	699.6	653.8	545.1	721.9	644.8	657.5	659.5
Eukaryotic translation initiation factor 4B OS=Homo sapiens OX=9606 GN=EIF4B PE=1 SV=1	EIF4B	5759.8	6575.9	6404.5	7241.8	5579.8	6798.4	6465.6	6101	6339	6284.4
60S ribosomal protein L38 OS=Homo sapiens OX=9606 GN=RPL38 PE=1 SV=2	RPL38	1258.7	1726.5	1444	1687.3	1470.2	1401.8	1853.7	1710.9	1571.6	1585.6
Histidine triad nucleotide-binding protein 1 OS=Homo sapiens OX=9606 GN=HINT1 PE=1 SV=2	HINT1	703.4	895.2	1179.9	763	632.3	829.2	810.3	827.2	1054.4	993.7
Kinesin-like protein KIF15 OS=Homo sapiens OX=9606 GN=KIF15 PE=1 SV=1	KIF15	120.7	139.3	129.7	148.6	121.9	145.9	134.6	130	138.1	123.9
Proteasome subunit beta type-2 OS=Homo sapiens OX=9606 GN=PSMB2 PE=1 SV=1	PSMB2	604.1	775.4	677.8	848.1	676.6	712.6	784.3	743.8	686.4	677
DNA-directed RNA polymerase II subunit RPB1 OS=Homo sapiens OX=9606 GN=POLR2A PE=1 SV=2	POLR2A	930.8	1197.4	1064.8	1246.3	1169.7	1098.2	1246.3	1201	1143.4	1159.9
Rab GDP dissociation inhibitor beta OS=Homo sapiens OX=9606 GN=GDI2 PE=1 SV=2	GDI2	4283.9	4919	4630.4	5630.5	4119.1	4943.5	4997.7	4641.1	4702.7	4487.2
Nucleoredoxin OS=Homo sapiens OX=9606 GN=NXN PE=1 SV=2	NXN	207.7	245.9	219.4	255	201.9	230.7	236	227.5	254.1	217.8
RNA-binding protein EWS OS=Homo sapiens OX=9606 GN=EWSR1 PE=1 SV=1	EWSR1	1752.8	2103.9	2000.3	2239.1	1718.8	2133.8	2030.1	1906.1	2048.4	1918.9
Isoleucine--tRNA ligase, mitochondrial OS=Homo sapiens OX=9606 GN=IARS2 PE=1 SV=2	IARS2	1718.5	2459.3	2063.8	2487.2	2364.1	2145.4	2374	2322.1	1995	2026.4
Far upstream element-binding protein 2 OS=Homo sapiens OX=9606 GN=KHSRP PE=1 SV=4	KHSRP	6680	7960.4	7916.7	8482.8	6733.4	8281.2	7679.2	7615.9	7954.1	7850.6
Serine/threonine-protein kinase VRK1 OS=Homo sapiens OX=9606 GN=VRK1 PE=1 SV=1	VRK1	825.7	1373.5	1049.5	1303.3	1223.5	972.9	1511.8	1425.3	1213.8	1262.7
Cyclin-K OS=Homo sapiens OX=9606 GN=CCNK PE=1 SV=2	CCNK	102.8	133.3	115	135.7	113.6	123.8	122.8	131.3	117.7	122.4
Ribonuclease P protein subunit p30 (Fragment) OS=Homo sapiens OX=9606 GN=RPP30 PE=1 SV=1	RPP30	288.1	398.5	340.4	421.9	395.3	339.4	390.1	408.1	364.1	376.4
Eukaryotic translation initiation factor 1A, X-chromosomal OS=Homo sapiens OX=9606 GN=EIF1AX PE=1 SV=2	EIF1AX	2212.5	2865.4	2480.9	2696	2373.9	2255.7	2763.8	2520	2552.3	2536.9
Actin-related protein 2/3 complex subunit 2 OS=Homo sapiens OX=9606 GN=ARPC2 PE=1 SV=1	ARPC2	851.7	1284.1	967.5	1262.1	1121.4	1003.8	1259.6	1236.6	1026.4	1125.5
U4/U6 small nuclear ribonucleoprotein Prp3 OS=Homo sapiens OX=9606 GN=PRPF3 PE=1 SV=2	PRPF3	87.8	126.6	114	141.1	126.3	99.3	133.9	125.8	129.1	136.1
Cytochrome c1, heme protein, mitochondrial OS=Homo sapiens OX=9606 GN=CYC1 PE=1 SV=3	CYC1	829.8	1185.6	1092.2	783.3	995.8	874.7	1143.5	1003.1	1094	1110.5
DNA ligase 3 OS=Homo sapiens OX=9606 GN=LIG3 PE=1 SV=2	LIG3	237	368	267.8	356.8	326	258.8	365.5	347.9	285.8	351.3
Coiled-coil and C2 domain-containing protein 1B OS=Homo sapiens OX=9606 GN=CC2D1B PE=1 SV=1	CC2D1B	20.4	22.6	20.7	23	21.7	22.4	21.8	21.7	23.9	20.1
Ataxin-2 OS=Homo sapiens OX=9606 GN=ATXN2 PE=1 SV=1	ATXN2	686.6	890.2	786	951.1	748.4	808.9	833.7	812.8	846.8	851.2
Endonuclease III-like protein 1 OS=Homo sapiens OX=9606 GN=NTHL1 PE=1 SV=2	NTHL1	142.1	211.4	163.1	196.1	198.5	167.4	216.7	218.3	172.1	206.6
Leucine zipper transcription factor-like protein 1 OS=Homo sapiens OX=9606 GN=LZTFL1 PE=1 SV=1	LZTFL1	412.3	482.7	495.4	480.6	364.9	460.2	465.7	452.4	480.5	472.7
Coatomer subunit zeta-1 OS=Homo sapiens OX=9606 GN=COPZ1 PE=1 SV=1	COPZ1	573.5	823.2	662.9	887.9	642.6	709.5	754.9	711.1	678.9	692
Exportin-T OS=Homo sapiens OX=9606 GN=XPOT PE=1 SV=2	XPOT	1373	1779.7	1576	1887.1	1515.2	1615.7	1803	1690.1	1685.6	1539.4
Golgi resident protein GCP60 OS=Homo sapiens OX=9606 GN=ACBD3 PE=1 SV=4	ACBD3	391.3	460.6	451.9	503.7	384.8	450.9	449.3	444.2	472.1	433.4
Phosphoenolpyruvate carboxykinase [GTP], mitochondrial OS=Homo sapiens OX=9606 GN=PCK2 PE=1 SV=4	PCK2	274.2	363.5	327.8	353.7	343.1	325.3	344.4	376.3	331.4	340.8
TRMT1-like protein OS=Homo sapiens OX=9606 GN=TRMT1L PE=1 SV=2	TRMT1L	9	16.6	10.4	12.8	11	12.1	14.6	11.7	12	9.8
Telomere length and silencing protein 1 homolog OS=Homo sapiens OX=9606 GN=C9orf78 PE=1 SV=1	C9orf78	1368	1453.2	1560.8	1621.8	1320.7	1539.6	1524.4	1340.4	1560.5	1421.9
DNA excision repair protein ERCC-6-like OS=Homo sapiens OX=9606 GN=ERCC6L PE=1 SV=1	ERCC6L	294.6	341.1	312.7	387.5	304.3	346.6	377.6	332.1	355.3	317.2
Echinoderm microtubule-associated protein-like 4 OS=Homo sapiens OX=9606 GN=EML4 PE=1 SV=3	EML4	333.2	455.6	394.5	482.7	377.9	398.3	439.1	439.4	419.7	397.5
N-alpha-acetyltransferase 40 OS=Homo sapiens OX=9606 GN=NAA40 PE=1 SV=1	NAA40	181.4	266.9	208.3	244.9	220.5	169.2	228.6	233	229.5	251
Enoyl-CoA delta isomerase 1, mitochondrial OS=Homo sapiens OX=9606 GN=ECI1 PE=1 SV=1	ECI1	1274.5	1774.6	1582.8	1745.9	1568.8	1704.1	1695.5	1844.4	1636.4	1680.2
Uncharacterized protein (Fragment) OS=Homo sapiens OX=9606 PE=1 SV=1	1	1304.2	1732.2	1602.7	1768.1	1381.4	1631.7	1564.1	1554.7	1654.8	1550
Caldesmon OS=Homo sapiens OX=9606 GN=CALD1 PE=1 SV=1	CALD1	2298.9	2707.5	2664.8	2936	2395.4	2830.7	2667.8	2508.4	2724.2	2578
ATP-dependent 6-phosphofructokinase, liver type OS=Homo sapiens OX=9606 GN=PFKL PE=1 SV=6	PFKL	477.4	601.4	510.3	657.6	555.2	561.5	661.5	616.4	593.7	568.5
EF-hand domain-containing protein D2 OS=Homo sapiens OX=9606 GN=EFHD2 PE=1 SV=1	EFHD2	589.1	686.5	689.7	719	587.6	692.8	654.8	635.4	698.3	665.7
AP-1 complex subunit beta-1 OS=Homo sapiens OX=9606 GN=AP1B1 PE=1 SV=2	AP1B1	935.8	1021.7	1111.8	1246.3	1010.4	1121.4	1144.3	1110.8	1142.1	1079.2
Retinoblastoma-binding protein 5 OS=Homo sapiens OX=9606 GN=RBBP5 PE=1 SV=2	RBBP5	183.6	243.8	218	261.3	210.4	248.7	244.1	212.7	220.3	226.4
Golgi phosphoprotein 3-like OS=Homo sapiens OX=9606 GN=GOLPH3L PE=1 SV=1	GOLPH3L	47.5	74.6	59	68.8	56.6	56.6	71.2	72	64.4	52.7
Guanine nucleotide-binding protein G(I)/G(S)/G(T) subunit beta-2 OS=Homo sapiens OX=9606 GN=GNB2 PE=1 SV=3	GNB2	282.5	392.8	370.1	378.9	344.2	352.6	373.1	369.7	383.2	364.6
DNA repair protein XRCC1 OS=Homo sapiens OX=9606 GN=XRCC1 PE=1 SV=2	XRCC1	123.6	161.5	145	167	153.7	161.4	162.4	144.8	152.2	141.4
39S ribosomal protein L39, mitochondrial (Fragment) OS=Homo sapiens OX=9606 GN=MRPL39 PE=1 SV=1	MRPL39	1167.3	1543.5	1410.3	1561.6	1368.5	1441.3	1468.3	1416.7	1462.5	1389
Cleft lip and palate transmembrane protein 1-like protein OS=Homo sapiens OX=9606 GN=CLPTM1L PE=1 SV=1	CLPTM1L	68.4	90.8	70.2	76.6	80.6	70	87.4	80.3	101.3	74.4
Molybdopterin synthase catalytic subunit OS=Homo sapiens OX=9606 GN=MOCS2 PE=1 SV=1	MOCS2	94.2	113.8	100.7	112.1	80	110.8	105.4	107	90	98.7
Ubiquitin thioesterase OS=Homo sapiens OX=9606 GN=OTUB1 PE=1 SV=2	OTUB1	5451.2	6286.1	5926.4	7015.6	5339.5	5957	6108	5943.9	5936.1	5742.5
Medium-chain specific acyl-CoA dehydrogenase, mitochondrial OS=Homo sapiens OX=9606 GN=ACADM PE=1 SV=1	ACADM	481.8	572.9	617.1	591.6	522.3	572.1	551.5	552.7	575.9	516.7
Bromodomain-containing protein 8 OS=Homo sapiens OX=9606 GN=BRD8 PE=1 SV=2	BRD8	63.1	75.1	68.3	88.9	76.1	73.7	68.3	74.6	88	81.9
ASNSD1 upstream open reading frame protein OS=Homo sapiens OX=9606 GN=ASDURF PE=1 SV=1	ASDURF	143.6	195	163.2	206.4	160.5	180.7	175	184.6	168.6	172.6
Mitogen-activated protein kinase OS=Homo sapiens OX=9606 GN=MAPK14 PE=1 SV=1	MAPK14	209.1	282.9	233.3	294.6	239.9	240.1	276	246.2	254.7	258
Probable serine carboxypeptidase CPVL (Fragment) OS=Homo sapiens OX=9606 GN=CPVL PE=1 SV=1	CPVL	44.7	63.9	52.8	59.5	61.1	67.7	61.5	60.8	53	47.9
Polypyrimidine tract-binding protein 1 OS=Homo sapiens OX=9606 GN=PTBP1 PE=1 SV=1	PTBP1	8515.7	10963.3	10806.1	11879.1	10923.6	10002	11184.8	10903.8	10688	10276.2
Ubiquitin carboxyl-terminal hydrolase 7 OS=Homo sapiens OX=9606 GN=USP7 PE=1 SV=2	USP7	3552.7	4831.7	4245.7	5091.8	3985.1	4176.3	4644.4	4245.2	4451.6	3939.6
Protein unc-119 homolog A OS=Homo sapiens OX=9606 GN=UNC119 PE=1 SV=1	UNC119	78.9	77.5	80.9	92.7	75.8	80.5	81.7	82.4	81	81.5
Glia maturation factor beta (Fragment) OS=Homo sapiens OX=9606 GN=GMFB PE=1 SV=1	GMFB	223.5	257.1	255	166.8	152.9	242.7	247.2	244.4	254.7	260.2
T-complex protein 1 subunit delta OS=Homo sapiens OX=9606 GN=CCT4 PE=1 SV=4	CCT4	19042.7	22046.3	21805.3	24994.3	19505.5	23306.8	23412.3	21759.4	22858.5	20751.1
Ragulator complex protein LAMTOR3 OS=Homo sapiens OX=9606 GN=LAMTOR3 PE=1 SV=1	LAMTOR3	31.9	45.1	44.1	52.7	48.6	47.9	49.1	44	47.8	42.6
Telomerase Cajal body protein 1 OS=Homo sapiens OX=9606 GN=WRAP53 PE=1 SV=1	WRAP53	37	39.3	40.7	48.2	35.8	47.1	35.5	40.6	40.6	44.9
Serine/arginine-rich splicing factor 7 OS=Homo sapiens OX=9606 GN=SRSF7 PE=1 SV=1	SRSF7	1449.9	2018.9	1965.3	1676.3	1426.5	1703.9	1548.5	1596	1810.1	1710.9
RNA polymerase II subunit A C-terminal domain phosphatase (Fragment) OS=Homo sapiens OX=9606 GN=CTDP1 PE=1 SV=1	CTDP1	138.5	189	155.1	202	155.2	174.8	181.7	183.9	164.1	166
Proteasome subunit alpha type-2 OS=Homo sapiens OX=9606 GN=PSMA2 PE=1 SV=2	PSMA2	2493.2	2750.4	3005.2	3185.7	2690.9	2787.9	3069.6	2964	3135.7	2890.8
Heterogeneous nuclear ribonucleoprotein A/B OS=Homo sapiens OX=9606 GN=HNRNPAB PE=1 SV=1	HNRNPAB	6681.6	9135.5	8815.4	8061.5	7185	7870.7	7374.4	7610.2	7794	7724.4
Death domain-associated protein 6 OS=Homo sapiens OX=9606 GN=DAXX PE=1 SV=2	DAXX	37.4	43.6	39.3	49.5	39.2	43.9	42.5	44	40.3	40.5
DNA primase large subunit OS=Homo sapiens OX=9606 GN=PRIM2 PE=1 SV=1	PRIM2	397.1	599.1	476.4	614.1	530.6	465.8	577.4	581	527.1	539.6
Inosine-5'-monophosphate dehydrogenase (Fragment) OS=Homo sapiens OX=9606 GN=IMPDH1 PE=1 SV=1	IMPDH1	31	49	44.5	42.7	34	44.7	39.3	39.1	39.9	40
Spliceosome RNA helicase DDX39B OS=Homo sapiens OX=9606 GN=DDX39B PE=1 SV=1	DDX39B	4205.6	5466.5	5201.3	5759.3	4919.7	5059.6	5677.3	5186.5	5111	4699.6
Uracil-DNA glycosylase OS=Homo sapiens OX=9606 GN=UNG PE=1 SV=1	UNG	151.9	164.1	159.8	194.7	147.7	171.7	196.5	175.8	180.2	158.6
Endophilin-B1 OS=Homo sapiens OX=9606 GN=SH3GLB1 PE=1 SV=1	SH3GLB1	799.3	1027.5	984.7	992.4	777.6	938.2	898.4	834.1	961.7	847.3
Thimet oligopeptidase OS=Homo sapiens OX=9606 GN=THOP1 PE=1 SV=2	THOP1	1961.8	2317.7	2147.4	2524.8	1917.8	2302.4	2347.3	2166.4	2294.1	2013.3
DNA mismatch repair protein Msh3 OS=Homo sapiens OX=9606 GN=MSH3 PE=1 SV=1	MSH3	48.4	82.5	59.5	73	68.5	53.2	88.9	91.4	68.2	71.2
Jupiter microtubule associated homolog 1 OS=Homo sapiens OX=9606 GN=JPT1 PE=1 SV=3	JPT1	812.9	1071.7	1029.6	1146.7	851.1	979.5	986.8	934.4	1071.6	945.4
DNA mismatch repair protein Msh2 OS=Homo sapiens OX=9606 GN=MSH2 PE=1 SV=1	MSH2	3235.2	3680.7	3572.8	4130.5	3219.2	3719.5	3789.2	3563.3	3626.5	3479.1
Protein SEC13 homolog OS=Homo sapiens OX=9606 GN=SEC13 PE=1 SV=3	SEC13	1212.9	1475.4	1380.1	1633.5	1300.6	1434.7	1495.8	1353.8	1524.5	1362.1
Myc-associated zinc finger protein OS=Homo sapiens OX=9606 GN=MAZ PE=1 SV=1	MAZ	106.7	175.4	130.7	98.1	133.6	103	150.8	144.8	142.1	143.3
Mitochondrial 2-oxoglutarate/malate carrier protein OS=Homo sapiens OX=9606 GN=SLC25A11 PE=1 SV=3	SLC25A11	409.1	552.1	546.1	397.8	524.5	431.2	567.7	514.5	559.6	562.7
Eukaryotic translation initiation factor 3 subunit C OS=Homo sapiens OX=9606 GN=EIF3C PE=1 SV=1	EIF3C	6923	9581.4	7690.1	9791.3	8194.6	8115.3	9603	9209.6	8537.1	8456.9
60S ribosomal protein L26 OS=Homo sapiens OX=9606 GN=RPL26 PE=1 SV=1	RPL26	280.6	408.6	273.8	435.9	407.1	323	526.5	518.7	406.8	414.9
60S ribosomal protein L23a OS=Homo sapiens OX=9606 GN=RPL23A PE=1 SV=1	RPL23A	6956.1	10817.7	7642.1	9926.6	10683.3	6771.1	12211.5	11060.4	9263.6	10042.2
Cytochrome b-c1 complex subunit 1, mitochondrial OS=Homo sapiens OX=9606 GN=UQCRC1 PE=1 SV=3	UQCRC1	2804.3	3278.2	3674.9	3360.5	3143.1	3292.6	3147.2	3120.9	3321.6	3120.2
Signal recognition particle receptor subunit beta OS=Homo sapiens OX=9606 GN=SRPRB PE=1 SV=3	SRPRB	537.2	964.2	716.4	633.9	774.2	629.6	839	801.8	763.2	809.9
ATP-dependent RNA helicase DDX42 OS=Homo sapiens OX=9606 GN=DDX42 PE=1 SV=1	DDX42	900.9	1383.5	1035.5	1269.3	1208.7	943.9	1345.4	1258.8	1185.3	1207.9
Heterogeneous nuclear ribonucleoprotein A0 OS=Homo sapiens OX=9606 GN=HNRNPA0 PE=1 SV=1	HNRNPA0	1540.3	2233.8	2384.6	1913.4	1823.3	1805.7	1754	1996.8	2084.1	2185.6
60S ribosomal protein L31 OS=Homo sapiens OX=9606 GN=RPL31 PE=1 SV=1	RPL31	1257.1	2098.6	1487.7	1841.5	1871.2	1307.9	2173.3	2085.4	1717.4	1865.2
MKI67 FHA domain-interacting nucleolar phosphoprotein OS=Homo sapiens OX=9606 GN=NIFK PE=1 SV=1	NIFK	250.6	469.3	301.9	475.6	470.3	293.6	480.5	441.9	366	366.9
COMM domain-containing protein 9 OS=Homo sapiens OX=9606 GN=COMMD9 PE=1 SV=2	COMMD9	473.3	532	640.8	508.7	462	501.8	510.1	505	593.3	527.3
KRR1 small subunit processome component homolog OS=Homo sapiens OX=9606 GN=KRR1 PE=1 SV=4	KRR1	774.7	1268	937.6	1257.7	1203	907.1	1353.6	1293.1	1063.9	1088.8
Proteasome subunit alpha type-7 OS=Homo sapiens OX=9606 GN=PSMA7 PE=1 SV=1	PSMA7	5045.5	6521.3	5627.5	6918.9	5238.6	5957	6068.4	5812	5846.8	5614.8
Abasic site processing protein HMCES OS=Homo sapiens OX=9606 GN=HMCES PE=1 SV=1	HMCES	35.1	47.1	39.6	49.6	36.6	41.1	48.5	42.1	43.3	37.7
Cytosolic non-specific dipeptidase OS=Homo sapiens OX=9606 GN=CNDP2 PE=1 SV=2	CNDP2	415.5	497.9	441.1	564.4	410.5	434.2	504	444.9	485.8	440
Myelin expression factor 2 OS=Homo sapiens OX=9606 GN=MYEF2 PE=1 SV=1	MYEF2	233.9	262.6	299.7	299.2	260.9	273.9	281.4	232.2	291.9	251.1
Translation initiation factor eIF-2B subunit alpha OS=Homo sapiens OX=9606 GN=EIF2B1 PE=1 SV=1	EIF2B1	3067.3	3996	3544.7	4062.2	3388	3450.6	4022	3620.8	3783.7	3327.3
Serine/threonine-protein kinase 26 OS=Homo sapiens OX=9606 GN=STK26 PE=1 SV=1	STK26	98.8	133.9	126.4	138.4	110.4	134.1	117	125.6	118.7	123.5
Nucleoporin Nup43 OS=Homo sapiens OX=9606 GN=NUP43 PE=1 SV=1	NUP43	123.2	141.1	135.1	121.7	116.6	119.7	135.1	123	133.3	131
GTP-binding protein SAR1b OS=Homo sapiens OX=9606 GN=SAR1B PE=1 SV=1	SAR1B	597.1	813	662.2	774.9	610.3	698.4	724.7	686.4	672.5	682
RNA-binding protein 12 OS=Homo sapiens OX=9606 GN=RBM12 PE=1 SV=1	RBM12	1536.9	1913.8	1840.6	1743.8	1373.1	1798.5	1632.2	1630.2	1716.8	1669.5
Phosphoglycerate mutase 1 OS=Homo sapiens OX=9606 GN=PGAM1 PE=1 SV=2	PGAM1	13202.4	15250.4	14754.2	15305.8	12593.6	14647	14914.8	14185.2	14255.2	13771.2
SLC35A4 upstream open reading frame protein OS=Homo sapiens OX=9606 GN=SLC35A4 PE=3 SV=1	SLC35A4	54.7	80.2	72.1	58	59.4	63.7	80.7	71.7	80.8	59.5
Carnitine O-palmitoyltransferase 2, mitochondrial OS=Homo sapiens OX=9606 GN=CPT2 PE=1 SV=2	CPT2	557.6	774.6	702	793.8	784.8	684.1	739.8	780.7	739.2	714.7
Protein mago nashi homolog OS=Homo sapiens OX=9606 GN=MAGOH PE=1 SV=1	MAGOH	2420.4	3001.6	2779.3	3188.8	2880.2	2814.4	3070.1	3049.9	2970.4	2993.3
Receptor expression-enhancing protein 4 OS=Homo sapiens OX=9606 GN=REEP4 PE=1 SV=1	REEP4	40.5	50.3	57.9	40.1	59.8	47.4	67.7	51.8	67	54.6
Immunoglobulin-binding protein 1 OS=Homo sapiens OX=9606 GN=IGBP1 PE=1 SV=1	IGBP1	554.2	668.2	637.5	684.9	540.4	648.6	653.2	631.7	641.7	553.9
Angio-associated migratory cell protein OS=Homo sapiens OX=9606 GN=AAMP PE=1 SV=1	AAMP	1429.9	1628.2	1613.7	1739.6	1355.3	1657.1	1677	1503.4	1619.9	1462.8
Leucine-rich repeat-containing protein 40 OS=Homo sapiens OX=9606 GN=LRRC40 PE=1 SV=1	LRRC40	895.1	1105	1031.2	1205.6	910	1018.3	1095.7	1023.9	1089.8	980.9
Cytochrome c oxidase subunit 4 isoform 1, mitochondrial OS=Homo sapiens OX=9606 GN=COX4I1 PE=1 SV=1	COX4I1	3032.1	4610.5	4004.3	3121.7	3900.5	3530.3	4412.8	3818.4	4167.7	4228.6
Thymocyte nuclear protein 1 OS=Homo sapiens OX=9606 GN=THYN1 PE=1 SV=1	THYN1	345.6	499.2	497.7	360	334.9	403.9	420.2	435.6	474.6	559.4
Alpha-synuclein OS=Homo sapiens OX=9606 GN=SNCA PE=1 SV=1	SNCA	192	229.5	227.3	265.3	179.8	239.9	219.7	202.6	226.9	211.4
Na(+)/H(+) exchange regulatory cofactor NHE-RF1 OS=Homo sapiens OX=9606 GN=SLC9A3R1 PE=1 SV=4	SLC9A3R1	1479.7	1931.8	1781.1	2043.5	1503.9	1872.6	1806.5	1769.5	1832.1	1813.5
Ras-associated and pleckstrin homology domains-containing protein 1 OS=Homo sapiens OX=9606 GN=RAPH1 PE=1 SV=1	RAPH1	12.9	18.7	20	20.7	11.6	15.8	17.9	16.7	18.5	14.8
40S ribosomal protein S10 OS=Homo sapiens OX=9606 GN=RPS10 PE=1 SV=1	RPS10	6497.5	9137.9	7283.7	8910.5	8253.8	7001	10277.1	9364.1	8290.7	7902.8
2-hydroxyacyl-CoA lyase 1 OS=Homo sapiens OX=9606 GN=HACL1 PE=1 SV=2	HACL1	177.2	204.4	194.9	239.7	187.7	217.4	220.6	193.6	194.4	178.1
GMP synthase [glutamine-hydrolyzing] OS=Homo sapiens OX=9606 GN=GMPS PE=1 SV=1	GMPS	3919.7	4477.5	4476.2	4941.2	3769.1	4454.9	4420.3	4228.7	4600	4227.8
CCR4-NOT transcription complex subunit 7 OS=Homo sapiens OX=9606 GN=CNOT7 PE=1 SV=3	CNOT7	55.4	65.8	68	67.8	59.5	53.7	69.5	65.9	68.1	63.6
Muskelin OS=Homo sapiens OX=9606 GN=MKLN1 PE=1 SV=1	MKLN1	19.3	24.7	18.8	24.8	19.9	22	23.6	19.1	20.9	22.7
3-hydroxyisobutyryl-CoA hydrolase, mitochondrial (Fragment) OS=Homo sapiens OX=9606 GN=HIBCH PE=1 SV=1	HIBCH	11.6	19.5	16.7	16.6	16	19.5	18.4	16.5	18.7	17.1
Zinc finger CCHC domain-containing protein 8 OS=Homo sapiens OX=9606 GN=ZCCHC8 PE=1 SV=2	ZCCHC8	302	397.8	371.9	426.9	336.3	398.5	352	369	381	371.1
Nascent polypeptide-associated complex subunit alpha OS=Homo sapiens OX=9606 GN=NACA PE=1 SV=2	NACA	2142.9	2638.5	2509.1	2756.8	2097	2684.2	2700.6	2417.9	2564	2203.9
Heterogeneous nuclear ribonucleoprotein A3 OS=Homo sapiens OX=9606 GN=HNRNPA3 PE=1 SV=2	HNRNPA3	4390.5	6197.2	6393.8	5768.4	4920.1	5129.6	4710.1	5113.9	5540.6	5646.1
AT-rich interactive domain-containing protein 4B (Fragment) OS=Homo sapiens OX=9606 GN=ARID4B PE=1 SV=1	ARID4B	10.1	9.1	10.9	11.1	9.5	10.3	8.7	11.5	11	9.1
Centrosomal protein of 170 kDa OS=Homo sapiens OX=9606 GN=CEP170 PE=1 SV=1	CEP170	285	465.9	334.5	427.8	313.7	333.5	338.6	352.9	326.4	335.1
ATP-binding cassette sub-family E member 1 OS=Homo sapiens OX=9606 GN=ABCE1 PE=1 SV=1	ABCE1	4062.8	5809.3	4424.4	5770.2	5068.8	4739.8	6337.4	5776.3	5317.5	5172.6
Cell division cycle and apoptosis regulator protein 1 OS=Homo sapiens OX=9606 GN=CCAR1 PE=1 SV=2	CCAR1	2374.4	3172	2808.4	3446.3	2743.6	3072	3027.9	2996.5	2846.1	2721
Mediator of RNA polymerase II transcription subunit 8 OS=Homo sapiens OX=9606 GN=MED8 PE=1 SV=2	MED8	34.7	46.4	56.1	49	37.7	40.5	40	39.3	45.9	40.6
Nucleoporin NUP35 OS=Homo sapiens OX=9606 GN=NUP35 PE=1 SV=1	NUP35	424.8	516.2	534.8	546.4	484.7	495.6	520.8	480	541.7	456.7
Cytosolic acyl coenzyme A thioester hydrolase OS=Homo sapiens OX=9606 GN=ACOT7 PE=1 SV=3	ACOT7	2058.2	2390.1	2281.3	2593.9	1987.4	2400.7	2354.9	2226	2283.1	2163.6
Flotillin-2 OS=Homo sapiens OX=9606 GN=FLOT2 PE=1 SV=2	FLOT2	1141.3	1654.9	1404.4	1459.6	1349.2	1385.2	1402.3	1426.3	1355.8	1415.3
Ubiquitin carboxyl-terminal hydrolase MINDY-3 OS=Homo sapiens OX=9606 GN=MINDY3 PE=1 SV=1	MINDY3	104	112.9	114	120.6	96.6	121.3	117	99.8	119.5	101.7
Double-stranded RNA-binding protein Staufen homolog 1 OS=Homo sapiens OX=9606 GN=STAU1 PE=1 SV=2	STAU1	909.1	1403.1	1294.4	1203.6	1056.5	1060.2	1275.9	1266.7	1381	1356.9
DNA polymerase OS=Homo sapiens OX=9606 GN=POLA1 PE=1 SV=1	POLA1	136.5	202.8	150	196.8	172	145.3	193.6	178.3	160.7	187.5
Dynamin-like 120 kDa protein, mitochondrial OS=Homo sapiens OX=9606 GN=OPA1 PE=1 SV=3	OPA1	367	493.5	456.9	504.2	447	433.4	471.3	495.3	439.3	460.2
S-adenosylhomocysteine hydrolase-like protein 1 OS=Homo sapiens OX=9606 GN=AHCYL1 PE=1 SV=2	AHCYL1	969.4	1102.6	1089.3	1230.8	978.7	1163.4	1255.8	1078.7	1133.7	1044.2
Nucleolar protein 58 OS=Homo sapiens OX=9606 GN=NOP58 PE=1 SV=1	NOP58	2032.2	3757.2	2470.8	3424.5	3871.9	2254.3	4140.3	3980.2	3179.8	3451.3
Neutral amino acid transporter B(0) OS=Homo sapiens OX=9606 GN=SLC1A5 PE=1 SV=2	SLC1A5	619.6	877.3	800	688.9	749.7	723	825.2	758.4	818.7	822.4
RNA-binding protein 26 OS=Homo sapiens OX=9606 GN=RBM26 PE=1 SV=1	RBM26	1095.2	1544.6	1274.1	1458.2	1233.4	1195.3	1458.8	1404.6	1354.3	1362
Mitochondrial antiviral-signaling protein OS=Homo sapiens OX=9606 GN=MAVS PE=1 SV=2	MAVS	248.2	290.8	304	266.2	264.3	269.5	277.8	267.1	277.5	282.1
Guanine nucleotide-binding protein G(i) subunit alpha-2 OS=Homo sapiens OX=9606 GN=GNAI2 PE=1 SV=3	GNAI2	563.9	805.8	745.4	688.1	673.5	663.8	769.3	677.7	762.2	708.3
Phosphoinositide phospholipase C OS=Homo sapiens OX=9606 GN=PLCH1 PE=1 SV=1	PLCH1	353.5	449.3	449.6	546.9	428.3	486.9	407	456.4	382.2	456.5
TBC1 domain family member 15 (Fragment) OS=Homo sapiens OX=9606 GN=TBC1D15 PE=1 SV=1	TBC1D15	87.5	92.8	100.3	104.6	92.2	102	110.1	92.1	101.5	90.5
Exopolyphosphatase PRUNE1 OS=Homo sapiens OX=9606 GN=PRUNE1 PE=1 SV=1	PRUNE1	66.5	85.8	80.4	84.9	80.7	84.5	83.1	66.6	78.8	77.7
Eukaryotic translation initiation factor 3 subunit E OS=Homo sapiens OX=9606 GN=EIF3E PE=1 SV=1	EIF3E	2417.9	3042.8	2684	3108.7	2632.9	2755.5	3098.1	2917.3	2884.8	2640.7
Eukaryotic translation initiation factor 2 subunit 2 OS=Homo sapiens OX=9606 GN=EIF2S2 PE=1 SV=2	EIF2S2	1216.8	1661.5	1345	1635.2	1499.5	1347	1876.2	1686.1	1517.6	1461.2
Synapse-associated protein 1 OS=Homo sapiens OX=9606 GN=SYAP1 PE=1 SV=1	SYAP1	3589.6	4171.9	4124.6	4377.9	3320.8	4192.4	3980.2	3711.9	3949.2	3748
Mannose-1-phosphate guanyltransferase alpha OS=Homo sapiens OX=9606 GN=GMPPA PE=1 SV=1	GMPPA	32.2	41.2	33	48.5	37.8	37.8	35.6	43.7	41.4	40.3
ATPase inhibitor, mitochondrial OS=Homo sapiens OX=9606 GN=ATP5IF1 PE=1 SV=1	ATP5IF1	1106.1	1126.4	1359.2	1209	1189.9	1288.6	1405.1	1233.1	1413.2	1247
ADP-ribosylation factor 3 OS=Homo sapiens OX=9606 GN=ARF3 PE=1 SV=2	ARF3	2298.4	2820.3	2635.7	2857.1	2210.6	2712.8	2777.6	2488.6	2650.3	2260.5
SOSS complex subunit C OS=Homo sapiens OX=9606 GN=INIP PE=1 SV=1	INIP	112.9	123.3	125.2	120.5	118.8	103.1	143	124	153.8	116.4
GRIP and coiled-coil domain-containing protein 2 OS=Homo sapiens OX=9606 GN=GCC2 PE=1 SV=4	GCC2	46.5	55	60.7	57.4	56.3	54.2	56.9	48.1	55.7	48.6
Ubiquitin carboxyl-terminal hydrolase 14 OS=Homo sapiens OX=9606 GN=USP14 PE=1 SV=3	USP14	1115.8	1429.5	1274.1	1596.8	1180.7	1304.1	1335.9	1308.9	1189.8	1259
Cytochrome c-type heme lyase OS=Homo sapiens OX=9606 GN=HCCS PE=1 SV=1	HCCS	269.6	364.7	378	216.9	297.5	242.5	360.9	299.8	363.4	317.2
G protein-regulated inducer of neurite outgrowth 1 OS=Homo sapiens OX=9606 GN=GPRIN1 PE=1 SV=2	GPRIN1	56.9	71.6	87.8	64.7	65.8	66.3	70.4	61.4	72.8	62.5
40S ribosomal protein S27 OS=Homo sapiens OX=9606 GN=RPS27 PE=1 SV=3	RPS27	1506.7	2533	1603.1	2460.3	2196.9	1738.7	2514.5	2588.3	2041.6	2340.9
Regulation of nuclear pre-mRNA domain-containing protein 1B OS=Homo sapiens OX=9606 GN=RPRD1B PE=1 SV=1	RPRD1B	556.1	670.3	645.3	649.8	565.9	647.3	626.5	605.8	679	662.7
Zinc finger protein 24 OS=Homo sapiens OX=9606 GN=ZNF24 PE=1 SV=4	ZNF24	89.2	144.8	132.7	138.2	121.6	101.3	124.6	146.9	129.7	129.6
Mitochondrial import receptor subunit TOM20 homolog OS=Homo sapiens OX=9606 GN=TOMM20 PE=1 SV=1	TOMM20	299.2	513.3	421.8	364.1	440.4	317	499.1	417.2	436.2	458.3
COBW domain-containing protein 1 OS=Homo sapiens OX=9606 GN=CBWD1 PE=1 SV=1	CBWD1	22.6	27	27.2	22.3	16.9	23.6	24.4	26.9	23.3	27.5
Tumor necrosis factor alpha-induced protein 8 OS=Homo sapiens OX=9606 GN=TNFAIP8 PE=1 SV=1	TNFAIP8	46.1	53.8	46.1	53.6	38.9	46.2	51.3	48.3	50.6	38.1
Thioredoxin domain-containing protein 12 OS=Homo sapiens OX=9606 GN=TXNDC12 PE=1 SV=1	TXNDC12	531.7	789.8	875.4	581.3	508.9	619	496.7	593.1	666.1	668.8
Reticulophagy regulator 3 OS=Homo sapiens OX=9606 GN=RETREG3 PE=1 SV=1	RETREG3	53.6	77.8	88.1	62.3	75.6	62.4	69.4	59.5	67.6	81.3
RNA demethylase ALKBH5 OS=Homo sapiens OX=9606 GN=ALKBH5 PE=1 SV=2	ALKBH5	274	404.7	324.3	363.5	336.5	309.8	364.5	343.3	356.2	358.4
ADP-ribosylation factor 4 OS=Homo sapiens OX=9606 GN=ARF4 PE=1 SV=3	ARF4	957.5	1152.4	1142.2	1291.1	932.5	1114.9	1101.6	1049.5	1001.2	1023.8
Actin-related protein 2 OS=Homo sapiens OX=9606 GN=ACTR2 PE=1 SV=1	ACTR2	1432.1	1887.8	1655.4	1902.7	1594.9	1695.4	1797	1651.5	1650	1576.6
60S acidic ribosomal protein P2 OS=Homo sapiens OX=9606 GN=RPLP2 PE=1 SV=1	RPLP2	5907.6	7438.3	6874.3	7695	5857.3	7280.9	6492	6792.7	6417	7247
General transcription factor IIH subunit 2 OS=Homo sapiens OX=9606 GN=GTF2H2 PE=1 SV=1	GTF2H2	15.6	18.8	16.7	27.2	21.4	25.8	17.9	19	20.2	15
DNA helicase OS=Homo sapiens OX=9606 GN=CHD4 PE=1 SV=1	CHD4	2815.9	4434.7	3508.9	4497.1	3798.9	3274.1	4259.6	4229	3948	3627.9
Ribosome biogenesis regulatory protein homolog OS=Homo sapiens OX=9606 GN=RRS1 PE=1 SV=2	RRS1	623.9	972.5	731.8	993.2	1053	683.2	1089.6	1060	919.9	971
Putative nucleoside diphosphate kinase OS=Homo sapiens OX=9606 GN=NME2P1 PE=5 SV=1	NME2P1	611	1009.1	854	973.1	664.5	907.3	941.9	793.3	1053.3	707.1
Kinesin-like protein KIF20A OS=Homo sapiens OX=9606 GN=KIF20A PE=1 SV=1	KIF20A	40.1	50.8	53.5	56.5	51.5	46.6	49.4	54.2	44.3	42
Rab3 GTPase-activating protein catalytic subunit OS=Homo sapiens OX=9606 GN=RAB3GAP1 PE=1 SV=3	RAB3GAP1	339.5	429.3	372.5	476.1	390.6	394.6	435.5	436.8	385.8	378.3
U5 small nuclear ribonucleoprotein 200 kDa helicase OS=Homo sapiens OX=9606 GN=SNRNP200 PE=1 SV=2	SNRNP200	13574.4	18328.5	15899.8	19895.8	17871.1	15782.1	18662.8	17486.6	16745.2	15834.4
Proteasome subunit beta type-1 OS=Homo sapiens OX=9606 GN=PSMB1 PE=1 SV=2	PSMB1	1354.3	1809.7	1523.8	1869.3	1501.2	1573.1	1722.5	1635.7	1517.6	1378.1
Lysine-specific histone demethylase 1A OS=Homo sapiens OX=9606 GN=KDM1A PE=1 SV=2	KDM1A	860	1138.2	1002.1	1227.6	991.2	1137.8	1081.2	1085.1	1111	1010.6
Transcription intermediary factor 1-beta OS=Homo sapiens OX=9606 GN=TRIM28 PE=1 SV=5	TRIM28	10221.5	12974.2	12235.6	13385	10658.4	12635.4	12328.3	11869.1	12409.2	11102.5
Signal recognition particle 54 kDa protein OS=Homo sapiens OX=9606 GN=SRP54 PE=1 SV=1	SRP54	1269.7	1877	1475	1799.8	1636.7	1473.9	1950.3	1784.6	1628.9	1579.9
Pre-mRNA-processing-splicing factor 8 OS=Homo sapiens OX=9606 GN=PRPF8 PE=1 SV=2	PRPF8	8439.2	13657.6	10485.1	13231.2	13008.2	9798.1	13646.9	13202.4	11592.1	11836.1
Bcl-2-like protein 13 OS=Homo sapiens OX=9606 GN=BCL2L13 PE=1 SV=1	BCL2L13	91.7	137.2	134.2	118.5	123.2	106.5	126.2	107.7	129.2	135.7
Tubulin gamma-1 chain OS=Homo sapiens OX=9606 GN=TUBG1 PE=1 SV=2	TUBG1	398.1	622.4	475.1	571.5	464.2	481	532.6	500.5	528.1	461.3
COMM domain-containing protein 1 OS=Homo sapiens OX=9606 GN=COMMD1 PE=1 SV=1	COMMD1	222.2	273.4	302.1	251.3	228.6	257.9	243.3	261.6	289.1	270.5
Ribosome maturation protein SBDS OS=Homo sapiens OX=9606 GN=SBDS PE=1 SV=4	SBDS	2662.6	3046.5	2876.5	2971.2	2549	2769.1	3096.2	2772.5	2761.2	2703.8
Hermansky-Pudlak syndrome 6 protein OS=Homo sapiens OX=9606 GN=HPS6 PE=1 SV=1	HPS6	15	13.8	16.7	20.9	14	17.4	17.3	10.4	15	20.5
Cytochrome c oxidase assembly protein COX20, mitochondrial OS=Homo sapiens OX=9606 GN=COX20 PE=1 SV=2	COX20	49.3	65.7	60.8	50.4	60.2	46.6	65	58.3	56.3	63.9
Protein Dr1 OS=Homo sapiens OX=9606 GN=DR1 PE=1 SV=1	DR1	52.6	68.4	57	70.4	55.3	60.7	56.9	56.4	65	62
Mitotic spindle assembly checkpoint protein MAD2A OS=Homo sapiens OX=9606 GN=MAD2L1 PE=1 SV=1	MAD2L1	288.5	329.9	302.8	360.4	269.6	334.6	341.7	287.7	326.6	306.1
Ras GTPase-activating protein-binding protein 2 OS=Homo sapiens OX=9606 GN=G3BP2 PE=1 SV=2	G3BP2	1461.8	1803.4	1749.6	2028.7	1453.9	1848.6	1812	1679.1	1873.9	1537.8
tRNA methyltransferase 10 homolog C OS=Homo sapiens OX=9606 GN=TRMT10C PE=1 SV=2	TRMT10C	420.1	683.9	508.1	635	642.2	485.3	692.4	661.2	586.6	570.4
Eukaryotic translation initiation factor 2 subunit 3 OS=Homo sapiens OX=9606 GN=EIF2S3 PE=1 SV=3	EIF2S3	4498.9	5809.1	5011.1	5911.3	5060.7	5211.8	5972.2	5703	5367.7	5304.9
RNA-binding protein 25 OS=Homo sapiens OX=9606 GN=RBM25 PE=1 SV=3	RBM25	2315.2	3347.6	2768.1	3385.4	3289.5	2681.4	3386.3	3214.6	2999.4	2994.2
Hypoxanthine-guanine phosphoribosyltransferase OS=Homo sapiens OX=9606 GN=HPRT1 PE=1 SV=2	HPRT1	2392.9	2666.6	2700.2	3012	2208.9	2771.4	2839.9	2631.4	2772.3	2518.4
RNA helicase OS=Homo sapiens OX=9606 GN=DDX46 PE=1 SV=1	DDX46	2392.1	3740.8	2762.1	3636.2	3198.8	2770.4	3656.6	3507.7	3158.2	3186.6
WW domain-binding protein 11 OS=Homo sapiens OX=9606 GN=WBP11 PE=1 SV=1	WBP11	1710.8	2151.3	2067.7	2262.8	1794.3	2099.6	2040.3	1984.7	2080.5	2044.5
60S ribosomal protein L7-like 1 OS=Homo sapiens OX=9606 GN=RPL7L1 PE=1 SV=2	RPL7L1	576.8	1063.5	699.6	1025.9	939.9	668.3	1012.5	1046.7	840.6	900.5
OTU domain-containing protein 5 OS=Homo sapiens OX=9606 GN=OTUD5 PE=1 SV=1	OTUD5	39.1	42.9	48.5	38	32.2	45.3	38.2	37.1	40.8	45
E3 SUMO-protein ligase RanBP2 OS=Homo sapiens OX=9606 GN=RANBP2 PE=1 SV=2	RANBP2	7095.3	9482.8	8647.5	10012.3	8530.7	8890.1	8993.3	8717	8901.9	8302.5
Protein diaphanous homolog 3 OS=Homo sapiens OX=9606 GN=DIAPH3 PE=1 SV=4	DIAPH3	10.7	15.2	8.8	12.2	10.1	12.4	12.3	13.6	9.8	16.1
Protein CDV3 homolog OS=Homo sapiens OX=9606 GN=CDV3 PE=1 SV=1	CDV3	2122.2	2781.1	2500.8	2938.8	2142.4	2796	2573.1	2461	2543.2	2471.5
Protein transport protein Sec24D OS=Homo sapiens OX=9606 GN=SEC24D PE=1 SV=1	SEC24D	53.8	58	67.4	61.7	57.5	57.3	62.2	52.7	56.9	68
5'-nucleotidase domain-containing protein 2 OS=Homo sapiens OX=9606 GN=NT5DC2 PE=1 SV=1	NT5DC2	268.7	380.2	339.9	379.3	395	311.4	365.4	357.2	326.7	334.7
Nuclear receptor 2C2-associated protein OS=Homo sapiens OX=9606 GN=NR2C2AP PE=1 SV=1	NR2C2AP	135.4	190.9	163.8	194.1	153.9	181.3	175.1	180.7	175.4	163.1
Epoxide hydrolase 1 OS=Homo sapiens OX=9606 GN=EPHX1 PE=1 SV=1	EPHX1	353.1	554	490.7	324.9	502	351.3	562.7	467.4	540.6	531.5
Endothelial differentiation-related factor 1 OS=Homo sapiens OX=9606 GN=EDF1 PE=1 SV=1	EDF1	2279.6	2831.3	2601.8	2942.2	2262.2	2620.1	2757.7	2423.5	2712.2	2485.8
Mediator of RNA polymerase II transcription subunit 18 OS=Homo sapiens OX=9606 GN=MED18 PE=1 SV=1	MED18	492.4	605.8	557.5	596.6	532.5	598.6	594.1	515.9	549.6	508.3
Guanine nucleotide-binding protein subunit gamma OS=Homo sapiens OX=9606 GN=DNAJC25-GNG10 PE=3 SV=1	DNAJC25-GNG10	8.9	23.6	24.4	7.8	14.3	10.3	13.1	15.7	19.4	26
Malignant T-cell-amplified sequence 1 OS=Homo sapiens OX=9606 GN=MCTS1 PE=1 SV=1	MCTS1	1037.5	1145.7	1198	1168.3	984.2	1122.7	1195.5	1079.6	1081.9	1042.2
Probable ATP-dependent RNA helicase DDX27 OS=Homo sapiens OX=9606 GN=DDX27 PE=1 SV=2	DDX27	503	802.4	626.4	831.4	870.8	582.4	896.8	870.6	760.8	782.2
Putative RNA-binding protein Luc7-like 2 OS=Homo sapiens OX=9606 GN=LUC7L2 PE=1 SV=2	LUC7L2	3966.9	5355.2	4881.9	5163.4	4246	4341.3	4874.7	4801.3	5187	4917.9
Proteasome assembly chaperone 1 OS=Homo sapiens OX=9606 GN=PSMG1 PE=1 SV=1	PSMG1	56.5	60.6	53.1	71.3	51	62.2	62.3	53.9	62.1	54
Serine/arginine repetitive matrix protein 2 OS=Homo sapiens OX=9606 GN=SRRM2 PE=1 SV=2	SRRM2	3859.8	4774.1	4662.2	5150.3	4099.3	4762.7	4555.8	4350.6	4603.3	4338.5
Small subunit processome component 20 homolog OS=Homo sapiens OX=9606 GN=UTP20 PE=1 SV=3	UTP20	30.7	38.3	31.8	43	48.1	30.6	50.4	57.9	39.6	41.7
Chromatin target of PRMT1 protein OS=Homo sapiens OX=9606 GN=CHTOP PE=1 SV=1	CHTOP	205.5	319.5	237.5	366.1	343.1	237.7	327.8	330	215.2	251.6
Protein BUD31 homolog OS=Homo sapiens OX=9606 GN=BUD31 PE=1 SV=2	BUD31	357	587.4	451.4	543.9	510.3	402.8	570.7	551.1	500.8	484.1
WD repeat-containing protein 74 OS=Homo sapiens OX=9606 GN=WDR74 PE=1 SV=1	WDR74	59.6	73.5	81.1	74	70.2	68.9	71.6	56.8	70.6	61.4
Katanin p60 ATPase-containing subunit A-like 2 (Fragment) OS=Homo sapiens OX=9606 GN=KATNAL2 PE=1 SV=1	KATNAL2	273.8	340.2	342.6	330.6	267.5	316.7	329.6	294	317.3	278.7
PDZ and LIM domain protein 5 OS=Homo sapiens OX=9606 GN=PDLIM5 PE=1 SV=5	PDLIM5	777.3	1065	869.7	1092.1	882.3	921	1007.6	963.9	954.4	933.9
Uncharacterized protein C1orf167 (Fragment) OS=Homo sapiens OX=9606 GN=C1orf167 PE=1 SV=1	C1orf167	214.7	506.3	306	423	360.1	297.9	434.3	371.6	389.6	259.5
DCC-interacting protein 13-alpha OS=Homo sapiens OX=9606 GN=APPL1 PE=1 SV=1	APPL1	71.6	96.8	109.2	101.5	88.2	100.8	91.6	87.2	93.7	76.3
Glucose-induced degradation protein 8 homolog OS=Homo sapiens OX=9606 GN=GID8 PE=1 SV=1	GID8	283.7	387.6	345.7	367.2	276.3	372.6	345.8	330.2	338.2	351.6
Sulfotransferase 1A1 OS=Homo sapiens OX=9606 GN=SULT1A1 PE=1 SV=3	SULT1A1	165	194	190.5	230.6	171.9	190.9	181.2	198	198.2	196.5
Acyl-coenzyme A thioesterase 9, mitochondrial (Fragment) OS=Homo sapiens OX=9606 GN=ACOT9 PE=1 SV=1	ACOT9	111.3	181.9	142.7	174.3	172.7	134.7	160.9	178.3	160.3	157.4
Adenylyl cyclase-associated protein 1 (Fragment) OS=Homo sapiens OX=9606 GN=CAP1 PE=1 SV=8	CAP1	242.7	259.1	284.5	305	247.1	285.2	261.3	238.4	280.2	261.3
Surfeit locus protein 6 OS=Homo sapiens OX=9606 GN=SURF6 PE=1 SV=3	SURF6	80.6	130.2	99	129.1	147.7	92.1	150.6	150.6	118.7	140.7
Proteasome subunit alpha type-3 OS=Homo sapiens OX=9606 GN=PSMA3 PE=1 SV=2	PSMA3	3533.1	4604.1	4105.4	4703.5	3676.6	4243.5	4355.6	4053.8	4278.7	3832.8
Small nuclear ribonucleoprotein Sm D2 OS=Homo sapiens OX=9606 GN=SNRPD2 PE=1 SV=1	SNRPD2	29.4	39	38.2	40.9	32.8	29.9	41.2	37.5	46.7	32.6
V-type proton ATPase 116 kDa subunit a1 OS=Homo sapiens OX=9606 GN=ATP6V0A1 PE=1 SV=3	ATP6V0A1	333.4	434	411.3	406.3	365	378.4	410.3	391.7	410.1	388.1
Ribosome production factor 2 homolog (Fragment) OS=Homo sapiens OX=9606 GN=RPF2 PE=1 SV=1	RPF2	249.6	490.5	312.9	453.8	462.3	288.4	535.5	493.6	392.3	409.3
Host cell factor 1 OS=Homo sapiens OX=9606 GN=HCFC1 PE=1 SV=2	HCFC1	119.8	144.9	140.8	142.7	121.2	133.2	138.6	124	131.2	143.1
Hexokinase OS=Homo sapiens OX=9606 GN=HK2 PE=1 SV=1	HK2	456.4	694.3	562	663.3	624.1	539.1	656.3	618.5	602	570.2
Filamin-A OS=Homo sapiens OX=9606 GN=FLNA PE=1 SV=4	FLNA	17050.2	21570.1	19901.8	23934.1	20194.4	19690.8	21304.5	20274.9	20721.4	20159.7
Fructose-bisphosphate aldolase C OS=Homo sapiens OX=9606 GN=ALDOC PE=1 SV=2	ALDOC	1408.2	1149	1362.5	1318	1158	1364.8	1298.4	1264	1212.1	1486.6
tRNA (adenine(58)-N(1))-methyltransferase non-catalytic subunit TRM6 OS=Homo sapiens OX=9606 GN=TRMT6 PE=1 SV=1	TRMT6	524.6	768.4	600.9	735.5	641.4	615.1	708.7	646.5	675.8	630
TATA-binding protein-associated factor 2N OS=Homo sapiens OX=9606 GN=TAF15 PE=1 SV=1	TAF15	195.2	253.9	236.1	251.8	190.5	233.4	202.4	238.9	231.3	186.1
Luc7-like protein 3 OS=Homo sapiens OX=9606 GN=LUC7L3 PE=1 SV=2	LUC7L3	3433.1	4411.6	3839.4	4415.1	4021.8	3922.7	4798.7	4527.3	4056.7	4106.9
Glutathione S-transferase OS=Homo sapiens OX=9606 GN=GSTM2 PE=1 SV=1	GSTM2	786.6	967.1	836	1065.8	773.9	947.7	913.9	884.6	832.4	762.5
Microtubule-associated protein OS=Homo sapiens OX=9606 GN=MAPT PE=1 SV=1	MAPT	87.2	83	89.8	102.2	75.7	96.3	79.2	88.1	86.1	88.6
Putative MAGE domain-containing protein MAGEA13P OS=Homo sapiens OX=9606 GN=MAGEA13P PE=5 SV=1	MAGEA13P	84.4	89.9	98.5	100.6	78.4	92.5	102.6	96.6	91	86.3
RNA-binding protein 45 OS=Homo sapiens OX=9606 GN=RBM45 PE=1 SV=1	RBM45	10.4	15.4	12.8	16.9	13.4	12	13.2	14.3	12.9	14.6
Cyclin-dependent kinase 4 OS=Homo sapiens OX=9606 GN=CDK4 PE=1 SV=2	CDK4	975.2	1226.2	1065.5	1320.8	1030.5	1104.3	1248	1138.1	1185.3	1087.9
Protein MON2 homolog OS=Homo sapiens OX=9606 GN=MON2 PE=1 SV=1	MON2	26.4	26.3	27	35.3	28.2	21.8	31.8	29.2	32.4	28.1
60S ribosomal protein L37 OS=Homo sapiens OX=9606 GN=RPL37 PE=1 SV=2	RPL37	433.2	653	445.8	561.4	678.9	450.9	724.8	730.6	515.4	651.1
U2 snRNP-associated SURP motif-containing protein OS=Homo sapiens OX=9606 GN=U2SURP PE=1 SV=2	U2SURP	473.8	831	563.5	814.1	751.7	546.2	790.5	821.1	668.3	756.3
Thioredoxin-like protein 4A OS=Homo sapiens OX=9606 GN=TXNL4A PE=1 SV=1	TXNL4A	351.5	442.6	399.1	438.6	351.8	436.3	409.4	377	408.6	371.3
Glutamine--fructose-6-phosphate aminotransferase [isomerizing] 1 OS=Homo sapiens OX=9606 GN=GFPT1 PE=1 SV=3	GFPT1	1694.6	2341.8	1860.8	2337.5	2080	1953.2	2412	2256.5	2089.5	1981.5
Ribosome biogenesis protein BMS1 homolog OS=Homo sapiens OX=9606 GN=BMS1 PE=1 SV=1	BMS1	219.7	386	269.1	375.4	403.9	253.4	393	402	315.1	350.2
Ribonuclease P protein subunit p14 OS=Homo sapiens OX=9606 GN=RPP14 PE=1 SV=3	RPP14	79	110.3	102.2	103.4	97.9	102	104.1	97.3	100.3	95.5
Centromere protein X OS=Homo sapiens OX=9606 GN=CENPX PE=1 SV=1	CENPX	169.5	196.1	207.7	207.2	156.3	182.4	191.5	177.5	190.3	193.5
Oxysterol-binding protein-related protein 6 OS=Homo sapiens OX=9606 GN=OSBPL6 PE=1 SV=1	OSBPL6	28.7	45.2	39.7	48.7	38	33.1	52	42.9	36.2	39
Methylmalonate-semialdehyde dehydrogenase [acylating], mitochondrial OS=Homo sapiens OX=9606 GN=ALDH6A1 PE=1 SV=2	ALDH6A1	12.8	10.1	19.6	14.6	9	12.6	14.4	13.6	13.4	14
RNA-binding protein FUS OS=Homo sapiens OX=9606 GN=FUS PE=1 SV=1	FUS	6862.9	8244.9	7995.2	9111.1	7106.3	8269.7	7960.3	7285.5	8028.4	7489.3
Ribosomal biogenesis protein LAS1L OS=Homo sapiens OX=9606 GN=LAS1L PE=1 SV=2	LAS1L	390.4	508.7	461.6	579.8	481.9	449.7	522.7	501.2	485.9	487.3
SRSF protein kinase 2 OS=Homo sapiens OX=9606 GN=SRPK2 PE=1 SV=3	SRPK2	41.2	61.8	56.6	54.3	59.1	38.6	58.3	58.2	51	50.8
Bleomycin hydrolase OS=Homo sapiens OX=9606 GN=BLMH PE=1 SV=1	BLMH	5351.9	6447.6	5927	7369.6	5530.7	6164.6	6383.9	5816.5	6112.3	5668
Biorientation of chromosomes in cell division protein 1-like 1 OS=Homo sapiens OX=9606 GN=BOD1L1 PE=1 SV=2	BOD1L1	49.7	61.3	43.8	62.2	45.2	51.2	57.8	55.1	53.8	48.7
Phosphatidylinositol transfer protein alpha isoform OS=Homo sapiens OX=9606 GN=PITPNA PE=1 SV=2	PITPNA	661.7	812	724.2	885.8	645.7	769	770.9	700.5	735.2	680.6
Endoplasmic reticulum chaperone BiP OS=Homo sapiens OX=9606 GN=HSPA5 PE=1 SV=2	HSPA5	17376.1	22564.5	22628.7	20494.4	19459.6	21768	20772.8	19939.5	21622.9	20493.7
MARCKS-related protein OS=Homo sapiens OX=9606 GN=MARCKSL1 PE=1 SV=2	MARCKSL1	1644.2	2088.7	2036.6	1947.3	1847.4	1891.9	2077.8	1734.4	1998	1842.7
Tropomodulin-3 OS=Homo sapiens OX=9606 GN=TMOD3 PE=1 SV=1	TMOD3	247	322.7	306.9	343	267.7	347.7	295	291.6	314.4	298.6
Elongation factor 1-alpha 1 OS=Homo sapiens OX=9606 GN=EEF1A1 PE=1 SV=1	EEF1A1	36526.3	43126.6	41713.9	48553	39802.5	42034.2	47187.4	43458.3	43610.8	40765.8
Bifunctional 3'-phosphoadenosine 5'-phosphosulfate synthase 2 OS=Homo sapiens OX=9606 GN=PAPSS2 PE=1 SV=2	PAPSS2	34.4	64.7	44.6	57.5	48.1	39.6	52	48.1	44	54.1
Amidophosphoribosyltransferase OS=Homo sapiens OX=9606 GN=PPAT PE=1 SV=1	PPAT	1270.5	1407.5	1361.1	1599.8	1287.9	1461.5	1577	1444.2	1413.5	1342.5
Transcription factor BTF3 OS=Homo sapiens OX=9606 GN=BTF3 PE=1 SV=1	BTF3	248.6	276.2	273.3	295.9	237.3	251.1	287.1	241.4	278.3	249.9
Glutamate dehydrogenase 1, mitochondrial OS=Homo sapiens OX=9606 GN=GLUD1 PE=1 SV=2	GLUD1	4111.4	5846.5	5271.6	5281.4	5229.6	4927.8	5270.9	5155.3	5130.8	4750
Armadillo repeat-containing protein 6 OS=Homo sapiens OX=9606 GN=ARMC6 PE=1 SV=2	ARMC6	1190.6	1450.8	1354.2	1598.8	1227.7	1349.9	1453.1	1323.5	1434.9	1304.7
Coatomer subunit epsilon OS=Homo sapiens OX=9606 GN=COPE PE=1 SV=3	COPE	1980.7	2214.4	2269.5	2407.6	1941.5	2274.3	2273.6	2030.8	2205	2108.2
Delta(14)-sterol reductase LBR OS=Homo sapiens OX=9606 GN=LBR PE=1 SV=2	LBR	169.8	312.9	257.2	184.8	273.1	185.8	286	252	261.5	287.6
Mitochondrial import inner membrane translocase subunit Tim13 OS=Homo sapiens OX=9606 GN=TIMM13 PE=1 SV=1	TIMM13	174.6	237.4	346	195.2	181.4	200.7	171.7	188.6	260.3	231.6
B-cell CLL/lymphoma 7 protein family member C OS=Homo sapiens OX=9606 GN=BCL7C PE=1 SV=3	BCL7C	46.3	76.9	68.3	82.4	59.4	74	62.4	66.7	62.6	64.8
GA-binding protein alpha chain OS=Homo sapiens OX=9606 GN=GABPA PE=1 SV=1	GABPA	145.6	187.3	147.4	184.4	140.4	167.2	150	160.7	168.8	157.1
Tetratricopeptide repeat protein 1 OS=Homo sapiens OX=9606 GN=TTC1 PE=1 SV=1	TTC1	2337	2979.9	2643.9	3044.9	2247.8	2944.8	2658.8	2581.7	2708.8	2572.8
Cytoplasmic dynein 1 intermediate chain 2 (Fragment) OS=Homo sapiens OX=9606 GN=DYNC1I2 PE=1 SV=1	DYNC1I2	108.3	149.1	130.8	172.5	132.1	146.1	140.3	129.2	122.8	124.4
Proteasome subunit beta type-5 OS=Homo sapiens OX=9606 GN=PSMB5 PE=1 SV=3	PSMB5	2165	2967.1	2321.9	3049.1	2425.5	2490.7	2791.6	2679.3	2573.5	2479
RuvB-like 2 OS=Homo sapiens OX=9606 GN=RUVBL2 PE=1 SV=3	RUVBL2	6406.1	7570.9	7347.1	8428.5	6547.8	7821	7535.2	7174.5	7531.6	6883.3
DDB1- and CUL4-associated factor 7 OS=Homo sapiens OX=9606 GN=DCAF7 PE=1 SV=1	DCAF7	916.8	1387.6	1131.4	1353	1047.4	1139.6	1233.7	1259.4	1238.7	1094.9
Non-specific serine/threonine protein kinase OS=Homo sapiens OX=9606 GN=MARK2 PE=1 SV=3	MARK2	100	148.8	140.2	161.5	146.9	101.3	163.4	163.1	130.6	154.5
NEDD8-conjugating enzyme Ubc12 OS=Homo sapiens OX=9606 GN=UBE2M PE=1 SV=1	UBE2M	5050.7	6169	5784.4	5873.7	4649.5	5560.8	5804.5	5444.5	5781.3	5373.4
Hepatocyte growth factor-regulated tyrosine kinase substrate OS=Homo sapiens OX=9606 GN=HGS PE=1 SV=1	HGS	1129	1417.8	1280.1	1535.8	1146.7	1379.7	1333	1279.3	1277.6	1189.2
Endoribonuclease LACTB2 OS=Homo sapiens OX=9606 GN=LACTB2 PE=1 SV=2	LACTB2	806.8	961	937.7	1058.7	834.4	995.9	1010.1	910	968.6	841.7
Receptor of activated protein C kinase 1 OS=Homo sapiens OX=9606 GN=RACK1 PE=1 SV=3	RACK1	7864.9	10068.4	9053.3	11154.5	9374.8	8715.5	10438.3	10104.6	9615.9	9850.7
Beta-arrestin-2 OS=Homo sapiens OX=9606 GN=ARRB2 PE=1 SV=2	ARRB2	306.1	370.6	355.5	376.6	386.3	306.6	418.2	346.8	403	356.6
Procollagen-lysine,2-oxoglutarate 5-dioxygenase 1 OS=Homo sapiens OX=9606 GN=PLOD1 PE=1 SV=2	PLOD1	492.1	685.6	581.7	735.3	687.6	565.5	645.4	673.9	565.8	578.9
UMP-CMP kinase OS=Homo sapiens OX=9606 GN=CMPK1 PE=1 SV=3	CMPK1	2382.5	2975.3	3047.3	2596.1	2135	2735.8	2643.2	2544.3	2787.2	2800.4
Cleavage stimulation factor subunit 3 OS=Homo sapiens OX=9606 GN=CSTF3 PE=1 SV=1	CSTF3	538.8	539.6	628.9	799.6	699.1	618.9	698.1	701.8	616.2	637.7
T-complex protein 1 subunit alpha OS=Homo sapiens OX=9606 GN=TCP1 PE=1 SV=1	TCP1	7358.8	9170.3	8654.5	9405.7	7658.9	8914.4	8514.1	8277.3	8669.9	8046.8
Protein kinase C and casein kinase substrate in neurons protein 3 OS=Homo sapiens OX=9606 GN=PACSIN3 PE=1 SV=2	PACSIN3	207.4	302.5	307.8	270.3	236.7	238.2	249.5	267.6	265.1	267
Ras-related protein Rab-14 OS=Homo sapiens OX=9606 GN=RAB14 PE=1 SV=4	RAB14	1452	2078.7	1778.2	1852.6	1652.4	1682.8	1830.8	1721.9	1772.7	1736.9
Voltage-dependent anion-selective channel protein 1 OS=Homo sapiens OX=9606 GN=VDAC1 PE=1 SV=2	VDAC1	7915.4	10849.1	10464.5	7146.7	8967.5	8777.6	10189.5	9227.2	10548.6	10638.3
28 kDa heat- and acid-stable phosphoprotein OS=Homo sapiens OX=9606 GN=PDAP1 PE=1 SV=1	PDAP1	2740.9	3357.9	3009.3	3577.2	2835.5	2956.6	3184.7	2934.3	2926.6	2978.7
DNA topoisomerase 1 OS=Homo sapiens OX=9606 GN=TOP1 PE=1 SV=2	TOP1	2912.1	5157.6	3628.5	4917	4738.8	3221.8	5836.7	5748.9	4473.2	4973.8
14-3-3 protein theta OS=Homo sapiens OX=9606 GN=YWHAQ PE=1 SV=1	YWHAQ	5115	5989.1	5713.3	6552	5053.7	5823	6157.1	5588.3	5958	5308.3
Cell division cycle protein 123 homolog OS=Homo sapiens OX=9606 GN=CDC123 PE=1 SV=1	CDC123	938	1161.1	1030.9	1223.9	967.7	1042.7	1161.3	1004.8	1118.1	1016.3
Heterogeneous nuclear ribonucleoprotein D-like OS=Homo sapiens OX=9606 GN=HNRNPDL PE=1 SV=3	HNRNPDL	6821.1	9192.3	9600	8077.3	6757.3	7824.5	6403.3	7443.4	7981.1	8323.6
E3 ubiquitin-protein ligase Praja-2 OS=Homo sapiens OX=9606 GN=PJA2 PE=1 SV=4	PJA2	86	100.9	99	119.6	92	111.9	94.8	96.4	109.3	101.8
MYG1 exonuclease OS=Homo sapiens OX=9606 GN=MYG1 PE=1 SV=3	MYG1	591.8	721.4	673	725.2	554.1	679.2	682.5	639.5	648.5	616.2
[truncated: 1,571 more rows]

## Sheet: F117A vs I216E
Description	Gene Symbol	Abundance: F1: 126, Sample, 1, F117A	Abundance: F1: 127N, Sample, 2, F117A	Abundance: F1: 128C, Sample, 1, F117A DOX	Abundance: F1: 129N, Sample, 2, F117A DOX	Abundance: F1: 129C, Sample, 3, F117A DOX	Abundance: F1: 127C, Sample, 1, I216E	Abundance: F1: 128N, Sample, 2, I216E	Abundance: F1: 130N, Sample, 1, I216E DOX	Abundance: F1: 130C, Sample, 2, I216E DOX	Abundance: F1: 131, Sample, 3, I216E DOX
Mth938 domain-containing protein OS=Homo sapiens OX=9606 GN=AAMDC PE=1 SV=1	AAMDC	417.6	381.6	296.4	311.2	319.6	418	299.4	302.3	313.8	263.2
Angio-associated migratory cell protein OS=Homo sapiens OX=9606 GN=AAMP PE=1 SV=1	AAMP	200.4	164.4	154.1	166.8	165.2	218.8	135	170.5	149.4	147.4
Protein AAR2 homolog OS=Homo sapiens OX=9606 GN=AAR2 PE=1 SV=2	AAR2	27.8	23	23.8	26.2	24.4	28.3	22.6	27.6	27.7	20.4
Alanine--tRNA ligase, cytoplasmic OS=Homo sapiens OX=9606 GN=AARS1 PE=4 SV=1	AARS1	923.7	775.7	701.8	789.7	851.3	1062	774.2	825.5	824.9	818.8
L-aminoadipate-semialdehyde dehydrogenase-phosphopantetheinyl transferase OS=Homo sapiens OX=9606 GN=AASDHPPT PE=1 SV=2	AASDHPPT	1469.6	1251.2	1116.3	1390.3	1383	1666.4	1229	1335.6	1282.4	1296.7
ATP-binding cassette sub-family D member 3 OS=Homo sapiens OX=9606 GN=ABCD3 PE=1 SV=2	ABCD3	87.9	76.1	116.5	126.5	141.9	181.7	102.2	123.7	147.9	113
ATP-binding cassette sub-family E member 1 OS=Homo sapiens OX=9606 GN=ABCE1 PE=1 SV=1	ABCE1	7917.3	6212.4	6044.4	7232.2	7698.9	9584.1	6860.7	7283.3	7155.7	7251.4
ATP-binding cassette sub-family F member 1 OS=Homo sapiens OX=9606 GN=ABCF1 PE=1 SV=2	ABCF1	1290.6	1019.6	1032.9	1275.2	1374.9	1651.1	1125.5	1207	1186.2	1200.7
ATP-binding cassette sub-family F member 2 OS=Homo sapiens OX=9606 GN=ABCF2 PE=1 SV=2	ABCF2	1468	1068	1092.1	1379.6	1490.4	1724.3	1229.3	1403.8	1374.5	1448.8
Palmitoyl-protein thioesterase ABHD10, mitochondrial OS=Homo sapiens OX=9606 GN=ABHD10 PE=1 SV=1	ABHD10	210.6	180	167.5	195.3	195.7	248.6	172.9	190.1	181	183.5
Abl interactor 1 OS=Homo sapiens OX=9606 GN=ABI1 PE=1 SV=4	ABI1	330	282.3	232.4	284.7	266.4	341.8	257.4	271.1	252.4	248.4
Activator of basal transcription 1 OS=Homo sapiens OX=9606 GN=ABT1 PE=1 SV=1	ABT1	13.5	11.3	11.3	10	11.1	16.9	11	14.1	13.9	14.5
3-ketoacyl-CoA thiolase, mitochondrial OS=Homo sapiens OX=9606 GN=ACAA2 PE=1 SV=2	ACAA2	90.6	87	66	77.7	76.9	109.8	77.2	75.1	69.5	70.4
Acetyl-CoA carboxylase 1 OS=Homo sapiens OX=9606 GN=ACACA PE=1 SV=2	ACACA	116.9	115.4	100.4	118.1	133.6	144.5	114.8	119.3	115.4	104.9
Complex I assembly factor ACAD9, mitochondrial OS=Homo sapiens OX=9606 GN=ACAD9 PE=1 SV=1	ACAD9	296.4	244.3	256.7	269.7	296.1	389.9	261	289.4	294.8	265.2
Medium-chain specific acyl-CoA dehydrogenase, mitochondrial OS=Homo sapiens OX=9606 GN=ACADM PE=1 SV=1	ACADM	483.4	442	376.6	403.2	401.1	551.9	392.9	398.3	393.4	370.6
Short/branched chain specific acyl-CoA dehydrogenase, mitochondrial OS=Homo sapiens OX=9606 GN=ACADSB PE=1 SV=1	ACADSB	88.9	88.7	67	71.9	70.1	92.7	69.7	70.4	78.1	65.3
Acetyl-CoA acetyltransferase, mitochondrial OS=Homo sapiens OX=9606 GN=ACAT1 PE=1 SV=1	ACAT1	3892.1	3454.5	3036.2	3324.3	3347.6	4406.5	3213.7	3268.2	3205.5	3171.6
Acetyl-CoA acetyltransferase, cytosolic OS=Homo sapiens OX=9606 GN=ACAT2 PE=1 SV=2	ACAT2	4137.8	3401.4	3293.2	3344.9	3325.2	4350.6	3764.7	3085.8	3524.1	3427.5
Golgi resident protein GCP60 OS=Homo sapiens OX=9606 GN=ACBD3 PE=1 SV=4	ACBD3	225.3	227.9	183.2	220.6	225.2	250.4	210.3	212	218.8	196.6
Apoptotic chromatin condensation inducer in the nucleus OS=Homo sapiens OX=9606 GN=ACIN1 PE=1 SV=2	ACIN1	2518	2253.2	1907	2123	2178.1	2563.8	1938.2	2146.3	2000.2	2035.4
ATP-citrate synthase OS=Homo sapiens OX=9606 GN=ACLY PE=1 SV=3	ACLY	18450.4	15441.8	14971.2	17201.3	18360.2	22470	16813.2	16857.9	17065.9	16508.5
Aconitate hydratase, mitochondrial OS=Homo sapiens OX=9606 GN=ACO2 PE=1 SV=1	ACO2	778	670.5	640.8	831.6	804.7	990.1	675.5	810.8	751.8	753.2
Acyl-coenzyme A thioesterase 13 OS=Homo sapiens OX=9606 GN=ACOT13 PE=1 SV=1	ACOT13	425.8	388.4	327	357.2	356	511.2	327.7	355.3	352.8	337.9
Cytosolic acyl coenzyme A thioester hydrolase OS=Homo sapiens OX=9606 GN=ACOT7 PE=1 SV=3	ACOT7	1670.3	1487.9	1251.2	1492.8	1640.7	1964.7	1379.5	1513.1	1417.6	1424.4
Low molecular weight phosphotyrosine protein phosphatase OS=Homo sapiens OX=9606 GN=ACP1 PE=1 SV=3	ACP1	125.1	121	74.7	110.1	103.4	120	86.3	112.3	99.9	93.3
Long-chain-fatty-acid--CoA ligase 4 OS=Homo sapiens OX=9606 GN=ACSL4 PE=1 SV=2	ACSL4	85	79.6	67.5	88.8	79.2	111.8	70.1	84.1	80.9	84.4
Actin, alpha skeletal muscle OS=Homo sapiens OX=9606 GN=ACTA1 PE=1 SV=1	ACTA1	7085.8	6368.8	5658.5	6323.9	6602.2	8441.7	6157	6284.9	6165.6	6248.9
Actin, cytoplasmic 1 (Fragment) OS=Homo sapiens OX=9606 GN=ACTB PE=1 SV=1	ACTB	99.7	97.4	71.6	104.3	94.4	121.3	80.5	77.8	80	53
Actin, cytoplasmic 1 OS=Homo sapiens OX=9606 GN=ACTB PE=1 SV=1	ACTB	2971.7	2681.8	2431	2878.3	3144.2	3670.4	2499.4	3043.6	2913.3	2877.2
Actin, cytoplasmic 2 (Fragment) OS=Homo sapiens OX=9606 GN=ACTG1 PE=1 SV=8	ACTG1	163.9	127.1	221.8	162.9	167.4	295.8	248.4	280.8	182.3	168.5
Actin-like protein 6A OS=Homo sapiens OX=9606 GN=ACTL6A PE=1 SV=1	ACTL6A	448.4	391.8	350.9	390.4	396.3	501.4	363.4	382.8	369.5	374.7
Alpha-actinin-1 OS=Homo sapiens OX=9606 GN=ACTN1 PE=1 SV=2	ACTN1	1999.6	1774.9	1515.1	1717.2	1883.9	2286.9	1729.2	1770.7	1727.4	1707.2
Alpha-actinin-4 OS=Homo sapiens OX=9606 GN=ACTN4 PE=1 SV=2	ACTN4	6275.4	5527.3	4759.6	5577.3	5859.5	7103.7	5187.5	5383	5192.5	5053.6
Actin-related protein 10 (Fragment) OS=Homo sapiens OX=9606 GN=ACTR10 PE=1 SV=1	ACTR10	70.5	54.2	60.1	66.3	58.2	84.5	63.7	65.6	61.5	70.3
Alpha-centractin OS=Homo sapiens OX=9606 GN=ACTR1A PE=1 SV=1	ACTR1A	894.4	771.1	677.2	718.7	763.1	1049.8	772.8	679	755.3	718.2
Beta-centractin OS=Homo sapiens OX=9606 GN=ACTR1B PE=1 SV=1	ACTR1B	390.6	334	309.7	328.3	357.8	477.3	339.1	308.5	318	286.6
Actin-related protein 2 OS=Homo sapiens OX=9606 GN=ACTR2 PE=1 SV=1	ACTR2	1011.3	910.2	778.2	947.4	981	1225.4	867.2	929.7	915	895.2
Actin-related protein 3 OS=Homo sapiens OX=9606 GN=ACTR3 PE=1 SV=3	ACTR3	932.2	862.3	725.6	818	895.4	1105.5	812.3	782.2	819.9	784.6
Double-stranded RNA-specific adenosine deaminase (Fragment) OS=Homo sapiens OX=9606 GN=ADAR PE=1 SV=1	ADAR	2910.1	2514.5	2364.5	2714.9	2789.8	3536	2542.6	2630.5	2536.2	2612.8
Alpha-adducin OS=Homo sapiens OX=9606 GN=ADD1 PE=1 SV=1	ADD1	99.9	98.4	79	102.3	103.3	112.9	80.7	90.8	86.5	80.2
Gamma-adducin OS=Homo sapiens OX=9606 GN=ADD3 PE=1 SV=1	ADD3	205	182.4	163.9	177.5	185.1	247.1	166.6	193.4	159.4	170.3
Alcohol dehydrogenase class-3 OS=Homo sapiens OX=9606 GN=ADH5 PE=1 SV=4	ADH5	894.3	763.7	704.3	823.6	892.5	1059.6	738.3	847.1	838.6	834.1
1,2-dihydroxy-3-keto-5-methylthiopentene dioxygenase OS=Homo sapiens OX=9606 GN=ADI1 PE=1 SV=1	ADI1	433.9	366	282.4	352.6	393.9	456.4	294.3	365.1	302.2	311.4
Adenosine kinase OS=Homo sapiens OX=9606 GN=ADK PE=1 SV=2	ADK	97.4	89.3	74.7	92.7	94.7	115.6	78.8	93	78.5	79.7
Proteasomal ubiquitin receptor ADRM1 OS=Homo sapiens OX=9606 GN=ADRM1 PE=1 SV=2	ADRM1	742.2	685.2	534.4	715.3	721.5	837.1	528.2	653.1	608.3	585.1
Adenylosuccinate lyase OS=Homo sapiens OX=9606 GN=ADSL PE=1 SV=1	ADSL	292.4	222	225.3	283.2	311	329.9	267.7	293.7	297	300.3
Adenylosuccinate synthetase isozyme 2 OS=Homo sapiens OX=9606 GN=ADSS2 PE=1 SV=3	ADSS2	1316.7	1126.3	1025.6	1277.7	1298.9	1502.1	1171.1	1196.9	1213.9	1134.8
Afadin OS=Homo sapiens OX=9606 GN=AFDN PE=1 SV=2	AFDN	616.2	541	466.1	535.5	526.4	686.5	479	514.9	480.4	483.8
Acylglycerol kinase, mitochondrial OS=Homo sapiens OX=9606 GN=AGK PE=1 SV=1	AGK	496.1	374.4	480.4	539.9	562.1	752.4	421	584.7	554.6	535.2
Alkyldihydroxyacetonephosphate synthase, peroxisomal OS=Homo sapiens OX=9606 GN=AGPS PE=1 SV=1	AGPS	728.3	594.8	561.3	651.9	689	887.1	622.8	665.3	657.2	655.8
Adenosylhomocysteinase OS=Homo sapiens OX=9606 GN=AHCY PE=1 SV=4	AHCY	11083.4	9114.4	8637.5	10272.9	11072.8	13208.7	9472.1	10240.7	10074.5	10088.2
S-adenosylhomocysteine hydrolase-like protein 1 OS=Homo sapiens OX=9606 GN=AHCYL1 PE=1 SV=2	AHCYL1	699.7	577.7	507.9	570	584.6	767.6	551.3	547.1	565.4	549.3
Neuroblast differentiation-associated protein AHNAK OS=Homo sapiens OX=9606 GN=AHNAK PE=1 SV=2	AHNAK	7091.9	6261.3	5216.9	5859.1	6025.5	7258.8	5136.3	5943.4	5733.1	6014.8
Activator of 90 kDa heat shock protein ATPase homolog 1 OS=Homo sapiens OX=9606 GN=AHSA1 PE=1 SV=1	AHSA1	1643.1	1559.5	1191.9	1386.6	1439.3	1754.3	1357.2	1325.7	1421.9	1324.3
Alpha-2-HS-glycoprotein OS=Homo sapiens OX=9606 GN=AHSG PE=1 SV=2	AHSG	799.5	1766.2	731.4	827.6	873.4	683.2	747.4	744.1	697.1	1390.5
Apoptosis-inducing factor 1, mitochondrial OS=Homo sapiens OX=9606 GN=AIFM1 PE=1 SV=1	AIFM1	3113.9	2571.8	2667.2	2758.6	2827.8	3867.3	2582.9	2718.1	2731.6	2551.1
Aminoacyl tRNA synthase complex-interacting multifunctional protein 1 OS=Homo sapiens OX=9606 GN=AIMP1 PE=1 SV=2	AIMP1	1980.2	1642.1	1485.2	1899.1	1986.8	2157.1	1639.3	1882.4	1939.5	1876.3
Aminoacyl tRNA synthase complex-interacting multifunctional protein 2 OS=Homo sapiens OX=9606 GN=AIMP2 PE=1 SV=2	AIMP2	1266.9	1119.6	971.4	1205.9	1212.9	1450.3	1103.7	1170.8	1203.5	1094.9
AH receptor-interacting protein OS=Homo sapiens OX=9606 GN=AIP PE=1 SV=2	AIP	426.5	376.3	333.2	348.8	369.6	486.6	377.2	325.4	347.1	321.4
Adenylate kinase isoenzyme 1 OS=Homo sapiens OX=9606 GN=AK1 PE=1 SV=3	AK1	286.9	269.5	205.5	217.4	221.3	282.8	255.4	196.2	204.5	199
Adenylate kinase 2, mitochondrial OS=Homo sapiens OX=9606 GN=AK2 PE=1 SV=2	AK2	2991.4	2949.1	1969.7	2592.8	2217.1	2951.4	2135.8	2329.5	2111	1829.8
Adenylate kinase 4, mitochondrial OS=Homo sapiens OX=9606 GN=AK4 PE=1 SV=1	AK4	269.7	254.6	209.3	240.7	242.4	326.3	234.1	209	227.5	226.6
A-kinase anchor protein 1, mitochondrial OS=Homo sapiens OX=9606 GN=AKAP1 PE=1 SV=1	AKAP1	110.8	92.3	107.2	116.3	115.2	158.5	98.9	112.5	120.8	110.1
A-kinase anchor protein 12 OS=Homo sapiens OX=9606 GN=AKAP12 PE=1 SV=4	AKAP12	1699	1519.3	1209.6	1257.1	1390.1	1727.4	1220.3	1360.2	1225.5	1373.5
A-kinase anchor protein 8 OS=Homo sapiens OX=9606 GN=AKAP8 PE=1 SV=1	AKAP8	380.2	338.4	256.1	365.4	354.1	400.2	234.5	385.6	241.9	240.4
Aldo-keto reductase family 1 member B1 OS=Homo sapiens OX=9606 GN=AKR1B1 PE=1 SV=3	AKR1B1	5637.9	4901.2	3919.5	4452.8	4958.6	6229.4	4245.8	4487.7	4329.4	4260.4
Aflatoxin B1 aldehyde reductase member 2 OS=Homo sapiens OX=9606 GN=AKR7A2 PE=1 SV=3	AKR7A2	207.6	184.4	147.1	160.8	169.4	234.4	166.8	155.6	160.1	154.3
Albumin OS=Homo sapiens OX=9606 GN=ALB PE=1 SV=2	ALB	6145.6	12851.1	3958.1	3693.7	5141.6	5730.8	5352	3969.2	4397.5	7238.6
Delta-1-pyrroline-5-carboxylate synthase OS=Homo sapiens OX=9606 GN=ALDH18A1 PE=1 SV=2	ALDH18A1	2666.5	2300.9	2183.5	2556.3	2603.2	3393.7	2379.2	2472.5	2464	2496
Aldehyde dehydrogenase, mitochondrial OS=Homo sapiens OX=9606 GN=ALDH2 PE=1 SV=2	ALDH2	459.4	366.5	348.4	373.9	392.8	524.9	350.5	410.4	369.6	362.7
Aldehyde dehydrogenase family 3 member A2 OS=Homo sapiens OX=9606 GN=ALDH3A2 PE=1 SV=1	ALDH3A2	112.1	80.9	112.3	129.2	144	180.7	109.4	128.2	128.9	124.6
Alpha-aminoadipic semialdehyde dehydrogenase OS=Homo sapiens OX=9606 GN=ALDH7A1 PE=1 SV=1	ALDH7A1	1339.4	1145.4	998.7	1093	1181	1475.1	1070.9	1093.2	1083	1140.8
4-trimethylaminobutyraldehyde dehydrogenase OS=Homo sapiens OX=9606 GN=ALDH9A1 PE=1 SV=3	ALDH9A1	709.1	587.4	545.7	610.8	664	811.9	561	624.9	597.5	598.8
Fructose-bisphosphate aldolase A OS=Homo sapiens OX=9606 GN=ALDOA PE=1 SV=2	ALDOA	31130.9	27236.4	23439.2	27266.7	28056.1	32940	25327.8	26135.3	25950.6	24485.4
Fructose-bisphosphate aldolase C OS=Homo sapiens OX=9606 GN=ALDOC PE=1 SV=2	ALDOC	2823.2	2529.7	2157.2	1980.5	2210.9	2828.8	2530.1	1992.4	2691.7	2458.5
RNA demethylase ALKBH5 OS=Homo sapiens OX=9606 GN=ALKBH5 PE=1 SV=2	ALKBH5	244.7	221.7	231.5	280.2	267.9	284	233	248.5	252.1	226.5
THO complex subunit 4 OS=Homo sapiens OX=9606 GN=ALYREF PE=1 SV=1	ALYREF	1762.5	1609.9	1630.3	2044.1	1979.8	2287.6	1521	1779.5	1868.9	1899
Angiomotin OS=Homo sapiens OX=9606 GN=AMOT PE=1 SV=1	AMOT	159.5	218.6	212.9	332	287.9	278.1	188.4	288.7	276.3	274.5
Anaphase-promoting complex subunit 7 OS=Homo sapiens OX=9606 GN=ANAPC7 PE=1 SV=4	ANAPC7	10.5	10.3	6	9.8	14.3	12.6	8.7	10.5	13.6	10.7
Rabankyrin-5 OS=Homo sapiens OX=9606 GN=ANKFY1 PE=1 SV=2	ANKFY1	13.9	15.1	10.7	14.6	8.7	16.3	12.6	10.8	11	9.7
Ankyrin repeat and KH domain-containing protein 1 (Fragment) OS=Homo sapiens OX=9606 GN=ANKHD1 PE=1 SV=1	ANKHD1	77.8	65.6	57.8	76.3	72.9	92.8	62.9	70.5	66.2	66.6
Ankyrin repeat and LEM domain-containing protein 2 (Fragment) OS=Homo sapiens OX=9606 GN=ANKLE2 PE=1 SV=1	ANKLE2	39.8	29.2	31.2	38.7	39.2	50.2	34.6	33.6	42.6	39.9
Acidic leucine-rich nuclear phosphoprotein 32 family member A OS=Homo sapiens OX=9606 GN=ANP32A PE=1 SV=1	ANP32A	753.8	704.1	586.2	712.1	621.2	737.9	559.7	647	664.2	541.1
Acidic leucine-rich nuclear phosphoprotein 32 family member B OS=Homo sapiens OX=9606 GN=ANP32B PE=1 SV=1	ANP32B	3184.6	2899.4	2238.2	2799.4	2763.5	3413.5	2460.4	2616.2	2628.7	2343.9
Acidic leucine-rich nuclear phosphoprotein 32 family member E OS=Homo sapiens OX=9606 GN=ANP32E PE=1 SV=1	ANP32E	1693.7	1541.9	1425.5	1717.1	1681.5	1835.3	1420.9	1650.3	1547.6	1484.8
Annexin (Fragment) OS=Homo sapiens OX=9606 GN=ANXA1 PE=1 SV=1	ANXA1	1011.7	893.7	655.4	962.4	1061.7	1091.3	814.7	967.4	974.8	993.8
Annexin A11 OS=Homo sapiens OX=9606 GN=ANXA11 PE=1 SV=1	ANXA11	667.9	569.6	491.1	565.5	609.6	727.2	545.5	578.3	612.2	535.7
Annexin A2 OS=Homo sapiens OX=9606 GN=ANXA2 PE=1 SV=2	ANXA2	5127.4	4695.7	3671.3	4265	4610.9	5580.4	3974.9	4304.8	4559.8	4467.6
Annexin A5 OS=Homo sapiens OX=9606 GN=ANXA5 PE=1 SV=2	ANXA5	12634.7	11205.3	8955.6	10282.4	11271.5	13390.4	10025.1	10131.9	10607.7	10089.3
Annexin A6 OS=Homo sapiens OX=9606 GN=ANXA6 PE=1 SV=3	ANXA6	7400.5	6386.1	5520.8	6598.1	7158.8	8518.1	6345.4	6603.4	6605.4	6234.5
Annexin A7 OS=Homo sapiens OX=9606 GN=ANXA7 PE=1 SV=3	ANXA7	35.4	35.9	26.1	32.4	33.5	38.1	25.5	30.4	31.3	23.9
AP-1 complex subunit beta-1 OS=Homo sapiens OX=9606 GN=AP1B1 PE=1 SV=2	AP1B1	188.3	184	122.8	154.7	150.2	188	137.8	142.7	136.3	136.7
AP-1 complex subunit mu-1 OS=Homo sapiens OX=9606 GN=AP1M1 PE=1 SV=1	AP1M1	157.8	112.8	104.4	124.2	140.5	174.9	113.9	118.2	117.7	118
AP-2 complex subunit alpha-2 (Fragment) OS=Homo sapiens OX=9606 GN=AP2A2 PE=1 SV=1	AP2A2	1045.6	910.7	833.6	939.7	978.4	1233.6	903.7	932.1	1004.9	919
AP-2 complex subunit beta OS=Homo sapiens OX=9606 GN=AP2B1 PE=1 SV=1	AP2B1	1519.2	1340.6	1164.2	1323.3	1440.7	1759.9	1254.3	1385.8	1305.4	1338.7
AP-2 complex subunit mu OS=Homo sapiens OX=9606 GN=AP2M1 PE=1 SV=2	AP2M1	106	84.4	76.3	101.2	89.2	141.3	93.5	96.3	98	100.9
AP complex subunit sigma OS=Homo sapiens OX=9606 GN=AP2S1 PE=1 SV=1	AP2S1	353.1	320.2	322.1	387.9	386.7	433.4	341.2	375.6	389.2	359.8
AP-3 complex subunit beta-1 OS=Homo sapiens OX=9606 GN=AP3B1 PE=1 SV=3	AP3B1	33.2	24.9	23.7	26.6	30	31.6	26	30.9	27.9	24.3
AP-3 complex subunit delta-1 OS=Homo sapiens OX=9606 GN=AP3D1 PE=1 SV=1	AP3D1	355.5	266.3	293.3	371.7	369.9	467.6	308.2	350.3	314.5	333.3
DNA-(apurinic or apyrimidinic site) endonuclease OS=Homo sapiens OX=9606 GN=APEX1 PE=1 SV=2	APEX1	2444.2	2014.9	1986.2	2544.1	2655.5	2915.2	2182	2455.2	2488.4	2404.4
Apoptosis inhibitor 5 OS=Homo sapiens OX=9606 GN=API5 PE=1 SV=3	API5	1862.1	1656.2	1492.7	1778	1915.2	2201	1621.9	1736.7	1749.6	1726.5
Methylthioribulose-1-phosphate dehydratase OS=Homo sapiens OX=9606 GN=APIP PE=1 SV=1	APIP	209.2	181.8	167.8	167.9	166	239.8	164	184.8	165.5	157.4
Adipocyte plasma membrane-associated protein OS=Homo sapiens OX=9606 GN=APMAP PE=1 SV=2	APMAP	215.4	174.1	214.2	225.3	236.9	326.1	184.9	240.8	250.6	230.8
DCC-interacting protein 13-alpha OS=Homo sapiens OX=9606 GN=APPL1 PE=1 SV=1	APPL1	105.9	88.4	80.4	80.6	86.3	112.5	84.9	86.8	90.2	79.8
Adenine phosphoribosyltransferase OS=Homo sapiens OX=9606 GN=APRT PE=1 SV=2	APRT	329.3	313	221.9	290	276.9	334.6	244	254.9	267.3	242.5
Coatomer subunit delta OS=Homo sapiens OX=9606 GN=ARCN1 PE=1 SV=1	ARCN1	4295.2	3660.2	3259	3806.9	4039.9	4923	3744.5	3828	3783.9	3841.7
ADP-ribosylation factor 3 OS=Homo sapiens OX=9606 GN=ARF3 PE=1 SV=2	ARF3	2926.3	2565.3	2135	2494.6	2707.8	3298	2314	2489.7	2535.4	2465.1
ADP-ribosylation factor 4 OS=Homo sapiens OX=9606 GN=ARF4 PE=1 SV=3	ARF4	1484.1	1317.4	1096	1262.3	1364.7	1656.8	1273.6	1236.7	1329.1	1253.6
ADP-ribosylation factor 5 OS=Homo sapiens OX=9606 GN=ARF5 PE=1 SV=2	ARF5	564	468.7	384.6	383	445	588	444	402.1	436.4	373.2
ADP-ribosylation factor GTPase-activating protein 1 OS=Homo sapiens OX=9606 GN=ARFGAP1 PE=1 SV=2	ARFGAP1	140.7	116.7	89.9	104.3	122.9	136.1	108.3	99.7	117.4	103.6
ADP-ribosylation factor GTPase-activating protein 2 OS=Homo sapiens OX=9606 GN=ARFGAP2 PE=1 SV=1	ARFGAP2	183.3	145.1	133.7	159.6	194.3	188.6	150.6	170.6	185.6	171.4
Arfaptin-1 OS=Homo sapiens OX=9606 GN=ARFIP1 PE=1 SV=2	ARFIP1	511.5	454.4	380	436.5	443	590.3	405.8	424.9	437.1	393.4
Arfaptin-2 OS=Homo sapiens OX=9606 GN=ARFIP2 PE=1 SV=1	ARFIP2	24.6	21.4	12.3	20.7	19.4	22.7	21.9	22.3	17.3	17.3
Rho GTPase-activating protein 1 (Fragment) OS=Homo sapiens OX=9606 GN=ARHGAP1 PE=1 SV=1	ARHGAP1	52.4	48.5	37.9	52.3	46.7	67.8	39.5	48.5	46.6	42.3
Rho GTPase-activating protein 17 OS=Homo sapiens OX=9606 GN=ARHGAP17 PE=1 SV=1	ARHGAP17	36.4	30.9	31.5	24.9	33.5	44.9	23.5	32.9	31	34.6
Rho GDP-dissociation inhibitor 1 OS=Homo sapiens OX=9606 GN=ARHGDIA PE=1 SV=3	ARHGDIA	5140.7	4458.8	3767.5	3964.4	4307.6	5577.4	4165.7	3917.5	4197.4	4006.8
ADP-ribosylation factor-like protein 1 OS=Homo sapiens OX=9606 GN=ARL1 PE=1 SV=1	ARL1	48.5	46.4	50.6	60.1	64.6	80	43.9	62.9	54.1	51.7
ADP-ribosylation factor-like protein 2 OS=Homo sapiens OX=9606 GN=ARL2 PE=1 SV=4	ARL2	19.6	20.3	13.4	20	20.3	20.9	16	15.4	16.2	15.5
ADP-ribosylation factor-like protein 3 OS=Homo sapiens OX=9606 GN=ARL3 PE=1 SV=2	ARL3	140.7	111.2	84.8	117.7	99.6	138.4	98.9	100	95.2	81
PRA1 family protein 3 OS=Homo sapiens OX=9606 GN=ARL6IP5 PE=1 SV=1	ARL6IP5	533.3	423.5	549.6	660.4	672.2	846.2	465.5	641.9	724.6	597
Armadillo repeat-containing protein 6 OS=Homo sapiens OX=9606 GN=ARMC6 PE=1 SV=2	ARMC6	464.5	383.1	335.3	388.5	423	543.1	380.3	413.2	413.6	399.7
Damage-control phosphatase ARMT1 OS=Homo sapiens OX=9606 GN=ARMT1 PE=1 SV=1	ARMT1	910	806.7	709.1	814.5	861.3	1102	793.7	815.4	804.6	754.4
Actin-related protein 2/3 complex subunit 2 OS=Homo sapiens OX=9606 GN=ARPC2 PE=1 SV=1	ARPC2	253.6	235.9	195.1	253.5	249.7	331.3	214.1	237.9	250.7	239.6
Actin-related protein 2/3 complex subunit 3 OS=Homo sapiens OX=9606 GN=ARPC3 PE=1 SV=3	ARPC3	527.8	477.7	390.2	493.2	495.7	657.3	396.1	556	387.2	396.1
Actin-related protein 2/3 complex subunit 4 OS=Homo sapiens OX=9606 GN=ARPC4 PE=1 SV=3	ARPC4	815.4	725.7	656.6	760.9	823.1	966.1	676.9	718.4	746.8	714.9
cAMP-regulated phosphoprotein 19 OS=Homo sapiens OX=9606 GN=ARPP19 PE=1 SV=1	ARPP19	166.6	142	162.1	189.9	170.2	169.9	154.8	157.9	170.1	166.4
Beta-arrestin-2 OS=Homo sapiens OX=9606 GN=ARRB2 PE=1 SV=1	ARRB2	101.3	79.4	82.9	87.2	93.1	113.2	74.5	85.9	89.8	84.3
Activating signal cointegrator 1 complex subunit 2 OS=Homo sapiens OX=9606 GN=ASCC2 PE=1 SV=3	ASCC2	49.7	31.9	36.3	43.2	44.8	56.4	41	36.5	37.4	47.3
Activating signal cointegrator 1 complex subunit 3 OS=Homo sapiens OX=9606 GN=ASCC3 PE=1 SV=3	ASCC3	35	29.3	32	28.8	40.5	38.2	34.8	33.5	36.4	39.3
Set1/Ash2 histone methyltransferase complex subunit ASH2 OS=Homo sapiens OX=9606 GN=ASH2L PE=1 SV=1	ASH2L	39.7	42.3	37	44.5	43.6	58.3	45.3	42.4	48.8	48.2
Asparagine synthetase [glutamine-hydrolyzing] OS=Homo sapiens OX=9606 GN=ASNS PE=1 SV=4	ASNS	1273.1	1053	1011	1291	1382.8	1500.6	1090.9	1285.2	1371.4	1320.4
ATPase family AAA domain-containing protein 3A OS=Homo sapiens OX=9606 GN=ATAD3A PE=1 SV=2	ATAD3A	1426.9	1145.8	1354	1479.3	1505.2	1964.6	1266.5	1429.1	1507.4	1412.2
ATPase family AAA domain-containing protein 3B OS=Homo sapiens OX=9606 GN=ATAD3B PE=1 SV=1	ATAD3B	737.2	535.6	719.5	695.2	720.7	1073.1	674.6	734.5	687	703.2
Ubiquitin-like-conjugating enzyme ATG3 OS=Homo sapiens OX=9606 GN=ATG3 PE=1 SV=1	ATG3	167.1	141.9	116	139.2	145	186.4	141.5	130.3	128.6	140.9
Bifunctional purine biosynthesis protein ATIC OS=Homo sapiens OX=9606 GN=ATIC PE=1 SV=3	ATIC	6990.6	6074	5249.9	6987.5	7341.6	8170.6	5879.1	6925.2	6774.4	6464.1
Copper transport protein ATOX1 OS=Homo sapiens OX=9606 GN=ATOX1 PE=1 SV=1	ATOX1	818.6	816.3	685.3	824.4	716.5	909	691	764.5	741.8	699.7
Sodium/potassium-transporting ATPase subunit alpha-1 OS=Homo sapiens OX=9606 GN=ATP1A1 PE=1 SV=1	ATP1A1	11247.4	9683.8	10056.2	10894.6	11152.5	14837.9	9209.7	10896.7	10741.2	10485.5
Sodium/potassium-transporting ATPase subunit beta-3 OS=Homo sapiens OX=9606 GN=ATP1B3 PE=1 SV=1	ATP1B3	2008.9	1743.1	1818.8	1859.2	1980.6	2668.2	1677.6	1838	1968.7	1936.5
Endoplasmic reticulum class 1/2 Ca(2+) ATPase (Fragment) OS=Homo sapiens OX=9606 GN=ATP2A2 PE=1 SV=1	ATP2A2	382.8	265.5	447.2	472.8	497.7	673.6	337.5	485.2	483.9	455.3
ATP synthase subunit alpha, mitochondrial OS=Homo sapiens OX=9606 GN=ATP5F1A PE=1 SV=1	ATP5F1A	21128.3	19158.1	17145.9	19988.5	20431.9	24874.5	17914.2	19486.3	19279.7	17690
ATP synthase subunit beta, mitochondrial OS=Homo sapiens OX=9606 GN=ATP5F1B PE=1 SV=3	ATP5F1B	14962.4	13911.3	12101.2	13394.9	13586.4	17373.2	12724.4	13000.8	13537.6	12347.7
ATP synthase subunit gamma, mitochondrial OS=Homo sapiens OX=9606 GN=ATP5F1C PE=1 SV=1	ATP5F1C	2210.7	1808.5	1917.3	2330.3	2261.6	2974.5	2019.1	2375.1	2135	2179.8
ATP synthase subunit delta, mitochondrial OS=Homo sapiens OX=9606 GN=ATP5F1D PE=1 SV=2	ATP5F1D	915.2	855.7	718.3	774.9	742.2	959.7	695.9	722	730.8	699.2
ATP synthase subunit epsilon-like protein, mitochondrial OS=Homo sapiens OX=9606 GN=ATP5F1EP2 PE=1 SV=1	ATP5F1EP2	121.2	126.8	107	115.4	113.2	130.7	103.9	112.6	117.9	108.8
ATPase inhibitor, mitochondrial OS=Homo sapiens OX=9606 GN=ATP5IF1 PE=1 SV=1	ATP5IF1	1561	1508	1360.5	1442.3	1426	1673	1281.6	1401.6	1313.1	1348.1
ATP synthase F(0) complex subunit C1, mitochondrial OS=Homo sapiens OX=9606 GN=ATP5MC1 PE=1 SV=2	ATP5MC1	896.7	688	1176.7	1201.5	1219.7	1724.8	768.2	1213.6	1317.9	1174.8
ATP synthase membrane subunit DAPIT, mitochondrial OS=Homo sapiens OX=9606 GN=ATP5MD PE=1 SV=1	ATP5MD	1201.1	860.4	1298.9	1340.2	1439.2	1945.8	1001.7	1359.2	1413.5	1270.1
ATP synthase subunit e, mitochondrial OS=Homo sapiens OX=9606 GN=ATP5ME PE=1 SV=2	ATP5ME	575.1	456.3	560.7	637.3	592.4	797.9	447.7	607.8	644.3	517.5
ATP5MF-PTCD1 readthrough OS=Homo sapiens OX=9606 GN=ATP5MF-PTCD1 PE=4 SV=1	ATP5MF-PTCD1	8.7	6.9	11	9.4	8.3	14.1	8.8	11.9	11.5	13.3
ATP synthase F(0) complex subunit B1, mitochondrial OS=Homo sapiens OX=9606 GN=ATP5PB PE=1 SV=2	ATP5PB	625.1	482.3	675.2	731.1	779.6	1085	513.5	778.2	720.8	766.1
ATP synthase subunit d, mitochondrial OS=Homo sapiens OX=9606 GN=ATP5PD PE=1 SV=3	ATP5PD	644.9	596.4	683.5	813.5	706.7	944.7	459	757.2	689.2	653.4
ATP synthase-coupling factor 6, mitochondrial OS=Homo sapiens OX=9606 GN=ATP5PF PE=1 SV=1	ATP5PF	867	721	929	962.7	885.7	1076	786.2	940.8	1012.1	892.9
ATP synthase subunit O, mitochondrial OS=Homo sapiens OX=9606 GN=ATP5PO PE=1 SV=1	ATP5PO	1864.8	1737.6	1482.6	1659.9	1748.5	2100.1	1600.6	1656.7	1812.1	1587.3
V-type proton ATPase subunit a OS=Homo sapiens OX=9606 GN=ATP6V0A1 PE=1 SV=1	ATP6V0A1	176.3	159.1	168.7	207	188.8	231.4	149.7	185	190.7	164.5
V-type proton ATPase subunit OS=Homo sapiens OX=9606 GN=ATP6V0D1 PE=1 SV=1	ATP6V0D1	134.6	106.1	100.7	113.2	107.3	149	104.5	112.3	108.8	101.7
V-type proton ATPase catalytic subunit A OS=Homo sapiens OX=9606 GN=ATP6V1A PE=1 SV=2	ATP6V1A	879.2	748.1	657.3	779.5	817.1	1015	729.9	785	709.6	710.2
V-type proton ATPase subunit B, brain isoform OS=Homo sapiens OX=9606 GN=ATP6V1B2 PE=1 SV=3	ATP6V1B2	543.7	471.7	450.3	552	530.5	622.3	491.1	465.5	546.3	472.2
V-type proton ATPase subunit C 1 OS=Homo sapiens OX=9606 GN=ATP6V1C1 PE=1 SV=4	ATP6V1C1	1405.7	1191.2	1030.9	1147.5	1246.2	1570.6	1096.1	1170.8	1074.5	1052.6
V-type proton ATPase subunit D OS=Homo sapiens OX=9606 GN=ATP6V1D PE=1 SV=1	ATP6V1D	47.1	31.6	35.1	42.9	37.8	46.8	43.8	45.7	43.3	37.9
V-type proton ATPase subunit E 1 OS=Homo sapiens OX=9606 GN=ATP6V1E1 PE=1 SV=1	ATP6V1E1	344.7	324.3	271.6	326.9	309.4	396.2	293.6	275.3	316.4	272.7
V-type proton ATPase subunit G 1 OS=Homo sapiens OX=9606 GN=ATP6V1G1 PE=1 SV=3	ATP6V1G1	53	42.1	37.7	49.7	36.7	46.1	46.7	43.1	51	43.6
V-type proton ATPase subunit H OS=Homo sapiens OX=9606 GN=ATP6V1H PE=1 SV=1	ATP6V1H	166.9	143.1	133.5	148.3	140.7	183.1	134.8	126.2	143.5	142.3
Ataxin-10 OS=Homo sapiens OX=9606 GN=ATXN10 PE=1 SV=1	ATXN10	1234.3	1093.9	936.8	1213.2	1262.5	1459.4	1009.5	1176.7	1122.5	1036.1
Ataxin-2-like protein OS=Homo sapiens OX=9606 GN=ATXN2L PE=1 SV=2	ATXN2L	1161	1047.5	852.9	1049.4	1029.5	1246.7	869.3	985.7	834.6	918.3
BRISC and BRCA1-A complex member 1 (Fragment) OS=Homo sapiens OX=9606 GN=BABAM1 PE=1 SV=1	BABAM1	85.4	75.4	70.7	89.3	80.5	96.2	68.3	84	89.5	81.4
BAG family molecular chaperone regulator 2 OS=Homo sapiens OX=9606 GN=BAG2 PE=1 SV=1	BAG2	113.2	96.5	71.7	81.9	94.9	103.8	80.5	79.4	89.6	81.1
BAG family molecular chaperone regulator 3 OS=Homo sapiens OX=9606 GN=BAG3 PE=1 SV=3	BAG3	23.3	15	14.5	16.9	15.3	23.1	15.1	16.5	15.6	13.4
BCL2-associated athanogene 6 OS=Homo sapiens OX=9606 GN=BAG6 PE=1 SV=1	BAG6	272.8	226.7	196.1	221.4	233.2	285	210.9	212.3	227.9	210.7
Barrier-to-autointegration factor OS=Homo sapiens OX=9606 GN=BANF1 PE=1 SV=1	BANF1	3221.4	3182.3	2467.3	2784.1	2566.3	3367	2437.8	2599.8	2435.5	2395.7
Brain acid soluble protein 1 OS=Homo sapiens OX=9606 GN=BASP1 PE=1 SV=2	BASP1	11104.4	10089.8	9615.6	9318.6	10218.8	13099.2	9056.2	9615.5	9354.1	10379.5
B-cell receptor-associated protein 31 OS=Homo sapiens OX=9606 GN=BCAP31 PE=1 SV=3	BCAP31	1984.4	1491.4	2038.9	2153.2	2417.2	3041.8	1607.3	2309.4	2350.8	2169.9
Pre-mRNA-splicing factor SPF27 OS=Homo sapiens OX=9606 GN=BCAS2 PE=1 SV=1	BCAS2	637.6	573.6	464.3	531.6	541.7	685	517.7	523.7	515.7	468.5
Branched-chain-amino-acid aminotransferase OS=Homo sapiens OX=9606 GN=BCAT2 PE=1 SV=1	BCAT2	35.9	29.5	26.7	28.6	32.4	37.2	29	25.6	29.5	26.6
BRCA2 and CDKN1A-interacting protein OS=Homo sapiens OX=9606 GN=BCCIP PE=1 SV=1	BCCIP	345.8	271.2	260.8	293.5	337.6	392.5	291.6	289.1	305.7	304.4
Bcl-2-associated transcription factor 1 OS=Homo sapiens OX=9606 GN=BCLAF1 PE=1 SV=2	BCLAF1	4804.6	4426.4	4077.5	4551.1	4435.8	5447.7	4189.3	4399	4108.9	4300.4
BH3-interacting domain death agonist OS=Homo sapiens OX=9606 GN=BID PE=1 SV=1	BID	53.8	54	46.4	52	47.7	59	45.3	42.8	48.7	42.5
Baculoviral IAP repeat-containing protein 6 OS=Homo sapiens OX=9606 GN=BIRC6 PE=1 SV=2	BIRC6	14.8	13.6	10.8	16.4	22.9	16.8	14.6	15.2	14	18.1
Bleomycin hydrolase OS=Homo sapiens OX=9606 GN=BLMH PE=1 SV=1	BLMH	2481.6	2145.8	1857.7	2143.8	2353.9	2857.2	2078.7	2249.8	2144.1	2185
Biliverdin reductase A OS=Homo sapiens OX=9606 GN=BLVRA PE=1 SV=2	BLVRA	425.7	362.2	338.6	365.7	405.5	529.2	361.4	366.4	356	371.1
Biorientation of chromosomes in cell division protein 1-like 1 OS=Homo sapiens OX=9606 GN=BOD1L1 PE=1 SV=2	BOD1L1	150.9	125.9	108.3	137.9	132.3	147.6	125.7	129.3	135.5	128.7
BolA-like protein 2 OS=Homo sapiens OX=9606 GN=BOLA2 PE=1 SV=1	BOLA2	1799.6	1715.6	1393.1	1670.8	1547.3	1820.7	1413.4	1525.8	1524.9	1349
Ribosome biogenesis protein BOP1 OS=Homo sapiens OX=9606 GN=BOP1 PE=1 SV=2	BOP1	623.4	549.2	482.7	633.9	669.6	741.8	550.7	618	577.7	562
BRCA1-associated ATM activator 1 OS=Homo sapiens OX=9606 GN=BRAT1 PE=1 SV=2	BRAT1	64	51	44.8	66.3	64.6	82.6	59.3	57.7	69.2	60.5
Bromodomain-containing protein 2 (Fragment) OS=Homo sapiens OX=9606 GN=BRD2 PE=1 SV=1	BRD2	190.4	149.9	140.4	182.4	186.2	218.1	153.3	172.8	175.2	154
Bromodomain-containing protein 3 OS=Homo sapiens OX=9606 GN=BRD3 PE=1 SV=1	BRD3	24.6	22.3	20.4	24.1	26.7	22.4	19	20	21.6	19.7
Basigin (Fragment) OS=Homo sapiens OX=9606 GN=BSG PE=1 SV=1	BSG	3892	3278.2	3620.7	3986.9	3932	5129.4	3179.4	3865.3	3685.4	3770.1
Transcription factor BTF3 (Fragment) OS=Homo sapiens OX=9606 GN=BTF3 PE=1 SV=3	BTF3	218.5	222.5	228.9	244.5	213.5	250	215.2	230.9	255.7	228.5
Transcription factor BTF3 OS=Homo sapiens OX=9606 GN=BTF3 PE=1 SV=1	BTF3	1798.5	1523.7	1251.5	1603.9	1668.3	1960.3	1279.2	1721.7	1379.5	1477.1
Transcription factor BTF3 homolog 4 OS=Homo sapiens OX=9606 GN=BTF3L4 PE=1 SV=1	BTF3L4	487.6	423.2	353.5	437	464.4	544	344	452.8	334	357.6
Mitotic checkpoint protein BUB3 OS=Homo sapiens OX=9606 GN=BUB3 PE=1 SV=1	BUB3	4084.8	3441.8	3093.3	3869.4	3984	4601.6	3455.7	3778.4	3646.1	3521.5
Probable 18S rRNA (guanine-N(7))-methyltransferase (Fragment) OS=Homo sapiens OX=9606 GN=BUD23 PE=1 SV=1	BUD23	66.6	48.4	49.9	55.9	71.8	79.1	56.5	60.6	65.7	54.7
Protein BUD31 homolog OS=Homo sapiens OX=9606 GN=BUD31 PE=1 SV=1	BUD31	67.9	53	57.7	70.7	67.4	83.3	64.9	55.1	63.5	57.9
Bystin OS=Homo sapiens OX=9606 GN=BYSL PE=1 SV=3	BYSL	173.2	149.4	149	170.8	182.1	207.2	154.1	167.5	172.9	164.3
Basic leucine zipper and W2 domain-containing protein 1 OS=Homo sapiens OX=9606 GN=BZW1 PE=1 SV=1	BZW1	2026.1	1702.1	1585.7	1761.5	1890.9	2353.2	1722.6	1791.8	1783	1739.9
Basic leucine zipper and W2 domain-containing protein 2 OS=Homo sapiens OX=9606 GN=BZW2 PE=1 SV=1	BZW2	82.5	67.8	59.6	75.8	89.5	101.7	78.1	81.3	83.2	75.4
Uncharacterized protein C11orf98 OS=Homo sapiens OX=9606 GN=C11orf98 PE=4 SV=2	C11orf98	14.2	14.9	13.1	17.4	17.3	21.4	13.1	13.3	12.4	16.4
UPF0449 protein C19orf25 OS=Homo sapiens OX=9606 GN=C19orf25 PE=1 SV=1	C19orf25	60.6	56.1	51	45	42.2	62.9	46.6	41.1	49	40.4
Complement component 1 Q subcomponent-binding protein, mitochondrial OS=Homo sapiens OX=9606 GN=C1QBP PE=1 SV=1	C1QBP	17828.6	16720.7	14824.3	14705.1	14602.9	19362.1	13920.1	14909.4	13827.8	13854.7
UPF0687 protein C20orf27 OS=Homo sapiens OX=9606 GN=C20orf27 PE=1 SV=3	C20orf27	1110.7	974.2	827.2	878.1	935.4	1216.2	908.5	868.4	916.6	839.5
Uncharacterized protein C7orf50 OS=Homo sapiens OX=9606 GN=C7orf50 PE=1 SV=1	C7orf50	20.5	9.6	16.7	15.8	15.8	23.9	14.5	17.3	14.9	11.8
UPF0488 protein C8orf33 OS=Homo sapiens OX=9606 GN=C8orf33 PE=1 SV=1	C8orf33	11.6	8.6	8.6	13.8	9.6	12	8.3	7.2	10.2	12.9
Telomere length and silencing protein 1 homolog OS=Homo sapiens OX=9606 GN=C9orf78 PE=1 SV=1	C9orf78	73.7	64.4	54.3	72.2	64.7	74.5	52.4	64.5	64.7	60.3
Carbonic anhydrase 2 OS=Homo sapiens OX=9606 GN=CA2 PE=1 SV=2	CA2	274.5	209.5	207.3	214.3	249.2	322.1	219.7	227.4	227.6	224.8
Calcyclin-binding protein OS=Homo sapiens OX=9606 GN=CACYBP PE=1 SV=2	CACYBP	7872	6850.5	5788.7	6238.8	6796.3	8703.3	6167.4	6225.2	6097.3	5866.4
CAD protein OS=Homo sapiens OX=9606 GN=CAD PE=1 SV=3	CAD	1371	1231.9	1044.5	1249.7	1296.8	1585.6	1194.8	1232.6	1258.8	1190.3
Cell adhesion molecule 1 OS=Homo sapiens OX=9606 GN=CADM1 PE=1 SV=2	CADM1	221.7	196.9	168.8	187	183.4	258.1	162	174.2	169.9	165.1
Caldesmon (Fragment) OS=Homo sapiens OX=9606 GN=CALD1 PE=1 SV=1	CALD1	1351.4	1179.4	1014.6	1160	1198.1	1360.5	970.8	1137.1	1022.6	1113.9
Calmodulin-3 OS=Homo sapiens OX=9606 GN=CALM3 PE=1 SV=1	CALM3	11073.9	9708.3	9132.3	8456.3	9312.8	11439	8980	8879	8588.8	9375.2
Calreticulin OS=Homo sapiens OX=9606 GN=CALR PE=1 SV=1	CALR	11308.5	10449.8	8876.7	9102.3	9183.2	12274.1	8826.2	9323.5	8327.9	8639.9
Calumenin OS=Homo sapiens OX=9606 GN=CALU PE=1 SV=2	CALU	5208.7	4750.2	4065.9	4119.4	4162.7	5597.6	3869.3	4097.7	3345.8	3781.9
Cullin-associated NEDD8-dissociated protein 1 OS=Homo sapiens OX=9606 GN=CAND1 PE=1 SV=2	CAND1	13027.2	11027.3	9719.5	10773.9	11619	14863.8	11001.5	10685	10760	10639.3
Calnexin OS=Homo sapiens OX=9606 GN=CANX PE=1 SV=2	CANX	7199.2	5154	8074.5	9549.3	9808.2	12800.4	5790.8	9742.1	9530.4	8426
Adenylyl cyclase-associated protein 1 (Fragment) OS=Homo sapiens OX=9606 GN=CAP1 PE=1 SV=8	CAP1	183.1	159.2	137.1	152.3	162.1	201.5	143.8	148.3	156.1	144.2
Adenylyl cyclase-associated protein 1 OS=Homo sapiens OX=9606 GN=CAP1 PE=1 SV=5	CAP1	7108.7	6184.1	5216.2	5692.3	6240	8140.3	5753.6	5806.1	5570.4	5763.3
Calpain-1 catalytic subunit OS=Homo sapiens OX=9606 GN=CAPN1 PE=1 SV=1	CAPN1	165.5	136.3	136.1	167.7	171.9	219.4	148.5	163.1	164.1	149.3
Calpain-2 catalytic subunit OS=Homo sapiens OX=9606 GN=CAPN2 PE=1 SV=6	CAPN2	1553.5	1377.1	1414.2	1729.8	1527.3	1629.4	1287.7	1501.6	1485.1	1363.6
Calpain small subunit 1 OS=Homo sapiens OX=9606 GN=CAPNS1 PE=1 SV=1	CAPNS1	254.9	231.4	180.7	234.9	238.6	280.7	199.3	204.3	215.2	204.7
Caprin-1 OS=Homo sapiens OX=9606 GN=CAPRIN1 PE=1 SV=2	CAPRIN1	3263.5	2966.5	2598.9	3017	2963.4	3377.4	2589.3	2837.3	2708.9	2864.1
F-actin-capping protein subunit alpha-1 OS=Homo sapiens OX=9606 GN=CAPZA1 PE=1 SV=3	CAPZA1	2744.2	2487.9	2044	2435.5	2535.9	3032	2316.9	2441.7	2325.8	2354.5
F-actin-capping protein subunit alpha-2 OS=Homo sapiens OX=9606 GN=CAPZA2 PE=1 SV=3	CAPZA2	105.7	91.5	82.1	95.1	105.2	114.1	91.8	97.3	99.6	83.8
F-actin-capping protein subunit beta OS=Homo sapiens OX=9606 GN=CAPZB PE=1 SV=1	CAPZB	4524.4	4047.1	3431.4	3950.7	4248.2	5023.3	3667.1	3882.7	3838.5	3741.5
Calcium-regulated heat-stable protein 1 (Fragment) OS=Homo sapiens OX=9606 GN=CARHSP1 PE=1 SV=8	CARHSP1	351.3	295.6	272.7	286.2	263.7	353.5	264.5	253.5	229.6	221.5
Cysteinyl-tRNA synthetase OS=Homo sapiens OX=9606 GN=CARS1 PE=1 SV=1	CARS1	684.3	542.1	531.8	669.6	700.7	829	611.7	689.6	662.5	633.9
Caspase-3 (Fragment) OS=Homo sapiens OX=9606 GN=CASP3 PE=1 SV=2	CASP3	361.4	321.7	295.1	360.6	355.3	399.3	312.3	332.3	339.2	310.5
Caspase-7 (Fragment) OS=Homo sapiens OX=9606 GN=CASP7 PE=1 SV=1	CASP7	14.5	16.4	14.9	21.9	17.4	25.4	18.7	15.1	14.5	16.5
Calpastatin OS=Homo sapiens OX=9606 GN=CAST PE=4 SV=1	CAST	1907.5	1601.6	1471.9	1512.4	1523.9	1972.1	1400.7	1500.2	1360.2	1479.9
Catalase OS=Homo sapiens OX=9606 GN=CAT PE=1 SV=3	CAT	41.2	35.7	30.3	37	32.7	45.3	27.9	30.7	33.1	31.1
Core-binding factor subunit beta OS=Homo sapiens OX=9606 GN=CBFB PE=1 SV=1	CBFB	96.6	77.8	82.8	95.5	93	119	70.3	81.7	103.6	70.3
Carbonyl reductase [NADPH] 1 OS=Homo sapiens OX=9606 GN=CBR1 PE=1 SV=3	CBR1	4366.2	3705.7	3219.7	3343.6	3689.2	4851.8	3497.5	3328.5	3613.9	3346.1
Chromobox protein homolog 1 (Fragment) OS=Homo sapiens OX=9606 GN=CBX1 PE=1 SV=8	CBX1	553.2	485.9	432.2	501.4	510.2	602.7	426.6	516.4	465.3	494.6
Chromobox protein homolog 3 OS=Homo sapiens OX=9606 GN=CBX3 PE=1 SV=4	CBX3	7510.5	6759.7	6229.6	6438.2	6309	7820.3	6043.2	6320.4	6016.7	6207.1
Chromobox protein homolog 5 OS=Homo sapiens OX=9606 GN=CBX5 PE=1 SV=1	CBX5	887.2	770.5	780.5	819.3	830.5	960.9	755.3	837	780.9	787.9
Cell division cycle and apoptosis regulator protein 1 (Fragment) OS=Homo sapiens OX=9606 GN=CCAR1 PE=1 SV=1	CCAR1	45.9	43.7	31.4	34.9	45.4	59	38.3	42.7	44.1	47.2
Cell cycle and apoptosis regulator protein 2 OS=Homo sapiens OX=9606 GN=CCAR2 PE=1 SV=2	CCAR2	2543.5	2357.1	1955.9	2124.6	2232.2	2981.7	2156.6	2142.2	2067.6	2127.9
Coiled-coil domain-containing protein 124 OS=Homo sapiens OX=9606 GN=CCDC124 PE=1 SV=1	CCDC124	1031.7	912.6	851.8	1054.5	973	1115	874	987.1	978.5	834.2
Coiled-coil domain-containing protein 47 OS=Homo sapiens OX=9606 GN=CCDC47 PE=1 SV=1	CCDC47	24.6	16.6	38.2	39.8	34.3	50.8	22.8	37.3	38.5	41.7
Coiled-coil domain-containing protein 58 OS=Homo sapiens OX=9606 GN=CCDC58 PE=1 SV=1	CCDC58	117.8	105.5	80.3	100.1	94.9	121.8	78.9	99.9	89.8	85.4
Coiled-coil domain-containing protein 86 OS=Homo sapiens OX=9606 GN=CCDC86 PE=1 SV=1	CCDC86	482.6	380	464.2	547.3	541.3	602.2	425.5	517.3	485.4	495.1
T-complex protein 1 subunit beta OS=Homo sapiens OX=9606 GN=CCT2 PE=1 SV=4	CCT2	27443.4	24247.4	20320.7	23640.6	24821.4	30682.8	22428.9	23102.3	23094.7	22211.1
T-complex protein 1 subunit gamma OS=Homo sapiens OX=9606 GN=CCT3 PE=1 SV=4	CCT3	34429.8	28763.6	26797	32279.4	34601.9	41319.5	29737.8	32271.8	30972.3	29471.1
T-complex protein 1 subunit delta OS=Homo sapiens OX=9606 GN=CCT4 PE=1 SV=4	CCT4	19950.3	17344.3	14752.2	17722.3	18680	22513.6	16392.8	17288.7	17121.5	16237.1
T-complex protein 1 subunit epsilon OS=Homo sapiens OX=9606 GN=CCT5 PE=1 SV=1	CCT5	22062.4	19023.8	16557.2	18571.9	19968.4	25025.3	18333.1	18934.7	18527.3	18768.3
T-complex protein 1 subunit zeta OS=Homo sapiens OX=9606 GN=CCT6A PE=1 SV=3	CCT6A	20506.8	17803.1	15256.8	17841.9	19027.2	23562.4	16919.4	17588.4	17505.3	17095.7
T-complex protein 1 subunit eta OS=Homo sapiens OX=9606 GN=CCT7 PE=1 SV=2	CCT7	24363.5	20629.2	18263	21344	22667.4	28009.9	20690.4	21476.4	21230.4	20765.8
T-complex protein 1 subunit theta OS=Homo sapiens OX=9606 GN=CCT8 PE=1 SV=4	CCT8	37298.8	32176.8	27619.9	31442.4	33907.3	42731.7	30468.8	31771.4	31487.2	30947
CD2-associated protein OS=Homo sapiens OX=9606 GN=CD2AP PE=1 SV=1	CD2AP	395.2	331.3	285.8	311	346.9	429.1	318.1	327.4	318.4	362.4
CD2 antigen cytoplasmic tail-binding protein 2 OS=Homo sapiens OX=9606 GN=CD2BP2 PE=1 SV=1	CD2BP2	171.3	154	124.3	137.4	127.9	151.6	134.4	133	121.2	128.4
CD59 glycoprotein (Fragment) OS=Homo sapiens OX=9606 GN=CD59 PE=1 SV=1	CD59	133.3	107.1	115.5	136.8	146.8	172.3	128.5	143.1	128.5	134.9
Tetraspanin (Fragment) OS=Homo sapiens OX=9606 GN=CD81 PE=1 SV=1	CD81	126.8	113	138.9	139.4	145.5	177.9	118.4	132.9	141.3	136.6
CD99 antigen OS=Homo sapiens OX=9606 GN=CD99 PE=1 SV=1	CD99	383.6	335.4	353.7	372.9	365.5	496.9	313.9	339.5	342.8	336.3
Cell division cycle protein 20 homolog OS=Homo sapiens OX=9606 GN=CDC20 PE=1 SV=2	CDC20	66.8	52.4	65.5	69.8	67.9	79.5	63.2	70.3	66.7	76.8
Hsp90 co-chaperone Cdc37 OS=Homo sapiens OX=9606 GN=CDC37 PE=1 SV=1	CDC37	5375.4	4655.8	4053.8	4678.3	4857.1	5699.7	4495.4	4546.6	4714.4	4582.6
Cell division control protein 42 homolog OS=Homo sapiens OX=9606 GN=CDC42 PE=1 SV=2	CDC42	6743.7	5393.1	6363.5	6927.3	7283.4	9353.5	5354.8	7087.7	6976.1	6960.7
Cell division cycle 5-like protein OS=Homo sapiens OX=9606 GN=CDC5L PE=1 SV=2	CDC5L	2210.9	1604.4	1815	2227.2	2260.6	2784	1952.4	2154.3	2152.2	2045.5
Cadherin-2 OS=Homo sapiens OX=9606 GN=CDH2 PE=1 SV=4	CDH2	152.8	127.9	133	139.1	146.6	170.2	116.3	135.7	134.6	124.6
Cyclin-dependent kinase 1 OS=Homo sapiens OX=9606 GN=CDK1 PE=1 SV=3	CDK1	2254.8	1834.8	1768	2106.8	2238.8	2719.6	1989.1	2059	2050.1	1926.2
Cyclin-dependent kinase 12 OS=Homo sapiens OX=9606 GN=CDK12 PE=1 SV=2	CDK12	73.7	61.6	45.3	71.3	75.8	87.6	58.2	77.3	65.8	61.9
Cyclin-dependent kinase 2 OS=Homo sapiens OX=9606 GN=CDK2 PE=1 SV=2	CDK2	325.4	286.2	260	328.5	338.3	395.7	303	310.9	311.4	315
Cyclin-dependent kinase 4 OS=Homo sapiens OX=9606 GN=CDK4 PE=1 SV=2	CDK4	70.8	67.7	70.5	68	66.6	96.7	73	73.8	65.7	66.8
Cyclin-dependent-like kinase 5 OS=Homo sapiens OX=9606 GN=CDK5 PE=1 SV=3	CDK5	60	63.1	59.4	65.1	64.7	92.2	67.7	58.7	66.2	67.5
CDK5 regulatory subunit-associated protein 3 (Fragment) OS=Homo sapiens OX=9606 GN=CDK5RAP3 PE=1 SV=1	CDK5RAP3	155	131.8	110.6	149.7	139.8	155.8	128.5	139.2	132.6	141.4
Cyclin-dependent kinase-like 5 OS=Homo sapiens OX=9606 GN=CDKL5 PE=1 SV=2	CDKL5	189.4	141.5	144.9	184.5	202.5	233.3	147	176.7	143.4	135.3
Cyclin-dependent kinase inhibitor 2A OS=Homo sapiens OX=9606 GN=CDKN2A PE=1 SV=2	CDKN2A	800.3	744.8	532.8	645.4	599.7	735.1	566.6	590	623.6	500.8
CDKN2A-interacting protein OS=Homo sapiens OX=9606 GN=CDKN2AIP PE=1 SV=3	CDKN2AIP	45.4	39.8	39.7	46.9	42.7	49.1	39	43.6	47.9	44
Protein CDV3 homolog OS=Homo sapiens OX=9606 GN=CDV3 PE=1 SV=1	CDV3	1440.2	1271.4	1268.4	1443	1398.1	1543.1	1126.1	1333.6	1229	1293.2
CUGBP Elav-like family member 1 OS=Homo sapiens OX=9606 GN=CELF1 PE=1 SV=2	CELF1	375.9	312.4	242.6	290.2	303.9	385.5	261.9	285.6	260	270
Centrosomal protein of 170 kDa OS=Homo sapiens OX=9606 GN=CEP170 PE=1 SV=1	CEP170	33.2	26.8	22.9	29.7	26.3	32.9	28.5	31.3	32.6	30.1
Centrin-2 OS=Homo sapiens OX=9606 GN=CETN2 PE=1 SV=1	CETN2	318	265.8	255.4	247.3	275	325.9	235.9	258	224.8	265.9
Cofilin, non-muscle isoform OS=Homo sapiens OX=9606 GN=CFL1 PE=1 SV=1	CFL1	32103.7	29529.9	23564.6	24883	24044.3	32185.4	23802.5	23591.1	23126.7	21939.9
Cofilin-2 OS=Homo sapiens OX=9606 GN=CFL2 PE=1 SV=1	CFL2	1040.6	915.7	724.4	815.5	868	1042.9	790.4	781.3	856.9	782.8
CGG triplet repeat-binding protein 1 OS=Homo sapiens OX=9606 GN=CGGBP1 PE=1 SV=2	CGGBP1	38.5	42	29.7	33.7	32.1	43.4	29.8	33.1	29.1	35.7
Coiled-coil-helix-coiled-coil-helix domain-containing protein 2 OS=Homo sapiens OX=9606 GN=CHCHD2 PE=1 SV=1	CHCHD2	110.1	95.4	86.2	95.7	88.7	138.4	76.7	102.3	92.5	94.6
MICOS complex subunit MIC19 OS=Homo sapiens OX=9606 GN=CHCHD3 PE=1 SV=2	CHCHD3	2064.3	1591.2	1834.3	2015.5	1928.7	2604.8	1663.3	1997.3	1987.4	1717.5
Mitochondrial intermembrane space import and assembly protein 40 OS=Homo sapiens OX=9606 GN=CHCHD4 PE=1 SV=1	CHCHD4	44.7	46.4	35.9	41.4	48.3	60.1	43.3	42.5	52.9	43.9
Chromodomain-helicase-DNA-binding protein 1 OS=Homo sapiens OX=9606 GN=CHD1 PE=1 SV=2	CHD1	39.5	33.1	38.7	49.7	44.9	62.4	45.4	44.5	43.1	45.2
DNA helicase OS=Homo sapiens OX=9606 GN=CHD4 PE=1 SV=1	CHD4	1179	879.9	892.3	1113.7	1212.1	1397.1	1035.8	1122.2	1095.5	1161.8
Calcium homeostasis endoplasmic reticulum protein OS=Homo sapiens OX=9606 GN=CHERP PE=1 SV=3	CHERP	1373.2	1204.1	968.1	1164.8	1130.9	1441.4	1118.5	1155.9	995.5	1070
Charged multivesicular body protein 2b OS=Homo sapiens OX=9606 GN=CHMP2B PE=1 SV=1	CHMP2B	166.5	148.1	115	143.7	142.9	163.3	116.1	128.1	124.7	116.2
Charged multivesicular body protein 4b OS=Homo sapiens OX=9606 GN=CHMP4B PE=1 SV=1	CHMP4B	1005.9	893.6	733.8	844.5	904.5	1034	796.7	904.5	782.5	836.6
Charged multivesicular body protein 5 OS=Homo sapiens OX=9606 GN=CHMP5 PE=1 SV=1	CHMP5	342.6	296	230.7	245.4	297.6	358.8	252.9	294.4	272.3	277.4
Cysteine and histidine-rich domain-containing protein 1 OS=Homo sapiens OX=9606 GN=CHORDC1 PE=1 SV=2	CHORDC1	5196.2	4494.5	3794	4043	4449.5	5582.2	4137.2	4194	4200.2	4331.2
Chromatin accessibility complex protein 1 OS=Homo sapiens OX=9606 GN=CHRAC1 PE=1 SV=1	CHRAC1	25.9	26.3	22.9	19	23.9	26.3	18.7	22.9	23.3	18.2
Chromatin target of PRMT1 protein OS=Homo sapiens OX=9606 GN=CHTOP PE=1 SV=1	CHTOP	121.7	130.7	87.6	129.1	124	137.3	108.1	101.5	111.3	148.6
Cytosolic iron-sulfur assembly component 2B (Fragment) OS=Homo sapiens OX=9606 GN=CIAO2B PE=1 SV=1	CIAO2B	361.2	304	269.1	386.6	368.6	360.4	283	323.3	351.3	322.6
Anamorsin OS=Homo sapiens OX=9606 GN=CIAPIN1 PE=1 SV=1	CIAPIN1	216.7	175.5	169	197.8	186	220.5	161.5	196	186.5	172
Protein CIP2A OS=Homo sapiens OX=9606 GN=CIP2A PE=1 SV=1	CIP2A	39.5	40.3	32	32	43.8	44.2	32.8	31.6	39.5	37.1
Cold-inducible RNA-binding protein OS=Homo sapiens OX=9606 GN=CIRBP PE=1 SV=1	CIRBP	721.6	628.2	511.9	634.9	638.7	763.3	493.4	653.4	536.9	543.6
CDGSH iron-sulfur domain-containing protein 2 OS=Homo sapiens OX=9606 GN=CISD2 PE=1 SV=1	CISD2	104.7	74.3	109.5	119.9	119.9	165	81	127.4	112.3	111.2
Cytoskeleton-associated protein 4 OS=Homo sapiens OX=9606 GN=CKAP4 PE=1 SV=2	CKAP4	196.3	159.3	200.9	210.4	230.6	284	148.3	209.8	236.8	215.4
Cytoskeleton-associated protein 5 OS=Homo sapiens OX=9606 GN=CKAP5 PE=1 SV=3	CKAP5	2674.3	2072.6	2244.5	2634.9	2674.9	3290.7	2384.5	2567.5	2455.7	2564.2
Creatine kinase B-type OS=Homo sapiens OX=9606 GN=CKB PE=1 SV=1	CKB	33567.1	29031.1	26328.9	31889.3	33362.9	38822.4	29103.5	30792.3	29941.6	28520.3
Creatine kinase U-type, mitochondrial OS=Homo sapiens OX=9606 GN=CKMT1A PE=1 SV=1	CKMT1A	751.9	700.3	582.4	683	716.5	896.2	671	681.1	698.1	688.2
Cyclin-dependent kinases regulatory subunit 1 OS=Homo sapiens OX=9606 GN=CKS1B PE=1 SV=1	CKS1B	88.6	77.6	78.3	94.6	98.7	87.1	73.9	91.3	78	74.5
CLIP-associating protein 1 OS=Homo sapiens OX=9606 GN=CLASP1 PE=1 SV=1	CLASP1	38.9	28.5	26.1	32.1	30.7	35.7	29.9	28.7	28.6	26.5
Chloride intracellular channel protein 1 OS=Homo sapiens OX=9606 GN=CLIC1 PE=1 SV=4	CLIC1	3838	3362	2766.4	3255.7	3522.1	4184.1	3005	3201	3304.9	3224.1
Chloride intracellular channel protein 4 OS=Homo sapiens OX=9606 GN=CLIC4 PE=1 SV=4	CLIC4	532.7	461.9	419.5	560.9	605.8	631.1	463.9	588.4	555.6	550.2
Clathrin interactor 1 OS=Homo sapiens OX=9606 GN=CLINT1 PE=1 SV=1	CLINT1	1095.8	938.9	750.7	888.2	937.5	1202.6	805	894.1	802.8	788
Ceroid-lipofuscinosis neuronal protein 6 OS=Homo sapiens OX=9606 GN=CLN6 PE=4 SV=1	CLN6	1010.2	668.6	757.1	883.3	1009.1	1208.9	910.2	907	882.7	1002.7
Methylosome subunit pICln OS=Homo sapiens OX=9606 GN=CLNS1A PE=1 SV=1	CLNS1A	93.1	77.3	70	82.3	85.3	103.8	58.9	86.9	58.2	65.4
Caseinolytic peptidase B protein homolog OS=Homo sapiens OX=9606 GN=CLPB PE=1 SV=1	CLPB	377.7	311.6	297.6	311.6	325.5	435.7	329.6	310	338.3	313.9
ATP-dependent Clp protease proteolytic subunit, mitochondrial OS=Homo sapiens OX=9606 GN=CLPP PE=1 SV=1	CLPP	99.1	113.9	73.8	85.4	81.8	97.7	90	91.8	89.7	91.6
Clathrin light chain A OS=Homo sapiens OX=9606 GN=CLTA PE=1 SV=1	CLTA	1609.8	1513.2	1331.8	1541.4	1457.4	1588	1256.2	1410.8	1406	1346.1
Clathrin light chain B OS=Homo sapiens OX=9606 GN=CLTB PE=1 SV=1	CLTB	1359.4	1239.4	1103.9	1167.1	1145.4	1358.1	1063.7	1083.8	1090.7	1131.5
Clathrin heavy chain OS=Homo sapiens OX=9606 GN=CLTC PE=1 SV=1	CLTC	15975.5	13866	12310.7	14722	15711.9	19053	13506.8	14962.8	14113.4	13820.5
Clustered mitochondria protein homolog OS=Homo sapiens OX=9606 GN=CLUH PE=1 SV=1	CLUH	159.7	149	129.2	151.5	173.6	191.5	141.9	157.5	171.3	141.9
Carboxymethylenebutenolidase homolog OS=Homo sapiens OX=9606 GN=CMBL PE=1 SV=1	CMBL	61.5	46.7	55.7	61.1	61.8	71.5	48	52.7	47.8	58.2
UMP-CMP kinase OS=Homo sapiens OX=9606 GN=CMPK1 PE=1 SV=3	CMPK1	2709	2326.7	1867.7	2439	2470.8	3059.5	1912.6	2462.8	1834.3	1799.6
Protein CMSS1 (Fragment) OS=Homo sapiens OX=9606 GN=CMSS1 PE=1 SV=1	CMSS1	81.6	62.8	59.9	61.7	75.2	91.9	63.5	78	79.3	73
Cap-specific mRNA (nucleoside-2'-O-)-methyltransferase 1 OS=Homo sapiens OX=9606 GN=CMTR1 PE=1 SV=1	CMTR1	235.2	220.3	187.2	210.3	221.2	278.5	198.5	210.6	213.3	191.9
Cellular nucleic acid-binding protein OS=Homo sapiens OX=9606 GN=CNBP PE=1 SV=1	CNBP	6348.3	5801.7	6002.9	6955.1	5991.3	6661.1	5239.9	6351.5	6233.1	6200.6
Cytosolic non-specific dipeptidase OS=Homo sapiens OX=9606 GN=CNDP2 PE=1 SV=2	CNDP2	82.9	68.2	68.8	75.2	87.8	88.2	78.3	75.3	74.3	75.8
Calponin OS=Homo sapiens OX=9606 GN=CNN2 PE=1 SV=1	CNN2	14.9	13.2	10.2	12.9	10.2	11	9.7	12	10.7	11.6
Calponin-3 OS=Homo sapiens OX=9606 GN=CNN3 PE=1 SV=1	CNN3	3416.7	3139.5	2431.1	2625.8	2660.2	3497.6	2551.5	2604.5	2561.7	2333.4
CCR4-NOT transcription complex subunit 1 OS=Homo sapiens OX=9606 GN=CNOT1 PE=1 SV=2	CNOT1	81.8	70	63	87.5	78.7	97	74.6	76.8	85.6	80.5
CCR4-NOT transcription complex subunit 3 OS=Homo sapiens OX=9606 GN=CNOT3 PE=1 SV=1	CNOT3	529.1	445.7	393.8	476.5	539.4	604.2	441.8	482.7	489.8	481.1
2',3'-cyclic-nucleotide 3'-phosphodiesterase OS=Homo sapiens OX=9606 GN=CNP PE=1 SV=2	CNP	390.4	320.1	331.8	363.6	381.2	492.9	326.2	381.9	350.1	346.6
Cytochrome c oxidase assembly factor 3 homolog, mitochondrial OS=Homo sapiens OX=9606 GN=COA3 PE=1 SV=1	COA3	599.9	473.2	628	748.5	723.2	842.1	517.1	729.7	727.8	654.2
Cytochrome c oxidase assembly factor 4 homolog, mitochondrial OS=Homo sapiens OX=9606 GN=COA4 PE=1 SV=2	COA4	614.8	548.3	552.5	642.2	612.5	662.1	529	596.2	658.6	626
Cytochrome c oxidase assembly factor 6 homolog OS=Homo sapiens OX=9606 GN=COA6 PE=1 SV=1	COA6	229.7	215.5	174.4	174.7	160.7	231.5	175.7	170.1	167	173.3
Cytochrome c oxidase assembly factor 7 OS=Homo sapiens OX=9606 GN=COA7 PE=1 SV=2	COA7	166.7	165.3	138.5	155.4	138.6	174.7	139.8	149.1	143	141.1
COMM domain-containing protein 1 (Fragment) OS=Homo sapiens OX=9606 GN=COMMD1 PE=1 SV=1	COMMD1	151.8	145.5	107.6	141.9	144.7	167.7	126.6	140	134.4	134.2
COMM domain-containing protein 4 OS=Homo sapiens OX=9606 GN=COMMD4 PE=1 SV=1	COMMD4	23.6	18.8	18.5	21.6	23.1	32.1	18.4	20.8	25.7	18.1
COMM domain-containing protein 9 OS=Homo sapiens OX=9606 GN=COMMD9 PE=1 SV=2	COMMD9	110.3	84.8	74.1	100.6	105.2	116.6	89.7	101.2	92.8	94.2
Coatomer subunit alpha OS=Homo sapiens OX=9606 GN=COPA PE=1 SV=2	COPA	2094.8	1594.9	1693.2	1958.5	2026	2605.7	1812.4	1898.5	1952.8	1847.2
Coatomer subunit beta OS=Homo sapiens OX=9606 GN=COPB1 PE=1 SV=3	COPB1	4956	4266.9	3919.6	4270.2	4603.1	5738.7	4351	4311.3	4536.2	4400.8
Coatomer subunit beta' OS=Homo sapiens OX=9606 GN=COPB2 PE=1 SV=2	COPB2	2463.4	2050.5	1814.9	2037.2	2189.1	2756.6	2061.7	2126.6	2097.2	2081.4
Coatomer subunit epsilon OS=Homo sapiens OX=9606 GN=COPE PE=1 SV=3	COPE	1289.7	1175.2	1008.6	1066.6	1143.8	1425.7	1108.8	1045.4	1094.4	1045.3
Coatomer subunit gamma-1 OS=Homo sapiens OX=9606 GN=COPG1 PE=1 SV=1	COPG1	1013.9	874.5	750.2	922.1	990.6	1118.2	835	934.9	965.1	873.4
Coatomer subunit gamma-2 OS=Homo sapiens OX=9606 GN=COPG2 PE=1 SV=1	COPG2	501.3	397.1	368.2	407.9	419.7	576.5	390.2	418.8	389.6	411
COP9 signalosome complex subunit 2 OS=Homo sapiens OX=9606 GN=COPS2 PE=1 SV=1	COPS2	97.4	76	69.5	87.5	99	108.7	79.1	96.4	73.8	82.3
COP9 signalosome complex subunit 3 OS=Homo sapiens OX=9606 GN=COPS3 PE=1 SV=3	COPS3	1323.2	1120.8	988.1	1106.9	1181.4	1520.6	1126	1118.3	1097.8	1095
COP9 signalosome complex subunit 4 OS=Homo sapiens OX=9606 GN=COPS4 PE=1 SV=1	COPS4	1178	1066.4	898	1047.7	1131.4	1351.7	955.9	1057.8	1029.5	1031.7
COP9 signalosome complex subunit 5 OS=Homo sapiens OX=9606 GN=COPS5 PE=1 SV=4	COPS5	377.5	328.1	277.1	326.5	352.3	449.1	307.8	361.6	312	339.1
COP9 signalosome complex subunit 6 OS=Homo sapiens OX=9606 GN=COPS6 PE=1 SV=1	COPS6	458.2	401.6	346.6	420.2	427.6	511	399.7	412.5	431.5	386.2
COP9 signalosome complex subunit 7a (Fragment) OS=Homo sapiens OX=9606 GN=COPS7A PE=1 SV=8	COPS7A	73.7	75.2	52.8	90.9	72.7	83.7	70.4	84.3	92.9	73
COP9 signalosome complex subunit 7b OS=Homo sapiens OX=9606 GN=COPS7B PE=1 SV=1	COPS7B	164.7	155.5	111.3	149.6	165.4	207.3	124.3	137	135.6	128.1
COP9 signalosome complex subunit 8 (Fragment) OS=Homo sapiens OX=9606 GN=COPS8 PE=1 SV=1	COPS8	964.6	912	673.3	847.5	783.7	916.4	720.1	708.8	725.9	646.3
COP9 signalosome complex subunit 9 OS=Homo sapiens OX=9606 GN=COPS9 PE=1 SV=3	COPS9	33.5	31.5	29.1	27.7	28.4	31.9	29	27.9	28.7	25.5
Coatomer subunit zeta-1 OS=Homo sapiens OX=9606 GN=COPZ1 PE=1 SV=1	COPZ1	560.7	468.3	403.6	562.5	597.3	671.7	447.3	561	457.8	437.1
Coronin-1B OS=Homo sapiens OX=9606 GN=CORO1B PE=1 SV=1	CORO1B	15.6	20	16.6	17.2	14.4	25.6	18.1	17.2	14.5	13.8
Coronin-1C OS=Homo sapiens OX=9606 GN=CORO1C PE=1 SV=1	CORO1C	1005.9	820.9	870	908.6	1016.6	1306.7	838.2	950.3	995.4	938.2
Coactosin-like protein OS=Homo sapiens OX=9606 GN=COTL1 PE=1 SV=1	COTL1	192.3	152.1	140.3	159.2	184.5	204.5	156.1	174.6	164.3	159.3
Cytochrome c oxidase copper chaperone OS=Homo sapiens OX=9606 GN=COX17 PE=1 SV=2	COX17	405.7	390.5	327.6	355.5	374	422.3	275.8	333.5	297	345.3
Cytochrome c oxidase subunit 4 isoform 1, mitochondrial OS=Homo sapiens OX=9606 GN=COX4I1 PE=1 SV=1	COX4I1	5670.7	4457.9	5966	6399.6	6344.5	8267	4733.5	6293.7	6348.6	6043.7
Cytochrome c oxidase subunit 5A, mitochondrial OS=Homo sapiens OX=9606 GN=COX5A PE=1 SV=2	COX5A	459	484.6	398.4	503.7	341.9	493.7	332.3	422.6	359.4	320.2
Cytochrome c oxidase subunit 5B, mitochondrial OS=Homo sapiens OX=9606 GN=COX5B PE=1 SV=2	COX5B	1524.4	1369	1477.2	1726	1431.1	1815.6	1179.9	1580.7	1440.2	1325.7
Cytochrome c oxidase subunit 6B1 OS=Homo sapiens OX=9606 GN=COX6B1 PE=1 SV=2	COX6B1	788.5	746	471.4	629.9	526.5	739.6	504.2	581.9	463.8	421.5
Cytochrome c oxidase subunit 7A2, mitochondrial OS=Homo sapiens OX=9606 GN=COX7A2 PE=1 SV=1	COX7A2	2367.6	1762.3	2301	2557.1	2820.6	3404.4	1993.4	2778.1	2770	2656
Cytochrome c oxidase subunit 7C, mitochondrial OS=Homo sapiens OX=9606 GN=COX7C PE=1 SV=1	COX7C	823.8	637.6	727.8	814.6	857.8	1062	603.8	835.1	880.5	773.1
Copine-1 (Fragment) OS=Homo sapiens OX=9606 GN=CPNE1 PE=1 SV=8	CPNE1	45.6	40.5	37.4	44.1	42.2	61.5	41.8	41.1	42.3	45.6
Copine-3 OS=Homo sapiens OX=9606 GN=CPNE3 PE=1 SV=1	CPNE3	2851.5	2456.6	2129.6	2161.8	2523.8	3120.1	2443.8	2304	2535.6	2481
Oxygen-dependent coproporphyrinogen-III oxidase, mitochondrial OS=Homo sapiens OX=9606 GN=CPOX PE=1 SV=3	CPOX	286	276	245.9	277.2	280.4	359	259	275.7	282	276.2
Cleavage and polyadenylation specificity factor subunit 1 OS=Homo sapiens OX=9606 GN=CPSF1 PE=1 SV=2	CPSF1	59.3	49.4	47.4	63	60	80.9	57.8	58.9	69	62.5
Cleavage and polyadenylation specificity factor subunit 6 OS=Homo sapiens OX=9606 GN=CPSF6 PE=1 SV=1	CPSF6	557.9	508.7	496.8	582.1	561.4	636.5	505.1	540.7	549.6	492
Cleavage and polyadenylation specificity factor subunit 7 OS=Homo sapiens OX=9606 GN=CPSF7 PE=1 SV=1	CPSF7	140.9	118.4	113.1	141.6	137	176.8	124.2	130.1	120.1	120.5
Carnitine O-palmitoyltransferase 2, mitochondrial OS=Homo sapiens OX=9606 GN=CPT2 PE=1 SV=2	CPT2	47	37.2	31	42.9	37.9	75.3	36.9	40.8	34.7	33.1
Cyclic AMP-responsive element-binding protein 1 OS=Homo sapiens OX=9606 GN=CREB1 PE=1 SV=3	CREB1	192	177.7	159.9	183.4	175.8	197.8	153.4	159.7	163.3	163.6
Crk-like protein OS=Homo sapiens OX=9606 GN=CRKL PE=1 SV=1	CRKL	126.3	126	94.5	117.1	108.6	128.1	101	109.7	114.1	96.8
Cartilage-associated protein OS=Homo sapiens OX=9606 GN=CRTAP PE=1 SV=1	CRTAP	43.7	37.6	40.6	44.4	48.5	60.6	49.8	46.1	46.4	42.6
Quinone oxidoreductase (Fragment) OS=Homo sapiens OX=9606 GN=CRYZ PE=1 SV=1	CRYZ	562	493.7	425.9	449.2	487.2	613.6	460.4	458.1	457.6	445.4
Citrate synthase, mitochondrial OS=Homo sapiens OX=9606 GN=CS PE=1 SV=2	CS	8867	7587.3	7604.2	7980.1	8276.8	11315.5	8029.4	7999.9	8008.2	8000.1
Cold shock domain-containing protein E1 OS=Homo sapiens OX=9606 GN=CSDE1 PE=1 SV=2	CSDE1	8012.7	6903.5	5653.5	6515.7	7048.7	8891.1	6135.4	6821.7	5851.1	6166.4
Exportin-2 OS=Homo sapiens OX=9606 GN=CSE1L PE=1 SV=3	CSE1L	12035	9771.8	9357.2	11350.9	11930.8	14389.3	10467.3	10869	10977	10865
Casein kinase I isoform alpha (Fragment) OS=Homo sapiens OX=9606 GN=CSNK1A1 PE=1 SV=1	CSNK1A1	18.6	9.5	11.3	15.2	17.6	23.8	16.1	14.2	11.9	19.5
Casein kinase II subunit alpha OS=Homo sapiens OX=9606 GN=CSNK2A1 PE=1 SV=1	CSNK2A1	2137	1690.6	1650.8	2249	2304.2	2629.3	1836.5	2170.8	2037.7	2009.2
Casein kinase II subunit alpha' (Fragment) OS=Homo sapiens OX=9606 GN=CSNK2A2 PE=1 SV=1	CSNK2A2	128.8	108.8	94.3	119.2	132.1	174.8	115.2	127	119.6	139.6
Casein kinase II subunit beta OS=Homo sapiens OX=9606 GN=CSNK2B PE=1 SV=1	CSNK2B	1159.9	972.6	853.7	1131.8	1144.1	1381.9	911.6	1133.2	980.6	917.2
Cysteine and glycine-rich protein 2 OS=Homo sapiens OX=9606 GN=CSRP2 PE=1 SV=1	CSRP2	581.2	528.1	470.4	538.4	558.7	721.2	497.8	542.6	556.1	507
Cystatin-B OS=Homo sapiens OX=9606 GN=CSTB PE=1 SV=2	CSTB	2416.4	2368.2	1705.6	1909.4	1821.1	2491.7	1695.9	1844.9	1629.9	1383
Cleavage stimulation factor subunit 2 OS=Homo sapiens OX=9606 GN=CSTF2 PE=1 SV=1	CSTF2	450	396.3	309.4	385.3	356.4	446.9	319.3	365.3	362.3	308.7
C-terminal-binding protein 2 OS=Homo sapiens OX=9606 GN=CTBP2 PE=1 SV=1	CTBP2	49	42.7	31.5	43.6	49.2	64.2	40.4	37.3	41.2	31.2
Catenin alpha-1 OS=Homo sapiens OX=9606 GN=CTNNA1 PE=1 SV=1	CTNNA1	1762.1	1544	1363.1	1592.3	1629.4	2080.1	1409	1572.1	1497.9	1527.9
Catenin beta-1 OS=Homo sapiens OX=9606 GN=CTNNB1 PE=1 SV=1	CTNNB1	167.1	148.3	124.5	161.2	155	209.1	138.5	167.5	126.3	140.5
Beta-catenin-like protein 1 OS=Homo sapiens OX=9606 GN=CTNNBL1 PE=1 SV=1	CTNNBL1	1375.3	1254.1	1052.7	1316.3	1245.5	1572.4	1144.5	1202.2	1235.9	1118.4
Catenin delta-1 OS=Homo sapiens OX=9606 GN=CTNND1 PE=1 SV=2	CTNND1	683.3	614.5	582	714.1	638.8	788.7	575.9	631.7	640.1	558.2
CTP synthase 1 OS=Homo sapiens OX=9606 GN=CTPS1 PE=1 SV=2	CTPS1	4393.8	3722.5	3427.6	4057.6	4220.9	5295.5	3878.8	3950.5	4034	3829.7
CTP synthase 2 OS=Homo sapiens OX=9606 GN=CTPS2 PE=1 SV=1	CTPS2	81.6	55.8	73	78.3	88.9	105	77.1	71.9	78	79
Cathepsin D OS=Homo sapiens OX=9606 GN=CTSD PE=1 SV=1	CTSD	2603.1	2443.3	1941.2	1984.4	2023.3	3029.9	2171.8	1850.5	2001.4	1933.5
Src substrate cortactin OS=Homo sapiens OX=9606 GN=CTTN PE=1 SV=2	CTTN	7139.4	6462.8	5486.9	5388.4	5545.3	7282.7	5389.9	5284.6	5006.6	5479.9
Cullin-1 OS=Homo sapiens OX=9606 GN=CUL1 PE=1 SV=1	CUL1	443.5	373.9	358.1	476	470.2	546.9	372	448.3	413.5	409.8
Cullin-3 OS=Homo sapiens OX=9606 GN=CUL3 PE=1 SV=2	CUL3	166.4	162	140.5	152.5	179.8	207.9	169.7	168.8	161.6	177.7
Cullin-5 OS=Homo sapiens OX=9606 GN=CUL5 PE=1 SV=4	CUL5	53.9	52.4	56	60.5	63.6	69.4	50.9	61.9	60	67.8
Protein CutA OS=Homo sapiens OX=9606 GN=CUTA PE=1 SV=1	CUTA	86.8	94.5	46.4	67	63.3	70.2	45.8	55.6	58.2	61.4
Spliceosome-associated protein CWC15 homolog OS=Homo sapiens OX=9606 GN=CWC15 PE=1 SV=2	CWC15	1206.5	1119.3	966.8	1031.2	1030.4	1200.7	920.4	978	992.5	1018.5
CWF19-like protein 1 OS=Homo sapiens OX=9606 GN=CWF19L1 PE=1 SV=2	CWF19L1	83.3	73.1	71.9	85.5	82.1	111.3	79.5	77	79.5	81.9
Cytochrome b5 OS=Homo sapiens OX=9606 GN=CYB5A PE=1 SV=2	CYB5A	218.1	175.5	203.7	212.4	201.5	271.7	198.2	192.2	223.2	164.9
NADH-cytochrome b5 reductase 3 OS=Homo sapiens OX=9606 GN=CYB5R3 PE=1 SV=3	CYB5R3	707.5	545.5	752.2	888.8	878.8	1213.6	579	873.1	852	720.2
Cytochrome c1, heme protein, mitochondrial OS=Homo sapiens OX=9606 GN=CYC1 PE=1 SV=3	CYC1	245.8	175.7	248.3	320.2	326.9	401.3	171.9	328.9	304.2	283.3
Cytochrome c (Fragment) OS=Homo sapiens OX=9606 GN=CYCS PE=1 SV=1	CYCS	9298.2	9112.2	7187.5	7129.4	7639.5	10003.3	7043.6	7001.6	6913.6	7271.3
CYFIP-related Rac1 interactor B OS=Homo sapiens OX=9606 GN=CYRIB PE=1 SV=1	CYRIB	831.2	653.9	650	727.4	791.2	964.1	658.3	702.4	705.5	645.9
Aspartate--tRNA ligase, cytoplasmic OS=Homo sapiens OX=9606 GN=DARS1 PE=1 SV=2	DARS1	2984	2645.5	2297.9	2722.3	2787.1	3447.2	2593	2588.9	2715.1	2585.3
Aspartate--tRNA ligase, mitochondrial OS=Homo sapiens OX=9606 GN=DARS2 PE=1 SV=1	DARS2	470	416.4	382.2	478.2	461.1	573.9	421.6	462.3	458.6	438
DAZ-associated protein 1 OS=Homo sapiens OX=9606 GN=DAZAP1 PE=1 SV=1	DAZAP1	546.8	484.1	386.7	429.3	426.9	520.8	394.5	408.4	417.9	353.5
Acyl-CoA-binding protein OS=Homo sapiens OX=9606 GN=DBI PE=1 SV=1	DBI	1745.9	1507.4	1435.2	1413.7	1508.3	1858.5	1366.6	1427.4	1321.7	1365.7
Drebrin OS=Homo sapiens OX=9606 GN=DBN1 PE=1 SV=4	DBN1	4511.2	4207	3635	3748.6	3702.8	4715.2	3561.9	3638.4	3453.8	3546.2
Drebrin-like protein OS=Homo sapiens OX=9606 GN=DBNL PE=1 SV=1	DBNL	188.1	185.5	168	183.7	164.9	202.6	135.6	159.2	151.2	132.2
DDB1- and CUL4-associated factor 16 OS=Homo sapiens OX=9606 GN=DCAF16 PE=1 SV=1	DCAF16	49.5	38.6	33.7	42.9	41.9	53.9	41	36.5	42.2	43.1
mRNA-decapping enzyme 1A OS=Homo sapiens OX=9606 GN=DCP1A PE=1 SV=3	DCP1A	57.7	61.6	50	63.5	66.5	60.4	54.2	55.4	63.2	55.2
m7GpppX diphosphatase OS=Homo sapiens OX=9606 GN=DCPS PE=1 SV=2	DCPS	378.3	326.1	273.8	379.7	401.5	429.1	314.8	375.2	345.4	353.1
Dynactin subunit 1 OS=Homo sapiens OX=9606 GN=DCTN1 PE=1 SV=3	DCTN1	739.4	629.5	520.4	597.5	637.7	818.1	573.8	581.5	555.4	558.3
Dynactin subunit 2 OS=Homo sapiens OX=9606 GN=DCTN2 PE=1 SV=4	DCTN2	2825.9	2573.1	2120.6	2263.1	2335.1	3018.3	2226.8	2188.3	2179.6	2109.4
Dynactin subunit 3 OS=Homo sapiens OX=9606 GN=DCTN3 PE=1 SV=1	DCTN3	536.1	473.4	422.5	438.4	463.2	625.9	437.9	445.9	421.2	447.9
dCTP pyrophosphatase 1 OS=Homo sapiens OX=9606 GN=DCTPP1 PE=1 SV=1	DCTPP1	2293.4	2073.3	1497	2020.7	1926.6	2404.8	1632.3	1882.4	1576.9	1508.7
L-xylulose reductase OS=Homo sapiens OX=9606 GN=DCXR PE=1 SV=2	DCXR	513.2	451.9	382.5	450.1	496.4	582.2	413.4	487.2	469.1	435.5
N(G),N(G)-dimethylarginine dimethylaminohydrolase 1 OS=Homo sapiens OX=9606 GN=DDAH1 PE=1 SV=3	DDAH1	66.6	61.8	51.7	65.8	51.6	74.2	52.8	53.9	48.5	45.7
DNA damage-binding protein 1 OS=Homo sapiens OX=9606 GN=DDB1 PE=1 SV=1	DDB1	12555.2	11213.4	9329.6	10346.6	11257.4	14215.1	10422.6	10538.2	10615.2	10066
Protein DDI1 homolog 2 OS=Homo sapiens OX=9606 GN=DDI2 PE=1 SV=1	DDI2	126.2	111	101	130.6	115.4	130.7	98.5	114	118.8	97.4
Dolichyl-diphosphooligosaccharide--protein glycosyltransferase 48 kDa subunit OS=Homo sapiens OX=9606 GN=DDOST PE=1 SV=4	DDOST	178.4	123.4	208.6	228.2	219.3	320.7	153.9	233.1	241.9	222.8
D-dopachrome decarboxylase OS=Homo sapiens OX=9606 GN=DDT PE=1 SV=3	DDT	95.4	97.9	48.4	71	70.5	80.8	56.6	64.7	56.1	52.1
ATP-dependent RNA helicase DDX1 OS=Homo sapiens OX=9606 GN=DDX1 PE=1 SV=2	DDX1	4115.4	3292.6	3284.3	4132	4307.2	5063.9	3798.4	4123.6	4116.4	3944.9
Probable ATP-dependent RNA helicase DDX17 OS=Homo sapiens OX=9606 GN=DDX17 PE=1 SV=2	DDX17	7974.9	6890.8	5921.4	7331.5	7644.1	9119.9	6876.8	7037.6	7241.7	6720.4
ATP-dependent RNA helicase DDX18 OS=Homo sapiens OX=9606 GN=DDX18 PE=1 SV=2	DDX18	2230.8	1591.7	1820.8	2214.5	2271.5	2919.4	2037.1	2201.8	1991.5	2151.3
ATP-dependent RNA helicase DDX19A OS=Homo sapiens OX=9606 GN=DDX19A PE=1 SV=1	DDX19A	1155.9	1033.8	864.1	991.7	1004.3	1223.6	963.7	936.4	988.5	988.9
Nucleolar RNA helicase 2 OS=Homo sapiens OX=9606 GN=DDX21 PE=1 SV=5	DDX21	11407.6	9422.2	9018.7	11079.9	11683.2	14215.4	10076.2	11223.4	10412.3	11730.3
Probable ATP-dependent RNA helicase DDX23 OS=Homo sapiens OX=9606 GN=DDX23 PE=1 SV=3	DDX23	158.9	110.7	125.1	181.2	174.8	200.3	140.6	175.2	172.5	190.5
Probable ATP-dependent RNA helicase DDX27 OS=Homo sapiens OX=9606 GN=DDX27 PE=1 SV=2	DDX27	62.3	41	54.6	58.3	57.1	69.8	43.8	51.6	54.6	43.9
ATP-dependent RNA helicase DDX39A OS=Homo sapiens OX=9606 GN=DDX39A PE=1 SV=2	DDX39A	3149.7	2656.4	2344.3	2688.6	2810.3	3789	2515.6	2632	2646.9	2577.2
Spliceosome RNA helicase DDX39B OS=Homo sapiens OX=9606 GN=DDX39B PE=1 SV=1	DDX39B	5351.6	4504.3	4264.9	5355.5	5422.2	6605.4	4570.8	5181.8	4972.6	5012.8
ATP-dependent RNA helicase DDX3X OS=Homo sapiens OX=9606 GN=DDX3X PE=1 SV=3	DDX3X	10310.4	8253.8	8182.6	10221.4	10528.5	12537	9271.3	10014.9	10010.6	9677.5
ATP-dependent RNA helicase DDX42 OS=Homo sapiens OX=9606 GN=DDX42 PE=1 SV=1	DDX42	151.6	122.6	128.3	165.2	151	188.3	137.9	165.4	160	153.6
RNA helicase OS=Homo sapiens OX=9606 GN=DDX46 PE=1 SV=1	DDX46	2334.6	1973.4	1871.4	2196.2	2301	2707.8	2205.9	2222.2	2255.7	2270.1
Probable ATP-dependent RNA helicase DDX47 OS=Homo sapiens OX=9606 GN=DDX47 PE=1 SV=1	DDX47	133.1	109.8	108.4	133	129.6	171.9	129.7	138.8	143.3	160.4
DEAD box protein 5 OS=Homo sapiens OX=9606 GN=DDX5 PE=1 SV=1	DDX5	11777.7	9432.7	9305.2	11243.4	11717.7	13988.8	10419.2	11160.9	10878.4	10233.2
Probable ATP-dependent RNA helicase DDX52 (Fragment) OS=Homo sapiens OX=9606 GN=DDX52 PE=1 SV=1	DDX52	39.8	30.4	29	38.4	40.5	55.7	36.8	43	32.5	45.9
Probable ATP-dependent RNA helicase DDX6 OS=Homo sapiens OX=9606 GN=DDX6 PE=1 SV=2	DDX6	1146.8	989.7	839.9	983.6	1102.1	1323.4	975	1052.1	998.7	1051.6
DEK oncogene (DNA binding), isoform CRA_b OS=Homo sapiens OX=9606 GN=DEK PE=1 SV=2	DEK	594.7	461	547.4	589	614.1	779.7	504.6	626.2	627	597
Density-regulated protein OS=Homo sapiens OX=9606 GN=DENR PE=1 SV=2	DENR	540.2	454.3	439.7	395.1	480.1	523.8	456.1	446.4	439	495.1
DNA fragmentation factor subunit alpha OS=Homo sapiens OX=9606 GN=DFFA PE=1 SV=1	DFFA	546.4	472.4	450.1	495.6	443	536.7	387.4	454.2	457	421.5
Dihydrofolate reductase OS=Homo sapiens OX=9606 GN=DHFR PE=1 SV=2	DHFR	1858.5	1541.1	1325.7	1505	1548.8	1946.5	1469.7	1497.9	1441.4	1312.9
Pre-mRNA-splicing factor ATP-dependent RNA helicase DHX15 OS=Homo sapiens OX=9606 GN=DHX15 PE=1 SV=2	DHX15	4134.5	3165.6	3106.3	3955.5	3948.7	4964.1	3454.5	3763.9	3599.4	3608.6
Pre-mRNA-splicing factor ATP-dependent RNA helicase DHX16 (Fragment) OS=Homo sapiens OX=9606 GN=DHX16 PE=1 SV=1	DHX16	87.4	82.1	78.3	101.6	100.7	113.6	84.1	98.1	84.3	87.1
RNA helicase OS=Homo sapiens OX=9606 GN=DHX30 PE=1 SV=1	DHX30	215.4	159.5	172.1	191.5	207.5	268.8	183.5	202.5	219.3	203
RNA helicase (Fragment) OS=Homo sapiens OX=9606 GN=DHX36 PE=1 SV=1	DHX36	23.5	21.5	15	14.2	16.3	24	13.3	15.5	18.3	14.4
ATP-dependent RNA helicase A OS=Homo sapiens OX=9606 GN=DHX9 PE=1 SV=4	DHX9	18778.8	15421.4	15410.8	18649.2	18741.3	23508.7	17250	17991.9	18093.8	17832.3
Diablo homolog, mitochondrial OS=Homo sapiens OX=9606 GN=DIABLO PE=1 SV=1	DIABLO	343.6	349	236.4	271.2	289.9	382.8	259.5	280	260.7	284.6
Protein diaphanous homolog 1 OS=Homo sapiens OX=9606 GN=DIAPH1 PE=1 SV=2	DIAPH1	1086.2	893.6	823.8	934.3	1002.8	1203.4	920.6	935.9	959.2	929.2
Exosome complex exonuclease RRP44 OS=Homo sapiens OX=9606 GN=DIS3 PE=1 SV=2	DIS3	594.6	470.4	469.9	561.6	579.3	702.7	522.4	525.5	533.1	551.5
H/ACA ribonucleoprotein complex subunit DKC1 OS=Homo sapiens OX=9606 GN=DKC1 PE=1 SV=3	DKC1	25.6	11.9	15.3	23.3	25	24.4	16.7	16.9	16.7	20.2
Dihydrolipoyllysine-residue acetyltransferase component of pyruvate dehydrogenase complex, mitochondrial OS=Homo sapiens OX=9606 GN=DLAT PE=1 SV=3	DLAT	3689.9	3284.7	2832.9	3062.2	3279.4	4253.8	2976	3121.2	3103.2	2983.3
Dihydrolipoyl dehydrogenase, mitochondrial OS=Homo sapiens OX=9606 GN=DLD PE=1 SV=2	DLD	2640.1	2461.3	2114.9	2371.6	2380.5	2986.4	2239.9	2346.7	2218.7	2186.2
Dihydrolipoyllysine-residue succinyltransferase component of 2-oxoglutarate dehydrogenase complex, mitochondrial OS=Homo sapiens OX=9606 GN=DLST PE=1 SV=4	DLST	899.9	782	704.2	783.7	842.9	983.2	738.9	830.3	762.9	800.2
Dynein assembly factor 5, axonemal OS=Homo sapiens OX=9606 GN=DNAAF5 PE=1 SV=4	DNAAF5	131.6	108.9	102	134.8	127.5	144.3	119	123.6	128.2	107.4
DnaJ homolog subfamily A member 1 OS=Homo sapiens OX=9606 GN=DNAJA1 PE=1 SV=2	DNAJA1	5162.4	4169	4046.3	4656.7	4936.6	6129.6	4663.8	4857.5	4622.7	4643.8
DnaJ homolog subfamily A member 2 OS=Homo sapiens OX=9606 GN=DNAJA2 PE=1 SV=1	DNAJA2	1803.7	1459.7	1350.6	1816.5	1884	2213.7	1484	1826	1490.7	1503.7
DnaJ homolog subfamily A member 3, mitochondrial OS=Homo sapiens OX=9606 GN=DNAJA3 PE=1 SV=2	DNAJA3	100.6	90.7	88.1	114.9	120.8	149.3	92.8	118.4	92.4	93.7
DnaJ homolog subfamily B member 1 OS=Homo sapiens OX=9606 GN=DNAJB1 PE=1 SV=4	DNAJB1	1423.4	1228	997.4	1160.2	1201	1462.5	1112	1164.8	1108.5	1093.2
DnaJ homolog subfamily B member 11 OS=Homo sapiens OX=9606 GN=DNAJB11 PE=1 SV=1	DNAJB11	193.6	177.7	140.2	175.8	163.6	240.8	172.5	168.8	128.9	144.8
DnaJ homolog subfamily C member 2 OS=Homo sapiens OX=9606 GN=DNAJC2 PE=1 SV=4	DNAJC2	48	40.6	39.1	56.7	59.7	60.1	45.9	45.1	48.7	39.9
DnaJ homolog subfamily C member 5 OS=Homo sapiens OX=9606 GN=DNAJC5 PE=1 SV=1	DNAJC5	133.2	100.7	97.4	107	120.2	167	95.1	112.7	93.3	91
DnaJ homolog subfamily C member 7 OS=Homo sapiens OX=9606 GN=DNAJC7 PE=1 SV=2	DNAJC7	2194.5	1836.8	1742.9	2177.9	2259	2611.1	1928.3	2249.6	2152.3	2090.9
DnaJ homolog subfamily C member 8 OS=Homo sapiens OX=9606 GN=DNAJC8 PE=1 SV=2	DNAJC8	2498.8	2211.1	1999.8	2152.9	2317.4	2664.9	2024.2	2189.1	2105	2234.7
DnaJ homolog subfamily C member 9 OS=Homo sapiens OX=9606 GN=DNAJC9 PE=1 SV=1	DNAJC9	311.3	240.5	345.5	342.3	267.9	510.1	288.1	423.5	323.9	246.7
Dynamin-1-like protein OS=Homo sapiens OX=9606 GN=DNM1L PE=1 SV=2	DNM1L	756.6	694.4	592.3	693.1	739.7	921.9	663.2	732.1	668.7	675.1
Dynamin-2 OS=Homo sapiens OX=9606 GN=DNM2 PE=1 SV=2	DNM2	1178.6	997.1	892.5	1078.3	1127.9	1396.3	952.4	1082.2	926.2	970.7
2'-deoxynucleoside 5'-phosphate N-hydrolase 1 OS=Homo sapiens OX=9606 GN=DNPH1 PE=1 SV=1	DNPH1	758.2	691.1	495.8	594.8	631.5	717.1	554.2	582.8	591.2	525.4
Deoxynucleotidyltransferase terminal-interacting protein 2 OS=Homo sapiens OX=9606 GN=DNTTIP2 PE=1 SV=1	DNTTIP2	63	54.1	54.8	66.6	77	79	47.2	72.3	69.8	63.3
Dipeptidyl peptidase 3 OS=Homo sapiens OX=9606 GN=DPP3 PE=1 SV=1	DPP3	487.7	399	367.4	413.4	432.7	538.1	395.8	398.7	405.7	369.9
Dihydropyrimidinase-related protein 2 OS=Homo sapiens OX=9606 GN=DPYSL2 PE=1 SV=1	DPYSL2	1537.3	1308.9	1148.4	1248.7	1285.9	1675.3	1263.4	1214.1	1189.8	1171.8
Dihydropyrimidinase-related protein 3 (Fragment) OS=Homo sapiens OX=9606 GN=DPYSL3 PE=1 SV=1	DPYSL3	73.2	65.3	51.2	64.1	67	83.8	60.4	62.4	71.3	57.9
Dihydropyrimidinase-related protein 5 OS=Homo sapiens OX=9606 GN=DPYSL5 PE=1 SV=1	DPYSL5	559.9	468.1	421.7	402.9	460.3	622.9	460.9	409.8	403.9	375.9
Protein Dr1 OS=Homo sapiens OX=9606 GN=DR1 PE=1 SV=1	DR1	57.9	47.8	38.3	36.7	41.6	50.1	36.4	42.2	40.6	40.6
Dr1-associated corepressor (Fragment) OS=Homo sapiens OX=9606 GN=DRAP1 PE=1 SV=8	DRAP1	13.7	13.7	13.4	15.2	15.4	17.9	13.4	12.9	14.7	10.8
Developmentally-regulated GTP-binding protein 1 OS=Homo sapiens OX=9606 GN=DRG1 PE=1 SV=1	DRG1	1412.4	1081.2	1091.7	1276.1	1344.2	1746.9	1218.6	1321.3	1275.5	1315.9
Developmentally-regulated GTP-binding protein 2 OS=Homo sapiens OX=9606 GN=DRG2 PE=1 SV=1	DRG2	344.5	278.1	261.4	273.6	301.7	374.1	286.3	280.7	290.5	277.2
Desmoglein-2 OS=Homo sapiens OX=9606 GN=DSG2 PE=1 SV=2	DSG2	708.1	612	546.2	588.2	623.2	865.4	536.4	594.6	567.8	534
Desmoplakin OS=Homo sapiens OX=9606 GN=DSP PE=1 SV=3	DSP	90.6	83.9	47.1	61.2	74.2	85.4	57.8	73.2	59	63.6
Destrin OS=Homo sapiens OX=9606 GN=DSTN PE=1 SV=3	DSTN	1263.7	1141.2	980	932.3	1020.8	1313.8	1113	904.1	1234.8	1170.3
D-aminoacyl-tRNA deacylase 1 OS=Homo sapiens OX=9606 GN=DTD1 PE=1 SV=2	DTD1	9.3	10.4	10.8	10.2	8.4	11.7	8.6	12.1	10.2	9
Thymidylate kinase OS=Homo sapiens OX=9606 GN=DTYMK PE=1 SV=4	DTYMK	198.2	159.6	137.3	254.7	266.1	219.3	148.3	253.6	234.2	227.8
Dual specificity protein phosphatase 3 OS=Homo sapiens OX=9606 GN=DUSP3 PE=1 SV=1	DUSP3	345.6	288.4	231.1	244.9	282.7	343.7	259.8	248.5	260.5	241.1
Deoxyuridine 5'-triphosphate nucleotidohydrolase OS=Homo sapiens OX=9606 GN=DUT PE=1 SV=1	DUT	264.9	279	189.4	237.9	189.4	236.1	182.8	210.6	202.5	166.3
Cytoplasmic dynein 1 heavy chain 1 OS=Homo sapiens OX=9606 GN=DYNC1H1 PE=1 SV=5	DYNC1H1	8851.2	7405.3	6994.9	8464.5	8969.7	10772.1	7773.6	8593.7	8301.3	8025.5
Cytoplasmic dynein 1 intermediate chain 2 OS=Homo sapiens OX=9606 GN=DYNC1I2 PE=1 SV=3	DYNC1I2	933.9	814.8	689.1	836.2	886.6	1051.2	757.5	844.5	756.3	742.1
Cytoplasmic dynein 1 light intermediate chain 1 OS=Homo sapiens OX=9606 GN=DYNC1LI1 PE=1 SV=3	DYNC1LI1	1811	1578.1	1324.2	1506.7	1531.2	1931.1	1436.7	1407.2	1426	1405.3
Dynein light chain 1, cytoplasmic OS=Homo sapiens OX=9606 GN=DYNLL1 PE=1 SV=1	DYNLL1	1205.6	1039.8	947	1064.4	1110.6	1368.7	1039	1067	1032.3	1075.3
Dynein light chain 2, cytoplasmic OS=Homo sapiens OX=9606 GN=DYNLL2 PE=1 SV=1	DYNLL2	609.1	535.8	459.1	480.9	517	683.3	475.2	476.4	491.1	472.1
Dynein light chain roadblock-type 2 OS=Homo sapiens OX=9606 GN=DYNLRB2 PE=1 SV=1	DYNLRB2	66.2	63.7	59.6	57	59	77.9	59.2	60.4	57.2	53.5
Probable rRNA-processing protein EBP2 OS=Homo sapiens OX=9606 GN=EBNA1BP2 PE=1 SV=2	EBNA1BP2	63.7	48.5	61	71.9	66.8	87.7	58.4	67.4	73.4	71.5
Protein ecdysoneless homolog OS=Homo sapiens OX=9606 GN=ECD PE=1 SV=1	ECD	135.8	114.2	117.3	146.2	154.9	164.9	120.1	140.4	148.4	137.3
Delta(3,5)-Delta(2,4)-dienoyl-CoA isomerase, mitochondrial OS=Homo sapiens OX=9606 GN=ECH1 PE=1 SV=2	ECH1	307.2	278	250.1	297.7	292.3	370.6	262.4	288.3	291.2	277.6
Ethylmalonyl-CoA decarboxylase OS=Homo sapiens OX=9606 GN=ECHDC1 PE=1 SV=2	ECHDC1	71.5	61.4	62.2	61.8	74.8	76.4	63.9	65.2	65.8	63.4
Enoyl-CoA hydratase, mitochondrial OS=Homo sapiens OX=9606 GN=ECHS1 PE=1 SV=4	ECHS1	5701.3	5182.3	4523.3	4927.8	5029.2	6505.9	4666.8	5055.6	4830.6	4699.1
Enoyl-CoA delta isomerase 1, mitochondrial OS=Homo sapiens OX=9606 GN=ECI1 PE=1 SV=1	ECI1	633.3	580.5	521.3	742.1	739.4	765.7	577.8	723.8	747.1	675.5
Proteasome adapter and scaffold protein ECM29 OS=Homo sapiens OX=9606 GN=ECPAS PE=1 SV=1	ECPAS	24.7	18.9	20.6	20.4	24.2	23	19.2	17.2	21	18.4
Enhancer of mRNA-decapping protein 3 OS=Homo sapiens OX=9606 GN=EDC3 PE=1 SV=1	EDC3	384.7	301.7	282.9	336.5	350.1	418.6	302.6	341.7	315.7	335.5
Enhancer of mRNA-decapping protein 4 OS=Homo sapiens OX=9606 GN=EDC4 PE=1 SV=1	EDC4	260.4	221.5	214.1	231.8	234	279.1	212.6	229.2	210.7	198.8
Endothelial differentiation-related factor 1 OS=Homo sapiens OX=9606 GN=EDF1 PE=1 SV=1	EDF1	4935.1	4331.3	4000.5	4449.5	4630.2	5144.3	3994.9	4350.3	4246.2	4285.2
Early endosome antigen 1 OS=Homo sapiens OX=9606 GN=EEA1 PE=1 SV=2	EEA1	34	30.3	26.7	31	29.9	36.5	29	30	27.2	33.7
Elongation factor 1-alpha 1 OS=Homo sapiens OX=9606 GN=EEF1A1 PE=1 SV=1	EEF1A1	67160.8	55781	54986.8	67413	69892.2	79884.1	60916.7	67081.3	65689.6	67213.8
Elongation factor 1-alpha 2 OS=Homo sapiens OX=9606 GN=EEF1A2 PE=1 SV=1	EEF1A2	114.4	104.4	90.8	145.2	142.1	143.3	117.1	128.8	132.9	137.6
Elongation factor 1-beta OS=Homo sapiens OX=9606 GN=EEF1B2 PE=1 SV=3	EEF1B2	9788.6	9489	8095.5	9321.8	7923.2	9933.8	7437.9	8838.5	7918.5	7340.6
Elongation factor 1-delta OS=Homo sapiens OX=9606 GN=EEF1D PE=1 SV=5	EEF1D	9981.4	9567.2	7318.5	8067.4	7516.4	9733.6	7288.3	7520.3	7524.5	6600.2
EEF1E1-BLOC1S5 readthrough (NMD candidate) OS=Homo sapiens OX=9606 GN=EEF1E1-BLOC1S5 PE=4 SV=2	EEF1E1-BLOC1S5	725.2	558.2	564.3	700.4	740.3	817.4	583.6	706.5	637.1	649.7
Elongation factor 1-gamma OS=Homo sapiens OX=9606 GN=EEF1G PE=1 SV=3	EEF1G	52635.7	45570.4	39314.1	48458.3	51767.4	57874.4	44567.4	49177.1	49522.3	50539.3
Elongation factor 2 OS=Homo sapiens OX=9606 GN=EEF2 PE=1 SV=4	EEF2	88920.1	74660.4	68062.6	81681.9	88166.7	103865	75267.2	82422.8	79816.5	81099.4
EF-hand domain-containing protein D2 OS=Homo sapiens OX=9606 GN=EFHD2 PE=1 SV=1	EFHD2	79.4	76.4	53.4	54.6	54.7	85.6	59.6	48.6	56.5	55.1
116 kDa U5 small nuclear ribonucleoprotein component OS=Homo sapiens OX=9606 GN=EFTUD2 PE=1 SV=1	EFTUD2	8974.3	7996	6914.3	7772.6	8344.6	10132.4	7696	7786	7826.2	7756.7
EH domain-containing protein 1 OS=Homo sapiens OX=9606 GN=EHD1 PE=1 SV=1	EHD1	176	143.4	110.8	135.5	132.3	210	150.5	133.8	133.5	130
Histone-lysine N-methyltransferase EHMT2 OS=Homo sapiens OX=9606 GN=EHMT2 PE=1 SV=1	EHMT2	22.6	19.4	18.8	19.2	21.4	24.5	17.7	21.6	21.9	17.3
Eukaryotic translation initiation factor 1 OS=Homo sapiens OX=9606 GN=EIF1 PE=1 SV=1	EIF1	3028.3	2753.3	2070.5	2567.7	2427.2	3213.5	1934	2601.1	1728.8	1888.5
Eukaryotic translation initiation factor 1A, X-chromosomal OS=Homo sapiens OX=9606 GN=EIF1AX PE=1 SV=2	EIF1AX	3006.7	2495.6	2338.8	2843.3	2888.1	3473.6	2506.3	2809.8	2542.2	2562.3
Eukaryotic translation initiation factor 2A OS=Homo sapiens OX=9606 GN=EIF2A PE=1 SV=3	EIF2A	1122.1	864.3	868.5	985.1	1053.2	1288.5	948.8	1008.7	1004.8	1003
Translation initiation factor eIF-2B subunit alpha (Fragment) OS=Homo sapiens OX=9606 GN=EIF2B1 PE=1 SV=1	EIF2B1	530.9	445.3	406	446.1	516.4	598.8	438.9	472.8	476.8	431.8
Translation initiation factor eIF-2B subunit beta OS=Homo sapiens OX=9606 GN=EIF2B2 PE=1 SV=3	EIF2B2	620.2	535.7	438.3	563	572.2	722.5	496.2	566.1	545.1	542
Translation initiation factor eIF-2B subunit gamma OS=Homo sapiens OX=9606 GN=EIF2B3 PE=1 SV=1	EIF2B3	134.3	105.6	94.9	129.5	137	159.8	110.7	143.7	119.2	115.8
Eukaryotic translation initiation factor 2D OS=Homo sapiens OX=9606 GN=EIF2D PE=1 SV=3	EIF2D	95.8	74.2	73.7	74.2	80.9	114.6	78.3	90.8	85	87.3
Eukaryotic translation initiation factor 2 subunit 1 OS=Homo sapiens OX=9606 GN=EIF2S1 PE=1 SV=3	EIF2S1	4394	3854.9	3355.5	3927.5	4113.9	4907.3	3693	3851.9	4201.2	3913.2
Eukaryotic translation initiation factor 2 subunit 2 OS=Homo sapiens OX=9606 GN=EIF2S2 PE=1 SV=2	EIF2S2	2193	1804	1661.4	2104.6	2292.4	2676.4	1804.6	2152.1	1892.5	1889.6
Eukaryotic translation initiation factor 2 subunit 3 OS=Homo sapiens OX=9606 GN=EIF2S3 PE=1 SV=3	EIF2S3	4621.2	3708.3	3456.9	4227.2	4445.3	5599.4	3890.4	4368.7	4099.2	3876.4
Eukaryotic translation initiation factor 3 subunit A OS=Homo sapiens OX=9606 GN=EIF3A PE=1 SV=1	EIF3A	11884.5	9776.1	9297.8	11329.8	11767.2	14464.1	10282.4	11170.8	10559.8	10531.9
Eukaryotic translation initiation factor 3 subunit B OS=Homo sapiens OX=9606 GN=EIF3B PE=1 SV=3	EIF3B	4697.5	3913.9	3641.9	4302.6	4533.6	5613.1	4021.2	4207.4	4185.5	4093.9
Eukaryotic translation initiation factor 3 subunit C OS=Homo sapiens OX=9606 GN=EIF3C PE=1 SV=1	EIF3C	8398.8	6941.9	6516.8	8077.1	8421.9	10293.4	7275.1	7981.4	7556.7	7372.8
Eukaryotic translation initiation factor 3 subunit D OS=Homo sapiens OX=9606 GN=EIF3D PE=1 SV=1	EIF3D	1905	1458	1527.9	1974.8	2062.3	2410.6	1652.1	1867	1896.2	1883.1
Eukaryotic translation initiation factor 3 subunit E OS=Homo sapiens OX=9606 GN=EIF3E PE=1 SV=1	EIF3E	2566	2247.6	2118.9	2584	2674.5	3210	2301.5	2523.3	2533.6	2430.4
Eukaryotic translation initiation factor 3 subunit F OS=Homo sapiens OX=9606 GN=EIF3F PE=1 SV=1	EIF3F	1052	951.5	775.3	958.2	1030	1180.1	839.8	931.1	915.7	908.2
Eukaryotic translation initiation factor 3 subunit G (Fragment) OS=Homo sapiens OX=9606 GN=EIF3G PE=1 SV=8	EIF3G	389	341.8	298.3	320.3	327.7	431.6	289.6	314.8	296	277
Eukaryotic translation initiation factor 3 subunit H OS=Homo sapiens OX=9606 GN=EIF3H PE=1 SV=1	EIF3H	4112	3615.5	2996.3	3595.3	3810.1	4520.4	3420.7	3651.2	3451.7	3413.5
Eukaryotic translation initiation factor 3 subunit I OS=Homo sapiens OX=9606 GN=EIF3I PE=1 SV=1	EIF3I	5403.4	4842.7	3914.2	4972.5	4916	5948	4299.6	4713.8	4233.2	4239.9
Eukaryotic translation initiation factor 3 subunit J OS=Homo sapiens OX=9606 GN=EIF3J PE=1 SV=2	EIF3J	453	394.5	370.2	405.3	427.6	505.8	358.7	405.8	398.6	382.2
Eukaryotic translation initiation factor 3 subunit K OS=Homo sapiens OX=9606 GN=EIF3K PE=1 SV=1	EIF3K	2636.7	2325.8	1913.5	2180.5	2388.7	2945.9	2130.6	2218.3	2201	2244.8
Eukaryotic translation initiation factor 3 subunit L OS=Homo sapiens OX=9606 GN=EIF3L PE=1 SV=1	EIF3L	5324	4469.6	3998.5	4873.3	5142.3	6387.4	4622.8	4963.9	4840	4837.8
Eukaryotic translation initiation factor 3 subunit M OS=Homo sapiens OX=9606 GN=EIF3M PE=1 SV=1	EIF3M	1465.7	1320.1	1118	1375.3	1531.8	1727.5	1235.7	1335.4	1375.4	1382.5
Eukaryotic initiation factor 4A-I OS=Homo sapiens OX=9606 GN=EIF4A1 PE=1 SV=1	EIF4A1	17396	14567.2	13663.4	16195	17008.8	20878.3	14935.6	15869.7	15476.5	15133.1
Eukaryotic initiation factor 4A-II OS=Homo sapiens OX=9606 GN=EIF4A2 PE=1 SV=2	EIF4A2	74.8	68.8	62.8	61.1	70.1	93.6	69.3	55.9	69.3	65.7
Eukaryotic initiation factor 4A-III OS=Homo sapiens OX=9606 GN=EIF4A3 PE=1 SV=4	EIF4A3	7424.4	6413.4	5847	6776.9	7085.8	9107.6	6352.4	6593.1	6546.2	6449.5
Eukaryotic translation initiation factor 4B OS=Homo sapiens OX=9606 GN=EIF4B PE=1 SV=1	EIF4B	4605.8	4332.8	3751.8	4283.4	4183.6	4748.1	3776.8	4114.7	3838.4	3977.1
Eukaryotic translation initiation factor 4E OS=Homo sapiens OX=9606 GN=EIF4E PE=1 SV=1	EIF4E	944.7	810.9	681	874.5	923	1029.9	791.9	836.1	918.9	811
Eukaryotic translation initiation factor 4 gamma 1 OS=Homo sapiens OX=9606 GN=EIF4G1 PE=1 SV=1	EIF4G1	11101.1	9574.7	8097.8	9631.7	10018.4	12151.1	8955.5	9466.4	9138.3	9001.4
Eukaryotic translation initiation factor 4 gamma 2 OS=Homo sapiens OX=9606 GN=EIF4G2 PE=1 SV=1	EIF4G2	1176.9	979.4	872.4	1053.1	1168.6	1364	961.5	1082.3	1064.3	1092.5
Eukaryotic translation initiation factor 4H OS=Homo sapiens OX=9606 GN=EIF4H PE=1 SV=5	EIF4H	3622.3	3434	2586.6	2994.9	2707.7	3393.2	2788.6	2711.1	2915.2	2398
Eukaryotic translation initiation factor 5 OS=Homo sapiens OX=9606 GN=EIF5 PE=1 SV=2	EIF5	513.1	393.4	395.2	492	546.3	597.2	422.1	534.2	492.9	477.5
Eukaryotic translation initiation factor 5A-1 OS=Homo sapiens OX=9606 GN=EIF5A PE=1 SV=2	EIF5A	19079.4	17685.5	15907.3	17922.6	16489.5	20987.2	15307.8	16611.4	15755.4	14623.5
Eukaryotic translation initiation factor 5B OS=Homo sapiens OX=9606 GN=EIF5B PE=1 SV=4	EIF5B	4334.1	3048	3262.1	3947.3	4092.5	5306.9	3688.9	4042.1	3641.4	3780.9
Eukaryotic translation initiation factor 6 OS=Homo sapiens OX=9606 GN=EIF6 PE=1 SV=1	EIF6	1439.7	1316.3	1017.5	1221	1264	1493.3	1091	1170.7	1166.7	1108.3
ElaC homolog protein 2 OS=Homo sapiens OX=9606 GN=ELAC2 PE=1 SV=1	ELAC2	923.5	744.1	759.8	934.4	911.2	1105.1	798.8	890.5	853.8	801.3
ELAV-like protein 1 OS=Homo sapiens OX=9606 GN=ELAVL1 PE=1 SV=2	ELAVL1	4109.2	3598.6	3123	3683.3	3599.9	4731.2	3301.7	3339.7	3449.6	3269.6
Elongin-B OS=Homo sapiens OX=9606 GN=ELOB PE=1 SV=1	ELOB	1780.1	1620.1	1254.7	1421.8	1429.3	1887.7	1382.3	1390.2	1466	1300.8
Elongin-C OS=Homo sapiens OX=9606 GN=ELOC PE=1 SV=1	ELOC	1270.3	1087.6	978.7	1105.2	1124.4	1434.6	1048.3	1066.2	1090.7	1029.9
IkappaB kinase complex-associated protein OS=Homo sapiens OX=9606 GN=ELP1 PE=1 SV=1	ELP1	109.5	99.3	90.8	107.3	111.2	150.2	111	103.3	102.3	105.9
Elongator complex protein 2 OS=Homo sapiens OX=9606 GN=ELP2 PE=1 SV=2	ELP2	17.7	20	13.5	19.6	19.2	22.1	17	17.3	19.7	17.2
Elongator complex protein 3 OS=Homo sapiens OX=9606 GN=ELP3 PE=1 SV=1	ELP3	72.2	51.6	46.2	67.7	110.4	81.3	49.5	55.8	65.7	62.7
ER membrane protein complex subunit 2 (Fragment) OS=Homo sapiens OX=9606 GN=EMC2 PE=1 SV=1	EMC2	82	64.4	60.8	77.7	81.4	96.3	54.9	67.7	69.1	78.5
ER membrane protein complex subunit 8 (Fragment) OS=Homo sapiens OX=9606 GN=EMC8 PE=1 SV=1	EMC8	77.1	79.3	67.4	87.7	74.3	88.9	66.6	76.9	76	65.3
Emerin OS=Homo sapiens OX=9606 GN=EMD PE=1 SV=1	EMD	978	707.4	1101.5	1113.3	1197.1	1621.3	867.4	1117.3	1260.7	1095
Ribosomal RNA small subunit methyltransferase NEP1 OS=Homo sapiens OX=9606 GN=EMG1 PE=1 SV=4	EMG1	90	84.5	65.8	93.3	97.3	125.2	78.8	89.6	94.7	88.9
Echinoderm microtubule-associated protein-like 4 OS=Homo sapiens OX=9606 GN=EML4 PE=1 SV=3	EML4	487.5	366	375.3	443.9	433.3	508.1	421.6	423.9	424.9	420.3
Protein enabled homolog OS=Homo sapiens OX=9606 GN=ENAH PE=1 SV=1	ENAH	1301.6	1162.2	1010.9	1033.8	1107.2	1314.8	999.3	1021.8	1061.3	1070.3
Alpha-enolase OS=Homo sapiens OX=9606 GN=ENO1 PE=1 SV=2	ENO1	89015	77461	63737.6	77352.6	82914.3	95472.2	71102.2	77333.9	77141.8	73679.1
2-phospho-D-glycerate hydro-lyase OS=Homo sapiens OX=9606 GN=ENO2 PE=1 SV=1	ENO2	54.9	48.1	38.2	46.3	52.5	53.7	43.6	46.5	44.4	44.9
Enolase-phosphatase E1 OS=Homo sapiens OX=9606 GN=ENOPH1 PE=1 SV=1	ENOPH1	470.7	410	309.7	345.2	387.9	517.8	366.5	367.4	340.4	329.8
Alpha-endosulfine OS=Homo sapiens OX=9606 GN=ENSA PE=1 SV=2	ENSA	1449.8	1226.1	1132.4	1160.2	1291.7	1530.9	1069.2	1183.9	1072.2	1176.3
Transcription and mRNA export factor ENY2 OS=Homo sapiens OX=9606 GN=ENY2 PE=1 SV=1	ENY2	565.5	530.2	433.7	495.7	449.6	609.8	423.7	468.9	394.5	387.8
Band 4.1 OS=Homo sapiens OX=9606 GN=EPB41 PE=1 SV=1	EPB41	58.9	55.7	48.7	58.5	68.9	78.9	52.2	63.9	59.7	54.7
Band 4.1-like protein 2 OS=Homo sapiens OX=9606 GN=EPB41L2 PE=1 SV=1	EPB41L2	3931.9	3521	2891.6	3387.8	3467.7	4490.4	3123.9	3359.2	3074.8	3083.2
Band 4.1-like protein 3 OS=Homo sapiens OX=9606 GN=EPB41L3 PE=1 SV=1	EPB41L3	87.1	83	63	72.9	71.2	91	68.7	74.4	78.1	62
Epiplakin OS=Homo sapiens OX=9606 GN=EPPK1 PE=1 SV=3	EPPK1	534	458.6	400.2	443	480.3	582.9	441.5	438.8	429.6	428.8
Bifunctional glutamate/proline--tRNA ligase OS=Homo sapiens OX=9606 GN=EPRS1 PE=1 SV=5	EPRS1	6569	5241.6	5273.5	6197.5	6569.6	7944.4	5831.8	6247.1	5936.5	6056.1
Epidermal growth factor receptor substrate 15-like 1 OS=Homo sapiens OX=9606 GN=EPS15L1 PE=1 SV=1	EPS15L1	330.3	307.1	247.8	285.5	292.3	354	267.3	276	292.6	261.9
ELKS/Rab6-interacting/CAST family member 1 OS=Homo sapiens OX=9606 GN=ERC1 PE=1 SV=1	ERC1	16	14.7	12.4	16.2	13.2	15	10.8	16.3	11.6	10.2
Endoplasmic reticulum-Golgi intermediate compartment protein 3 OS=Homo sapiens OX=9606 GN=ERGIC3 PE=1 SV=1	ERGIC3	29.1	22.9	26.4	30.5	29.3	33.3	25.6	41.5	23.4	34.2
Enhancer of rudimentary homolog OS=Homo sapiens OX=9606 GN=ERH PE=1 SV=1	ERH	3691.9	3965.3	2760.2	3239.9	2594.9	3634.3	2668.7	2865.3	2722.2	2067.4
Erlin-2 OS=Homo sapiens OX=9606 GN=ERLIN2 PE=1 SV=1	ERLIN2	189.8	165	139.3	163.9	152.2	206.1	136.7	143.2	149.4	138
ERO1-like protein alpha OS=Homo sapiens OX=9606 GN=ERO1A PE=1 SV=2	ERO1A	92.3	102.4	64.4	81.6	79.6	112.4	78.5	77.3	77.5	73.6
Endoplasmic reticulum resident protein 29 OS=Homo sapiens OX=9606 GN=ERP29 PE=1 SV=4	ERP29	1152	1396.5	719.2	936.9	709.2	1013.8	719.2	767.1	709.7	587.5
Endoplasmic reticulum resident protein 44 OS=Homo sapiens OX=9606 GN=ERP44 PE=1 SV=1	ERP44	1434.8	1359.7	1072.9	1247.9	1199.2	1529.7	1185.5	1123.1	1218.4	1116.6
S-formylglutathione hydrolase OS=Homo sapiens OX=9606 GN=ESD PE=1 SV=2	ESD	141.4	122.6	117.5	168.6	173.9	162.4	131.1	152.3	156	139.2
Extended synaptotagmin-1 OS=Homo sapiens OX=9606 GN=ESYT1 PE=1 SV=1	ESYT1	336.9	256	366.2	397.4	388.8	540.6	290.9	386.2	422.6	348.6
Extended synaptotagmin-2 OS=Homo sapiens OX=9606 GN=ESYT2 PE=1 SV=1	ESYT2	71	63.1	56.2	69.6	73.9	70.7	65	61.6	60.8	58.3
Eukaryotic peptide chain release factor subunit 1 OS=Homo sapiens OX=9606 GN=ETF1 PE=1 SV=1	ETF1	3699.1	3134.1	2844.1	3513	3781.9	4550.7	3129.7	3576.6	3451.6	3300
Electron transfer flavoprotein subunit alpha, mitochondrial (Fragment) OS=Homo sapiens OX=9606 GN=ETFA PE=1 SV=8	ETFA	2084.6	1837.8	1581.9	1796.3	1928.4	2356.6	1666.7	1851.9	1842.3	1721
Electron transfer flavoprotein subunit beta OS=Homo sapiens OX=9606 GN=ETFB PE=1 SV=3	ETFB	665	615.9	503.1	575.6	638.5	722.4	515.9	578.5	595	551.8
RNA-binding protein EWS OS=Homo sapiens OX=9606 GN=EWSR1 PE=1 SV=1	EWSR1	3981.5	3403.6	3121.4	3431.5	3470.5	4096.6	3047.1	3402	3233.2	3501.8
Exosome complex component RRP40 OS=Homo sapiens OX=9606 GN=EXOSC3 PE=1 SV=3	EXOSC3	34.4	33.5	26.7	32.7	39.6	44	30.8	33	32.3	38.7
Exosome complex component RRP41 OS=Homo sapiens OX=9606 GN=EXOSC4 PE=1 SV=3	EXOSC4	350.9	418.5	272.2	305.1	339.5	397.6	296.4	312.6	309.7	336.5
Exosome complex component RRP42 OS=Homo sapiens OX=9606 GN=EXOSC7 PE=1 SV=3	EXOSC7	50.3	33.2	30.4	43.1	44.7	50.4	34.9	47.9	35.5	34
Eyes absent homolog OS=Homo sapiens OX=9606 GN=EYA3 PE=1 SV=1	EYA3	34	26.5	30	34.2	36.5	36.1	24	34.3	29	26.3
Ezrin OS=Homo sapiens OX=9606 GN=EZR PE=1 SV=4	EZR	7763.7	6482.4	6125.2	7035.5	7384	8976	6692.1	6943.9	7087.1	6898.4
Fatty acid-binding protein 5 OS=Homo sapiens OX=9606 GN=FABP5 PE=1 SV=3	FABP5	642.9	558.6	432.5	620.8	615.4	642.7	396.1	629.5	510.6	519.5
FAS-associated factor 1 OS=Homo sapiens OX=9606 GN=FAF1 PE=1 SV=2	FAF1	49.7	41.4	36	38.4	46.2	46.7	37.4	48	47.8	38.9
FAS-associated factor 2 OS=Homo sapiens OX=9606 GN=FAF2 PE=1 SV=2	FAF2	32.5	19.1	22.6	25.2	27.9	37.7	19	37.2	25.9	28
Fumarylacetoacetate hydrolase domain-containing protein 2A OS=Homo sapiens OX=9606 GN=FAHD2A PE=1 SV=1	FAHD2A	40.2	35	27.1	29.9	33	53.5	32.7	35.3	32.8	32.3
Protein FAM136A OS=Homo sapiens OX=9606 GN=FAM136A PE=1 SV=1	FAM136A	468.2	421.9	362.6	396.9	379.5	471.2	346.4	389.6	344	333
Protein FAM162A OS=Homo sapiens OX=9606 GN=FAM162A PE=1 SV=1	FAM162A	440.4	358.2	474.1	512.2	533.7	637.2	367.2	498.7	497.9	502.6
Protein FAM50A OS=Homo sapiens OX=9606 GN=FAM50A PE=1 SV=2	FAM50A	573	544.8	435.4	489.1	483.4	651.7	486.3	497.2	533.2	503.8
Protein FAM91A1 OS=Homo sapiens OX=9606 GN=FAM91A1 PE=1 SV=1	FAM91A1	30.5	22.6	21.5	26.7	24.7	32.9	25.9	24.2	29	26.5
Protein FAM98B OS=Homo sapiens OX=9606 GN=FAM98B PE=1 SV=2	FAM98B	206.1	165	163.1	188.9	213.2	251.4	184.1	199.4	187.3	195.1
Fanconi anemia group I protein OS=Homo sapiens OX=9606 GN=FANCI PE=1 SV=4	FANCI	331.4	298.3	255.7	294	314.6	381.2	277.9	299.8	280.1	296.7
Phenylalanine--tRNA ligase OS=Homo sapiens OX=9606 GN=FARSA PE=1 SV=1	FARSA	1072.6	902.4	862.4	1161.5	1201.5	1326	894.6	1075.9	1041.5	1026.2
Phenylalanine--tRNA ligase beta subunit OS=Homo sapiens OX=9606 GN=FARSB PE=1 SV=3	FARSB	2099.1	1751.1	1663	2074.2	2209.2	2471.8	1873.2	2066.7	2016.8	2062.5
Fatty acid synthase OS=Homo sapiens OX=9606 GN=FASN PE=1 SV=3	FASN	34807.1	29865.4	26670.1	30617.4	32679.3	40429.8	30297.4	30278.9	30783.4	29880.3
40S ribosomal protein S30 OS=Homo sapiens OX=9606 GN=FAU PE=1 SV=1	FAU	1602.3	1162.7	1485.5	1896.3	1767.3	1781.6	1549.6	1668.1	1767.4	1832.6
rRNA 2'-O-methyltransferase fibrillarin OS=Homo sapiens OX=9606 GN=FBL PE=1 SV=2	FBL	4433.6	3346.5	3639.9	4572.9	4558	5542.3	3914.5	4336.5	4316.6	4388.4
Squalene synthase OS=Homo sapiens OX=9606 GN=FDFT1 PE=1 SV=1	FDFT1	85.7	60	87	97.7	93.6	132.5	77.6	87.3	101.4	83.7
Farnesyl pyrophosphate synthase OS=Homo sapiens OX=9606 GN=FDPS PE=1 SV=4	FDPS	1080.7	955.3	848	971.7	1005.5	1218	919.5	912.6	962.3	944.9
Flap endonuclease 1 OS=Homo sapiens OX=9606 GN=FEN1 PE=1 SV=1	FEN1	2828.8	2099.3	2156.4	2592.5	2621.2	3471.6	2493.6	2663.5	2422.2	2538
Fermitin family homolog 2 (Fragment) OS=Homo sapiens OX=9606 GN=FERMT2 PE=1 SV=1	FERMT2	562.7	422.7	434.6	513.1	591	692.3	485.9	532.9	550.5	514.1
Fumarate hydratase, mitochondrial OS=Homo sapiens OX=9606 GN=FH PE=1 SV=3	FH	775.6	709.8	612.5	661.5	720.4	887.8	640	635.9	678.8	615.6
Four and a half LIM domains protein 1 (Fragment) OS=Homo sapiens OX=9606 GN=FHL1 PE=1 SV=1	FHL1	1747.9	1294.2	1420	1832.2	1909.8	2027.7	1549.5	1889.3	1738.4	1846.8
Pre-mRNA 3'-end-processing factor FIP1 OS=Homo sapiens OX=9606 GN=FIP1L1 PE=1 SV=1	FIP1L1	26.1	20.8	18.9	21.7	24.2	22.2	18.5	16.9	26.2	20.6
Mitochondrial fission 1 protein OS=Homo sapiens OX=9606 GN=FIS1 PE=1 SV=2	FIS1	62.1	61.5	48.9	53.3	58.4	89	52.5	53.8	54.7	48
Peptidylprolyl isomerase (Fragment) OS=Homo sapiens OX=9606 GN=FKBP10 PE=1 SV=1	FKBP10	545.4	493.4	475.7	529	576.2	674.8	447.5	527.3	507.4	493.2
Peptidyl-prolyl cis-trans isomerase FKBP1A OS=Homo sapiens OX=9606 GN=FKBP1A PE=1 SV=2	FKBP1A	170.3	177.9	122.2	152.8	125	151.3	118.7	120.7	124.9	104.3
Peptidyl-prolyl cis-trans isomerase FKBP2 OS=Homo sapiens OX=9606 GN=FKBP2 PE=1 SV=2	FKBP2	87.6	85.1	68.2	79.1	71.8	80.9	69.7	71.2	74.8	80.2
Peptidyl-prolyl cis-trans isomerase FKBP3 OS=Homo sapiens OX=9606 GN=FKBP3 PE=1 SV=1	FKBP3	1357	1258.1	1037	1265.6	1195.2	1386	1050.7	1176.6	1147.9	991.7
Peptidyl-prolyl cis-trans isomerase FKBP4 OS=Homo sapiens OX=9606 GN=FKBP4 PE=1 SV=3	FKBP4	14329.4	12375.6	10581	11372.3	12648.4	16013.9	11540.5	11624.9	11181.6	11407.4
Peptidyl-prolyl cis-trans isomerase FKBP5 OS=Homo sapiens OX=9606 GN=FKBP5 PE=1 SV=2	FKBP5	70.6	54.5	59.8	61	66.9	75.4	52.8	62.3	64.5	59.5
FAD synthase OS=Homo sapiens OX=9606 GN=FLAD1 PE=1 SV=1	FLAD1	19.1	17.6	12.9	15.8	16	21.9	18.8	20.8	18	18.3
Protein flightless-1 homolog OS=Homo sapiens OX=9606 GN=FLII PE=1 SV=2	FLII	31.7	27.1	27.2	27.8	27.1	34.2	30.4	28.1	33.9	23.4
Filamin-A OS=Homo sapiens OX=9606 GN=FLNA PE=1 SV=4	FLNA	15218.3	13428.6	11898.6	14769.1	15396.4	16664.2	12836.5	14462.2	14042.4	14280.6
Filamin-B OS=Homo sapiens OX=9606 GN=FLNB PE=1 SV=2	FLNB	3375	3029.5	2605	3036.8	3084.1	3705.4	2824.9	2974.1	2757.4	2785.6
Synaptic functional regulator FMR1 OS=Homo sapiens OX=9606 GN=FMR1 PE=1 SV=1	FMR1	240.1	224.6	196.8	236.1	213.9	271	224.8	192.4	227.2	190.4
Fascin OS=Homo sapiens OX=9606 GN=FSCN1 PE=1 SV=3	FSCN1	464.5	411.4	352.5	548.6	539.7	535.8	395.3	520.9	529.9	498.7
pre-rRNA 2'-O-ribose RNA methyltransferase FTSJ3 OS=Homo sapiens OX=9606 GN=FTSJ3 PE=1 SV=2	FTSJ3	1682.1	1344.1	1496.9	1772.2	1702.7	2131.1	1566.8	1698.4	1629.1	1662.3
Far upstream element-binding protein 1 OS=Homo sapiens OX=9606 GN=FUBP1 PE=1 SV=3	FUBP1	4186.6	3694.6	3258.1	3720.8	3704.4	4336.7	3152.9	3492.9	3363	3463.7
Far upstream element-binding protein 3 OS=Homo sapiens OX=9606 GN=FUBP3 PE=1 SV=2	FUBP3	2115.8	1986.7	1529.3	1688.5	1569.7	2076.7	1600.7	1585.5	1540.8	1368.7
FUN14 domain-containing protein 1 OS=Homo sapiens OX=9606 GN=FUNDC1 PE=1 SV=1	FUNDC1	98.7	77.2	85	112	109.4	134.6	77.3	113.7	107.5	102
RNA-binding protein FUS OS=Homo sapiens OX=9606 GN=FUS PE=1 SV=1	FUS	9744.1	8359.5	8021.9	7889.1	8185.2	10303.9	7729.7	7891.4	7428	8455.1
Fragile X mental retardation syndrome-related protein 1 OS=Homo sapiens OX=9606 GN=FXR1 PE=1 SV=1	FXR1	492.4	404.3	399.9	469.3	463.5	586.8	466.4	471.9	442.5	438.9
Fragile X mental retardation syndrome-related protein 2 OS=Homo sapiens OX=9606 GN=FXR2 PE=1 SV=2	FXR2	50	45.1	49.4	73.1	58.4	54.6	47.6	53.8	46.3	55.5
Ras GTPase-activating protein-binding protein 1 OS=Homo sapiens OX=9606 GN=G3BP1 PE=1 SV=1	G3BP1	2954.6	2699.5	2116.8	2637.2	2672.1	3073.9	2341.1	2629.8	2571.9	2432.6
Ras GTPase-activating protein-binding protein 2 OS=Homo sapiens OX=9606 GN=G3BP2 PE=1 SV=2	G3BP2	2045.3	1797.2	1547.8	1697.9	1790.7	2231.6	1676.8	1711.6	1671.2	1619.6
Glucose-6-phosphate 1-dehydrogenase OS=Homo sapiens OX=9606 GN=G6PD PE=1 SV=4	G6PD	585.3	531.3	455.7	472.5	504.8	666.7	480.7	459.1	473.5	447.1
GA-binding protein alpha chain OS=Homo sapiens OX=9606 GN=GABPA PE=1 SV=1	GABPA	216.4	180.6	162.8	177.5	191.4	235.5	179.5	176.9	172	182.2
Growth arrest and DNA damage-inducible proteins-interacting protein 1 OS=Homo sapiens OX=9606 GN=GADD45GIP1 PE=1 SV=1	GADD45GIP1	68.3	68.3	63.1	82.1	75.8	74.6	57.2	67	76.6	68.1
Galactokinase OS=Homo sapiens OX=9606 GN=GALK1 PE=1 SV=1	GALK1	732.5	636.8	517.6	585.2	611.4	793.3	600.5	562.7	584.9	544.1
Galactose mutarotase OS=Homo sapiens OX=9606 GN=GALM PE=1 SV=1	GALM	202.8	168.6	152.9	182.7	189.7	232	166.5	166.3	175.4	178.4
Polypeptide N-acetylgalactosaminyltransferase 2 OS=Homo sapiens OX=9606 GN=GALNT2 PE=1 SV=1	GALNT2	96.4	78.5	76.3	84.4	72.5	118.9	70	75.9	89.9	74.3
Neutral alpha-glucosidase AB OS=Homo sapiens OX=9606 GN=GANAB PE=1 SV=1	GANAB	48.2	44.9	43.6	58.9	48.8	62.4	47	45.7	55.1	43
Neutral alpha-glucosidase AB OS=Homo sapiens OX=9606 GN=GANAB PE=1 SV=3	GANAB	1321.5	1205.7	1138	1314.2	1301.8	1648.5	1162.3	1198.8	1232	1112.3
Glyceraldehyde-3-phosphate dehydrogenase OS=Homo sapiens OX=9606 GN=GAPDH PE=1 SV=3	GAPDH	91551	81354.7	74034.7	78695	84015.7	101443	82015.7	76666.3	85171	80196.2
GTPase-activating protein and VPS9 domain-containing protein 1 OS=Homo sapiens OX=9606 GN=GAPVD1 PE=1 SV=2	GAPVD1	20.4	15.5	11.9	16.3	13.8	18.6	16.2	11.3	17.9	12.3
H/ACA ribonucleoprotein complex subunit 1 OS=Homo sapiens OX=9606 GN=GAR1 PE=1 SV=1	GAR1	206.3	152.8	156.3	198.7	203.9	257.5	196	202.9	196.8	200
Glycine--tRNA ligase OS=Homo sapiens OX=9606 GN=GARS1 PE=4 SV=1	GARS1	3082.4	2638.2	2354.8	2715.6	2959.3	3558.2	2565.9	2797.1	2820.8	2734.2
Trifunctional purine biosynthetic protein adenosine-3 OS=Homo sapiens OX=9606 GN=GART PE=1 SV=1	GART	7662.3	6662.7	5866	6654.4	7116.4	8853.2	6295	6501.4	6354.4	6218.9
Transcriptional repressor p66-beta OS=Homo sapiens OX=9606 GN=GATAD2B PE=1 SV=1	GATAD2B	56.2	54.3	34.2	45.3	50.5	60	48.1	44.1	44.8	46.5
Golgi-specific brefeldin A-resistance guanine nucleotide exchange factor 1 OS=Homo sapiens OX=9606 GN=GBF1 PE=1 SV=2	GBF1	225	183.2	137.2	163.4	178.1	209.5	148.1	166.9	176.3	151.4
eIF-2-alpha kinase activator GCN1 OS=Homo sapiens OX=9606 GN=GCN1 PE=1 SV=6	GCN1	2067.2	1672.1	1657.2	1989	2129.4	2425.9	1799.1	2021.5	1994	1935.4
Glycine cleavage system H protein, mitochondrial (Fragment) OS=Homo sapiens OX=9606 GN=GCSH PE=1 SV=1	GCSH	492.3	496.1	495.3	543.8	432.5	552.5	398.5	485.8	438.9	416.3
Rab GDP dissociation inhibitor beta OS=Homo sapiens OX=9606 GN=GDI2 PE=1 SV=2	GDI2	8169.4	6836.1	6119.7	7648	8523.9	9860.8	6488.3	7953.5	6896.7	6970.1
Gem-associated protein 4 OS=Homo sapiens OX=9606 GN=GEMIN4 PE=1 SV=1	GEMIN4	148.2	133.4	123.6	156.3	157.4	215.3	127.3	138.2	134.5	134.4
Gem-associated protein 5 OS=Homo sapiens OX=9606 GN=GEMIN5 PE=1 SV=3	GEMIN5	22.6	18.3	24.3	20.6	26.8	28.7	17.8	21.9	22.7	21.7
Golgi to ER traffic protein 4 homolog OS=Homo sapiens OX=9606 GN=GET4 PE=1 SV=1	GET4	294.4	217.5	226.4	257.8	268.4	354.1	235.3	264.2	218	230.1
Elongation factor G, mitochondrial OS=Homo sapiens OX=9606 GN=GFM1 PE=1 SV=2	GFM1	28.5	28.6	24.7	31.3	27.8	36.5	30	30	34.7	29.5
Glutamine--fructose-6-phosphate transaminase (isomerizing) OS=Homo sapiens OX=9606 GN=GFPT1 PE=1 SV=1	GFPT1	284	219.8	189.1	206	241.5	296.3	214.6	213	203.3	201.2
GRB10-interacting GYF protein 2 OS=Homo sapiens OX=9606 GN=GIGYF2 PE=1 SV=1	GIGYF2	480.7	411.3	328.9	358	404.9	449.4	354.6	381.3	381.5	372.7
DNA replication complex GINS protein PSF1 OS=Homo sapiens OX=9606 GN=GINS1 PE=1 SV=1	GINS1	105.3	81.7	84.1	86.3	100.3	125.5	100.5	94.2	90.9	92.9
DNA replication complex GINS protein SLD5 OS=Homo sapiens OX=9606 GN=GINS4 PE=1 SV=1	GINS4	49.9	44.6	33.9	44.3	42.2	48.2	38	42.1	42.5	36.7
PDZ domain-containing protein GIPC1 OS=Homo sapiens OX=9606 GN=GIPC1 PE=1 SV=2	GIPC1	780.6	674.4	499.7	550	631.9	738.8	562.2	571.9	567.4	569.8
Alpha-galactosidase OS=Homo sapiens OX=9606 GN=GLA PE=1 SV=1	GLA	59	54.7	41.3	55	51.8	61.9	45	52.1	48.3	53.1
Lactoylglutathione lyase OS=Homo sapiens OX=9606 GN=GLO1 PE=1 SV=4	GLO1	4863.1	4512	3463.2	4569.3	4640.9	4942.6	3703.4	4356.1	4705.8	4067.1
Glyoxalase domain-containing protein 4 OS=Homo sapiens OX=9606 GN=GLOD4 PE=1 SV=1	GLOD4	1886.6	1598.4	1298.9	1452.9	1575.8	1944.6	1445	1472	1512.3	1429.6
Glutaredoxin-3 OS=Homo sapiens OX=9606 GN=GLRX3 PE=1 SV=2	GLRX3	2271.7	1989.8	1550.7	1912.7	2019.1	2450	1799	1996.3	1808.7	1852.2
Glutaredoxin-related protein 5, mitochondrial OS=Homo sapiens OX=9606 GN=GLRX5 PE=1 SV=2	GLRX5	583	570.3	479.4	442.5	381.5	594.6	444.8	426.4	391.5	391
Glutamate dehydrogenase 1, mitochondrial OS=Homo sapiens OX=9606 GN=GLUD1 PE=1 SV=2	GLUD1	797.1	724.6	659.4	778.5	776	987.8	709.7	762.3	734.5	702.3
Putative oxidoreductase GLYR1 (Fragment) OS=Homo sapiens OX=9606 GN=GLYR1 PE=1 SV=8	GLYR1	76.8	54.3	61.7	77.4	69.1	97.3	67.3	75.2	72.8	65
Ganglioside GM2 activator OS=Homo sapiens OX=9606 GN=GM2A PE=1 SV=4	GM2A	25.3	23.3	15.6	17.8	21.9	26.3	22.5	17.7	20.7	17.3
Glia maturation factor beta (Fragment) OS=Homo sapiens OX=9606 GN=GMFB PE=1 SV=1	GMFB	332	329.2	239.4	267.4	240	316.8	218.6	241.3	240.6	196.2
GMP synthase [glutamine-hydrolyzing] OS=Homo sapiens OX=9606 GN=GMPS PE=1 SV=1	GMPS	1285.8	1120.4	986.8	1090.3	1218.9	1423.5	1086.9	1101	1220.2	1161.1
Guanine nucleotide-binding protein subunit alpha-11 (Fragment) OS=Homo sapiens OX=9606 GN=GNA11 PE=1 SV=1	GNA11	40.4	29.7	30.9	36.3	40.3	37	29.9	33.6	37.3	30.1
Guanine nucleotide-binding protein G(i) subunit alpha OS=Homo sapiens OX=9606 GN=GNAI3 PE=1 SV=3	GNAI3	643.3	565	576.1	679.3	674.1	850.8	534.9	671.1	624.8	621.1
Guanine nucleotide-binding protein G(s) subunit alpha isoforms short (Fragment) OS=Homo sapiens OX=9606 GN=GNAS PE=1 SV=1	GNAS	70.4	59.5	68.3	77.5	83.3	103	57	74.3	73.7	66.8
Guanine nucleotide-binding protein G(I)/G(S)/G(T) subunit beta-1 OS=Homo sapiens OX=9606 GN=GNB1 PE=1 SV=3	GNB1	1082.7	992.4	823.2	1040	994.9	1260.1	940.1	948.2	979.4	937.2
Guanine nucleotide-binding protein G(I)/G(S)/G(T) subunit beta-2 OS=Homo sapiens OX=9606 GN=GNB2 PE=1 SV=3	GNB2	275.7	241.4	222.9	286.7	254.4	298	250	239.9	246.9	233.6
Guanine nucleotide-binding protein G(I)/G(S)/G(O) subunit gamma-5 OS=Homo sapiens OX=9606 GN=GNG5 PE=1 SV=3	GNG5	97.5	78.4	83.3	91.7	102.3	130.5	68	87.3	85.5	82.4
Guanine nucleotide-binding protein-like 3 OS=Homo sapiens OX=9606 GN=GNL3 PE=1 SV=2	GNL3	809.9	613.7	686	789.2	810.2	1043.6	747.7	769.2	780.1	784.2
Glucosamine-6-phosphate isomerase 1 OS=Homo sapiens OX=9606 GN=GNPDA1 PE=1 SV=1	GNPDA1	705.9	631.2	531.8	602.8	684.3	857.4	556.8	622.2	586.2	605.2
Golgi phosphoprotein 3-like OS=Homo sapiens OX=9606 GN=GOLPH3L PE=1 SV=1	GOLPH3L	100.4	84.5	71.3	68.1	81.4	98.5	68.3	83.9	70.8	83.5
Golgi reassembly-stacking protein 2 OS=Homo sapiens OX=9606 GN=GORASP2 PE=1 SV=3	GORASP2	60.5	52.7	41.9	49.3	36.8	62.3	48	44.5	41.4	42.8
Aspartate aminotransferase, cytoplasmic OS=Homo sapiens OX=9606 GN=GOT1 PE=1 SV=3	GOT1	1526.5	1356.1	1115.7	1233.8	1290.8	1699.5	1221.3	1215.4	1237.9	1178.2
Aspartate aminotransferase, mitochondrial OS=Homo sapiens OX=9606 GN=GOT2 PE=1 SV=3	GOT2	3736.4	3308.9	2929.3	3222.2	3267.2	4196.3	3111.9	3228.9	2953.9	2947.2
G patch domain-containing protein 4 (Fragment) OS=Homo sapiens OX=9606 GN=GPATCH4 PE=1 SV=1	GPATCH4	76.4	56.8	70.1	94.9	82.4	94.9	70.6	91.6	89.1	86.6
Glucose-6-phosphate isomerase OS=Homo sapiens OX=9606 GN=GPI PE=1 SV=4	GPI	8324.1	6662.7	6561.3	7639.9	8319.9	10196.4	7331.1	7743.7	7675.7	7583.2
COP9 signalosome complex subunit 1 OS=Homo sapiens OX=9606 GN=GPS1 PE=1 SV=4	GPS1	693.1	626.8	539.5	625.8	647.1	799.7	595.3	602.4	617.8	568.6
Glutathione peroxidase OS=Homo sapiens OX=9606 GN=GPX1 PE=1 SV=1	GPX1	151.4	142.3	100.4	136.6	129.9	146.7	115.1	119.4	125.6	116.9
Growth factor receptor-bound protein 2 OS=Homo sapiens OX=9606 GN=GRB2 PE=1 SV=1	GRB2	1688.1	1613	1209	1413.5	1373.1	1651.7	1357.5	1327.6	1420.1	1273.2
Glyoxylate reductase/hydroxypyruvate reductase OS=Homo sapiens OX=9606 GN=GRHPR PE=1 SV=1	GRHPR	30.7	29.7	32.8	36.2	32.3	39.8	29.5	34.8	34.8	33.7
Glutamate receptor ionotropic, NMDA 2D OS=Homo sapiens OX=9606 GN=GRIN2D PE=1 SV=2	GRIN2D	741.5	583.2	563.1	573.2	629.9	821.6	625.1	616.5	607.6	632.2
GrpE protein homolog 1, mitochondrial OS=Homo sapiens OX=9606 GN=GRPEL1 PE=1 SV=2	GRPEL1	7576.7	7158.8	5528.2	5924.5	5864.7	8102.7	5506	6017.5	5310.5	5028
Glutamate-rich WD repeat-containing protein 1 OS=Homo sapiens OX=9606 GN=GRWD1 PE=1 SV=1	GRWD1	784.8	713.3	543.2	719.2	707.4	817.8	617.7	696.6	728.9	635.6
Glycogen synthase kinase-3 alpha OS=Homo sapiens OX=9606 GN=GSK3A PE=1 SV=2	GSK3A	20.2	23.2	16.2	25.1	20.3	24.2	19.9	22.3	21.5	21.2
Glycogen synthase kinase-3 beta OS=Homo sapiens OX=9606 GN=GSK3B PE=1 SV=2	GSK3B	59.9	42.6	51.2	53.1	66.7	81.6	45.7	52.1	51.5	41.3
Actin-depolymerizing factor OS=Homo sapiens OX=9606 GN=GSN PE=1 SV=1	GSN	19.2	23.7	17	13.4	11	21.3	20.1	15.2	11.2	13
Eukaryotic peptide chain release factor GTP-binding subunit ERF3A OS=Homo sapiens OX=9606 GN=GSPT1 PE=1 SV=1	GSPT1	2951.5	2561	2156.8	2457.2	2735.9	3263.6	2359	2451.9	2335.5	2436.7
Glutathione reductase, mitochondrial OS=Homo sapiens OX=9606 GN=GSR PE=1 SV=2	GSR	1718.9	1524.4	1346.2	1559.8	1579.8	1891.6	1418.8	1430	1575.1	1385.7
Glutathione synthetase OS=Homo sapiens OX=9606 GN=GSS PE=1 SV=1	GSS	36.2	28.1	23.6	27.9	30.5	35.6	27.6	30	34.4	32.5
Glutathione S-transferase kappa OS=Homo sapiens OX=9606 GN=GSTK1 PE=1 SV=1	GSTK1	880.2	872.6	711.3	863.8	901.2	1113.2	736.5	829	806.3	803.7
Glutathione S-transferase OS=Homo sapiens OX=9606 GN=GSTM2 PE=1 SV=1	GSTM2	86.7	74.3	75.8	79.3	74.5	105.4	68.9	70.6	79.2	68.5
Glutathione S-transferase Mu 3 OS=Homo sapiens OX=9606 GN=GSTM3 PE=1 SV=3	GSTM3	807.7	682.8	589.1	633	706.7	910.9	628.3	657.4	639.4	666.8
Glutathione S-transferase omega-1 OS=Homo sapiens OX=9606 GN=GSTO1 PE=1 SV=2	GSTO1	3130.6	2688.9	2215.2	2337.3	2652.5	3442.2	2436.8	2417.1	2403.1	2389.3
GST class-pi OS=Homo sapiens OX=9606 GN=GSTP1 PE=1 SV=1	GSTP1	9874.7	8365.1	6700.4	7845.7	8628.7	10883.3	7292.9	7690.5	7392	7197.4
General transcription factor II-I OS=Homo sapiens OX=9606 GN=GTF2I PE=1 SV=2	GTF2I	2847.1	2344.9	2250.1	2661.6	2780.4	3346.6	2445	2627.6	2554.8	2605.4
General transcription factor 3C polypeptide 1 OS=Homo sapiens OX=9606 GN=GTF3C1 PE=1 SV=4	GTF3C1	33.6	29.1	22.2	30.1	35	36.5	30.6	31.5	32.1	28.5
General transcription factor 3C polypeptide 4 OS=Homo sapiens OX=9606 GN=GTF3C4 PE=1 SV=2	GTF3C4	245.4	213.4	179	199.4	228.5	274.6	204.2	213.8	214.6	198.3
Nucleolar GTP-binding protein 1 OS=Homo sapiens OX=9606 GN=GTPBP4 PE=1 SV=3	GTPBP4	1310.6	992.3	1048.2	1235.7	1338.9	1603.1	1152.2	1153	1216.8	1272.1
Histone H1.10 OS=Homo sapiens OX=9606 GN=H1-10 PE=1 SV=1	H1-10	265.2	217.7	192	248.3	229.3	288.8	249.3	211.3	166.2	259.3
Histone H1.2 OS=Homo sapiens OX=9606 GN=H1-2 PE=1 SV=2	H1-2	2919.3	2195.3	1294.6	1605.9	1314.3	1879.7	3059	1670.3	857.8	2396.8
Histone H1.3 OS=Homo sapiens OX=9606 GN=H1-3 PE=1 SV=2	H1-3	1080.1	826	508.8	602.9	532.3	726.6	1085.8	658.7	341.8	866.9
Histone H1.4 OS=Homo sapiens OX=9606 GN=H1-4 PE=1 SV=2	H1-4	11117.1	8218.2	4501	5602	4501	6927.8	11333.2	5769.4	2652	8108.1
Histone H2AX OS=Homo sapiens OX=9606 GN=H2AX PE=1 SV=2	H2AX	2437	1922.5	2295.3	2494.9	2283.7	3583.2	2404.5	2615.3	2216.6	2094.7
Histone H2A.V OS=Homo sapiens OX=9606 GN=H2AZ2 PE=1 SV=3	H2AZ2	13275.2	10244.5	10177.6	11902.9	12305.8	14807.2	11746.3	11172.6	11854.3	13038.9
Histone H2B type 3-B OS=Homo sapiens OX=9606 GN=H2BU1 PE=1 SV=3	H2BU1	6465.4	4740.9	6559.3	6822.4	6368.8	9293.5	6769.4	7246.2	6699.3	6126.5
Histone H3.1t OS=Homo sapiens OX=9606 GN=H3-4 PE=1 SV=3	H3-4	4482.7	5293.5	2558.2	3249.5	2963.4	4077.6	4256.1	3426.3	2861.2	4790.5
Histone H4 OS=Homo sapiens OX=9606 GN=H4C1 PE=1 SV=2	H4C1	19327.1	22377.7	11088.1	13927.9	13111.8	16768.1	17258	14592.7	12387.1	22370.8
Very-long-chain (3R)-3-hydroxyacyl-CoA dehydratase 3 OS=Homo sapiens OX=9606 GN=HACD3 PE=1 SV=2	HACD3	882.2	655.3	955.5	1085.7	1097.9	1429.9	740.8	1074.8	1130.5	987.8
Hydroxyacyl-coenzyme A dehydrogenase, mitochondrial OS=Homo sapiens OX=9606 GN=HADH PE=1 SV=3	HADH	739.4	663.4	580.8	596.2	668.3	861.6	590.1	634.8	607.8	597
Enoyl-CoA hydratase OS=Homo sapiens OX=9606 GN=HADHA PE=1 SV=2	HADHA	2093.6	1823.2	1920	2152.8	2163.7	2803.1	2025.9	2121	2152.1	1981.9
Trifunctional enzyme subunit beta, mitochondrial OS=Homo sapiens OX=9606 GN=HADHB PE=1 SV=3	HADHB	1070.1	926.2	921	989.3	1030.1	1355.5	1003.4	964.8	995.3	925.5
Hydroxyacylglutathione hydrolase, mitochondrial OS=Homo sapiens OX=9606 GN=HAGH PE=1 SV=2	HAGH	52	47.7	38.3	48	40.6	62.7	43.7	55.5	42.7	37.1
Histidine--tRNA ligase, cytoplasmic OS=Homo sapiens OX=9606 GN=HARS1 PE=4 SV=1	HARS1	3703.5	3134.4	2754.9	3031.1	3343.9	4180.8	3092.9	3152	3157.9	3054.3
Histone acetyltransferase type B catalytic subunit OS=Homo sapiens OX=9606 GN=HAT1 PE=1 SV=1	HAT1	1374.9	1144.8	1102.2	1280.2	1442.6	1719.4	1192.6	1331.7	1375	1314.6
HBS1-like protein OS=Homo sapiens OX=9606 GN=HBS1L PE=1 SV=1	HBS1L	1015	796.2	744.8	845.7	930.6	1109.8	859.1	889.4	834.2	899.2
Cytochrome c-type heme lyase OS=Homo sapiens OX=9606 GN=HCCS PE=1 SV=1	HCCS	92.6	79.5	88.3	92.4	91.2	108.1	76.6	86.2	91.1	79
Host cell factor 1 OS=Homo sapiens OX=9606 GN=HCFC1 PE=1 SV=2	HCFC1	881.5	741.6	651	739.1	785	931.5	743.5	760	708.5	788.9
Histone deacetylase 1 OS=Homo sapiens OX=9606 GN=HDAC1 PE=1 SV=1	HDAC1	355.7	282.7	298.6	361.8	369.8	491.7	325.1	329.1	359.2	317.5
Histone deacetylase 2 OS=Homo sapiens OX=9606 GN=HDAC2 PE=1 SV=2	HDAC2	1122.7	964.7	978.4	1173.7	1160	1387.3	1046	1107.2	1115	1122.5
5'-deoxynucleotidase HDDC2 OS=Homo sapiens OX=9606 GN=HDDC2 PE=1 SV=1	HDDC2	26.4	18.6	16.9	19.2	25.4	21.8	19.3	15.4	21.7	16.5
Hepatoma-derived growth factor OS=Homo sapiens OX=9606 GN=HDGF PE=1 SV=1	HDGF	3810.4	3344.2	2976.7	3301.8	3317.8	3862.1	3006.6	3222.4	3003.2	2995.9
Hepatoma-derived growth factor-related protein 2 OS=Homo sapiens OX=9606 GN=HDGFL2 PE=1 SV=1	HDGFL2	929.3	827.7	727.3	783.7	810.9	972.5	746.8	741.2	769.8	765.3
Haloacid dehalogenase-like hydrolase domain-containing 5 OS=Homo sapiens OX=9606 GN=HDHD5 PE=1 SV=1	HDHD5	17.6	18.5	15.3	19.3	16.5	25	16.2	17.3	17.9	15.5
High density lipoprotein binding protein (Vigilin), isoform CRA_a OS=Homo sapiens OX=9606 GN=HDLBP PE=1 SV=1	HDLBP	3776.4	3304.3	2908.4	3401.1	3597.5	4321.3	3271.2	3288.6	3316.2	3103.4
HEAT repeat-containing protein 1 OS=Homo sapiens OX=9606 GN=HEATR1 PE=1 SV=1	HEATR1	547.7	495	474.7	592.1	608.8	679.4	494.6	544.6	546.7	552.9
HEAT repeat-containing protein 3 OS=Homo sapiens OX=9606 GN=HEATR3 PE=1 SV=2	HEATR3	26.4	20.9	20.6	36.3	39.5	35.1	23.8	31.8	23.2	31.9
Heme-binding protein 1 OS=Homo sapiens OX=9606 GN=HEBP1 PE=1 SV=1	HEBP1	612.6	526	432.8	453.6	477.1	628.6	449	464.4	458.5	435.4
[truncated: 1,272 more rows]

## Sheet: lenti WT vs lenti I216E H2O2
Description	Gene Symbol	Abundance: F1: 127C, Sample, 1, WT DOX H2O2	Abundance: F1: 128N, Sample, 2, WT DOX H2O2	Abundance: F1: 128C, Sample, 3,WT DOX H2O2	Abundance: F1: 126, Sample, 1, WT H2O2	Abundance: F1: 127N, Sample, 2, WT H2O2	Abundance: F1: 130N, Sample, 1, I216E DOX H2O2	Abundance: F1: 130C, Sample, 2, I216E DOX H2O2	Abundance: F1: 131, Sample, 3, I216E DOX H2O2	Abundance: F1: 129N, Sample, 1, I216E H2O2	Abundance: F1: 129C, Sample, 2, I216E H2O2
[truncated: 2,830 more rows]

[truncated: 1 more sheets: lenti WT vs lenti F117A H2O2]
